# Supplementary material for: Whole-transcriptome analysis of differentially expressed genes between ray and disc florets and identification of flowering regulatory genes in Chrysanthemum morifolium
Source: Frontiers journal article supplement (doi:10.3389/fpls.2022.947331), 2022-08-04
Supplement: Data_Sheet_1.XLS [file Data_Sheet_1.XLS]

## Sheet: PTS-vs-PTG-diff-pval-0.05-FC-2.
gene_id	baseMean_control_PTG	baseMean_case_PTS	foldChange	pval	up_down	gene_symbol	description	GO_id	GO_term
Cse_sc000001.1_g050.1	51.7443	24.902	0.481251	0.0176727	Down	SHW1	Protein SHORT HYPOCOTYL IN WHITE LIGHT 1	GO:0005634,GO:0009416,GO:0009642,GO:0009738,GO:0009787,GO:0009908,GO:0009958,GO:0010100,GO:0010380,GO:0016021,GO:0031540,GO:0031965,GO:0048578,GO:0090227,GO:1901333	nucleus|response to light stimulus|response to light intensity|abscisic acid-activated signaling pathway|regulation of abscisic acid-activated signaling pathway|flower development|positive gravitropism|negative regulation of photomorphogenesis|regulation of chlorophyll biosynthetic process|integral component of membrane|regulation of anthocyanin biosynthetic process|nuclear membrane|positive regu…
Cse_sc000001.1_g110.1	807.037	1994.41	2.47127	2.61506e-05	Up	SCPL18	Serine carboxypeptidase-like 18	GO:0004185,GO:0005576,GO:0019748	serine-type carboxypeptidase activity|extracellular region|secondary metabolic process
Cse_sc000001.1_g160.1	141.209	0.330986	0.00234394	1.428e-11	Down	CHX15	Cation/H(+) antiporter 15	GO:0006813,GO:0006885,GO:0012505,GO:0015299,GO:0016021	potassium ion transport|regulation of pH|endomembrane system|solute:proton antiporter activity|integral component of membrane
Cse_sc000001.1_g170.1	34.2025	2.81681	0.0823569	7.78357e-08	Down	EARLI1	Lipid transfer protein EARLI 1	GO:0005576,GO:0005783,GO:0009409,GO:0009505,GO:0009506,GO:0009651,GO:0009682,GO:0009707,GO:0009737,GO:0050832	extracellular region|endoplasmic reticulum|response to cold|plant-type cell wall|plasmodesma|response to salt stress|induced systemic resistance|chloroplast outer membrane|response to abscisic acid|defense response to fungus
Cse_sc000001.1_g220.1	4360.11	1248.45	0.286333	1.01527e-08	Down		14 kDa proline-rich protein DC2.15	GO:0016021	integral component of membrane
Cse_sc000001.1_g250.1	99.584	42.1662	0.423423	0.00151725	Down	SCL6	Scarecrow-like protein 6	GO:0003700,GO:0005634,GO:0006355,GO:0007623,GO:0030154,GO:0043565,GO:0048768,GO:0051301	DNA-binding transcription factor activity|nucleus|regulation of transcription, DNA-templated|circadian rhythm|cell differentiation|sequence-specific DNA binding|root hair cell tip growth|cell division
Cse_sc000002.1_g140.1	51.9729	2.4481	0.0471034	0.00444582	Down	NPF4.6	Protein NRT1/ PTR FAMILY 4.6	GO:0005886,GO:0009624,GO:0010119,GO:0015333,GO:0016021,GO:0035673,GO:0042128,GO:0080168,GO:0090440,GO:1904680	plasma membrane|response to nematode|regulation of stomatal movement|peptide:proton symporter activity|integral component of membrane|oligopeptide transmembrane transporter activity|nitrate assimilation|abscisic acid transport|abscisic acid transmembrane transporter activity|peptide transmembrane transporter activity
Cse_sc000003.1_g120.1	47.5294	96.3677	2.02754	0.0131756	Up
Cse_sc000003.1_g130.1	193.381	487.072	2.51872	0.000426095	Up
Cse_sc000004.1_g190.1	1.30151	7.38203	5.67189	0.0359689	Up	At3g47570	Probable LRR receptor-like serine/threonine-protein kinase At3g47570
Cse_sc000005.1_g160.1	2031.98	6327.52	3.11397	0.015076	Up	MIOX2	Inositol oxygenase 2	GO:0005506,GO:0005737,GO:0019310,GO:0019853,GO:0050113	iron ion binding|cytoplasm|inositol catabolic process|L-ascorbic acid biosynthetic process|inositol oxygenase activity
Cse_sc000006.1_g190.1	18.5306	299.039	16.1376	4.92507e-24	Up	NPF5.7	Protein NRT1/ PTR FAMILY 5.7	GO:0005886,GO:0015333,GO:0016021,GO:0035673,GO:1904680	plasma membrane|peptide:proton symporter activity|integral component of membrane|oligopeptide transmembrane transporter activity|peptide transmembrane transporter activity
Cse_sc000006.1_g210.1	41.173	0.321973	0.00782	0.00284943	Down	VSR2	Vacuolar-sorting receptor 2	GO:0000139,GO:0005509,GO:0005768,GO:0005802,GO:0006511,GO:0006623,GO:0006896,GO:0016020,GO:0016021,GO:0017119,GO:0030665,GO:0031902,GO:0061630	Golgi membrane|calcium ion binding|endosome|trans-Golgi network|ubiquitin-dependent protein catabolic process|protein targeting to vacuole|Golgi to vacuole transport|membrane|integral component of membrane|Golgi transport complex|clathrin-coated vesicle membrane|late endosome membrane|ubiquitin protein ligase activity
Cse_sc000008.1_g080.1	445.438	104.745	0.23515	2.19631e-05	Down	IP5P12	Type I inositol polyphosphate 5-phosphatase 12	GO:0004445,GO:0005634,GO:0007584,GO:0009611,GO:0009630,GO:0009637,GO:0009737,GO:0009846,GO:0010087,GO:0010182,GO:0010252,GO:0046855,GO:0046856,GO:0046872,GO:0048364,GO:0052658,GO:0052659	inositol-polyphosphate 5-phosphatase activity|nucleus|response to nutrient|response to wounding|gravitropism|response to blue light|response to abscisic acid|pollen germination|phloem or xylem histogenesis|sugar mediated signaling pathway|auxin homeostasis|inositol phosphate dephosphorylation|phosphatidylinositol dephosphorylation|metal ion binding|root development|inositol-1,4,5-trisphosphate 5-…
Cse_sc000008.1_g090.1	546.782	1127.26	2.06163	0.000752196	Up	At5g02620	Ankyrin repeat-containing protein At5g02620	GO:0005783,GO:0005886,GO:0016021	endoplasmic reticulum|plasma membrane|integral component of membrane
Cse_sc000008.1_g180.1	22.0924	0.755446	0.0341949	1.94727e-07	Down	PLAT2	PLAT domain-containing protein 2	GO:0004096,GO:0005783,GO:0009507,GO:0009579,GO:0016020,GO:0020037	catalase activity|endoplasmic reticulum|chloroplast|thylakoid|membrane|heme binding
Cse_sc000009.1_g010.1	28.9965	4.82243	0.166311	4.69513e-05	Down	DTX51	Protein DETOXIFICATION 51	GO:0005770,GO:0006855,GO:0006952,GO:0010008,GO:0010015,GO:0010252,GO:0015238,GO:0015297,GO:0016021,GO:0031348,GO:0031902,GO:0046620	late endosome|drug transmembrane transport|defense response|endosome membrane|root morphogenesis|auxin homeostasis|drug transmembrane transporter activity|antiporter activity|integral component of membrane|negative regulation of defense response|late endosome membrane|regulation of organ growth
Cse_sc000009.1_g090.1	2645.47	139.619	0.0527766	4.03863e-09	Down		Profilin-2	GO:0003779,GO:0005737,GO:0005856	actin binding|cytoplasm|cytoskeleton
Cse_sc000010.1_g010.1	28.1179	71.3541	2.53768	0.0381652	Up	N	TMV resistance protein N	GO:0005524,GO:0005737,GO:0007165,GO:0009626,GO:0043531	ATP binding|cytoplasm|signal transduction|plant-type hypersensitive response|ADP binding
Cse_sc000012.1_g060.1	23.4285	4.28998	0.183109	0.000265285	Down	At1g75040	Pathogenesis-related protein 5	GO:0005618,GO:0005773,GO:0009615,GO:0009627,GO:0010224,GO:0031540,GO:0046686,GO:0048046	cell wall|vacuole|response to virus|systemic acquired resistance|response to UV-B|regulation of anthocyanin biosynthetic process|response to cadmium ion|apoplast
Cse_sc000012.1_g140.1	5807.49	1879.11	0.323567	1.33366e-06	Down	PAL1	Phenylalanine ammonia-lyase 1	GO:0005737,GO:0006559,GO:0009800,GO:0016597,GO:0032991,GO:0045548	cytoplasm|L-phenylalanine catabolic process|cinnamic acid biosynthetic process|amino acid binding|protein-containing complex|phenylalanine ammonia-lyase activity
Cse_sc000012.1_g170.1	34.8849	589.626	16.902	9.63139e-05	Up	SYT3	Synaptotagmin-3	GO:0005783,GO:0006869,GO:0008289,GO:0016021,GO:0046872	endoplasmic reticulum|lipid transport|lipid binding|integral component of membrane|metal ion binding
Cse_sc000015.1_g050.1	313.064	849.142	2.71236	6.08464e-06	Up	RABA3	Ras-related protein RABA3	GO:0003924,GO:0005525,GO:0005634,GO:0005768,GO:0005794,GO:0006886,GO:0009504,GO:0010008,GO:0032482,GO:0042546	GTPase activity|GTP binding|nucleus|endosome|Golgi apparatus|intracellular protein transport|cell plate|endosome membrane|Rab protein signal transduction|cell wall biogenesis
Cse_sc000016.1_g040.1	100.372	39.7466	0.395995	0.000493639	Down
Cse_sc000016.1_g070.1	10376.5	21610.8	2.08266	0.000532791	Up	RH14	DEAD-box ATP-dependent RNA helicase 14	GO:0000184,GO:0003723,GO:0004004,GO:0005524,GO:0005634,GO:0006364,GO:0016887	nuclear-transcribed mRNA catabolic process, nonsense-mediated decay|RNA binding|ATP-dependent RNA helicase activity|ATP binding|nucleus|rRNA processing|ATPase activity
Cse_sc000017.1_g020.1	159.021	54.9663	0.345655	0.0028683	Down	SPL6	Squamosa promoter-binding-like protein 6	GO:0003677,GO:0003700,GO:0005634,GO:0006355,GO:0010468,GO:0042742,GO:0046872	DNA binding|DNA-binding transcription factor activity|nucleus|regulation of transcription, DNA-templated|regulation of gene expression|defense response to bacterium|metal ion binding
Cse_sc000017.1_g160.1	699.936	202.83	0.289784	4.38875e-06	Down	PVA21	Vesicle-associated protein 2-1	GO:0005783,GO:0005789,GO:0005886,GO:0016021	endoplasmic reticulum|endoplasmic reticulum membrane|plasma membrane|integral component of membrane
Cse_sc000018.1_g070.1	0	4.17848	Inf	0.0201045	Up
Cse_sc000019.1_g020.1	203.91	78.7113	0.386011	0.000253439	Down
Cse_sc000019.1_g040.1	611.039	53.6893	0.0878656	3.32595e-22	Down		3-hydroxy-3-methylglutaryl-coenzyme A reductase	GO:0004420,GO:0005789,GO:0008299,GO:0015936,GO:0016021,GO:0050661	hydroxymethylglutaryl-CoA reductase (NADPH) activity|endoplasmic reticulum membrane|isoprenoid biosynthetic process|coenzyme A metabolic process|integral component of membrane|NADP binding
Cse_sc000025.1_g080.1	502.084	1149.75	2.28996	0.000110443	Up	SCPL18	Serine carboxypeptidase-like 18	GO:0004185,GO:0005576,GO:0019748	serine-type carboxypeptidase activity|extracellular region|secondary metabolic process
Cse_sc000026.1_g020.1	35.9396	17.5757	0.489033	0.0341454	Down	KIN14S	Kinesin-like protein KIN-14S	GO:0003777,GO:0005524,GO:0005871,GO:0005874,GO:0007018,GO:0008017,GO:0016887	microtubule motor activity|ATP binding|kinesin complex|microtubule|microtubule-based movement|microtubule binding|ATPase activity
Cse_sc000026.1_g170.1	200.88	2134.54	10.6259	7.08799e-13	Up	HIPP05	Heavy metal-associated isoprenylated plant protein 5	GO:0005507,GO:0030001	copper ion binding|metal ion transport
Cse_sc000027.1_g070.1	267.425	44.3068	0.165679	1.71963e-12	Down	WIP5	Zinc finger protein WIP5	GO:0003676,GO:0003700,GO:0005634,GO:0006355,GO:0010468,GO:0046872	nucleic acid binding|DNA-binding transcription factor activity|nucleus|regulation of transcription, DNA-templated|regulation of gene expression|metal ion binding
Cse_sc000028.1_g020.1	12.6553	0.377723	0.029847	4.78955e-05	Down	GIS	Zinc finger protein GIS	GO:0003676,GO:0003700,GO:0005634,GO:0006355,GO:0007275,GO:0009739,GO:0009740,GO:0010026,GO:0010091,GO:0046872	nucleic acid binding|DNA-binding transcription factor activity|nucleus|regulation of transcription, DNA-templated|multicellular organism development|response to gibberellin|gibberellic acid mediated signaling pathway|trichome differentiation|trichome branching|metal ion binding
Cse_sc000030.1_g060.1	24.0536	0.330986	0.0137604	8.14583e-09	Down	At3g57050	Cystathionine beta-lyase, chloroplastic	GO:0004121,GO:0005737,GO:0009507,GO:0009570,GO:0019279,GO:0019343,GO:0019346,GO:0030170,GO:0071266	cystathionine beta-lyase activity|cytoplasm|chloroplast|chloroplast stroma|L-methionine biosynthetic process from L-homoserine via cystathionine|cysteine biosynthetic process via cystathionine|transsulfuration|pyridoxal phosphate binding|'de novo' L-methionine biosynthetic process
Cse_sc000031.1_g040.1	65.7978	23.774	0.361319	0.00057147	Down
Cse_sc000031.1_g090.1	314.65	1016.37	3.23017	1.88847e-07	Up	ABCB26	ABC transporter B family member 26, chloroplastic	GO:0005215,GO:0005524,GO:0009507,GO:0009941,GO:0016021,GO:0031969,GO:0042626	transporter activity|ATP binding|chloroplast|chloroplast envelope|integral component of membrane|chloroplast membrane|ATPase activity, coupled to transmembrane movement of substances
Cse_sc000031.1_g100.1	739.303	3313.75	4.48227	1.5197e-11	Up
Cse_sc000031.1_g110.1	605.895	134.554	0.222075	0.00086209	Down	PP2B15	F-box protein PP2-B15	GO:0030246	carbohydrate binding
Cse_sc000033.1_g080.1	35.5958	10.9543	0.307741	0.0182279	Down	HSP17.4B	17.4 kDa class III heat shock protein	GO:0000302,GO:0005737,GO:0006457,GO:0009408,GO:0009644,GO:0009651,GO:0042542,GO:0043621,GO:0051082,GO:0051259	response to reactive oxygen species|cytoplasm|protein folding|response to heat|response to high light intensity|response to salt stress|response to hydrogen peroxide|protein self-association|unfolded protein binding|protein complex oligomerization
Cse_sc000035.1_g070.1	60.1571	20.5669	0.341887	0.0167233	Down	At2g39360	Probable receptor-like protein kinase At2g39360
Cse_sc000037.1_g030.1	360.831	1368.83	3.79356	0.000145007	Up	ATL54	RING-H2 finger protein ATL54	GO:0016021,GO:0016567,GO:0016740,GO:0046872	integral component of membrane|protein ubiquitination|transferase activity|metal ion binding
Cse_sc000037.1_g080.1	180.782	387.012	2.14077	0.000854799	Up	ABCC4	ABC transporter C family member 4	GO:0000325,GO:0005524,GO:0005773,GO:0005774,GO:0005794,GO:0005886,GO:0006855,GO:0008559,GO:0009414,GO:0009506,GO:0009611,GO:0009624,GO:0010118,GO:0016020,GO:0016021,GO:0042626,GO:0055085	plant-type vacuole|ATP binding|vacuole|vacuolar membrane|Golgi apparatus|plasma membrane|drug transmembrane transport|xenobiotic transmembrane transporting ATPase activity|response to water deprivation|plasmodesma|response to wounding|response to nematode|stomatal movement|membrane|integral component of membrane|ATPase activity, coupled to transmembrane movement of substances|transmembrane transp…
Cse_sc000037.1_g120.1	1491.08	3675.02	2.46467	2.94776e-05	Up	PHOS34	Universal stress protein PHOS34	GO:0002238,GO:0005524,GO:0009507	response to molecule of fungal origin|ATP binding|chloroplast
Cse_sc000039.1_g050.1	897.536	16.5216	0.0184077	2.37143e-11	Down	ROPGEF12	Rop guanine nucleotide exchange factor 12	GO:0005089,GO:0005737,GO:0005886,GO:0009793,GO:0009860,GO:0080092,GO:0090406	Rho guanyl-nucleotide exchange factor activity|cytoplasm|plasma membrane|embryo development ending in seed dormancy|pollen tube growth|regulation of pollen tube growth|pollen tube
Cse_sc000040.1_g040.1	188.675	4.41599	0.0234053	1.19482e-09	Down	At2g41970	Probable protein kinase At2g41970
Cse_sc000041.1_g010.1	16.8064	44.3895	2.64122	0.0320058	Up	At2g23200	Probable receptor-like protein kinase At2g23200
Cse_sc000042.1_g060.1	629.191	1749.35	2.78031	2.56441e-06	Up	At1g32780	Alcohol dehydrogenase-like 3	GO:0004022,GO:0005737,GO:0008270	alcohol dehydrogenase (NAD) activity|cytoplasm|zinc ion binding
Cse_sc000043.1_g030.1	68.6266	9.19885	0.134042	9.39042e-09	Down	HIPP07	Heavy metal-associated isoprenylated plant protein 7	GO:0005886,GO:0030001,GO:0046914,GO:0046916	plasma membrane|metal ion transport|transition metal ion binding|cellular transition metal ion homeostasis
Cse_sc000044.1_g030.1	0.32946	5.38191	16.3355	0.0187652	Up		Auxin-induced protein PCNT115	GO:0009734,GO:0016491	auxin-activated signaling pathway|oxidoreductase activity
Cse_sc000044.1_g080.1	70.5255	326.178	4.62497	3.85097e-10	Up	NAC073	NAC domain-containing protein 73	GO:0003700,GO:0005634,GO:0043565,GO:0044212,GO:0045893,GO:2000652	DNA-binding transcription factor activity|nucleus|sequence-specific DNA binding|transcription regulatory region DNA binding|positive regulation of transcription, DNA-templated|regulation of secondary cell wall biogenesis
Cse_sc000044.1_g140.1	789.994	68.2978	0.0864537	1.03387e-08	Down	OMT3	Probable O-methyltransferase 3	GO:0008171,GO:0046983	O-methyltransferase activity|protein dimerization activity
Cse_sc000044.1_g170.1	157.245	2.02364	0.0128693	1.18505e-06	Down	RABA1F	Ras-related protein RABA1f	GO:0003924,GO:0005525,GO:0005768,GO:0005886,GO:0006886,GO:0032482	GTPase activity|GTP binding|endosome|plasma membrane|intracellular protein transport|Rab protein signal transduction
Cse_sc000047.1_g010.1	31.9638	1.65493	0.0517752	1.77872e-08	Down	PUB23	E3 ubiquitin-protein ligase PUB23	GO:0004842,GO:0005829,GO:0006952,GO:0009414,GO:0010200,GO:0016567,GO:0051865	ubiquitin-protein transferase activity|cytosol|defense response|response to water deprivation|response to chitin|protein ubiquitination|protein autoubiquitination
Cse_sc000050.1_g150.1	25.2123	1.83287	0.0726971	9.54569e-07	Down	FAAH	Fatty acid amide hydrolase	GO:0004040,GO:0005773,GO:0005774,GO:0005783,GO:0005789,GO:0005794,GO:0005886,GO:0016021,GO:0042742,GO:0047412,GO:0070291,GO:0102077,GO:0103073	amidase activity|vacuole|vacuolar membrane|endoplasmic reticulum|endoplasmic reticulum membrane|Golgi apparatus|plasma membrane|integral component of membrane|defense response to bacterium|N-(long-chain-acyl)ethanolamine deacylase activity|N-acylethanolamine metabolic process|oleamide hydrolase activity|anandamide amidohydrolase activity
Cse_sc000050.1_g230.1	1431.25	2869.1	2.0046	0.00733294	Up	MAPKKK3	Mitogen-activated protein kinase kinase kinase 3	GO:0004674,GO:0004709,GO:0005524,GO:0005737,GO:0023014,GO:0031098,GO:0032147	protein serine/threonine kinase activity|MAP kinase kinase kinase activity|ATP binding|cytoplasm|signal transduction by protein phosphorylation|stress-activated protein kinase signaling cascade|activation of protein kinase activity
Cse_sc000051.1_g260.1	1.63963	10.233	6.24108	0.00828416	Up	RPS13	Ribosomal protein S13, mitochondrial	GO:0003735,GO:0005739,GO:0005840,GO:0006412,GO:0019843	structural constituent of ribosome|mitochondrion|ribosome|translation|rRNA binding
Cse_sc000051.1_g270.1	43.3265	89.6514	2.06921	0.0336874	Up	At5g38990	Probable receptor-like protein kinase At5g38990
Cse_sc000052.1_g010.1	7.43536	0	0	0.00106642	Down	RD22	BURP domain protein RD22	GO:0005768,GO:0005794,GO:0005802,GO:0009651	endosome|Golgi apparatus|trans-Golgi network|response to salt stress
Cse_sc000052.1_g090.1	32.9789	227.696	6.90428	4.00051e-08	Up
Cse_sc000052.1_g140.1	80.1632	30.6743	0.382648	0.0015752	Down	EMS1	Leucine-rich repeat receptor protein kinase EMS1
Cse_sc000054.1_g070.1	12.6568	29.3877	2.3219	0.023954	Up
Cse_sc000056.1_g050.1	73.1087	151.481	2.07199	0.00373421	Up	PNA	Dammarenediol II synthase	GO:0016021,GO:0016829,GO:0016866	integral component of membrane|lyase activity|intramolecular transferase activity
Cse_sc000059.1_g030.1	115.484	46.8554	0.40573	0.000647358	Down	RLP35	Receptor-like protein 35	GO:0005886,GO:0016021	plasma membrane|integral component of membrane
Cse_sc000063.1_g080.1	41.0168	85.6333	2.08776	0.00865392	Up
Cse_sc000063.1_g120.1	64.3944	0	0	9.33459e-08	Down	PBL23	Probable serine/threonine-protein kinase PBL23
Cse_sc000064.1_g050.1	153.99	15.3055	0.0993929	0.000751764	Down
Cse_sc000064.1_g070.1	13.7132	3.1478	0.229546	0.0102649	Down	At1g49405	CASP-like protein 5C3	GO:0005886,GO:0016021	plasma membrane|integral component of membrane
Cse_sc000064.1_g080.1	24.6957	5.6014	0.226817	0.00223166	Down	At5g66560	BTB/POZ domain-containing protein At5g66560	GO:0005886,GO:0016567	plasma membrane|protein ubiquitination
Cse_sc000064.1_g090.1	12.6058	1.39939	0.111012	0.00152801	Down
Cse_sc000067.1_g030.1	466.037	102.398	0.21972	0.000895423	Down	MAPKKK18	Mitogen-activated protein kinase kinase kinase 18	GO:0004672,GO:0004674,GO:0004709,GO:0005524,GO:0005634,GO:0005737,GO:0006970,GO:0009737,GO:0009738,GO:0009789,GO:0023014,GO:0031098,GO:0032147,GO:0046777,GO:1900057,GO:1902457,GO:2000038	protein kinase activity|protein serine/threonine kinase activity|MAP kinase kinase kinase activity|ATP binding|nucleus|cytoplasm|response to osmotic stress|response to abscisic acid|abscisic acid-activated signaling pathway|positive regulation of abscisic acid-activated signaling pathway|signal transduction by protein phosphorylation|stress-activated protein kinase signaling cascade|activation of…
Cse_sc000067.1_g060.1	22.6326	0.321973	0.0142261	0.000188792	Down	WRKY6	WRKY transcription factor 6	GO:0003700,GO:0005634,GO:0009873,GO:0010200,GO:0016036,GO:0043565,GO:0044212,GO:0045892,GO:0080169	DNA-binding transcription factor activity|nucleus|ethylene-activated signaling pathway|response to chitin|cellular response to phosphate starvation|sequence-specific DNA binding|transcription regulatory region DNA binding|negative regulation of transcription, DNA-templated|cellular response to boron-containing substance deprivation
Cse_sc000071.1_g030.1	150.47	1.64592	0.0109385	8.07014e-06	Down	CXE9	Probable carboxylesterase 9	GO:0052689	carboxylic ester hydrolase activity
Cse_sc000071.1_g040.1	46.803	13.9871	0.29885	0.0431719	Down	SYT4	Synaptotagmin-4	GO:0005783,GO:0006869,GO:0008289,GO:0016021,GO:0046872	endoplasmic reticulum|lipid transport|lipid binding|integral component of membrane|metal ion binding
Cse_sc000071.1_g050.1	8.81158	23.5346	2.67087	0.0214969	Up
Cse_sc000071.1_g080.1	374.519	53.1278	0.141856	7.1106e-06	Down	BCHC2	BEACH domain-containing protein C2
Cse_sc000071.1_g090.1	21.0402	95.5206	4.53992	1.82909e-07	Up	HERK1	Receptor-like protein kinase HERK 1
Cse_sc000074.1_g100.1	27.1593	6.24886	0.230082	0.0209602	Down	SAUR50	Auxin-responsive protein SAUR50	GO:0009734,GO:0040008	auxin-activated signaling pathway|regulation of growth
Cse_sc000075.1_g040.1	381.756	2801.54	7.33857	9.16653e-08	Up	ACS1	1-aminocyclopropane-1-carboxylate synthase	GO:0009693,GO:0009835,GO:0016847,GO:0030170	ethylene biosynthetic process|fruit ripening|1-aminocyclopropane-1-carboxylate synthase activity|pyridoxal phosphate binding
Cse_sc000075.1_g070.1	66.8634	1502.66	22.4736	8.47301e-35	Up	HIPP39	Heavy metal-associated isoprenylated plant protein 39	GO:0030001,GO:0046872	metal ion transport|metal ion binding
Cse_sc000075.1_g080.1	20.0818	2.30956	0.115008	0.000270356	Down
Cse_sc000076.1_g020.1	225.897	516.932	2.28835	0.000303822	Up	RAP2-3	Ethylene-responsive transcription factor RAP2-3	GO:0003677,GO:0003700,GO:0005634,GO:0005737,GO:0005886,GO:0008219,GO:0009723,GO:0009735,GO:0009753,GO:0009873,GO:0010286,GO:0043565,GO:0045893,GO:0051707	DNA binding|DNA-binding transcription factor activity|nucleus|cytoplasm|plasma membrane|cell death|response to ethylene|response to cytokinin|response to jasmonic acid|ethylene-activated signaling pathway|heat acclimation|sequence-specific DNA binding|positive regulation of transcription, DNA-templated|response to other organism
Cse_sc000076.1_g130.1	30.8401	113.404	3.67717	0.000216116	Up	SAUR50	Auxin-responsive protein SAUR50	GO:0009734,GO:0040008	auxin-activated signaling pathway|regulation of growth
Cse_sc000077.1_g060.1	338.637	90.6892	0.267807	2.63421e-08	Down
Cse_sc000080.1_g010.1	3.25207	20.5649	6.32364	0.0246282	Up	CET1	CEN-like protein 1	GO:0005737	cytoplasm
Cse_sc000080.1_g080.1	11.1621	2.30789	0.206762	0.0178415	Down	GAUT12	Probable galacturonosyltransferase 12	GO:0000139,GO:0005794,GO:0010413,GO:0010417,GO:0016021,GO:0045489,GO:0045492,GO:0047262,GO:0071555	Golgi membrane|Golgi apparatus|glucuronoxylan metabolic process|glucuronoxylan biosynthetic process|integral component of membrane|pectin biosynthetic process|xylan biosynthetic process|polygalacturonate 4-alpha-galacturonosyltransferase activity|cell wall organization
Cse_sc000081.1_g030.1	401.517	844.652	2.10365	0.000655392	Up	HEMH	Ferrochelatase-2, chloroplastic	GO:0004325,GO:0006783,GO:0009507	ferrochelatase activity|heme biosynthetic process|chloroplast
Cse_sc000082.1_g010.1	12.5222	2.05235	0.163897	0.00515632	Down	TAF15	Transcription initiation factor TFIID subunit 15	GO:0003723,GO:0005634,GO:0046872	RNA binding|nucleus|metal ion binding
Cse_sc000082.1_g020.1	260.573	15.4764	0.0593939	2.35942e-09	Down	CIPK1	CBL-interacting serine/threonine-protein kinase 1	GO:0004674,GO:0005524,GO:0005634,GO:0005737,GO:0005886,GO:0006468,GO:0006970,GO:0009651,GO:0009737,GO:0035556	protein serine/threonine kinase activity|ATP binding|nucleus|cytoplasm|plasma membrane|protein phosphorylation|response to osmotic stress|response to salt stress|response to abscisic acid|intracellular signal transduction
Cse_sc000082.1_g090.1	45.5563	110.197	2.41892	0.000926939	Up
Cse_sc000082.1_g120.1	506.849	1127.76	2.22504	0.00161186	Up	ARF19	Auxin response factor 19	GO:0003677,GO:0003700,GO:0005634,GO:0009723,GO:0009733,GO:0009734,GO:0010311,GO:0043565,GO:0046983,GO:0048366,GO:0048527	DNA binding|DNA-binding transcription factor activity|nucleus|response to ethylene|response to auxin|auxin-activated signaling pathway|lateral root formation|sequence-specific DNA binding|protein dimerization activity|leaf development|lateral root development
Cse_sc000082.1_g140.1	99.8203	4.12273	0.0413015	1.58166e-07	Down	PRK6	Pollen receptor-like kinase 6
Cse_sc000082.1_g170.1	342.879	33.2316	0.0969191	1.48028e-19	Down	SBT1.8	Subtilisin-like protease SBT1.8	GO:0004252,GO:0005576,GO:0005618,GO:0005794,GO:0009505,GO:0009506	serine-type endopeptidase activity|extracellular region|cell wall|Golgi apparatus|plant-type cell wall|plasmodesma
Cse_sc000083.1_g050.1	170.638	520.209	3.04861	1.06965e-06	Up	ISE2	DExH-box ATP-dependent RNA helicase DExH15 chloroplastic	GO:0000373,GO:0003723,GO:0003724,GO:0005524,GO:0006397,GO:0009507,GO:0009570,GO:0009793,GO:0010494,GO:0010497,GO:0016441,GO:0031047	Group II intron splicing|RNA binding|RNA helicase activity|ATP binding|mRNA processing|chloroplast|chloroplast stroma|embryo development ending in seed dormancy|cytoplasmic stress granule|plasmodesmata-mediated intercellular transport|posttranscriptional gene silencing|gene silencing by RNA
Cse_sc000088.1_g130.1	34.2529	585.659	17.0981	1.94342e-14	Up	MAP70.5	Microtubule-associated protein 70-5	GO:0005737,GO:0005874,GO:0007010,GO:0008017,GO:0009832,GO:0010051,GO:0071555	cytoplasm|microtubule|cytoskeleton organization|microtubule binding|plant-type cell wall biogenesis|xylem and phloem pattern formation|cell wall organization
Cse_sc000089.1_g050.1	39.6844	117.253	2.95465	0.00113303	Up	At1g56130	Probable LRR receptor-like serine/threonine-protein kinase At1g56130
Cse_sc000089.1_g070.1	7.0636	39.594	5.60536	6.81806e-06	Up	SMR13	Cyclin-dependent protein kinase inhibitor SMR13	GO:0004860,GO:0005634,GO:0007049,GO:0045786,GO:0045839	protein kinase inhibitor activity|nucleus|cell cycle|negative regulation of cell cycle|negative regulation of mitotic nuclear division
Cse_sc000089.1_g100.1	132.453	49.1835	0.371329	0.00174488	Down	RBCX2	Chaperonin-like RbcX protein 2, chloroplastic	GO:0009570,GO:0044183,GO:0061077	chloroplast stroma|protein binding involved in protein folding|chaperone-mediated protein folding
Cse_sc000089.1_g120.1	98.1305	0.643946	0.00656213	2.60646e-07	Down		Mavicyanin	GO:0009055,GO:0046872	electron transfer activity|metal ion binding
Cse_sc000090.1_g070.1	20.5977	61.569	2.98912	0.000528048	Up	FER	Receptor-like protein kinase FERONIA
Cse_sc000090.1_g110.1	26.1829	8.25096	0.315127	0.0073348	Down	FER	Receptor-like protein kinase FERONIA
Cse_sc000090.1_g120.1	474.62	99.9026	0.210489	2.91398e-11	Down	SP1L1	Protein SPIRAL1-like 1	GO:0010005,GO:0043622	cortical microtubule, transverse to long axis|cortical microtubule organization
Cse_sc000091.1_g010.1	90.6532	247.307	2.72806	2.73119e-05	Up	CYP734A1	Cytochrome P450 734A1	GO:0004497,GO:0005506,GO:0008395,GO:0009741,GO:0010268,GO:0016021,GO:0016131,GO:0016705,GO:0020037,GO:0040008	monooxygenase activity|iron ion binding|steroid hydroxylase activity|response to brassinosteroid|brassinosteroid homeostasis|integral component of membrane|brassinosteroid metabolic process|oxidoreductase activity, acting on paired donors, with incorporation or reduction of molecular oxygen|heme binding|regulation of growth
Cse_sc000091.1_g060.1	33.8966	84.3585	2.4887	0.0281831	Up	At5g45960	GDSL esterase/lipase At5g45960	GO:0005576,GO:0016042,GO:0016788	extracellular region|lipid catabolic process|hydrolase activity, acting on ester bonds
Cse_sc000092.1_g070.1	88.088	6.04907	0.0686708	0.03804	Down
Cse_sc000092.1_g080.1	1603.95	629.673	0.392576	1.49812e-05	Down	CAB13	Chlorophyll a-b binding protein 13, chloroplastic	GO:0009416,GO:0009522,GO:0009523,GO:0009535,GO:0009768,GO:0009941,GO:0010287,GO:0016021,GO:0016168,GO:0018298,GO:0046872	response to light stimulus|photosystem I|photosystem II|chloroplast thylakoid membrane|photosynthesis, light harvesting in photosystem I|chloroplast envelope|plastoglobule|integral component of membrane|chlorophyll binding|protein-chromophore linkage|metal ion binding
Cse_sc000092.1_g110.1	5.49223	0	0	0.0065881	Down	OsI_019426	Histone H3.2	GO:0000786,GO:0003677,GO:0005634,GO:0046982	nucleosome|DNA binding|nucleus|protein heterodimerization activity
Cse_sc000092.1_g120.1	105.768	939.199	8.87979	3.41327e-18	Up	CCD4	Probable carotenoid cleavage dioxygenase 4, chloroplastic	GO:0009507,GO:0009570,GO:0010287,GO:0010436,GO:0016121,GO:0045549,GO:0046872	chloroplast|chloroplast stroma|plastoglobule|carotenoid dioxygenase activity|carotene catabolic process|9-cis-epoxycarotenoid dioxygenase activity|metal ion binding
Cse_sc000093.1_g010.1	820.618	2900.38	3.53438	3.79466e-08	Up	HIPP39	Heavy metal-associated isoprenylated plant protein 39	GO:0030001,GO:0046872	metal ion transport|metal ion binding
Cse_sc000095.1_g100.1	36.899	6.27757	0.170128	1.11665e-05	Down	N	TMV resistance protein N	GO:0005524,GO:0005737,GO:0007165,GO:0009626,GO:0043531	ATP binding|cytoplasm|signal transduction|plant-type hypersensitive response|ADP binding
Cse_sc000095.1_g140.1	51.6869	124.606	2.41079	0.0007875	Up	TCP2	Transcription factor TCP2	GO:0003700,GO:0005634,GO:0006355,GO:0009637,GO:0009965,GO:0030154,GO:0043565,GO:0045962,GO:0048366,GO:1903508,GO:2000306	DNA-binding transcription factor activity|nucleus|regulation of transcription, DNA-templated|response to blue light|leaf morphogenesis|cell differentiation|sequence-specific DNA binding|positive regulation of development, heterochronic|leaf development|positive regulation of nucleic acid-templated transcription|positive regulation of photomorphogenesis
Cse_sc000097.1_g040.1	168.993	0.321973	0.00190524	1.79558e-11	Down
Cse_sc000098.1_g130.1	39.2285	643.477	16.4033	9.37528e-12	Up	IAA13	Auxin-responsive protein IAA13	GO:0003700,GO:0005634,GO:0009733,GO:0009734	DNA-binding transcription factor activity|nucleus|response to auxin|auxin-activated signaling pathway
Cse_sc000098.1_g150.1	72.8134	171.527	2.35571	0.00050817	Up
Cse_sc000102.1_g110.1	29.7325	398.193	13.3925	1.75584e-18	Up	J	MADS-box protein JOINTLESS	GO:0000977,GO:0000982,GO:0005634,GO:0007275,GO:0008134,GO:0043565,GO:0044212,GO:0045944,GO:0046983	RNA polymerase II regulatory region sequence-specific DNA binding|transcription factor activity, RNA polymerase II proximal promoter sequence-specific DNA binding|nucleus|multicellular organism development|transcription factor binding|sequence-specific DNA binding|transcription regulatory region DNA binding|positive regulation of transcription by RNA polymerase II|protein dimerization activity
Cse_sc000103.1_g090.1	2.78829	29.332	10.5197	1.24343e-06	Up
Cse_sc000103.1_g140.1	4.22436	22.799	5.39704	0.00195359	Up
Cse_sc000104.1_g090.1	3388.87	138.087	0.040747	1.84854e-13	Down
Cse_sc000108.1_g010.1	5.2125	20.9067	4.01088	0.0170345	Up
Cse_sc000108.1_g150.1	5.26345	79.6796	15.1383	5.95376e-14	Up	BSPA	Bark storage protein A	GO:0003824,GO:0009116,GO:0045735	catalytic activity|nucleoside metabolic process|nutrient reservoir activity
Cse_sc000110.1_g070.1	60.3513	2.66759	0.044201	2.27351e-13	Down	MAKR2	Probable membrane-associated kinase regulator 2	GO:0005886	plasma membrane
Cse_sc000112.1_g050.1	3.77667	0	0	0.0325165	Down
Cse_sc000113.1_g030.1	37.8761	99.806	2.63507	0.0339083	Up	STIPL2	Septin and tuftelin-interacting protein 1 homolog 2	GO:0000390,GO:0003677,GO:0071008	spliceosomal complex disassembly|DNA binding|U2-type post-mRNA release spliceosomal complex
Cse_sc000113.1_g110.1	4.15708	0	0	0.0231973	Down
Cse_sc000113.1_g130.1	6.22685	0	0	0.00289892	Down	At1g65750	Putative ribonuclease H protein At1g65750	GO:0003676,GO:0004523,GO:0046872	nucleic acid binding|RNA-DNA hybrid ribonuclease activity|metal ion binding
Cse_sc000116.1_g090.1	103.25	611.943	5.92679	0.0466202	Up	NPF5.6	Protein NRT1/ PTR FAMILY 5.6	GO:0015333,GO:0016021,GO:0035673,GO:1904680	peptide:proton symporter activity|integral component of membrane|oligopeptide transmembrane transporter activity|peptide transmembrane transporter activity
Cse_sc000117.1_g030.1	8.34635	0	0	0.0498378	Down		Cucumisin	GO:0004252,GO:0005576	serine-type endopeptidase activity|extracellular region
Cse_sc000118.1_g010.1	130.568	31.8647	0.244046	1.54927e-07	Down	ERF110	Ethylene-responsive transcription factor ERF110	GO:0003677,GO:0003700,GO:0005634,GO:0009873,GO:0045893,GO:0048510	DNA binding|DNA-binding transcription factor activity|nucleus|ethylene-activated signaling pathway|positive regulation of transcription, DNA-templated|regulation of timing of transition from vegetative to reproductive phase
Cse_sc000118.1_g050.1	229.329	739.416	3.22426	0.00952284	Up
Cse_sc000118.1_g090.1	81.1043	246.775	3.04269	3.27139e-06	Up	TAR4	Tryptophan aminotransferase-related protein 4	GO:0008483,GO:0016021,GO:0016846	transaminase activity|integral component of membrane|carbon-sulfur lyase activity
Cse_sc000119.1_g080.1	631.457	37.9374	0.0600792	1.62096e-20	Down	At5g01610	Uncharacterized protein At5g01610
Cse_sc000119.1_g120.1	1500.92	482.065	0.321179	2.55976e-07	Down	At3g03300	Endoribonuclease Dicer homolog 2	GO:0003723,GO:0004386,GO:0004525,GO:0005524,GO:0005634,GO:0005737,GO:0010216,GO:0010267,GO:0016442,GO:0030422,GO:0046872,GO:0051214	RNA binding|helicase activity|ribonuclease III activity|ATP binding|nucleus|cytoplasm|maintenance of DNA methylation|production of ta-siRNAs involved in RNA interference|RISC complex|production of siRNA involved in RNA interference|metal ion binding|RNA virus induced gene silencing
Cse_sc000122.1_g030.1	302.622	63.8199	0.21089	2.78385e-09	Down	CAD6	Probable cinnamyl alcohol dehydrogenase 6	GO:0008270,GO:0009809,GO:0045551,GO:0052747	zinc ion binding|lignin biosynthetic process|cinnamyl-alcohol dehydrogenase activity|sinapyl alcohol dehydrogenase activity
Cse_sc000123.1_g030.1	6.32777	18.0953	2.85966	0.0289199	Up	At4g27190	Disease resistance protein At4g27190
Cse_sc000123.1_g150.1	16.3137	1.2969	0.0794977	0.000629705	Down	RD22	BURP domain protein RD22	GO:0005768,GO:0005794,GO:0005802,GO:0009651	endosome|Golgi apparatus|trans-Golgi network|response to salt stress
Cse_sc000123.1_g160.1	59.1918	1.31493	0.0222148	1.11184e-06	Down		Retrovirus-related Pol polyprotein from transposon TNT 1-94	GO:0000943,GO:0003676,GO:0003964,GO:0004190,GO:0004519,GO:0008270,GO:0015074	retrotransposon nucleocapsid|nucleic acid binding|RNA-directed DNA polymerase activity|aspartic-type endopeptidase activity|endonuclease activity|zinc ion binding|DNA integration
Cse_sc000127.1_g010.1	53.9452	229.619	4.25653	1.21339e-08	Up	CXE1	Carboxylesterase 1	GO:0052689	carboxylic ester hydrolase activity
Cse_sc000130.1_g030.1	170.37	26.7217	0.156845	7.04176e-05	Down	CBSX5	CBS domain-containing protein CBSX5
Cse_sc000131.1_g130.1	72.7076	8.03499	0.110511	1.39192e-10	Down	CRLK1	Calcium/calmodulin-regulated receptor-like kinase 1	GO:0004674,GO:0004675,GO:0005516,GO:0005524,GO:0005886,GO:0006468,GO:0009409,GO:0009631,GO:0010008,GO:0016021	protein serine/threonine kinase activity|transmembrane receptor protein serine/threonine kinase activity|calmodulin binding|ATP binding|plasma membrane|protein phosphorylation|response to cold|cold acclimation|endosome membrane|integral component of membrane
Cse_sc000132.1_g010.1	56.8322	4.86916	0.0856762	1.62642e-10	Down	PUB45	U-box domain-containing protein 45	GO:0004842,GO:0005634,GO:0005737,GO:0016567,GO:0070696	ubiquitin-protein transferase activity|nucleus|cytoplasm|protein ubiquitination|transmembrane receptor protein serine/threonine kinase binding
Cse_sc000132.1_g090.1	8.22859	26.1358	3.17621	0.00544591	Up
Cse_sc000132.1_g120.1	48.8966	100.167	2.04855	0.00677062	Up	GAPN	NADP-dependent glyceraldehyde-3-phosphate dehydrogenase	GO:0005737,GO:0008886	cytoplasm|glyceraldehyde-3-phosphate dehydrogenase (NADP+) (non-phosphorylating) activity
Cse_sc000133.1_g050.1	3729.19	1677.88	0.449931	0.00019024	Down	cao1	Copper amine oxidase 1	GO:0005507,GO:0005737,GO:0005829,GO:0006878,GO:0008131,GO:0009308,GO:0009310,GO:0042764,GO:0048038,GO:0052593,GO:0052594,GO:0052595,GO:0052596,GO:1990748	copper ion binding|cytoplasm|cytosol|cellular copper ion homeostasis|primary amine oxidase activity|amine metabolic process|amine catabolic process|ascospore-type prospore|quinone binding|tryptamine:oxygen oxidoreductase (deaminating) activity|aminoacetone:oxygen oxidoreductase(deaminating) activity|aliphatic-amine oxidase activity|phenethylamine:oxygen oxidoreductase (deaminating) activity|cellu…
Cse_sc000133.1_g070.1	121.531	286.575	2.35803	0.00418722	Up
Cse_sc000134.1_g070.1	25.5559	65.8577	2.577	0.00159579	Up	TTM3	Triphosphate tunel metalloenzyme 3	GO:0005524,GO:0005634,GO:0016887,GO:0048364,GO:0050355	ATP binding|nucleus|ATPase activity|root development|triphosphatase activity
Cse_sc000134.1_g080.1	24.3818	4.63548	0.19012	0.00161996	Down	cnd1	Condensin complex subunit 1	GO:0000778,GO:0000779,GO:0000799,GO:0003682,GO:0005634,GO:0005730,GO:0005737,GO:0007076,GO:0010032,GO:0035327,GO:0042393,GO:0051301,GO:0051304	condensed nuclear chromosome kinetochore|condensed chromosome, centromeric region|nuclear condensin complex|chromatin binding|nucleus|nucleolus|cytoplasm|mitotic chromosome condensation|meiotic chromosome condensation|transcriptionally active chromatin|histone binding|cell division|chromosome separation
Cse_sc000134.1_g120.1	19.4228	41.1861	2.1205	0.0281608	Up	At5g02910	F-box/LRR-repeat protein At5g02910
Cse_sc000138.1_g100.1	44.7744	143.741	3.21035	0.000279567	Up	ABCC3	ABC transporter C family member 3	GO:0000325,GO:0005524,GO:0005773,GO:0005774,GO:0008559,GO:0009506,GO:0010290,GO:0015431,GO:0016020,GO:0016021,GO:0042626,GO:0048046,GO:0055085	plant-type vacuole|ATP binding|vacuole|vacuolar membrane|xenobiotic transmembrane transporting ATPase activity|plasmodesma|chlorophyll catabolite transmembrane transporter activity|glutathione S-conjugate-exporting ATPase activity|membrane|integral component of membrane|ATPase activity, coupled to transmembrane movement of substances|apoplast|transmembrane transport
Cse_sc000139.1_g090.1	12.5794	0	0	6.48583e-05	Down	XLT2	Xyloglucan galactosyltransferase XLT2	GO:0000139,GO:0005794,GO:0006486,GO:0008378,GO:0009969,GO:0016021	Golgi membrane|Golgi apparatus|protein glycosylation|galactosyltransferase activity|xyloglucan biosynthetic process|integral component of membrane
Cse_sc000139.1_g100.1	59.5383	25.8966	0.434957	0.00534776	Down	HOS15	WD40 repeat-containing protein HOS15	GO:0000118,GO:0003714,GO:0005634,GO:0006357,GO:0009409,GO:0016575,GO:0080008	histone deacetylase complex|transcription corepressor activity|nucleus|regulation of transcription by RNA polymerase II|response to cold|histone deacetylation|Cul4-RING E3 ubiquitin ligase complex
Cse_sc000141.1_g040.1	5.71979	0.643946	0.112582	0.040751	Down	MOD1	Enoyl-[acyl-carrier-protein] reductase [NADH], chloroplastic	GO:0004318,GO:0005507,GO:0005835,GO:0006633,GO:0009507,GO:0009570,GO:0009579,GO:0009941,GO:0016631	enoyl-[acyl-carrier-protein] reductase (NADH) activity|copper ion binding|fatty acid synthase complex|fatty acid biosynthetic process|chloroplast|chloroplast stroma|thylakoid|chloroplast envelope|enoyl-[acyl-carrier-protein] reductase activity
Cse_sc000142.1_g050.1	15.4188	0.755446	0.048995	2.41687e-05	Down
Cse_sc000145.1_g020.1	27.762	13.0769	0.471036	0.042663	Down
Cse_sc000146.1_g080.1	908.855	408.63	0.44961	0.00183013	Down	PAT21	Protein S-acyltransferase 21	GO:0005783,GO:0005794,GO:0005886,GO:0006612,GO:0016021,GO:0018230,GO:0019706	endoplasmic reticulum|Golgi apparatus|plasma membrane|protein targeting to membrane|integral component of membrane|peptidyl-L-cysteine S-palmitoylation|protein-cysteine S-palmitoyltransferase activity
Cse_sc000147.1_g030.1	900.907	2154.23	2.39118	0.023948	Up	At1g65240	Aspartic proteinase-like protein 2	GO:0004190,GO:0005886,GO:0006508,GO:0030163,GO:0031225,GO:0046658	aspartic-type endopeptidase activity|plasma membrane|proteolysis|protein catabolic process|anchored component of membrane|anchored component of plasma membrane
Cse_sc000147.1_g100.1	307.134	698.223	2.27335	0.000302807	Up
Cse_sc000148.1_g130.1	10.6701	26.8336	2.51484	0.019644	Up
Cse_sc000149.1_g050.1	111.339	665.757	5.97953	0.0418744	Up	ABCG36	ABC transporter G family member 36	GO:0005524,GO:0005739,GO:0005774,GO:0005886,GO:0006855,GO:0009507,GO:0009627,GO:0009737,GO:0009817,GO:0009941,GO:0015086,GO:0015691,GO:0016020,GO:0016021,GO:0031348,GO:0042344,GO:0042626,GO:0042742,GO:0052544,GO:0055085,GO:0071366	ATP binding|mitochondrion|vacuolar membrane|plasma membrane|drug transmembrane transport|chloroplast|systemic acquired resistance|response to abscisic acid|defense response to fungus, incompatible interaction|chloroplast envelope|cadmium ion transmembrane transporter activity|cadmium ion transport|membrane|integral component of membrane|negative regulation of defense response|indole glucosinolate…
Cse_sc000149.1_g070.1	909.507	85.7448	0.0942761	1.24713e-19	Down	ABCG36	ABC transporter G family member 36	GO:0005524,GO:0005739,GO:0005774,GO:0005886,GO:0006855,GO:0009507,GO:0009627,GO:0009737,GO:0009817,GO:0009941,GO:0015086,GO:0015691,GO:0016020,GO:0016021,GO:0031348,GO:0042344,GO:0042626,GO:0042742,GO:0052544,GO:0055085,GO:0071366	ATP binding|mitochondrion|vacuolar membrane|plasma membrane|drug transmembrane transport|chloroplast|systemic acquired resistance|response to abscisic acid|defense response to fungus, incompatible interaction|chloroplast envelope|cadmium ion transmembrane transporter activity|cadmium ion transport|membrane|integral component of membrane|negative regulation of defense response|indole glucosinolate…
Cse_sc000150.1_g030.1	508.296	226.247	0.445109	0.000372667	Down
Cse_sc000150.1_g070.1	4414.48	718.211	0.162695	3.32238e-06	Down	PRP4	Proline-rich protein 4	GO:0005576,GO:0005618	extracellular region|cell wall
Cse_sc000151.1_g040.1	44.9533	0.974932	0.0216877	2.23335e-06	Down	MYB52	Transcription factor MYB52	GO:0003677,GO:0003700,GO:0005634,GO:0009414,GO:0009737,GO:0009834,GO:0071555,GO:1901347,GO:1901348,GO:1902074,GO:2000652	DNA binding|DNA-binding transcription factor activity|nucleus|response to water deprivation|response to abscisic acid|plant-type secondary cell wall biogenesis|cell wall organization|negative regulation of secondary cell wall biogenesis|positive regulation of secondary cell wall biogenesis|response to salt|regulation of secondary cell wall biogenesis
Cse_sc000154.1_g010.1	0.287166	4.57423	15.9289	0.0436307	Up	At3g47570	Probable LRR receptor-like serine/threonine-protein kinase At3g47570
Cse_sc000155.1_g010.1	14.6172	39.7089	2.71659	0.033726	Up	At5g39000	Putative receptor-like protein kinase At5g39000	GO:0004672,GO:0004674,GO:0005524,GO:0005886,GO:0009506,GO:0016021,GO:0046777	protein kinase activity|protein serine/threonine kinase activity|ATP binding|plasma membrane|plasmodesma|integral component of membrane|protein autophosphorylation
Cse_sc000155.1_g030.1	15.8512	5.90886	0.372771	0.0440858	Down	RCOM_1202350	Arginine biosynthesis bifunctional protein ArgJ, chloroplastic	GO:0004042,GO:0004358,GO:0006526,GO:0009507,GO:0103045	acetyl-CoA:L-glutamate N-acetyltransferase activity|glutamate N-acetyltransferase activity|arginine biosynthetic process|chloroplast|methione N-acyltransferase activity
Cse_sc000155.1_g040.1	22.4654	63.4452	2.82413	0.0162414	Up	At5g38990	Probable receptor-like protein kinase At5g38990
Cse_sc000158.1_g010.1	273.568	63.9183	0.233647	2.82391e-09	Down	XI-F	Myosin-12	GO:0003774,GO:0003779,GO:0005516,GO:0005524,GO:0007015,GO:0016461,GO:0030048	motor activity|actin binding|calmodulin binding|ATP binding|actin filament organization|unconventional myosin complex|actin filament-based movement
Cse_sc000159.1_g050.1	1534.6	3576.68	2.33069	0.00126291	Up
Cse_sc000161.1_g030.1	3.63248	0	0	0.0345778	Down	FTSHI3	Probable inactive ATP-dependent zinc metalloprotease FTSHI 3, chloroplastic	GO:0004176,GO:0004222,GO:0005524,GO:0005739,GO:0006508,GO:0008270,GO:0009941,GO:0016021,GO:0031969	ATP-dependent peptidase activity|metalloendopeptidase activity|ATP binding|mitochondrion|proteolysis|zinc ion binding|chloroplast envelope|integral component of membrane|chloroplast membrane
Cse_sc000162.1_g030.1	270.998	1351.86	4.98845	8.71024e-13	Up	At3g47420	Putative glycerol-3-phosphate transporter 1	GO:0008643,GO:0016021,GO:0022857,GO:0055062	carbohydrate transport|integral component of membrane|transmembrane transporter activity|phosphate ion homeostasis
Cse_sc000162.1_g060.1	85.565	2.45711	0.0287163	8.59266e-05	Down	TIP5-1	Probable aquaporin TIP5-1	GO:0005739,GO:0015204,GO:0015250,GO:0015840,GO:0016021,GO:0048235,GO:0090406	mitochondrion|urea transmembrane transporter activity|water channel activity|urea transport|integral component of membrane|pollen sperm cell differentiation|pollen tube
Cse_sc000162.1_g100.1	33.4926	3.07402	0.091782	2.48666e-07	Down	HSC80	Heat shock cognate protein 80	GO:0005524,GO:0005737,GO:0006457,GO:0051082	ATP binding|cytoplasm|protein folding|unfolded protein binding
Cse_sc000162.1_g110.1	11.9976	0.755446	0.0629665	0.000325924	Down	HSP90-2	Heat shock protein 90-2	GO:0005524,GO:0005737,GO:0009816,GO:0016887,GO:0051082,GO:0061077	ATP binding|cytoplasm|defense response to bacterium, incompatible interaction|ATPase activity|unfolded protein binding|chaperone-mediated protein folding
Cse_sc000166.1_g010.1	1232.14	107.677	0.0873906	6.01752e-18	Down	COPT6	Copper transporter 6	GO:0005375,GO:0005773,GO:0016021	copper ion transmembrane transporter activity|vacuole|integral component of membrane
Cse_sc000169.1_g060.1	56.218	276.886	4.92523	0.00321849	Up	CXP	Serine carboxypeptidase II-3	GO:0004185	serine-type carboxypeptidase activity
Cse_sc000170.1_g100.1	39.0423	7.65375	0.196037	3.05468e-05	Down	CSLA9	Glucomannan 4-beta-mannosyltransferase 9	GO:0000139,GO:0009294,GO:0009617,GO:0016021,GO:0047259,GO:0051753,GO:0071555	Golgi membrane|DNA mediated transformation|response to bacterium|integral component of membrane|glucomannan 4-beta-mannosyltransferase activity|mannan synthase activity|cell wall organization
Cse_sc000171.1_g090.1	297.019	1605.53	5.40548	0.00131114	Up	EXO	Protein EXORDIUM	GO:0005615,GO:0005618,GO:0005794,GO:0009505,GO:0009741,GO:0048046	extracellular space|cell wall|Golgi apparatus|plant-type cell wall|response to brassinosteroid|apoplast
Cse_sc000172.1_g050.1	26.7489	3.41402	0.127632	1.61743e-05	Down	FGRAMPH1_01T20223	Acyl-protein thioesterase 1	GO:0005737,GO:0006631,GO:0052689	cytoplasm|fatty acid metabolic process|carboxylic ester hydrolase activity
Cse_sc000172.1_g080.1	78.7825	0.330986	0.00420127	1.835e-17	Down	GSTU25	Glutathione S-transferase U25	GO:0004364,GO:0005737,GO:0005829,GO:0006749,GO:0009407,GO:0046256	glutathione transferase activity|cytoplasm|cytosol|glutathione metabolic process|toxin catabolic process|2,4,6-trinitrotoluene catabolic process
Cse_sc000174.1_g020.1	1.33515	55.4305	41.5163	0.000515472	Up	DES8.11	Delta(12) fatty acid desaturase DES8.11	GO:0006636,GO:0016021,GO:0016717	unsaturated fatty acid biosynthetic process|integral component of membrane|oxidoreductase activity, acting on paired donors, with oxidation of a pair of donors resulting in the reduction of molecular oxygen to two molecules of water
Cse_sc000174.1_g050.1	0.32946	4.46273	13.5456	0.0444328	Up	DES8.11	Delta(12) fatty acid desaturase DES8.11	GO:0006636,GO:0016021,GO:0016717	unsaturated fatty acid biosynthetic process|integral component of membrane|oxidoreductase activity, acting on paired donors, with oxidation of a pair of donors resulting in the reduction of molecular oxygen to two molecules of water
Cse_sc000174.1_g060.1	1.34381	60.263	44.845	0.00515576	Up	DES8.11	Delta(12) fatty acid desaturase DES8.11	GO:0006636,GO:0016021,GO:0016717	unsaturated fatty acid biosynthetic process|integral component of membrane|oxidoreductase activity, acting on paired donors, with oxidation of a pair of donors resulting in the reduction of molecular oxygen to two molecules of water
Cse_sc000175.1_g020.1	284.891	123.689	0.434163	0.000301203	Down	SRF1	Protein STRUBBELIG-RECEPTOR FAMILY 1
Cse_sc000176.1_g090.1	11.4992	1.72136	0.149694	0.00532961	Down	EXPA1	Expansin-A1
Cse_sc000178.1_g010.1	1.61366	27.4941	17.0383	3.33579e-07	Up
Cse_sc000179.1_g050.1	1293.83	24.6155	0.0190253	1.15093e-12	Down	At4g20840	Berberine bridge enzyme-like 21	GO:0005618,GO:0005886,GO:0016899,GO:0048046,GO:0071949	cell wall|plasma membrane|oxidoreductase activity, acting on the CH-OH group of donors, oxygen as acceptor|apoplast|FAD binding
Cse_sc000182.1_g130.1	58.3101	119.421	2.04803	0.0149778	Up
Cse_sc000183.1_g080.1	341.699	1.78613	0.00522719	1.07101e-14	Down	GAE1	UDP-glucuronate 4-epimerase 1	GO:0005768,GO:0005794,GO:0005802,GO:0016021,GO:0032580,GO:0033481,GO:0050378,GO:0050829,GO:0050832	endosome|Golgi apparatus|trans-Golgi network|integral component of membrane|Golgi cisterna membrane|galacturonate biosynthetic process|UDP-glucuronate 4-epimerase activity|defense response to Gram-negative bacterium|defense response to fungus
Cse_sc000183.1_g180.1	210.351	70.0894	0.333203	0.00662117	Down	At4g30520	Probable LRR receptor-like serine/threonine-protein kinase At4g30520
Cse_sc000185.1_g010.1	3.87857	0	0	0.0311776	Down	MYB306	Myb-related protein 306	GO:0003677,GO:0005634	DNA binding|nucleus
Cse_sc000186.1_g070.1	62.9927	29.5157	0.468557	0.0111006	Down	At3g26430	GDSL esterase/lipase At3g26430	GO:0005576,GO:0016042,GO:0016298	extracellular region|lipid catabolic process|lipase activity
Cse_sc000187.1_g020.1	50.1762	13.0824	0.260729	9.07987e-05	Down	MYB3R4	Transcription factor MYB3R-4	GO:0003700,GO:0003713,GO:0005634,GO:0006355,GO:0009620,GO:0009623,GO:0009751,GO:0032465,GO:0032875,GO:0043565,GO:0045893,GO:1901181	DNA-binding transcription factor activity|transcription coactivator activity|nucleus|regulation of transcription, DNA-templated|response to fungus|response to parasitic fungus|response to salicylic acid|regulation of cytokinesis|regulation of DNA endoreduplication|sequence-specific DNA binding|positive regulation of transcription, DNA-templated|negative regulation of cellular response to caffeine
Cse_sc000188.1_g090.1	32.3269	10.1521	0.314045	0.00236427	Down	FAAH	Fatty acid amide hydrolase	GO:0004040,GO:0005773,GO:0005774,GO:0005783,GO:0005789,GO:0005794,GO:0005886,GO:0016021,GO:0042742,GO:0047412,GO:0070291,GO:0102077,GO:0103073	amidase activity|vacuole|vacuolar membrane|endoplasmic reticulum|endoplasmic reticulum membrane|Golgi apparatus|plasma membrane|integral component of membrane|defense response to bacterium|N-(long-chain-acyl)ethanolamine deacylase activity|N-acylethanolamine metabolic process|oleamide hydrolase activity|anandamide amidohydrolase activity
Cse_sc000190.1_g050.1	14.914	3.63351	0.243631	0.013492	Down	ATG16	Autophagy-related protein 16	GO:0000045,GO:0000421,GO:0015031	autophagosome assembly|autophagosome membrane|protein transport
Cse_sc000197.1_g020.1	19.4904	312.112	16.0137	0.000655336	Up	YUC10	Probable indole-3-pyruvate monooxygenase YUCCA10	GO:0004499,GO:0009851,GO:0050660,GO:0050661,GO:0103075	N,N-dimethylaniline monooxygenase activity|auxin biosynthetic process|flavin adenine dinucleotide binding|NADP binding|indole-3-pyruvate monooxygenase activity
Cse_sc000197.1_g040.1	124.73	0	0	9.25344e-08	Down	YUC5	Probable indole-3-pyruvate monooxygenase YUCCA5	GO:0004497,GO:0004499,GO:0009851,GO:0050660,GO:0050661,GO:0103075	monooxygenase activity|N,N-dimethylaniline monooxygenase activity|auxin biosynthetic process|flavin adenine dinucleotide binding|NADP binding|indole-3-pyruvate monooxygenase activity
Cse_sc000197.1_g060.1	51.5472	19.7934	0.383987	0.00291195	Down	NHX2	Sodium/hydrogen exchanger 2	GO:0005774,GO:0005886,GO:0009651,GO:0010107,GO:0015385,GO:0015386,GO:0016021,GO:0051453,GO:0055075,GO:0071805,GO:0090333,GO:0098719	vacuolar membrane|plasma membrane|response to salt stress|potassium ion import|sodium:proton antiporter activity|potassium:proton antiporter activity|integral component of membrane|regulation of intracellular pH|potassium ion homeostasis|potassium ion transmembrane transport|regulation of stomatal closure|sodium ion import across plasma membrane
Cse_sc000197.1_g070.1	184.852	446.03	2.4129	9.62299e-05	Up	exgA	Probable glucan 1,3-beta-glucosidase A	GO:0004338,GO:0005576,GO:0006073,GO:0009251,GO:0009986,GO:0046872,GO:0071555	glucan exo-1,3-beta-glucosidase activity|extracellular region|cellular glucan metabolic process|glucan catabolic process|cell surface|metal ion binding|cell wall organization
Cse_sc000198.1_g050.1	56.0174	26.6428	0.475617	0.0151198	Down	STT3A	Dolichyl-diphosphooligosaccharide--protein glycosyltransferase subunit STT3A	GO:0004576,GO:0005783,GO:0005789,GO:0005886,GO:0006486,GO:0009651,GO:0016020,GO:0016021,GO:0046872,GO:0047484	oligosaccharyl transferase activity|endoplasmic reticulum|endoplasmic reticulum membrane|plasma membrane|protein glycosylation|response to salt stress|membrane|integral component of membrane|metal ion binding|regulation of response to osmotic stress
Cse_sc000198.1_g200.1	29.3415	0.699696	0.0238466	0.00174462	Down
Cse_sc000199.1_g050.1	11.5751	97.6591	8.43698	0.0279936	Up	poxN1	Peroxidase N1	GO:0004601,GO:0005576,GO:0006979,GO:0020037,GO:0042744,GO:0046872	peroxidase activity|extracellular region|response to oxidative stress|heme binding|hydrogen peroxide catabolic process|metal ion binding
Cse_sc000200.1_g020.1	58.661	12.4275	0.211852	2.67152e-06	Down	BAMT	Benzoate carboxyl methyltransferase	GO:0008168	methyltransferase activity
Cse_sc000200.1_g040.1	18.3986	2.05235	0.111549	0.0335692	Down
Cse_sc000200.1_g050.1	11.4394	3.58127	0.313066	0.0393438	Down	PSF3	DNA replication complex GINS protein PSF3	GO:0005634,GO:0006260	nucleus|DNA replication
Cse_sc000201.1_g070.1	613.589	1337.34	2.17953	0.000343873	Up
Cse_sc000203.1_g140.1	8.77916	1.78613	0.203451	0.0300984	Down	AKR1	Palmitoyltransferase AKR1	GO:0000139,GO:0016021,GO:0019706,GO:0031901	Golgi membrane|integral component of membrane|protein-cysteine S-palmitoyltransferase activity|early endosome membrane
Cse_sc000204.1_g060.1	25.6989	174.773	6.80079	3.93497e-12	Up	At3g10130	Heme-binding-like protein At3g10130, chloroplastic	GO:0009507,GO:0009535,GO:0010287,GO:0020037	chloroplast|chloroplast thylakoid membrane|plastoglobule|heme binding
Cse_sc000204.1_g080.1	78.8451	33.8453	0.429263	0.00323228	Down
Cse_sc000204.1_g090.1	169.446	73.198	0.431983	0.000712593	Down
Cse_sc000204.1_g100.1	23.591	62.8783	2.66535	0.0271001	Up	N	TMV resistance protein N	GO:0005524,GO:0005737,GO:0007165,GO:0009626,GO:0043531	ATP binding|cytoplasm|signal transduction|plant-type hypersensitive response|ADP binding
Cse_sc000206.1_g080.1	41.3918	3.66055	0.0884366	2.18485e-08	Down	PDC2	Pyruvate decarboxylase 2 (Fragment)	GO:0000287,GO:0004737,GO:0030976	magnesium ion binding|pyruvate decarboxylase activity|thiamine pyrophosphate binding
Cse_sc000206.1_g160.1	36.1718	2.26634	0.0626548	4.60251e-09	Down	PER60	Peroxidase 60	GO:0004601,GO:0005576,GO:0006979,GO:0009505,GO:0009506,GO:0020037,GO:0042744,GO:0046872	peroxidase activity|extracellular region|response to oxidative stress|plant-type cell wall|plasmodesma|heme binding|hydrogen peroxide catabolic process|metal ion binding
Cse_sc000207.1_g020.1	3475.92	784.847	0.225795	1.14592e-11	Down	FLS	Flavonol synthase/flavanone 3-hydroxylase	GO:0005737,GO:0009813,GO:0031418,GO:0045486,GO:0046872	cytoplasm|flavonoid biosynthetic process|L-ascorbic acid binding|naringenin 3-dioxygenase activity|metal ion binding
Cse_sc000208.1_g060.1	4.18207	0	0	0.022961	Down	MSI4	WD-40 repeat-containing protein MSI4	GO:0005634,GO:0005730,GO:0005737,GO:0005829,GO:0006281,GO:0006325,GO:0009908,GO:0010224,GO:0030154,GO:0046872,GO:0080008	nucleus|nucleolus|cytoplasm|cytosol|DNA repair|chromatin organization|flower development|response to UV-B|cell differentiation|metal ion binding|Cul4-RING E3 ubiquitin ligase complex
Cse_sc000208.1_g100.1	1181.66	146.486	0.123966	8.24088e-19	Down	HTH	Protein HOTHEAD	GO:0005576,GO:0007267,GO:0009553,GO:0010430,GO:0016614,GO:0046593,GO:0050660	extracellular region|cell-cell signaling|embryo sac development|fatty acid omega-oxidation|oxidoreductase activity, acting on CH-OH group of donors|mandelonitrile lyase activity|flavin adenine dinucleotide binding
Cse_sc000215.1_g010.1	70.2243	4.77569	0.0680062	0.00296964	Down	TIP1-1	Aquaporin TIP1-1	GO:0000326,GO:0005773,GO:0005774,GO:0006833,GO:0009705,GO:0009941,GO:0015204,GO:0015250,GO:0015840,GO:0016021,GO:0042807,GO:0080170	protein storage vacuole|vacuole|vacuolar membrane|water transport|plant-type vacuole membrane|chloroplast envelope|urea transmembrane transporter activity|water channel activity|urea transport|integral component of membrane|central vacuole|hydrogen peroxide transmembrane transport
Cse_sc000220.1_g030.1	35.4419	244.236	6.89116	4.88025e-05	Up	PAE8	Pectin acetylesterase 8	GO:0005576,GO:0009505,GO:0052793,GO:0071555	extracellular region|plant-type cell wall|pectin acetylesterase activity|cell wall organization
Cse_sc000221.1_g090.1	11.8361	0.330986	0.0279642	0.00010062	Down	EB1C	Microtubule-associated protein RP/EB family member 1C	GO:0005618,GO:0005634,GO:0005730,GO:0005815,GO:0005819,GO:0005874,GO:0005881,GO:0008017,GO:0009524,GO:0009652,GO:0030865,GO:0031110,GO:0035371,GO:0035372,GO:0051010,GO:0051225,GO:0051233,GO:0051301,GO:1904825	cell wall|nucleus|nucleolus|microtubule organizing center|spindle|microtubule|cytoplasmic microtubule|microtubule binding|phragmoplast|thigmotropism|cortical cytoskeleton organization|regulation of microtubule polymerization or depolymerization|microtubule plus-end|protein localization to microtubule|microtubule plus-end binding|spindle assembly|spindle midzone|cell division|protein localization …
Cse_sc000221.1_g140.1	65.6333	19.6764	0.299794	0.00010155	Down	SPAC1F5.03c	Putative oxidoreductase C1F5.03c	GO:0005737,GO:0005770,GO:0005829,GO:0016021,GO:0016491,GO:0042147	cytoplasm|late endosome|cytosol|integral component of membrane|oxidoreductase activity|retrograde transport, endosome to Golgi
Cse_sc000223.1_g060.1	120.855	330.988	2.73871	1.57597e-05	Up	N	TMV resistance protein N	GO:0005524,GO:0005737,GO:0007165,GO:0009626,GO:0043531	ATP binding|cytoplasm|signal transduction|plant-type hypersensitive response|ADP binding
Cse_sc000223.1_g070.1	14.0837	3.85651	0.273828	0.0162133	Down	At4g00893	F-box protein At4g00893
Cse_sc000223.1_g110.1	17.7013	137.883	7.78945	1.07731e-12	Up
Cse_sc000223.1_g120.1	11.3127	1.94986	0.17236	0.00964056	Down	BHLH93	Transcription factor bHLH93	GO:0003677,GO:0003700,GO:0005634,GO:0007275,GO:0010371,GO:0045487,GO:0046983	DNA binding|DNA-binding transcription factor activity|nucleus|multicellular organism development|regulation of gibberellin biosynthetic process|gibberellin catabolic process|protein dimerization activity
Cse_sc000224.1_g010.1	1047.61	59.6607	0.0569496	3.82678e-16	Down	CBL9	Calcineurin B-like protein 9	GO:0005509,GO:0005737,GO:0005886,GO:0009414,GO:0009738,GO:0009860,GO:0019900	calcium ion binding|cytoplasm|plasma membrane|response to water deprivation|abscisic acid-activated signaling pathway|pollen tube growth|kinase binding
Cse_sc000224.1_g020.1	162.916	1.36167	0.00835812	5.21549e-11	Down	ALA4	Probable phospholipid-transporting ATPase 4	GO:0000139,GO:0000287,GO:0004012,GO:0005524,GO:0005802,GO:0005886,GO:0016021,GO:0045332,GO:0048194	Golgi membrane|magnesium ion binding|phospholipid-translocating ATPase activity|ATP binding|trans-Golgi network|plasma membrane|integral component of membrane|phospholipid translocation|Golgi vesicle budding
Cse_sc000224.1_g050.1	78.1914	30.9472	0.395788	0.00181856	Down	TKI1	TSL-kinase interacting protein 1	GO:0003677,GO:0003682,GO:0005634	DNA binding|chromatin binding|nucleus
Cse_sc000225.1_g050.1	7.41903	0.643946	0.0867965	0.0120013	Down	N	TMV resistance protein N	GO:0005524,GO:0005737,GO:0007165,GO:0009626,GO:0043531	ATP binding|cytoplasm|signal transduction|plant-type hypersensitive response|ADP binding
Cse_sc000226.1_g020.1	11.5078	41.0384	3.56612	0.00043441	Up	N	TMV resistance protein N	GO:0005524,GO:0005737,GO:0007165,GO:0009626,GO:0043531	ATP binding|cytoplasm|signal transduction|plant-type hypersensitive response|ADP binding
Cse_sc000226.1_g070.1	423.368	60.9665	0.144004	2.1153e-15	Down		Putative invertase inhibitor	GO:0004857,GO:0005576	enzyme inhibitor activity|extracellular region
Cse_sc000228.1_g040.1	12.6899	51.0686	4.02434	5.66995e-05	Up	GOT1	Vesicle transport protein GOT1	GO:0000139,GO:0016021,GO:0016192	Golgi membrane|integral component of membrane|vesicle-mediated transport
Cse_sc000228.1_g060.1	915.756	175.939	0.192125	5.24003e-13	Down
Cse_sc000228.1_g150.1	5.9409	0	0	0.0125919	Down	ANT1	ADP,ATP carrier protein, mitochondrial (Fragment)	GO:0005743,GO:0016021,GO:0022857	mitochondrial inner membrane|integral component of membrane|transmembrane transporter activity
Cse_sc000229.1_g020.1	41.1358	19.2773	0.468627	0.0197429	Down
Cse_sc000229.1_g030.1	908.283	271.69	0.299125	5.44344e-08	Down	FLA2	Fasciclin-like arabinogalactan protein 2	GO:0005774,GO:0005886,GO:0016020,GO:0031225,GO:0046658	vacuolar membrane|plasma membrane|membrane|anchored component of membrane|anchored component of plasma membrane
Cse_sc000234.1_g010.1	73.7887	20.5527	0.278534	2.68916e-05	Down	TPX2	Protein TPX2	GO:0000278,GO:0005634,GO:0005654,GO:0005819,GO:0005874,GO:0008017,GO:0009524,GO:0009941,GO:0032147,GO:0051225,GO:0051301,GO:0060236,GO:0090307	mitotic cell cycle|nucleus|nucleoplasm|spindle|microtubule|microtubule binding|phragmoplast|chloroplast envelope|activation of protein kinase activity|spindle assembly|cell division|regulation of mitotic spindle organization|mitotic spindle assembly
Cse_sc000234.1_g020.1	24.4847	1.34364	0.0548768	0.000197008	Down	SPL5	Squamosa promoter-binding-like protein 5	GO:0003677,GO:0003700,GO:0005634,GO:0005737,GO:0006355,GO:0010321,GO:0046872	DNA binding|DNA-binding transcription factor activity|nucleus|cytoplasm|regulation of transcription, DNA-templated|regulation of vegetative phase change|metal ion binding
Cse_sc000234.1_g090.1	32.369	113.091	3.4938	5.72682e-06	Up
Cse_sc000236.1_g060.1	49.3387	6.3243	0.128181	0.00730668	Down	SYM1	Protein SYM1	GO:0005743,GO:0016021	mitochondrial inner membrane|integral component of membrane
Cse_sc000239.1_g030.1	7.8989	1.08643	0.137542	0.0372707	Down	At5g35370	G-type lectin S-receptor-like serine/threonine-protein kinase At5g35370
Cse_sc000240.1_g140.1	361.008	3.16582	0.00876941	1.0588e-22	Down	CYP93A3	Cytochrome P450 93A3	GO:0005506,GO:0016020,GO:0016021,GO:0016709,GO:0020037	iron ion binding|membrane|integral component of membrane|oxidoreductase activity, acting on paired donors, with incorporation or reduction of molecular oxygen, NAD(P)H as one donor, and incorporation of one atom of oxygen|heme binding
Cse_sc000241.1_g080.1	125.461	26.1503	0.208434	0.0140475	Down
Cse_sc000241.1_g120.1	4.40195	0	0	0.017529	Down
Cse_sc000241.1_g180.1	87.4411	1.35266	0.0154693	1.25454e-06	Down	WSD1	O-acyltransferase WSD1	GO:0004144,GO:0005783,GO:0005789,GO:0005886,GO:0010025,GO:0016021,GO:0019432,GO:0047196,GO:0102966,GO:0103095	diacylglycerol O-acyltransferase activity|endoplasmic reticulum|endoplasmic reticulum membrane|plasma membrane|wax biosynthetic process|integral component of membrane|triglyceride biosynthetic process|long-chain-alcohol O-fatty-acyltransferase activity|arachidoyl-CoA:1-dodecanol O-acyltransferase activity|wax ester synthase activity
Cse_sc000243.1_g040.1	338.275	75.4647	0.223087	4.49963e-10	Down	At1g29470	Probable methyltransferase PMT24	GO:0000139,GO:0005768,GO:0005794,GO:0005802,GO:0008757,GO:0016021,GO:0052546	Golgi membrane|endosome|Golgi apparatus|trans-Golgi network|S-adenosylmethionine-dependent methyltransferase activity|integral component of membrane|cell wall pectin metabolic process
Cse_sc000243.1_g080.1	28.6447	11.1415	0.388957	0.0292615	Down	SBT1.5	Subtilisin-like protease SBT1.5	GO:0004252,GO:0005576	serine-type endopeptidase activity|extracellular region
Cse_sc000244.1_g100.1	456.762	1201.06	2.62951	1.19547e-05	Up	EBF2	EIN3-binding F-box protein 2	GO:0005634,GO:0006511,GO:0009723,GO:0009873,GO:0010105,GO:0016567,GO:0019005,GO:0031146	nucleus|ubiquitin-dependent protein catabolic process|response to ethylene|ethylene-activated signaling pathway|negative regulation of ethylene-activated signaling pathway|protein ubiquitination|SCF ubiquitin ligase complex|SCF-dependent proteasomal ubiquitin-dependent protein catabolic process
Cse_sc000244.1_g130.1	9.11704	46.5803	5.10915	6.76364e-06	Up	LUG	Transcriptional corepressor LEUNIG	GO:0001077,GO:0001666,GO:0005634,GO:0006974,GO:0006979,GO:0009414,GO:0009611,GO:0009617,GO:0009620,GO:0009624,GO:0009733,GO:0009908,GO:0009909,GO:0009944,GO:0010073,GO:0010272,GO:0010393,GO:0030154,GO:0045892,GO:0045995,GO:0046898,GO:0048359,GO:0051512,GO:0071217,GO:0080001,GO:1902074,GO:1902183,GO:2000024	proximal promoter DNA-binding transcription activator activity, RNA polymerase II-specific|response to hypoxia|nucleus|cellular response to DNA damage stimulus|response to oxidative stress|response to water deprivation|response to wounding|response to bacterium|response to fungus|response to nematode|response to auxin|flower development|regulation of flower development|polarity specification of a…
Cse_sc000245.1_g020.1	80.6238	171.886	2.13196	0.00400068	Up	IAA27	Auxin-responsive protein IAA27	GO:0003700,GO:0005634,GO:0009733,GO:0009734	DNA-binding transcription factor activity|nucleus|response to auxin|auxin-activated signaling pathway
Cse_sc000245.1_g030.1	467.261	4.89436	0.0104746	1.44249e-09	Down	GLOX1	Aldehyde oxidase GLOX1	GO:0004031,GO:0005576,GO:0007275,GO:0102797,GO:0102798	aldehyde oxidase activity|extracellular region|multicellular organism development|geranial:oxygen oxidoreductase activity|heptaldehyde:oxygen oxidoreductase activity
Cse_sc000246.1_g140.1	214.005	47.7188	0.22298	2.33763e-08	Down	At1g65240	Aspartic proteinase-like protein 2	GO:0004190,GO:0005886,GO:0006508,GO:0030163,GO:0031225,GO:0046658	aspartic-type endopeptidase activity|plasma membrane|proteolysis|protein catabolic process|anchored component of membrane|anchored component of plasma membrane
Cse_sc000251.1_g060.1	12.7149	2.07038	0.162831	0.00379892	Down
Cse_sc000256.1_g040.1	14.6518	76.6717	5.23292	1.00487e-07	Up	FER	Receptor-like protein kinase FERONIA
Cse_sc000256.1_g060.1	154.091	314.838	2.0432	0.00212801	Up	FER	Receptor-like protein kinase FERONIA
Cse_sc000257.1_g050.1	117.068	39.7344	0.339412	0.000698136	Down	ALDH2C4	Aldehyde dehydrogenase family 2 member C4	GO:0004029,GO:0005829,GO:0009699,GO:0043878,GO:0050269	aldehyde dehydrogenase (NAD) activity|cytosol|phenylpropanoid biosynthetic process|glyceraldehyde-3-phosphate dehydrogenase (NAD+) (non-phosphorylating) activity|coniferyl-aldehyde dehydrogenase activity
Cse_sc000257.1_g060.1	206.736	1.70167	0.00823112	3.49361e-08	Down	GNL2	ARF guanine-nucleotide exchange factor GNL2	GO:0005086,GO:0005829,GO:0009846,GO:0015031,GO:0016020,GO:0032012,GO:0090406	ARF guanyl-nucleotide exchange factor activity|cytosol|pollen germination|protein transport|membrane|regulation of ARF protein signal transduction|pollen tube
Cse_sc000257.1_g110.1	8.18728	0	0	0.000476517	Down	KIN7N	Kinesin-like protein KIN-7N	GO:0003777,GO:0005524,GO:0005871,GO:0005874,GO:0007018,GO:0008017,GO:0016887	microtubule motor activity|ATP binding|kinesin complex|microtubule|microtubule-based movement|microtubule binding|ATPase activity
Cse_sc000261.1_g040.1	8.7443	0	0	0.000274188	Down	At2g04230	F-box/FBD/LRR-repeat protein At2g04230
Cse_sc000263.1_g060.1	9.03269	0.321973	0.0356453	0.00121799	Down
Cse_sc000263.1_g070.1	106.161	1.02167	0.00962379	5.18526e-08	Down	KLCR2	Protein KINESIN LIGHT CHAIN-RELATED 2	GO:0005886,GO:0009860,GO:0031347	plasma membrane|pollen tube growth|regulation of defense response
Cse_sc000264.1_g050.1	31.2636	79.3141	2.53695	0.00110271	Up	COP1	E3 ubiquitin-protein ligase COP1	GO:0000152,GO:0004842,GO:0005634,GO:0005737,GO:0006281,GO:0009585,GO:0009640,GO:0009641,GO:0009647,GO:0009649,GO:0010119,GO:0016604,GO:0042802,GO:0046283,GO:0046872,GO:0048573,GO:0061630,GO:0080008	nuclear ubiquitin ligase complex|ubiquitin-protein transferase activity|nucleus|cytoplasm|DNA repair|red, far-red light phototransduction|photomorphogenesis|shade avoidance|skotomorphogenesis|entrainment of circadian clock|regulation of stomatal movement|nuclear body|identical protein binding|anthocyanin-containing compound metabolic process|metal ion binding|photoperiodism, flowering|ubiquitin p…
Cse_sc000266.1_g030.1	58.94	8.11593	0.137698	2.96057e-08	Down	BHLH66	Transcription factor bHLH66	GO:0001228,GO:0003677,GO:0003700,GO:0005634,GO:0006355,GO:0046983,GO:0048235,GO:0048765,GO:0048767,GO:0055046,GO:0080147	DNA-binding transcription activator activity, RNA polymerase II-specific|DNA binding|DNA-binding transcription factor activity|nucleus|regulation of transcription, DNA-templated|protein dimerization activity|pollen sperm cell differentiation|root hair cell differentiation|root hair elongation|microgametogenesis|root hair cell development
Cse_sc000266.1_g050.1	554.029	205.587	0.371075	0.000608994	Down	GAPN	NADP-dependent glyceraldehyde-3-phosphate dehydrogenase	GO:0005737,GO:0008886	cytoplasm|glyceraldehyde-3-phosphate dehydrogenase (NADP+) (non-phosphorylating) activity
Cse_sc000267.1_g030.1	105.821	413.522	3.90776	5.79055e-09	Up	At4g27290	G-type lectin S-receptor-like serine/threonine-protein kinase At4g27290
Cse_sc000267.1_g040.1	74.9678	228.248	3.04462	6.4597e-06	Up	At4g27290	G-type lectin S-receptor-like serine/threonine-protein kinase At4g27290
Cse_sc000269.1_g020.1	10.8727	2.42106	0.222673	0.0183005	Down
Cse_sc000269.1_g040.1	368.213	22.693	0.0616302	1.63932e-17	Down	SCPL18	Serine carboxypeptidase-like 18	GO:0004185,GO:0005576,GO:0019748	serine-type carboxypeptidase activity|extracellular region|secondary metabolic process
Cse_sc000269.1_g070.1	43.4694	2.77909	0.063932	6.61742e-10	Down		Histone H3.2	GO:0000786,GO:0003677,GO:0005634,GO:0046982	nucleosome|DNA binding|nucleus|protein heterodimerization activity
Cse_sc000271.1_g070.1	335.464	153.716	0.45822	0.000808298	Down
Cse_sc000272.1_g010.1	3.24463	25.4072	7.83052	8.45889e-05	Up	APT3	Adenine phosphoribosyltransferase 3	GO:0003999,GO:0005829,GO:0006166,GO:0006168,GO:0044209	adenine phosphoribosyltransferase activity|cytosol|purine ribonucleoside salvage|adenine salvage|AMP salvage
Cse_sc000274.1_g150.1	12.0151	0	0	1.81216e-05	Down	GGR	Heterodimeric geranylgeranyl pyrophosphate synthase small subunit, chloroplastic	GO:0009507,GO:0009535,GO:0042651,GO:0043693,GO:0046872	chloroplast|chloroplast thylakoid membrane|thylakoid membrane|monoterpene biosynthetic process|metal ion binding
Cse_sc000276.1_g070.1	11.4829	0.330986	0.0288244	0.000153968	Down	ABCA7	ABC transporter A family member 7	GO:0005215,GO:0005524,GO:0005886,GO:0006869,GO:0009506,GO:0016021,GO:0042626,GO:0043231	transporter activity|ATP binding|plasma membrane|lipid transport|plasmodesma|integral component of membrane|ATPase activity, coupled to transmembrane movement of substances|intracellular membrane-bounded organelle
Cse_sc000282.1_g100.1	223.883	16.6779	0.0744937	1.90543e-07	Down	USPL1	BURP domain protein USPL1	GO:0000326,GO:0005770,GO:0005795,GO:0048316	protein storage vacuole|late endosome|Golgi stack|seed development
Cse_sc000282.1_g110.1	136.533	17.7411	0.12994	3.03799e-08	Down	ASAT3	Acylsugar acyltransferase 3	GO:0005985,GO:0016746,GO:0016747	sucrose metabolic process|transferase activity, transferring acyl groups|transferase activity, transferring acyl groups other than amino-acyl groups
Cse_sc000283.1_g050.1	4.34235	78.2796	18.027	0.0118751	Up	At1g30700	Berberine bridge enzyme-like 8	GO:0005576,GO:0005618,GO:0016491,GO:0071949	extracellular region|cell wall|oxidoreductase activity|FAD binding
Cse_sc000283.1_g100.1	117.792	325.955	2.76722	1.15907e-05	Up	RLK5	Receptor-like protein kinase 5
Cse_sc000284.1_g100.1	18.6209	4.83144	0.259463	0.00516175	Down		Nigrin b	GO:0006952,GO:0017148,GO:0030246,GO:0030598,GO:0090729	defense response|negative regulation of translation|carbohydrate binding|rRNA N-glycosylase activity|toxin activity
Cse_sc000284.1_g120.1	27.0004	12.6237	0.467538	0.0471261	Down	UGT91A1	UDP-glycosyltransferase 91A1	GO:0008194,GO:0043231,GO:0080043,GO:0080044	UDP-glycosyltransferase activity|intracellular membrane-bounded organelle|quercetin 3-O-glucosyltransferase activity|quercetin 7-O-glucosyltransferase activity
Cse_sc000286.1_g040.1	449.065	961.388	2.14087	0.000475759	Up	XEG113	Arabinosyltransferase XEG113	GO:0000139,GO:0005768,GO:0005794,GO:0005802,GO:0006486,GO:0016021,GO:0052325,GO:0052636,GO:0080147	Golgi membrane|endosome|Golgi apparatus|trans-Golgi network|protein glycosylation|integral component of membrane|cell wall pectin biosynthetic process|arabinosyltransferase activity|root hair cell development
Cse_sc000286.1_g050.1	55.5384	0.321973	0.0057973	5.97078e-05	Down
Cse_sc000288.1_g020.1	14.5136	0	0	0.00392021	Down	APUM4	Pumilio homolog 4	GO:0003729,GO:0005737,GO:0006417	mRNA binding|cytoplasm|regulation of translation
Cse_sc000288.1_g070.1	58.7496	2.04334	0.0347804	1.63165e-05	Down
Cse_sc000289.1_g040.1	1950.84	4.86015	0.00249131	7.7187e-24	Down	At1g29660	GDSL esterase/lipase At1g29660	GO:0005634,GO:0009627,GO:0016042,GO:0016788,GO:0048046	nucleus|systemic acquired resistance|lipid catabolic process|hydrolase activity, acting on ester bonds|apoplast
Cse_sc000289.1_g060.1	14.0078	0.330986	0.0236288	1.71136e-05	Down	At1g29670	GDSL esterase/lipase At1g29670	GO:0005618,GO:0009507,GO:0009534,GO:0016042,GO:0016788,GO:0048046	cell wall|chloroplast|chloroplast thylakoid|lipid catabolic process|hydrolase activity, acting on ester bonds|apoplast
Cse_sc000289.1_g110.1	771.953	87.705	0.113614	1.25262e-19	Down	AG2	Floral homeotic protein AGAMOUS	GO:0000977,GO:0003700,GO:0005634,GO:0045944,GO:0046983	RNA polymerase II regulatory region sequence-specific DNA binding|DNA-binding transcription factor activity|nucleus|positive regulation of transcription by RNA polymerase II|protein dimerization activity
Cse_sc000291.1_g090.1	18.502	66.872	3.61432	3.92448e-05	Up	AHP5	Histidine-containing phosphotransfer protein 5	GO:0000160,GO:0005634,GO:0005737,GO:0005829,GO:0009557,GO:0009560,GO:0009736,GO:0009927,GO:0043424	phosphorelay signal transduction system|nucleus|cytoplasm|cytosol|antipodal cell differentiation|embryo sac egg cell differentiation|cytokinin-activated signaling pathway|histidine phosphotransfer kinase activity|protein histidine kinase binding
Cse_sc000292.1_g070.1	256.96	95.0226	0.369796	3.48861e-05	Down	NCS1	Purine-uracil permease NCS1	GO:0005886,GO:0009526,GO:0015205,GO:0016021,GO:0031969,GO:0043100	plasma membrane|plastid envelope|nucleobase transmembrane transporter activity|integral component of membrane|chloroplast membrane|pyrimidine nucleobase salvage
Cse_sc000294.1_g020.1	64.8725	497.843	7.67418	7.51095e-17	Up
Cse_sc000296.1_g050.1	160.915	485.925	3.01977	1.45685e-06	Up	ABCC3	ABC transporter C family member 3	GO:0000325,GO:0005524,GO:0005773,GO:0005774,GO:0008559,GO:0009506,GO:0010290,GO:0015431,GO:0016020,GO:0016021,GO:0042626,GO:0048046,GO:0055085	plant-type vacuole|ATP binding|vacuole|vacuolar membrane|xenobiotic transmembrane transporting ATPase activity|plasmodesma|chlorophyll catabolite transmembrane transporter activity|glutathione S-conjugate-exporting ATPase activity|membrane|integral component of membrane|ATPase activity, coupled to transmembrane movement of substances|apoplast|transmembrane transport
Cse_sc000298.1_g060.1	1569.24	307.592	0.196013	0.000149077	Down	CRK29	Cysteine-rich receptor-like protein kinase 29
Cse_sc000298.1_g080.1	873	15.8702	0.0181789	2.0128e-11	Down	CRK11	Cysteine-rich receptor-like protein kinase 11	GO:0004672,GO:0004674,GO:0005524,GO:0005886,GO:0006468,GO:0006979,GO:0009816,GO:0016020,GO:0016021,GO:0042742	protein kinase activity|protein serine/threonine kinase activity|ATP binding|plasma membrane|protein phosphorylation|response to oxidative stress|defense response to bacterium, incompatible interaction|membrane|integral component of membrane|defense response to bacterium
Cse_sc000298.1_g100.1	9.39579	1.73939	0.185125	0.0206559	Down	CRK10	Cysteine-rich receptor-like protein kinase 10
Cse_sc000298.1_g120.1	2530.59	19.0953	0.00754579	8.79775e-17	Down	CRK29	Cysteine-rich receptor-like protein kinase 29
Cse_sc000302.1_g030.1	3.9545	13.2154	3.34187	0.02832	Up	CHC2	Clathrin heavy chain 2	GO:0005198,GO:0005794,GO:0005829,GO:0005886,GO:0006886,GO:0006897,GO:0006898,GO:0009506,GO:0009507,GO:0016020,GO:0016192,GO:0030130,GO:0030132,GO:0032051,GO:0042802,GO:0048268,GO:0071439	structural molecule activity|Golgi apparatus|cytosol|plasma membrane|intracellular protein transport|endocytosis|receptor-mediated endocytosis|plasmodesma|chloroplast|membrane|vesicle-mediated transport|clathrin coat of trans-Golgi network vesicle|clathrin coat of coated pit|clathrin light chain binding|identical protein binding|clathrin coat assembly|clathrin complex
Cse_sc000305.1_g090.1	9.18455	0	0	0.00127332	Down	XA21	Receptor kinase-like protein Xa21	GO:0004674,GO:0005524,GO:0005634,GO:0005789,GO:0005886,GO:0006952,GO:0016021,GO:0031349,GO:0046777,GO:1900426	protein serine/threonine kinase activity|ATP binding|nucleus|endoplasmic reticulum membrane|plasma membrane|defense response|integral component of membrane|positive regulation of defense response|protein autophosphorylation|positive regulation of defense response to bacterium
Cse_sc000306.1_g020.1	141.099	6.03487	0.0427705	4.12768e-07	Down	PMADS1	Floral homeotic protein PMADS 1	GO:0000977,GO:0003700,GO:0005634,GO:0007275,GO:0045944,GO:0046983	RNA polymerase II regulatory region sequence-specific DNA binding|DNA-binding transcription factor activity|nucleus|multicellular organism development|positive regulation of transcription by RNA polymerase II|protein dimerization activity
Cse_sc000306.1_g040.1	3.65746	0	0	0.034812	Down	RE2	Retrovirus-related Pol polyprotein from transposon RE2	GO:0000943,GO:0003676,GO:0003964,GO:0004190,GO:0004519,GO:0006310,GO:0015074,GO:0046872	retrotransposon nucleocapsid|nucleic acid binding|RNA-directed DNA polymerase activity|aspartic-type endopeptidase activity|endonuclease activity|DNA recombination|DNA integration|metal ion binding
Cse_sc000308.1_g040.1	6.40468	0.377723	0.0589761	0.010298	Down
Cse_sc000308.1_g060.1	47.6392	9.75117	0.204688	9.95958e-06	Down
Cse_sc000308.1_g070.1	5.44994	0	0	0.00670153	Down
Cse_sc000311.1_g030.1	399.085	103.331	0.258919	0.000621244	Down	PME13	Probable pectinesterase/pectinesterase inhibitor 13	GO:0005618,GO:0016021,GO:0030599,GO:0042545,GO:0045330,GO:0045490,GO:0046910	cell wall|integral component of membrane|pectinesterase activity|cell wall modification|aspartyl esterase activity|pectin catabolic process|pectinesterase inhibitor activity
Cse_sc000311.1_g040.1	176.852	376.166	2.12701	0.000849226	Up	AKR4C9	NADPH-dependent aldo-keto reductase, chloroplastic	GO:0004032,GO:0004033,GO:0008106,GO:0009409,GO:0009414,GO:0009507,GO:0009636,GO:0009651,GO:0016229,GO:0016491,GO:0055114,GO:0070401	alditol:NADP+ 1-oxidoreductase activity|aldo-keto reductase (NADP) activity|alcohol dehydrogenase (NADP+) activity|response to cold|response to water deprivation|chloroplast|response to toxic substance|response to salt stress|steroid dehydrogenase activity|oxidoreductase activity|oxidation-reduction process|NADP+ binding
Cse_sc000315.1_g010.1	15.9434	2.87256	0.180172	0.00194669	Down	CYP71D55	Premnaspirodiene oxygenase	GO:0004497,GO:0005506,GO:0016021,GO:0016705,GO:0020037	monooxygenase activity|iron ion binding|integral component of membrane|oxidoreductase activity, acting on paired donors, with incorporation or reduction of molecular oxygen|heme binding
Cse_sc000315.1_g040.1	615.473	2099.61	3.41138	0.00167613	Up	At5g01750	Protein LURP-one-related 15	GO:0009507,GO:0019904	chloroplast|protein domain specific binding
Cse_sc000316.1_g010.1	274.881	72.4039	0.263401	7.15798e-05	Down	PUB34	U-box domain-containing protein 34
Cse_sc000317.1_g040.1	6.73292	0.377723	0.0561009	0.00667376	Down
Cse_sc000318.1_g010.1	243.681	0.377723	0.00155007	2.79541e-07	Down	At1g12663	Thionin-like protein 2	GO:0005576,GO:0006952	extracellular region|defense response
Cse_sc000318.1_g070.1	6.23574	0.377723	0.0605739	0.0128439	Down		Chitinase 1	GO:0000272,GO:0004568,GO:0006032,GO:0008061	polysaccharide catabolic process|chitinase activity|chitin catabolic process|chitin binding
Cse_sc000321.1_g030.1	70.9649	11.7511	0.16559	0.00310302	Down	GEM	GLABRA2 expression modulator	GO:0005829,GO:0010026,GO:0010482,GO:0048765,GO:0051567	cytosol|trichome differentiation|regulation of epidermal cell division|root hair cell differentiation|histone H3-K9 methylation
Cse_sc000321.1_g080.1	10.0122	0	0	8.67234e-05	Down	CYCD4-1	Cyclin-D4-1	GO:0000079,GO:0000278,GO:0000307,GO:0005634,GO:0005737,GO:0006468,GO:0007088,GO:0008284,GO:0016538,GO:0019901,GO:0045787,GO:0051301	regulation of cyclin-dependent protein serine/threonine kinase activity|mitotic cell cycle|cyclin-dependent protein kinase holoenzyme complex|nucleus|cytoplasm|protein phosphorylation|regulation of mitotic nuclear division|positive regulation of cell proliferation|cyclin-dependent protein serine/threonine kinase regulator activity|protein kinase binding|positive regulation of cell cycle|cell divi…
Cse_sc000324.1_g020.1	7.33346	1.37068	0.186908	0.0424616	Down	IQD1	Protein IQ-DOMAIN 1	GO:0005516,GO:0005634,GO:0005737,GO:0005874,GO:0008017	calmodulin binding|nucleus|cytoplasm|microtubule|microtubule binding
Cse_sc000324.1_g040.1	73.5648	7.65208	0.104018	1.23271e-10	Down	MYB26	Transcription factor MYB26	GO:0003700,GO:0005634,GO:0009739,GO:0009834,GO:0030154,GO:0043565,GO:0044212	DNA-binding transcription factor activity|nucleus|response to gibberellin|plant-type secondary cell wall biogenesis|cell differentiation|sequence-specific DNA binding|transcription regulatory region DNA binding
Cse_sc000327.1_g080.1	510.53	1649.96	3.23185	6.29549e-08	Up	YSL7	Probable metal-nicotianamine transporter YSL7	GO:0005886,GO:0016021,GO:0055085	plasma membrane|integral component of membrane|transmembrane transport
Cse_sc000331.1_g010.1	346.578	4.3277	0.012487	5.4693e-40	Down	PIN4	Auxin efflux carrier component 4	GO:0005783,GO:0005886,GO:0009734,GO:0009926,GO:0010252,GO:0010315,GO:0010329,GO:0016021,GO:0048364	endoplasmic reticulum|plasma membrane|auxin-activated signaling pathway|auxin polar transport|auxin homeostasis|auxin efflux|auxin efflux transmembrane transporter activity|integral component of membrane|root development
Cse_sc000334.1_g010.1	567.202	1758.88	3.10097	7.57376e-05	Up	YDL109C	Putative lipase YDL109C	GO:0016042,GO:0044255,GO:0047372	lipid catabolic process|cellular lipid metabolic process|acylglycerol lipase activity
Cse_sc000334.1_g060.1	88.1647	773.934	8.77828	0.00128246	Up	ERF5	Ethylene-responsive transcription factor 5	GO:0003677,GO:0003700,GO:0005634,GO:0006952,GO:0009873	DNA binding|DNA-binding transcription factor activity|nucleus|defense response|ethylene-activated signaling pathway
Cse_sc000334.1_g090.1	165.672	512.037	3.09068	1.513e-06	Up	ERF2	Ethylene-responsive transcription factor 2	GO:0003677,GO:0003700,GO:0005634,GO:0006952,GO:0009873	DNA binding|DNA-binding transcription factor activity|nucleus|defense response|ethylene-activated signaling pathway
Cse_sc000334.1_g100.1	7.43414	1.35266	0.181952	0.0362003	Down
Cse_sc000336.1_g010.1	7.96641	28.3034	3.55285	0.00176826	Up
Cse_sc000337.1_g010.1	52.2323	24.6178	0.471315	0.0209927	Down	MER3	DExH-box ATP-dependent RNA helicase DExH17	GO:0003677,GO:0003678,GO:0005524,GO:0005634,GO:0007131,GO:0019843,GO:0051026	DNA binding|DNA helicase activity|ATP binding|nucleus|reciprocal meiotic recombination|rRNA binding|chiasma assembly
Cse_sc000337.1_g030.1	18.7219	2.8078	0.149974	0.000356903	Down
Cse_sc000338.1_g030.1	56.5732	17.7231	0.313277	0.000290938	Down	SMC2-2	Structural maintenance of chromosomes protein 2-2	GO:0005215,GO:0005524,GO:0005634,GO:0005694,GO:0030261,GO:0051301,GO:0051321	transporter activity|ATP binding|nucleus|chromosome|chromosome condensation|cell division|meiotic cell cycle
Cse_sc000338.1_g080.1	3577.69	446.975	0.124934	8.39151e-11	Down	BT4	BTB/POZ and TAZ domain-containing protein 4	GO:0003712,GO:0004402,GO:0005516,GO:0005634,GO:0005737,GO:0005774,GO:0006355,GO:0008270,GO:0009611,GO:0009651,GO:0009733,GO:0009739,GO:0009751,GO:0009753,GO:0016567,GO:0042542	transcription coregulator activity|histone acetyltransferase activity|calmodulin binding|nucleus|cytoplasm|vacuolar membrane|regulation of transcription, DNA-templated|zinc ion binding|response to wounding|response to salt stress|response to auxin|response to gibberellin|response to salicylic acid|response to jasmonic acid|protein ubiquitination|response to hydrogen peroxide
Cse_sc000339.1_g070.1	64.8453	32.1187	0.495313	0.0181302	Down	EMB8	Embryogenesis-associated protein EMB8	GO:0052689	carboxylic ester hydrolase activity
Cse_sc000341.1_g030.1	9.6743	2.09909	0.216976	0.0274177	Down
Cse_sc000342.1_g030.1	340.689	22.1369	0.0649769	8.24578e-24	Down	At1g48100	Polygalacturonase At1g48100	GO:0004650,GO:0005576,GO:0005618,GO:0005975,GO:0009831	polygalacturonase activity|extracellular region|cell wall|carbohydrate metabolic process|plant-type cell wall modification involved in multidimensional cell growth
Cse_sc000343.1_g040.1	14.0414	2.83484	0.201891	0.00492519	Down	CYP78A5	Cytochrome P450 78A5	GO:0005506,GO:0005783,GO:0008284,GO:0016020,GO:0016021,GO:0016709,GO:0020037,GO:0035265,GO:0040009,GO:0046622,GO:0048437	iron ion binding|endoplasmic reticulum|positive regulation of cell proliferation|membrane|integral component of membrane|oxidoreductase activity, acting on paired donors, with incorporation or reduction of molecular oxygen, NAD(P)H as one donor, and incorporation of one atom of oxygen|heme binding|organ growth|regulation of growth rate|positive regulation of organ growth|floral organ development
Cse_sc000345.1_g090.1	4.14843	34.457	8.30604	8.59471e-07	Up	N	TMV resistance protein N	GO:0005524,GO:0005737,GO:0007165,GO:0009626,GO:0043531	ATP binding|cytoplasm|signal transduction|plant-type hypersensitive response|ADP binding
Cse_sc000345.1_g110.1	2.29855	15.8505	6.89587	0.00349378	Up	N	TMV resistance protein N	GO:0005524,GO:0005737,GO:0007165,GO:0009626,GO:0043531	ATP binding|cytoplasm|signal transduction|plant-type hypersensitive response|ADP binding
Cse_sc000347.1_g030.1	115.984	579.903	4.99984	9.34599e-07	Up	HSP70	Heat shock cognate 70 kDa protein	GO:0005524	ATP binding
Cse_sc000351.1_g040.1	1.00569	18.4336	18.3293	6.41773e-06	Up	SD18	Receptor-like serine/threonine-protein kinase SD1-8
Cse_sc000352.1_g030.1	69.1298	11.082	0.160307	2.93984e-08	Down	PATL5	Patellin-5	GO:0007049,GO:0008289,GO:0009507,GO:0016020,GO:0051301	cell cycle|lipid binding|chloroplast|membrane|cell division
Cse_sc000354.1_g050.1	332.926	131.278	0.394315	7.01398e-05	Down		Root allergen protein	GO:0006952,GO:0009607	defense response|response to biotic stimulus
Cse_sc000358.1_g080.1	4893.09	2100.16	0.42921	0.000883585	Down	GAE6	UDP-glucuronate 4-epimerase 6	GO:0005768,GO:0005794,GO:0005802,GO:0016021,GO:0032580,GO:0033481,GO:0050378,GO:0050829,GO:0050832	endosome|Golgi apparatus|trans-Golgi network|integral component of membrane|Golgi cisterna membrane|galacturonate biosynthetic process|UDP-glucuronate 4-epimerase activity|defense response to Gram-negative bacterium|defense response to fungus
Cse_sc000361.1_g040.1	17.8774	0.983945	0.0550384	0.00160376	Down	RE2	Retrovirus-related Pol polyprotein from transposon RE2	GO:0000943,GO:0003676,GO:0003964,GO:0004190,GO:0004519,GO:0006310,GO:0015074,GO:0046872	retrotransposon nucleocapsid|nucleic acid binding|RNA-directed DNA polymerase activity|aspartic-type endopeptidase activity|endonuclease activity|DNA recombination|DNA integration|metal ion binding
Cse_sc000362.1_g040.1	96.3267	23.4465	0.243406	0.000482602	Down		Glycosyl hydrolase 5 family protein	GO:0004553,GO:0005975	hydrolase activity, hydrolyzing O-glycosyl compounds|carbohydrate metabolic process
Cse_sc000362.1_g070.1	434.158	31.1508	0.07175	8.43484e-07	Down	SAP1	Protein SAP1	GO:0005524,GO:0008568,GO:0016887,GO:0031122	ATP binding|microtubule-severing ATPase activity|ATPase activity|cytoplasmic microtubule organization
Cse_sc000363.1_g090.1	269.234	1245.61	4.62649	1.70199e-10	Up
Cse_sc000364.1_g050.1	74.9789	287.474	3.83407	0.0325733	Up	WRKY69	Probable WRKY transcription factor 69	GO:0003700,GO:0005634,GO:0043565	DNA-binding transcription factor activity|nucleus|sequence-specific DNA binding
Cse_sc000364.1_g070.1	207.96	45.4026	0.218323	0.000337039	Down	At1g02370	Pentatricopeptide repeat-containing protein At1g02370, mitochondrial
Cse_sc000364.1_g090.1	34.2446	2.30956	0.0674431	1.07592e-06	Down	ANX2	Receptor-like protein kinase ANXUR2
Cse_sc000365.1_g010.1	29.5905	76.6771	2.59127	0.000743179	Up	TGA1	Transcription factor TGA1	GO:0003700,GO:0005634,GO:0006351,GO:0042742,GO:0043565,GO:0044212	DNA-binding transcription factor activity|nucleus|transcription, DNA-templated|defense response to bacterium|sequence-specific DNA binding|transcription regulatory region DNA binding
Cse_sc000368.1_g010.1	8.27187	0.643946	0.0778476	0.00597363	Down	At4g17486	DeSI-like protein At4g17486	GO:0008233	peptidase activity
Cse_sc000368.1_g060.1	11.795	26.5637	2.25212	0.041851	Up
Cse_sc000372.1_g090.1	32.0195	140.878	4.39975	0.00285997	Up	IDD7	Protein indeterminate-domain 7	GO:0003677,GO:0003700,GO:0005634,GO:0006355,GO:0046872	DNA binding|DNA-binding transcription factor activity|nucleus|regulation of transcription, DNA-templated|metal ion binding
Cse_sc000373.1_g020.1	84.983	9.04764	0.106464	2.72062e-10	Down	At4g00893	F-box protein At4g00893
Cse_sc000373.1_g070.1	546.467	230.336	0.421501	0.000103022	Down	ALKBH2	DNA oxidative demethylase ALKBH2	GO:0005634,GO:0006281,GO:0006307,GO:0008198,GO:0035511,GO:0035514,GO:0043734,GO:0051747,GO:0103053	nucleus|DNA repair|DNA dealkylation involved in DNA repair|ferrous iron binding|oxidative DNA demethylation|DNA demethylase activity|DNA-N1-methyladenine dioxygenase activity|cytosine C-5 DNA demethylase activity|1-ethyladenine demethylase activity
Cse_sc000374.1_g030.1	63.0447	19.5434	0.309993	0.000312725	Down	KAN2	Probable transcription factor KAN2	GO:0003700,GO:0005634,GO:0006355,GO:0009944,GO:0030154,GO:0044212,GO:0048440,GO:0048481	DNA-binding transcription factor activity|nucleus|regulation of transcription, DNA-templated|polarity specification of adaxial/abaxial axis|cell differentiation|transcription regulatory region DNA binding|carpel development|plant ovule development
Cse_sc000374.1_g050.1	7.65402	1.03068	0.134659	0.0168661	Down
Cse_sc000374.1_g100.1	99.837	9.31738	0.0933259	1.9717e-13	Down	SUMO2	Small ubiquitin-related modifier 2	GO:0005634,GO:0005737,GO:0016925	nucleus|cytoplasm|protein sumoylation
Cse_sc000374.1_g110.1	9.72403	0	0	0.000114128	Down	SUMO8	Putative small ubiquitin-related modifier 8	GO:0005634,GO:0005737	nucleus|cytoplasm
Cse_sc000376.1_g050.1	1089.96	2660.15	2.44059	0.000172685	Up
Cse_sc000376.1_g060.1	685.587	2100.23	3.0634	0.0021301	Up
Cse_sc000379.1_g010.1	104.635	235.997	2.25542	0.0458326	Up	HERK1	Receptor-like protein kinase HERK 1
Cse_sc000379.1_g060.1	19.4307	50.1524	2.58109	0.00436605	Up	ANX2	Receptor-like protein kinase ANXUR2
Cse_sc000380.1_g060.1	282.992	1730.69	6.11568	1.34136e-09	Up	NAC056	NAC transcription factor 56	GO:0003700,GO:0005634,GO:0009753,GO:0044212,GO:0045893,GO:0045995,GO:0048317,GO:0080060	DNA-binding transcription factor activity|nucleus|response to jasmonic acid|transcription regulatory region DNA binding|positive regulation of transcription, DNA-templated|regulation of embryonic development|seed morphogenesis|integument development
Cse_sc000380.1_g110.1	63.5613	258.134	4.06117	0.001277	Up	AS	Hydroquinone glucosyltransferase	GO:0050505	hydroquinone glucosyltransferase activity
Cse_sc000380.1_g120.1	87.1115	411.897	4.72839	0.000586649	Up	UGT72B1	UDP-glycosyltransferase 72B1	GO:0006805,GO:0008194,GO:0009636,GO:0009651,GO:0009809,GO:0035251,GO:0042178,GO:0043231,GO:0050505,GO:0080043,GO:0080044	xenobiotic metabolic process|UDP-glycosyltransferase activity|response to toxic substance|response to salt stress|lignin biosynthetic process|UDP-glucosyltransferase activity|xenobiotic catabolic process|intracellular membrane-bounded organelle|hydroquinone glucosyltransferase activity|quercetin 3-O-glucosyltransferase activity|quercetin 7-O-glucosyltransferase activity
Cse_sc000380.1_g130.1	12.5299	31.4855	2.51283	0.0112006	Up	UGT76B1	UDP-glycosyltransferase 76B1	GO:0002239,GO:0006952,GO:0008194,GO:0010150,GO:0043231,GO:0046527,GO:0052640,GO:0080043,GO:0080044	response to oomycetes|defense response|UDP-glycosyltransferase activity|leaf senescence|intracellular membrane-bounded organelle|glucosyltransferase activity|salicylic acid glucosyltransferase (glucoside-forming) activity|quercetin 3-O-glucosyltransferase activity|quercetin 7-O-glucosyltransferase activity
Cse_sc000381.1_g100.1	19.9499	793.309	39.7651	8.91576e-41	Up
Cse_sc000383.1_g020.1	6.73292	0.965918	0.143462	0.0327666	Down	RECQL5	ATP-dependent DNA helicase Q-like 5	GO:0000405,GO:0000724,GO:0000781,GO:0003677,GO:0003697,GO:0005524,GO:0005634,GO:0005694,GO:0005737,GO:0006260,GO:0006281,GO:0006284,GO:0006310,GO:0008284,GO:0009378,GO:0010971,GO:0032357,GO:0032508,GO:0036310,GO:0042631,GO:0043140,GO:0045740,GO:0061820,GO:0061821	bubble DNA binding|double-strand break repair via homologous recombination|chromosome, telomeric region|DNA binding|single-stranded DNA binding|ATP binding|nucleus|chromosome|cytoplasm|DNA replication|DNA repair|base-excision repair|DNA recombination|positive regulation of cell proliferation|four-way junction helicase activity|positive regulation of G2/M transition of mitotic cell cycle|oxidized …
Cse_sc000383.1_g030.1	23.3677	104.718	4.4813	2.61388e-07	Up
Cse_sc000383.1_g040.1	175.091	65.6654	0.375035	9.72034e-05	Down
Cse_sc000383.1_g050.1	139.572	414.004	2.96623	0.000686882	Up
Cse_sc000383.1_g100.1	0.625281	19.0953	30.5387	0.0195479	Up	At3g47570	Probable LRR receptor-like serine/threonine-protein kinase At3g47570
Cse_sc000384.1_g010.1	653.992	193.496	0.295869	7.1729e-05	Down	MED27	Mediator of RNA polymerase II transcription subunit 27	GO:0016592	mediator complex
Cse_sc000384.1_g060.1	6.03171	0	0	0.0174436	Down	TMK1	Receptor protein kinase TMK1
Cse_sc000388.1_g010.1	22.6766	90.1089	3.97365	0.0396073	Up	ZFP10	Zinc finger protein 10	GO:0003676,GO:0003700,GO:0005634,GO:0006355,GO:0007275,GO:0040008,GO:0046872	nucleic acid binding|DNA-binding transcription factor activity|nucleus|regulation of transcription, DNA-templated|multicellular organism development|regulation of growth|metal ion binding
Cse_sc000388.1_g070.1	316.152	95.1375	0.300923	4.99092e-07	Down	LRK10L-1.5	LEAF RUST 10 DISEASE-RESISTANCE LOCUS RECEPTOR-LIKE PROTEIN KINASE-like 1.5
Cse_sc000389.1_g020.1	1335.18	425.972	0.319037	2.55612e-05	Down	GPAT6	Glycerol-3-phosphate 2-O-acyltransferase 6	GO:0008654,GO:0009908,GO:0010143,GO:0016020,GO:0016021,GO:0016791,GO:0090447,GO:0102419	phospholipid biosynthetic process|flower development|cutin biosynthetic process|membrane|integral component of membrane|phosphatase activity|glycerol-3-phosphate 2-O-acyltransferase activity|sn-2-glycerol-3-phosphate omega-OH-C22:0-CoA acyl transferase activity
Cse_sc000389.1_g040.1	4.19938	33.4729	7.97091	0.00142337	Up	At4g19900	Uncharacterized protein At4g19900
Cse_sc000389.1_g050.1	766.376	1619.9	2.11372	0.00326883	Up	CPL2	RNA polymerase II C-terminal domain phosphatase-like 2	GO:0003723,GO:0004647,GO:0005634,GO:0005737,GO:0007275,GO:0008420,GO:0009734,GO:0045893,GO:0046872,GO:0070940	RNA binding|phosphoserine phosphatase activity|nucleus|cytoplasm|multicellular organism development|RNA polymerase II CTD heptapeptide repeat phosphatase activity|auxin-activated signaling pathway|positive regulation of transcription, DNA-templated|metal ion binding|dephosphorylation of RNA polymerase II C-terminal domain
Cse_sc000391.1_g010.1	358.404	138.187	0.385561	3.13626e-05	Down	CDSP32	Thioredoxin-like protein CDSP32, chloroplastic	GO:0006662,GO:0006979,GO:0009414,GO:0009507,GO:0009570,GO:0009941,GO:0015035,GO:0045454	glycerol ether metabolic process|response to oxidative stress|response to water deprivation|chloroplast|chloroplast stroma|chloroplast envelope|protein disulfide oxidoreductase activity|cell redox homeostasis
Cse_sc000392.1_g020.1	513.529	128.199	0.249644	0.0313457	Down	MYB102	Transcription factor MYB102	GO:0003700,GO:0005634,GO:0006355,GO:0006952,GO:0006970,GO:0009611,GO:0009651,GO:0009737,GO:0030154,GO:0043565,GO:0044212	DNA-binding transcription factor activity|nucleus|regulation of transcription, DNA-templated|defense response|response to osmotic stress|response to wounding|response to salt stress|response to abscisic acid|cell differentiation|sequence-specific DNA binding|transcription regulatory region DNA binding
Cse_sc000394.1_g090.1	17.7263	79.3841	4.47833	8.77414e-07	Up	RLP33	Receptor-like protein 33	GO:0005886,GO:0009507,GO:0016021	plasma membrane|chloroplast|integral component of membrane
Cse_sc000395.1_g030.1	3.23598	13.1433	4.06162	0.0148747	Up	PLDBETA1	Phospholipase D beta 1	GO:0004630,GO:0005546,GO:0005737,GO:0009506,GO:0009816,GO:0016020,GO:0016042,GO:0046686,GO:0070290	phospholipase D activity|phosphatidylinositol-4,5-bisphosphate binding|cytoplasm|plasmodesma|defense response to bacterium, incompatible interaction|membrane|lipid catabolic process|response to cadmium ion|N-acylphosphatidylethanolamine-specific phospholipase D activity
Cse_sc000397.1_g060.1	9.39555	0	0	0.000152763	Down	At3g06240	F-box/kelch-repeat protein At3g06240
Cse_sc000398.1_g040.1	1216.2	2722.85	2.23881	0.000157752	Up
Cse_sc000401.1_g060.1	151.401	1219.97	8.05786	7.32032e-09	Up	NCL2	Sodium/calcium exchanger NCL2	GO:0005509,GO:0005886,GO:0006814,GO:0006874,GO:0015369,GO:0016021,GO:0070588	calcium ion binding|plasma membrane|sodium ion transport|cellular calcium ion homeostasis|calcium:proton antiporter activity|integral component of membrane|calcium ion transmembrane transport
Cse_sc000403.1_g010.1	870.032	8382.13	9.63427	5.91463e-05	Up	ABCG36	ABC transporter G family member 36	GO:0005524,GO:0005739,GO:0005774,GO:0005886,GO:0006855,GO:0009507,GO:0009627,GO:0009737,GO:0009817,GO:0009941,GO:0015086,GO:0015691,GO:0016020,GO:0016021,GO:0031348,GO:0042344,GO:0042626,GO:0042742,GO:0052544,GO:0055085,GO:0071366	ATP binding|mitochondrion|vacuolar membrane|plasma membrane|drug transmembrane transport|chloroplast|systemic acquired resistance|response to abscisic acid|defense response to fungus, incompatible interaction|chloroplast envelope|cadmium ion transmembrane transporter activity|cadmium ion transport|membrane|integral component of membrane|negative regulation of defense response|indole glucosinolate…
Cse_sc000403.1_g090.1	62.9944	1.94986	0.030953	5.87323e-15	Down
Cse_sc000403.1_g120.1	86.6176	284.856	3.28866	2.1145e-06	Up	IAA26	Auxin-responsive protein IAA26	GO:0003700,GO:0005634,GO:0009733,GO:0009734	DNA-binding transcription factor activity|nucleus|response to auxin|auxin-activated signaling pathway
Cse_sc000406.1_g030.1	500.849	3562.51	7.11294	4.79404e-18	Up	At2g48020	Sugar transporter ERD6-like 7	GO:0005351,GO:0005355,GO:0005773,GO:0005774,GO:0005887,GO:0006829,GO:0008645,GO:0009507,GO:0009705	carbohydrate:proton symporter activity|glucose transmembrane transporter activity|vacuole|vacuolar membrane|integral component of plasma membrane|zinc ion transport|hexose transmembrane transport|chloroplast|plant-type vacuole membrane
Cse_sc000406.1_g060.1	208.758	469.484	2.24894	0.00195922	Up	RBK2	Receptor-like cytosolic serine/threonine-protein kinase RBK2
Cse_sc000408.1_g030.1	76.6062	4.77569	0.0623408	1.01978e-13	Down
Cse_sc000408.1_g050.1	101.329	10.0029	0.0987168	6.01188e-13	Down
Cse_sc000408.1_g130.1	33.0764	0.755446	0.0228394	1.07462e-10	Down	MRS2-2	Magnesium transporter MRS2-2	GO:0005886,GO:0009555,GO:0015095,GO:0015693,GO:0016021	plasma membrane|pollen development|magnesium ion transmembrane transporter activity|magnesium ion transport|integral component of membrane
Cse_sc000409.1_g010.1	162.594	10.9778	0.0675169	1.29813e-10	Down	AGD1	ADP-ribosylation factor GTPase-activating protein AGD1	GO:0005096,GO:0005768,GO:0005886,GO:0007010,GO:0030139,GO:0035618,GO:0046872,GO:0048768	GTPase activator activity|endosome|plasma membrane|cytoskeleton organization|endocytic vesicle|root hair|metal ion binding|root hair cell tip growth
Cse_sc000409.1_g070.1	98.0058	32.0843	0.327372	6.61534e-05	Down	PHS1	Dual specificity protein phosphatase PHS1	GO:0004721,GO:0004725,GO:0005737,GO:0008138,GO:0009737,GO:0009738,GO:0010119,GO:0010468,GO:0016301,GO:0043622	phosphoprotein phosphatase activity|protein tyrosine phosphatase activity|cytoplasm|protein tyrosine/serine/threonine phosphatase activity|response to abscisic acid|abscisic acid-activated signaling pathway|regulation of stomatal movement|regulation of gene expression|kinase activity|cortical microtubule organization
Cse_sc000409.1_g080.1	170.178	21.2593	0.124924	4.01612e-12	Down	SCPL45	Serine carboxypeptidase-like 45	GO:0004185,GO:0005576,GO:0005773,GO:0009505,GO:0009506,GO:0051603	serine-type carboxypeptidase activity|extracellular region|vacuole|plant-type cell wall|plasmodesma|proteolysis involved in cellular protein catabolic process
Cse_sc000410.1_g050.1	5.0772	0	0	0.0093079	Down	SPBC3H7.11	Uncharacterized methyltransferase C3H7.11	GO:0005634,GO:0005829,GO:0030488,GO:0052735	nucleus|cytosol|tRNA methylation|tRNA (cytosine-3-)-methyltransferase activity
Cse_sc000412.1_g050.1	100.892	478.523	4.74294	2.56933e-07	Up	CSLE6	Cellulose synthase-like protein E6	GO:0000139,GO:0005794,GO:0005802,GO:0005886,GO:0009833,GO:0016021,GO:0016759,GO:0016760,GO:0030244,GO:0071555	Golgi membrane|Golgi apparatus|trans-Golgi network|plasma membrane|plant-type primary cell wall biogenesis|integral component of membrane|cellulose synthase activity|cellulose synthase (UDP-forming) activity|cellulose biosynthetic process|cell wall organization
Cse_sc000412.1_g060.1	138.57	24.4573	0.176498	0.000182518	Down	At1g12150	WEB family protein At1g12150	GO:0005829,GO:0009903,GO:0009904	cytosol|chloroplast avoidance movement|chloroplast accumulation movement
Cse_sc000418.1_g060.1	1153.41	4162.26	3.60866	0.00631522	Up	PNC1	Cationic peroxidase 1	GO:0004601,GO:0005576,GO:0006979,GO:0020037,GO:0042744,GO:0046872	peroxidase activity|extracellular region|response to oxidative stress|heme binding|hydrogen peroxide catabolic process|metal ion binding
Cse_sc000420.1_g200.1	14.6429	31.1525	2.12748	0.0411083	Up	AAT1	Acetyl-CoA acetyltransferase, cytosolic 1	GO:0003857,GO:0003985,GO:0003988,GO:0004300,GO:0005739,GO:0005777,GO:0005829,GO:0005886,GO:0006635,GO:0008299,GO:0009846,GO:0009860,GO:0016125,GO:0046872	3-hydroxyacyl-CoA dehydrogenase activity|acetyl-CoA C-acetyltransferase activity|acetyl-CoA C-acyltransferase activity|enoyl-CoA hydratase activity|mitochondrion|peroxisome|cytosol|plasma membrane|fatty acid beta-oxidation|isoprenoid biosynthetic process|pollen germination|pollen tube growth|sterol metabolic process|metal ion binding
Cse_sc000420.1_g210.1	26.3338	9.5891	0.364136	0.0116203	Down
Cse_sc000424.1_g070.1	22.6427	4.03827	0.178347	0.000381835	Down	At1g55890	Pentatricopeptide repeat-containing protein At1g55890, mitochondrial
Cse_sc000429.1_g020.1	257.875	55.4934	0.215195	9.93527e-07	Down	FBL25	F-box/LRR-repeat protein 25
Cse_sc000429.1_g040.1	369.586	78.4926	0.21238	1.50706e-10	Down	D6PK	Serine/threonine-protein kinase D6PK	GO:0004672,GO:0004674,GO:0005524,GO:0005634,GO:0005737,GO:0005886,GO:0006468,GO:0009630,GO:0009638,GO:0009734,GO:0009925,GO:0016301,GO:0048766,GO:0071944,GO:1901981,GO:2000114	protein kinase activity|protein serine/threonine kinase activity|ATP binding|nucleus|cytoplasm|plasma membrane|protein phosphorylation|gravitropism|phototropism|auxin-activated signaling pathway|basal plasma membrane|kinase activity|root hair initiation|cell periphery|phosphatidylinositol phosphate binding|regulation of establishment of cell polarity
Cse_sc000430.1_g010.1	494.422	133.32	0.269647	1.22713e-08	Down	GT7	Putative glycosyltransferase 7	GO:0000139,GO:0005768,GO:0005794,GO:0005802,GO:0008378,GO:0010192,GO:0010214,GO:0010392,GO:0016021,GO:0051070	Golgi membrane|endosome|Golgi apparatus|trans-Golgi network|galactosyltransferase activity|mucilage biosynthetic process|seed coat development|galactoglucomannan metabolic process|integral component of membrane|galactomannan biosynthetic process
Cse_sc000431.1_g040.1	98.1514	37.3005	0.38003	0.000367296	Down	RF4	Putative E3 ubiquitin-protein ligase RF4	GO:0016567,GO:0016740,GO:0046872	protein ubiquitination|transferase activity|metal ion binding
Cse_sc000432.1_g030.1	113.207	13.1036	0.115749	0.000598664	Down	ADS3	Palmitoyl-monogalactosyldiacylglycerol delta-7 desaturase, chloroplastic	GO:0005789,GO:0006636,GO:0009579,GO:0009979,GO:0010205,GO:0016021,GO:0016717,GO:0031408,GO:0031969	endoplasmic reticulum membrane|unsaturated fatty acid biosynthetic process|thylakoid|16:0 monogalactosyldiacylglycerol desaturase activity|photoinhibition|integral component of membrane|oxidoreductase activity, acting on paired donors, with oxidation of a pair of donors resulting in the reduction of molecular oxygen to two molecules of water|oxylipin biosynthetic process|chloroplast membrane
Cse_sc000432.1_g060.1	3889.03	438.288	0.112699	8.88337e-17	Down	PAS_chr4_0465	Sphingolipid C9-methyltransferase	GO:0006665,GO:0008168,GO:0008610,GO:0016021	sphingolipid metabolic process|methyltransferase activity|lipid biosynthetic process|integral component of membrane
Cse_sc000434.1_g110.1	23.6289	51.8468	2.19421	0.0165531	Up	YHI9	Uncharacterized isomerase YHI9	GO:0009058,GO:0016853,GO:0030968	biosynthetic process|isomerase activity|endoplasmic reticulum unfolded protein response
Cse_sc000439.1_g050.1	104.19	41.5672	0.398955	0.00547335	Down	CYP76B6	Geraniol 8-hydroxylase	GO:0005506,GO:0005789,GO:0016021,GO:0016099,GO:0016709,GO:0020037	iron ion binding|endoplasmic reticulum membrane|integral component of membrane|monoterpenoid biosynthetic process|oxidoreductase activity, acting on paired donors, with incorporation or reduction of molecular oxygen, NAD(P)H as one donor, and incorporation of one atom of oxygen|heme binding
Cse_sc000439.1_g080.1	21.8656	1.68364	0.0769996	6.41139e-06	Down	ALDH12A1	Delta-1-pyrroline-5-carboxylate dehydrogenase 12A1, mitochondrial	GO:0003842,GO:0005739,GO:0005759,GO:0006560,GO:0008270,GO:0009507,GO:0009651,GO:0010133,GO:0016620,GO:0050897,GO:0072593	1-pyrroline-5-carboxylate dehydrogenase activity|mitochondrion|mitochondrial matrix|proline metabolic process|zinc ion binding|chloroplast|response to salt stress|proline catabolic process to glutamate|oxidoreductase activity, acting on the aldehyde or oxo group of donors, NAD or NADP as acceptor|cobalt ion binding|reactive oxygen species metabolic process
Cse_sc000443.1_g040.1	362.738	132.573	0.365478	0.0200212	Down
Cse_sc000443.1_g070.1	501.628	7.39654	0.0147451	5.19404e-08	Down	CPK10	Calcium-dependent protein kinase 10	GO:0004683,GO:0005509,GO:0005524,GO:0005634,GO:0005737,GO:0009738,GO:0009931,GO:0016020,GO:0018105,GO:0035556	calmodulin-dependent protein kinase activity|calcium ion binding|ATP binding|nucleus|cytoplasm|abscisic acid-activated signaling pathway|calcium-dependent protein serine/threonine kinase activity|membrane|peptidyl-serine phosphorylation|intracellular signal transduction
Cse_sc000446.1_g140.1	0	19.9138	Inf	5.56141e-05	Up
Cse_sc000446.1_g220.1	208.09	521.804	2.50759	3.64923e-05	Up	CHL1	ATP-dependent DNA helicase CHL1	GO:0000790,GO:0003677,GO:0004003,GO:0005524,GO:0007064,GO:0034085,GO:0036297	nuclear chromatin|DNA binding|ATP-dependent DNA helicase activity|ATP binding|mitotic sister chromatid cohesion|establishment of sister chromatid cohesion|interstrand cross-link repair
Cse_sc000447.1_g040.1	7.91644	0	0	0.000627459	Down	TPR4	Topless-related protein 4	GO:0003714,GO:0005634,GO:0006355,GO:0009938,GO:0010072,GO:0010336,GO:1903507	transcription corepressor activity|nucleus|regulation of transcription, DNA-templated|negative regulation of gibberellic acid mediated signaling pathway|primary shoot apical meristem specification|gibberellic acid homeostasis|negative regulation of nucleic acid-templated transcription
Cse_sc000451.1_g060.1	7.17294	0	0	0.0011842	Down	RGTA2	Geranylgeranyl transferase type-2 subunit alpha 2	GO:0004663,GO:0005737,GO:0005968,GO:0018344	Rab geranylgeranyltransferase activity|cytoplasm|Rab-protein geranylgeranyltransferase complex|protein geranylgeranylation
Cse_sc000453.1_g040.1	29.948	195.56	6.52998	3.39131e-12	Up
Cse_sc000456.1_g090.1	1898.04	3840.57	2.02344	0.000891869	Up	HIPP26	Heavy metal-associated isoprenylated plant protein 26	GO:0005507,GO:0005886,GO:0009506,GO:0010286,GO:0030001,GO:0031965,GO:0032791,GO:0046870	copper ion binding|plasma membrane|plasmodesma|heat acclimation|metal ion transport|nuclear membrane|lead ion binding|cadmium ion binding
Cse_sc000458.1_g010.1	187.036	450.432	2.40826	0.0107763	Up
Cse_sc000458.1_g110.1	25.475	7.75975	0.304603	0.0405186	Down	ERF026	Ethylene-responsive transcription factor ERF026	GO:0003677,GO:0003700,GO:0005634,GO:0009873	DNA binding|DNA-binding transcription factor activity|nucleus|ethylene-activated signaling pathway
Cse_sc000459.1_g070.1	13.3476	0	0	0.00149036	Down	SRC2	Protein SRC2	GO:0005789,GO:0005886,GO:0016021,GO:0032586	endoplasmic reticulum membrane|plasma membrane|integral component of membrane|protein storage vacuole membrane
Cse_sc000460.1_g130.1	338.327	115.077	0.340136	0.000199056	Down	HST	Shikimate O-hydroxycinnamoyltransferase	GO:0047172	shikimate O-hydroxycinnamoyltransferase activity
Cse_sc000461.1_g040.1	140.998	37.2663	0.264304	4.83647e-07	Down	HSP26-A	Probable glutathione S-transferase	GO:0004364,GO:0005737,GO:0006749,GO:0009408,GO:0009733,GO:0009735,GO:0009737,GO:0009739,GO:0010038	glutathione transferase activity|cytoplasm|glutathione metabolic process|response to heat|response to auxin|response to cytokinin|response to abscisic acid|response to gibberellin|response to metal ion
Cse_sc000461.1_g080.1	12.5123	0	0	9.34083e-06	Down
Cse_sc000461.1_g090.1	12.5059	0	0	1.09703e-05	Down
Cse_sc000461.1_g210.1	10.4176	0.70871	0.0680302	0.00110136	Down
Cse_sc000462.1_g140.1	6.60726	0.330986	0.0500944	0.00830545	Down	QWRF6	QWRF motif-containing protein 6	GO:0005737,GO:0005813,GO:0005880,GO:0007098,GO:0008017,GO:0051225	cytoplasm|centrosome|nuclear microtubule|centrosome cycle|microtubule binding|spindle assembly
Cse_sc000463.1_g010.1	47.4662	21.3855	0.45054	0.0130937	Down	CHR28	Helicase-like transcription factor CHR28	GO:0003677,GO:0004386,GO:0005524,GO:0005634,GO:0006325,GO:0046872,GO:0080188	DNA binding|helicase activity|ATP binding|nucleus|chromatin organization|metal ion binding|RNA-directed DNA methylation
Cse_sc000464.1_g040.1	266.232	78.5977	0.295223	5.03014e-07	Down	GLR3.3	Glutamate receptor 3.3	GO:0004970,GO:0005262,GO:0005622,GO:0005886,GO:0006816,GO:0007267,GO:0008066,GO:0009611,GO:0009630,GO:0009864,GO:0016021,GO:0019722,GO:0045087,GO:0050832,GO:0071230	ionotropic glutamate receptor activity|calcium channel activity|intracellular|plasma membrane|calcium ion transport|cell-cell signaling|glutamate receptor activity|response to wounding|gravitropism|induced systemic resistance, jasmonic acid mediated signaling pathway|integral component of membrane|calcium-mediated signaling|innate immune response|defense response to fungus|cellular response to am…
Cse_sc000464.1_g080.1	10.4327	1.13317	0.108617	0.00472581	Down	RE1	Retrovirus-related Pol polyprotein from transposon RE1	GO:0000943,GO:0003676,GO:0003964,GO:0004190,GO:0004519,GO:0006310,GO:0015074,GO:0046872	retrotransposon nucleocapsid|nucleic acid binding|RNA-directed DNA polymerase activity|aspartic-type endopeptidase activity|endonuclease activity|DNA recombination|DNA integration|metal ion binding
Cse_sc000465.1_g100.1	892.723	2028.63	2.27241	0.0168781	Up	RFS6	Probable galactinol--sucrose galactosyltransferase 6	GO:0010325,GO:0047274	raffinose family oligosaccharide biosynthetic process|galactinol-sucrose galactosyltransferase activity
Cse_sc000466.1_g040.1	94.9438	431.655	4.54643	1.09815e-10	Up	PIK-1	Disease resistance protein Pik-1	GO:0005524,GO:0009626,GO:0009870,GO:0042742,GO:0043531	ATP binding|plant-type hypersensitive response|defense response signaling pathway, resistance gene-dependent|defense response to bacterium|ADP binding
Cse_sc000466.1_g080.1	547.057	1775.21	3.24501	5.74631e-08	Up	RGA5	Disease resistance protein RGA5	GO:0005524,GO:0005737,GO:0009626,GO:0009870,GO:0042742,GO:0043531,GO:0043621,GO:0060548	ATP binding|cytoplasm|plant-type hypersensitive response|defense response signaling pathway, resistance gene-dependent|defense response to bacterium|ADP binding|protein self-association|negative regulation of cell death
Cse_sc000470.1_g030.1	343.058	779.15	2.27119	0.000246451	Up	BBR	E3 ubiquitin ligase BIG BROTHER-related	GO:0004842,GO:0016567,GO:0046872,GO:0051865	ubiquitin-protein transferase activity|protein ubiquitination|metal ion binding|protein autoubiquitination
Cse_sc000473.1_g070.1	7782.79	621.225	0.0798202	5.74366e-16	Down	GASA11	Gibberellin-regulated protein 11	GO:0005576,GO:0009740	extracellular region|gibberellic acid mediated signaling pathway
Cse_sc000475.1_g010.1	1360.99	548.24	0.402825	3.71857e-05	Down	MED33A	Mediator of RNA polymerase II transcription subunit 33A	GO:0009698,GO:0016592,GO:2000762	phenylpropanoid metabolic process|mediator complex|regulation of phenylpropanoid metabolic process
Cse_sc000475.1_g040.1	1242	2640.83	2.12627	0.000418006	Up	TMS1	Membrane protein TMS1	GO:0016020,GO:0016021	membrane|integral component of membrane
Cse_sc000477.1_g030.1	818.153	1636.69	2.00047	0.0177359	Up	5MMP	Metalloendoproteinase 5-MMP	GO:0004222,GO:0005886,GO:0008270,GO:0031012,GO:0031225	metalloendopeptidase activity|plasma membrane|zinc ion binding|extracellular matrix|anchored component of membrane
Cse_sc000477.1_g130.1	25.8963	79.4195	3.06683	0.00019534	Up	ABCG36	ABC transporter G family member 36	GO:0005524,GO:0005739,GO:0005774,GO:0005886,GO:0006855,GO:0009507,GO:0009627,GO:0009737,GO:0009817,GO:0009941,GO:0015086,GO:0015691,GO:0016020,GO:0016021,GO:0031348,GO:0042344,GO:0042626,GO:0042742,GO:0052544,GO:0055085,GO:0071366	ATP binding|mitochondrion|vacuolar membrane|plasma membrane|drug transmembrane transport|chloroplast|systemic acquired resistance|response to abscisic acid|defense response to fungus, incompatible interaction|chloroplast envelope|cadmium ion transmembrane transporter activity|cadmium ion transport|membrane|integral component of membrane|negative regulation of defense response|indole glucosinolate…
Cse_sc000483.1_g060.1	5.06087	0	0	0.00937065	Down
Cse_sc000483.1_g100.1	24.7786	49.8236	2.01075	0.0337502	Up	EX1	Protein EXECUTER 1, chloroplastic	GO:0000304,GO:0009507,GO:0010343,GO:0042651	response to singlet oxygen|chloroplast|singlet oxygen-mediated programmed cell death|thylakoid membrane
Cse_sc000484.1_g020.1	435.623	903.417	2.07385	0.0269924	Up
Cse_sc000485.1_g050.1	56.986	512.703	8.997	8.83262e-19	Up	At3g27150	F-box/kelch-repeat protein At3g27150	GO:0005634,GO:0005829	nucleus|cytosol
Cse_sc000485.1_g060.1	58.2313	18.9085	0.324713	0.000450301	Down	At5g14170	SWI/SNF complex component SNF12 homolog	GO:0005634,GO:0006281,GO:0006325,GO:0009909,GO:0010224,GO:0010468,GO:0048364,GO:2000024	nucleus|DNA repair|chromatin organization|regulation of flower development|response to UV-B|regulation of gene expression|root development|regulation of leaf development
Cse_sc000485.1_g090.1	2.00273	18.4875	9.23117	7.76434e-05	Up	WAKL2	Wall-associated receptor kinase-like 2
Cse_sc000485.1_g160.1	561.543	4.02926	0.00717533	1.04196e-49	Down	APS1	Acid phosphatase 1	GO:0003993	acid phosphatase activity
Cse_sc000486.1_g030.1	19.214	2.61184	0.135934	0.000339807	Down
Cse_sc000486.1_g060.1	266.731	684.901	2.56776	0.000227171	Up		Lon protease homolog 2, peroxisomal	GO:0004176,GO:0004252,GO:0005524,GO:0005782,GO:0006515,GO:0016485,GO:0016558	ATP-dependent peptidase activity|serine-type endopeptidase activity|ATP binding|peroxisomal matrix|protein quality control for misfolded or incompletely synthesized proteins|protein processing|protein import into peroxisome matrix
Cse_sc000487.1_g040.1	1114.08	3005.1	2.69738	0.0230799	Up	GPXHA-2	Probable phospholipid hydroperoxide glutathione peroxidase	GO:0004602,GO:0005737,GO:0006979,GO:0047066	glutathione peroxidase activity|cytoplasm|response to oxidative stress|phospholipid-hydroperoxide glutathione peroxidase activity
Cse_sc000487.1_g090.1	561.018	1174.85	2.09415	0.00069848	Up	RER3	Protein RETICULATA-RELATED 3, chloroplastic	GO:0000302,GO:0009507,GO:0009536,GO:0009648,GO:0009793,GO:0009941,GO:0016021,GO:0031969,GO:0048366	response to reactive oxygen species|chloroplast|plastid|photoperiodism|embryo development ending in seed dormancy|chloroplast envelope|integral component of membrane|chloroplast membrane|leaf development
Cse_sc000488.1_g030.1	21.1973	86.4101	4.07647	2.24266e-06	Up	At4g27190	Disease resistance protein At4g27190
Cse_sc000488.1_g080.1	5.54318	0.330986	0.0597105	0.0225863	Down	KIN12F	Kinesin-like protein KIN-12F	GO:0003777,GO:0005524,GO:0005871,GO:0005874,GO:0007018,GO:0008017,GO:0016887	microtubule motor activity|ATP binding|kinesin complex|microtubule|microtubule-based movement|microtubule binding|ATPase activity
Cse_sc000494.1_g070.1	63.2657	2.55059	0.0403155	2.10521e-14	Down	BZIP43	Basic leucine zipper 43	GO:0003677,GO:0003700,GO:0005634	DNA binding|DNA-binding transcription factor activity|nucleus
Cse_sc000494.1_g130.1	9.85189	29.6002	3.00452	0.00593836	Up	PPCA	Phosphoenolpyruvate carboxylase 1	GO:0005737,GO:0006099,GO:0008964,GO:0015977,GO:0015979	cytoplasm|tricarboxylic acid cycle|phosphoenolpyruvate carboxylase activity|carbon fixation|photosynthesis
Cse_sc000496.1_g030.1	12.8495	28.0407	2.18225	0.0467067	Up	HERK1	Receptor-like protein kinase HERK 1
Cse_sc000498.1_g020.1	27.6623	56.0224	2.02522	0.018861	Up	At4g29530	Thiamine phosphate phosphatase-like protein	GO:0004427,GO:0009229,GO:0042131,GO:0046872,GO:0051262	inorganic diphosphatase activity|thiamine diphosphate biosynthetic process|thiamine phosphate phosphatase activity|metal ion binding|protein tetramerization
Cse_sc000498.1_g040.1	14.777	0	0	0.000786754	Down	Os02g0491600	Putative germin-like protein 2-1	GO:0005618,GO:0030145,GO:0045735,GO:0048046	cell wall|manganese ion binding|nutrient reservoir activity|apoplast
Cse_sc000498.1_g060.1	33.4979	1.94986	0.0582086	6.51479e-08	Down	Os02g0491600	Putative germin-like protein 2-1	GO:0005618,GO:0030145,GO:0045735,GO:0048046	cell wall|manganese ion binding|nutrient reservoir activity|apoplast
Cse_sc000498.1_g070.1	1933.29	335.09	0.173326	7.62034e-15	Down	SF21	Pollen-specific protein SF21
Cse_sc000499.1_g080.1	7.1989	0	0	0.00117179	Down	EPFL3	EPIDERMAL PATTERNING FACTOR-like protein 3	GO:0005576,GO:0010052,GO:0010374	extracellular region|guard cell differentiation|stomatal complex development
Cse_sc000500.1_g060.1	33.9718	14.8377	0.436764	0.0189814	Down	At1g13570	F-box/FBD/LRR-repeat protein At1g13570
Cse_sc000501.1_g070.1	44.6926	10.778	0.241159	5.22879e-05	Down	WIP2	Zinc finger protein WIP2	GO:0001709,GO:0003676,GO:0003700,GO:0005634,GO:0006355,GO:0009860,GO:0010468,GO:0010500,GO:0046872,GO:1990058	cell fate determination|nucleic acid binding|DNA-binding transcription factor activity|nucleus|regulation of transcription, DNA-templated|pollen tube growth|regulation of gene expression|transmitting tissue development|metal ion binding|fruit replum development
Cse_sc000503.1_g090.1	47.7217	7.51872	0.157553	8.30201e-07	Down	ATL4	E3 ubiquitin-protein ligase ATL4	GO:0004842,GO:0016021,GO:0016567,GO:0031625,GO:0046872	ubiquitin-protein transferase activity|integral component of membrane|protein ubiquitination|ubiquitin protein ligase binding|metal ion binding
Cse_sc000505.1_g030.1	10376.7	71499.7	6.89041	7.02328e-18	Up	ASD1	Alpha-L-arabinofuranosidase 1	GO:0005773,GO:0009044,GO:0009505,GO:0045493,GO:0046373,GO:0046556,GO:0048046	vacuole|xylan 1,4-beta-xylosidase activity|plant-type cell wall|xylan catabolic process|L-arabinose metabolic process|alpha-L-arabinofuranosidase activity|apoplast
Cse_sc000508.1_g070.1	90.4744	10.9075	0.12056	3.49854e-11	Down
Cse_sc000511.1_g050.1	32.4674	76.0952	2.34374	0.0274425	Up	EBS	Chromatin remodeling protein EBS	GO:0000976,GO:0003682,GO:0005634,GO:0006325,GO:0006355,GO:0009791,GO:0009845,GO:0009908,GO:0035064,GO:0035067,GO:0046872,GO:0048579,GO:2000028	transcription regulatory region sequence-specific DNA binding|chromatin binding|nucleus|chromatin organization|regulation of transcription, DNA-templated|post-embryonic development|seed germination|flower development|methylated histone binding|negative regulation of histone acetylation|metal ion binding|negative regulation of long-day photoperiodism, flowering|regulation of photoperiodism, flower…
Cse_sc000512.1_g020.1	124.936	279.387	2.23624	0.000411642	Up	PCKA	Phosphoenolpyruvate carboxykinase (ATP)	GO:0004612,GO:0005524,GO:0005634,GO:0005730,GO:0005829,GO:0006094,GO:0009817,GO:0016020,GO:0016036,GO:0046686	phosphoenolpyruvate carboxykinase (ATP) activity|ATP binding|nucleus|nucleolus|cytosol|gluconeogenesis|defense response to fungus, incompatible interaction|membrane|cellular response to phosphate starvation|response to cadmium ion
Cse_sc000515.1_g040.1	94.5442	41.2976	0.436807	0.00254304	Down	IDM1	Increased DNA methylation 1	GO:0004402,GO:0005634,GO:0009506,GO:0010385,GO:0042393,GO:0043971,GO:0043972,GO:0044030,GO:0044154,GO:0046872,GO:0080188	histone acetyltransferase activity|nucleus|plasmodesma|double-stranded methylated DNA binding|histone binding|histone H3-K18 acetylation|histone H3-K23 acetylation|regulation of DNA methylation|histone H3-K14 acetylation|metal ion binding|RNA-directed DNA methylation
Cse_sc000517.1_g090.1	14.1606	91.3247	6.44921	1.40931e-09	Up
Cse_sc000521.1_g060.1	720.026	280.622	0.389738	2.29864e-05	Down	At2g33170	Probable leucine-rich repeat receptor-like protein kinase At2g33170
Cse_sc000523.1_g040.1	235.798	477.134	2.02349	0.00200482	Up
Cse_sc000523.1_g080.1	17.9209	6.07259	0.338854	0.0243747	Down	YUC6	Indole-3-pyruvate monooxygenase YUCCA6	GO:0004499,GO:0005737,GO:0009851,GO:0050660,GO:0050661,GO:0103075	N,N-dimethylaniline monooxygenase activity|cytoplasm|auxin biosynthetic process|flavin adenine dinucleotide binding|NADP binding|indole-3-pyruvate monooxygenase activity
Cse_sc000524.1_g040.1	151.403	8.23095	0.0543646	1.04487e-12	Down	PER72	Peroxidase 72	GO:0004601,GO:0005576,GO:0006979,GO:0009809,GO:0020037,GO:0042744,GO:0046872	peroxidase activity|extracellular region|response to oxidative stress|lignin biosynthetic process|heme binding|hydrogen peroxide catabolic process|metal ion binding
Cse_sc000527.1_g030.1	196.726	871.439	4.4297	7.07567e-11	Up
Cse_sc000527.1_g060.1	111.705	43.6253	0.390539	0.0221222	Down
Cse_sc000528.1_g070.1	399.024	887.294	2.22366	0.000280898	Up	At1g27930	Probable methyltransferase At1g27930	GO:0000139,GO:0005768,GO:0005794,GO:0005802,GO:0008168,GO:0009834,GO:0016021,GO:0045491,GO:0045492	Golgi membrane|endosome|Golgi apparatus|trans-Golgi network|methyltransferase activity|plant-type secondary cell wall biogenesis|integral component of membrane|xylan metabolic process|xylan biosynthetic process
Cse_sc000531.1_g180.1	380.606	1247.39	3.27738	6.89734e-08	Up	TIC32	Short-chain dehydrogenase TIC 32, chloroplastic	GO:0005886,GO:0009507,GO:0009706,GO:0009941,GO:0015031,GO:0016491	plasma membrane|chloroplast|chloroplast inner membrane|chloroplast envelope|protein transport|oxidoreductase activity
Cse_sc000532.1_g120.1	27.4001	2.01463	0.0735263	5.90081e-07	Down	ETN8	Equilibrative nucleotide transporter 8	GO:0005337,GO:0005886,GO:0016021	nucleoside transmembrane transporter activity|plasma membrane|integral component of membrane
Cse_sc000534.1_g030.1	235.323	1.9966	0.00848451	3.04011e-07	Down	FAD3	Omega-3 fatty acid desaturase, endoplasmic reticulum	GO:0005789,GO:0006636,GO:0016021,GO:0016717	endoplasmic reticulum membrane|unsaturated fatty acid biosynthetic process|integral component of membrane|oxidoreductase activity, acting on paired donors, with oxidation of a pair of donors resulting in the reduction of molecular oxygen to two molecules of water
Cse_sc000539.1_g050.1	706.553	290.261	0.410812	0.00117352	Down
Cse_sc000539.1_g150.1	498.018	246.198	0.494356	0.00189627	Down	PME34	Probable pectinesterase/pectinesterase inhibitor 34	GO:0005886,GO:0009505,GO:0010119,GO:0016021,GO:0030599,GO:0042545,GO:0045330,GO:0045490,GO:0046910	plasma membrane|plant-type cell wall|regulation of stomatal movement|integral component of membrane|pectinesterase activity|cell wall modification|aspartyl esterase activity|pectin catabolic process|pectinesterase inhibitor activity
Cse_sc000541.1_g080.1	22.0859	2.05235	0.0929257	1.61098e-05	Down	Os03g0586800	Lysine--tRNA ligase	GO:0003676,GO:0004824,GO:0005524,GO:0005829,GO:0006430,GO:0009506	nucleic acid binding|lysine-tRNA ligase activity|ATP binding|cytosol|lysyl-tRNA aminoacylation|plasmodesma
Cse_sc000543.1_g030.1	49.5803	0.321973	0.00649397	9.67027e-16	Down	NAGS1	Probable amino-acid acetyltransferase NAGS1, chloroplastic	GO:0004042,GO:0006526,GO:0009507,GO:0103045	acetyl-CoA:L-glutamate N-acetyltransferase activity|arginine biosynthetic process|chloroplast|methione N-acyltransferase activity
Cse_sc000544.1_g080.1	0.861498	14.2371	16.526	0.000135097	Up
Cse_sc000547.1_g030.1	14.8445	4.15144	0.279662	0.0166789	Down	BHLH157	Transcription factor bHLH157	GO:0003677,GO:0003700,GO:0005634,GO:0007140,GO:0046983,GO:0048316,GO:0048364,GO:0051321,GO:0071365,GO:0090058	DNA binding|DNA-binding transcription factor activity|nucleus|male meiotic nuclear division|protein dimerization activity|seed development|root development|meiotic cell cycle|cellular response to auxin stimulus|metaxylem development
Cse_sc000548.1_g070.1	3.76802	0	0	0.0326345	Down	BHLH25	Transcription factor bHLH25	GO:0003677,GO:0003700,GO:0005634,GO:0006355,GO:0046983	DNA binding|DNA-binding transcription factor activity|nucleus|regulation of transcription, DNA-templated|protein dimerization activity
Cse_sc000550.1_g030.1	52.4935	25.8498	0.492439	0.0216421	Down	At2g39360	Probable receptor-like protein kinase At2g39360
Cse_sc000551.1_g060.1	177.669	0	0	1.40741e-37	Down	QH1	R-linalool synthase QH1, chloroplastic (Fragment)	GO:0000287,GO:0009507,GO:0009611,GO:0010333,GO:0016114,GO:0033383,GO:0034008	magnesium ion binding|chloroplast|response to wounding|terpene synthase activity|terpenoid biosynthetic process|geranyl diphosphate metabolic process|R-linalool synthase activity
Cse_sc000552.1_g040.1	63.8713	23.6299	0.369962	0.000768288	Down	Os03g0586800	Lysine--tRNA ligase	GO:0003676,GO:0004824,GO:0005524,GO:0005829,GO:0006430,GO:0009506	nucleic acid binding|lysine-tRNA ligase activity|ATP binding|cytosol|lysyl-tRNA aminoacylation|plasmodesma
Cse_sc000553.1_g090.1	139.023	64.2892	0.462437	0.00237624	Down	RD22	BURP domain protein RD22	GO:0005768,GO:0005794,GO:0005802,GO:0009651	endosome|Golgi apparatus|trans-Golgi network|response to salt stress
Cse_sc000556.1_g070.1	110.952	47.257	0.425922	0.00138373	Down	hh4	Histone H4	GO:0000786,GO:0003677,GO:0005634,GO:0006334,GO:0046982	nucleosome|DNA binding|nucleus|nucleosome assembly|protein heterodimerization activity
Cse_sc000557.1_g040.1	63.1131	135.264	2.1432	0.00242482	Up
Cse_sc000559.1_g090.1	128.266	47.5235	0.370507	0.000212318	Down	GG3	Guanine nucleotide-binding protein subunit gamma 3	GO:0005886,GO:0007186,GO:0009737	plasma membrane|G protein-coupled receptor signaling pathway|response to abscisic acid
Cse_sc000560.1_g070.1	889.517	261.34	0.2938	0.000518594	Down	HT1	Serine/threonine-protein kinase HT1	GO:0004674,GO:0005524	protein serine/threonine kinase activity|ATP binding
Cse_sc000561.1_g070.1	13.4584	0	0	4.11804e-06	Down
Cse_sc000564.1_g020.1	5.06087	16.9137	3.34205	0.0164386	Up	RHD3	Protein ROOT HAIR DEFECTIVE 3	GO:0000139,GO:0003924,GO:0005525,GO:0005737,GO:0005774,GO:0005783,GO:0005789,GO:0005886,GO:0006888,GO:0007029,GO:0009832,GO:0009932,GO:0010053,GO:0016021,GO:0016320,GO:0030036,GO:0048309	Golgi membrane|GTPase activity|GTP binding|cytoplasm|vacuolar membrane|endoplasmic reticulum|endoplasmic reticulum membrane|plasma membrane|ER to Golgi vesicle-mediated transport|endoplasmic reticulum organization|plant-type cell wall biogenesis|cell tip growth|root epidermal cell differentiation|integral component of membrane|endoplasmic reticulum membrane fusion|actin cytoskeleton organization|…
Cse_sc000565.1_g050.1	274.268	19.0003	0.0692764	4.53059e-12	Down
Cse_sc000566.1_g070.1	400.014	5.68586	0.0142142	4.38113e-14	Down	XTH2	Xyloglucan endotransglucosylase/hydrolase protein 2	GO:0004553,GO:0005618,GO:0010411,GO:0016762,GO:0042546,GO:0048046,GO:0071555	hydrolase activity, hydrolyzing O-glycosyl compounds|cell wall|xyloglucan metabolic process|xyloglucan:xyloglucosyl transferase activity|cell wall biogenesis|apoplast|cell wall organization
Cse_sc000570.1_g030.1	5.43263	0	0	0.00674878	Down	At4g18465	Probable pre-mRNA-splicing factor ATP-dependent RNA helicase DEAH9
Cse_sc000570.1_g060.1	3891.28	11122.8	2.8584	1.03269e-06	Up	DTX27	Protein DETOXIFICATION 27	GO:0006855,GO:0015238,GO:0015297,GO:0016021	drug transmembrane transport|drug transmembrane transporter activity|antiporter activity|integral component of membrane
Cse_sc000570.1_g080.1	277.219	665.608	2.40102	0.00336428	Up	At1g29880	Glycine--tRNA ligase, mitochondrial 1	GO:0004820,GO:0005524,GO:0005737,GO:0005739,GO:0005768,GO:0005794,GO:0005802,GO:0005829,GO:0006426,GO:0015966,GO:0046686,GO:0046983,GO:0070150	glycine-tRNA ligase activity|ATP binding|cytoplasm|mitochondrion|endosome|Golgi apparatus|trans-Golgi network|cytosol|glycyl-tRNA aminoacylation|diadenosine tetraphosphate biosynthetic process|response to cadmium ion|protein dimerization activity|mitochondrial glycyl-tRNA aminoacylation
Cse_sc000571.1_g080.1	15.9199	95.0168	5.96842	5.43372e-09	Up
Cse_sc000572.1_g040.1	54.3246	4.5759	0.0842325	0.00534588	Down	ROPGEF8	Rho guanine nucleotide exchange factor 8	GO:0005085,GO:0005089,GO:0005886,GO:0042802	guanyl-nucleotide exchange factor activity|Rho guanyl-nucleotide exchange factor activity|plasma membrane|identical protein binding
Cse_sc000573.1_g090.1	183.143	386.144	2.10843	0.00101053	Up
Cse_sc000576.1_g080.1	13.2741	131.198	9.88377	5.84645e-05	Up	ptaL	Oxidoreductase ptaL	GO:0016491	oxidoreductase activity
Cse_sc000577.1_g070.1	11.0342	30.458	2.76033	0.00999142	Up
Cse_sc000577.1_g110.1	1.90948	11.9205	6.2428	0.0123055	Up	OFP6	Transcription repressor OFP6	GO:0005634,GO:0045892	nucleus|negative regulation of transcription, DNA-templated
Cse_sc000578.1_g060.1	152.453	10.2079	0.0669574	1.30633e-05	Down	3GGT	Anthocyanidin 3-O-glucoside 2''-O-glucosyltransferase	GO:0009718,GO:0016758,GO:0043473,GO:0102455	anthocyanin-containing compound biosynthetic process|transferase activity, transferring hexosyl groups|pigmentation|anthocyanidin 3-O-glucoside 2''-O-glucosyltransferase activity
Cse_sc000580.1_g060.1	412.711	1602.14	3.88199	3.96827e-06	Up	At3g26840	Acyltransferase-like protein At3g26840, chloroplastic	GO:0004144,GO:0009507,GO:0010287,GO:0019432,GO:0033306	diacylglycerol O-acyltransferase activity|chloroplast|plastoglobule|triglyceride biosynthetic process|phytol metabolic process
Cse_sc000586.1_g060.1	35.3437	3.36728	0.0952724	2.23995e-07	Down
Cse_sc000586.1_g070.1	7.76383	153.985	19.8336	2.7002e-18	Up
Cse_sc000586.1_g080.1	16.9904	3.80977	0.22423	0.00454778	Down	SLAC1	Guard cell S-type anion channel SLAC1	GO:0005886,GO:0006820,GO:0006873,GO:0008308,GO:0008509,GO:0009270,GO:0009737,GO:0009738,GO:0010037,GO:0010118,GO:0010193,GO:0015698,GO:0015711,GO:0016021,GO:0019901,GO:0019903,GO:0050891,GO:0090332,GO:1902456	plasma membrane|anion transport|cellular ion homeostasis|voltage-gated anion channel activity|anion transmembrane transporter activity|response to humidity|response to abscisic acid|abscisic acid-activated signaling pathway|response to carbon dioxide|stomatal movement|response to ozone|inorganic anion transport|organic anion transport|integral component of membrane|protein kinase binding|protein …
Cse_sc000586.1_g100.1	397.987	125.987	0.31656	9.93071e-06	Down	At1g12500	Probable sugar phosphate/phosphate translocator At1g12500	GO:0008643,GO:0016021	carbohydrate transport|integral component of membrane
Cse_sc000588.1_g030.1	0	6.75426	Inf	0.00139885	Up	N	TMV resistance protein N	GO:0005524,GO:0005737,GO:0007165,GO:0009626,GO:0043531	ATP binding|cytoplasm|signal transduction|plant-type hypersensitive response|ADP binding
Cse_sc000589.1_g080.1	2.90652	11.3752	3.91369	0.0256582	Up	AHL16	AT-hook motif nuclear-localized protein 16	GO:0003680,GO:0003700,GO:0005634,GO:0010208,GO:0010228,GO:0010529,GO:0031490,GO:0035067,GO:1900111	AT DNA binding|DNA-binding transcription factor activity|nucleus|pollen wall assembly|vegetative to reproductive phase transition of meristem|negative regulation of transposition|chromatin DNA binding|negative regulation of histone acetylation|positive regulation of histone H3-K9 dimethylation
Cse_sc000591.1_g010.1	29.711	305.323	10.2764	5.91759e-06	Up
Cse_sc000591.1_g030.1	7.63793	70.0757	9.1747	2.03693e-10	Up
Cse_sc000594.1_g040.1	515.564	1087.83	2.10999	0.00305642	Up	MUB1	Membrane-anchored ubiquitin-fold protein 1	GO:0005886	plasma membrane
Cse_sc000595.1_g010.1	83.8858	1.98759	0.023694	8.55729e-08	Down	IQD1	Protein IQ-DOMAIN 1	GO:0005516,GO:0005634,GO:0005737,GO:0005874,GO:0008017	calmodulin binding|nucleus|cytoplasm|microtubule|microtubule binding
Cse_sc000597.1_g040.1	9.29267	27.3789	2.94629	0.0133504	Up	MPC1	Mitochondrial pyruvate carrier 1	GO:0005739,GO:0005774,GO:0005886,GO:0006850,GO:0010119,GO:0016020,GO:0031305,GO:0050833	mitochondrion|vacuolar membrane|plasma membrane|mitochondrial pyruvate transmembrane transport|regulation of stomatal movement|membrane|integral component of mitochondrial inner membrane|pyruvate transmembrane transporter activity
Cse_sc000597.1_g060.1	538.564	218.125	0.405013	5.26369e-05	Down	4CLL9	4-coumarate--CoA ligase-like 9	GO:0004321,GO:0005524,GO:0005777,GO:0009695,GO:0016874,GO:0031408	fatty-acyl-CoA synthase activity|ATP binding|peroxisome|jasmonic acid biosynthetic process|ligase activity|oxylipin biosynthetic process
Cse_sc000600.1_g030.1	192.884	34.552	0.179133	5.11657e-11	Down	SPL3	Squamosa promoter-binding-like protein 3	GO:0003677,GO:0005634,GO:0046872	DNA binding|nucleus|metal ion binding
Cse_sc000602.1_g070.1	669.574	247.085	0.369017	0.00547926	Down	FLA17	Fasciclin-like arabinogalactan protein 17	GO:0005576,GO:0005773	extracellular region|vacuole
Cse_sc000602.1_g080.1	20.8015	2.88158	0.138527	0.000117819	Down	UBP12	Ubiquitin carboxyl-terminal hydrolase 12	GO:0004197,GO:0004843,GO:0005634,GO:0005737,GO:0005829,GO:0006511,GO:0009867,GO:0016579,GO:0031647	cysteine-type endopeptidase activity|thiol-dependent ubiquitin-specific protease activity|nucleus|cytoplasm|cytosol|ubiquitin-dependent protein catabolic process|jasmonic acid mediated signaling pathway|protein deubiquitination|regulation of protein stability
Cse_sc000604.1_g010.1	229.474	983.568	4.2862	0.0251272	Up	PDR1	Pleiotropic drug resistance protein 1	GO:0005524,GO:0016021,GO:0016887	ATP binding|integral component of membrane|ATPase activity
Cse_sc000604.1_g030.1	370.894	105.447	0.284304	0.0262724	Down	AOP1.2	Probable 2-oxoglutarate-dependent dioxygenase AOP1.2	GO:0046872,GO:0051213	metal ion binding|dioxygenase activity
Cse_sc000604.1_g050.1	2549.93	984.727	0.386179	8.86759e-06	Down	ISS1	Aromatic aminotransferase ISS1	GO:0004838,GO:0005737,GO:0005829,GO:0006555,GO:0006558,GO:0006568,GO:0006569,GO:0006570,GO:0008483,GO:0009072,GO:0009641,GO:0009693,GO:0009698,GO:0009851,GO:0010252,GO:0010326,GO:0010366,GO:0030170,GO:0050362,GO:1901997	L-tyrosine:2-oxoglutarate aminotransferase activity|cytoplasm|cytosol|methionine metabolic process|L-phenylalanine metabolic process|tryptophan metabolic process|tryptophan catabolic process|tyrosine metabolic process|transaminase activity|aromatic amino acid family metabolic process|shade avoidance|ethylene biosynthetic process|phenylpropanoid metabolic process|auxin biosynthetic process|auxin h…
Cse_sc000605.1_g090.1	119.715	50.5879	0.42257	0.00104672	Down	CESA8	Cellulose synthase A catalytic subunit 8 [UDP-forming]	GO:0005618,GO:0005794,GO:0005802,GO:0005886,GO:0006970,GO:0009414,GO:0009833,GO:0009834,GO:0016021,GO:0016759,GO:0016760,GO:0030244,GO:0042742,GO:0046872,GO:0050832,GO:0071555	cell wall|Golgi apparatus|trans-Golgi network|plasma membrane|response to osmotic stress|response to water deprivation|plant-type primary cell wall biogenesis|plant-type secondary cell wall biogenesis|integral component of membrane|cellulose synthase activity|cellulose synthase (UDP-forming) activity|cellulose biosynthetic process|defense response to bacterium|metal ion binding|defense response t…
Cse_sc000607.1_g110.1	1.53773	16.2409	10.5616	0.000148723	Up	At3g26560	Probable pre-mRNA-splicing factor ATP-dependent RNA helicase DEAH5
Cse_sc000608.1_g040.1	39.5404	19.414	0.490992	0.0386499	Down	CTR1	Serine/threonine-protein kinase CTR1	GO:0001666,GO:0004674,GO:0004712,GO:0005524,GO:0005789,GO:0009686,GO:0009723,GO:0009744,GO:0009750,GO:0009873,GO:0010105,GO:0010182,GO:0046777,GO:0048510,GO:0071281,GO:2000035,GO:2000069	response to hypoxia|protein serine/threonine kinase activity|protein serine/threonine/tyrosine kinase activity|ATP binding|endoplasmic reticulum membrane|gibberellin biosynthetic process|response to ethylene|response to sucrose|response to fructose|ethylene-activated signaling pathway|negative regulation of ethylene-activated signaling pathway|sugar mediated signaling pathway|protein autophosphor…
Cse_sc000610.1_g060.1	194.491	413.315	2.12511	0.0138404	Up	At2g38610	KH domain-containing protein At2g38610	GO:0003729,GO:0005634,GO:0005829	mRNA binding|nucleus|cytosol
Cse_sc000612.1_g010.1	932.238	1961.15	2.10371	0.000504417	Up	ABCG24	ABC transporter G family member 24	GO:0005524,GO:0005886,GO:0016021,GO:0042626,GO:0055085	ATP binding|plasma membrane|integral component of membrane|ATPase activity, coupled to transmembrane movement of substances|transmembrane transport
Cse_sc000614.1_g050.1	32.3094	1220.3	37.7694	9.73328e-09	Up
Cse_sc000615.1_g030.1	22.0499	9.33022	0.423142	0.0357316	Down	MAPKKK18	Mitogen-activated protein kinase kinase kinase 18	GO:0004672,GO:0004674,GO:0004709,GO:0005524,GO:0005634,GO:0005737,GO:0006970,GO:0009737,GO:0009738,GO:0009789,GO:0023014,GO:0031098,GO:0032147,GO:0046777,GO:1900057,GO:1902457,GO:2000038	protein kinase activity|protein serine/threonine kinase activity|MAP kinase kinase kinase activity|ATP binding|nucleus|cytoplasm|response to osmotic stress|response to abscisic acid|abscisic acid-activated signaling pathway|positive regulation of abscisic acid-activated signaling pathway|signal transduction by protein phosphorylation|stress-activated protein kinase signaling cascade|activation of…
Cse_sc000617.1_g130.1	6.1759	0	0	0.00296077	Down	PATL5	Patellin-5	GO:0007049,GO:0008289,GO:0009507,GO:0016020,GO:0051301	cell cycle|lipid binding|chloroplast|membrane|cell division
Cse_sc000619.1_g020.1	88.1678	1.68364	0.0190959	1.18244e-12	Down	STP7	Sugar transport protein 7	GO:0005351,GO:0005355,GO:0005886,GO:0005887,GO:0008645,GO:0012505,GO:0042882,GO:0042900,GO:0090406	carbohydrate:proton symporter activity|glucose transmembrane transporter activity|plasma membrane|integral component of plasma membrane|hexose transmembrane transport|endomembrane system|L-arabinose transmembrane transport|arabinose transmembrane transporter activity|pollen tube
Cse_sc000620.1_g020.1	48.2251	126.635	2.62591	0.000293311	Up	At4g27190	Disease resistance protein At4g27190
Cse_sc000623.1_g030.1	41.0039	18.3456	0.447412	0.0184795	Down	T85	Auxin-binding protein T85	GO:0005788,GO:0008270,GO:0009734,GO:0010011	endoplasmic reticulum lumen|zinc ion binding|auxin-activated signaling pathway|auxin binding
Cse_sc000623.1_g090.1	64.4673	23.123	0.358678	0.000901656	Down	At3g51720	WEB family protein At3g51720	GO:0005829,GO:0009903,GO:0009904	cytosol|chloroplast avoidance movement|chloroplast accumulation movement
Cse_sc000623.1_g100.1	459.091	5.27208	0.0114837	1.06508e-09	Down	GATL4	Probable galacturonosyltransferase-like 4	GO:0000139,GO:0005794,GO:0016021,GO:0045489,GO:0047262,GO:0071555,GO:0090406	Golgi membrane|Golgi apparatus|integral component of membrane|pectin biosynthetic process|polygalacturonate 4-alpha-galacturonosyltransferase activity|cell wall organization|pollen tube
Cse_sc000626.1_g010.1	12.5803	0.321973	0.0255933	0.0102656	Down	GATA9	GATA transcription factor 9	GO:0003700,GO:0005634,GO:0007623,GO:0008270,GO:0009416,GO:0043565,GO:0045893	DNA-binding transcription factor activity|nucleus|circadian rhythm|zinc ion binding|response to light stimulus|sequence-specific DNA binding|positive regulation of transcription, DNA-templated
Cse_sc000628.1_g040.1	4.49398	0	0	0.0398188	Down	FRS5	Protein FAR1-RELATED SEQUENCE 5	GO:0005634,GO:0006355,GO:0008270	nucleus|regulation of transcription, DNA-templated|zinc ion binding
Cse_sc000628.1_g070.1	8.60011	25.3101	2.94299	0.0121491	Up	ERF5	Ethylene-responsive transcription factor 5	GO:0003677,GO:0003700,GO:0005634,GO:0006952,GO:0009873	DNA binding|DNA-binding transcription factor activity|nucleus|defense response|ethylene-activated signaling pathway
Cse_sc000629.1_g050.1	46.7636	127.979	2.73672	0.000162832	Up	ASAT1	Acyl-CoA--sterol O-acyltransferase 1	GO:0008374,GO:0016021,GO:0016127,GO:0034434	O-acyltransferase activity|integral component of membrane|sterol catabolic process|sterol esterification
Cse_sc000630.1_g100.1	0.287166	9.04246	31.4886	0.000744403	Up	XA21	Receptor kinase-like protein Xa21	GO:0004674,GO:0005524,GO:0005634,GO:0005789,GO:0005886,GO:0006952,GO:0016021,GO:0031349,GO:0046777,GO:1900426	protein serine/threonine kinase activity|ATP binding|nucleus|endoplasmic reticulum membrane|plasma membrane|defense response|integral component of membrane|positive regulation of defense response|protein autophosphorylation|positive regulation of defense response to bacterium
Cse_sc000636.1_g070.1	7.0636	39.7827	5.63206	0.000138234	Up
Cse_sc000637.1_g030.1	24.409	5.34937	0.219156	0.000555927	Down	NPR2	BTB/POZ domain and ankyrin repeat-containing protein NPR2	GO:0005634,GO:0042742,GO:0050832,GO:2000022	nucleus|defense response to bacterium|defense response to fungus|regulation of jasmonic acid mediated signaling pathway
Cse_sc000639.1_g090.1	38.0155	11.6218	0.305711	0.00471946	Down	HPR3	Glyoxylate/hydroxypyruvate reductase HPR3	GO:0005829,GO:0009853,GO:0009854,GO:0016618,GO:0030267,GO:0051287	cytosol|photorespiration|oxidative photosynthetic carbon pathway|hydroxypyruvate reductase activity|glyoxylate reductase (NADP) activity|NAD binding
Cse_sc000639.1_g110.1	21.6308	6.92701	0.320238	0.0149933	Down	HPR3	Glyoxylate/hydroxypyruvate reductase HPR3	GO:0005829,GO:0009853,GO:0009854,GO:0016618,GO:0030267,GO:0051287	cytosol|photorespiration|oxidative photosynthetic carbon pathway|hydroxypyruvate reductase activity|glyoxylate reductase (NADP) activity|NAD binding
Cse_sc000639.1_g140.1	63.2237	533.522	8.43864	3.10276e-18	Up	SGR1	Protein STAY-GREEN 1, chloroplastic	GO:0009535,GO:0015996	chloroplast thylakoid membrane|chlorophyll catabolic process
Cse_sc000639.1_g170.1	372.469	1420.96	3.81499	1.70898e-09	Up	SGR1	Protein STAY-GREEN 1, chloroplastic	GO:0009535,GO:0015996	chloroplast thylakoid membrane|chlorophyll catabolic process
Cse_sc000641.1_g030.1	418.41	924.651	2.20991	0.000328781	Up	GAI	DELLA protein GAI	GO:0003700,GO:0003713,GO:0005634,GO:0006808,GO:0007275,GO:0009723,GO:0009737,GO:0009739,GO:0009740,GO:0009863,GO:0009867,GO:0009938,GO:0009939,GO:0010187,GO:0010218,GO:0010233,GO:0010336,GO:0010628,GO:0010629,GO:0033206,GO:0042538,GO:0043565,GO:1900033,GO:1903508,GO:1905614,GO:1905622,GO:2000033,GO:2000377	DNA-binding transcription factor activity|transcription coactivator activity|nucleus|regulation of nitrogen utilization|multicellular organism development|response to ethylene|response to abscisic acid|response to gibberellin|gibberellic acid mediated signaling pathway|salicylic acid mediated signaling pathway|jasmonic acid mediated signaling pathway|negative regulation of gibberellic acid mediat…
Cse_sc000642.1_g060.1	34.0309	146.196	4.29597	2.58873e-06	Up	GT-3B	Trihelix transcription factor GT-3b	GO:0003700,GO:0005634,GO:0005730,GO:0006355,GO:0016592,GO:0043565	DNA-binding transcription factor activity|nucleus|nucleolus|regulation of transcription, DNA-templated|mediator complex|sequence-specific DNA binding
Cse_sc000643.1_g020.1	187.942	39.11	0.208096	0.0171164	Down		Alcohol-forming fatty acyl-CoA reductase	GO:0006629,GO:0080019,GO:0102965	lipid metabolic process|fatty-acyl-CoA reductase (alcohol-forming) activity|alcohol-forming fatty acyl-CoA reductase activity
Cse_sc000644.1_g030.1	191.763	2.32759	0.0121378	6.36793e-08	Down	CPK13	Calcium-dependent protein kinase 13	GO:0004683,GO:0005509,GO:0005524,GO:0005634,GO:0005737,GO:0009409,GO:0009414,GO:0009738,GO:0009931,GO:0016020,GO:0018105,GO:0035556,GO:1901002	calmodulin-dependent protein kinase activity|calcium ion binding|ATP binding|nucleus|cytoplasm|response to cold|response to water deprivation|abscisic acid-activated signaling pathway|calcium-dependent protein serine/threonine kinase activity|membrane|peptidyl-serine phosphorylation|intracellular signal transduction|positive regulation of response to salt stress
Cse_sc000644.1_g060.1	915.671	4721.95	5.15682	1.63849e-13	Up	PATL3	Patellin-3	GO:0005737,GO:0005886,GO:0007049,GO:0008289,GO:0051301	cytoplasm|plasma membrane|cell cycle|lipid binding|cell division
Cse_sc000646.1_g060.1	1.96909	20.157	10.2367	2.27778e-05	Up	At3g47570	Probable LRR receptor-like serine/threonine-protein kinase At3g47570
Cse_sc000648.1_g050.1	635.801	1401.49	2.20429	0.000263859	Up	SIS8	Probable serine/threonine-protein kinase SIS8	GO:0004674,GO:0004712,GO:0005524,GO:0005634,GO:0009651,GO:0010182	protein serine/threonine kinase activity|protein serine/threonine/tyrosine kinase activity|ATP binding|nucleus|response to salt stress|sugar mediated signaling pathway
Cse_sc000650.1_g060.1	150.226	19.1171	0.127256	3.30927e-05	Down	INV1	Beta-fructofuranosidase, insoluble isoenzyme 1	GO:0004564,GO:0005576,GO:0005618,GO:0005975	beta-fructofuranosidase activity|extracellular region|cell wall|carbohydrate metabolic process
Cse_sc000651.1_g030.1	2846.29	7695.1	2.70356	0.0116838	Up	XTH23	Probable xyloglucan endotransglucosylase/hydrolase protein 23	GO:0004553,GO:0005618,GO:0005794,GO:0010411,GO:0016762,GO:0042546,GO:0048046,GO:0071555	hydrolase activity, hydrolyzing O-glycosyl compounds|cell wall|Golgi apparatus|xyloglucan metabolic process|xyloglucan:xyloglucosyl transferase activity|cell wall biogenesis|apoplast|cell wall organization
Cse_sc000651.1_g090.1	1095.5	2685.57	2.45146	0.00690055	Up	XTH23	Probable xyloglucan endotransglucosylase/hydrolase protein 23	GO:0004553,GO:0005618,GO:0005794,GO:0010411,GO:0016762,GO:0042546,GO:0048046,GO:0071555	hydrolase activity, hydrolyzing O-glycosyl compounds|cell wall|Golgi apparatus|xyloglucan metabolic process|xyloglucan:xyloglucosyl transferase activity|cell wall biogenesis|apoplast|cell wall organization
Cse_sc000651.1_g110.1	7007.48	17153.9	2.44794	0.0129418	Up	XTH23	Probable xyloglucan endotransglucosylase/hydrolase protein 23	GO:0004553,GO:0005618,GO:0005794,GO:0010411,GO:0016762,GO:0042546,GO:0048046,GO:0071555	hydrolase activity, hydrolyzing O-glycosyl compounds|cell wall|Golgi apparatus|xyloglucan metabolic process|xyloglucan:xyloglucosyl transferase activity|cell wall biogenesis|apoplast|cell wall organization
Cse_sc000652.1_g060.1	47.5323	6.93053	0.145807	3.29468e-07	Down	CYP716A17	Beta-amyrin 28-monooxygenase	GO:0005506,GO:0016021,GO:0016135,GO:0016709,GO:0020037	iron ion binding|integral component of membrane|saponin biosynthetic process|oxidoreductase activity, acting on paired donors, with incorporation or reduction of molecular oxygen, NAD(P)H as one donor, and incorporation of one atom of oxygen|heme binding
Cse_sc000652.1_g080.1	1426.62	4835.72	3.38963	0.0045781	Up	ECT4	YTH domain-containing protein ECT4	GO:0003723,GO:0005737	RNA binding|cytoplasm
Cse_sc000653.1_g060.1	22.6672	0	0	0.00017773	Down	At5g03795	Probable glycosyltransferase At5g03795	GO:0000139,GO:0006486,GO:0016021,GO:0016757,GO:0071555	Golgi membrane|protein glycosylation|integral component of membrane|transferase activity, transferring glycosyl groups|cell wall organization
Cse_sc000653.1_g100.1	184.434	1.28789	0.00698294	0.00113736	Down	At5g03820	GDSL esterase/lipase At5g03820	GO:0005576,GO:0016042,GO:0016298	extracellular region|lipid catabolic process|lipase activity
Cse_sc000654.1_g050.1	176.46	71.4377	0.404838	0.0002784	Down	CYP82A3	Cytochrome P450 82A3	GO:0005506,GO:0016020,GO:0016709,GO:0020037,GO:0042343	iron ion binding|membrane|oxidoreductase activity, acting on paired donors, with incorporation or reduction of molecular oxygen, NAD(P)H as one donor, and incorporation of one atom of oxygen|heme binding|indole glucosinolate metabolic process
Cse_sc000655.1_g030.1	37.8066	3.3763	0.0893045	1.10254e-06	Down	RABA1F	Ras-related protein RABA1f	GO:0003924,GO:0005525,GO:0005768,GO:0005886,GO:0006886,GO:0032482	GTPase activity|GTP binding|endosome|plasma membrane|intracellular protein transport|Rab protein signal transduction
Cse_sc000657.1_g060.1	1456.18	5676.22	3.89801	4.15985e-10	Up	CBK1	Serine/threonine-protein kinase CBK1	GO:0004674,GO:0005524	protein serine/threonine kinase activity|ATP binding
Cse_sc000659.1_g040.1	41.2332	13.0933	0.317542	0.012199	Down	SPAC26H5.07c	Uncharacterized protein C26H5.07c	GO:0005737,GO:0005887,GO:0007166,GO:0038023	cytoplasm|integral component of plasma membrane|cell surface receptor signaling pathway|signaling receptor activity
Cse_sc000659.1_g050.1	313.711	685.437	2.18493	0.000287917	Up	EXO70A1	Exocyst complex component EXO70A1	GO:0000145,GO:0005576,GO:0005618,GO:0005829,GO:0005856,GO:0005886,GO:0006887,GO:0009524	exocyst|extracellular region|cell wall|cytosol|cytoskeleton|plasma membrane|exocytosis|phragmoplast
Cse_sc000659.1_g060.1	22.2871	0.321973	0.0144466	2.30112e-07	Down	PRK3	Pollen receptor-like kinase 3	GO:0004674,GO:0005524,GO:0009506,GO:0016021,GO:0080092	protein serine/threonine kinase activity|ATP binding|plasmodesma|integral component of membrane|regulation of pollen tube growth
Cse_sc000660.1_g020.1	243.327	10.1486	0.0417076	5.56864e-05	Down	CNGC18	Cyclic nucleotide-gated ion channel 18	GO:0005262,GO:0005516,GO:0006874,GO:0009860,GO:0016021,GO:0016324,GO:0030552,GO:0030553,GO:0030659	calcium channel activity|calmodulin binding|cellular calcium ion homeostasis|pollen tube growth|integral component of membrane|apical plasma membrane|cAMP binding|cGMP binding|cytoplasmic vesicle membrane
Cse_sc000661.1_g060.1	30.3069	103.915	3.42877	1.13111e-05	Up	CRK15	Cysteine-rich receptor-like protein kinase 15	GO:0004674,GO:0005524,GO:0016021	protein serine/threonine kinase activity|ATP binding|integral component of membrane
Cse_sc000661.1_g070.1	27.5003	88.4226	3.21533	0.00342921	Up	CRK25	Cysteine-rich receptor-like protein kinase 25
Cse_sc000662.1_g140.1	5.66885	23.4844	4.14271	0.00156647	Up	N	TMV resistance protein N	GO:0005524,GO:0005737,GO:0007165,GO:0009626,GO:0043531	ATP binding|cytoplasm|signal transduction|plant-type hypersensitive response|ADP binding
Cse_sc000663.1_g110.1	146.855	66.4188	0.452274	0.00164819	Down	PTAC5	Protein disulfide isomerase pTAC5, chloroplastic	GO:0003756,GO:0006355,GO:0009295,GO:0009408,GO:0009416,GO:0009507,GO:0009508,GO:0009534,GO:0009535,GO:0009658,GO:0009941,GO:0042644,GO:0042793,GO:0046872	protein disulfide isomerase activity|regulation of transcription, DNA-templated|nucleoid|response to heat|response to light stimulus|chloroplast|plastid chromosome|chloroplast thylakoid|chloroplast thylakoid membrane|chloroplast organization|chloroplast envelope|chloroplast nucleoid|plastid transcription|metal ion binding
Cse_sc000666.1_g020.1	116.885	460.714	3.9416	5.63434e-09	Up	At4g00750	Probable methyltransferase PMT15	GO:0000139,GO:0005768,GO:0005774,GO:0005794,GO:0005802,GO:0008757,GO:0016021,GO:0052546	Golgi membrane|endosome|vacuolar membrane|Golgi apparatus|trans-Golgi network|S-adenosylmethionine-dependent methyltransferase activity|integral component of membrane|cell wall pectin metabolic process
Cse_sc000666.1_g070.1	120.881	43.843	0.362696	0.000141146	Down	EMS1	Leucine-rich repeat receptor protein kinase EMS1
Cse_sc000668.1_g030.1	15.7144	3.28449	0.209011	0.0287379	Down	CYP96A15	Alkane hydroxylase MAH1	GO:0005506,GO:0005783,GO:0005789,GO:0010025,GO:0016021,GO:0020037,GO:0080133	iron ion binding|endoplasmic reticulum|endoplasmic reticulum membrane|wax biosynthetic process|integral component of membrane|heme binding|midchain alkane hydroxylase activity
Cse_sc000669.1_g030.1	567.547	124.144	0.218738	6.67871e-11	Down	ACR8	ACT domain-containing protein ACR8	GO:0009737,GO:0016597	response to abscisic acid|amino acid binding
Cse_sc000676.1_g130.1	21.8096	0	0	1.91549e-06	Down	TL1	Thaumatin-like protein 1	GO:0005576	extracellular region
Cse_sc000677.1_g030.1	4.78236	0.321973	0.067325	0.0399955	Down	LCB2a	Long chain base biosynthesis protein 2a	GO:0004758,GO:0005773,GO:0005783,GO:0005789,GO:0009555,GO:0009640,GO:0016020,GO:0016021,GO:0030170,GO:0043067,GO:0046512	serine C-palmitoyltransferase activity|vacuole|endoplasmic reticulum|endoplasmic reticulum membrane|pollen development|photomorphogenesis|membrane|integral component of membrane|pyridoxal phosphate binding|regulation of programmed cell death|sphingosine biosynthetic process
Cse_sc000679.1_g040.1	341.729	145.106	0.424624	0.00121175	Down	NPR4	Ankyrin repeat-containing protein NPR4	GO:0005886,GO:0016020,GO:0016021	plasma membrane|membrane|integral component of membrane
Cse_sc000679.1_g080.1	30.2811	12.5912	0.41581	0.0213397	Down	NPR4	Ankyrin repeat-containing protein NPR4	GO:0005886,GO:0016020,GO:0016021	plasma membrane|membrane|integral component of membrane
Cse_sc000681.1_g060.1	198.745	452.52	2.27689	0.000332428	Up	HO1	Heme oxygenase 1, chloroplastic	GO:0004392,GO:0006788,GO:0009507,GO:0009813,GO:0010019,GO:0010024,GO:0010075,GO:0010119,GO:0015979,GO:0016117,GO:0020037,GO:0046872,GO:0071494	heme oxygenase (decyclizing) activity|heme oxidation|chloroplast|flavonoid biosynthetic process|chloroplast-nucleus signaling pathway|phytochromobilin biosynthetic process|regulation of meristem growth|regulation of stomatal movement|photosynthesis|carotenoid biosynthetic process|heme binding|metal ion binding|cellular response to UV-C
Cse_sc000682.1_g070.1	9229.39	1931.24	0.209249	1.38278e-12	Down		Non-specific lipid-transfer protein	GO:0006869,GO:0008289	lipid transport|lipid binding
Cse_sc000684.1_g040.1	106.753	249.188	2.33425	0.00325326	Up	Ot07g01880	Probable alanine--tRNA ligase, chloroplastic/mitochondrial	GO:0000049,GO:0004813,GO:0005524,GO:0005739,GO:0006419,GO:0008270,GO:0009507	tRNA binding|alanine-tRNA ligase activity|ATP binding|mitochondrion|alanyl-tRNA aminoacylation|zinc ion binding|chloroplast
Cse_sc000689.1_g050.1	24.1194	1.13317	0.0469817	0.00131285	Down
Cse_sc000689.1_g060.1	28.9893	9.15563	0.315828	0.00475404	Down	IQD31	Protein IQ-DOMAIN 31	GO:0005829,GO:0005875,GO:0005886	cytosol|microtubule associated complex|plasma membrane
Cse_sc000689.1_g080.1	80.9152	1.78613	0.0220741	1.01913e-05	Down	ARB_05372	Probable aldose 1-epimerase ARB_05372	GO:0004034,GO:0005576,GO:0019318,GO:0030246	aldose 1-epimerase activity|extracellular region|hexose metabolic process|carbohydrate binding
Cse_sc000695.1_g050.1	330.674	135.704	0.410387	0.000126013	Down
Cse_sc000695.1_g070.1	14.8791	1.88862	0.126931	0.000578561	Down		Histone H2A	GO:0000786,GO:0003677,GO:0005634,GO:0046982	nucleosome|DNA binding|nucleus|protein heterodimerization activity
Cse_sc000696.1_g030.1	7.9847	19.8312	2.48364	0.038689	Up	SAT1	Serine acetyltransferase 1, chloroplastic	GO:0005634,GO:0005829,GO:0006535,GO:0009001,GO:0009409,GO:0009507,GO:0009970	nucleus|cytosol|cysteine biosynthetic process from serine|serine O-acetyltransferase activity|response to cold|chloroplast|cellular response to sulfate starvation
Cse_sc000697.1_g060.1	42.1007	16.5879	0.394006	0.00472642	Down	CHUP1	Protein CHUP1, chloroplastic	GO:0009507,GO:0009707,GO:0009902	chloroplast|chloroplast outer membrane|chloroplast relocation
Cse_sc000699.1_g050.1	240.724	12.7765	0.0530753	1.21495e-05	Down	GRF12	14-3-3-like protein GF14 iota	GO:0005634,GO:0005737,GO:0019904	nucleus|cytoplasm|protein domain specific binding
Cse_sc000699.1_g060.1	46.5819	9.87687	0.212032	0.0286235	Down	psaB	Photosystem I P700 chlorophyll a apoprotein A2	GO:0000287,GO:0009055,GO:0009522,GO:0009535,GO:0015979,GO:0016021,GO:0016168,GO:0018298,GO:0051539	magnesium ion binding|electron transfer activity|photosystem I|chloroplast thylakoid membrane|photosynthesis|integral component of membrane|chlorophyll binding|protein-chromophore linkage|4 iron, 4 sulfur cluster binding
Cse_sc000700.1_g040.1	43.6261	18.2967	0.419399	0.00948552	Down
Cse_sc000700.1_g110.1	46.5197	22.639	0.486653	0.0228552	Down	TON2	Probable serine/threonine-protein phosphatase 2A regulatory subunit B'' subunit TON2	GO:0000226,GO:0000913,GO:0005509,GO:0005634,GO:0005737,GO:0005813,GO:0005819,GO:0009524,GO:0009826,GO:0030865	microtubule cytoskeleton organization|preprophase band assembly|calcium ion binding|nucleus|cytoplasm|centrosome|spindle|phragmoplast|unidimensional cell growth|cortical cytoskeleton organization
Cse_sc000702.1_g070.1	307.578	1630	5.29946	2.19385e-13	Up
Cse_sc000703.1_g080.1	46.7013	0.983945	0.0210689	3.81857e-06	Down	ATJ10	Chaperone protein dnaJ 10
Cse_sc000710.1_g010.1	56.8969	2.42106	0.0425517	1.23406e-08	Down
Cse_sc000716.1_g010.1	146.22	309.788	2.11865	0.00120847	Up	RKF3	Probable LRR receptor-like serine/threonine-protein kinase RKF3
Cse_sc000716.1_g070.1	53.4566	8.90743	0.166629	5.21054e-07	Down	At2g48060/At2g48040/At2g48050	Piezo-type mechanosensitive ion channel homolog	GO:0006811,GO:0008381,GO:0016021	ion transport|mechanosensitive ion channel activity|integral component of membrane
Cse_sc000716.1_g120.1	128.118	3.0166	0.0235454	1.33085e-23	Down	ALKBH10B	RNA demethylase ALKBH10B	GO:0003729,GO:0006402,GO:0010228,GO:0032451,GO:0046872,GO:0051213,GO:0080167,GO:1990931	mRNA binding|mRNA catabolic process|vegetative to reproductive phase transition of meristem|demethylase activity|metal ion binding|dioxygenase activity|response to karrikin|RNA N6-methyladenosine dioxygenase activity
Cse_sc000721.1_g100.1	173.626	33.0326	0.190252	0.0347406	Down	LBD1	LOB domain-containing protein 1	GO:0005739	mitochondrion
Cse_sc000723.1_g040.1	25.4882	107.067	4.20066	7.30857e-07	Up	MTP10	Metal tolerance protein 10	GO:0005774,GO:0008324,GO:0016021	vacuolar membrane|cation transmembrane transporter activity|integral component of membrane
Cse_sc000724.1_g020.1	63.1525	144.273	2.28452	0.00995069	Up	STY46	Serine/threonine-protein kinase STY46	GO:0004674,GO:0004712,GO:0005524,GO:0005829,GO:0009658	protein serine/threonine kinase activity|protein serine/threonine/tyrosine kinase activity|ATP binding|cytosol|chloroplast organization
Cse_sc000726.1_g010.1	570.999	16.5128	0.0289191	4.69096e-11	Down	PAT08	Protein S-acyltransferase 8	GO:0005783,GO:0005794,GO:0005886,GO:0006612,GO:0016021,GO:0018230,GO:0019706	endoplasmic reticulum|Golgi apparatus|plasma membrane|protein targeting to membrane|integral component of membrane|peptidyl-L-cysteine S-palmitoylation|protein-cysteine S-palmitoyltransferase activity
Cse_sc000726.1_g020.1	12.6902	35.4675	2.79488	0.00448572	Up	HSP15.7	15.7 kDa heat shock protein, peroxisomal	GO:0000302,GO:0005782,GO:0006457,GO:0009408,GO:0009651,GO:0042542,GO:0043621,GO:0051082,GO:0051259	response to reactive oxygen species|peroxisomal matrix|protein folding|response to heat|response to salt stress|response to hydrogen peroxide|protein self-association|unfolded protein binding|protein complex oligomerization
Cse_sc000726.1_g030.1	19.9054	59.024	2.96523	0.000524736	Up
Cse_sc000726.1_g040.1	1640.88	796.698	0.485531	0.000866889	Down	XTHB	Probable xyloglucan endotransglucosylase/hydrolase protein B	GO:0004553,GO:0005618,GO:0010411,GO:0016762,GO:0042546,GO:0048046,GO:0071555	hydrolase activity, hydrolyzing O-glycosyl compounds|cell wall|xyloglucan metabolic process|xyloglucan:xyloglucosyl transferase activity|cell wall biogenesis|apoplast|cell wall organization
Cse_sc000728.1_g030.1	1544.65	3123.54	2.02217	0.00328555	Up
Cse_sc000732.1_g040.1	58.0494	0	0	1.82138e-06	Down	MYB101	Transcription factor MYB101	GO:0003700,GO:0005634,GO:0009555,GO:0009739,GO:0009740,GO:0009789,GO:0010468,GO:0030154,GO:0043068,GO:0043565,GO:0044212,GO:0045893,GO:0048235,GO:0080092,GO:0090406,GO:1901371,GO:1990019	DNA-binding transcription factor activity|nucleus|pollen development|response to gibberellin|gibberellic acid mediated signaling pathway|positive regulation of abscisic acid-activated signaling pathway|regulation of gene expression|cell differentiation|positive regulation of programmed cell death|sequence-specific DNA binding|transcription regulatory region DNA binding|positive regulation of tran…
Cse_sc000734.1_g100.1	122.702	33.5592	0.273502	2.28706e-06	Down
Cse_sc000735.1_g050.1	13.2385	4.37994	0.330848	0.0461135	Down	At1g13570	F-box/FBD/LRR-repeat protein At1g13570
Cse_sc000738.1_g040.1	13619.2	31578.3	2.31865	6.88189e-05	Up		Glutamine synthetase	GO:0004356,GO:0005524,GO:0005737,GO:0006542	glutamate-ammonia ligase activity|ATP binding|cytoplasm|glutamine biosynthetic process
Cse_sc000738.1_g060.1	157.522	26.1757	0.166171	0.00713951	Down	At5g66900	Probable disease resistance protein At5g66900
Cse_sc000741.1_g050.1	5213.54	10603.3	2.03381	0.000824739	Up	PMA4	Plasma membrane ATPase 4	GO:0005524,GO:0005886,GO:0008553,GO:0016021,GO:0046872,GO:0120029	ATP binding|plasma membrane|proton-exporting ATPase activity, phosphorylative mechanism|integral component of membrane|metal ion binding|proton export across plasma membrane
Cse_sc000743.1_g050.1	35.6823	178.191	4.99383	7.03286e-10	Up	GRDP1	Glycine-rich domain-containing protein 1	GO:0005886,GO:0009738,GO:0009787,GO:0071470	plasma membrane|abscisic acid-activated signaling pathway|regulation of abscisic acid-activated signaling pathway|cellular response to osmotic stress
Cse_sc000743.1_g060.1	1325.09	2831.16	2.13657	0.000413853	Up	At5g64460	Phosphoglycerate mutase-like protein 1	GO:0005829	cytosol
Cse_sc000744.1_g040.1	1.96909	15.4998	7.87157	0.00824433	Up	GLR3.1	Glutamate receptor 3.1	GO:0004970,GO:0005262,GO:0005622,GO:0005886,GO:0006816,GO:0008066,GO:0016021,GO:0019722,GO:0071230	ionotropic glutamate receptor activity|calcium channel activity|intracellular|plasma membrane|calcium ion transport|glutamate receptor activity|integral component of membrane|calcium-mediated signaling|cellular response to amino acid stimulus
Cse_sc000745.1_g060.1	9.53974	24.017	2.51757	0.0250208	Up	RLK1	G-type lectin S-receptor-like serine/threonine-protein kinase RLK1
Cse_sc000745.1_g070.1	10.2746	29.9709	2.91699	0.00558399	Up	RLK1	G-type lectin S-receptor-like serine/threonine-protein kinase RLK1
Cse_sc000746.1_g080.1	90.3305	275.588	3.05089	3.89577e-06	Up	SPAC589.09	CRAL-TRIO domain-containing protein C589.09, mitochondrial	GO:0005739,GO:0120010,GO:0120014	mitochondrion|intermembrane phospholipid transfer|intermembrane phospholipid transfer activity
Cse_sc000749.1_g060.1	33.5015	12.9277	0.385883	0.0106306	Down	At5g65820	Putative pentatricopeptide repeat-containing protein At5g65820
Cse_sc000751.1_g020.1	28.1088	65.1111	2.3164	0.00482674	Up	ERD4	CSC1-like protein ERD4	GO:0006811,GO:0016021,GO:0031969	ion transport|integral component of membrane|chloroplast membrane
Cse_sc000753.1_g020.1	15.6125	0	0	0.000256733	Down		Mitochondrial outer membrane protein porin of 36 kDa	GO:0005741,GO:0008308,GO:0015288,GO:0046930	mitochondrial outer membrane|voltage-gated anion channel activity|porin activity|pore complex
Cse_sc000753.1_g030.1	489.275	1243.21	2.54091	0.000840162	Up
Cse_sc000753.1_g070.1	34.5418	2.26634	0.0656114	1.12312e-08	Down	YAB4	Axial regulator YABBY 4	GO:0003677,GO:0003700,GO:0005634,GO:0009944,GO:0045165,GO:0046872,GO:0048481	DNA binding|DNA-binding transcription factor activity|nucleus|polarity specification of adaxial/abaxial axis|cell fate commitment|metal ion binding|plant ovule development
Cse_sc000753.1_g080.1	24.7464	4.7847	0.19335	0.000362982	Down
Cse_sc000758.1_g020.1	15.3031	38.3654	2.50704	0.00686642	Up	CSLG1	Cellulose synthase-like protein G1	GO:0000139,GO:0005794,GO:0005802,GO:0005886,GO:0009833,GO:0016021,GO:0016759,GO:0016760,GO:0030244,GO:0071555	Golgi membrane|Golgi apparatus|trans-Golgi network|plasma membrane|plant-type primary cell wall biogenesis|integral component of membrane|cellulose synthase activity|cellulose synthase (UDP-forming) activity|cellulose biosynthetic process|cell wall organization
Cse_sc000758.1_g040.1	39.7596	5.36388	0.134908	9.40044e-07	Down	ETR2	Ethylene receptor 2	GO:0000155,GO:0004674,GO:0005524,GO:0005783,GO:0005789,GO:0010105,GO:0016021,GO:0038199,GO:0046872,GO:0051740	phosphorelay sensor kinase activity|protein serine/threonine kinase activity|ATP binding|endoplasmic reticulum|endoplasmic reticulum membrane|negative regulation of ethylene-activated signaling pathway|integral component of membrane|ethylene receptor activity|metal ion binding|ethylene binding
Cse_sc000759.1_g030.1	305.597	625.956	2.04831	0.00129344	Up
Cse_sc000760.1_g040.1	67.6625	9.51717	0.140657	2.31723e-08	Down	At1g67340	F-box protein At1g67340	GO:0005634,GO:0016567	nucleus|protein ubiquitination
Cse_sc000761.1_g050.1	449.995	2705.11	6.01141	0.000785566	Up
Cse_sc000763.1_g120.1	83.1635	168.824	2.03002	0.00390785	Up	SAC8	Phosphoinositide phosphatase SAC8	GO:0005783,GO:0005789,GO:0016021,GO:0043812,GO:0046856	endoplasmic reticulum|endoplasmic reticulum membrane|integral component of membrane|phosphatidylinositol-4-phosphate phosphatase activity|phosphatidylinositol dephosphorylation
Cse_sc000766.1_g060.1	55.2341	15.1525	0.274331	0.0172379	Down	BSL1	Serine/threonine-protein phosphatase BSL1	GO:0004721,GO:0005634,GO:0005886,GO:0009742,GO:0046872	phosphoprotein phosphatase activity|nucleus|plasma membrane|brassinosteroid mediated signaling pathway|metal ion binding
Cse_sc000767.1_g040.1	799.726	3035.09	3.79516	0.0100091	Up	SPAC167.05	Uncharacterized protein C167.05	GO:0003824,GO:0005829	catalytic activity|cytosol
Cse_sc000767.1_g070.1	18.3699	5.8728	0.319698	0.0180258	Down	PME11	Putative pectinesterase 11	GO:0005618,GO:0016021,GO:0030599,GO:0042545,GO:0045330,GO:0045490	cell wall|integral component of membrane|pectinesterase activity|cell wall modification|aspartyl esterase activity|pectin catabolic process
Cse_sc000770.1_g070.1	46.1472	155.689	3.37375	0.00198079	Up		Retrovirus-related Pol polyprotein from transposon TNT 1-94	GO:0000943,GO:0003676,GO:0003964,GO:0004190,GO:0004519,GO:0008270,GO:0015074	retrotransposon nucleocapsid|nucleic acid binding|RNA-directed DNA polymerase activity|aspartic-type endopeptidase activity|endonuclease activity|zinc ion binding|DNA integration
Cse_sc000772.1_g060.1	0.676231	11.4113	16.8748	0.0003931	Up	FAD4	Fatty acid desaturase 4, chloroplastic	GO:0006636,GO:0009507,GO:0016021,GO:0031969,GO:0046471,GO:0052637,GO:0080167	unsaturated fatty acid biosynthetic process|chloroplast|integral component of membrane|chloroplast membrane|phosphatidylglycerol metabolic process|delta 3-trans-hexadecenoic acid phosphatidylglycerol desaturase activity|response to karrikin
Cse_sc000775.1_g040.1	0.912448	11.4652	12.5653	0.000852119	Up	OFP6	Transcription repressor OFP6	GO:0005634,GO:0045892	nucleus|negative regulation of transcription, DNA-templated
Cse_sc000776.1_g040.1	10.6464	25.2092	2.36788	0.0303028	Up	At1g80550	Pentatricopeptide repeat-containing protein At1g80550, mitochondrial
Cse_sc000779.1_g020.1	6.2778	0	0	0.00283886	Down	PPC4-2	Probable protein phosphatase 2C 21	GO:0004722,GO:0005886,GO:0009737,GO:0046872	protein serine/threonine phosphatase activity|plasma membrane|response to abscisic acid|metal ion binding
Cse_sc000779.1_g060.1	314.001	3.30604	0.0105287	1.25604e-08	Down	WIT1	WPP domain-interacting tail-anchored protein 1	GO:0005635,GO:0016021,GO:0031965	nuclear envelope|integral component of membrane|nuclear membrane
Cse_sc000779.1_g090.1	33.7096	84.4472	2.50514	0.00124534	Up	At5g15710	F-box/kelch-repeat protein At5g15710	GO:0004842,GO:0031146	ubiquitin-protein transferase activity|SCF-dependent proteasomal ubiquitin-dependent protein catabolic process
Cse_sc000781.1_g020.1	356.881	66.3035	0.185786	1.09357e-05	Down	Os03g0328900	Zinc finger CCCH domain-containing protein 22	GO:0003677,GO:0003723,GO:0046872	DNA binding|RNA binding|metal ion binding
Cse_sc000787.1_g010.1	114.096	49.0989	0.430328	0.00152851	Down	ZFN2	Zinc finger CCCH domain-containing protein 26	GO:0003677,GO:0005634,GO:0046872	DNA binding|nucleus|metal ion binding
Cse_sc000787.1_g020.1	13.0357	3.39951	0.260784	0.0131203	Down
Cse_sc000788.1_g030.1	25.9965	0	0	3.82722e-07	Down	RH35	DEAD-box ATP-dependent RNA helicase 35	GO:0003723,GO:0004386,GO:0005524,GO:0008270	RNA binding|helicase activity|ATP binding|zinc ion binding
Cse_sc000788.1_g050.1	16.6607	4.14076	0.248534	0.00691444	Down	CSE	Caffeoylshikimate esterase	GO:0003846,GO:0004622,GO:0005783,GO:0005794,GO:0005886,GO:0006979,GO:0009506,GO:0009809,GO:0010043,GO:0016020,GO:0016787,GO:0042542,GO:0046686,GO:0090430	2-acylglycerol O-acyltransferase activity|lysophospholipase activity|endoplasmic reticulum|Golgi apparatus|plasma membrane|response to oxidative stress|plasmodesma|lignin biosynthetic process|response to zinc ion|membrane|hydrolase activity|response to hydrogen peroxide|response to cadmium ion|caffeoyl-CoA: alcohol caffeoyl transferase activity
Cse_sc000792.1_g040.1	1179.77	3643.4	3.08822	1.76131e-07	Up	RSH2	Probable GTP diphosphokinase RSH2, chloroplastic	GO:0005524,GO:0005525,GO:0008728,GO:0009507,GO:0009611,GO:0009737,GO:0015969,GO:0016301	ATP binding|GTP binding|GTP diphosphokinase activity|chloroplast|response to wounding|response to abscisic acid|guanosine tetraphosphate metabolic process|kinase activity
Cse_sc000792.1_g070.1	725	3169.22	4.37134	2.88897e-11	Up
Cse_sc000792.1_g090.1	0.625281	7.57447	12.1137	0.00803408	Up	GRF5	Growth-regulating factor 5	GO:0005524,GO:0005634,GO:0006351,GO:0006355,GO:0048366	ATP binding|nucleus|transcription, DNA-templated|regulation of transcription, DNA-templated|leaf development
Cse_sc000794.1_g050.1	1.95178	10.6233	5.44288	0.0201322	Up	CES101	G-type lectin S-receptor-like serine/threonine-protein kinase CES101
Cse_sc000797.1_g030.1	4.68047	0	0	0.013082	Down	ITN1	Ankyrin repeat-containing protein ITN1	GO:0005634,GO:0005886,GO:0009651,GO:0016020,GO:0016021,GO:0034613	nucleus|plasma membrane|response to salt stress|membrane|integral component of membrane|cellular protein localization
Cse_sc000797.1_g070.1	11.4665	1.32395	0.115462	0.00731768	Down	At3g48880	F-box/LRR-repeat protein At3g48880
Cse_sc000798.1_g070.1	30.0841	0	0	2.14275e-06	Down	Ub-CEP52-1	Ubiquitin-60S ribosomal protein L40-1	GO:0003735,GO:0005634,GO:0005737,GO:0005840,GO:0006412,GO:0016567,GO:0019941,GO:0031386,GO:0031625	structural constituent of ribosome|nucleus|cytoplasm|ribosome|translation|protein ubiquitination|modification-dependent protein catabolic process|protein tag|ubiquitin protein ligase binding
Cse_sc000799.1_g010.1	5.2214	0	0	0.0149242	Down	At1g65750	Putative ribonuclease H protein At1g65750	GO:0003676,GO:0004523,GO:0046872	nucleic acid binding|RNA-DNA hybrid ribonuclease activity|metal ion binding
Cse_sc000802.1_g030.1	687.523	10.8808	0.0158261	4.22607e-24	Down	ABCG39	ABC transporter G family member 39	GO:0000302,GO:0005524,GO:0005886,GO:0006855,GO:0016021,GO:0042626,GO:0055085	response to reactive oxygen species|ATP binding|plasma membrane|drug transmembrane transport|integral component of membrane|ATPase activity, coupled to transmembrane movement of substances|transmembrane transport
Cse_sc000804.1_g010.1	23.621	1.30592	0.0552863	0.000311189	Down	ANN5	Annexin D5	GO:0005509,GO:0005543,GO:0005544,GO:0009408,GO:0009409,GO:0009414,GO:0009555,GO:0009639,GO:0009651,GO:0009846,GO:0009860,GO:0051015	calcium ion binding|phospholipid binding|calcium-dependent phospholipid binding|response to heat|response to cold|response to water deprivation|pollen development|response to red or far red light|response to salt stress|pollen germination|pollen tube growth|actin filament binding
Cse_sc000805.1_g060.1	282.626	2.73235	0.00966772	1.53774e-08	Down	AMC4	Metacaspase-4	GO:0004197,GO:0005737,GO:0005829,GO:0005886,GO:0006952,GO:0008234,GO:0009506,GO:0016540,GO:0042802,GO:0043068	cysteine-type endopeptidase activity|cytoplasm|cytosol|plasma membrane|defense response|cysteine-type peptidase activity|plasmodesma|protein autoprocessing|identical protein binding|positive regulation of programmed cell death
Cse_sc000805.1_g070.1	10206.4	21443.1	2.10094	0.000410665	Up	CALS1	Callose synthase 1	GO:0000148,GO:0003843,GO:0005886,GO:0006075,GO:0008360,GO:0009504,GO:0009506,GO:0016021,GO:0071555	1,3-beta-D-glucan synthase complex|1,3-beta-D-glucan synthase activity|plasma membrane|(1->3)-beta-D-glucan biosynthetic process|regulation of cell shape|cell plate|plasmodesma|integral component of membrane|cell wall organization
Cse_sc000808.1_g040.1	113.981	22.6518	0.198734	0.000295779	Down	FLZ14	FCS-Like Zinc finger 14	GO:0005634,GO:0005737,GO:0009744,GO:0009749,GO:0042594,GO:0046872,GO:1905582	nucleus|cytoplasm|response to sucrose|response to glucose|response to starvation|metal ion binding|response to mannose
Cse_sc000810.1_g050.1	222.392	469.792	2.11245	0.0213589	Up	UBP20	Ubiquitin carboxyl-terminal hydrolase 20	GO:0004197,GO:0004843,GO:0006511,GO:0016579	cysteine-type endopeptidase activity|thiol-dependent ubiquitin-specific protease activity|ubiquitin-dependent protein catabolic process|protein deubiquitination
Cse_sc000812.1_g100.1	348.508	824.984	2.36719	8.38502e-05	Up	PUB3	U-box domain-containing protein 3	GO:0004842,GO:0005634,GO:0005737	ubiquitin-protein transferase activity|nucleus|cytoplasm
Cse_sc000813.1_g110.1	99.357	781.842	7.86901	0.00834509	Up	RGL2	DELLA protein RGL2
Cse_sc000814.1_g090.1	265.899	125.607	0.472387	0.00169759	Down	IBS1	Protein IMPAIRED IN BABA-INDUCED STERILITY 1
Cse_sc000817.1_g090.1	276.07	72.9862	0.264376	4.9427e-08	Down	At1g25530	Lysine histidine transporter-like 6	GO:0003333,GO:0005886,GO:0015171,GO:0016021	amino acid transmembrane transport|plasma membrane|amino acid transmembrane transporter activity|integral component of membrane
Cse_sc000820.1_g060.1	3541.15	186.281	0.0526047	7.76039e-09	Down	co-2	Polyphenol oxidase II, chloroplastic	GO:0004097,GO:0009543,GO:0046148,GO:0046872	catechol oxidase activity|chloroplast thylakoid lumen|pigment biosynthetic process|metal ion binding
Cse_sc000826.1_g010.1	3.211	33.8825	10.552	0.048882	Up	At2g23790	Calcium uniporter protein 2, mitochondrial	GO:0005262,GO:0005743,GO:0015292,GO:0016021,GO:0051560	calcium channel activity|mitochondrial inner membrane|uniporter activity|integral component of membrane|mitochondrial calcium ion homeostasis
Cse_sc000827.1_g020.1	16.8881	0	0	2.2834e-05	Down	RE1	Retrovirus-related Pol polyprotein from transposon RE1	GO:0000943,GO:0003676,GO:0003964,GO:0004190,GO:0004519,GO:0006310,GO:0015074,GO:0046872	retrotransposon nucleocapsid|nucleic acid binding|RNA-directed DNA polymerase activity|aspartic-type endopeptidase activity|endonuclease activity|DNA recombination|DNA integration|metal ion binding
Cse_sc000827.1_g040.1	4.82344	0	0	0.0182128	Down	PVA22	Vesicle-associated protein 2-2	GO:0005789,GO:0005886,GO:0016021,GO:0016032,GO:0046907	endoplasmic reticulum membrane|plasma membrane|integral component of membrane|viral process|intracellular transport
Cse_sc000827.1_g090.1	762.511	1733.24	2.27307	0.000141695	Up	ATR3	NADPH-dependent diflavin oxidoreductase 1	GO:0003958,GO:0005634,GO:0005737,GO:0005829,GO:0009793,GO:0010181,GO:0016226,GO:0016491,GO:0016651,GO:0050660,GO:0050661	NADPH-hemoprotein reductase activity|nucleus|cytoplasm|cytosol|embryo development ending in seed dormancy|FMN binding|iron-sulfur cluster assembly|oxidoreductase activity|oxidoreductase activity, acting on NAD(P)H|flavin adenine dinucleotide binding|NADP binding
Cse_sc000828.1_g060.1	8.75418	0	0	0.00032279	Down
Cse_sc000828.1_g110.1	909.191	95.6103	0.10516	4.23291e-10	Down		Ribonuclease MC	GO:0003723,GO:0033897	RNA binding|ribonuclease T2 activity
Cse_sc000829.1_g070.1	7.65524	27.861	3.63946	0.001542	Up	GUX5	Putative UDP-glucuronate:xylan alpha-glucuronosyltransferase 5	GO:0000139,GO:0005794,GO:0016021,GO:0016757,GO:0046872,GO:0071555	Golgi membrane|Golgi apparatus|integral component of membrane|transferase activity, transferring glycosyl groups|metal ion binding|cell wall organization
Cse_sc000830.1_g090.1	16.8895	42.7348	2.53026	0.00607132	Up	GLR1.2	Glutamate receptor 1.2	GO:0004970,GO:0005262,GO:0005622,GO:0005886,GO:0006816,GO:0008066,GO:0016021,GO:0019722,GO:0071230	ionotropic glutamate receptor activity|calcium channel activity|intracellular|plasma membrane|calcium ion transport|glutamate receptor activity|integral component of membrane|calcium-mediated signaling|cellular response to amino acid stimulus
Cse_sc000833.1_g050.1	232.306	35.8274	0.154225	9.26045e-13	Down
Cse_sc000834.1_g090.1	725.492	209.508	0.28878	2.82025e-08	Down	DET2	Steroid 5-alpha-reductase DET2	GO:0003865,GO:0005737,GO:0016021,GO:0016132,GO:0047751,GO:0050213,GO:0055114,GO:0090377,GO:0090378	3-oxo-5-alpha-steroid 4-dehydrogenase activity|cytoplasm|integral component of membrane|brassinosteroid biosynthetic process|cholestenone 5-alpha-reductase activity|progesterone 5-alpha-reductase activity|oxidation-reduction process|seed trichome initiation|seed trichome elongation
Cse_sc000838.1_g010.1	1695.98	291.536	0.171899	7.80391e-15	Down	KNAT6	Homeobox protein knotted-1-like 6	GO:0003700,GO:0005634,GO:0010073,GO:0043565	DNA-binding transcription factor activity|nucleus|meristem maintenance|sequence-specific DNA binding
Cse_sc000839.1_g070.1	548.545	1241.19	2.26269	0.00253208	Up	ATG8C	Autophagy-related protein 8C	GO:0000421,GO:0005874,GO:0006914,GO:0006995,GO:0015031,GO:0031410	autophagosome membrane|microtubule|autophagy|cellular response to nitrogen starvation|protein transport|cytoplasmic vesicle
Cse_sc000844.1_g040.1	116.373	41.0387	0.352646	8.92791e-05	Down	SGRL	Protein STAY-GREEN LIKE, chloroplastic	GO:0009507,GO:0009658	chloroplast|chloroplast organization
Cse_sc000844.1_g080.1	693.158	1764.72	2.54592	1.7857e-05	Up	ALDH3H1	Aldehyde dehydrogenase family 3 member H1	GO:0004028,GO:0004029,GO:0005773,GO:0005783,GO:0005794,GO:0006081,GO:0009269,GO:0009506,GO:0009536,GO:0009651,GO:0009737,GO:0016020,GO:0043878	3-chloroallyl aldehyde dehydrogenase activity|aldehyde dehydrogenase (NAD) activity|vacuole|endoplasmic reticulum|Golgi apparatus|cellular aldehyde metabolic process|response to desiccation|plasmodesma|plastid|response to salt stress|response to abscisic acid|membrane|glyceraldehyde-3-phosphate dehydrogenase (NAD+) (non-phosphorylating) activity
Cse_sc000845.1_g030.1	433.701	1088.59	2.51	3.12853e-05	Up
Cse_sc000846.1_g120.1	26.4528	8.22576	0.31096	0.00415861	Down
Cse_sc000848.1_g030.1	292.801	40.3043	0.137651	9.1838e-15	Down	UGT75C1	UDP-glycosyltransferase 75C1	GO:0008194,GO:0043231,GO:0080043,GO:0080044	UDP-glycosyltransferase activity|intracellular membrane-bounded organelle|quercetin 3-O-glucosyltransferase activity|quercetin 7-O-glucosyltransferase activity
Cse_sc000849.1_g050.1	147.804	69.1011	0.46752	0.00317002	Down	LOX2.1	Linoleate 13S-lipoxygenase 2-1, chloroplastic	GO:0009534,GO:0009570,GO:0010597,GO:0016165,GO:0031408,GO:0046872	chloroplast thylakoid|chloroplast stroma|green leaf volatile biosynthetic process|linoleate 13S-lipoxygenase activity|oxylipin biosynthetic process|metal ion binding
Cse_sc000850.1_g020.1	596.228	1855.44	3.11197	1.89091e-07	Up	ATG18G	Autophagy-related protein 18g	GO:0005737,GO:0005774,GO:0006914,GO:0015031,GO:0034045,GO:0042594	cytoplasm|vacuolar membrane|autophagy|protein transport|phagophore assembly site membrane|response to starvation
Cse_sc000851.1_g030.1	2030.57	584.113	0.287659	4.66707e-06	Down	DRT100	DNA damage-repair/toleration protein DRT100	GO:0000166,GO:0006281,GO:0009507	nucleotide binding|DNA repair|chloroplast
Cse_sc000852.1_g020.1	3892.71	572.327	0.147026	2.45855e-09	Down	SLAH3	S-type anion channel SLAH3	GO:0005886,GO:0006821,GO:0006873,GO:0008308,GO:0009414,GO:0009651,GO:0016021	plasma membrane|chloride transport|cellular ion homeostasis|voltage-gated anion channel activity|response to water deprivation|response to salt stress|integral component of membrane
Cse_sc000852.1_g030.1	10.6528	56.4158	5.29586	0.000205856	Up	MAKR6	Probable membrane-associated kinase regulator 6	GO:0005886,GO:0009738	plasma membrane|abscisic acid-activated signaling pathway
Cse_sc000852.1_g080.1	7.28251	196.198	26.941	3.06929e-10	Up	At5g24080	G-type lectin S-receptor-like serine/threonine-protein kinase At5g24080
Cse_sc000853.1_g060.1	0.338115	180.367	533.45	0.000160686	Up	MIK2	MDIS1-interacting receptor like kinase 2
Cse_sc000855.1_g010.1	24.9934	74.4663	2.97944	0.000202781	Up	UGT85A24	7-deoxyloganetin glucosyltransferase	GO:0035251	UDP-glucosyltransferase activity
Cse_sc000857.1_g030.1	1.52042	8.4037	5.52722	0.0304017	Up
Cse_sc000860.1_g020.1	8.46603	0.699696	0.0826475	0.00568363	Down	MORC6	Protein MICRORCHIDIA 6	GO:0003677,GO:0003723,GO:0004519,GO:0005524,GO:0005634,GO:0006281,GO:0006282,GO:0006325,GO:0006952,GO:0009506,GO:0009941,GO:0016887,GO:0031935,GO:0042803,GO:0080188,GO:1902290	DNA binding|RNA binding|endonuclease activity|ATP binding|nucleus|DNA repair|regulation of DNA repair|chromatin organization|defense response|plasmodesma|chloroplast envelope|ATPase activity|regulation of chromatin silencing|protein homodimerization activity|RNA-directed DNA methylation|positive regulation of defense response to oomycetes
Cse_sc000863.1_g070.1	1323.59	95.9691	0.0725069	3.32165e-16	Down	RAB11C	Ras-related protein Rab11C	GO:0003924,GO:0005525,GO:0005886	GTPase activity|GTP binding|plasma membrane
Cse_sc000863.1_g100.1	306.915	957.685	3.12036	2.76004e-07	Up
Cse_sc000863.1_g110.1	25.2126	72.5565	2.87779	0.000236103	Up	UGT709C2	7-deoxyloganetic acid glucosyltransferase	GO:0035251,GO:0102970,GO:1900994	UDP-glucosyltransferase activity|7-deoxyloganetic acid glucosyltransferase activity|(-)-secologanin biosynthetic process
Cse_sc000866.1_g070.1	87.4015	8.6664	0.0991562	6.37706e-07	Down	WIP2	Zinc finger protein WIP2	GO:0001709,GO:0003676,GO:0003700,GO:0005634,GO:0006355,GO:0009860,GO:0010468,GO:0010500,GO:0046872,GO:1990058	cell fate determination|nucleic acid binding|DNA-binding transcription factor activity|nucleus|regulation of transcription, DNA-templated|pollen tube growth|regulation of gene expression|transmitting tissue development|metal ion binding|fruit replum development
Cse_sc000868.1_g040.1	2.44152	32.9187	13.4829	7.29365e-08	Up	MAPKKK17	Mitogen-activated protein kinase kinase kinase 17	GO:0004674,GO:0004709,GO:0005524,GO:0005634,GO:0005737,GO:0006970,GO:0009737,GO:0009738,GO:0023014,GO:0031098,GO:0032147	protein serine/threonine kinase activity|MAP kinase kinase kinase activity|ATP binding|nucleus|cytoplasm|response to osmotic stress|response to abscisic acid|abscisic acid-activated signaling pathway|signal transduction by protein phosphorylation|stress-activated protein kinase signaling cascade|activation of protein kinase activity
Cse_sc000868.1_g060.1	0	10.6198	Inf	3.7792e-05	Up	MAPKKK17	Mitogen-activated protein kinase kinase kinase 17	GO:0004674,GO:0004709,GO:0005524,GO:0005634,GO:0005737,GO:0006970,GO:0009737,GO:0009738,GO:0023014,GO:0031098,GO:0032147	protein serine/threonine kinase activity|MAP kinase kinase kinase activity|ATP binding|nucleus|cytoplasm|response to osmotic stress|response to abscisic acid|abscisic acid-activated signaling pathway|signal transduction by protein phosphorylation|stress-activated protein kinase signaling cascade|activation of protein kinase activity
Cse_sc000871.1_g030.1	507.819	1059.05	2.08549	0.0325569	Up
Cse_sc000871.1_g050.1	41.4124	0.321973	0.00777479	0.00265864	Down	OPT2	Oligopeptide transporter 2	GO:0005886,GO:0005887,GO:0015031,GO:0016020,GO:0035673	plasma membrane|integral component of plasma membrane|protein transport|membrane|oligopeptide transmembrane transporter activity
Cse_sc000875.1_g040.1	34.1491	15.8273	0.463475	0.0255721	Down
Cse_sc000875.1_g050.1	104.548	2.6766	0.0256017	2.00869e-11	Down	At4g15060	Putative F-box/LRR-repeat protein At4g15060
Cse_sc000876.1_g020.1	231.446	102.138	0.441305	0.000451729	Down		Transcription factor MYB1R1	GO:0003677,GO:0005634,GO:0005829	DNA binding|nucleus|cytosol
Cse_sc000876.1_g050.1	151.942	26.1052	0.171811	0.00590089	Down	At4g09670	Uncharacterized oxidoreductase At4g09670	GO:0005829,GO:0016491	cytosol|oxidoreductase activity
Cse_sc000877.1_g030.1	10.0609	2.21059	0.21972	0.044427	Down
Cse_sc000877.1_g140.1	209.823	2.40136	0.0114447	1.49435e-09	Down	At5g47540	Putative MO25-like protein At5g47540	GO:0005622,GO:0023014	intracellular|signal transduction by protein phosphorylation
Cse_sc000878.1_g020.1	125.002	39.4807	0.315842	1.43011e-05	Down	SEC14	SEC14 cytosolic factor	GO:0000139,GO:0005829,GO:0006896,GO:0008525,GO:0008526,GO:0030437,GO:0043001,GO:0046488,GO:0048194,GO:1901352,GO:2001246	Golgi membrane|cytosol|Golgi to vacuole transport|phosphatidylcholine transporter activity|phosphatidylinositol transporter activity|ascospore formation|Golgi to plasma membrane protein transport|phosphatidylinositol metabolic process|Golgi vesicle budding|negative regulation of phosphatidylglycerol biosynthetic process|negative regulation of phosphatidylcholine biosynthetic process
Cse_sc000879.1_g050.1	65.5341	30.874	0.471114	0.0375714	Down
Cse_sc000883.1_g040.1	8.37999	0	0	0.0258781	Down	ATL60	RING-H2 finger protein ATL60	GO:0005886,GO:0016021,GO:0016567,GO:0016740,GO:0046872	plasma membrane|integral component of membrane|protein ubiquitination|transferase activity|metal ion binding
Cse_sc000883.1_g080.1	8.10391	0.377723	0.04661	0.0043285	Down	PME15	Probable pectinesterase 15	GO:0005576,GO:0005618,GO:0030599,GO:0042545,GO:0045330,GO:0045490	extracellular region|cell wall|pectinesterase activity|cell wall modification|aspartyl esterase activity|pectin catabolic process
Cse_sc000884.1_g010.1	125.656	2.28085	0.0181515	6.81426e-08	Down	TRM32	Protein TRM32
Cse_sc000884.1_g040.1	18.4352	2.72334	0.147725	0.0115949	Down	SCPL6	Serine carboxypeptidase-like 6	GO:0004185,GO:0005576,GO:0019748	serine-type carboxypeptidase activity|extracellular region|secondary metabolic process
Cse_sc000885.1_g050.1	301.513	1025.19	3.40015	6.30657e-05	Up	WRKY6	WRKY transcription factor 6	GO:0003700,GO:0005634,GO:0009873,GO:0010200,GO:0016036,GO:0043565,GO:0044212,GO:0045892,GO:0080169	DNA-binding transcription factor activity|nucleus|ethylene-activated signaling pathway|response to chitin|cellular response to phosphate starvation|sequence-specific DNA binding|transcription regulatory region DNA binding|negative regulation of transcription, DNA-templated|cellular response to boron-containing substance deprivation
Cse_sc000885.1_g070.1	22.313	2.04334	0.091576	0.000215378	Down	SLAH1	S-type anion channel SLAH1	GO:0005886,GO:0006821,GO:0006873,GO:0008308,GO:0009414,GO:0009651,GO:0016021,GO:1901529	plasma membrane|chloride transport|cellular ion homeostasis|voltage-gated anion channel activity|response to water deprivation|response to salt stress|integral component of membrane|positive regulation of anion channel activity
Cse_sc000886.1_g010.1	57.2158	11.9222	0.208372	4.9394e-06	Down	COI1	Coronatine-insensitive protein 1	GO:0006952,GO:0009611,GO:0009625,GO:0009641,GO:0009753,GO:0009861,GO:0009867,GO:0009901,GO:0009909,GO:0010118,GO:0010218,GO:0016567,GO:0019005,GO:0031146,GO:0031348,GO:0042742,GO:0048364,GO:0048443,GO:0050832	defense response|response to wounding|response to insect|shade avoidance|response to jasmonic acid|jasmonic acid and ethylene-dependent systemic resistance|jasmonic acid mediated signaling pathway|anther dehiscence|regulation of flower development|stomatal movement|response to far red light|protein ubiquitination|SCF ubiquitin ligase complex|SCF-dependent proteasomal ubiquitin-dependent protein c…
Cse_sc000889.1_g020.1	20.8755	0	0	1.11784e-07	Down	TYDC1	Tyrosine/DOPA decarboxylase 1	GO:0004058,GO:0004837,GO:0006520,GO:0030170	aromatic-L-amino-acid decarboxylase activity|tyrosine decarboxylase activity|cellular amino acid metabolic process|pyridoxal phosphate binding
Cse_sc000893.1_g020.1	5204.63	4.59041	0.000881987	5.70516e-90	Down	CXE2	Probable carboxylesterase 2	GO:0052689	carboxylic ester hydrolase activity
Cse_sc000893.1_g060.1	77.1226	0	0	5.05815e-23	Down	CXE2	Probable carboxylesterase 2	GO:0052689	carboxylic ester hydrolase activity
Cse_sc000893.1_g070.1	37.4818	0	0	8.47068e-14	Down	CXE12	Probable carboxylesterase 12	GO:0005737,GO:0005829,GO:0052689	cytoplasm|cytosol|carboxylic ester hydrolase activity
Cse_sc000902.1_g060.1	24.6143	69.8784	2.83894	0.000329202	Up	APG	GDSL esterase/lipase APG	GO:0016042,GO:0016788,GO:0048046	lipid catabolic process|hydrolase activity, acting on ester bonds|apoplast
Cse_sc000902.1_g070.1	67.8203	25.9021	0.381922	0.00140802	Down	PAB6	Polyadenylate-binding protein 6	GO:0003723,GO:0003730,GO:0005634,GO:0005737,GO:0005829,GO:0006413,GO:0006417,GO:0008143,GO:0008266,GO:0016071,GO:1990904	RNA binding|mRNA 3'-UTR binding|nucleus|cytoplasm|cytosol|translational initiation|regulation of translation|poly(A) binding|poly(U) RNA binding|mRNA metabolic process|ribonucleoprotein complex
Cse_sc000902.1_g080.1	474.654	186.678	0.393293	4.15571e-05	Down	CHUP1	Protein CHUP1, chloroplastic	GO:0009507,GO:0009707,GO:0009902	chloroplast|chloroplast outer membrane|chloroplast relocation
Cse_sc000906.1_g030.1	848.814	2715.18	3.19879	0.000303837	Up	NAC021	NAC domain-containing protein 21/22	GO:0003677,GO:0003700,GO:0005634,GO:0009734,GO:0010072,GO:0048527	DNA binding|DNA-binding transcription factor activity|nucleus|auxin-activated signaling pathway|primary shoot apical meristem specification|lateral root development
Cse_sc000906.1_g040.1	9.46283	1.64592	0.173935	0.0180325	Down
Cse_sc000906.1_g080.1	57.3548	18.9964	0.331209	0.000406533	Down	LSH4	Protein LIGHT-DEPENDENT SHORT HYPOCOTYLS 4	GO:0003677,GO:0005634,GO:0007275,GO:0009299,GO:0009416,GO:0090698	DNA binding|nucleus|multicellular organism development|mRNA transcription|response to light stimulus|post-embryonic plant morphogenesis
Cse_sc000907.1_g080.1	15.0147	1.28789	0.0857755	0.000277385	Down	A6	Probable glucan endo-1,3-beta-glucosidase A6	GO:0005975,GO:0006952,GO:0009793,GO:0010584,GO:0042973,GO:0046658	carbohydrate metabolic process|defense response|embryo development ending in seed dormancy|pollen exine formation|glucan endo-1,3-beta-D-glucosidase activity|anchored component of plasma membrane
Cse_sc000907.1_g110.1	30.9331	254.714	8.23433	1.06804e-15	Up	UGT75L6	Crocetin glucosyltransferase, chloroplastic	GO:0009507,GO:0016758	chloroplast|transferase activity, transferring hexosyl groups
Cse_sc000909.1_g050.1	156.824	316.354	2.01725	0.002199	Up	MED15A	Mediator of RNA polymerase II transcription subunit 15a	GO:0003713,GO:0005634,GO:0009751,GO:0016592,GO:0031490,GO:0045723	transcription coactivator activity|nucleus|response to salicylic acid|mediator complex|chromatin DNA binding|positive regulation of fatty acid biosynthetic process
Cse_sc000913.1_g050.1	615.622	1913.47	3.10819	0.00564161	Up	AMT1-1	Ammonium transporter 1 member 1	GO:0005887,GO:0008519,GO:0015696,GO:0072488	integral component of plasma membrane|ammonium transmembrane transporter activity|ammonium transport|ammonium transmembrane transport
Cse_sc000918.1_g030.1	16.3911	5.84409	0.35654	0.0385749	Down	ZIP3	Zinc transporter 3	GO:0005385,GO:0005886,GO:0006829,GO:0016021,GO:0071577	zinc ion transmembrane transporter activity|plasma membrane|zinc ion transport|integral component of membrane|zinc ion transmembrane transport
Cse_sc000919.1_g030.1	28.4879	8.4576	0.296883	0.00607774	Down	RBOHD	Respiratory burst oxidase homolog protein D	GO:0004601,GO:0005509,GO:0005794,GO:0005886,GO:0007231,GO:0009408,GO:0009611,GO:0016021,GO:0016174,GO:0033500,GO:0043069,GO:0050832,GO:0072593	peroxidase activity|calcium ion binding|Golgi apparatus|plasma membrane|osmosensory signaling pathway|response to heat|response to wounding|integral component of membrane|NAD(P)H oxidase activity|carbohydrate homeostasis|negative regulation of programmed cell death|defense response to fungus|reactive oxygen species metabolic process
Cse_sc000920.1_g080.1	3.77667	0	0	0.0325165	Down
Cse_sc000920.1_g100.1	99.722	0.643946	0.00645741	3.29985e-05	Down	ALAAT2	Alanine aminotransferase 2, mitochondrial	GO:0001666,GO:0004021,GO:0005739,GO:0009058,GO:0030170,GO:0042853	response to hypoxia|L-alanine:2-oxoglutarate aminotransferase activity|mitochondrion|biosynthetic process|pyridoxal phosphate binding|L-alanine catabolic process
Cse_sc000921.1_g110.1	16.9489	3.98252	0.234972	0.00607684	Down	N	TMV resistance protein N	GO:0005524,GO:0005737,GO:0007165,GO:0009626,GO:0043531	ATP binding|cytoplasm|signal transduction|plant-type hypersensitive response|ADP binding
Cse_sc000922.1_g050.1	22.829	1.79514	0.0786344	3.45247e-06	Down	EIX1	Receptor-like protein EIX1	GO:0005886,GO:0016021,GO:0050832	plasma membrane|integral component of membrane|defense response to fungus
Cse_sc000926.1_g040.1	125.625	4290.58	34.1537	5.09939e-11	Up	CSLG2	Cellulose synthase-like protein G2	GO:0000139,GO:0005794,GO:0005802,GO:0005886,GO:0009833,GO:0016021,GO:0016759,GO:0016760,GO:0030244,GO:0071555	Golgi membrane|Golgi apparatus|trans-Golgi network|plasma membrane|plant-type primary cell wall biogenesis|integral component of membrane|cellulose synthase activity|cellulose synthase (UDP-forming) activity|cellulose biosynthetic process|cell wall organization
Cse_sc000926.1_g080.1	23.1327	1.95888	0.08468	8.00491e-06	Down	ZFP11	Zinc finger protein 11	GO:0003676,GO:0003700,GO:0005634,GO:0006355,GO:0007275,GO:0040008,GO:0046872	nucleic acid binding|DNA-binding transcription factor activity|nucleus|regulation of transcription, DNA-templated|multicellular organism development|regulation of growth|metal ion binding
Cse_sc000927.1_g010.1	61.4455	481.309	7.83311	2.24655e-17	Up	GLR2.7	Glutamate receptor 2.7	GO:0004970,GO:0005262,GO:0005773,GO:0005886,GO:0006816,GO:0008066,GO:0016021,GO:0019722,GO:0071230	ionotropic glutamate receptor activity|calcium channel activity|vacuole|plasma membrane|calcium ion transport|glutamate receptor activity|integral component of membrane|calcium-mediated signaling|cellular response to amino acid stimulus
Cse_sc000928.1_g050.1	19.4579	1.79514	0.0922576	3.41635e-05	Down	SSL13	Protein STRICTOSIDINE SYNTHASE-LIKE 13	GO:0005773,GO:0005783,GO:0009058,GO:0009555,GO:0010584,GO:0016020	vacuole|endoplasmic reticulum|biosynthetic process|pollen development|pollen exine formation|membrane
Cse_sc000928.1_g070.1	8.23701	1.39939	0.169891	0.0384108	Down	POSF21	Probable transcription factor PosF21	GO:0003677,GO:0003700,GO:0005634,GO:0005737,GO:0005829	DNA binding|DNA-binding transcription factor activity|nucleus|cytoplasm|cytosol
Cse_sc000929.1_g130.1	133.193	6.48254	0.0486703	8.36249e-14	Down	LIP2	Triacylglycerol lipase 2	GO:0002213,GO:0004806,GO:0005576,GO:0016042,GO:0016298,GO:0044255	defense response to insect|triglyceride lipase activity|extracellular region|lipid catabolic process|lipase activity|cellular lipid metabolic process
Cse_sc000929.1_g140.1	9.26769	1.28789	0.138966	0.0108605	Down
Cse_sc000930.1_g100.1	45.5887	187.541	4.11377	5.16461e-08	Up	RABA5D	Ras-related protein RABA5d	GO:0003924,GO:0005525,GO:0005829,GO:0005886,GO:0006886,GO:0032482	GTPase activity|GTP binding|cytosol|plasma membrane|intracellular protein transport|Rab protein signal transduction
Cse_sc000931.1_g040.1	28.0679	656.117	23.376	1.4764e-18	Up
Cse_sc000932.1_g070.1	1.97774	11.6955	5.91358	0.00582623	Up	At3g47200	UPF0481 protein At3g47200	GO:0005886,GO:0016021	plasma membrane|integral component of membrane
Cse_sc000935.1_g100.1	40.3947	6.56182	0.162442	3.42934e-06	Down	A1	Elongation factor 1-alpha 1	GO:0003746,GO:0003924,GO:0005525,GO:0005739,GO:0005886,GO:0006412,GO:0006414,GO:0009506	translation elongation factor activity|GTPase activity|GTP binding|mitochondrion|plasma membrane|translation|translational elongation|plasmodesma
Cse_sc000935.1_g130.1	92.7058	2.28085	0.0246031	5.34457e-07	Down
Cse_sc000936.1_g040.1	7.51971	0	0	0.00086995	Down	PVA22	Vesicle-associated protein 2-2	GO:0005789,GO:0005886,GO:0016021,GO:0016032,GO:0046907	endoplasmic reticulum membrane|plasma membrane|integral component of membrane|viral process|intracellular transport
Cse_sc000936.1_g050.1	72.7707	0.652959	0.00897284	2.91893e-11	Down	RBK2	Receptor-like cytosolic serine/threonine-protein kinase RBK2
Cse_sc000936.1_g060.1	1131.6	391.715	0.34616	1.26784e-06	Down	ERD3	Probable methyltransferase PMT21	GO:0005768,GO:0005789,GO:0005794,GO:0005802,GO:0008757,GO:0016021,GO:0052546	endosome|endoplasmic reticulum membrane|Golgi apparatus|trans-Golgi network|S-adenosylmethionine-dependent methyltransferase activity|integral component of membrane|cell wall pectin metabolic process
Cse_sc000936.1_g070.1	101.024	213.4	2.11237	0.00161594	Up	SMH6	Single myb histone 6	GO:0000781,GO:0000785,GO:0000786,GO:0003691,GO:0005634,GO:0005730,GO:0006334,GO:0042803,GO:0043047	chromosome, telomeric region|chromatin|nucleosome|double-stranded telomeric DNA binding|nucleus|nucleolus|nucleosome assembly|protein homodimerization activity|single-stranded telomeric DNA binding
Cse_sc000936.1_g080.1	40.8756	8.02597	0.196351	6.84488e-05	Down	RPA1E	Replication protein A 70 kDa DNA-binding subunit E	GO:0000723,GO:0000724,GO:0000784,GO:0003684,GO:0003697,GO:0005662,GO:0006261,GO:0006268,GO:0006281,GO:0006289,GO:0007004,GO:0008270,GO:0043047,GO:0043565,GO:0051321	telomere maintenance|double-strand break repair via homologous recombination|nuclear chromosome, telomeric region|damaged DNA binding|single-stranded DNA binding|DNA replication factor A complex|DNA-dependent DNA replication|DNA unwinding involved in DNA replication|DNA repair|nucleotide-excision repair|telomere maintenance via telomerase|zinc ion binding|single-stranded telomeric DNA binding|seq…
Cse_sc000939.1_g040.1	10.3416	2.02364	0.195679	0.0166893	Down	TRN1	Protein TORNADO 1	GO:0005525,GO:0009734,GO:0009825,GO:0009926,GO:0009933,GO:0009956,GO:0009965,GO:0010305,GO:0010540,GO:0016021,GO:0016787	GTP binding|auxin-activated signaling pathway|multidimensional cell growth|auxin polar transport|meristem structural organization|radial pattern formation|leaf morphogenesis|leaf vascular tissue pattern formation|basipetal auxin transport|integral component of membrane|hydrolase activity
Cse_sc000941.1_g080.1	250.055	72.168	0.288609	9.37944e-05	Down	TOR1L3	TORTIFOLIA1-like protein 3	GO:0005874,GO:0008017	microtubule|microtubule binding
Cse_sc000944.1_g030.1	52.2784	14.0986	0.269683	7.24757e-05	Down	ABCB11	ABC transporter B family member 11	GO:0005524,GO:0005886,GO:0009506,GO:0010329,GO:0010540,GO:0016021,GO:0042626	ATP binding|plasma membrane|plasmodesma|auxin efflux transmembrane transporter activity|basipetal auxin transport|integral component of membrane|ATPase activity, coupled to transmembrane movement of substances
Cse_sc000944.1_g040.1	7550.63	2769.71	0.366819	2.63383e-06	Down	fluG	Protein fluG	GO:0000905,GO:0001896,GO:0005737,GO:0006598,GO:0008134,GO:0010913,GO:0010914,GO:0016787,GO:0030435,GO:0045461,GO:0048315,GO:0075307,GO:1900376	sporocarp development involved in asexual reproduction|autolysis|cytoplasm|polyamine catabolic process|transcription factor binding|regulation of sterigmatocystin biosynthetic process|positive regulation of sterigmatocystin biosynthetic process|hydrolase activity|sporulation resulting in formation of a cellular spore|sterigmatocystin biosynthetic process|conidium formation|positive regulation of …
Cse_sc000945.1_g100.1	13.0456	3.07235	0.235509	0.0144527	Down
Cse_sc000946.1_g030.1	180.444	62.3494	0.345532	1.3933e-05	Down	GLCAT14A	Beta-glucuronosyltransferase GlcAT14A	GO:0000139,GO:0005794,GO:0008375,GO:0009826,GO:0015020,GO:0016021	Golgi membrane|Golgi apparatus|acetylglucosaminyltransferase activity|unidimensional cell growth|glucuronosyltransferase activity|integral component of membrane
Cse_sc000948.1_g090.1	14.2531	50.5522	3.54675	0.0139635	Up	RLP6	Receptor-like protein 6	GO:0005886,GO:0016020,GO:0016021	plasma membrane|membrane|integral component of membrane
Cse_sc000950.1_g030.1	6.26938	31.9944	5.10328	5.35707e-05	Up	At1g34300	G-type lectin S-receptor-like serine/threonine-protein kinase At1g34300
Cse_sc000950.1_g040.1	23.2442	110.879	4.77015	3.49455e-08	Up	At1g34300	G-type lectin S-receptor-like serine/threonine-protein kinase At1g34300
Cse_sc000957.1_g040.1	3.75169	0	0	0.0346792	Down	FRS5	Protein FAR1-RELATED SEQUENCE 5	GO:0005634,GO:0006355,GO:0008270	nucleus|regulation of transcription, DNA-templated|zinc ion binding
Cse_sc000959.1_g020.1	75.1434	23.0132	0.306257	0.000200315	Down	At5g34940	Heparanase-like protein 3	GO:0004566,GO:0005576,GO:0005765,GO:0009505	beta-glucuronidase activity|extracellular region|lysosomal membrane|plant-type cell wall
Cse_sc000959.1_g030.1	30.1315	161.374	5.35565	8.04081e-05	Up	At1g30570	Probable receptor-like protein kinase At1g30570
Cse_sc000960.1_g030.1	232.893	1572.4	6.75161	1.45473e-16	Up	DGD2	Digalactosyldiacylglycerol synthase 2, chloroplastic	GO:0009707,GO:0009877,GO:0043661,GO:0046481	chloroplast outer membrane|nodulation|peribacteroid membrane|digalactosyldiacylglycerol synthase activity
Cse_sc000961.1_g030.1	372.395	32.2441	0.0865858	1.77582e-13	Down	AGO4A	Protein argonaute 4A	GO:0003676,GO:0031047	nucleic acid binding|gene silencing by RNA
Cse_sc000963.1_g060.1	135.245	463.912	3.43016	1.04035e-07	Up	BEL1	Homeobox protein BEL1 homolog	GO:0003677,GO:0003700,GO:0005634,GO:0005829,GO:0009506	DNA binding|DNA-binding transcription factor activity|nucleus|cytosol|plasmodesma
Cse_sc000966.1_g030.1	1194.1	2398.93	2.00899	0.00105766	Up	HIR1	Hypersensitive-induced response protein 1	GO:0005886	plasma membrane
Cse_sc000968.1_g020.1	382.995	87.8646	0.229414	0.000373042	Down
Cse_sc000969.1_g030.1	38.6641	105.511	2.72892	0.000211981	Up
Cse_sc000969.1_g060.1	148.13	359.184	2.42478	0.000113842	Up
Cse_sc000971.1_g060.1	8.83853	1.69265	0.191509	0.047765	Down	KIN4C	Kinesin-like protein KIN-4C	GO:0003777,GO:0005524,GO:0005871,GO:0005874,GO:0007018,GO:0007052,GO:0008017,GO:0009506,GO:0016887,GO:0071555	microtubule motor activity|ATP binding|kinesin complex|microtubule|microtubule-based movement|mitotic spindle organization|microtubule binding|plasmodesma|ATPase activity|cell wall organization
Cse_sc000972.1_g070.1	4.02154	13.1308	3.26511	0.0337073	Up
Cse_sc000978.1_g050.1	419.991	848.604	2.02053	0.00143129	Up	RPT6A	26S proteasome regulatory subunit 8 homolog A	GO:0000502,GO:0005524,GO:0005634,GO:0005829,GO:0005886,GO:0008540,GO:0016787,GO:0017025,GO:0030163,GO:0031595,GO:0031597,GO:0045899	proteasome complex|ATP binding|nucleus|cytosol|plasma membrane|proteasome regulatory particle, base subcomplex|hydrolase activity|TBP-class protein binding|protein catabolic process|nuclear proteasome complex|cytosolic proteasome complex|positive regulation of RNA polymerase II transcriptional preinitiation complex assembly
Cse_sc000979.1_g090.1	70.4264	22.2325	0.315685	0.00856538	Down	abh1	Alpha-ketoglutarate-dependent dioxygenase abh1	GO:0005634,GO:0005719,GO:0005737,GO:0005739,GO:0005829,GO:0006281,GO:0008198,GO:0051213,GO:1990983,GO:1990984	nucleus|nuclear euchromatin|cytoplasm|mitochondrion|cytosol|DNA repair|ferrous iron binding|dioxygenase activity|tRNA demethylation|tRNA demethylase activity
Cse_sc000980.1_g090.1	346.291	1626.78	4.69772	0.000711885	Up	SOBIR1	Leucine-rich repeat receptor-like serine/threonine/tyrosine-protein kinase SOBIR1
Cse_sc000983.1_g030.1	482.732	202.886	0.420286	0.000177488	Down	FLA17	Fasciclin-like arabinogalactan protein 17	GO:0005576,GO:0005773	extracellular region|vacuole
Cse_sc000986.1_g060.1	1163.49	373.327	0.320868	0.0173457	Down	CNGC4	Cyclic nucleotide-gated ion channel 4	GO:0005216,GO:0005516,GO:0005886,GO:0008324,GO:0009626,GO:0016020,GO:0016021,GO:0030552,GO:0030553	ion channel activity|calmodulin binding|plasma membrane|cation transmembrane transporter activity|plant-type hypersensitive response|membrane|integral component of membrane|cAMP binding|cGMP binding
Cse_sc000988.1_g060.1	44.4742	10.3068	0.231748	0.0155357	Down	HIPP30	Heavy metal-associated isoprenylated plant protein 30	GO:0030001,GO:0046872	metal ion transport|metal ion binding
Cse_sc000989.1_g030.1	8.44946	0	0	0.00120914	Down
Cse_sc000989.1_g040.1	4118.04	2015.66	0.489472	0.00096507	Down	CSI1	Protein CELLULOSE SYNTHASE INTERACTIVE 1	GO:0005737,GO:0005794,GO:0005886,GO:0008017,GO:0008360,GO:0009414,GO:0009506,GO:0009833,GO:0009898,GO:0009901,GO:0010208,GO:0010215,GO:0010330,GO:0030244,GO:0036449,GO:0040008,GO:0043622,GO:0048467,GO:0048868,GO:0051211,GO:0051592,GO:0055028,GO:0070507,GO:0072699,GO:2000067	cytoplasm|Golgi apparatus|plasma membrane|microtubule binding|regulation of cell shape|response to water deprivation|plasmodesma|plant-type primary cell wall biogenesis|cytoplasmic side of plasma membrane|anther dehiscence|pollen wall assembly|cellulose microfibril organization|cellulose synthase complex|cellulose biosynthetic process|microtubule minus-end|regulation of growth|cortical microtubul…
Cse_sc000992.1_g060.1	77.7786	160.441	2.06279	0.00445447	Up		Secoisolariciresinol dehydrogenase (Fragment)	GO:0009807,GO:0102911	lignan biosynthetic process|(-)-secoisolariciresinol dehydrogenase activity
Cse_sc000995.1_g030.1	20.288	90.5385	4.46266	3.67445e-07	Up	CCR3	Putative serine/threonine-protein kinase-like protein CCR3
Cse_sc000997.1_g080.1	16.1609	0	0	0.000196751	Down	PUB23	E3 ubiquitin-protein ligase PUB23	GO:0004842,GO:0005829,GO:0006952,GO:0009414,GO:0010200,GO:0016567,GO:0051865	ubiquitin-protein transferase activity|cytosol|defense response|response to water deprivation|response to chitin|protein ubiquitination|protein autoubiquitination
Cse_sc000999.1_g060.1	1574.25	76.492	0.0485895	6.20933e-14	Down	RIC1	CRIB domain-containing protein RIC1	GO:0000902,GO:0007275,GO:0009860,GO:0010005,GO:0010215,GO:0016324,GO:0031122,GO:0040008	cell morphogenesis|multicellular organism development|pollen tube growth|cortical microtubule, transverse to long axis|cellulose microfibril organization|apical plasma membrane|cytoplasmic microtubule organization|regulation of growth
Cse_sc001000.1_g030.1	42.3347	154.5	3.64949	8.71281e-07	Up	CSLG3	Cellulose synthase-like protein G3	GO:0000139,GO:0005794,GO:0005802,GO:0005886,GO:0009833,GO:0016021,GO:0016759,GO:0016760,GO:0030244,GO:0071555	Golgi membrane|Golgi apparatus|trans-Golgi network|plasma membrane|plant-type primary cell wall biogenesis|integral component of membrane|cellulose synthase activity|cellulose synthase (UDP-forming) activity|cellulose biosynthetic process|cell wall organization
Cse_sc001000.1_g060.1	26.9603	120.031	4.45213	0.000180449	Up	CSLG3	Cellulose synthase-like protein G3	GO:0000139,GO:0005794,GO:0005802,GO:0005886,GO:0009833,GO:0016021,GO:0016759,GO:0016760,GO:0030244,GO:0071555	Golgi membrane|Golgi apparatus|trans-Golgi network|plasma membrane|plant-type primary cell wall biogenesis|integral component of membrane|cellulose synthase activity|cellulose synthase (UDP-forming) activity|cellulose biosynthetic process|cell wall organization
Cse_sc001001.1_g020.1	21.7812	0.643946	0.0295642	2.50511e-07	Down
Cse_sc001002.1_g020.1	54.0973	8.0637	0.149059	0.00299959	Down	At5g02620	Ankyrin repeat-containing protein At5g02620	GO:0005783,GO:0005886,GO:0016021	endoplasmic reticulum|plasma membrane|integral component of membrane
Cse_sc001004.1_g060.1	69.3993	162.338	2.33919	0.0298617	Up	MPK15	Mitogen-activated protein kinase 15	GO:0004707,GO:0005524,GO:0005634,GO:0005737,GO:0010468,GO:0035556	MAP kinase activity|ATP binding|nucleus|cytoplasm|regulation of gene expression|intracellular signal transduction
Cse_sc001011.1_g060.1	47.0282	5.47538	0.116428	4.97753e-08	Down	MAPKKK18	Mitogen-activated protein kinase kinase kinase 18	GO:0004672,GO:0004674,GO:0004709,GO:0005524,GO:0005634,GO:0005737,GO:0006970,GO:0009737,GO:0009738,GO:0009789,GO:0023014,GO:0031098,GO:0032147,GO:0046777,GO:1900057,GO:1902457,GO:2000038	protein kinase activity|protein serine/threonine kinase activity|MAP kinase kinase kinase activity|ATP binding|nucleus|cytoplasm|response to osmotic stress|response to abscisic acid|abscisic acid-activated signaling pathway|positive regulation of abscisic acid-activated signaling pathway|signal transduction by protein phosphorylation|stress-activated protein kinase signaling cascade|activation of…
Cse_sc001014.1_g020.1	523.753	195.521	0.373307	1.31558e-05	Down
Cse_sc001023.1_g030.1	36.973	4.69641	0.127023	1.08694e-06	Down	C1	Anthocyanin regulatory C1 protein	GO:0005634,GO:0030154,GO:0043565,GO:0044212	nucleus|cell differentiation|sequence-specific DNA binding|transcription regulatory region DNA binding
Cse_sc001023.1_g100.1	3149.52	1415.88	0.449554	0.000180333	Down	ADK2	Adenosine kinase 2	GO:0004001,GO:0005507,GO:0005524,GO:0005634,GO:0005737,GO:0005829,GO:0005886,GO:0006169,GO:0016032,GO:0019900,GO:0044209	adenosine kinase activity|copper ion binding|ATP binding|nucleus|cytoplasm|cytosol|plasma membrane|adenosine salvage|viral process|kinase binding|AMP salvage
Cse_sc001024.1_g020.1	11.9392	3.28449	0.275101	0.0385289	Down	At3g51220	WEB family protein At3g51220	GO:0005829,GO:0009903,GO:0009904	cytosol|chloroplast avoidance movement|chloroplast accumulation movement
Cse_sc001034.1_g030.1	82.3695	36.486	0.442955	0.00334093	Down
Cse_sc001036.1_g020.1	20.8359	1.35266	0.0649195	0.00469833	Down
Cse_sc001036.1_g040.1	3.40492	0	0	0.0454979	Down	At4g18260	Cytochrome b561 domain-containing protein At4g18260	GO:0016021,GO:0046872,GO:0055114	integral component of membrane|metal ion binding|oxidation-reduction process
Cse_sc001041.1_g130.1	11.2217	1.36167	0.121343	0.00414433	Down	SKOR	Potassium channel SKOR	GO:0006813,GO:0015271,GO:0016021,GO:0034765,GO:0055075	potassium ion transport|outward rectifier potassium channel activity|integral component of membrane|regulation of ion transmembrane transport|potassium ion homeostasis
Cse_sc001046.1_g030.1	31.2851	67.316	2.15169	0.011299	Up		Cytochrome P450 CYP72A219	GO:0004497,GO:0005506,GO:0016021,GO:0016705,GO:0020037	monooxygenase activity|iron ion binding|integral component of membrane|oxidoreductase activity, acting on paired donors, with incorporation or reduction of molecular oxygen|heme binding
Cse_sc001046.1_g040.1	22.7357	0.377723	0.0166136	4.63514e-08	Down	CYP72A13	Cytochrome P450 72A13	GO:0004497,GO:0005506,GO:0016021,GO:0016705,GO:0020037	monooxygenase activity|iron ion binding|integral component of membrane|oxidoreductase activity, acting on paired donors, with incorporation or reduction of molecular oxygen|heme binding
Cse_sc001048.1_g040.1	2056.34	4376.47	2.12828	0.000403689	Up	KCS11	3-ketoacyl-CoA synthase 11	GO:0006633,GO:0009409,GO:0009416,GO:0016021,GO:0102336,GO:0102337,GO:0102338,GO:0102756	fatty acid biosynthetic process|response to cold|response to light stimulus|integral component of membrane|3-oxo-arachidoyl-CoA synthase activity|3-oxo-cerotoyl-CoA synthase activity|3-oxo-lignoceronyl-CoA synthase activity|very-long-chain 3-ketoacyl-CoA synthase activity
Cse_sc001050.1_g030.1	594.897	101.448	0.170531	1.19114e-13	Down	RSS3	Protein RICE SALT SENSITIVE 3	GO:0005634,GO:0005737	nucleus|cytoplasm
Cse_sc001052.1_g070.1	79.7786	31.6058	0.396169	0.000808153	Down	CSE	Caffeoylshikimate esterase	GO:0003846,GO:0004622,GO:0005783,GO:0005794,GO:0005886,GO:0006979,GO:0009506,GO:0009809,GO:0010043,GO:0016020,GO:0016787,GO:0042542,GO:0046686,GO:0090430	2-acylglycerol O-acyltransferase activity|lysophospholipase activity|endoplasmic reticulum|Golgi apparatus|plasma membrane|response to oxidative stress|plasmodesma|lignin biosynthetic process|response to zinc ion|membrane|hydrolase activity|response to hydrogen peroxide|response to cadmium ion|caffeoyl-CoA: alcohol caffeoyl transferase activity
Cse_sc001058.1_g010.1	5.2125	0	0	0.00739446	Down
Cse_sc001060.1_g030.1	109.488	261.474	2.38815	0.000250529	Up	ESP1	Separase	GO:0000911,GO:0004197,GO:0005634,GO:0005737,GO:0005813,GO:0005874,GO:0006887,GO:0008233,GO:0009793,GO:0009826,GO:0009960,GO:0016192,GO:0045876,GO:0051304,GO:0051307,GO:0072686,GO:2000114	cytokinesis by cell plate formation|cysteine-type endopeptidase activity|nucleus|cytoplasm|centrosome|microtubule|exocytosis|peptidase activity|embryo development ending in seed dormancy|unidimensional cell growth|endosperm development|vesicle-mediated transport|positive regulation of sister chromatid cohesion|chromosome separation|meiotic chromosome separation|mitotic spindle|regulation of estab…
Cse_sc001061.1_g050.1	67.1782	30.4619	0.45345	0.00834035	Down
Cse_sc001062.1_g030.1	120.846	30.0265	0.248468	0.00902363	Down	HERK1	Receptor-like protein kinase HERK 1
Cse_sc001062.1_g040.1	144.636	21.4916	0.14859	2.20461e-11	Down	N	TMV resistance protein N	GO:0005524,GO:0005737,GO:0007165,GO:0009626,GO:0043531	ATP binding|cytoplasm|signal transduction|plant-type hypersensitive response|ADP binding
Cse_sc001071.1_g030.1	432.529	3936.56	9.10126	1.28693e-21	Up	NYC1	Probable chlorophyll(ide) b reductase NYC1, chloroplastic	GO:0009535,GO:0009536,GO:0010304,GO:0015996,GO:0016021,GO:0016491,GO:0034256	chloroplast thylakoid membrane|plastid|PSII associated light-harvesting complex II catabolic process|chlorophyll catabolic process|integral component of membrane|oxidoreductase activity|chlorophyll(ide) b reductase activity
Cse_sc001074.1_g030.1	416.243	1407.72	3.38196	5.03013e-08	Up	SYT4	Synaptotagmin-4	GO:0005783,GO:0006869,GO:0008289,GO:0016021,GO:0046872	endoplasmic reticulum|lipid transport|lipid binding|integral component of membrane|metal ion binding
Cse_sc001075.1_g080.1	32.3756	8.65924	0.267461	0.000749099	Down	GT-4	Trihelix transcription factor GT-4	GO:0003700,GO:0005634,GO:0006355,GO:0043565	DNA-binding transcription factor activity|nucleus|regulation of transcription, DNA-templated|sequence-specific DNA binding
Cse_sc001076.1_g110.1	5.37401	23.9504	4.45671	0.000837067	Up	VIT_05s0051g00580	Inosine triphosphate pyrophosphatase	GO:0000166,GO:0005737,GO:0009117,GO:0009143,GO:0009204,GO:0035529,GO:0046872,GO:0047429	nucleotide binding|cytoplasm|nucleotide metabolic process|nucleoside triphosphate catabolic process|deoxyribonucleoside triphosphate catabolic process|NADH pyrophosphatase activity|metal ion binding|nucleoside-triphosphate diphosphatase activity
Cse_sc001077.1_g050.1	70.0075	3985.75	56.9332	8.80253e-46	Up	YSL7	Probable metal-nicotianamine transporter YSL7	GO:0005886,GO:0016021,GO:0055085	plasma membrane|integral component of membrane|transmembrane transport
Cse_sc001081.1_g050.1	12.961	3.4878	0.2691	0.020916	Down	At1g54610	Probable serine/threonine-protein kinase At1g54610	GO:0004693,GO:0005524,GO:0005634,GO:0005886,GO:0006468	cyclin-dependent protein serine/threonine kinase activity|ATP binding|nucleus|plasma membrane|protein phosphorylation
Cse_sc001082.1_g020.1	5.6775	17.1185	3.01515	0.0240867	Up	At1g13570	F-box/FBD/LRR-repeat protein At1g13570
Cse_sc001082.1_g040.1	15.6031	50.8437	3.25856	0.000374833	Up
Cse_sc001082.1_g060.1	12.3271	1.51089	0.122567	0.00149278	Down	RPL34	60S ribosomal protein L34	GO:0003735,GO:0005840,GO:0006412	structural constituent of ribosome|ribosome|translation
Cse_sc001083.1_g050.1	672.086	279.289	0.415555	0.00135018	Down	SBE1	1,4-alpha-glucan-branching enzyme	GO:0003844,GO:0004553,GO:0005978,GO:0009501,GO:0009507,GO:0019252,GO:0043169,GO:0102752	1,4-alpha-glucan branching enzyme activity|hydrolase activity, hydrolyzing O-glycosyl compounds|glycogen biosynthetic process|amyloplast|chloroplast|starch biosynthetic process|cation binding|1,4-alpha-glucan branching enzyme activity (using a glucosylated glycogenin as primer for glycogen synthesis)
Cse_sc001086.1_g110.1	65.3358	30.5753	0.467972	0.00975277	Down
Cse_sc001088.1_g010.1	24.7649	67.2105	2.71394	0.000761447	Up	NLP2	Protein NLP2	GO:0003677,GO:0003700,GO:0005634,GO:0006355	DNA binding|DNA-binding transcription factor activity|nucleus|regulation of transcription, DNA-templated
Cse_sc001090.1_g020.1	146.543	4.59041	0.0313247	4.72802e-13	Down		Alpha-soluble NSF attachment protein	GO:0005622,GO:0006886,GO:0016020,GO:0016192	intracellular|intracellular protein transport|membrane|vesicle-mediated transport
Cse_sc001090.1_g030.1	478.169	24.9108	0.0520962	6.09935e-13	Down	RHD3	Protein ROOT HAIR DEFECTIVE 3	GO:0000139,GO:0003924,GO:0005525,GO:0005737,GO:0005774,GO:0005783,GO:0005789,GO:0005886,GO:0006888,GO:0007029,GO:0009832,GO:0009932,GO:0010053,GO:0016021,GO:0016320,GO:0030036,GO:0048309	Golgi membrane|GTPase activity|GTP binding|cytoplasm|vacuolar membrane|endoplasmic reticulum|endoplasmic reticulum membrane|plasma membrane|ER to Golgi vesicle-mediated transport|endoplasmic reticulum organization|plant-type cell wall biogenesis|cell tip growth|root epidermal cell differentiation|integral component of membrane|endoplasmic reticulum membrane fusion|actin cytoskeleton organization|…
Cse_sc001092.1_g010.1	43.0227	3.34024	0.077639	4.65551e-09	Down
Cse_sc001092.1_g150.1	528.012	36.0756	0.0683233	4.86548e-08	Down
Cse_sc001094.1_g010.1	9846.03	4089.92	0.415387	3.34035e-05	Down	LHCB4.1	Chlorophyll a-b binding protein CP29.1, chloroplastic	GO:0009416,GO:0009507,GO:0009522,GO:0009523,GO:0009534,GO:0009535,GO:0009579,GO:0009637,GO:0009768,GO:0009941,GO:0010114,GO:0010218,GO:0010287,GO:0016020,GO:0016021,GO:0016168,GO:0018298,GO:0019904,GO:0046872	response to light stimulus|chloroplast|photosystem I|photosystem II|chloroplast thylakoid|chloroplast thylakoid membrane|thylakoid|response to blue light|photosynthesis, light harvesting in photosystem I|chloroplast envelope|response to red light|response to far red light|plastoglobule|membrane|integral component of membrane|chlorophyll binding|protein-chromophore linkage|protein domain specific …
Cse_sc001094.1_g030.1	6.86079	20.8799	3.04336	0.0143616	Up	DAT	Deacetylvindoline O-acetyltransferase	GO:0005634,GO:0005737,GO:0009820,GO:0047162	nucleus|cytoplasm|alkaloid metabolic process|17-O-deacetylvindoline O-acetyltransferase activity
Cse_sc001094.1_g100.1	1273.64	189.326	0.148649	1.59833e-16	Down	UGT85A24	7-deoxyloganetin glucosyltransferase	GO:0035251	UDP-glucosyltransferase activity
Cse_sc001094.1_g110.1	48.1826	231.462	4.80384	0.00852363	Up	PDC4	Pyruvate decarboxylase 4	GO:0000287,GO:0004737,GO:0005622,GO:0005829,GO:0016831,GO:0030976	magnesium ion binding|pyruvate decarboxylase activity|intracellular|cytosol|carboxy-lyase activity|thiamine pyrophosphate binding
Cse_sc001095.1_g130.1	94.5751	27.895	0.294951	1.24388e-05	Down	FPP7	Filament-like plant protein 7
Cse_sc001100.1_g040.1	29.3769	76.9864	2.62065	0.00089057	Up
Cse_sc001101.1_g050.1	21.0363	0.377723	0.0179558	0.00172507	Down	At3g18150	Putative F-box/LRR-repeat protein At3g18150
Cse_sc001102.1_g070.1	34.5295	6.72722	0.194825	0.000159482	Down	At3g14260	Protein LURP-one-related 11
Cse_sc001102.1_g080.1	19.5932	6.42328	0.327831	0.0168932	Down
Cse_sc001102.1_g090.1	161.383	1.78613	0.0110677	3.63527e-30	Down	NFYC3	Nuclear transcription factor Y subunit C-3	GO:0003677,GO:0003700,GO:0003712,GO:0005634,GO:0009738,GO:0009740,GO:0010029,GO:0046982,GO:0048574,GO:2000306	DNA binding|DNA-binding transcription factor activity|transcription coregulator activity|nucleus|abscisic acid-activated signaling pathway|gibberellic acid mediated signaling pathway|regulation of seed germination|protein heterodimerization activity|long-day photoperiodism, flowering|positive regulation of photomorphogenesis
Cse_sc001103.1_g020.1	26.0481	320.262	12.295	0.000354264	Up	SULTR1	Sulfate transporter 1.3	GO:0005886,GO:0008271,GO:0015116,GO:0015293,GO:0015301,GO:0016021	plasma membrane|secondary active sulfate transmembrane transporter activity|sulfate transmembrane transporter activity|symporter activity|anion:anion antiporter activity|integral component of membrane
Cse_sc001105.1_g050.1	5.59291	0	0	0.00530893	Down	GRF12	14-3-3-like protein GF14 iota	GO:0005634,GO:0005737,GO:0019904	nucleus|cytoplasm|protein domain specific binding
Cse_sc001112.1_g050.1	268.151	111.712	0.4166	0.000215848	Down	SPAC24B11.05	Uncharacterized protein C24B11.05	GO:0005634,GO:0005829,GO:0006206,GO:0008252,GO:0008253,GO:0009166	nucleus|cytosol|pyrimidine nucleobase metabolic process|nucleotidase activity|5'-nucleotidase activity|nucleotide catabolic process
Cse_sc001114.1_g060.1	70.2957	13.2136	0.187971	5.90955e-07	Down
Cse_sc001121.1_g020.1	60.6699	0	0	1.1126e-08	Down	PG1	Polygalacturonase	GO:0004650,GO:0005576,GO:0005618,GO:0005975,GO:0071555	polygalacturonase activity|extracellular region|cell wall|carbohydrate metabolic process|cell wall organization
Cse_sc001121.1_g030.1	208.097	6.36586	0.0305908	3.46945e-06	Down	PG1	Polygalacturonase	GO:0004650,GO:0005576,GO:0005618,GO:0005975,GO:0071555	polygalacturonase activity|extracellular region|cell wall|carbohydrate metabolic process|cell wall organization
Cse_sc001121.1_g060.1	6.04925	22.319	3.68954	0.011383	Up
Cse_sc001121.1_g100.1	252.638	4.11372	0.0162831	9.66217e-25	Down
Cse_sc001124.1_g030.1	307.095	885.344	2.88297	0.00274261	Up	ERF061	Ethylene-responsive transcription factor ERF061	GO:0003677,GO:0003700,GO:0005634,GO:0009873,GO:0010200	DNA binding|DNA-binding transcription factor activity|nucleus|ethylene-activated signaling pathway|response to chitin
Cse_sc001125.1_g040.1	914.473	3054.25	3.33991	3.56414e-07	Up	CRCK3	Calmodulin-binding receptor-like cytoplasmic kinase 3
Cse_sc001128.1_g020.1	18.0471	36.4212	2.01812	0.0383299	Up
Cse_sc001128.1_g030.1	1268.47	3555.87	2.80327	1.67969e-06	Up	PILS2	Protein PIN-LIKES 2	GO:0005789,GO:0009733,GO:0009734,GO:0010252,GO:0010311,GO:0010329,GO:0016021,GO:0040009	endoplasmic reticulum membrane|response to auxin|auxin-activated signaling pathway|auxin homeostasis|lateral root formation|auxin efflux transmembrane transporter activity|integral component of membrane|regulation of growth rate
Cse_sc001131.1_g110.1	42.5315	13.4978	0.317361	0.00102602	Down	GATL1	Probable galacturonosyltransferase-like 1	GO:0005783,GO:0005789,GO:0005794,GO:0010051,GO:0010417,GO:0016021,GO:0032504,GO:0045489,GO:0047262,GO:0048366,GO:0052386	endoplasmic reticulum|endoplasmic reticulum membrane|Golgi apparatus|xylem and phloem pattern formation|glucuronoxylan biosynthetic process|integral component of membrane|multicellular organism reproduction|pectin biosynthetic process|polygalacturonate 4-alpha-galacturonosyltransferase activity|leaf development|cell wall thickening
Cse_sc001134.1_g040.1	0	5.5959	Inf	0.00498683	Up
Cse_sc001135.1_g040.1	4221.86	9685.25	2.29407	0.0261129	Up
Cse_sc001137.1_g080.1	3024.57	18487.3	6.11236	6.52725e-16	Up	CYSEP	Vignain	GO:0008234,GO:0031410	cysteine-type peptidase activity|cytoplasmic vesicle
Cse_sc001138.1_g030.1	8.52442	1.77712	0.208474	0.031397	Down	CCC2	Cation-chloride cotransporter 2	GO:0005623,GO:0006884,GO:0010107,GO:0015379,GO:0016021,GO:0055064,GO:0055075,GO:1902476	cell|cell volume homeostasis|potassium ion import|potassium:chloride symporter activity|integral component of membrane|chloride ion homeostasis|potassium ion homeostasis|chloride transmembrane transport
Cse_sc001139.1_g010.1	53.5814	0.755446	0.0140991	3.57801e-05	Down
Cse_sc001139.1_g040.1	0.574332	12.4887	21.7447	0.000177054	Up	WRKY18	WRKY transcription factor 18	GO:0002237,GO:0003700,GO:0005634,GO:0009751,GO:0010200,GO:0031347,GO:0042742,GO:0042802,GO:0043565,GO:0050832	response to molecule of bacterial origin|DNA-binding transcription factor activity|nucleus|response to salicylic acid|response to chitin|regulation of defense response|defense response to bacterium|identical protein binding|sequence-specific DNA binding|defense response to fungus
Cse_sc001139.1_g050.1	4.76505	0.377723	0.0792695	0.0395378	Down	WRKY40	Probable WRKY transcription factor 40	GO:0002237,GO:0003700,GO:0005634,GO:0009611,GO:0009751,GO:0010200,GO:0031347,GO:0042742,GO:0043565,GO:0044212,GO:0045892,GO:0050832	response to molecule of bacterial origin|DNA-binding transcription factor activity|nucleus|response to wounding|response to salicylic acid|response to chitin|regulation of defense response|defense response to bacterium|sequence-specific DNA binding|transcription regulatory region DNA binding|negative regulation of transcription, DNA-templated|defense response to fungus
Cse_sc001139.1_g100.1	279.789	582.187	2.08081	0.00117926	Up	HERK1	Receptor-like protein kinase HERK 1
Cse_sc001139.1_g130.1	238.277	608.283	2.55284	2.78856e-05	Up	ANX2	Receptor-like protein kinase ANXUR2
Cse_sc001139.1_g200.1	254.456	6.56182	0.0257876	5.22938e-18	Down	At4g17486	DeSI-like protein At4g17486	GO:0008233	peptidase activity
Cse_sc001139.1_g210.1	4.79967	0	0	0.0124522	Down	At1g65750	Putative ribonuclease H protein At1g65750	GO:0003676,GO:0004523,GO:0046872	nucleic acid binding|RNA-DNA hybrid ribonuclease activity|metal ion binding
Cse_sc001145.1_g090.1	384.019	108.146	0.281617	8.16201e-08	Down	CXE17	Probable carboxylesterase 17	GO:0052689	carboxylic ester hydrolase activity
Cse_sc001146.1_g030.1	261.882	51.2176	0.195576	6.86121e-11	Down	SFH13	Phosphatidylinositol/phosphatidylcholine transfer protein SFH13	GO:0000139,GO:0005886,GO:0015031	Golgi membrane|plasma membrane|protein transport
Cse_sc001146.1_g070.1	71.7877	1.9769	0.0275382	3.38926e-10	Down	DGK4	Diacylglycerol kinase 4	GO:0003951,GO:0004143,GO:0005524,GO:0006952,GO:0007205	NAD+ kinase activity|diacylglycerol kinase activity|ATP binding|defense response|protein kinase C-activating G protein-coupled receptor signaling pathway
Cse_sc001147.1_g050.1	325.276	123.774	0.38052	4.57824e-05	Down
Cse_sc001149.1_g060.1	94.0009	373.4	3.97231	0.0216035	Up	RPD1	Protein ROOT PRIMORDIUM DEFECTIVE 1	GO:0008285,GO:0010102	negative regulation of cell proliferation|lateral root morphogenesis
Cse_sc001150.1_g050.1	2.02004	11.5982	5.74159	0.00692649	Up	Tf2-8	Transposon Tf2-8 polyprotein	GO:0003677,GO:0003723,GO:0003887,GO:0003964,GO:0004190,GO:0004519,GO:0005634,GO:0006310,GO:0015074,GO:0046872	DNA binding|RNA binding|DNA-directed DNA polymerase activity|RNA-directed DNA polymerase activity|aspartic-type endopeptidase activity|endonuclease activity|nucleus|DNA recombination|DNA integration|metal ion binding
Cse_sc001150.1_g090.1	13.4498	3.76303	0.279785	0.0221341	Down	At1g65750	Putative ribonuclease H protein At1g65750	GO:0003676,GO:0004523,GO:0046872	nucleic acid binding|RNA-DNA hybrid ribonuclease activity|metal ion binding
Cse_sc001152.1_g020.1	1261.93	270.228	0.21414	2.47128e-09	Down	SFH10	Phosphatidylinositol/phosphatidylcholine transfer protein SFH10	GO:0000139,GO:0005886,GO:0015031	Golgi membrane|plasma membrane|protein transport
Cse_sc001152.1_g070.1	654.755	122.853	0.187632	1.85355e-05	Down	BGAL3	Beta-galactosidase 3	GO:0004565,GO:0005618,GO:0005773,GO:0005975,GO:0009505,GO:0030246,GO:0048046	beta-galactosidase activity|cell wall|vacuole|carbohydrate metabolic process|plant-type cell wall|carbohydrate binding|apoplast
Cse_sc001154.1_g030.1	105.213	4.5759	0.0434916	8.65985e-16	Down	CBSCBSPB4	CBS domain-containing protein CBSCBSPB4	GO:0016021	integral component of membrane
Cse_sc001158.1_g050.1	97.5473	202.943	2.08046	0.00938309	Up	N	TMV resistance protein N	GO:0005524,GO:0005737,GO:0007165,GO:0009626,GO:0043531	ATP binding|cytoplasm|signal transduction|plant-type hypersensitive response|ADP binding
Cse_sc001158.1_g080.1	11.2108	26.5045	2.36419	0.0330943	Up	N	TMV resistance protein N	GO:0005524,GO:0005737,GO:0007165,GO:0009626,GO:0043531	ATP binding|cytoplasm|signal transduction|plant-type hypersensitive response|ADP binding
Cse_sc001161.1_g080.1	5.2125	0	0	0.00739446	Down	AtMg01250	Uncharacterized mitochondrial protein AtMg01250	GO:0005739	mitochondrion
Cse_sc001164.1_g040.1	67.4471	6.72907	0.0997681	8.62969e-11	Down	SRS1	Protein SHI RELATED SEQUENCE 1	GO:0003677,GO:0005634,GO:0009555,GO:0009734,GO:0009851,GO:0045893,GO:0046872,GO:0046982,GO:0048653	DNA binding|nucleus|pollen development|auxin-activated signaling pathway|auxin biosynthetic process|positive regulation of transcription, DNA-templated|metal ion binding|protein heterodimerization activity|anther development
Cse_sc001165.1_g180.1	61.566	26.6323	0.432582	0.00474358	Down
Cse_sc001167.1_g070.1	40.7898	9.51532	0.233277	0.00606712	Down	LBD21	LOB domain-containing protein 21
Cse_sc001169.1_g010.1	30.1038	6.77062	0.224909	0.000328062	Down	PER11	Peroxidase 11	GO:0004601,GO:0005576,GO:0006979,GO:0020037,GO:0042744,GO:0046872,GO:0048511	peroxidase activity|extracellular region|response to oxidative stress|heme binding|hydrogen peroxide catabolic process|metal ion binding|rhythmic process
Cse_sc001178.1_g040.1	4.74872	14.0535	2.95943	0.0412746	Up	FRS5	Protein FAR1-RELATED SEQUENCE 5	GO:0005634,GO:0006355,GO:0008270	nucleus|regulation of transcription, DNA-templated|zinc ion binding
Cse_sc001178.1_g050.1	80.0351	35.7773	0.44702	0.00368897	Down	AHL1	AT-hook motif nuclear-localized protein 1	GO:0003677,GO:0003680,GO:0005634,GO:0005654,GO:0005730,GO:0005737,GO:0005739,GO:0043565,GO:0098687	DNA binding|AT DNA binding|nucleus|nucleoplasm|nucleolus|cytoplasm|mitochondrion|sequence-specific DNA binding|chromosomal region
Cse_sc001181.1_g010.1	591.382	1262.23	2.13438	0.000450775	Up	MEKK1	Mitogen-activated protein kinase kinase kinase 1	GO:0000165,GO:0003677,GO:0004674,GO:0004709,GO:0005524,GO:0005634,GO:0005737,GO:0005768,GO:0005886,GO:0006970,GO:0009409,GO:0009611,GO:0009631,GO:0009651,GO:0010449,GO:0019900,GO:0022622,GO:0023014,GO:0031098,GO:0032147,GO:0045087,GO:0046777,GO:1902065	MAPK cascade|DNA binding|protein serine/threonine kinase activity|MAP kinase kinase kinase activity|ATP binding|nucleus|cytoplasm|endosome|plasma membrane|response to osmotic stress|response to cold|response to wounding|cold acclimation|response to salt stress|root meristem growth|kinase binding|root system development|signal transduction by protein phosphorylation|stress-activated protein kinase…
Cse_sc001186.1_g040.1	27.2321	3.94998	0.145048	2.35161e-05	Down	CSA	Transcription factor CSA	GO:0003677,GO:0005634	DNA binding|nucleus
Cse_sc001186.1_g070.1	575.279	200.658	0.3488	3.17058e-06	Down	FAB1C	Putative 1-phosphatidylinositol-3-phosphate 5-kinase FAB1C	GO:0000285,GO:0005524,GO:0010008,GO:0046854,GO:0090332	1-phosphatidylinositol-3-phosphate 5-kinase activity|ATP binding|endosome membrane|phosphatidylinositol phosphorylation|stomatal closure
Cse_sc001186.1_g080.1	63.9086	164.466	2.57345	0.000144972	Up	At1g66480	Uncharacterized protein At1g66480	GO:0005886	plasma membrane
Cse_sc001187.1_g070.1	16.146	33.0449	2.04663	0.0466769	Up	PATROL1	Protein unc-13 homolog	GO:0005737,GO:0005886,GO:0009506,GO:0010118	cytoplasm|plasma membrane|plasmodesma|stomatal movement
Cse_sc001189.1_g070.1	94.2916	42.6267	0.452073	0.00345445	Down	At1g65240	Aspartic proteinase-like protein 2	GO:0004190,GO:0005886,GO:0006508,GO:0030163,GO:0031225,GO:0046658	aspartic-type endopeptidase activity|plasma membrane|proteolysis|protein catabolic process|anchored component of membrane|anchored component of plasma membrane
Cse_sc001191.1_g010.1	44.2351	107.09	2.42093	0.0343928	Up	At5g38990	Probable receptor-like protein kinase At5g38990
Cse_sc001191.1_g020.1	24.7305	106.038	4.28773	0.000194996	Up	HERK1	Receptor-like protein kinase HERK 1
Cse_sc001192.1_g050.1	1.19096	62.0967	52.1401	1.32147e-14	Up	CBP60A	Calmodulin-binding protein 60 A	GO:0003700,GO:0005516,GO:0005634,GO:0043565,GO:0080142,GO:1902478	DNA-binding transcription factor activity|calmodulin binding|nucleus|sequence-specific DNA binding|regulation of salicylic acid biosynthetic process|negative regulation of defense response to bacterium, incompatible interaction
Cse_sc001194.1_g070.1	29.3704	10.3519	0.35246	0.00762054	Down	VIT_19s0014g02480	Probable bifunctional methylthioribulose-1-phosphate dehydratase/enolase-phosphatase E1 1	GO:0000287,GO:0005737,GO:0008270,GO:0019284,GO:0019509,GO:0043715,GO:0043716,GO:0043874,GO:0046570	magnesium ion binding|cytoplasm|zinc ion binding|L-methionine salvage from S-adenosylmethionine|L-methionine salvage from methylthioadenosine|2,3-diketo-5-methylthiopentyl-1-phosphate enolase activity|2-hydroxy-3-keto-5-methylthiopentenyl-1-phosphate phosphatase activity|acireductone synthase activity|methylthioribulose 1-phosphate dehydratase activity
Cse_sc001197.1_g060.1	13.8885	2.53256	0.182349	0.00306847	Down	CYB561C	Probable transmembrane ascorbate ferrireductase 3	GO:0016021,GO:0016491,GO:0046872	integral component of membrane|oxidoreductase activity|metal ion binding
Cse_sc001198.1_g020.1	1660.33	2.4481	0.00147447	1.14066e-18	Down	CYP96A15	Alkane hydroxylase MAH1	GO:0005506,GO:0005783,GO:0005789,GO:0010025,GO:0016021,GO:0020037,GO:0080133	iron ion binding|endoplasmic reticulum|endoplasmic reticulum membrane|wax biosynthetic process|integral component of membrane|heme binding|midchain alkane hydroxylase activity
Cse_sc001199.1_g020.1	197.11	19.358	0.0982092	2.67441e-06	Down	GDPD3	Glycerophosphodiester phosphodiesterase GDPD3	GO:0006071,GO:0008889,GO:0046475	glycerol metabolic process|glycerophosphodiester phosphodiesterase activity|glycerophospholipid catabolic process
Cse_sc001201.1_g050.1	5.18752	19.601	3.77849	0.00678674	Up		Malate dehydrogenase, cytoplasmic	GO:0005886,GO:0005975,GO:0006099,GO:0006107,GO:0006108,GO:0006734,GO:0030060	plasma membrane|carbohydrate metabolic process|tricarboxylic acid cycle|oxaloacetate metabolic process|malate metabolic process|NADH metabolic process|L-malate dehydrogenase activity
Cse_sc001205.1_g010.1	5397.6	0.699696	0.000129631	9.37784e-26	Down	LTP2	Non-specific lipid-transfer protein 2	GO:0006869,GO:0008289	lipid transport|lipid binding
Cse_sc001205.1_g020.1	1420.4	1.77712	0.00125114	1.71732e-13	Down		Non-specific lipid-transfer protein	GO:0006869,GO:0008289	lipid transport|lipid binding
Cse_sc001205.1_g060.1	344.698	0	0	4.82387e-14	Down		Non-specific lipid-transfer protein 1	GO:0006869,GO:0008289	lipid transport|lipid binding
Cse_sc001207.1_g050.1	36.0002	7.78494	0.216247	9.06048e-05	Down	NUP160	Nuclear pore complex protein NUP160	GO:0005635,GO:0005643,GO:0006952,GO:0009409,GO:0009733,GO:0016973,GO:0017056,GO:0031965	nuclear envelope|nuclear pore|defense response|response to cold|response to auxin|poly(A)+ mRNA export from nucleus|structural constituent of nuclear pore|nuclear membrane
Cse_sc001209.1_g020.1	1540.68	744.931	0.483509	0.000809254	Down	BAM1	Leucine-rich repeat receptor-like serine/threonine-protein kinase BAM1
Cse_sc001210.1_g080.1	30.9161	86.6002	2.80114	0.0131503	Up		Retrovirus-related Pol polyprotein from transposon TNT 1-94	GO:0000943,GO:0003676,GO:0003964,GO:0004190,GO:0004519,GO:0008270,GO:0015074	retrotransposon nucleocapsid|nucleic acid binding|RNA-directed DNA polymerase activity|aspartic-type endopeptidase activity|endonuclease activity|zinc ion binding|DNA integration
Cse_sc001211.1_g010.1	351.789	150.519	0.427869	0.0361337	Down	RGLG1	E3 ubiquitin-protein ligase RGLG1	GO:0004842,GO:0005634,GO:0005886,GO:0009738,GO:0009789,GO:0046872,GO:0070534,GO:0080148	ubiquitin-protein transferase activity|nucleus|plasma membrane|abscisic acid-activated signaling pathway|positive regulation of abscisic acid-activated signaling pathway|metal ion binding|protein K63-linked ubiquitination|negative regulation of response to water deprivation
Cse_sc001211.1_g020.1	14.3125	2.4481	0.171047	0.00290231	Down
Cse_sc001212.1_g030.1	38.4905	79.4219	2.06342	0.0112627	Up	MAP70.3	Microtubule-associated protein 70-3	GO:0005737,GO:0005874,GO:0007010,GO:0008017	cytoplasm|microtubule|cytoskeleton organization|microtubule binding
Cse_sc001214.1_g020.1	26.0155	92.2024	3.54414	9.01568e-06	Up	N	TMV resistance protein N	GO:0005524,GO:0005737,GO:0007165,GO:0009626,GO:0043531	ATP binding|cytoplasm|signal transduction|plant-type hypersensitive response|ADP binding
Cse_sc001217.1_g070.1	41.1214	3.94646	0.095971	0.000365534	Down	PIN2	Auxin efflux carrier component 2	GO:0000323,GO:0001666,GO:0005783,GO:0005886,GO:0009723,GO:0009733,GO:0009734,GO:0009749,GO:0009921,GO:0009925,GO:0009926,GO:0009958,GO:0010252,GO:0010315,GO:0010329,GO:0016021	lytic vacuole|response to hypoxia|endoplasmic reticulum|plasma membrane|response to ethylene|response to auxin|auxin-activated signaling pathway|response to glucose|auxin efflux carrier complex|basal plasma membrane|auxin polar transport|positive gravitropism|auxin homeostasis|auxin efflux|auxin efflux transmembrane transporter activity|integral component of membrane
Cse_sc001218.1_g020.1	85.2791	2.04334	0.0239606	1.25713e-05	Down	DGAT2D	Diacylglycerol O-acyltransferase 2D	GO:0004144,GO:0005789,GO:0005811,GO:0006071,GO:0016021,GO:0019432	diacylglycerol O-acyltransferase activity|endoplasmic reticulum membrane|lipid droplet|glycerol metabolic process|integral component of membrane|triglyceride biosynthetic process
Cse_sc001219.1_g020.1	93.8216	3.32956	0.0354882	0.000192224	Down		Protein translation factor SUI1 homolog	GO:0003743,GO:0006417	translation initiation factor activity|regulation of translation
Cse_sc001220.1_g050.1	299.776	3.20355	0.0106865	1.01633e-15	Down	BGAL13	Beta-galactosidase 13	GO:0004565,GO:0005618,GO:0005773,GO:0005975,GO:0030246,GO:0048046	beta-galactosidase activity|cell wall|vacuole|carbohydrate metabolic process|carbohydrate binding|apoplast
Cse_sc001223.1_g040.1	211.08	505.682	2.39569	0.000100885	Up	At5g02240	Uncharacterized protein At5g02240	GO:0005774,GO:0005829,GO:0005886,GO:0009507,GO:0009570,GO:0009737,GO:0048046	vacuolar membrane|cytosol|plasma membrane|chloroplast|chloroplast stroma|response to abscisic acid|apoplast
Cse_sc001224.1_g010.1	2.16301	18.4623	8.53548	0.000184645	Up	CFIS2	Pre-mRNA cleavage factor Im 25 kDa subunit 2	GO:0003729,GO:0005849,GO:0006378,GO:0006397,GO:0016787,GO:0017091,GO:0046872	mRNA binding|mRNA cleavage factor complex|mRNA polyadenylation|mRNA processing|hydrolase activity|AU-rich element binding|metal ion binding
Cse_sc001226.1_g030.1	8.96419	1.68364	0.187819	0.022437	Down
Cse_sc001229.1_g020.1	1386.05	8.18971	0.00590867	1.82661e-08	Down	GLOX1	Aldehyde oxidase GLOX1	GO:0004031,GO:0005576,GO:0007275,GO:0102797,GO:0102798	aldehyde oxidase activity|extracellular region|multicellular organism development|geranial:oxygen oxidoreductase activity|heptaldehyde:oxygen oxidoreductase activity
Cse_sc001230.1_g070.1	58.4565	14.2191	0.243242	1.28789e-05	Down	At1g20050	Probable 3-beta-hydroxysteroid-Delta(8),Delta(7)-isomerase	GO:0000247,GO:0004769,GO:0005783,GO:0005789,GO:0005886,GO:0016021,GO:0016126,GO:0047750	C-8 sterol isomerase activity|steroid delta-isomerase activity|endoplasmic reticulum|endoplasmic reticulum membrane|plasma membrane|integral component of membrane|sterol biosynthetic process|cholestenol delta-isomerase activity
Cse_sc001230.1_g080.1	15.8923	4.72895	0.297563	0.0181615	Down	At1g20050	Probable 3-beta-hydroxysteroid-Delta(8),Delta(7)-isomerase	GO:0000247,GO:0004769,GO:0005783,GO:0005789,GO:0005886,GO:0016021,GO:0016126,GO:0047750	C-8 sterol isomerase activity|steroid delta-isomerase activity|endoplasmic reticulum|endoplasmic reticulum membrane|plasma membrane|integral component of membrane|sterol biosynthetic process|cholestenol delta-isomerase activity
Cse_sc001231.1_g060.1	33.9891	5.09599	0.14993	7.69581e-06	Down
Cse_sc001232.1_g010.1	1463.11	3298.71	2.25459	0.000158924	Up	NLP7	Protein NLP7	GO:0003677,GO:0003700,GO:0005634,GO:0009414,GO:0010118,GO:0010167,GO:0042128	DNA binding|DNA-binding transcription factor activity|nucleus|response to water deprivation|stomatal movement|response to nitrate|nitrate assimilation
Cse_sc001233.1_g050.1	6.35373	0	0	0.00275252	Down
Cse_sc001233.1_g060.1	22.7578	246.529	10.8327	8.21116e-10	Up	SPAC6G10.03c	probable cardiolipin-specific deacylase, mitochondrial	GO:0004623,GO:0005737,GO:0005743,GO:0005783,GO:0005794,GO:0007006,GO:0032048,GO:0035965,GO:0052689,GO:0055088	phospholipase A2 activity|cytoplasm|mitochondrial inner membrane|endoplasmic reticulum|Golgi apparatus|mitochondrial membrane organization|cardiolipin metabolic process|cardiolipin acyl-chain remodeling|carboxylic ester hydrolase activity|lipid homeostasis
Cse_sc001234.1_g020.1	66.1994	202.383	3.05717	0.00664931	Up		Major allergen Pru ar 1	GO:0006952,GO:0009607	defense response|response to biotic stimulus
Cse_sc001235.1_g010.1	285.789	1688.11	5.90685	0.00246104	Up	CYP90D1	3-epi-6-deoxocathasterone 23-monooxygenase CYP90D1	GO:0004497,GO:0005506,GO:0005789,GO:0007275,GO:0010268,GO:0016021,GO:0016125,GO:0016132,GO:0016709,GO:0020037,GO:0048366,GO:0048441,GO:0048443,GO:0055114	monooxygenase activity|iron ion binding|endoplasmic reticulum membrane|multicellular organism development|brassinosteroid homeostasis|integral component of membrane|sterol metabolic process|brassinosteroid biosynthetic process|oxidoreductase activity, acting on paired donors, with incorporation or reduction of molecular oxygen, NAD(P)H as one donor, and incorporation of one atom of oxygen|heme bi…
Cse_sc001237.1_g030.1	1.96909	44.9346	22.82	1.35211e-11	Up	BHLH130	Transcription factor bHLH130	GO:0001228,GO:0003677,GO:0003700,GO:0005634,GO:0006355,GO:0046983,GO:0048573	DNA-binding transcription activator activity, RNA polymerase II-specific|DNA binding|DNA-binding transcription factor activity|nucleus|regulation of transcription, DNA-templated|protein dimerization activity|photoperiodism, flowering
Cse_sc001238.1_g010.1	1.97676	10.4003	5.26128	0.013431	Up
Cse_sc001238.1_g050.1	49.2355	100.062	2.03231	0.0105077	Up	PP2B11	F-box protein PP2-B11	GO:0005634,GO:0016567,GO:0030246	nucleus|protein ubiquitination|carbohydrate binding
Cse_sc001239.1_g050.1	1339.33	562.882	0.420272	4.98547e-05	Down	HSP70-17	Heat shock 70 kDa protein 17	GO:0005524,GO:0005774,GO:0005783,GO:0005788,GO:0005794,GO:0009507,GO:0034663,GO:0071456,GO:1903298	ATP binding|vacuolar membrane|endoplasmic reticulum|endoplasmic reticulum lumen|Golgi apparatus|chloroplast|endoplasmic reticulum chaperone complex|cellular response to hypoxia|negative regulation of hypoxia-induced intrinsic apoptotic signaling pathway
Cse_sc001240.1_g050.1	154.852	449.867	2.90515	2.30587e-06	Up	KRP1	Calcium-binding protein KRP1	GO:0005509,GO:0080167	calcium ion binding|response to karrikin
Cse_sc001240.1_g080.1	172.171	775.185	4.50242	3.65084e-06	Up	At4g27290	G-type lectin S-receptor-like serine/threonine-protein kinase At4g27290
Cse_sc001243.1_g020.1	385.055	23.5633	0.0611947	2.0312e-19	Down
Cse_sc001244.1_g080.1	81.7069	31.9118	0.390564	0.000779491	Down	At1g80640	Probable receptor-like protein kinase At1g80640
Cse_sc001244.1_g090.1	1362.81	9.28331	0.00681191	2.25183e-05	Down	Os04g0656100	Plasma membrane ATPase	GO:0005524,GO:0005886,GO:0008553,GO:0016021,GO:0046872,GO:0051453,GO:0120029,GO:1902600	ATP binding|plasma membrane|proton-exporting ATPase activity, phosphorylative mechanism|integral component of membrane|metal ion binding|regulation of intracellular pH|proton export across plasma membrane|proton transmembrane transport
Cse_sc001245.1_g020.1	39.7024	97.989	2.46809	0.000755586	Up	OOP	Organellar oligopeptidase A, chloroplastic/mitochondrial	GO:0004222,GO:0005759,GO:0005829,GO:0006508,GO:0006518,GO:0009507,GO:0009570,GO:0046872	metalloendopeptidase activity|mitochondrial matrix|cytosol|proteolysis|peptide metabolic process|chloroplast|chloroplast stroma|metal ion binding
Cse_sc001247.1_g050.1	8.9481	154.908	17.3118	0.000765613	Up	NAC090	NAC domain-containing protein 90	GO:0003677,GO:0003700,GO:0005634	DNA binding|DNA-binding transcription factor activity|nucleus
Cse_sc001249.1_g080.1	118.563	255.84	2.15785	0.00117636	Up
Cse_sc001254.1_g040.1	57.1653	11.0172	0.192725	0.00318158	Down	At1g73020	Anoctamin-like protein At1g73020	GO:0005254,GO:0034707	chloride channel activity|chloride channel complex
Cse_sc001254.1_g140.1	9.42797	1.46416	0.155299	0.0342341	Down	ELF3-2	ELF3-like protein 2	GO:0005634,GO:0009908,GO:2000028	nucleus|flower development|regulation of photoperiodism, flowering
Cse_sc001255.1_g120.1	31.1232	0	0	8.58865e-05	Down	ATL29	RING-H2 finger protein ATL29	GO:0016021,GO:0016567,GO:0016740,GO:0046872	integral component of membrane|protein ubiquitination|transferase activity|metal ion binding
Cse_sc001269.1_g070.1	233.951	504.201	2.15515	0.0348268	Up	CRPK1	Cold-responsive protein kinase 1	GO:0002237,GO:0004674,GO:0005524,GO:0005886,GO:0009409,GO:0009625,GO:0033160,GO:0046777,GO:0050826	response to molecule of bacterial origin|protein serine/threonine kinase activity|ATP binding|plasma membrane|response to cold|response to insect|positive regulation of protein import into nucleus, translocation|protein autophosphorylation|response to freezing
Cse_sc001269.1_g080.1	11.8359	0	0	0.00391706	Down
Cse_sc001270.1_g050.1	1968.36	98.1016	0.0498392	7.08085e-23	Down	At4g28780	GDSL esterase/lipase At4g28780	GO:0005576,GO:0016042,GO:0016788	extracellular region|lipid catabolic process|hydrolase activity, acting on ester bonds
Cse_sc001273.1_g070.1	27.5921	9.29967	0.337041	0.00781832	Down	PR-1	Pathogenesis-related protein PR-1	GO:0005576,GO:0006952,GO:0009607	extracellular region|defense response|response to biotic stimulus
Cse_sc001274.1_g030.1	34.2745	0	0	1.79917e-05	Down	GLTP1	Glycolipid transfer protein 1	GO:0005829,GO:0005886,GO:0008289,GO:0016020,GO:0035627,GO:0120009,GO:0120013,GO:1902387,GO:1902388	cytosol|plasma membrane|lipid binding|membrane|ceramide transport|intermembrane lipid transfer|intermembrane lipid transfer activity|ceramide 1-phosphate binding|ceramide 1-phosphate transporter activity
Cse_sc001274.1_g040.1	40.9466	0	0	0.000124904	Down	RIC7	CRIB domain-containing protein RIC7	GO:0005634,GO:0005737,GO:0005886,GO:0009416,GO:0040008	nucleus|cytoplasm|plasma membrane|response to light stimulus|regulation of growth
Cse_sc001274.1_g050.1	33.6584	442.373	13.143	5.57857e-05	Up	PXG3	Probable peroxygenase 3	GO:0004497,GO:0005509,GO:0005773,GO:0005783,GO:0009269,GO:0009409,GO:0009620,GO:0009651,GO:0009737,GO:0009751,GO:0010118,GO:0012511,GO:0031407,GO:0031969,GO:0043231,GO:0050832,GO:1902609,GO:1990137,GO:2000377	monooxygenase activity|calcium ion binding|vacuole|endoplasmic reticulum|response to desiccation|response to cold|response to fungus|response to salt stress|response to abscisic acid|response to salicylic acid|stomatal movement|monolayer-surrounded lipid storage body|oxylipin metabolic process|chloroplast membrane|intracellular membrane-bounded organelle|defense response to fungus|(R)-2-hydroxy-a…
Cse_sc001274.1_g100.1	90.4962	30.4167	0.336111	9.87138e-05	Down	SKOR	Potassium channel SKOR	GO:0006813,GO:0015271,GO:0016021,GO:0034765,GO:0055075	potassium ion transport|outward rectifier potassium channel activity|integral component of membrane|regulation of ion transmembrane transport|potassium ion homeostasis
Cse_sc001275.1_g050.1	77.2132	25.3049	0.327727	0.000137902	Down	ITN1	Ankyrin repeat-containing protein ITN1	GO:0005634,GO:0005886,GO:0009651,GO:0016020,GO:0016021,GO:0034613	nucleus|plasma membrane|response to salt stress|membrane|integral component of membrane|cellular protein localization
Cse_sc001276.1_g080.1	2.77098	13.579	4.90042	0.00786311	Up
Cse_sc001276.1_g090.1	62.4105	28.8968	0.463013	0.00931245	Down	YLMG2	YlmG homolog protein 2, chloroplastic	GO:0009507,GO:0009535,GO:0010020,GO:0016021,GO:0090143	chloroplast|chloroplast thylakoid membrane|chloroplast fission|integral component of membrane|nucleoid organization
Cse_sc001278.1_g040.1	199.498	25.3156	0.126896	3.4602e-14	Down	At1g29660	GDSL esterase/lipase At1g29660	GO:0005634,GO:0009627,GO:0016042,GO:0016788,GO:0048046	nucleus|systemic acquired resistance|lipid catabolic process|hydrolase activity, acting on ester bonds|apoplast
Cse_sc001279.1_g010.1	68.0919	16.4245	0.241211	6.95788e-06	Down	MIK2	MDIS1-interacting receptor like kinase 2
Cse_sc001280.1_g080.1	32.2431	201.944	6.26316	8.13329e-07	Up
Cse_sc001283.1_g070.1	7.91644	63.7616	8.05433	0.0010306	Up	ANX2	Receptor-like protein kinase ANXUR2
Cse_sc001285.1_g020.1	897.353	73.7059	0.082137	5.11071e-12	Down		Caffeic acid 3-O-methyltransferase	GO:0009809,GO:0046983,GO:0047763	lignin biosynthetic process|protein dimerization activity|caffeate O-methyltransferase activity
Cse_sc001285.1_g040.1	585.869	158.419	0.270401	1.25512e-08	Down	COMT1	Caffeic acid 3-O-methyltransferase 1	GO:0009809,GO:0046983,GO:0047763	lignin biosynthetic process|protein dimerization activity|caffeate O-methyltransferase activity
Cse_sc001287.1_g090.1	14.4816	73.898	5.10287	2.55178e-07	Up	At4g13800	Probable magnesium transporter NIPA2	GO:0005769,GO:0005886,GO:0015095,GO:0015693,GO:0016021	early endosome|plasma membrane|magnesium ion transmembrane transporter activity|magnesium ion transport|integral component of membrane
Cse_sc001287.1_g110.1	380.021	951.172	2.50295	2.53165e-05	Up	COI1	Coronatine-insensitive protein 1	GO:0006952,GO:0009611,GO:0009625,GO:0009641,GO:0009753,GO:0009861,GO:0009867,GO:0009901,GO:0009909,GO:0010118,GO:0010218,GO:0016567,GO:0019005,GO:0031146,GO:0031348,GO:0042742,GO:0048364,GO:0048443,GO:0050832	defense response|response to wounding|response to insect|shade avoidance|response to jasmonic acid|jasmonic acid and ethylene-dependent systemic resistance|jasmonic acid mediated signaling pathway|anther dehiscence|regulation of flower development|stomatal movement|response to far red light|protein ubiquitination|SCF ubiquitin ligase complex|SCF-dependent proteasomal ubiquitin-dependent protein c…
Cse_sc001288.1_g100.1	39.1331	0.330986	0.00845797	3.08755e-12	Down	RPA1A	Replication protein A 70 kDa DNA-binding subunit A	GO:0000723,GO:0000724,GO:0000784,GO:0000790,GO:0003684,GO:0003697,GO:0005662,GO:0006261,GO:0006268,GO:0006281,GO:0006289,GO:0007004,GO:0007140,GO:0007141,GO:0009555,GO:0043047,GO:0043565,GO:0046872,GO:0051026,GO:0051321	telomere maintenance|double-strand break repair via homologous recombination|nuclear chromosome, telomeric region|nuclear chromatin|damaged DNA binding|single-stranded DNA binding|DNA replication factor A complex|DNA-dependent DNA replication|DNA unwinding involved in DNA replication|DNA repair|nucleotide-excision repair|telomere maintenance via telomerase|male meiotic nuclear division|male meios…
Cse_sc001289.1_g040.1	4.6545	0	0	0.0132255	Down
Cse_sc001290.1_g070.1	79.2196	34.7628	0.438816	0.00399948	Down	SIS3	E3 ubiquitin-protein ligase SIS3	GO:0004842,GO:0010182,GO:0016021,GO:0016567,GO:0046872	ubiquitin-protein transferase activity|sugar mediated signaling pathway|integral component of membrane|protein ubiquitination|metal ion binding
Cse_sc001290.1_g100.1	3.45587	0	0	0.0445296	Down
Cse_sc001291.1_g020.1	18.0382	4.47174	0.247904	0.00541167	Down	NCL	Sodium/calcium exchanger NCL	GO:0000325,GO:0005432,GO:0005509,GO:0005773,GO:0005774,GO:0005886,GO:0006874,GO:0009506,GO:0015369,GO:0016020,GO:0016021,GO:0055074,GO:0070588,GO:0071472	plant-type vacuole|calcium:sodium antiporter activity|calcium ion binding|vacuole|vacuolar membrane|plasma membrane|cellular calcium ion homeostasis|plasmodesma|calcium:proton antiporter activity|membrane|integral component of membrane|calcium ion homeostasis|calcium ion transmembrane transport|cellular response to salt stress
Cse_sc001292.1_g010.1	21.5957	9.36795	0.433787	0.0431202	Down	SPBC543.02c	DnaJ homolog subfamily C member 7 homolog	GO:0005829,GO:0030544,GO:0051085	cytosol|Hsp70 protein binding|chaperone cofactor-dependent protein refolding
Cse_sc001292.1_g050.1	58.3998	15.856	0.271508	6.03931e-05	Down	MIK2	MDIS1-interacting receptor like kinase 2
Cse_sc001293.1_g020.1	12.1517	1.13317	0.0932523	0.00839299	Down	At2g30020	Probable protein phosphatase 2C 25	GO:0004722,GO:0005634,GO:0009536,GO:0009611,GO:0009620,GO:0009738,GO:0046872,GO:0050832	protein serine/threonine phosphatase activity|nucleus|plastid|response to wounding|response to fungus|abscisic acid-activated signaling pathway|metal ion binding|defense response to fungus
Cse_sc001293.1_g040.1	29.1488	1.45514	0.0499212	0.000238996	Down	At2g30020	Probable protein phosphatase 2C 25	GO:0004722,GO:0005634,GO:0009536,GO:0009611,GO:0009620,GO:0009738,GO:0046872,GO:0050832	protein serine/threonine phosphatase activity|nucleus|plastid|response to wounding|response to fungus|abscisic acid-activated signaling pathway|metal ion binding|defense response to fungus
Cse_sc001296.1_g030.1	23.6808	3.0166	0.127386	4.15016e-05	Down	OFP7	Transcription repressor OFP7	GO:0005634,GO:0005886,GO:0045892	nucleus|plasma membrane|negative regulation of transcription, DNA-templated
Cse_sc001298.1_g030.1	20.6205	2.36531	0.114707	0.00216802	Down
Cse_sc001298.1_g070.1	15.0233	86.5965	5.76414	1.5268e-08	Up	PERK4	Proline-rich receptor-like protein kinase PERK4
Cse_sc001298.1_g140.1	14.4557	48.3095	3.34191	0.000329496	Up	CYP76B10	Geraniol 8-hydroxylase	GO:0005506,GO:0005789,GO:0016021,GO:0016099,GO:0016709,GO:0020037	iron ion binding|endoplasmic reticulum membrane|integral component of membrane|monoterpenoid biosynthetic process|oxidoreductase activity, acting on paired donors, with incorporation or reduction of molecular oxygen, NAD(P)H as one donor, and incorporation of one atom of oxygen|heme binding
Cse_sc001304.1_g010.1	44.4714	609.885	13.7141	3.19708e-21	Up	GPAT3	Probable glycerol-3-phosphate acyltransferase 3	GO:0004366,GO:0010143,GO:0016020,GO:0016021,GO:0016024,GO:0016791,GO:0090447,GO:0102420	glycerol-3-phosphate O-acyltransferase activity|cutin biosynthetic process|membrane|integral component of membrane|CDP-diacylglycerol biosynthetic process|phosphatase activity|glycerol-3-phosphate 2-O-acyltransferase activity|sn-1-glycerol-3-phosphate C16:0-DCA-CoA acyl transferase activity
Cse_sc001304.1_g050.1	12.8329	1.95888	0.152645	0.0249259	Down	At3g25750	Putative F-box protein At3g25750
Cse_sc001305.1_g010.1	765.551	2664.28	3.48021	1.10864e-08	Up	ZIFL1	Protein ZINC INDUCED FACILITATOR-LIKE 1	GO:0005886,GO:0009414,GO:0009630,GO:0009705,GO:0010540,GO:0016021,GO:0022821,GO:0048364,GO:0080167,GO:0090333	plasma membrane|response to water deprivation|gravitropism|plant-type vacuole membrane|basipetal auxin transport|integral component of membrane|potassium ion antiporter activity|root development|response to karrikin|regulation of stomatal closure
Cse_sc001310.1_g040.1	154.559	45.3792	0.293604	3.04036e-06	Down	At2g27500	Glucan endo-1,3-beta-glucosidase 14	GO:0005576,GO:0005618,GO:0005634,GO:0005737,GO:0005975,GO:0006952,GO:0042973,GO:0046658,GO:0071555	extracellular region|cell wall|nucleus|cytoplasm|carbohydrate metabolic process|defense response|glucan endo-1,3-beta-D-glucosidase activity|anchored component of plasma membrane|cell wall organization
Cse_sc001313.1_g010.1	12.3778	0	0	0.000530459	Down	KN	Syntaxin-related protein KNOLLE	GO:0000149,GO:0005484,GO:0005886,GO:0006886,GO:0006887,GO:0006906,GO:0007049,GO:0009504,GO:0009506,GO:0009524,GO:0012505,GO:0016021,GO:0031201,GO:0048278,GO:0051301	SNARE binding|SNAP receptor activity|plasma membrane|intracellular protein transport|exocytosis|vesicle fusion|cell cycle|cell plate|plasmodesma|phragmoplast|endomembrane system|integral component of membrane|SNARE complex|vesicle docking|cell division
Cse_sc001315.1_g020.1	133.586	5.84409	0.0437479	1.41459e-06	Down	FUS3	B3 domain-containing transcription factor FUS3	GO:0003677,GO:0003700,GO:0005634,GO:0008284,GO:0009733,GO:0009789,GO:0009793,GO:0010116,GO:0010228,GO:0010262,GO:0010373,GO:0019900,GO:0045995,GO:0099402	DNA binding|DNA-binding transcription factor activity|nucleus|positive regulation of cell proliferation|response to auxin|positive regulation of abscisic acid-activated signaling pathway|embryo development ending in seed dormancy|positive regulation of abscisic acid biosynthetic process|vegetative to reproductive phase transition of meristem|somatic embryogenesis|negative regulation of gibberelli…
Cse_sc001315.1_g040.1	115.175	22.8276	0.198199	1.37918e-08	Down	SUVR4	Histone-lysine N-methyltransferase SUVR4	GO:0005694,GO:0005730,GO:0008270,GO:0009506,GO:0018024,GO:0034968	chromosome|nucleolus|zinc ion binding|plasmodesma|histone-lysine N-methyltransferase activity|histone lysine methylation
Cse_sc001316.1_g030.1	0	6.47186	Inf	0.0278817	Up	WAK1	Wall-associated receptor kinase 1
Cse_sc001317.1_g010.1	353.359	873.336	2.47153	3.97641e-05	Up	RHG1A	Probable E3 ubiquitin-protein ligase RHG1A	GO:0046872,GO:0061630	metal ion binding|ubiquitin protein ligase activity
Cse_sc001317.1_g020.1	22.6163	0.377723	0.0167014	0.00085665	Down	SUS6	Sucrose synthase 6	GO:0005576,GO:0005618,GO:0005985,GO:0016157,GO:0080165	extracellular region|cell wall|sucrose metabolic process|sucrose synthase activity|callose deposition in phloem sieve plate
Cse_sc001317.1_g070.1	93.4478	25.7225	0.27526	0.024312	Down	At1g17710	Inorganic pyrophosphatase 2	GO:0004427,GO:0046872,GO:0051262,GO:0052731,GO:0052732	inorganic diphosphatase activity|metal ion binding|protein tetramerization|phosphocholine phosphatase activity|phosphoethanolamine phosphatase activity
Cse_sc001318.1_g120.1	281.891	20.0864	0.0712558	5.78876e-22	Down	MDL3	(R)-mandelonitrile lyase 3	GO:0005773,GO:0016614,GO:0033095,GO:0046593,GO:0050660	vacuole|oxidoreductase activity, acting on CH-OH group of donors|aleurone grain|mandelonitrile lyase activity|flavin adenine dinucleotide binding
Cse_sc001321.1_g010.1	1166.29	63.6721	0.0545936	1.62743e-07	Down		Actin	GO:0005524,GO:0005737,GO:0005856	ATP binding|cytoplasm|cytoskeleton
Cse_sc001321.1_g050.1	289.107	64.7719	0.224041	0.000129236	Down	ZIP5	Zinc transporter 5	GO:0005385,GO:0005886,GO:0016021,GO:0071577	zinc ion transmembrane transporter activity|plasma membrane|integral component of membrane|zinc ion transmembrane transport
Cse_sc001322.1_g050.1	536.053	150.698	0.281125	3.31536e-08	Down
Cse_sc001323.1_g070.1	8.27065	0	0	0.000390716	Down	At1g65750	Putative ribonuclease H protein At1g65750	GO:0003676,GO:0004523,GO:0046872	nucleic acid binding|RNA-DNA hybrid ribonuclease activity|metal ion binding
Cse_sc001325.1_g040.1	305.925	117.722	0.384807	0.000355962	Down	SAMT	Salicylate carboxymethyltransferase	GO:0008168,GO:0046872	methyltransferase activity|metal ion binding
Cse_sc001326.1_g060.1	7.36686	65.1065	8.83776	0.00305559	Up	CYP707A2	Abscisic acid 8'-hydroxylase 2	GO:0004497,GO:0005506,GO:0009639,GO:0009687,GO:0010114,GO:0010295,GO:0016021,GO:0016125,GO:0020037,GO:0046345,GO:0048838,GO:0055114	monooxygenase activity|iron ion binding|response to red or far red light|abscisic acid metabolic process|response to red light|(+)-abscisic acid 8'-hydroxylase activity|integral component of membrane|sterol metabolic process|heme binding|abscisic acid catabolic process|release of seed from dormancy|oxidation-reduction process
Cse_sc001328.1_g030.1	1485.26	643.176	0.433039	0.00011023	Down	SSM4	ERAD-associated E3 ubiquitin-protein ligase DOA10	GO:0000837,GO:0004842,GO:0005635,GO:0005637,GO:0008270,GO:0016021,GO:0030176,GO:0030433,GO:0061630	Doa10p ubiquitin ligase complex|ubiquitin-protein transferase activity|nuclear envelope|nuclear inner membrane|zinc ion binding|integral component of membrane|integral component of endoplasmic reticulum membrane|ubiquitin-dependent ERAD pathway|ubiquitin protein ligase activity
Cse_sc001334.1_g040.1	6.98645	0	0	0.00464014	Down	RD22	BURP domain protein RD22	GO:0005768,GO:0005794,GO:0005802,GO:0009651	endosome|Golgi apparatus|trans-Golgi network|response to salt stress
Cse_sc001337.1_g030.1	0.574332	12.7154	22.1394	0.000201153	Up
Cse_sc001338.1_g030.1	3846.13	259.316	0.0674225	2.48598e-12	Down	SBT1.2	Subtilisin-like protease SBT1.2	GO:0004252,GO:0009897,GO:0010103,GO:0042127,GO:0048046	serine-type endopeptidase activity|external side of plasma membrane|stomatal complex morphogenesis|regulation of cell proliferation|apoplast
Cse_sc001338.1_g060.1	124.681	4.31869	0.0346378	1.30639e-14	Down	SBT1.8	Subtilisin-like protease SBT1.8	GO:0004252,GO:0005576,GO:0005618,GO:0005794,GO:0009505,GO:0009506	serine-type endopeptidase activity|extracellular region|cell wall|Golgi apparatus|plant-type cell wall|plasmodesma
Cse_sc001340.1_g050.1	121.671	4.09402	0.0336482	8.13912e-06	Down	PRAF1	PH, RCC1 and FYVE domains-containing protein 1	GO:0017112,GO:0035091,GO:0046872,GO:0070300	Rab guanyl-nucleotide exchange factor activity|phosphatidylinositol binding|metal ion binding|phosphatidic acid binding
Cse_sc001345.1_g010.1	197.821	1071.88	5.41847	1.76853e-13	Up	ABC1K8	Protein ACTIVITY OF BC1 COMPLEX KINASE 8, chloroplastic	GO:0005215,GO:0005524,GO:0006979,GO:0007623,GO:0009507,GO:0009644,GO:0009941,GO:0010150,GO:0016021,GO:0016301,GO:0031969,GO:0034599,GO:0042542,GO:0046467,GO:0046686,GO:0055072,GO:1901031,GO:1990641	transporter activity|ATP binding|response to oxidative stress|circadian rhythm|chloroplast|response to high light intensity|chloroplast envelope|leaf senescence|integral component of membrane|kinase activity|chloroplast membrane|cellular response to oxidative stress|response to hydrogen peroxide|membrane lipid biosynthetic process|response to cadmium ion|iron ion homeostasis|regulation of respons…
Cse_sc001346.1_g010.1	3.43856	0	0	0.0448547	Down	CASC125	(E)-beta-farnesene synthase	GO:0000287,GO:0005737,GO:0010333,GO:0016114	magnesium ion binding|cytoplasm|terpene synthase activity|terpenoid biosynthetic process
Cse_sc001346.1_g070.1	256.821	995.622	3.87671	1.72676e-09	Up	RHB1A	Probable E3 ubiquitin-protein ligase RHB1A	GO:0004842,GO:0046872	ubiquitin-protein transferase activity|metal ion binding
Cse_sc001347.1_g020.1	600.345	298.822	0.49775	0.00196755	Down	UGT80A2	Sterol 3-beta-glucosyltransferase UGT80A2	GO:0005886,GO:0005975,GO:0008194,GO:0016020,GO:0016125,GO:0016126,GO:0016906,GO:0030259,GO:0043231,GO:0048316,GO:0051507,GO:0102202,GO:0102203,GO:0102205	plasma membrane|carbohydrate metabolic process|UDP-glycosyltransferase activity|membrane|sterol metabolic process|sterol biosynthetic process|sterol 3-beta-glucosyltransferase activity|lipid glycosylation|intracellular membrane-bounded organelle|seed development|beta-sitosterol UDP-glucosyltransferase activity|soladodine glucosyltransferase activity|brassicasterol glucosyltransferase activity|cho…
Cse_sc001348.1_g030.1	1339.43	331.51	0.247502	0.000286111	Down	AED3	Aspartyl protease AED3	GO:0000166,GO:0004190,GO:0005618,GO:0006508,GO:0009505,GO:0009627,GO:0030163,GO:0043067,GO:0048046	nucleotide binding|aspartic-type endopeptidase activity|cell wall|proteolysis|plant-type cell wall|systemic acquired resistance|protein catabolic process|regulation of programmed cell death|apoplast
Cse_sc001348.1_g060.1	946.601	253.346	0.267638	0.000177859	Down	HPAT3	Hydroxyproline O-arabinosyltransferase 3	GO:0005768,GO:0005794,GO:0005802,GO:0016021,GO:1990585	endosome|Golgi apparatus|trans-Golgi network|integral component of membrane|hydroxyproline O-arabinosyltransferase activity
Cse_sc001351.1_g030.1	20.8015	2.9248	0.140605	0.00022274	Down	HISN7	Bifunctional phosphatase IMPL2, chloroplastic	GO:0000105,GO:0004401,GO:0006021,GO:0008934,GO:0009507,GO:0046854,GO:0046872,GO:0052832,GO:0052833,GO:0052834	histidine biosynthetic process|histidinol-phosphatase activity|inositol biosynthetic process|inositol monophosphate 1-phosphatase activity|chloroplast|phosphatidylinositol phosphorylation|metal ion binding|inositol monophosphate 3-phosphatase activity|inositol monophosphate 4-phosphatase activity|inositol monophosphate phosphatase activity
Cse_sc001352.1_g030.1	21.6019	2.03265	0.0940959	0.0166699	Down	ARSA2	ATPase ARSA2	GO:0005524,GO:0005829,GO:0006620,GO:0016887,GO:0043529,GO:0043621,GO:0048767,GO:0071816	ATP binding|cytosol|posttranslational protein targeting to endoplasmic reticulum membrane|ATPase activity|GET complex|protein self-association|root hair elongation|tail-anchored membrane protein insertion into ER membrane
Cse_sc001354.1_g030.1	110.828	287.607	2.59507	0.00014182	Up	MCD1	Protein MULTIPLE CHLOROPLAST DIVISION SITE 1	GO:0009706,GO:0009941,GO:0010020,GO:0016021	chloroplast inner membrane|chloroplast envelope|chloroplast fission|integral component of membrane
Cse_sc001357.1_g030.1	168.269	398.151	2.36615	0.00110141	Up	NLP6	Protein NLP6	GO:0003677,GO:0003700,GO:0005634	DNA binding|DNA-binding transcription factor activity|nucleus
Cse_sc001358.1_g010.1	218.949	13.2136	0.06035	1.37653e-10	Down	RAB2BV	Ras-related protein Rab2BV	GO:0003924,GO:0005525,GO:0005886	GTPase activity|GTP binding|plasma membrane
Cse_sc001358.1_g020.1	48.5981	2625.78	54.0306	1.71999e-14	Up		Cucumisin	GO:0004252,GO:0005576	serine-type endopeptidase activity|extracellular region
Cse_sc001360.1_g030.1	0.287166	10.1324	35.2841	0.00124207	Up	WAKL2	Wall-associated receptor kinase-like 2
Cse_sc001361.1_g070.1	439.626	183.977	0.418486	0.000146378	Down
Cse_sc001362.1_g050.1	264.188	74.0579	0.280323	1.36162e-07	Down	CAB8	Chlorophyll a-b binding protein 8, chloroplastic	GO:0009416,GO:0009522,GO:0009523,GO:0009535,GO:0009768,GO:0010287,GO:0016021,GO:0016168,GO:0018298,GO:0046872	response to light stimulus|photosystem I|photosystem II|chloroplast thylakoid membrane|photosynthesis, light harvesting in photosystem I|plastoglobule|integral component of membrane|chlorophyll binding|protein-chromophore linkage|metal ion binding
Cse_sc001363.1_g020.1	69.2413	4098.28	59.1883	2.40609e-53	Up	CYP84A1	Cytochrome P450 84A1	GO:0004497,GO:0005506,GO:0005783,GO:0009699,GO:0009809,GO:0010224,GO:0016020,GO:0016021,GO:0016709,GO:0020037	monooxygenase activity|iron ion binding|endoplasmic reticulum|phenylpropanoid biosynthetic process|lignin biosynthetic process|response to UV-B|membrane|integral component of membrane|oxidoreductase activity, acting on paired donors, with incorporation or reduction of molecular oxygen, NAD(P)H as one donor, and incorporation of one atom of oxygen|heme binding
Cse_sc001364.1_g070.1	42.0171	7.90546	0.188149	1.00202e-05	Down	PBL8	Probable serine/threonine-protein kinase PBL8
Cse_sc001365.1_g020.1	67.0201	335.327	5.00338	0.00150279	Up	WRKY4	Probable WRKY transcription factor 4	GO:0003677,GO:0003700,GO:0005634,GO:0006952,GO:0009723,GO:0009751,GO:0009753,GO:0043565,GO:0044212,GO:0046872,GO:1900150,GO:1900425	DNA binding|DNA-binding transcription factor activity|nucleus|defense response|response to ethylene|response to salicylic acid|response to jasmonic acid|sequence-specific DNA binding|transcription regulatory region DNA binding|metal ion binding|regulation of defense response to fungus|negative regulation of defense response to bacterium
Cse_sc001366.1_g060.1	18.2907	164.558	8.9968	8.49725e-05	Up	At1g76070	Uncharacterized protein At1g76070	GO:0005886	plasma membrane
Cse_sc001367.1_g030.1	3444.58	11129.7	3.23107	4.69887e-08	Up	LACS1	Long chain acyl-CoA synthetase 1	GO:0004467,GO:0005524,GO:0005783,GO:0006631,GO:0010025,GO:0010143,GO:0031957,GO:0102391	long-chain fatty acid-CoA ligase activity|ATP binding|endoplasmic reticulum|fatty acid metabolic process|wax biosynthetic process|cutin biosynthetic process|very long-chain fatty acid-CoA ligase activity|decanoate-CoA ligase activity
Cse_sc001372.1_g030.1	306.044	1.35266	0.00441981	2.77127e-43	Down	BAMT	Benzoate carboxyl methyltransferase	GO:0008168	methyltransferase activity
Cse_sc001373.1_g010.1	45.4701	10.4273	0.229323	0.00687085	Down
Cse_sc001373.1_g090.1	116.565	261.638	2.24457	0.000517661	Up	ABCB11	ABC transporter B family member 11	GO:0005524,GO:0005886,GO:0009506,GO:0010329,GO:0010540,GO:0016021,GO:0042626	ATP binding|plasma membrane|plasmodesma|auxin efflux transmembrane transporter activity|basipetal auxin transport|integral component of membrane|ATPase activity, coupled to transmembrane movement of substances
Cse_sc001374.1_g090.1	38.7566	18.1871	0.469265	0.0245287	Down
Cse_sc001384.1_g160.1	50.8534	1.94986	0.0383429	1.64392e-12	Down	HIPP37	Heavy metal-associated isoprenylated plant protein 37	GO:0030001,GO:0046872	metal ion transport|metal ion binding
Cse_sc001384.1_g180.1	3556.17	1274.15	0.358292	2.24306e-06	Down	FAB1C	Putative 1-phosphatidylinositol-3-phosphate 5-kinase FAB1C	GO:0000285,GO:0005524,GO:0010008,GO:0046854,GO:0090332	1-phosphatidylinositol-3-phosphate 5-kinase activity|ATP binding|endosome membrane|phosphatidylinositol phosphorylation|stomatal closure
Cse_sc001385.1_g030.1	281.95	44.1342	0.156532	1.17831e-10	Down	PAH2	Phosphatidate phosphatase PAH2	GO:0005829,GO:0008195,GO:0008654,GO:0016020,GO:0019375,GO:0048046	cytosol|phosphatidate phosphatase activity|phospholipid biosynthetic process|membrane|galactolipid biosynthetic process|apoplast
Cse_sc001386.1_g050.1	27.2984	12.6434	0.463155	0.0466144	Down	PARP2	Poly [ADP-ribose] polymerase 2	GO:0003677,GO:0003950,GO:0005634,GO:0005730,GO:0006302,GO:0070212,GO:1990404	DNA binding|NAD+ ADP-ribosyltransferase activity|nucleus|nucleolus|double-strand break repair|protein poly-ADP-ribosylation|protein ADP-ribosylase activity
Cse_sc001388.1_g020.1	464.222	1180.92	2.54388	1.35596e-05	Up	At1g30090	F-box/kelch-repeat protein At1g30090
Cse_sc001388.1_g060.1	305.738	667.364	2.1828	0.00895724	Up	GLO1	(S)-2-hydroxy-acid oxidase GLO1	GO:0005634,GO:0005777,GO:0008891,GO:0009506,GO:0009507,GO:0009570,GO:0009735,GO:0009854,GO:0010181,GO:0016020,GO:0022626,GO:0042742,GO:0048046,GO:0050665,GO:0052852,GO:0052853,GO:0052854	nucleus|peroxisome|glycolate oxidase activity|plasmodesma|chloroplast|chloroplast stroma|response to cytokinin|oxidative photosynthetic carbon pathway|FMN binding|membrane|cytosolic ribosome|defense response to bacterium|apoplast|hydrogen peroxide biosynthetic process|very-long-chain-(S)-2-hydroxy-acid oxidase activity|long-chain-(S)-2-hydroxy-long-chain-acid oxidase activity|medium-chain-(S)-2-h…
Cse_sc001388.1_g070.1	32.5782	85.113	2.61257	0.000850286	Up	PDR17	Phosphatidylinositol transfer protein PDR17	GO:0005768,GO:0005829,GO:0006658,GO:0008526,GO:0008654,GO:0015914,GO:0016126,GO:0042493,GO:0043001,GO:0071944,GO:1901352,GO:2001247	endosome|cytosol|phosphatidylserine metabolic process|phosphatidylinositol transporter activity|phospholipid biosynthetic process|phospholipid transport|sterol biosynthetic process|response to drug|Golgi to plasma membrane protein transport|cell periphery|negative regulation of phosphatidylglycerol biosynthetic process|positive regulation of phosphatidylcholine biosynthetic process
Cse_sc001388.1_g080.1	60.9489	6.47903	0.106303	8.68057e-10	Down	RLP29	Receptor like protein 29	GO:0005886,GO:0009505,GO:0016021,GO:0031225	plasma membrane|plant-type cell wall|integral component of membrane|anchored component of membrane
Cse_sc001389.1_g080.1	0	7.8694	Inf	0.00153114	Up	HEN4	KH domain-containing protein HEN4	GO:0003723,GO:0006397,GO:0009911,GO:0016607,GO:0030154,GO:0048497	RNA binding|mRNA processing|positive regulation of flower development|nuclear speck|cell differentiation|maintenance of floral organ identity
Cse_sc001390.1_g040.1	633.603	3459	5.45926	0.00061602	Up	BGAL1	Beta-galactosidase 1	GO:0004565,GO:0005618,GO:0005773,GO:0005975,GO:0009505,GO:0009506,GO:0030246,GO:0048046	beta-galactosidase activity|cell wall|vacuole|carbohydrate metabolic process|plant-type cell wall|plasmodesma|carbohydrate binding|apoplast
Cse_sc001391.1_g080.1	23.5193	1.45514	0.0618701	1.01456e-06	Down
Cse_sc001399.1_g060.1	38.4323	19.0308	0.495177	0.034053	Down	RPA1A	Replication protein A 70 kDa DNA-binding subunit A	GO:0000723,GO:0000724,GO:0000784,GO:0000790,GO:0003684,GO:0003697,GO:0005662,GO:0006261,GO:0006268,GO:0006281,GO:0006289,GO:0007004,GO:0007140,GO:0007141,GO:0009555,GO:0043047,GO:0043565,GO:0046872,GO:0051026,GO:0051321	telomere maintenance|double-strand break repair via homologous recombination|nuclear chromosome, telomeric region|nuclear chromatin|damaged DNA binding|single-stranded DNA binding|DNA replication factor A complex|DNA-dependent DNA replication|DNA unwinding involved in DNA replication|DNA repair|nucleotide-excision repair|telomere maintenance via telomerase|male meiotic nuclear division|male meios…
Cse_sc001401.1_g010.1	12.9103	27.2654	2.11192	0.0446187	Up	REM1.4	Remorin 1.4	GO:0009651,GO:0010555	response to salt stress|response to mannitol
Cse_sc001402.1_g040.1	5076.8	13060	2.57249	5.45156e-05	Up	ERD3	Probable methyltransferase PMT21	GO:0005768,GO:0005789,GO:0005794,GO:0005802,GO:0008757,GO:0016021,GO:0052546	endosome|endoplasmic reticulum membrane|Golgi apparatus|trans-Golgi network|S-adenosylmethionine-dependent methyltransferase activity|integral component of membrane|cell wall pectin metabolic process
Cse_sc001404.1_g020.1	143.778	408.741	2.84286	5.87193e-06	Up
Cse_sc001405.1_g040.1	9.34484	25.1967	2.69632	0.0132723	Up	N	TMV resistance protein N	GO:0005524,GO:0005737,GO:0007165,GO:0009626,GO:0043531	ATP binding|cytoplasm|signal transduction|plant-type hypersensitive response|ADP binding
Cse_sc001410.1_g040.1	42.5041	0.755446	0.0177735	5.23741e-06	Down
Cse_sc001411.1_g010.1	23.057	102.006	4.42408	0.022191	Up
Cse_sc001413.1_g040.1	641.36	1523.37	2.37522	7.28286e-05	Up
Cse_sc001413.1_g050.1	216.258	71.7088	0.331589	6.88098e-05	Down
Cse_sc001413.1_g100.1	112.606	51.8671	0.460608	0.006963	Down	HST	Shikimate O-hydroxycinnamoyltransferase	GO:0047172	shikimate O-hydroxycinnamoyltransferase activity
Cse_sc001414.1_g020.1	29.7486	4.79372	0.161141	3.45727e-05	Down		Non-specific lipid-transfer protein	GO:0006869,GO:0008289	lipid transport|lipid binding
Cse_sc001414.1_g100.1	18.3402	0	0	3.70042e-05	Down	DTX53	Protein DETOXIFICATION 53	GO:0006855,GO:0015238,GO:0015297,GO:0016021	drug transmembrane transport|drug transmembrane transporter activity|antiporter activity|integral component of membrane
Cse_sc001416.1_g010.1	93.92	26.9164	0.286589	0.000317513	Down	RMA2	E3 ubiquitin-protein ligase RMA2	GO:0004842,GO:0005783,GO:0006511,GO:0016021,GO:0036513,GO:0044390,GO:0046872,GO:0061630,GO:0071712	ubiquitin-protein transferase activity|endoplasmic reticulum|ubiquitin-dependent protein catabolic process|integral component of membrane|Derlin-1 retrotranslocation complex|ubiquitin-like protein conjugating enzyme binding|metal ion binding|ubiquitin protein ligase activity|ER-associated misfolded protein catabolic process
Cse_sc001418.1_g010.1	9.37726	2.48582	0.265091	0.0426331	Down
Cse_sc001418.1_g020.1	9.46283	0.321973	0.034025	0.000768329	Down	JMJ25	Lysine-specific demethylase JMJ25	GO:0000785,GO:0000976,GO:0005634,GO:0031490,GO:0032454,GO:0033169,GO:0046872,GO:0051213,GO:0060969	chromatin|transcription regulatory region sequence-specific DNA binding|nucleus|chromatin DNA binding|histone demethylase activity (H3-K9 specific)|histone H3-K9 demethylation|metal ion binding|dioxygenase activity|negative regulation of gene silencing
Cse_sc001418.1_g070.1	445.294	219.201	0.492262	0.00144033	Down	CRTL-E-1	Lycopene epsilon cyclase, chloroplastic	GO:0006744,GO:0016021,GO:0016117,GO:0016705,GO:0016853,GO:0031969	ubiquinone biosynthetic process|integral component of membrane|carotenoid biosynthetic process|oxidoreductase activity, acting on paired donors, with incorporation or reduction of molecular oxygen|isomerase activity|chloroplast membrane
Cse_sc001419.1_g090.1	168.413	67.1317	0.398613	0.000310013	Down	APS1	Acid phosphatase 1	GO:0003993	acid phosphatase activity
Cse_sc001420.1_g020.1	53.6805	25.3768	0.472737	0.0141633	Down	NFYB8	Nuclear transcription factor Y subunit B-8	GO:0003700,GO:0005634,GO:0043565,GO:0046982	DNA-binding transcription factor activity|nucleus|sequence-specific DNA binding|protein heterodimerization activity
Cse_sc001420.1_g050.1	4.67181	0.330986	0.0708476	0.0412472	Down	CPR1	F-box protein CPR1	GO:0005634,GO:0005737,GO:0009626,GO:0016567,GO:0031348,GO:0042177	nucleus|cytoplasm|plant-type hypersensitive response|protein ubiquitination|negative regulation of defense response|negative regulation of protein catabolic process
Cse_sc001425.1_g010.1	102.11	219.914	2.15369	0.00105008	Up
Cse_sc001425.1_g070.1	99.5349	47.9852	0.482094	0.00647707	Down
Cse_sc001430.1_g060.1	70.5995	16.6962	0.236492	5.71012e-06	Down	At2g27500	Glucan endo-1,3-beta-glucosidase 14	GO:0005576,GO:0005618,GO:0005634,GO:0005737,GO:0005975,GO:0006952,GO:0042973,GO:0046658,GO:0071555	extracellular region|cell wall|nucleus|cytoplasm|carbohydrate metabolic process|defense response|glucan endo-1,3-beta-D-glucosidase activity|anchored component of plasma membrane|cell wall organization
Cse_sc001430.1_g080.1	504.919	215.222	0.426251	0.000153916	Down
Cse_sc001430.1_g100.1	392.853	96.2168	0.244918	2.05006e-05	Down	ADS3	Palmitoyl-monogalactosyldiacylglycerol delta-7 desaturase, chloroplastic	GO:0005789,GO:0006636,GO:0009579,GO:0009979,GO:0010205,GO:0016021,GO:0016717,GO:0031408,GO:0031969	endoplasmic reticulum membrane|unsaturated fatty acid biosynthetic process|thylakoid|16:0 monogalactosyldiacylglycerol desaturase activity|photoinhibition|integral component of membrane|oxidoreductase activity, acting on paired donors, with oxidation of a pair of donors resulting in the reduction of molecular oxygen to two molecules of water|oxylipin biosynthetic process|chloroplast membrane
Cse_sc001434.1_g040.1	13.0456	40.2579	3.08594	0.00133491	Up	ABCC3	ABC transporter C family member 3	GO:0000325,GO:0005524,GO:0005773,GO:0005774,GO:0008559,GO:0009506,GO:0010290,GO:0015431,GO:0016020,GO:0016021,GO:0042626,GO:0048046,GO:0055085	plant-type vacuole|ATP binding|vacuole|vacuolar membrane|xenobiotic transmembrane transporting ATPase activity|plasmodesma|chlorophyll catabolite transmembrane transporter activity|glutathione S-conjugate-exporting ATPase activity|membrane|integral component of membrane|ATPase activity, coupled to transmembrane movement of substances|apoplast|transmembrane transport
Cse_sc001435.1_g040.1	317.437	13.6815	0.0430997	9.69112e-28	Down
Cse_sc001436.1_g040.1	456.733	1325.94	2.90309	0.00290209	Up	Os04g0609600	Probable protein phosphatase 2C 44	GO:0004722,GO:0046872	protein serine/threonine phosphatase activity|metal ion binding
Cse_sc001438.1_g070.1	54.1093	20.7128	0.382795	0.00251003	Down	IRX15-L	Protein IRX15-LIKE	GO:0000139,GO:0005794,GO:0009834,GO:0016021,GO:0045491,GO:0045492	Golgi membrane|Golgi apparatus|plant-type secondary cell wall biogenesis|integral component of membrane|xylan metabolic process|xylan biosynthetic process
Cse_sc001439.1_g020.1	8.54916	0	0	0.000519732	Down	RTNLB14	Reticulon-like protein B14	GO:0005789,GO:0016021	endoplasmic reticulum membrane|integral component of membrane
Cse_sc001439.1_g050.1	140.198	701.535	5.00389	2.93078e-05	Up
Cse_sc001440.1_g010.1	12.9014	39.1824	3.03707	0.00151372	Up
Cse_sc001440.1_g030.1	543.265	4564.96	8.40282	1.43605e-20	Up	ASD1	Alpha-L-arabinofuranosidase 1	GO:0005773,GO:0009044,GO:0009505,GO:0045493,GO:0046373,GO:0046556,GO:0048046	vacuole|xylan 1,4-beta-xylosidase activity|plant-type cell wall|xylan catabolic process|L-arabinose metabolic process|alpha-L-arabinofuranosidase activity|apoplast
Cse_sc001445.1_g070.1	0.338115	15.2932	45.2306	0.00469266	Up	RGLG2	E3 ubiquitin-protein ligase RGLG2	GO:0004842,GO:0005634,GO:0005886,GO:0009690,GO:0009738,GO:0009850,GO:0046872,GO:0080148	ubiquitin-protein transferase activity|nucleus|plasma membrane|cytokinin metabolic process|abscisic acid-activated signaling pathway|auxin metabolic process|metal ion binding|negative regulation of response to water deprivation
Cse_sc001455.1_g030.1	6061.99	474.207	0.0782263	1.07342e-14	Down
Cse_sc001457.1_g010.1	14.3795	81.3991	5.66077	0.000662279	Up	GAT1	GABA transporter 1	GO:0003333,GO:0005886,GO:0015171,GO:0015185,GO:0015812,GO:0016021	amino acid transmembrane transport|plasma membrane|amino acid transmembrane transporter activity|gamma-aminobutyric acid transmembrane transporter activity|gamma-aminobutyric acid transport|integral component of membrane
Cse_sc001457.1_g090.1	85.2815	393.988	4.61985	1.63367e-10	Up	NAC022	NAC domain-containing protein 22	GO:0005634,GO:0043565,GO:0045893,GO:1901002,GO:1902584	nucleus|sequence-specific DNA binding|positive regulation of transcription, DNA-templated|positive regulation of response to salt stress|positive regulation of response to water deprivation
Cse_sc001458.1_g030.1	51.9644	25.7635	0.495792	0.026997	Down	MEL1	Protein argonaute MEL1	GO:0005730,GO:0005731,GO:0007140,GO:0007143,GO:0009561,GO:0031047,GO:0033169,GO:0035197,GO:0055046	nucleolus|nucleolus organizer region|male meiotic nuclear division|female meiotic nuclear division|megagametogenesis|gene silencing by RNA|histone H3-K9 demethylation|siRNA binding|microgametogenesis
Cse_sc001460.1_g070.1	25.3986	7.04752	0.277477	0.00322897	Down
Cse_sc001462.1_g040.1	287.456	8.16267	0.0283962	4.46592e-08	Down	PLDDELTA	Phospholipase D delta	GO:0004630,GO:0005509,GO:0005773,GO:0005886,GO:0009409,GO:0009506,GO:0009789,GO:0012501,GO:0016020,GO:0016042,GO:0046470,GO:0046473,GO:0070290,GO:0090333	phospholipase D activity|calcium ion binding|vacuole|plasma membrane|response to cold|plasmodesma|positive regulation of abscisic acid-activated signaling pathway|programmed cell death|membrane|lipid catabolic process|phosphatidylcholine metabolic process|phosphatidic acid metabolic process|N-acylphosphatidylethanolamine-specific phospholipase D activity|regulation of stomatal closure
Cse_sc001465.1_g080.1	5.00127	15.3791	3.07504	0.0436057	Up	SPL2	Squamosa promoter-binding-like protein 2	GO:0003700,GO:0005634,GO:0006355,GO:0043565,GO:0044212,GO:0046872,GO:0048510,GO:0048653	DNA-binding transcription factor activity|nucleus|regulation of transcription, DNA-templated|sequence-specific DNA binding|transcription regulatory region DNA binding|metal ion binding|regulation of timing of transition from vegetative to reproductive phase|anther development
Cse_sc001467.1_g080.1	6.18456	0.330986	0.0535182	0.0112106	Down
Cse_sc001468.1_g030.1	5.4759	0	0	0.00996973	Down	EC1.4	Egg cell-secreted protein 1.4	GO:0005576,GO:0007338,GO:0009567,GO:0031410,GO:0031982,GO:0080155,GO:2000008	extracellular region|single fertilization|double fertilization forming a zygote and endosperm|cytoplasmic vesicle|vesicle|regulation of double fertilization forming a zygote and endosperm|regulation of protein localization to cell surface
Cse_sc001469.1_g010.1	2.5088	24.8208	9.89351	7.66701e-06	Up	NFD4	Protein NUCLEAR FUSION DEFECTIVE 4	GO:0000741,GO:0005739,GO:0009651,GO:0010197,GO:0016021	karyogamy|mitochondrion|response to salt stress|polar nucleus fusion|integral component of membrane
Cse_sc001470.1_g080.1	647.775	48.9964	0.075638	4.70997e-20	Down	SYP125	Syntaxin-125	GO:0000149,GO:0005484,GO:0005886,GO:0006886,GO:0006887,GO:0006906,GO:0012505,GO:0016021,GO:0031201,GO:0048278	SNARE binding|SNAP receptor activity|plasma membrane|intracellular protein transport|exocytosis|vesicle fusion|endomembrane system|integral component of membrane|SNARE complex|vesicle docking
Cse_sc001474.1_g010.1	15.9264	44.4344	2.78999	0.00222256	Up	At4g27190	Disease resistance protein At4g27190
Cse_sc001474.1_g020.1	130.151	279.827	2.15001	0.0071888	Up	At4g27190	Disease resistance protein At4g27190
Cse_sc001476.1_g040.1	14.0251	4.35123	0.310247	0.0310701	Down	POL2A	DNA polymerase epsilon catalytic subunit A	GO:0000166,GO:0000278,GO:0003677,GO:0003887,GO:0006272,GO:0006287,GO:0006297,GO:0008270,GO:0008310,GO:0008622,GO:0010086,GO:0045004,GO:0048046,GO:0048579,GO:0051302,GO:0051539	nucleotide binding|mitotic cell cycle|DNA binding|DNA-directed DNA polymerase activity|leading strand elongation|base-excision repair, gap-filling|nucleotide-excision repair, DNA gap filling|zinc ion binding|single-stranded DNA 3'-5' exodeoxyribonuclease activity|epsilon DNA polymerase complex|embryonic root morphogenesis|DNA replication proofreading|apoplast|negative regulation of long-day photo…
Cse_sc001479.1_g080.1	26.1161	2.83484	0.108547	6.70768e-06	Down
Cse_sc001481.1_g020.1	13.6535	4.70543	0.34463	0.0388155	Down	FER	Receptor-like protein kinase FERONIA
Cse_sc001482.1_g030.1	28.8789	386.466	13.3823	2.63629e-08	Up	YUC8	Probable indole-3-pyruvate monooxygenase YUCCA8	GO:0004499,GO:0009735,GO:0009742,GO:0009851,GO:0010600,GO:0050660,GO:0050661,GO:0103075	N,N-dimethylaniline monooxygenase activity|response to cytokinin|brassinosteroid mediated signaling pathway|auxin biosynthetic process|regulation of auxin biosynthetic process|flavin adenine dinucleotide binding|NADP binding|indole-3-pyruvate monooxygenase activity
Cse_sc001487.1_g030.1	2583.99	203.401	0.0787159	8.46187e-27	Down	VTE4	Probable tocopherol O-methyltransferase, chloroplastic	GO:0009507,GO:0010189,GO:0050342	chloroplast|vitamin E biosynthetic process|tocopherol O-methyltransferase activity
Cse_sc001488.1_g030.1	45.0732	96.3171	2.1369	0.00529166	Up
Cse_sc001488.1_g050.1	1125.09	461.997	0.410633	0.00564125	Down	HSF30	Heat shock factor protein HSF30	GO:0003700,GO:0005634,GO:0043565	DNA-binding transcription factor activity|nucleus|sequence-specific DNA binding
Cse_sc001488.1_g080.1	94.9895	47.345	0.498423	0.0321267	Down	HSF30	Heat shock factor protein HSF30	GO:0003700,GO:0005634,GO:0043565	DNA-binding transcription factor activity|nucleus|sequence-specific DNA binding
Cse_sc001489.1_g030.1	10.8737	0	0	3.83665e-05	Down
Cse_sc001492.1_g010.1	7.41903	1.51089	0.203651	0.040831	Down
Cse_sc001494.1_g030.1	234.066	57.7567	0.246754	2.97067e-06	Down	PAO1	Polyamine oxidase 1	GO:0006598,GO:0016491,GO:0046208,GO:0046592,GO:0050660,GO:0052894,GO:0052895,GO:0052901	polyamine catabolic process|oxidoreductase activity|spermine catabolic process|polyamine oxidase activity|flavin adenine dinucleotide binding|norspermine:oxygen oxidoreductase activity|N1-acetylspermine:oxygen oxidoreductase (N1-acetylspermidine-forming) activity|spermine:oxygen oxidoreductase (spermidine-forming) activity
Cse_sc001498.1_g030.1	1954.65	50.1649	0.0256643	7.41057e-37	Down	PME6	Probable pectinesterase/pectinesterase inhibitor 6	GO:0005576,GO:0005618,GO:0030599,GO:0042545,GO:0045330,GO:0045490,GO:0046910	extracellular region|cell wall|pectinesterase activity|cell wall modification|aspartyl esterase activity|pectin catabolic process|pectinesterase inhibitor activity
Cse_sc001499.1_g040.1	10.9748	23.5546	2.14624	0.0486901	Up	PGL1	Probable 6-phosphogluconolactonase 1	GO:0005829,GO:0005975,GO:0009051,GO:0017057	cytosol|carbohydrate metabolic process|pentose-phosphate shunt, oxidative branch|6-phosphogluconolactonase activity
Cse_sc001499.1_g080.1	14.7253	35.5182	2.41205	0.014194	Up	Os07g0604000	Probable 6-phosphogluconolactonase 2	GO:0005975,GO:0009051,GO:0017057	carbohydrate metabolic process|pentose-phosphate shunt, oxidative branch|6-phosphogluconolactonase activity
Cse_sc001506.1_g010.1	56.0243	0.330986	0.00590791	3.0479e-17	Down	MSL8	Mechanosensitive ion channel protein 8	GO:0005886,GO:0006820,GO:0008381,GO:0012505,GO:0016021	plasma membrane|anion transport|mechanosensitive ion channel activity|endomembrane system|integral component of membrane
Cse_sc001506.1_g090.1	1.29286	7.27053	5.62361	0.0366141	Up	At5g16590	Probable inactive receptor kinase At5g16590
Cse_sc001506.1_g100.1	262.702	20.2037	0.0769072	1.46663e-05	Down	PEX1	Pollen-specific leucine-rich repeat extensin-like protein 1	GO:0005199,GO:0005576,GO:0005618,GO:0009860,GO:0071555	structural constituent of cell wall|extracellular region|cell wall|pollen tube growth|cell wall organization
Cse_sc001506.1_g110.1	17.5136	186.39	10.6426	1.46479e-16	Up	MEE14	CCG-binding protein 1	GO:0005634,GO:0005829,GO:0009507,GO:0009793,GO:0010183,GO:0036033,GO:0050832	nucleus|cytosol|chloroplast|embryo development ending in seed dormancy|pollen tube guidance|mediator complex binding|defense response to fungus
Cse_sc001513.1_g050.1	43.4934	21.1551	0.486397	0.0287756	Down
Cse_sc001514.1_g020.1	16.7763	0.652959	0.0389215	0.0264764	Down	XI-E	Myosin-11	GO:0000146,GO:0003774,GO:0003779,GO:0005516,GO:0005524,GO:0005737,GO:0007015,GO:0009860,GO:0016459,GO:0030048,GO:0051640	microfilament motor activity|motor activity|actin binding|calmodulin binding|ATP binding|cytoplasm|actin filament organization|pollen tube growth|myosin complex|actin filament-based movement|organelle localization
Cse_sc001516.1_g080.1	6.32009	0	0	0.00279031	Down	MTO1	Mitochondrial translation optimization protein 1	GO:0002098,GO:0005739,GO:0005759,GO:0006400,GO:0016740,GO:0030488,GO:0050660,GO:0070899	tRNA wobble uridine modification|mitochondrion|mitochondrial matrix|tRNA modification|transferase activity|tRNA methylation|flavin adenine dinucleotide binding|mitochondrial tRNA wobble uridine modification
Cse_sc001516.1_g090.1	0	3.90324	Inf	0.0277869	Up	TOM20	Mitochondrial import receptor subunit TOM20	GO:0005742,GO:0016021,GO:0045040	mitochondrial outer membrane translocase complex|integral component of membrane|protein import into mitochondrial outer membrane
Cse_sc001519.1_g040.1	39.7207	254.941	6.41835	1.80219e-13	Up	XTH33	Probable xyloglucan endotransglucosylase/hydrolase protein 33	GO:0004553,GO:0005618,GO:0005887,GO:0009831,GO:0010411,GO:0016762,GO:0042546,GO:0048046	hydrolase activity, hydrolyzing O-glycosyl compounds|cell wall|integral component of plasma membrane|plant-type cell wall modification involved in multidimensional cell growth|xyloglucan metabolic process|xyloglucan:xyloglucosyl transferase activity|cell wall biogenesis|apoplast
Cse_sc001525.1_g050.1	10.9419	0.755446	0.0690414	0.00335961	Down	AGL80	Agamous-like MADS-box protein AGL80	GO:0000982,GO:0000987,GO:0003700,GO:0005634,GO:0007275,GO:0008134,GO:0043078,GO:0043565,GO:0044212,GO:0045944,GO:0046983	transcription factor activity, RNA polymerase II proximal promoter sequence-specific DNA binding|proximal promoter sequence-specific DNA binding|DNA-binding transcription factor activity|nucleus|multicellular organism development|transcription factor binding|polar nucleus|sequence-specific DNA binding|transcription regulatory region DNA binding|positive regulation of transcription by RNA polymera…
Cse_sc001534.1_g040.1	16489.7	33955.9	2.05922	0.000582209	Up		Phytepsin	GO:0004190,GO:0005773,GO:0006629	aspartic-type endopeptidase activity|vacuole|lipid metabolic process
Cse_sc001536.1_g070.1	234.561	845.498	3.6046	1.51195e-08	Up	ATJ6	Chaperone protein dnaJ 6	GO:0005634	nucleus
Cse_sc001537.1_g040.1	14.7253	34	2.30895	0.02018	Up	PXC1	Leucine-rich repeat receptor-like protein kinase PXC1
Cse_sc001537.1_g050.1	305.829	76.243	0.249299	0.00014193	Down	ABCG28	ABC transporter G family member 28	GO:0005524,GO:0005886,GO:0016021,GO:0042626,GO:0055085	ATP binding|plasma membrane|integral component of membrane|ATPase activity, coupled to transmembrane movement of substances|transmembrane transport
Cse_sc001542.1_g030.1	688.614	26.7024	0.038777	8.32744e-13	Down	PBL26	Probable serine/threonine-protein kinase PBL26
Cse_sc001542.1_g040.1	170.983	74.1787	0.433837	0.000746554	Down
Cse_sc001543.1_g030.1	5125.42	2550.11	0.497541	0.00109553	Down	PIP2-5	Probable aquaporin PIP2-5	GO:0005773,GO:0005886,GO:0006833,GO:0009414,GO:0009506,GO:0015250,GO:0016021	vacuole|plasma membrane|water transport|response to water deprivation|plasmodesma|water channel activity|integral component of membrane
Cse_sc001550.1_g010.1	4775.82	10008.9	2.09574	0.00165964	Up	NHL3	NDR1/HIN1-like protein 3	GO:0005774,GO:0005794,GO:0005886,GO:0009506,GO:0009611,GO:0009617,GO:0009751,GO:0009816,GO:0016021,GO:0042742,GO:0046658,GO:0051607	vacuolar membrane|Golgi apparatus|plasma membrane|plasmodesma|response to wounding|response to bacterium|response to salicylic acid|defense response to bacterium, incompatible interaction|integral component of membrane|defense response to bacterium|anchored component of plasma membrane|defense response to virus
Cse_sc001552.1_g040.1	13.6028	43.7584	3.21686	0.011613	Up	PNC1	Cationic peroxidase 1	GO:0004601,GO:0005576,GO:0006979,GO:0020037,GO:0042744,GO:0046872	peroxidase activity|extracellular region|response to oxidative stress|heme binding|hydrogen peroxide catabolic process|metal ion binding
Cse_sc001552.1_g070.1	36.8978	9.06567	0.245697	0.000202475	Down	BZIP11	bZIP transcription factor 11	GO:0003700,GO:0005634,GO:0009744,GO:0017148,GO:0043565,GO:0044212,GO:0045893,GO:0046982,GO:0080149	DNA-binding transcription factor activity|nucleus|response to sucrose|negative regulation of translation|sequence-specific DNA binding|transcription regulatory region DNA binding|positive regulation of transcription, DNA-templated|protein heterodimerization activity|sucrose induced translational repression
Cse_sc001553.1_g050.1	181.159	27.5029	0.151817	2.21263e-05	Down	CHX2	Cation/H(+) antiporter 2	GO:0006813,GO:0006885,GO:0012505,GO:0015299,GO:0016021	potassium ion transport|regulation of pH|endomembrane system|solute:proton antiporter activity|integral component of membrane
Cse_sc001554.1_g020.1	34.3185	14.739	0.429476	0.0206601	Down	DRM2	DNA (cytosine-5)-methyltransferase DRM2	GO:0003677,GO:0003886,GO:0005634	DNA binding|DNA (cytosine-5-)-methyltransferase activity|nucleus
Cse_sc001555.1_g030.1	8.58378	0.321973	0.0375094	0.00855105	Down
Cse_sc001555.1_g050.1	401.666	1319.44	3.28492	9.18602e-07	Up	At4g39670	ACD11 homolog protein	GO:0005634,GO:0005737,GO:0005829,GO:0008289,GO:0016020,GO:0035627,GO:0120009,GO:0120013,GO:1902387,GO:1902388	nucleus|cytoplasm|cytosol|lipid binding|membrane|ceramide transport|intermembrane lipid transfer|intermembrane lipid transfer activity|ceramide 1-phosphate binding|ceramide 1-phosphate transporter activity
Cse_sc001555.1_g070.1	3243.09	7368.04	2.27192	9.87133e-05	Up	NPF3.1	Protein NRT1/ PTR FAMILY 3.1	GO:0005886,GO:0010336,GO:0015333,GO:0016021,GO:0035673,GO:0042128,GO:0097708,GO:1904680	plasma membrane|gibberellic acid homeostasis|peptide:proton symporter activity|integral component of membrane|oligopeptide transmembrane transporter activity|nitrate assimilation|intracellular vesicle|peptide transmembrane transporter activity
Cse_sc001556.1_g020.1	153.081	415.197	2.71227	1.11325e-05	Up	ZAT6	Zinc finger protein ZAT6	GO:0000978,GO:0003700,GO:0005634,GO:0010200,GO:0044212,GO:0046872,GO:0055062,GO:2000280	RNA polymerase II proximal promoter sequence-specific DNA binding|DNA-binding transcription factor activity|nucleus|response to chitin|transcription regulatory region DNA binding|metal ion binding|phosphate ion homeostasis|regulation of root development
Cse_sc001556.1_g030.1	6.08266	0.321973	0.0529329	0.0208488	Down
Cse_sc001557.1_g020.1	116.765	2008.56	17.2018	1.23085e-22	Up
Cse_sc001560.1_g040.1	95.4571	268.036	2.80792	0.0308549	Up		Cytochrome P450 CYP72A219	GO:0004497,GO:0005506,GO:0016021,GO:0016705,GO:0020037	monooxygenase activity|iron ion binding|integral component of membrane|oxidoreductase activity, acting on paired donors, with incorporation or reduction of molecular oxygen|heme binding
Cse_sc001566.1_g050.1	57.8129	23.7815	0.411352	0.00427122	Down	KIN14C	Kinesin-like protein KIN-14C	GO:0000777,GO:0003777,GO:0005524,GO:0005634,GO:0005737,GO:0005819,GO:0005871,GO:0005872,GO:0005874,GO:0007018,GO:0008017,GO:0008569,GO:0009524,GO:0009971,GO:0016887,GO:0051225,GO:0051301	condensed chromosome kinetochore|microtubule motor activity|ATP binding|nucleus|cytoplasm|spindle|kinesin complex|minus-end kinesin complex|microtubule|microtubule-based movement|microtubule binding|ATP-dependent microtubule motor activity, minus-end-directed|phragmoplast|anastral spindle assembly involved in male meiosis|ATPase activity|spindle assembly|cell division
Cse_sc001572.1_g030.1	25.4651	7.19125	0.282396	0.00966889	Down	At1g27930	Probable methyltransferase At1g27930	GO:0000139,GO:0005768,GO:0005794,GO:0005802,GO:0008168,GO:0009834,GO:0016021,GO:0045491,GO:0045492	Golgi membrane|endosome|Golgi apparatus|trans-Golgi network|methyltransferase activity|plant-type secondary cell wall biogenesis|integral component of membrane|xylan metabolic process|xylan biosynthetic process
Cse_sc001573.1_g070.1	222.816	9.90558	0.0444563	5.73577e-11	Down	PAT07	Probable protein S-acyltransferase 7	GO:0005783,GO:0005794,GO:0005886,GO:0006612,GO:0016021,GO:0018230,GO:0019706	endoplasmic reticulum|Golgi apparatus|plasma membrane|protein targeting to membrane|integral component of membrane|peptidyl-L-cysteine S-palmitoylation|protein-cysteine S-palmitoyltransferase activity
Cse_sc001578.1_g060.1	15.7743	2.04334	0.129536	0.000657327	Down
Cse_sc001578.1_g080.1	243.57	27.7633	0.113985	0.000307482	Down	BGAL16	Beta-galactosidase 16	GO:0004565,GO:0005618,GO:0005773,GO:0005975,GO:0030246,GO:0048046	beta-galactosidase activity|cell wall|vacuole|carbohydrate metabolic process|carbohydrate binding|apoplast
Cse_sc001578.1_g120.1	156.053	15.2189	0.0975236	7.52539e-08	Down	BGAL6	Beta-galactosidase 6	GO:0004565,GO:0005618,GO:0005773,GO:0005975,GO:0009827,GO:0048046,GO:0048354	beta-galactosidase activity|cell wall|vacuole|carbohydrate metabolic process|plant-type cell wall modification|apoplast|mucilage biosynthetic process involved in seed coat development
Cse_sc001582.1_g030.1	2.2476	13.6129	6.05662	0.00336097	Up	LAX1	Auxin transporter-like protein 1	GO:0003333,GO:0005886,GO:0009734,GO:0010328,GO:0015171,GO:0015293,GO:0016021,GO:0048829	amino acid transmembrane transport|plasma membrane|auxin-activated signaling pathway|auxin influx transmembrane transporter activity|amino acid transmembrane transporter activity|symporter activity|integral component of membrane|root cap development
Cse_sc001583.1_g020.1	302.835	1090.54	3.60112	3.41058e-08	Up	LOX1.5	Probable linoleate 9S-lipoxygenase 5	GO:0005737,GO:0016702,GO:0031408,GO:0046872	cytoplasm|oxidoreductase activity, acting on single donors with incorporation of molecular oxygen, incorporation of two atoms of oxygen|oxylipin biosynthetic process|metal ion binding
Cse_sc001583.1_g080.1	65.5864	24.5726	0.374661	0.000910184	Down	TSO1	CRC domain-containing protein TSO1	GO:0003700,GO:0005634,GO:0009934,GO:0046872,GO:0048444,GO:0051302	DNA-binding transcription factor activity|nucleus|regulation of meristem structural organization|metal ion binding|floral organ morphogenesis|regulation of cell division
Cse_sc001584.1_g040.1	88.0111	23.3675	0.265507	0.0309258	Down	HHT1	Omega-hydroxypalmitate O-feruloyl transferase	GO:0010345,GO:0050734,GO:0052325,GO:0102406	suberin biosynthetic process|hydroxycinnamoyltransferase activity|cell wall pectin biosynthetic process|omega-hydroxypalmitate O-sinapoyl transferase activity
Cse_sc001584.1_g080.1	6.24318	1.13317	0.181505	0.04732	Down	ATL66	RING-H2 finger protein ATL66	GO:0016021,GO:0016567,GO:0016740,GO:0046872	integral component of membrane|protein ubiquitination|transferase activity|metal ion binding
Cse_sc001586.1_g070.1	699.407	1523.32	2.17801	0.0123126	Up
Cse_sc001586.1_g090.1	12.9088	2.05235	0.158988	0.00322315	Down	CRRSP3	Cysteine-rich repeat secretory protein 3	GO:0009506,GO:0010497,GO:0016021,GO:0046739	plasmodesma|plasmodesmata-mediated intercellular transport|integral component of membrane|transport of virus in multicellular host
Cse_sc001586.1_g100.1	45.0658	97.5426	2.16445	0.00716871	Up
Cse_sc001589.1_g030.1	118.825	13.7137	0.11541	0.00132024	Down	PIRL6	Plant intracellular Ras-group-related LRR protein 6
Cse_sc001589.1_g050.1	5.12048	0	0	0.00914457	Down	At1g65750	Putative ribonuclease H protein At1g65750	GO:0003676,GO:0004523,GO:0046872	nucleic acid binding|RNA-DNA hybrid ribonuclease activity|metal ion binding
Cse_sc001590.1_g010.1	9.29365	2.03265	0.218714	0.0293049	Down
Cse_sc001594.1_g020.1	189.339	78.551	0.41487	0.00031989	Down	BRXL3	Protein Brevis radix-like 3	GO:0005634	nucleus
Cse_sc001594.1_g030.1	97.9525	20.0022	0.204203	1.01161e-07	Down	At1g54200	Protein BIG GRAIN 1-like B	GO:0005886,GO:0009734,GO:0010929,GO:0060918	plasma membrane|auxin-activated signaling pathway|positive regulation of auxin mediated signaling pathway|auxin transport
Cse_sc001595.1_g050.1	14.244	2.91028	0.204317	0.00416349	Down	NPGR2	Protein NPGR2	GO:0005516,GO:0005886	calmodulin binding|plasma membrane
Cse_sc001595.1_g110.1	1518.88	94.3048	0.0620885	5.59692e-11	Down	RIC3	CRIB domain-containing protein RIC3	GO:0005737,GO:0007204,GO:0009860,GO:0017157,GO:0030834,GO:0040008,GO:0050848,GO:0050850,GO:0051650	cytoplasm|positive regulation of cytosolic calcium ion concentration|pollen tube growth|regulation of exocytosis|regulation of actin filament depolymerization|regulation of growth|regulation of calcium-mediated signaling|positive regulation of calcium-mediated signaling|establishment of vesicle localization
Cse_sc001596.1_g030.1	521.776	14.7425	0.0282545	1.16585e-08	Down	PME28	Putative pectinesterase/pectinesterase inhibitor 28	GO:0005618,GO:0016021,GO:0030599,GO:0042545,GO:0045330,GO:0045490,GO:0046910	cell wall|integral component of membrane|pectinesterase activity|cell wall modification|aspartyl esterase activity|pectin catabolic process|pectinesterase inhibitor activity
Cse_sc001597.1_g010.1	14.2378	50.6441	3.55703	0.000125443	Up	N	TMV resistance protein N	GO:0005524,GO:0005737,GO:0007165,GO:0009626,GO:0043531	ATP binding|cytoplasm|signal transduction|plant-type hypersensitive response|ADP binding
Cse_sc001598.1_g020.1	1245.04	3009.15	2.4169	4.71278e-05	Up	ATG4	Cysteine protease ATG4	GO:0005737,GO:0006914,GO:0008234,GO:0015031	cytoplasm|autophagy|cysteine-type peptidase activity|protein transport
Cse_sc001600.1_g070.1	115.575	4.45372	0.0385353	2.75852e-08	Down	LOX2.1	Linoleate 13S-lipoxygenase 2-1, chloroplastic	GO:0009534,GO:0009570,GO:0010597,GO:0016165,GO:0031408,GO:0046872	chloroplast thylakoid|chloroplast stroma|green leaf volatile biosynthetic process|linoleate 13S-lipoxygenase activity|oxylipin biosynthetic process|metal ion binding
Cse_sc001605.1_g010.1	5.90628	0.699696	0.118466	0.0384637	Down	LFG4	Protein LIFEGUARD 4	GO:0016021	integral component of membrane
Cse_sc001609.1_g020.1	44.4893	5.96461	0.134068	0.00538212	Down	At5g34940	Heparanase-like protein 3	GO:0004566,GO:0005576,GO:0005765,GO:0009505	beta-glucuronidase activity|extracellular region|lysosomal membrane|plant-type cell wall
Cse_sc001609.1_g030.1	1.76529	8.78142	4.97449	0.0382527	Up	MEKK1	Mitogen-activated protein kinase kinase kinase 1	GO:0000165,GO:0003677,GO:0004674,GO:0004709,GO:0005524,GO:0005634,GO:0005737,GO:0005768,GO:0005886,GO:0006970,GO:0009409,GO:0009611,GO:0009631,GO:0009651,GO:0010449,GO:0019900,GO:0022622,GO:0023014,GO:0031098,GO:0032147,GO:0045087,GO:0046777,GO:1902065	MAPK cascade|DNA binding|protein serine/threonine kinase activity|MAP kinase kinase kinase activity|ATP binding|nucleus|cytoplasm|endosome|plasma membrane|response to osmotic stress|response to cold|response to wounding|cold acclimation|response to salt stress|root meristem growth|kinase binding|root system development|signal transduction by protein phosphorylation|stress-activated protein kinase…
Cse_sc001609.1_g050.1	70.8936	169.789	2.39498	0.00042402	Up	BBX32	B-box zinc finger protein 32	GO:0003700,GO:0005634,GO:0005737,GO:0006355,GO:0008270,GO:0009640,GO:0009785,GO:0009909,GO:0010017,GO:0010200,GO:0045892	DNA-binding transcription factor activity|nucleus|cytoplasm|regulation of transcription, DNA-templated|zinc ion binding|photomorphogenesis|blue light signaling pathway|regulation of flower development|red or far-red light signaling pathway|response to chitin|negative regulation of transcription, DNA-templated
Cse_sc001614.1_g080.1	1426.83	274.414	0.192324	3.47769e-13	Down	KAS2	3-oxoacyl-[acyl-carrier-protein] synthase II, chloroplastic	GO:0004315,GO:0006633,GO:0006636,GO:0009507,GO:0009536,GO:0009570,GO:0009631,GO:0009793	3-oxoacyl-[acyl-carrier-protein] synthase activity|fatty acid biosynthetic process|unsaturated fatty acid biosynthetic process|chloroplast|plastid|chloroplast stroma|cold acclimation|embryo development ending in seed dormancy
Cse_sc001614.1_g160.1	1033.98	104.415	0.100984	7.83615e-22	Down	At1g54070	Dormancy-associated protein homolog 4
Cse_sc001615.1_g080.1	642.65	77.5373	0.120653	3.07385e-18	Down	At5g35200	Putative clathrin assembly protein At5g35200	GO:0005545,GO:0005794,GO:0005886,GO:0005905,GO:0006897,GO:0030136,GO:0030276,GO:0048268	1-phosphatidylinositol binding|Golgi apparatus|plasma membrane|clathrin-coated pit|endocytosis|clathrin-coated vesicle|clathrin binding|clathrin coat assembly
Cse_sc001617.1_g070.1	344.431	977.041	2.83668	2.49226e-05	Up	RHA1B	E3 ubiquitin-protein ligase RHA1B	GO:0004842,GO:0010200,GO:0016567,GO:0046686,GO:0046872	ubiquitin-protein transferase activity|response to chitin|protein ubiquitination|response to cadmium ion|metal ion binding
Cse_sc001617.1_g080.1	574.839	42.3252	0.0736297	1.14541e-09	Down
Cse_sc001621.1_g070.1	45.2422	15.2785	0.337704	0.00112495	Down	PANC	Pantoate--beta-alanine ligase	GO:0004592,GO:0005524,GO:0005737,GO:0015940	pantoate-beta-alanine ligase activity|ATP binding|cytoplasm|pantothenate biosynthetic process
Cse_sc001623.1_g040.1	42.0925	18.1404	0.430964	0.025904	Down	psbB	Photosystem II CP47 reaction center protein	GO:0009523,GO:0009535,GO:0009772,GO:0016021,GO:0016168,GO:0018298,GO:0045156	photosystem II|chloroplast thylakoid membrane|photosynthetic electron transport in photosystem II|integral component of membrane|chlorophyll binding|protein-chromophore linkage|electron transporter, transferring electrons within the cyclic electron transport pathway of photosynthesis activity
Cse_sc001627.1_g010.1	156.626	349.431	2.231	0.0160549	Up	ATR3	NADPH-dependent diflavin oxidoreductase 1	GO:0003958,GO:0005634,GO:0005737,GO:0005829,GO:0009793,GO:0010181,GO:0016226,GO:0016491,GO:0016651,GO:0050660,GO:0050661	NADPH-hemoprotein reductase activity|nucleus|cytoplasm|cytosol|embryo development ending in seed dormancy|FMN binding|iron-sulfur cluster assembly|oxidoreductase activity|oxidoreductase activity, acting on NAD(P)H|flavin adenine dinucleotide binding|NADP binding
Cse_sc001633.1_g100.1	35.2901	0.755446	0.0214067	2.47924e-06	Down	CAR10	Protein C2-DOMAIN ABA-RELATED 10	GO:0005096,GO:0005543,GO:0005634,GO:0005773,GO:0005886,GO:0009738,GO:0009789,GO:0043547,GO:0046872	GTPase activator activity|phospholipid binding|nucleus|vacuole|plasma membrane|abscisic acid-activated signaling pathway|positive regulation of abscisic acid-activated signaling pathway|positive regulation of GTPase activity|metal ion binding
Cse_sc001634.1_g060.1	181.181	73.1905	0.403963	0.00013382	Down		Miraculin
Cse_sc001635.1_g050.1	88.3495	15.0358	0.170185	1.05469e-08	Down	CYP86B1	Cytochrome P450 86B1	GO:0004497,GO:0005506,GO:0005783,GO:0005789,GO:0010345,GO:0016021,GO:0016705,GO:0020037,GO:0042761,GO:0071555	monooxygenase activity|iron ion binding|endoplasmic reticulum|endoplasmic reticulum membrane|suberin biosynthetic process|integral component of membrane|oxidoreductase activity, acting on paired donors, with incorporation or reduction of molecular oxygen|heme binding|very long-chain fatty acid biosynthetic process|cell wall organization
Cse_sc001636.1_g040.1	581.383	206.065	0.354439	3.40021e-06	Down
Cse_sc001639.1_g060.1	18.8598	7.01332	0.371865	0.0327613	Down		Secoisolariciresinol dehydrogenase (Fragment)	GO:0009807,GO:0102911	lignan biosynthetic process|(-)-secoisolariciresinol dehydrogenase activity
Cse_sc001639.1_g080.1	65.5799	4.6677	0.0711759	1.75808e-06	Down	At1g69160	Protein BIG GRAIN 1-like E	GO:0005886,GO:0009734,GO:0010929,GO:0060918	plasma membrane|auxin-activated signaling pathway|positive regulation of auxin mediated signaling pathway|auxin transport
Cse_sc001642.1_g030.1	627.968	96.0836	0.153007	4.69845e-15	Down	At1g64390	Endoglucanase 6	GO:0005576,GO:0008810,GO:0030245,GO:0030246,GO:0071555	extracellular region|cellulase activity|cellulose catabolic process|carbohydrate binding|cell wall organization
Cse_sc001642.1_g080.1	1395.65	214.637	0.15379	1.11272e-09	Down	LACS4	Long chain acyl-CoA synthetase 4	GO:0004467,GO:0005524,GO:0005794,GO:0005886,GO:0006631,GO:0102391	long-chain fatty acid-CoA ligase activity|ATP binding|Golgi apparatus|plasma membrane|fatty acid metabolic process|decanoate-CoA ligase activity
Cse_sc001643.1_g010.1	50.2238	4.07599	0.0811566	0.000195239	Down	CESA1	Probable cellulose synthase A catalytic subunit 1 [UDP-forming]	GO:0005886,GO:0016021,GO:0016760,GO:0030244,GO:0046872,GO:0071555	plasma membrane|integral component of membrane|cellulose synthase (UDP-forming) activity|cellulose biosynthetic process|metal ion binding|cell wall organization
Cse_sc001648.1_g070.1	0	5.85311	Inf	0.00366349	Up	At3g47110	Putative receptor-like protein kinase At3g47110	GO:0004674,GO:0005524,GO:0005886,GO:0016021	protein serine/threonine kinase activity|ATP binding|plasma membrane|integral component of membrane
Cse_sc001650.1_g070.1	12.7344	1.46416	0.114976	0.0250163	Down
Cse_sc001651.1_g010.1	24.081	7.43778	0.308865	0.00562663	Down	NPR4	Ankyrin repeat-containing protein NPR4	GO:0005886,GO:0016020,GO:0016021	plasma membrane|membrane|integral component of membrane
Cse_sc001653.1_g080.1	9.11606	1.93184	0.211916	0.0349116	Down	ABCB15	ABC transporter B family member 15	GO:0005524,GO:0005886,GO:0016021,GO:0042626	ATP binding|plasma membrane|integral component of membrane|ATPase activity, coupled to transmembrane movement of substances
Cse_sc001656.1_g030.1	1423.93	344.419	0.24188	1.4076e-10	Down	TOR1L3	TORTIFOLIA1-like protein 3	GO:0005874,GO:0008017	microtubule|microtubule binding
Cse_sc001658.1_g060.1	9.46283	2.40136	0.253768	0.042627	Down	FPF1	Flowering-promoting factor 1	GO:0009909	regulation of flower development
Cse_sc001660.1_g030.1	92.0189	209.798	2.27995	0.000405896	Up	RGA3	Putative disease resistance protein RGA3	GO:0005524,GO:0006952,GO:0043531	ATP binding|defense response|ADP binding
Cse_sc001664.1_g060.1	102.953	3.80076	0.0369173	3.22046e-07	Down	ABC1K8	Protein ACTIVITY OF BC1 COMPLEX KINASE 8, chloroplastic	GO:0005215,GO:0005524,GO:0006979,GO:0007623,GO:0009507,GO:0009644,GO:0009941,GO:0010150,GO:0016021,GO:0016301,GO:0031969,GO:0034599,GO:0042542,GO:0046467,GO:0046686,GO:0055072,GO:1901031,GO:1990641	transporter activity|ATP binding|response to oxidative stress|circadian rhythm|chloroplast|response to high light intensity|chloroplast envelope|leaf senescence|integral component of membrane|kinase activity|chloroplast membrane|cellular response to oxidative stress|response to hydrogen peroxide|membrane lipid biosynthetic process|response to cadmium ion|iron ion homeostasis|regulation of respons…
Cse_sc001669.1_g010.1	127.009	268.298	2.11243	0.00154027	Up	VPS37-1	Vacuolar protein-sorting-associated protein 37 homolog 1	GO:0000813,GO:0015031,GO:0032509	ESCRT I complex|protein transport|endosome transport via multivesicular body sorting pathway
Cse_sc001676.1_g060.1	294.451	11.5158	0.0391092	1.04528e-12	Down	ANP2	Mitogen-activated protein kinase kinase kinase 2	GO:0004709,GO:0005524,GO:0005737,GO:0005874,GO:0043622	MAP kinase kinase kinase activity|ATP binding|cytoplasm|microtubule|cortical microtubule organization
Cse_sc001677.1_g030.1	4.30006	221.307	51.4662	2.69033e-31	Up	IPMSA	2-isopropylmalate synthase A	GO:0003852,GO:0009098	2-isopropylmalate synthase activity|leucine biosynthetic process
Cse_sc001678.1_g070.1	15.9333	0.755446	0.047413	0.000730243	Down	TRS120	Trafficking protein particle complex II-specific subunit 120 homolog	GO:0000911,GO:0000919,GO:0005769,GO:0005802	cytokinesis by cell plate formation|cell plate assembly|early endosome|trans-Golgi network
Cse_sc001679.1_g030.1	102.178	35.2066	0.34456	7.713e-05	Down
Cse_sc001686.1_g030.1	6.13262	0	0	0.00513402	Down	At1g65750	Putative ribonuclease H protein At1g65750	GO:0003676,GO:0004523,GO:0046872	nucleic acid binding|RNA-DNA hybrid ribonuclease activity|metal ion binding
Cse_sc001686.1_g040.1	5.71212	0	0	0.00505432	Down
Cse_sc001687.1_g020.1	347.598	45.422	0.130674	0.00013725	Down	LHY	Protein LHY	GO:0003700,GO:0005634,GO:0006355,GO:0007623,GO:0009409,GO:0009651,GO:0009723,GO:0009733,GO:0009737,GO:0009739,GO:0009751,GO:0009753,GO:0042752,GO:0042754,GO:0043433,GO:0044212,GO:0046686,GO:0048574	DNA-binding transcription factor activity|nucleus|regulation of transcription, DNA-templated|circadian rhythm|response to cold|response to salt stress|response to ethylene|response to auxin|response to abscisic acid|response to gibberellin|response to salicylic acid|response to jasmonic acid|regulation of circadian rhythm|negative regulation of circadian rhythm|negative regulation of DNA-binding …
Cse_sc001688.1_g020.1	104.001	42.5204	0.408844	0.00524664	Down
Cse_sc001690.1_g010.1	55.7999	14.5357	0.260497	8.33442e-05	Down	PMR5	Protein PMR5	GO:0005783,GO:0005794,GO:0006952,GO:0009620,GO:0016021,GO:0016413	endoplasmic reticulum|Golgi apparatus|defense response|response to fungus|integral component of membrane|O-acetyltransferase activity
Cse_sc001690.1_g020.1	41.2087	6.6643	0.161721	2.82878e-06	Down	IDM1	Increased DNA methylation 1	GO:0004402,GO:0005634,GO:0009506,GO:0010385,GO:0042393,GO:0043971,GO:0043972,GO:0044030,GO:0044154,GO:0046872,GO:0080188	histone acetyltransferase activity|nucleus|plasmodesma|double-stranded methylated DNA binding|histone binding|histone H3-K18 acetylation|histone H3-K23 acetylation|regulation of DNA methylation|histone H3-K14 acetylation|metal ion binding|RNA-directed DNA methylation
Cse_sc001690.1_g070.1	252.445	884.971	3.5056	2.09963e-08	Up	AUX22D	Auxin-induced protein 22D	GO:0005634,GO:0006355,GO:0009734	nucleus|regulation of transcription, DNA-templated|auxin-activated signaling pathway
Cse_sc001694.1_g010.1	60.5257	4.32419	0.0714438	0.000155448	Down	PPRD2	Polyprenol reductase 2	GO:0003865,GO:0005783,GO:0005789,GO:0005794,GO:0006487,GO:0006488,GO:0016021,GO:0016095,GO:0019408,GO:0102389	3-oxo-5-alpha-steroid 4-dehydrogenase activity|endoplasmic reticulum|endoplasmic reticulum membrane|Golgi apparatus|protein N-linked glycosylation|dolichol-linked oligosaccharide biosynthetic process|integral component of membrane|polyprenol catabolic process|dolichol biosynthetic process|polyprenol reductase activity
Cse_sc001695.1_g050.1	7.30847	0.652959	0.0893428	0.0123224	Down	At1g77330	1-aminocyclopropane-1-carboxylate oxidase 5	GO:0006952,GO:0009693,GO:0009815,GO:0031418,GO:0046872,GO:0051213	defense response|ethylene biosynthetic process|1-aminocyclopropane-1-carboxylate oxidase activity|L-ascorbic acid binding|metal ion binding|dioxygenase activity
Cse_sc001696.1_g010.1	106.819	316.777	2.96554	1.16087e-05	Up	REV3	DNA polymerase zeta catalytic subunit	GO:0000166,GO:0003677,GO:0003887,GO:0005634,GO:0006260,GO:0006974,GO:0016035,GO:0042276,GO:0046872,GO:0051539,GO:0071494,GO:0090305	nucleotide binding|DNA binding|DNA-directed DNA polymerase activity|nucleus|DNA replication|cellular response to DNA damage stimulus|zeta DNA polymerase complex|error-prone translesion synthesis|metal ion binding|4 iron, 4 sulfur cluster binding|cellular response to UV-C|nucleic acid phosphodiester bond hydrolysis
Cse_sc001697.1_g060.1	427.571	901.522	2.10847	0.00146093	Up	ARF16	Auxin response factor 16	GO:0003677,GO:0003700,GO:0005634,GO:0007389,GO:0009733,GO:0009734,GO:0035198,GO:0048829,GO:0051301	DNA binding|DNA-binding transcription factor activity|nucleus|pattern specification process|response to auxin|auxin-activated signaling pathway|miRNA binding|root cap development|cell division
Cse_sc001698.1_g010.1	323.777	682.069	2.1066	0.000706076	Up	SUD1	Probable E3 ubiquitin ligase SUD1	GO:0004842,GO:0008270,GO:0008299,GO:0009414,GO:0010025,GO:0010143,GO:0010345,GO:0030176,GO:0030433,GO:0042335,GO:1900490	ubiquitin-protein transferase activity|zinc ion binding|isoprenoid biosynthetic process|response to water deprivation|wax biosynthetic process|cutin biosynthetic process|suberin biosynthetic process|integral component of endoplasmic reticulum membrane|ubiquitin-dependent ERAD pathway|cuticle development|positive regulation of hydroxymethylglutaryl-CoA reductase (NADPH) activity
Cse_sc001698.1_g050.1	28.3462	0.321973	0.0113586	4.3154e-10	Down	MCM7	DNA replication licensing factor MCM7	GO:0000347,GO:0003677,GO:0003678,GO:0005524,GO:0005737,GO:0006270,GO:0007049,GO:0042555	THO complex|DNA binding|DNA helicase activity|ATP binding|cytoplasm|DNA replication initiation|cell cycle|MCM complex
Cse_sc001699.1_g010.1	1490.72	1.30592	0.000876034	2.61435e-76	Down	CXE2	Probable carboxylesterase 2	GO:0052689	carboxylic ester hydrolase activity
Cse_sc001700.1_g050.1	149.302	32.541	0.217955	4.31506e-05	Down		Squalene monooxygenase	GO:0004506,GO:0016021,GO:0050660	squalene monooxygenase activity|integral component of membrane|flavin adenine dinucleotide binding
Cse_sc001701.1_g090.1	6.17712	0.70871	0.114731	0.0305916	Down
Cse_sc001702.1_g120.1	237.919	114.214	0.480052	0.00183703	Down
Cse_sc001706.1_g070.1	328.642	143.239	0.435853	0.000378417	Down
Cse_sc001707.1_g050.1	97.5227	10.787	0.11061	3.96284e-12	Down	MYB17	Transcription factor MYB41	GO:0003700,GO:0005634,GO:0009751,GO:0009753,GO:0009908,GO:0009909,GO:0030154,GO:0043565,GO:0044212	DNA-binding transcription factor activity|nucleus|response to salicylic acid|response to jasmonic acid|flower development|regulation of flower development|cell differentiation|sequence-specific DNA binding|transcription regulatory region DNA binding
Cse_sc001707.1_g060.1	120.81	1222.98	10.1231	1.64746e-11	Up	At3g61260	Uncharacterized protein At3g61260	GO:0005773,GO:0005886,GO:0009506	vacuole|plasma membrane|plasmodesma
Cse_sc001708.1_g010.1	5402.45	301.79	0.0558617	3.1202e-05	Down	LOX2.1	Linoleate 13S-lipoxygenase 2-1, chloroplastic	GO:0009534,GO:0009570,GO:0010597,GO:0016165,GO:0031408,GO:0046872	chloroplast thylakoid|chloroplast stroma|green leaf volatile biosynthetic process|linoleate 13S-lipoxygenase activity|oxylipin biosynthetic process|metal ion binding
Cse_sc001713.1_g030.1	227.626	56.3765	0.247671	0.0287506	Down	CALS5	Callose synthase 5	GO:0000148,GO:0003843,GO:0006075,GO:0008360,GO:0009556,GO:0009846,GO:0009860,GO:0010208,GO:0016021,GO:0071555,GO:0080092	1,3-beta-D-glucan synthase complex|1,3-beta-D-glucan synthase activity|(1->3)-beta-D-glucan biosynthetic process|regulation of cell shape|microsporogenesis|pollen germination|pollen tube growth|pollen wall assembly|integral component of membrane|cell wall organization|regulation of pollen tube growth
Cse_sc001714.1_g090.1	65.8985	8.03499	0.12193	0.00182832	Down	ATL6	E3 ubiquitin-protein ligase ATL6	GO:0004842,GO:0005886,GO:0009814,GO:0009816,GO:0010200,GO:0016021,GO:0016567,GO:0046872	ubiquitin-protein transferase activity|plasma membrane|defense response, incompatible interaction|defense response to bacterium, incompatible interaction|response to chitin|integral component of membrane|protein ubiquitination|metal ion binding
Cse_sc001715.1_g060.1	4.57857	0	0	0.0136592	Down	At3g08750	F-box protein At3g08750
Cse_sc001716.1_g080.1	143.484	9.99553	0.0696628	2.34319e-08	Down	PUB34	U-box domain-containing protein 34
Cse_sc001718.1_g020.1	5.28942	0	0	0.0201924	Down	At3g47570	Probable LRR receptor-like serine/threonine-protein kinase At3g47570
Cse_sc001719.1_g030.1	342.757	772.995	2.25523	0.00022876	Up
Cse_sc001721.1_g050.1	219.567	39.6842	0.180738	5.1494e-11	Down	SMO1-2	Methylsterol monooxygenase 1-2	GO:0000254,GO:0005506,GO:0005789,GO:0016021,GO:0016126,GO:0080064	C-4 methylsterol oxidase activity|iron ion binding|endoplasmic reticulum membrane|integral component of membrane|sterol biosynthetic process|4,4-dimethyl-9beta,19-cyclopropylsterol oxidation
Cse_sc001722.1_g010.1	25.3279	0.70871	0.0279814	4.48827e-07	Down	TPS13	Probable terpene synthase 13	GO:0000287,GO:0010333	magnesium ion binding|terpene synthase activity
Cse_sc001725.1_g090.1	77.4167	30.917	0.399358	0.00137059	Down	At1g47710	Serpin-ZX	GO:0004867,GO:0004869,GO:0005615,GO:0005737,GO:0010951,GO:0048046	serine-type endopeptidase inhibitor activity|cysteine-type endopeptidase inhibitor activity|extracellular space|cytoplasm|negative regulation of endopeptidase activity|apoplast
Cse_sc001732.1_g030.1	328.253	8.11593	0.0247246	7.85598e-06	Down	ADF7	Actin-depolymerizing factor 7	GO:0003779,GO:0005737,GO:0005884,GO:0030042	actin binding|cytoplasm|actin filament|actin filament depolymerization
Cse_sc001737.1_g050.1	10.6127	2.55059	0.240333	0.0242265	Down	DES8.11	Delta(12) fatty acid desaturase DES8.11	GO:0006636,GO:0016021,GO:0016717	unsaturated fatty acid biosynthetic process|integral component of membrane|oxidoreductase activity, acting on paired donors, with oxidation of a pair of donors resulting in the reduction of molecular oxygen to two molecules of water
Cse_sc001738.1_g080.1	34.6908	132.268	3.81276	6.27226e-07	Up	WRKY57	Probable WRKY transcription factor 57	GO:0003700,GO:0005634,GO:0006970,GO:0009414,GO:0009651,GO:0043565,GO:0044212	DNA-binding transcription factor activity|nucleus|response to osmotic stress|response to water deprivation|response to salt stress|sequence-specific DNA binding|transcription regulatory region DNA binding
Cse_sc001739.1_g060.1	1073.94	2246.2	2.09155	0.000600692	Up	PAP14	Probable plastid-lipid-associated protein 14, chloroplastic	GO:0004693,GO:0005524,GO:0005634,GO:0005737,GO:0006468,GO:0009507	cyclin-dependent protein serine/threonine kinase activity|ATP binding|nucleus|cytoplasm|protein phosphorylation|chloroplast
Cse_sc001743.1_g050.1	12.5635	32.043	2.55048	0.0110477	Up		Cytochrome b5	GO:0005789,GO:0016021,GO:0020037,GO:0031090,GO:0046872,GO:0055114	endoplasmic reticulum membrane|integral component of membrane|heme binding|organelle membrane|metal ion binding|oxidation-reduction process
Cse_sc001743.1_g070.1	131.237	3.66573	0.0279322	7.3058e-18	Down	PME29	Probable pectinesterase 29	GO:0005576,GO:0005618,GO:0030599,GO:0042545,GO:0045330,GO:0045490	extracellular region|cell wall|pectinesterase activity|cell wall modification|aspartyl esterase activity|pectin catabolic process
Cse_sc001747.1_g070.1	4.8917	0	0	0.0116668	Down	AtMg01250	Uncharacterized mitochondrial protein AtMg01250	GO:0005739	mitochondrion
Cse_sc001748.1_g010.1	401.967	56.0167	0.139356	1.62376e-15	Down	SFGH	S-formylglutathione hydrolase	GO:0005829,GO:0018738,GO:0046294,GO:0046686,GO:0048046,GO:0052689	cytosol|S-formylglutathione hydrolase activity|formaldehyde catabolic process|response to cadmium ion|apoplast|carboxylic ester hydrolase activity
Cse_sc001748.1_g020.1	464.092	120.123	0.258834	1.88638e-05	Down
Cse_sc001748.1_g060.1	1.24191	125.16	100.781	7.22102e-05	Up	At5g01750	Protein LURP-one-related 15	GO:0009507,GO:0019904	chloroplast|protein domain specific binding
Cse_sc001748.1_g090.1	24.5868	0.377723	0.0153628	6.01715e-09	Down	CAS1	Cycloartenol synthase	GO:0005773,GO:0009555,GO:0010027,GO:0016871,GO:0019745	vacuole|pollen development|thylakoid membrane organization|cycloartenol synthase activity|pentacyclic triterpenoid biosynthetic process
Cse_sc001748.1_g150.1	0.32946	7.704	23.3837	0.00290292	Up
Cse_sc001748.1_g160.1	1077.11	6.1986	0.00575485	1.53214e-10	Down	PME4	Pectinesterase 4	GO:0005576,GO:0005618,GO:0009506,GO:0030599,GO:0042545,GO:0045330,GO:0045490,GO:0046910,GO:0090406	extracellular region|cell wall|plasmodesma|pectinesterase activity|cell wall modification|aspartyl esterase activity|pectin catabolic process|pectinesterase inhibitor activity|pollen tube
Cse_sc001749.1_g030.1	14.2365	0.965918	0.0678478	0.000182558	Down	At1g65750	Putative ribonuclease H protein At1g65750	GO:0003676,GO:0004523,GO:0046872	nucleic acid binding|RNA-DNA hybrid ribonuclease activity|metal ion binding
Cse_sc001753.1_g020.1	145.058	2.04334	0.0140863	1.34978e-07	Down	CSLD1	Cellulose synthase-like protein D1	GO:0000139,GO:0005794,GO:0005802,GO:0005886,GO:0009833,GO:0009846,GO:0016021,GO:0016760,GO:0030244,GO:0051753,GO:0071555	Golgi membrane|Golgi apparatus|trans-Golgi network|plasma membrane|plant-type primary cell wall biogenesis|pollen germination|integral component of membrane|cellulose synthase (UDP-forming) activity|cellulose biosynthetic process|mannan synthase activity|cell wall organization
Cse_sc001754.1_g050.1	3697.35	1554.98	0.420565	7.59647e-05	Down		2,3-bisphosphoglycerate-independent phosphoglycerate mutase	GO:0004619,GO:0005737,GO:0006007,GO:0006096,GO:0030145	phosphoglycerate mutase activity|cytoplasm|glucose catabolic process|glycolytic process|manganese ion binding
Cse_sc001754.1_g060.1	17.9949	60.1216	3.34103	0.000132362	Up	PMA4	Plasma membrane ATPase 4	GO:0005524,GO:0005886,GO:0008553,GO:0016021,GO:0046872,GO:0120029	ATP binding|plasma membrane|proton-exporting ATPase activity, phosphorylative mechanism|integral component of membrane|metal ion binding|proton export across plasma membrane
Cse_sc001756.1_g010.1	517.785	18.5686	0.0358617	1.64255e-10	Down	SWEET3B	Bidirectional sugar transporter SWEET3b	GO:0005887,GO:0051119	integral component of plasma membrane|sugar transmembrane transporter activity
Cse_sc001756.1_g050.1	29.2663	11.0713	0.378294	0.0106041	Down	TPP2	Probable trehalose-phosphate phosphatase 2	GO:0004805,GO:0005992	trehalose-phosphatase activity|trehalose biosynthetic process
Cse_sc001757.1_g030.1	2938.84	789.474	0.268634	1.83938e-09	Down	ECHIA	Probable enoyl-CoA hydratase 1, peroxisomal	GO:0004300,GO:0005777,GO:0006635	enoyl-CoA hydratase activity|peroxisome|fatty acid beta-oxidation
Cse_sc001757.1_g050.1	155.078	1.73038	0.0111581	3.15803e-09	Down	PME67	Probable pectinesterase 67	GO:0005576,GO:0005618,GO:0030599,GO:0042545,GO:0045330,GO:0045490	extracellular region|cell wall|pectinesterase activity|cell wall modification|aspartyl esterase activity|pectin catabolic process
Cse_sc001758.1_g060.1	6.53034	1.02167	0.156449	0.039244	Down	EPF2	Protein EPIDERMAL PATTERNING FACTOR 2	GO:0005576,GO:0010052,GO:0010374,GO:0019901,GO:0090626,GO:2000122	extracellular region|guard cell differentiation|stomatal complex development|protein kinase binding|plant epidermis morphogenesis|negative regulation of stomatal complex development
Cse_sc001758.1_g090.1	119.836	15.8522	0.132282	4.8127e-05	Down	TGA7	Transcription factor TGA7	GO:0003700,GO:0005634,GO:0006351,GO:0042742,GO:0043565	DNA-binding transcription factor activity|nucleus|transcription, DNA-templated|defense response to bacterium|sequence-specific DNA binding
Cse_sc001759.1_g030.1	22.8054	2.28085	0.100013	2.37409e-05	Down	CSLA9	Glucomannan 4-beta-mannosyltransferase 9	GO:0000139,GO:0009294,GO:0009617,GO:0016021,GO:0047259,GO:0051753,GO:0071555	Golgi membrane|DNA mediated transformation|response to bacterium|integral component of membrane|glucomannan 4-beta-mannosyltransferase activity|mannan synthase activity|cell wall organization
Cse_sc001763.1_g030.1	354.633	108.783	0.306749	5.08823e-07	Down	KNAT6	Homeobox protein knotted-1-like 6	GO:0003700,GO:0005634,GO:0010073,GO:0043565	DNA-binding transcription factor activity|nucleus|meristem maintenance|sequence-specific DNA binding
Cse_sc001769.1_g050.1	2.44152	50.0504	20.4997	3.28106e-09	Up	WAKL2	Wall-associated receptor kinase-like 2
Cse_sc001771.1_g010.1	4.3933	0	0	0.0175924	Down
Cse_sc001772.1_g110.1	287.41	1145.26	3.98476	3.3288e-08	Up	ATJ20	Chaperone protein dnaJ 20, chloroplastic	GO:0005634,GO:0009507,GO:0010322,GO:0061077,GO:1902395	nucleus|chloroplast|regulation of isopentenyl diphosphate biosynthetic process, methylerythritol 4-phosphate pathway|chaperone-mediated protein folding|regulation of 1-deoxy-D-xylulose-5-phosphate synthase activity
Cse_sc001777.1_g040.1	4.24167	12.9023	3.0418	0.0399252	Up		Glutathione reductase, cytosolic	GO:0004362,GO:0005737,GO:0006749,GO:0009055,GO:0045454,GO:0050660,GO:0050661	glutathione-disulfide reductase activity|cytoplasm|glutathione metabolic process|electron transfer activity|cell redox homeostasis|flavin adenine dinucleotide binding|NADP binding
Cse_sc001778.1_g050.1	587.726	1339.11	2.27845	0.00118868	Up	GILP	GSH-induced LITAF domain protein	GO:0005886,GO:0034051,GO:0046872	plasma membrane|negative regulation of plant-type hypersensitive response|metal ion binding
Cse_sc001780.1_g090.1	37.5651	0	0	7.33989e-14	Down		Histone H2A	GO:0000786,GO:0003677,GO:0005634,GO:0046982	nucleosome|DNA binding|nucleus|protein heterodimerization activity
Cse_sc001782.1_g010.1	203.268	2.76106	0.0135834	2.62938e-06	Down	At3g51470	Probable protein phosphatase 2C 47	GO:0004722,GO:0046872	protein serine/threonine phosphatase activity|metal ion binding
Cse_sc001783.1_g060.1	30.4003	10.3427	0.340217	0.0287711	Down	DREB1E	Dehydration-responsive element-binding protein 1E	GO:0003677,GO:0003700,GO:0005634,GO:0010371,GO:0048510	DNA binding|DNA-binding transcription factor activity|nucleus|regulation of gibberellin biosynthetic process|regulation of timing of transition from vegetative to reproductive phase
Cse_sc001783.1_g110.1	185.12	1.78613	0.00964847	4.4625e-11	Down	WLIM2B	LIM domain-containing protein WLIM2b	GO:0003729,GO:0005737,GO:0005856,GO:0046872,GO:0051015,GO:0051017	mRNA binding|cytoplasm|cytoskeleton|metal ion binding|actin filament binding|actin filament bundle assembly
Cse_sc001783.1_g130.1	47.5573	507.639	10.6743	5.62131e-21	Up	TET10	Tetraspanin-10	GO:0005886,GO:0009506,GO:0016021	plasma membrane|plasmodesma|integral component of membrane
Cse_sc001786.1_g020.1	9.14202	26.2995	2.87677	0.0094519	Up	ANX2	Receptor-like protein kinase ANXUR2
Cse_sc001788.1_g010.1	52.3332	140.852	2.69145	0.00700191	Up	UGT91D1	UDP-glycosyltransferase 91D1	GO:0016758	transferase activity, transferring hexosyl groups
Cse_sc001788.1_g020.1	91.7571	25.4232	0.277071	7.62993e-06	Down	RPA1B	Replication protein A 70 kDa DNA-binding subunit B	GO:0000723,GO:0000724,GO:0000784,GO:0003684,GO:0003697,GO:0005662,GO:0006261,GO:0006268,GO:0006281,GO:0006289,GO:0007004,GO:0010224,GO:0043047,GO:0043565,GO:0046872,GO:0051321	telomere maintenance|double-strand break repair via homologous recombination|nuclear chromosome, telomeric region|damaged DNA binding|single-stranded DNA binding|DNA replication factor A complex|DNA-dependent DNA replication|DNA unwinding involved in DNA replication|DNA repair|nucleotide-excision repair|telomere maintenance via telomerase|response to UV-B|single-stranded telomeric DNA binding|seq…
Cse_sc001790.1_g030.1	99.3812	712.506	7.16942	1.55623e-16	Up
Cse_sc001790.1_g050.1	85.6123	314.979	3.67913	0.0114162	Up	RHA1B	E3 ubiquitin-protein ligase RHA1B	GO:0004842,GO:0010200,GO:0016567,GO:0046686,GO:0046872	ubiquitin-protein transferase activity|response to chitin|protein ubiquitination|response to cadmium ion|metal ion binding
Cse_sc001794.1_g030.1	29.3237	4.51663	0.154027	3.7799e-05	Down	KUA1	Transcription factor KUA1	GO:0000122,GO:0000976,GO:0003700,GO:0005634,GO:0006355,GO:0008270,GO:0009646,GO:0009651,GO:0009723,GO:0009733,GO:0009737,GO:0009739,GO:0009744,GO:0009751,GO:0009753,GO:0010150,GO:0010252,GO:0030307,GO:0045892,GO:0046686,GO:0048366,GO:0048527,GO:0090697,GO:2000469	negative regulation of transcription by RNA polymerase II|transcription regulatory region sequence-specific DNA binding|DNA-binding transcription factor activity|nucleus|regulation of transcription, DNA-templated|zinc ion binding|response to absence of light|response to salt stress|response to ethylene|response to auxin|response to abscisic acid|response to gibberellin|response to sucrose|respons…
Cse_sc001796.1_g070.1	762.745	38.9822	0.0511078	7.0064e-31	Down	CYP82G1	Cytochrome P450 82G1	GO:0005506,GO:0006952,GO:0016020,GO:0016021,GO:0016114,GO:0016709,GO:0020037,GO:0042343,GO:0046246,GO:0097007,GO:0097008	iron ion binding|defense response|membrane|integral component of membrane|terpenoid biosynthetic process|oxidoreductase activity, acting on paired donors, with incorporation or reduction of molecular oxygen, NAD(P)H as one donor, and incorporation of one atom of oxygen|heme binding|indole glucosinolate metabolic process|terpene biosynthetic process|4,8,12-trimethyltrideca-1,3,7,11-tetraene syntha…
Cse_sc001798.1_g070.1	18.2915	3.55071	0.194118	0.0101201	Down
Cse_sc001799.1_g010.1	28.759	133.113	4.62857	2.53447e-08	Up	RE1	Retrovirus-related Pol polyprotein from transposon RE1	GO:0000943,GO:0003676,GO:0003964,GO:0004190,GO:0004519,GO:0006310,GO:0015074,GO:0046872	retrotransposon nucleocapsid|nucleic acid binding|RNA-directed DNA polymerase activity|aspartic-type endopeptidase activity|endonuclease activity|DNA recombination|DNA integration|metal ion binding
Cse_sc001800.1_g050.1	12.469	33.8973	2.71852	0.0466572	Up	At5g03100	F-box protein At5g03100	GO:0005777	peroxisome
Cse_sc001801.1_g060.1	85.3945	2.01463	0.023592	3.6486e-09	Down
Cse_sc001801.1_g070.1	0.903792	11.7314	12.9802	0.00126654	Up	CHI1	Chalcone--flavonone isomerase 1	GO:0009813,GO:0045430	flavonoid biosynthetic process|chalcone isomerase activity
Cse_sc001801.1_g120.1	390.905	979.131	2.50478	0.0335652	Up	MEE14	CCG-binding protein 1	GO:0005634,GO:0005829,GO:0009507,GO:0009793,GO:0010183,GO:0036033,GO:0050832	nucleus|cytosol|chloroplast|embryo development ending in seed dormancy|pollen tube guidance|mediator complex binding|defense response to fungus
Cse_sc001802.1_g100.1	1279.93	192.74	0.150586	3.66212e-07	Down	MLP423	MLP-like protein 423	GO:0006952,GO:0016020	defense response|membrane
Cse_sc001803.1_g020.1	404.612	15.7896	0.039024	2.11595e-07	Down	SDR1	(+)-neomenthol dehydrogenase	GO:0005737,GO:0006952,GO:0047501,GO:0055114	cytoplasm|defense response|(+)-neomenthol dehydrogenase activity|oxidation-reduction process
Cse_sc001805.1_g010.1	778.81	2.15484	0.00276684	7.66247e-06	Down	ACA4	Alpha carbonic anhydrase 4	GO:0004089,GO:0008270,GO:0009535,GO:0009570	carbonate dehydratase activity|zinc ion binding|chloroplast thylakoid membrane|chloroplast stroma
Cse_sc001805.1_g050.1	429.774	24.2794	0.0564934	1.95078e-06	Down	ACA4	Alpha carbonic anhydrase 4	GO:0004089,GO:0008270,GO:0009535,GO:0009570	carbonate dehydratase activity|zinc ion binding|chloroplast thylakoid membrane|chloroplast stroma
Cse_sc001806.1_g070.1	73.9336	8.91095	0.120526	0.0077809	Down	CAISE5	Glucose and ribitol dehydrogenase	GO:0016491	oxidoreductase activity
Cse_sc001806.1_g090.1	23.5446	4.01123	0.170368	0.000534204	Down	CAISE5	Glucose and ribitol dehydrogenase	GO:0016491	oxidoreductase activity
Cse_sc001808.1_g040.1	535.981	242.99	0.453356	0.00051679	Down	HAT4	Homeobox-leucine zipper protein HAT4	GO:0003700,GO:0005634,GO:0008283,GO:0009585,GO:0009641,GO:0009733,GO:0009735,GO:0009826,GO:0010016,GO:0010017,GO:0010218,GO:0042803,GO:0043565,GO:0045892,GO:0048364	DNA-binding transcription factor activity|nucleus|cell proliferation|red, far-red light phototransduction|shade avoidance|response to auxin|response to cytokinin|unidimensional cell growth|shoot system morphogenesis|red or far-red light signaling pathway|response to far red light|protein homodimerization activity|sequence-specific DNA binding|negative regulation of transcription, DNA-templated|ro…
Cse_sc001812.1_g020.1	17.8168	0.321973	0.0180713	1.962e-05	Down	Os05g0239150	Zinc finger BED domain-containing protein RICESLEEPER 1	GO:0003677,GO:0005634,GO:0009791,GO:0046872,GO:0046983	DNA binding|nucleus|post-embryonic development|metal ion binding|protein dimerization activity
Cse_sc001812.1_g070.1	14.0849	1.88862	0.134088	0.00102719	Down	EC1.2	Egg cell-secreted protein 1.2	GO:0005576,GO:0007338,GO:0009567,GO:0031410,GO:0031982,GO:0080155,GO:2000008	extracellular region|single fertilization|double fertilization forming a zygote and endosperm|cytoplasmic vesicle|vesicle|regulation of double fertilization forming a zygote and endosperm|regulation of protein localization to cell surface
Cse_sc001820.1_g070.1	72.0848	189.274	2.62572	0.0096858	Up
Cse_sc001820.1_g080.1	9.04902	50.8184	5.6159	0.000831798	Up	CYP90A1	Cytochrome P450 90A1	GO:0004497,GO:0005506,GO:0007275,GO:0009911,GO:0010224,GO:0010268,GO:0010584,GO:0016021,GO:0016125,GO:0016132,GO:0016705,GO:0020037,GO:0048657,GO:0055114	monooxygenase activity|iron ion binding|multicellular organism development|positive regulation of flower development|response to UV-B|brassinosteroid homeostasis|pollen exine formation|integral component of membrane|sterol metabolic process|brassinosteroid biosynthetic process|oxidoreductase activity, acting on paired donors, with incorporation or reduction of molecular oxygen|heme binding|anther…
Cse_sc001827.1_g050.1	7.4601	0.965918	0.129478	0.0207414	Down
Cse_sc001829.1_g070.1	849.126	109.877	0.1294	6.84853e-18	Down	SBT1.3	Subtilisin-like protease SBT1.3	GO:0004252,GO:0005576	serine-type endopeptidase activity|extracellular region
Cse_sc001835.1_g040.1	895.655	299.572	0.334472	8.68366e-07	Down	BIM1	Transcription factor BIM1	GO:0003677,GO:0005634,GO:0046983	DNA binding|nucleus|protein dimerization activity
Cse_sc001836.1_g010.1	84.781	35.7629	0.421827	0.00262289	Down
Cse_sc001837.1_g030.1	5541.25	20827.4	3.75861	0.0138384	Up	At5g66900	Probable disease resistance protein At5g66900
Cse_sc001841.1_g030.1	15.5717	2.02364	0.129956	0.000782695	Down	KIN13B	Kinesin-like protein KIN-13B	GO:0003777,GO:0005524,GO:0005634,GO:0005871,GO:0005874,GO:0005886,GO:0007018,GO:0008017,GO:0016887,GO:1903338	microtubule motor activity|ATP binding|nucleus|kinesin complex|microtubule|plasma membrane|microtubule-based movement|microtubule binding|ATPase activity|regulation of cell wall organization or biogenesis
Cse_sc001844.1_g050.1	80.4222	29.3792	0.365312	0.000439361	Down	BB	E3 ubiquitin-protein ligase BIG BROTHER	GO:0004842,GO:0008285,GO:0016567,GO:0031624,GO:0046621,GO:0046872,GO:0048437,GO:0051865,GO:1900057	ubiquitin-protein transferase activity|negative regulation of cell proliferation|protein ubiquitination|ubiquitin conjugating enzyme binding|negative regulation of organ growth|metal ion binding|floral organ development|protein autoubiquitination|positive regulation of leaf senescence
Cse_sc001845.1_g010.1	50.6298	24.7544	0.488929	0.0334401	Down	UGT74E2	UDP-glycosyltransferase 74E2	GO:0008194,GO:0010016,GO:0035251,GO:0042631,GO:0043231,GO:0052638,GO:0070301,GO:0071215,GO:0071475,GO:0080024,GO:0080043,GO:0080044,GO:0080167	UDP-glycosyltransferase activity|shoot system morphogenesis|UDP-glucosyltransferase activity|cellular response to water deprivation|intracellular membrane-bounded organelle|indole-3-butyrate beta-glucosyltransferase activity|cellular response to hydrogen peroxide|cellular response to abscisic acid stimulus|cellular hyperosmotic salinity response|indolebutyric acid metabolic process|quercetin 3-O-…
Cse_sc001845.1_g020.1	112.204	31.1976	0.278044	3.01705e-06	Down	UGT74E2	UDP-glycosyltransferase 74E2	GO:0008194,GO:0010016,GO:0035251,GO:0042631,GO:0043231,GO:0052638,GO:0070301,GO:0071215,GO:0071475,GO:0080024,GO:0080043,GO:0080044,GO:0080167	UDP-glycosyltransferase activity|shoot system morphogenesis|UDP-glucosyltransferase activity|cellular response to water deprivation|intracellular membrane-bounded organelle|indole-3-butyrate beta-glucosyltransferase activity|cellular response to hydrogen peroxide|cellular response to abscisic acid stimulus|cellular hyperosmotic salinity response|indolebutyric acid metabolic process|quercetin 3-O-…
Cse_sc001849.1_g020.1	323.659	1190.91	3.67952	6.39994e-09	Up		Non-specific lipid-transfer protein	GO:0006869,GO:0008289	lipid transport|lipid binding
Cse_sc001852.1_g050.1	17.0498	3.05432	0.179141	0.0016798	Down
Cse_sc001853.1_g020.1	43.7999	187.526	4.28143	3.70288e-06	Up	GGT3	Glutathione hydrolase 3	GO:0000048,GO:0005773,GO:0005774,GO:0006520,GO:0006536,GO:0006749,GO:0006751,GO:0006805,GO:0009636,GO:0016021,GO:0016756,GO:0019344,GO:0036374,GO:0102953,GO:0103068	peptidyltransferase activity|vacuole|vacuolar membrane|cellular amino acid metabolic process|glutamate metabolic process|glutathione metabolic process|glutathione catabolic process|xenobiotic metabolic process|response to toxic substance|integral component of membrane|glutathione gamma-glutamylcysteinyltransferase activity|cysteine biosynthetic process|glutathione hydrolase activity|hypoglycin A …
Cse_sc001854.1_g020.1	3.5914	11.7297	3.26606	0.0355881	Up	STC	Sugar carrier protein C	GO:0008643,GO:0015293,GO:0016021	carbohydrate transport|symporter activity|integral component of membrane
Cse_sc001855.1_g070.1	3.4722	15.8814	4.57387	0.0353834	Up	AMC1	Metacaspase-1	GO:0004197,GO:0006952,GO:0043068	cysteine-type endopeptidase activity|defense response|positive regulation of programmed cell death
Cse_sc001864.1_g010.1	300.872	42.1248	0.140009	8.83199e-15	Down	COMT	Caffeic acid 3-O-methyltransferase	GO:0009809,GO:0046983,GO:0047763	lignin biosynthetic process|protein dimerization activity|caffeate O-methyltransferase activity
Cse_sc001873.1_g050.1	76.4049	6.16607	0.0807025	0.000263756	Down	NDA1	Internal alternative NAD(P)H-ubiquinone oxidoreductase A1, mitochondrial	GO:0003954,GO:0003959,GO:0005739,GO:0005759,GO:0005777,GO:0031304,GO:0055114,GO:0071482	NADH dehydrogenase activity|NADPH dehydrogenase activity|mitochondrion|mitochondrial matrix|peroxisome|intrinsic component of mitochondrial inner membrane|oxidation-reduction process|cellular response to light stimulus
Cse_sc001873.1_g060.1	3327.59	6819.58	2.0494	0.000932702	Up	ENDO1	Endonuclease 1	GO:0000014,GO:0003676,GO:0004519,GO:0004521,GO:0006308,GO:0008309,GO:0010150,GO:0016891,GO:0043765,GO:0046872,GO:0080187,GO:0090502	single-stranded DNA endodeoxyribonuclease activity|nucleic acid binding|endonuclease activity|endoribonuclease activity|DNA catabolic process|double-stranded DNA exodeoxyribonuclease activity|leaf senescence|endoribonuclease activity, producing 5'-phosphomonoesters|T/G mismatch-specific endonuclease activity|metal ion binding|floral organ senescence|RNA phosphodiester bond hydrolysis, endonucleol…
Cse_sc001873.1_g110.1	6.58129	16.8725	2.5637	0.047317	Up	Os03g0255100	Beta-galactosidase 6	GO:0004565,GO:0005618,GO:0005773,GO:0005975,GO:0030246,GO:0048046	beta-galactosidase activity|cell wall|vacuole|carbohydrate metabolic process|carbohydrate binding|apoplast
Cse_sc001873.1_g130.1	24.5542	2.9248	0.119116	0.00150505	Down	At4g20840	Berberine bridge enzyme-like 21	GO:0005618,GO:0005886,GO:0016899,GO:0048046,GO:0071949	cell wall|plasma membrane|oxidoreductase activity, acting on the CH-OH group of donors, oxygen as acceptor|apoplast|FAD binding
Cse_sc001874.1_g010.1	1305.44	5323	4.07755	1.32933e-10	Up	PIK-1	Disease resistance protein Pik-1	GO:0005524,GO:0009626,GO:0009870,GO:0042742,GO:0043531	ATP binding|plant-type hypersensitive response|defense response signaling pathway, resistance gene-dependent|defense response to bacterium|ADP binding
Cse_sc001880.1_g070.1	165.75	565.862	3.41395	8.75302e-08	Up	B'GAMMA	Serine/threonine protein phosphatase 2A 59 kDa regulatory subunit B' gamma isoform	GO:0000159,GO:0005634,GO:0005737,GO:0005829,GO:0006555,GO:0006952,GO:0008266,GO:0009742,GO:0009759,GO:0009908,GO:0010090,GO:0031348,GO:0031952,GO:0033353,GO:0072542,GO:0090342,GO:2000377	protein phosphatase type 2A complex|nucleus|cytoplasm|cytosol|methionine metabolic process|defense response|poly(U) RNA binding|brassinosteroid mediated signaling pathway|indole glucosinolate biosynthetic process|flower development|trichome morphogenesis|negative regulation of defense response|regulation of protein autophosphorylation|S-adenosylmethionine cycle|protein phosphatase activator activ…
Cse_sc001884.1_g020.1	11.1959	28.5677	2.55161	0.0176729	Up	FAF3	Protein FANTASTIC FOUR 3
Cse_sc001885.1_g050.1	11.3463	0	0	2.72995e-05	Down
Cse_sc001886.1_g020.1	50.0111	24.4251	0.488393	0.0251161	Down	CXE8	Probable carboxylesterase 8	GO:0052689	carboxylic ester hydrolase activity
Cse_sc001888.1_g060.1	4692.39	13909	2.96415	3.71141e-07	Up	LKR/SDH	Alpha-aminoadipic semialdehyde synthase	GO:0004753,GO:0005737,GO:0019878,GO:0033512,GO:0047130,GO:0047131	saccharopine dehydrogenase activity|cytoplasm|lysine biosynthetic process via aminoadipic acid|L-lysine catabolic process to acetyl-CoA via saccharopine|saccharopine dehydrogenase (NADP+, L-lysine-forming) activity|saccharopine dehydrogenase (NAD+, L-glutamate-forming) activity
Cse_sc001888.1_g100.1	63.563	14.5195	0.228427	6.28941e-06	Down	PME12	Probable pectinesterase/pectinesterase inhibitor 12	GO:0005576,GO:0005618,GO:0009617,GO:0030599,GO:0042545,GO:0045330,GO:0045490,GO:0046910	extracellular region|cell wall|response to bacterium|pectinesterase activity|cell wall modification|aspartyl esterase activity|pectin catabolic process|pectinesterase inhibitor activity
Cse_sc001890.1_g040.1	183.122	82.9191	0.452807	0.00117209	Down	CHR28	Helicase-like transcription factor CHR28	GO:0003677,GO:0004386,GO:0005524,GO:0005634,GO:0006325,GO:0046872,GO:0080188	DNA binding|helicase activity|ATP binding|nucleus|chromatin organization|metal ion binding|RNA-directed DNA methylation
Cse_sc001898.1_g010.1	150.984	468.214	3.10108	2.06742e-05	Up	CSE	Caffeoylshikimate esterase	GO:0003846,GO:0004622,GO:0005783,GO:0005794,GO:0005886,GO:0006979,GO:0009506,GO:0009809,GO:0010043,GO:0016020,GO:0016787,GO:0042542,GO:0046686,GO:0090430	2-acylglycerol O-acyltransferase activity|lysophospholipase activity|endoplasmic reticulum|Golgi apparatus|plasma membrane|response to oxidative stress|plasmodesma|lignin biosynthetic process|response to zinc ion|membrane|hydrolase activity|response to hydrogen peroxide|response to cadmium ion|caffeoyl-CoA: alcohol caffeoyl transferase activity
Cse_sc001898.1_g040.1	113.298	54.9608	0.485099	0.00720391	Down
Cse_sc001902.1_g030.1	12.5462	42.2762	3.36964	0.00408267	Up	AOX4	Ubiquinol oxidase 4, chloroplastic/chromoplastic	GO:0009535,GO:0009579,GO:0009657,GO:0009916,GO:0016021,GO:0016117,GO:0046862,GO:0046872,GO:0070469,GO:0102721	chloroplast thylakoid membrane|thylakoid|plastid organization|alternative oxidase activity|integral component of membrane|carotenoid biosynthetic process|chromoplast membrane|metal ion binding|respiratory chain|ubiquinol:oxygen oxidoreductase activity
Cse_sc001905.1_g060.1	30.8149	13.5806	0.440716	0.0293664	Down
Cse_sc001907.1_g030.1	64.4832	24.465	0.379401	0.00144234	Down	KIN12B	Kinesin-like protein KIN-12B	GO:0003777,GO:0005524,GO:0005871,GO:0005874,GO:0007018,GO:0007112,GO:0008017,GO:0008574,GO:0009524,GO:0016887,GO:0055046,GO:0080175	microtubule motor activity|ATP binding|kinesin complex|microtubule|microtubule-based movement|male meiosis cytokinesis|microtubule binding|ATP-dependent microtubule motor activity, plus-end-directed|phragmoplast|ATPase activity|microgametogenesis|phragmoplast microtubule organization
Cse_sc001910.1_g010.1	74.1521	149.797	2.02013	0.0148297	Up	At5g56590	Glucan endo-1,3-beta-glucosidase 13	GO:0005576,GO:0005886,GO:0005975,GO:0006952,GO:0009505,GO:0031225,GO:0042973,GO:0046658,GO:0071555	extracellular region|plasma membrane|carbohydrate metabolic process|defense response|plant-type cell wall|anchored component of membrane|glucan endo-1,3-beta-D-glucosidase activity|anchored component of plasma membrane|cell wall organization
Cse_sc001911.1_g080.1	26.6452	150.96	5.66556	0.00486474	Up
Cse_sc001912.1_g010.1	39.2859	8.384	0.21341	3.46838e-05	Down
Cse_sc001913.1_g010.1	0.963397	31.6038	32.8046	7.30709e-10	Up	SPBC3H7.11	Uncharacterized methyltransferase C3H7.11	GO:0005634,GO:0005829,GO:0030488,GO:0052735	nucleus|cytosol|tRNA methylation|tRNA (cytosine-3-)-methyltransferase activity
Cse_sc001913.1_g020.1	8.07673	289.813	35.8824	2.82041e-10	Up	MED26A	Probable mediator of RNA polymerase II transcription subunit 26a	GO:0003746,GO:0005634	translation elongation factor activity|nucleus
Cse_sc001915.1_g020.1	10.257	1.0397	0.101364	0.00278378	Down
Cse_sc001919.1_g040.1	75.8535	2.12613	0.0280294	1.5191e-07	Down	SEC1A	Protein transport Sec1a	GO:0006904,GO:0015031	vesicle docking involved in exocytosis|protein transport
Cse_sc001919.1_g050.1	147.336	411.37	2.79205	0.00664937	Up		Vestitone reductase	GO:0006952,GO:0009813,GO:0016491,GO:0050662	defense response|flavonoid biosynthetic process|oxidoreductase activity|coenzyme binding
Cse_sc001921.1_g120.1	4.12344	0	0	0.0235215	Down		Basic secretory protease (Fragments)	GO:0008237,GO:0046872	metallopeptidase activity|metal ion binding
Cse_sc001923.1_g040.1	153.398	405.123	2.641	0.00080126	Up	VBF	F-box protein VBF	GO:0005634,GO:0005737,GO:0030246	nucleus|cytoplasm|carbohydrate binding
Cse_sc001924.1_g020.1	66.2352	6.30109	0.0951321	0.0116454	Down	SEC5A	Exocyst complex component SEC5A	GO:0000145,GO:0001927,GO:0005829,GO:0005886,GO:0006893,GO:0009506,GO:0060321,GO:0070062	exocyst|exocyst assembly|cytosol|plasma membrane|Golgi to plasma membrane transport|plasmodesma|acceptance of pollen|extracellular exosome
Cse_sc001926.1_g020.1	64.8262	26.8032	0.413463	0.00356555	Down	LIMYB	L10-interacting MYB domain-containing protein	GO:0005634	nucleus
Cse_sc001926.1_g030.1	8.00945	0	0	0.00189464	Down	CDR1	Aspartic proteinase CDR1	GO:0004190,GO:0006508,GO:0010310,GO:0010337,GO:0030163,GO:0042742,GO:0048046	aspartic-type endopeptidase activity|proteolysis|regulation of hydrogen peroxide metabolic process|regulation of salicylic acid metabolic process|protein catabolic process|defense response to bacterium|apoplast
Cse_sc001929.1_g020.1	401.124	20.8438	0.0519635	3.05234e-06	Down	PI4KA1	Phosphatidylinositol 4-kinase alpha 1	GO:0004430,GO:0005546,GO:0005737,GO:0005886,GO:0006468,GO:0009506,GO:0016020,GO:0046854,GO:0048015,GO:0048471,GO:0051015,GO:0070273,GO:0070300	1-phosphatidylinositol 4-kinase activity|phosphatidylinositol-4,5-bisphosphate binding|cytoplasm|plasma membrane|protein phosphorylation|plasmodesma|membrane|phosphatidylinositol phosphorylation|phosphatidylinositol-mediated signaling|perinuclear region of cytoplasm|actin filament binding|phosphatidylinositol-4-phosphate binding|phosphatidic acid binding
Cse_sc001929.1_g090.1	1813.3	102.538	0.0565475	2.70696e-17	Down	PERK7	Proline-rich receptor-like protein kinase PERK7
Cse_sc001932.1_g060.1	22.3548	3.17651	0.142095	0.000278986	Down	At1g80440	F-box/kelch-repeat protein At1g80440	GO:0005829,GO:0019005,GO:0080037,GO:2000762	cytosol|SCF ubiquitin ligase complex|negative regulation of cytokinin-activated signaling pathway|regulation of phenylpropanoid metabolic process
Cse_sc001934.1_g050.1	460.974	1103.03	2.39283	0.00327572	Up	HST	Shikimate O-hydroxycinnamoyltransferase	GO:0047172	shikimate O-hydroxycinnamoyltransferase activity
Cse_sc001934.1_g060.1	12.3511	0	0	5.97464e-05	Down	KAS1	3-oxoacyl-[acyl-carrier-protein] synthase I, chloroplastic	GO:0004315,GO:0006633,GO:0009570	3-oxoacyl-[acyl-carrier-protein] synthase activity|fatty acid biosynthetic process|chloroplast stroma
Cse_sc001935.1_g030.1	49.1994	19.9914	0.406334	0.032114	Down	NFYB3	Nuclear transcription factor Y subunit B-3	GO:0003700,GO:0005634,GO:0043565,GO:0045893,GO:0046982	DNA-binding transcription factor activity|nucleus|sequence-specific DNA binding|positive regulation of transcription, DNA-templated|protein heterodimerization activity
Cse_sc001939.1_g050.1	5.82169	0	0	0.00483547	Down	PME29	Probable pectinesterase 29	GO:0005576,GO:0005618,GO:0030599,GO:0042545,GO:0045330,GO:0045490	extracellular region|cell wall|pectinesterase activity|cell wall modification|aspartyl esterase activity|pectin catabolic process
Cse_sc001939.1_g060.1	25.2777	1.40841	0.0557174	0.000242388	Down		Cysteine proteinase inhibitor B	GO:0004869	cysteine-type endopeptidase inhibitor activity
Cse_sc001941.1_g010.1	2322.65	210.617	0.0906795	1.40244e-24	Down
Cse_sc001941.1_g020.1	584.489	219.623	0.375753	1.37493e-05	Down	ERL2	LRR receptor-like serine/threonine-protein kinase ERL2
Cse_sc001944.1_g010.1	30.7644	64.6811	2.10247	0.0162322	Up	FER	Receptor-like protein kinase FERONIA
Cse_sc001944.1_g030.1	13.2385	29.5443	2.23169	0.0372994	Up	At2g23200	Probable receptor-like protein kinase At2g23200
Cse_sc001946.1_g010.1	44.6189	19.8706	0.44534	0.0127892	Down
Cse_sc001949.1_g030.1	105.092	43.7941	0.416722	0.00107919	Down	BBE1	Reticuline oxidase	GO:0009820,GO:0031410,GO:0050468,GO:0071949	alkaloid metabolic process|cytoplasmic vesicle|reticuline oxidase activity|FAD binding
Cse_sc001951.1_g010.1	78.7588	0.321973	0.00408808	2.62818e-09	Down	SRC2	Protein SRC2 homolog	GO:0000326,GO:0005783,GO:0005789,GO:0005886,GO:0006623,GO:0016021,GO:0032586	protein storage vacuole|endoplasmic reticulum|endoplasmic reticulum membrane|plasma membrane|protein targeting to vacuole|integral component of membrane|protein storage vacuole membrane
Cse_sc001952.1_g010.1	14.1337	0.755446	0.0534502	6.25702e-05	Down	EDA2	Probable serine protease EDA2	GO:0005576,GO:0005773,GO:0006508,GO:0008236,GO:0008239,GO:0009561	extracellular region|vacuole|proteolysis|serine-type peptidase activity|dipeptidyl-peptidase activity|megagametogenesis
Cse_sc001961.1_g090.1	2.16301	19.038	8.80162	0.000105865	Up	PRW1	DNA damage-binding protein CMR1	GO:0000790,GO:0003677,GO:0005737,GO:0006974,GO:0034399,GO:2000001	nuclear chromatin|DNA binding|cytoplasm|cellular response to DNA damage stimulus|nuclear periphery|regulation of DNA damage checkpoint
Cse_sc001963.1_g070.1	15.0419	37.9264	2.52139	0.0069738	Up
Cse_sc001964.1_g020.1	66.6385	11.53	0.173022	1.49115e-07	Down	FTIP7	FT-interacting protein 7	GO:0005886,GO:0016021	plasma membrane|integral component of membrane
Cse_sc001964.1_g030.1	2046.78	516.981	0.252583	4.77334e-10	Down	PERK1	Proline-rich receptor-like protein kinase PERK1
Cse_sc001966.1_g010.1	8.65995	2.01463	0.232637	0.0481626	Down	PDF2	Homeobox-leucine zipper protein PROTODERMAL FACTOR 2	GO:0003677,GO:0003700,GO:0005634,GO:0008289,GO:0009845,GO:0009913,GO:0043565,GO:0048825	DNA binding|DNA-binding transcription factor activity|nucleus|lipid binding|seed germination|epidermal cell differentiation|sequence-specific DNA binding|cotyledon development
Cse_sc001966.1_g030.1	12.0325	2.29888	0.191056	0.0121109	Down	PDF2	Homeobox-leucine zipper protein PROTODERMAL FACTOR 2	GO:0003677,GO:0003700,GO:0005634,GO:0008289,GO:0009845,GO:0009913,GO:0043565,GO:0048825	DNA binding|DNA-binding transcription factor activity|nucleus|lipid binding|seed germination|epidermal cell differentiation|sequence-specific DNA binding|cotyledon development
Cse_sc001966.1_g040.1	18.5039	1.35266	0.0731009	0.0001529	Down
Cse_sc001966.1_g060.1	24.2331	3.54355	0.146228	0.00968956	Down	TSB	Tryptophan synthase beta chain 2, chloroplastic	GO:0004834,GO:0009507	tryptophan synthase activity|chloroplast
Cse_sc001968.1_g040.1	10.1292	25.8695	2.55396	0.0249565	Up	ROPGEF3	Rop guanine nucleotide exchange factor 3	GO:0005089	Rho guanyl-nucleotide exchange factor activity
Cse_sc001972.1_g020.1	259.551	37.484	0.144419	5.67983e-07	Down	VHA-G1	V-type proton ATPase subunit G1	GO:0000325,GO:0005773,GO:0005774,GO:0005794,GO:0005829,GO:0005886,GO:0015991,GO:0016469,GO:0016471,GO:0046933	plant-type vacuole|vacuole|vacuolar membrane|Golgi apparatus|cytosol|plasma membrane|ATP hydrolysis coupled proton transport|proton-transporting two-sector ATPase complex|vacuolar proton-transporting V-type ATPase complex|proton-transporting ATP synthase activity, rotational mechanism
Cse_sc001974.1_g020.1	60.0473	26.4252	0.440073	0.00659141	Down	UBC25	Probable ubiquitin-conjugating enzyme E2 25	GO:0005524,GO:0061631	ATP binding|ubiquitin conjugating enzyme activity
Cse_sc001983.1_g030.1	3085.04	13714.3	4.44542	1.78942e-11	Up	CWINV1	Beta-fructofuranosidase, insoluble isoenzyme CWINV1	GO:0004564,GO:0005618,GO:0005886,GO:0005975,GO:0009611,GO:0048046,GO:0050832,GO:0080167	beta-fructofuranosidase activity|cell wall|plasma membrane|carbohydrate metabolic process|response to wounding|apoplast|defense response to fungus|response to karrikin
Cse_sc001984.1_g030.1	7.77225	21.9267	2.82116	0.0171373	Up
Cse_sc001986.1_g040.1	2782.17	121.855	0.0437983	4.04373e-07	Down	TUBB1	Tubulin beta-1 chain	GO:0000226,GO:0000278,GO:0003924,GO:0005200,GO:0005525,GO:0005737,GO:0005773,GO:0005874,GO:0007017,GO:0009416,GO:0009826	microtubule cytoskeleton organization|mitotic cell cycle|GTPase activity|structural constituent of cytoskeleton|GTP binding|cytoplasm|vacuole|microtubule|microtubule-based process|response to light stimulus|unidimensional cell growth
Cse_sc001986.1_g090.1	63.2583	18.1677	0.287199	0.0001039	Down
Cse_sc001987.1_g080.1	32.6287	7.99893	0.24515	0.000605053	Down	OPR1	12-oxophytodienoate reductase 1	GO:0005737,GO:0010181,GO:0016629,GO:0031408	cytoplasm|FMN binding|12-oxophytodienoate reductase activity|oxylipin biosynthetic process
Cse_sc001988.1_g010.1	17.9613	4.14977	0.23104	0.00376048	Down	HEMA1	Glutamyl-tRNA reductase 1, chloroplastic	GO:0006782,GO:0008883,GO:0009507,GO:0015995,GO:0050661	protoporphyrinogen IX biosynthetic process|glutamyl-tRNA reductase activity|chloroplast|chlorophyll biosynthetic process|NADP binding
Cse_sc001989.1_g050.1	29.3432	12.9671	0.44191	0.030333	Down	PMA4	Plasma membrane ATPase 4	GO:0005524,GO:0005886,GO:0008553,GO:0016021,GO:0046872,GO:0120029	ATP binding|plasma membrane|proton-exporting ATPase activity, phosphorylative mechanism|integral component of membrane|metal ion binding|proton export across plasma membrane
Cse_sc001990.1_g060.1	5.82047	0.755446	0.129791	0.033013	Down	At4g15060	Putative F-box/LRR-repeat protein At4g15060
Cse_sc001990.1_g090.1	270.936	103.313	0.381319	3.75703e-05	Down	IAA6	Auxin-induced protein IAA6	GO:0005634,GO:0006355,GO:0009734	nucleus|regulation of transcription, DNA-templated|auxin-activated signaling pathway
Cse_sc001992.1_g010.1	2.57706	15.8161	6.13727	0.0197403	Up	PIX13	Probable serine/threonine-protein kinase PIX13
Cse_sc001992.1_g030.1	33.3652	177.513	5.32031	2.78836e-10	Up	PIX13	Probable serine/threonine-protein kinase PIX13
Cse_sc001993.1_g010.1	6.0144	0	0	0.0177198	Down	CYP79A2	Phenylalanine N-monooxygenase	GO:0004497,GO:0005506,GO:0005789,GO:0016021,GO:0016705,GO:0020037	monooxygenase activity|iron ion binding|endoplasmic reticulum membrane|integral component of membrane|oxidoreductase activity, acting on paired donors, with incorporation or reduction of molecular oxygen|heme binding
Cse_sc001994.1_g020.1	31.7375	154.563	4.87005	2.52165e-09	Up
Cse_sc002003.1_g050.1	137.645	1463.88	10.6352	2.78587e-19	Up	OPT4	Oligopeptide transporter 4	GO:0005887,GO:0015031,GO:0016020,GO:0035673,GO:0080167	integral component of plasma membrane|protein transport|membrane|oligopeptide transmembrane transporter activity|response to karrikin
Cse_sc002006.1_g070.1	2544.31	105.4	0.0414257	5.05169e-32	Down	LTL1	GDSL esterase/lipase LTL1	GO:0005576,GO:0009751,GO:0010226,GO:0016042,GO:0016788,GO:0042538	extracellular region|response to salicylic acid|response to lithium ion|lipid catabolic process|hydrolase activity, acting on ester bonds|hyperosmotic salinity response
Cse_sc002006.1_g100.1	32.6225	0.965918	0.029609	8.69121e-10	Down	At3g06240	F-box/kelch-repeat protein At3g06240
Cse_sc002006.1_g110.1	265.187	63.204	0.238338	2.11481e-08	Down	DET2	Steroid 5-alpha-reductase DET2	GO:0003865,GO:0005737,GO:0016021,GO:0016132,GO:0047751,GO:0050213,GO:0055114,GO:0090377,GO:0090378	3-oxo-5-alpha-steroid 4-dehydrogenase activity|cytoplasm|integral component of membrane|brassinosteroid biosynthetic process|cholestenone 5-alpha-reductase activity|progesterone 5-alpha-reductase activity|oxidation-reduction process|seed trichome initiation|seed trichome elongation
Cse_sc002014.1_g040.1	1373.01	167.876	0.122269	4.95439e-07	Down	SFH3	Phosphatidylinositol/phosphatidylcholine transfer protein SFH3	GO:0000139,GO:0005886,GO:0009908,GO:0015031	Golgi membrane|plasma membrane|flower development|protein transport
Cse_sc002016.1_g010.1	24.4114	3.12977	0.128209	3.61903e-05	Down
Cse_sc002016.1_g020.1	30.482	61.9454	2.0322	0.0184723	Up
Cse_sc002022.1_g030.1	2280.79	235.822	0.103395	1.80153e-22	Down	CKX1	Cytokinin dehydrogenase 1	GO:0005773,GO:0009823,GO:0019139,GO:0048507,GO:0071949	vacuole|cytokinin catabolic process|cytokinin dehydrogenase activity|meristem development|FAD binding
Cse_sc002028.1_g030.1	0	11.2295	Inf	2.51778e-05	Up	ATL46	RING-H2 finger protein ATL46	GO:0016021,GO:0016567,GO:0016740,GO:0031625,GO:0046872	integral component of membrane|protein ubiquitination|transferase activity|ubiquitin protein ligase binding|metal ion binding
Cse_sc002028.1_g040.1	28.7004	1.0397	0.0362258	8.4559e-09	Down	At1g60070	AP-1 complex subunit gamma-2	GO:0006886,GO:0016192,GO:0030121	intracellular protein transport|vesicle-mediated transport|AP-1 adaptor complex
Cse_sc002028.1_g050.1	3.52315	0	0	0.0433031	Down
Cse_sc002028.1_g060.1	144.227	32.0536	0.222244	2.63651e-08	Down
Cse_sc002031.1_g060.1	13.3402	0.643946	0.0482711	0.00010887	Down
Cse_sc002036.1_g010.1	163.204	7.481	0.0458383	0.000116503	Down	NHX2	Sodium/hydrogen exchanger 2	GO:0005774,GO:0005886,GO:0009651,GO:0010107,GO:0015385,GO:0015386,GO:0016021,GO:0051453,GO:0055075,GO:0071805,GO:0090333,GO:0098719	vacuolar membrane|plasma membrane|response to salt stress|potassium ion import|sodium:proton antiporter activity|potassium:proton antiporter activity|integral component of membrane|regulation of intracellular pH|potassium ion homeostasis|potassium ion transmembrane transport|regulation of stomatal closure|sodium ion import across plasma membrane
Cse_sc002045.1_g030.1	981.9	5557.57	5.66002	1.21372e-14	Up	SULTR3	Probable sulfate transporter 3.5	GO:0008271,GO:0015116,GO:0015293,GO:0015301,GO:0016021	secondary active sulfate transmembrane transporter activity|sulfate transmembrane transporter activity|symporter activity|anion:anion antiporter activity|integral component of membrane
Cse_sc002047.1_g010.1	4.7564	0	0	0.0126754	Down
Cse_sc002049.1_g040.1	500.721	1227.91	2.45228	3.74435e-05	Up	PSR2	Probable phosphatase PSR2	GO:0004721,GO:0005886,GO:0006470,GO:0009408,GO:0009651,GO:0071472	phosphoprotein phosphatase activity|plasma membrane|protein dephosphorylation|response to heat|response to salt stress|cellular response to salt stress
Cse_sc002050.1_g010.1	15.6051	3.35827	0.215203	0.00523315	Down
Cse_sc002052.1_g010.1	14.1159	41.2811	2.92444	0.0352164	Up	SYNC2	Asparagine--tRNA ligase, cytoplasmic 2	GO:0004816,GO:0005524,GO:0005739,GO:0005829,GO:0006421,GO:0009507	asparagine-tRNA ligase activity|ATP binding|mitochondrion|cytosol|asparaginyl-tRNA aminoacylation|chloroplast
Cse_sc002053.1_g010.1	13.4421	4.05797	0.301885	0.0304529	Down		Serine hydroxymethyltransferase, mitochondrial	GO:0004372,GO:0005739,GO:0019264,GO:0030170,GO:0035999	glycine hydroxymethyltransferase activity|mitochondrion|glycine biosynthetic process from serine|pyridoxal phosphate binding|tetrahydrofolate interconversion
Cse_sc002066.1_g010.1	6.5986	0	0	0.00209906	Down	At1g65750	Putative ribonuclease H protein At1g65750	GO:0003676,GO:0004523,GO:0046872	nucleic acid binding|RNA-DNA hybrid ribonuclease activity|metal ion binding
Cse_sc002068.1_g030.1	3822.03	988.14	0.258538	8.03522e-10	Down	POT2	Potassium transporter 2	GO:0005886,GO:0006813,GO:0015079,GO:0016020,GO:0016021	plasma membrane|potassium ion transport|potassium ion transmembrane transporter activity|membrane|integral component of membrane
Cse_sc002070.1_g010.1	30.2085	0.330986	0.0109567	0.00158595	Down	SRP	Stress-related protein
Cse_sc002070.1_g040.1	191.499	28.1701	0.147103	5.01627e-06	Down	GH3.9	Putative indole-3-acetic acid-amido synthetase GH3.9	GO:0009941,GO:0016874	chloroplast envelope|ligase activity
Cse_sc002077.1_g030.1	243.899	507.349	2.08015	0.00109996	Up	At1g52740	Probable histone H2A variant 3	GO:0000786,GO:0000790,GO:0003677,GO:0005773,GO:0006325,GO:0009266,GO:0042742,GO:0046982	nucleosome|nuclear chromatin|DNA binding|vacuole|chromatin organization|response to temperature stimulus|defense response to bacterium|protein heterodimerization activity
Cse_sc002077.1_g040.1	39.3967	84.9888	2.15726	0.00622103	Up	PCMP-E9	Pentatricopeptide repeat-containing protein At2g44880
Cse_sc002078.1_g070.1	489.512	1017.12	2.07783	0.000805006	Up	DELTA-OAT	Ornithine aminotransferase, mitochondrial	GO:0004587,GO:0005737,GO:0005739,GO:0005759,GO:0006561,GO:0006593,GO:0006979,GO:0008270,GO:0009408,GO:0009413,GO:0009414,GO:0009626,GO:0009651,GO:0009733,GO:0009737,GO:0009741,GO:0009753,GO:0009816,GO:0010121,GO:0019544,GO:0030170,GO:0042538,GO:0051646	ornithine-oxo-acid transaminase activity|cytoplasm|mitochondrion|mitochondrial matrix|proline biosynthetic process|ornithine catabolic process|response to oxidative stress|zinc ion binding|response to heat|response to flooding|response to water deprivation|plant-type hypersensitive response|response to salt stress|response to auxin|response to abscisic acid|response to brassinosteroid|response to…
Cse_sc002088.1_g020.1	14.4478	0.70871	0.0490532	5.00513e-05	Down	ROPGAP2	Rho GTPase-activating protein 2	GO:0005096,GO:0007165	GTPase activator activity|signal transduction
Cse_sc002091.1_g060.1	404.555	1027.7	2.54033	2.24036e-05	Up	At2g28370	CASP-like protein 5A2	GO:0005886,GO:0016021	plasma membrane|integral component of membrane
Cse_sc002091.1_g080.1	173.546	403.168	2.32311	0.000469924	Up
Cse_sc002091.1_g140.1	1709.05	11956.8	6.99618	0.000371157	Up	PIP2-2	Probable aquaporin PIP2-2	GO:0005773,GO:0005886,GO:0009414,GO:0009506,GO:0015250,GO:0016021	vacuole|plasma membrane|response to water deprivation|plasmodesma|water channel activity|integral component of membrane
Cse_sc002091.1_g150.1	44.4972	11.4168	0.256573	0.0017456	Down
Cse_sc002095.1_g100.1	535.434	2565.74	4.79189	0.000134814	Up	ALA1	Phospholipid-transporting ATPase 1	GO:0000287,GO:0004012,GO:0005524,GO:0005789,GO:0005886,GO:0016020,GO:0016021,GO:0045332	magnesium ion binding|phospholipid-translocating ATPase activity|ATP binding|endoplasmic reticulum membrane|plasma membrane|membrane|integral component of membrane|phospholipid translocation
Cse_sc002096.1_g040.1	208.941	944.283	4.51937	2.67351e-11	Up		Germacrene A hydroxylase	GO:0004497,GO:0005506,GO:0005789,GO:0016021,GO:0016705,GO:0020037	monooxygenase activity|iron ion binding|endoplasmic reticulum membrane|integral component of membrane|oxidoreductase activity, acting on paired donors, with incorporation or reduction of molecular oxygen|heme binding
Cse_sc002098.1_g070.1	58.7268	117.672	2.00373	0.00804815	Up	RPPL1	Putative disease resistance RPP13-like protein 1
Cse_sc002099.1_g030.1	17.6739	0	0	1.10478e-07	Down	LBD36	LOB domain-containing protein 36	GO:0006355,GO:0009954,GO:0009965,GO:0048441	regulation of transcription, DNA-templated|proximal/distal pattern formation|leaf morphogenesis|petal development
Cse_sc002101.1_g040.1	35.7655	7.69499	0.215151	8.39161e-05	Down
Cse_sc002103.1_g050.1	30.4315	4.99869	0.16426	2.49401e-05	Down	EDA2	Probable serine protease EDA2	GO:0005576,GO:0005773,GO:0006508,GO:0008236,GO:0008239,GO:0009561	extracellular region|vacuole|proteolysis|serine-type peptidase activity|dipeptidyl-peptidase activity|megagametogenesis
Cse_sc002103.1_g060.1	184.163	28.7334	0.156022	3.00287e-06	Down	EDA2	Probable serine protease EDA2	GO:0005576,GO:0005773,GO:0006508,GO:0008236,GO:0008239,GO:0009561	extracellular region|vacuole|proteolysis|serine-type peptidase activity|dipeptidyl-peptidase activity|megagametogenesis
Cse_sc002106.1_g040.1	178.595	25.5604	0.143119	0.000402981	Down	MYB74	Transcription factor MYB74	GO:0003700,GO:0005634,GO:0009651,GO:0009723,GO:0009737,GO:0009753,GO:0030154,GO:0043565,GO:0044212	DNA-binding transcription factor activity|nucleus|response to salt stress|response to ethylene|response to abscisic acid|response to jasmonic acid|cell differentiation|sequence-specific DNA binding|transcription regulatory region DNA binding
Cse_sc002111.1_g020.1	28.3944	2.31857	0.0816559	0.00233786	Down	CASC125	(E)-beta-farnesene synthase	GO:0000287,GO:0005737,GO:0010333,GO:0016114	magnesium ion binding|cytoplasm|terpene synthase activity|terpenoid biosynthetic process
Cse_sc002116.1_g050.1	6.20088	0.699696	0.112838	0.0259871	Down
Cse_sc002118.1_g020.1	59.8495	29.2944	0.489468	0.0136184	Down
Cse_sc002120.1_g040.1	89.3184	0.330986	0.00370569	1.43039e-11	Down	EXO70B1	Exocyst complex component EXO70B1	GO:0000145,GO:0005829,GO:0005886,GO:0006887,GO:0009414,GO:0009789,GO:0012505,GO:0042742,GO:0045335,GO:0050832,GO:0070062,GO:0090333	exocyst|cytosol|plasma membrane|exocytosis|response to water deprivation|positive regulation of abscisic acid-activated signaling pathway|endomembrane system|defense response to bacterium|phagocytic vesicle|defense response to fungus|extracellular exosome|regulation of stomatal closure
Cse_sc002120.1_g060.1	836.969	42.4102	0.0506712	5.73003e-13	Down	SWEET15	Bidirectional sugar transporter SWEET15	GO:0005886,GO:0016021,GO:0051119	plasma membrane|integral component of membrane|sugar transmembrane transporter activity
Cse_sc002127.1_g080.1	0	3.73599	Inf	0.029586	Up
Cse_sc002131.1_g040.1	155.991	9.98837	0.0640319	7.21029e-12	Down
Cse_sc002133.1_g030.1	7.40915	0.321973	0.0434561	0.00394212	Down	COX6B-1	Cytochrome c oxidase subunit 6b-1	GO:0005507,GO:0005739,GO:0009507,GO:0009535,GO:0009579,GO:0009651	copper ion binding|mitochondrion|chloroplast|chloroplast thylakoid membrane|thylakoid|response to salt stress
Cse_sc002136.1_g040.1	7.12199	0.661973	0.0929478	0.0129148	Down	At1g63410	Protein LURP-one-related 4
Cse_sc002136.1_g050.1	147.777	56.3984	0.381645	0.000205076	Down
Cse_sc002137.1_g010.1	90.1318	275.415	3.05569	2.11323e-06	Up	CML16	Probable calcium-binding protein CML16	GO:0005509	calcium ion binding
Cse_sc002138.1_g020.1	594.142	191.043	0.321544	7.64674e-06	Down	CHLH	Magnesium-chelatase subunit ChlH, chloroplastic	GO:0005524,GO:0005739,GO:0009507,GO:0009570,GO:0009706,GO:0010007,GO:0015979,GO:0015995,GO:0016851	ATP binding|mitochondrion|chloroplast|chloroplast stroma|chloroplast inner membrane|magnesium chelatase complex|photosynthesis|chlorophyll biosynthetic process|magnesium chelatase activity
Cse_sc002142.1_g060.1	294.551	114.924	0.390166	5.30865e-05	Down	SCAB3	Stomatal closure-related actin-binding protein 3	GO:0003779,GO:0005737,GO:0005856,GO:0005886,GO:0007623	actin binding|cytoplasm|cytoskeleton|plasma membrane|circadian rhythm
Cse_sc002144.1_g040.1	55.5631	997.533	17.9532	7.58707e-05	Up	CAO	Chlorophyllide a oxygenase, chloroplastic	GO:0005506,GO:0009507,GO:0009535,GO:0009706,GO:0010277,GO:0015995,GO:0042651,GO:0051537	iron ion binding|chloroplast|chloroplast thylakoid membrane|chloroplast inner membrane|chlorophyllide a oxygenase [overall] activity|chlorophyll biosynthetic process|thylakoid membrane|2 iron, 2 sulfur cluster binding
Cse_sc002148.1_g030.1	30.9891	98.2337	3.16995	0.000134654	Up	At1g80440	F-box/kelch-repeat protein At1g80440	GO:0005829,GO:0019005,GO:0080037,GO:2000762	cytosol|SCF ubiquitin ligase complex|negative regulation of cytokinin-activated signaling pathway|regulation of phenylpropanoid metabolic process
Cse_sc002148.1_g050.1	0	3.90874	Inf	0.0299396	Up
Cse_sc002148.1_g070.1	3.49816	0	0	0.0437518	Down	At1g12663	Thionin-like protein 2	GO:0005576,GO:0006952	extracellular region|defense response
Cse_sc002150.1_g070.1	586.51	2142.43	3.65284	3.88148e-09	Up
Cse_sc002151.1_g040.1	14.659	1.40841	0.0960779	0.000292672	Down	PUB26	U-box domain-containing protein 26	GO:0009814,GO:0016567,GO:0061630	defense response, incompatible interaction|protein ubiquitination|ubiquitin protein ligase activity
Cse_sc002153.1_g030.1	44.1901	6.42512	0.145397	0.0487613	Down
Cse_sc002153.1_g070.1	54.9293	0	0	2.86535e-18	Down	ZIFL1	Protein ZINC INDUCED FACILITATOR-LIKE 1	GO:0005886,GO:0009414,GO:0009630,GO:0009705,GO:0010540,GO:0016021,GO:0022821,GO:0048364,GO:0080167,GO:0090333	plasma membrane|response to water deprivation|gravitropism|plant-type vacuole membrane|basipetal auxin transport|integral component of membrane|potassium ion antiporter activity|root development|response to karrikin|regulation of stomatal closure
Cse_sc002156.1_g120.1	117.72	45.221	0.38414	0.000349425	Down		Enoyl-[acyl-carrier-protein] reductase [NADH], chloroplastic	GO:0004318,GO:0006633,GO:0009507,GO:0016631	enoyl-[acyl-carrier-protein] reductase (NADH) activity|fatty acid biosynthetic process|chloroplast|enoyl-[acyl-carrier-protein] reductase activity
Cse_sc002156.1_g140.1	440.012	11.5138	0.026167	1.67766e-07	Down	NPF7.1	Protein NRT1/ PTR FAMILY 7.1	GO:0005886,GO:0010167,GO:0015112,GO:0016021	plasma membrane|response to nitrate|nitrate transmembrane transporter activity|integral component of membrane
Cse_sc002157.1_g050.1	803.098	2.30956	0.00287581	2.9064e-55	Down	CXE2	Probable carboxylesterase 2	GO:0052689	carboxylic ester hydrolase activity
Cse_sc002162.1_g020.1	80.8412	6.99011	0.0864672	2.03325e-09	Down	UFC	Protein UPSTREAM OF FLC
Cse_sc002163.1_g020.1	40.654	17.2534	0.424396	0.0126705	Down		Mannose/glucose-specific lectin (Fragment)	GO:0000771,GO:0005536,GO:0005537	agglutination involved in conjugation|glucose binding|mannose binding
Cse_sc002169.1_g090.1	40.0482	4.50947	0.112601	1.71228e-07	Down	At5g48800	BTB/POZ domain-containing protein At5g48800	GO:0005886,GO:0016567	plasma membrane|protein ubiquitination
Cse_sc002169.1_g120.1	90.7841	22.7543	0.250642	2.32819e-06	Down	PRT1	E3 ubiquitin-protein ligase PRT1	GO:0005737,GO:0008270,GO:0043161,GO:0050832,GO:0061630,GO:0071596	cytoplasm|zinc ion binding|proteasome-mediated ubiquitin-dependent protein catabolic process|defense response to fungus|ubiquitin protein ligase activity|ubiquitin-dependent protein catabolic process via the N-end rule pathway
Cse_sc002170.1_g040.1	203.205	584.828	2.87802	3.27151e-06	Up	At1g55760	BTB/POZ domain-containing protein At1g55760	GO:0016567	protein ubiquitination
Cse_sc002171.1_g020.1	885.716	396.542	0.447708	0.000255765	Down	At1g19940	Endoglucanase 2	GO:0005576,GO:0008810,GO:0030245,GO:0071555	extracellular region|cellulase activity|cellulose catabolic process|cell wall organization
Cse_sc002174.1_g010.1	171.206	662.665	3.87057	4.54817e-09	Up	PGL1	Probable 6-phosphogluconolactonase 1	GO:0005829,GO:0005975,GO:0009051,GO:0017057	cytosol|carbohydrate metabolic process|pentose-phosphate shunt, oxidative branch|6-phosphogluconolactonase activity
Cse_sc002177.1_g060.1	14.7176	1.83287	0.124535	0.00060472	Down	RE1	Retrovirus-related Pol polyprotein from transposon RE1	GO:0000943,GO:0003676,GO:0003964,GO:0004190,GO:0004519,GO:0006310,GO:0015074,GO:0046872	retrotransposon nucleocapsid|nucleic acid binding|RNA-directed DNA polymerase activity|aspartic-type endopeptidase activity|endonuclease activity|DNA recombination|DNA integration|metal ion binding
Cse_sc002179.1_g010.1	28.6502	81.832	2.85625	0.0107562	Up
Cse_sc002185.1_g020.1	37.3524	1.61888	0.0433406	2.4038e-06	Down
Cse_sc002185.1_g070.1	116.969	262.085	2.24064	0.00158834	Up	CYP71D55	Premnaspirodiene oxygenase	GO:0004497,GO:0005506,GO:0016021,GO:0016705,GO:0020037	monooxygenase activity|iron ion binding|integral component of membrane|oxidoreductase activity, acting on paired donors, with incorporation or reduction of molecular oxygen|heme binding
Cse_sc002189.1_g040.1	21.3402	328.326	15.3853	7.23586e-16	Up	HSFB3	Heat stress transcription factor B-3	GO:0000978,GO:0003700,GO:0005634,GO:0005737,GO:0034605,GO:0043565,GO:0046686,GO:0061408	RNA polymerase II proximal promoter sequence-specific DNA binding|DNA-binding transcription factor activity|nucleus|cytoplasm|cellular response to heat|sequence-specific DNA binding|response to cadmium ion|positive regulation of transcription from RNA polymerase II promoter in response to heat stress
Cse_sc002191.1_g020.1	38.5691	0.377723	0.00979341	0.000140471	Down	ZAT3	Zinc finger protein ZAT3	GO:0003676,GO:0003700,GO:0005634,GO:0006355,GO:0046872,GO:0048235	nucleic acid binding|DNA-binding transcription factor activity|nucleus|regulation of transcription, DNA-templated|metal ion binding|pollen sperm cell differentiation
Cse_sc002194.1_g010.1	282.268	11.645	0.041255	3.66883e-26	Down
Cse_sc002195.1_g040.1	466.666	208.928	0.447703	0.000332513	Down	GLR3.6	Glutamate receptor 3.6	GO:0004970,GO:0005262,GO:0005622,GO:0005886,GO:0006816,GO:0007267,GO:0008066,GO:0009611,GO:0009864,GO:0016021,GO:0019722,GO:0071230	ionotropic glutamate receptor activity|calcium channel activity|intracellular|plasma membrane|calcium ion transport|cell-cell signaling|glutamate receptor activity|response to wounding|induced systemic resistance, jasmonic acid mediated signaling pathway|integral component of membrane|calcium-mediated signaling|cellular response to amino acid stimulus
Cse_sc002195.1_g050.1	863.193	2027.49	2.34883	0.00329216	Up	RRP44A	Exosome complex exonuclease RRP44 homolog A	GO:0000175,GO:0000176,GO:0000177,GO:0000178,GO:0003723,GO:0004519,GO:0006364,GO:0006401,GO:0016075,GO:0046872	3'-5'-exoribonuclease activity|nuclear exosome (RNase complex)|cytoplasmic exosome (RNase complex)|exosome (RNase complex)|RNA binding|endonuclease activity|rRNA processing|RNA catabolic process|rRNA catabolic process|metal ion binding
Cse_sc002196.1_g010.1	50.8793	22.2522	0.437353	0.00836764	Down	RLP6	Receptor-like protein 6	GO:0005886,GO:0016020,GO:0016021	plasma membrane|membrane|integral component of membrane
Cse_sc002200.1_g050.1	387.726	881.115	2.27252	0.0244798	Up	FRS5	Protein FAR1-RELATED SEQUENCE 5	GO:0005634,GO:0006355,GO:0008270	nucleus|regulation of transcription, DNA-templated|zinc ion binding
Cse_sc002203.1_g020.1	0	46.8157	Inf	5.808e-08	Up	UGT76B1	UDP-glycosyltransferase 76B1	GO:0002239,GO:0006952,GO:0008194,GO:0010150,GO:0043231,GO:0046527,GO:0052640,GO:0080043,GO:0080044	response to oomycetes|defense response|UDP-glycosyltransferase activity|leaf senescence|intracellular membrane-bounded organelle|glucosyltransferase activity|salicylic acid glucosyltransferase (glucoside-forming) activity|quercetin 3-O-glucosyltransferase activity|quercetin 7-O-glucosyltransferase activity
Cse_sc002203.1_g030.1	0.32946	23.191	70.3908	0.00122742	Up	UGT76G1	UDP-glycosyltransferase 76G1	GO:0035251	UDP-glucosyltransferase activity
Cse_sc002203.1_g040.1	34.2876	247.214	7.21	2.74009e-14	Up	UGT76G1	UDP-glycosyltransferase 76G1	GO:0035251	UDP-glucosyltransferase activity
Cse_sc002205.1_g030.1	765.759	2282.14	2.98023	6.99435e-07	Up
Cse_sc002207.1_g060.1	73.5364	28.638	0.389439	0.00103558	Down
Cse_sc002207.1_g080.1	656.43	9.07635	0.0138268	1.14349e-45	Down	HPD	4-hydroxyphenylpyruvate dioxygenase	GO:0003868,GO:0005829,GO:0006559,GO:0006572,GO:0042802,GO:0046872	4-hydroxyphenylpyruvate dioxygenase activity|cytosol|L-phenylalanine catabolic process|tyrosine catabolic process|identical protein binding|metal ion binding
Cse_sc002209.1_g050.1	11.3886	54.9246	4.82275	4.83385e-06	Up	LECRK2	G-type lectin S-receptor-like serine/threonine-protein kinase LECRK2	GO:0004674,GO:0005524,GO:0005886,GO:0006468,GO:0006952,GO:0016021,GO:0030246	protein serine/threonine kinase activity|ATP binding|plasma membrane|protein phosphorylation|defense response|integral component of membrane|carbohydrate binding
Cse_sc002209.1_g100.1	529.831	258.931	0.488705	0.00136382	Down	EFR3	Protein EFR3	GO:0005886,GO:0072659	plasma membrane|protein localization to plasma membrane
Cse_sc002213.1_g060.1	41.7722	18.7267	0.448306	0.0171406	Down	UBP13	Ubiquitin carboxyl-terminal hydrolase 13	GO:0004197,GO:0004843,GO:0005634,GO:0005737,GO:0005829,GO:0006511,GO:0009506,GO:0009867,GO:0016579,GO:0031647	cysteine-type endopeptidase activity|thiol-dependent ubiquitin-specific protease activity|nucleus|cytoplasm|cytosol|ubiquitin-dependent protein catabolic process|plasmodesma|jasmonic acid mediated signaling pathway|protein deubiquitination|regulation of protein stability
Cse_sc002216.1_g020.1	17.9197	0.643946	0.035935	0.000309357	Down	WSD1	O-acyltransferase WSD1	GO:0004144,GO:0005783,GO:0005789,GO:0005886,GO:0010025,GO:0016021,GO:0019432,GO:0047196,GO:0102966,GO:0103095	diacylglycerol O-acyltransferase activity|endoplasmic reticulum|endoplasmic reticulum membrane|plasma membrane|wax biosynthetic process|integral component of membrane|triglyceride biosynthetic process|long-chain-alcohol O-fatty-acyltransferase activity|arachidoyl-CoA:1-dodecanol O-acyltransferase activity|wax ester synthase activity
Cse_sc002216.1_g040.1	3.9706	0	0	0.0250892	Down	WSD1	O-acyltransferase WSD1	GO:0004144,GO:0005783,GO:0005789,GO:0005886,GO:0010025,GO:0016021,GO:0019432,GO:0047196,GO:0102966,GO:0103095	diacylglycerol O-acyltransferase activity|endoplasmic reticulum|endoplasmic reticulum membrane|plasma membrane|wax biosynthetic process|integral component of membrane|triglyceride biosynthetic process|long-chain-alcohol O-fatty-acyltransferase activity|arachidoyl-CoA:1-dodecanol O-acyltransferase activity|wax ester synthase activity
Cse_sc002223.1_g060.1	26.5001	1.98759	0.075003	0.0272849	Down	PRK4	Pollen receptor-like kinase 4	GO:0004672,GO:0005524,GO:0016021,GO:0080092	protein kinase activity|ATP binding|integral component of membrane|regulation of pollen tube growth
Cse_sc002245.1_g020.1	5272.47	269.169	0.0510517	3.86793e-35	Down	PR2	Glucan endo-1,3-beta-glucosidase, acidic isoform GI9	GO:0005615,GO:0005975,GO:0006952,GO:0042973	extracellular space|carbohydrate metabolic process|defense response|glucan endo-1,3-beta-D-glucosidase activity
Cse_sc002248.1_g020.1	391.801	192.017	0.490087	0.001714	Down	CDC20-1	Cell division cycle 20.1, cofactor of APC complex
Cse_sc002248.1_g030.1	1793.3	181.725	0.101335	2.08841e-22	Down	BRG3	Probable BOI-related E3 ubiquitin-protein ligase 3	GO:0004842,GO:0005634,GO:0006952,GO:0043067,GO:0043161,GO:0046872	ubiquitin-protein transferase activity|nucleus|defense response|regulation of programmed cell death|proteasome-mediated ubiquitin-dependent protein catabolic process|metal ion binding
Cse_sc002248.1_g040.1	111.028	11.2891	0.101678	3.35204e-13	Down	BOI	E3 ubiquitin-protein ligase BOI	GO:0004842,GO:0005634,GO:0009739,GO:0042742,GO:0043067,GO:0043069,GO:0043161,GO:0046872,GO:0050832,GO:2000117	ubiquitin-protein transferase activity|nucleus|response to gibberellin|defense response to bacterium|regulation of programmed cell death|negative regulation of programmed cell death|proteasome-mediated ubiquitin-dependent protein catabolic process|metal ion binding|defense response to fungus|negative regulation of cysteine-type endopeptidase activity
Cse_sc002252.1_g010.1	8.82024	1.37068	0.155402	0.0155668	Down
Cse_sc002252.1_g030.1	16.6014	35.2645	2.12419	0.0325439	Up	N	TMV resistance protein N	GO:0005524,GO:0005737,GO:0007165,GO:0009626,GO:0043531	ATP binding|cytoplasm|signal transduction|plant-type hypersensitive response|ADP binding
Cse_sc002257.1_g030.1	1.90948	28.0337	14.6813	1.76343e-07	Up	At1g62640	3-oxoacyl-[acyl-carrier-protein] synthase III, chloroplastic	GO:0004315,GO:0006633,GO:0009507,GO:0009570,GO:0033818	3-oxoacyl-[acyl-carrier-protein] synthase activity|fatty acid biosynthetic process|chloroplast|chloroplast stroma|beta-ketoacyl-acyl-carrier-protein synthase III activity
Cse_sc002258.1_g050.1	28.9938	1.28789	0.0444196	0.00133455	Down	PAP27	Probable inactive purple acid phosphatase 27	GO:0003993,GO:0005576,GO:0046872	acid phosphatase activity|extracellular region|metal ion binding
Cse_sc002260.1_g060.1	27.0497	5.90534	0.218315	0.0472064	Down
Cse_sc002261.1_g060.1	550.002	1160.76	2.11047	0.043222	Up	CAR4	Protein C2-DOMAIN ABA-RELATED 4	GO:0005096,GO:0005543,GO:0005634,GO:0005829,GO:0005886,GO:0006952,GO:0009651,GO:0009738,GO:0009789,GO:0043547,GO:0046872,GO:1901002,GO:1902479	GTPase activator activity|phospholipid binding|nucleus|cytosol|plasma membrane|defense response|response to salt stress|abscisic acid-activated signaling pathway|positive regulation of abscisic acid-activated signaling pathway|positive regulation of GTPase activity|metal ion binding|positive regulation of response to salt stress|positive regulation of defense response to bacterium, incompatible i…
Cse_sc002266.1_g010.1	73.1169	4.75216	0.0649941	3.90683e-10	Down	HTH	Protein HOTHEAD	GO:0005576,GO:0007267,GO:0009553,GO:0010430,GO:0016614,GO:0046593,GO:0050660	extracellular region|cell-cell signaling|embryo sac development|fatty acid omega-oxidation|oxidoreductase activity, acting on CH-OH group of donors|mandelonitrile lyase activity|flavin adenine dinucleotide binding
Cse_sc002267.1_g040.1	17.0068	1.67463	0.0984683	0.00310113	Down	PIP2-1	Aquaporin PIP2-1	GO:0005773,GO:0005886,GO:0009414,GO:0009506,GO:0015250,GO:0016021,GO:0032991,GO:0051289,GO:0051290	vacuole|plasma membrane|response to water deprivation|plasmodesma|water channel activity|integral component of membrane|protein-containing complex|protein homotetramerization|protein heterotetramerization
Cse_sc002267.1_g090.1	17.0746	1.9769	0.115781	0.000268812	Down	At3g26920	F-box/FBD/LRR-repeat protein At3g26920
Cse_sc002268.1_g010.1	576.691	277.709	0.481557	0.00155618	Down	PI206	Disease resistance response protein 206	GO:0006952,GO:0009607,GO:0048046	defense response|response to biotic stimulus|apoplast
Cse_sc002270.1_g010.1	1222.42	50.3093	0.0411556	6.08417e-11	Down
Cse_sc002276.1_g040.1	4018	1963.85	0.488763	0.000680124	Down	LHCB5	Chlorophyll a-b binding protein CP26, chloroplastic	GO:0009416,GO:0009507,GO:0009517,GO:0009522,GO:0009534,GO:0009535,GO:0009579,GO:0009637,GO:0009768,GO:0009783,GO:0010114,GO:0010196,GO:0010207,GO:0010218,GO:0010287,GO:0015979,GO:0016020,GO:0016021,GO:0016168,GO:0018298,GO:0019904,GO:0042651,GO:0046872	response to light stimulus|chloroplast|PSII associated light-harvesting complex II|photosystem I|chloroplast thylakoid|chloroplast thylakoid membrane|thylakoid|response to blue light|photosynthesis, light harvesting in photosystem I|photosystem II antenna complex|response to red light|nonphotochemical quenching|photosystem II assembly|response to far red light|plastoglobule|photosynthesis|membran…
Cse_sc002277.1_g010.1	9.09997	0	0	0.000238785	Down	IPT5	Adenylate isopentenyltransferase 5, chloroplastic	GO:0005524,GO:0005739,GO:0006400,GO:0009507,GO:0009536,GO:0009691,GO:0009824,GO:0009860,GO:0052381,GO:0052622,GO:0052623	ATP binding|mitochondrion|tRNA modification|chloroplast|plastid|cytokinin biosynthetic process|AMP dimethylallyltransferase activity|pollen tube growth|tRNA dimethylallyltransferase activity|ATP dimethylallyltransferase activity|ADP dimethylallyltransferase activity
Cse_sc002277.1_g020.1	64.744	0.661973	0.0102245	0.000728189	Down	PRA1E	PRA1 family protein E	GO:0005783,GO:0005794,GO:0010008,GO:0016021,GO:0016192	endoplasmic reticulum|Golgi apparatus|endosome membrane|integral component of membrane|vesicle-mediated transport
Cse_sc002278.1_g010.1	141.002	5.26491	0.0373394	3.96624e-09	Down	SGR2	Phospholipase SGR2	GO:0004620,GO:0005773,GO:0008970,GO:0009506,GO:0009590,GO:0009660,GO:0009705,GO:0009959,GO:0016042,GO:0046872	phospholipase activity|vacuole|phospholipase A1 activity|plasmodesma|detection of gravity|amyloplast organization|plant-type vacuole membrane|negative gravitropism|lipid catabolic process|metal ion binding
Cse_sc002278.1_g030.1	204.292	93.1089	0.455764	0.00123353	Down	LUG	Transcriptional corepressor LEUNIG	GO:0001077,GO:0001666,GO:0005634,GO:0006974,GO:0006979,GO:0009414,GO:0009611,GO:0009617,GO:0009620,GO:0009624,GO:0009733,GO:0009908,GO:0009909,GO:0009944,GO:0010073,GO:0010272,GO:0010393,GO:0030154,GO:0045892,GO:0045995,GO:0046898,GO:0048359,GO:0051512,GO:0071217,GO:0080001,GO:1902074,GO:1902183,GO:2000024	proximal promoter DNA-binding transcription activator activity, RNA polymerase II-specific|response to hypoxia|nucleus|cellular response to DNA damage stimulus|response to oxidative stress|response to water deprivation|response to wounding|response to bacterium|response to fungus|response to nematode|response to auxin|flower development|regulation of flower development|polarity specification of a…
Cse_sc002278.1_g040.1	30.3482	0.965918	0.0318279	3.987e-09	Down
Cse_sc002280.1_g050.1	5.40764	0	0	0.00681783	Down
Cse_sc002281.1_g020.1	31.1854	0.321973	0.0103245	6.29256e-11	Down
Cse_sc002283.1_g040.1	227.95	559.502	2.45449	0.00596486	Up	EBF2	EIN3-binding F-box protein 2	GO:0005634,GO:0006511,GO:0009723,GO:0009873,GO:0010105,GO:0016567,GO:0019005,GO:0031146	nucleus|ubiquitin-dependent protein catabolic process|response to ethylene|ethylene-activated signaling pathway|negative regulation of ethylene-activated signaling pathway|protein ubiquitination|SCF ubiquitin ligase complex|SCF-dependent proteasomal ubiquitin-dependent protein catabolic process
Cse_sc002288.1_g040.1	18.0654	5.79736	0.32091	0.0205689	Down	PKP1	Plastidial pyruvate kinase 1, chloroplastic	GO:0000287,GO:0004743,GO:0005524,GO:0005737,GO:0006096,GO:0006629,GO:0009507,GO:0009570,GO:0010431,GO:0016301,GO:0030955,GO:0032869,GO:0046686	magnesium ion binding|pyruvate kinase activity|ATP binding|cytoplasm|glycolytic process|lipid metabolic process|chloroplast|chloroplast stroma|seed maturation|kinase activity|potassium ion binding|cellular response to insulin stimulus|response to cadmium ion
Cse_sc002289.1_g020.1	8.0008	0	0	0.000669492	Down	At3g47200	UPF0481 protein At3g47200	GO:0005886,GO:0016021	plasma membrane|integral component of membrane
Cse_sc002294.1_g040.1	18.5964	4.82243	0.25932	0.00645426	Down	At3g16210	Putative F-box protein At3g16210
Cse_sc002294.1_g050.1	81.4543	185.974	2.28317	0.0303739	Up	At4g36750	Probable NAD(P)H dehydrogenase (quinone) FQR1-like 2	GO:0003955,GO:0005886,GO:0010181,GO:0055114	NAD(P)H dehydrogenase (quinone) activity|plasma membrane|FMN binding|oxidation-reduction process
Cse_sc002301.1_g020.1	46.1289	5.93238	0.128604	0.00511768	Down	YSL6	Probable metal-nicotianamine transporter YSL6	GO:0005774,GO:0016021,GO:0055085	vacuolar membrane|integral component of membrane|transmembrane transport
Cse_sc002304.1_g050.1	2183.97	241.475	0.110567	2.1639e-21	Down
Cse_sc002309.1_g020.1	10.0545	23.384	2.32573	0.0367612	Up	MYB78	Transcription factor MYB78	GO:0003700,GO:0005634,GO:0009651,GO:0009737,GO:0043565,GO:1902074	DNA-binding transcription factor activity|nucleus|response to salt stress|response to abscisic acid|sequence-specific DNA binding|response to salt
Cse_sc002310.1_g090.1	4.35966	0	0	0.0178424	Down	BIC1	Protein BIC1	GO:0005634,GO:0080167	nucleus|response to karrikin
Cse_sc002311.1_g040.1	60.8964	15.6652	0.257244	2.67992e-05	Down	CAC3	Acetyl-coenzyme A carboxylase carboxyl transferase subunit alpha, chloroplastic	GO:0003989,GO:0005524,GO:0006633,GO:0009317,GO:0009507,GO:0009536,GO:0009570,GO:0009706,GO:0009941,GO:0016020,GO:0016740,GO:2001295	acetyl-CoA carboxylase activity|ATP binding|fatty acid biosynthetic process|acetyl-CoA carboxylase complex|chloroplast|plastid|chloroplast stroma|chloroplast inner membrane|chloroplast envelope|membrane|transferase activity|malonyl-CoA biosynthetic process
Cse_sc002317.1_g010.1	290.384	91.1425	0.313869	1.03135e-06	Down	SCPL26	Serine carboxypeptidase-like 26	GO:0004185,GO:0005576,GO:0005773,GO:0051603	serine-type carboxypeptidase activity|extracellular region|vacuole|proteolysis involved in cellular protein catabolic process
Cse_sc002317.1_g040.1	222.238	15.2462	0.0686032	1.46582e-20	Down
Cse_sc002320.1_g040.1	1032.56	2213.36	2.14357	0.000428225	Up	BAK1	BRASSINOSTEROID INSENSITIVE 1-associated receptor kinase 1
Cse_sc002322.1_g070.1	144.855	1044.22	7.20876	2.33296e-17	Up	STP14	Sugar transport protein 14	GO:0005351,GO:0005355,GO:0005886,GO:0005887,GO:0008645	carbohydrate:proton symporter activity|glucose transmembrane transporter activity|plasma membrane|integral component of plasma membrane|hexose transmembrane transport
Cse_sc002324.1_g010.1	50.7349	0.965918	0.0190385	4.88917e-09	Down	FH5	Formin-like protein 5	GO:0003779,GO:0005618,GO:0005737,GO:0009524,GO:0009960,GO:0016021,GO:0030041,GO:0045010,GO:0048317	actin binding|cell wall|cytoplasm|phragmoplast|endosperm development|integral component of membrane|actin filament polymerization|actin nucleation|seed morphogenesis
Cse_sc002325.1_g040.1	71.4583	29.0412	0.406407	0.0143406	Down
Cse_sc002327.1_g070.1	312.768	2518.61	8.05265	3.40339e-19	Up	NRT2.7	High affinity nitrate transporter 2.7	GO:0005886,GO:0009705,GO:0015112,GO:0015706,GO:0016021,GO:0042128,GO:0071249	plasma membrane|plant-type vacuole membrane|nitrate transmembrane transporter activity|nitrate transport|integral component of membrane|nitrate assimilation|cellular response to nitrate
Cse_sc002337.1_g090.1	20.2445	1.32395	0.0653978	7.97711e-06	Down		Ribonucleoside-diphosphate reductase small chain	GO:0004748,GO:0005737,GO:0006260,GO:0009263,GO:0046872	ribonucleoside-diphosphate reductase activity, thioredoxin disulfide as acceptor|cytoplasm|DNA replication|deoxyribonucleotide biosynthetic process|metal ion binding
Cse_sc002345.1_g020.1	48.5195	17.5755	0.362236	0.00219024	Down	At4g06598	Uncharacterized protein At4g06598
Cse_sc002345.1_g030.1	131.574	368.217	2.79855	0.0218331	Up	MLO4	MLO-like protein 4	GO:0005516,GO:0006952,GO:0009607,GO:0016021	calmodulin binding|defense response|response to biotic stimulus|integral component of membrane
Cse_sc002346.1_g010.1	226.548	26.9202	0.118828	4.68055e-15	Down	CYP71B37	Cytochrome P450 71B37	GO:0005506,GO:0016020,GO:0016021,GO:0016709,GO:0020037	iron ion binding|membrane|integral component of membrane|oxidoreductase activity, acting on paired donors, with incorporation or reduction of molecular oxygen, NAD(P)H as one donor, and incorporation of one atom of oxygen|heme binding
Cse_sc002347.1_g010.1	1225.37	163.716	0.133605	6.31898e-07	Down	DCR	BAHD acyltransferase DCR	GO:0005737,GO:0005829,GO:0010090,GO:0010143,GO:0016747,GO:0051179,GO:0090626	cytoplasm|cytosol|trichome morphogenesis|cutin biosynthetic process|transferase activity, transferring acyl groups other than amino-acyl groups|localization|plant epidermis morphogenesis
Cse_sc002347.1_g040.1	15.941	0.661973	0.0415264	0.0002319	Down	KIN10C	Kinesin-like protein KIN-10C	GO:0003777,GO:0005524,GO:0005871,GO:0005874,GO:0007018,GO:0008017,GO:0016887	microtubule motor activity|ATP binding|kinesin complex|microtubule|microtubule-based movement|microtubule binding|ATPase activity
Cse_sc002352.1_g050.1	18.5875	67.8903	3.65246	0.00583297	Up	STY13	Serine/threonine-protein kinase STY13	GO:0004674,GO:0004712,GO:0004713,GO:0005524,GO:0005886,GO:0006468,GO:0010344	protein serine/threonine kinase activity|protein serine/threonine/tyrosine kinase activity|protein tyrosine kinase activity|ATP binding|plasma membrane|protein phosphorylation|seed oilbody biogenesis
Cse_sc002354.1_g020.1	634.159	231.737	0.365424	6.51468e-06	Down	ABCC10	ABC transporter C family member 10	GO:0000325,GO:0005524,GO:0005774,GO:0008559,GO:0016020,GO:0016021,GO:0042626,GO:0055085	plant-type vacuole|ATP binding|vacuolar membrane|xenobiotic transmembrane transporting ATPase activity|membrane|integral component of membrane|ATPase activity, coupled to transmembrane movement of substances|transmembrane transport
Cse_sc002355.1_g030.1	184.201	7.98992	0.0433762	2.04601e-15	Down	EXO70A1	Exocyst complex component EXO70A1	GO:0000145,GO:0005576,GO:0005618,GO:0005829,GO:0005856,GO:0005886,GO:0006887,GO:0009524	exocyst|extracellular region|cell wall|cytosol|cytoskeleton|plasma membrane|exocytosis|phragmoplast
Cse_sc002359.1_g020.1	23.7748	0	0	2.73143e-05	Down		Thioredoxin H-type	GO:0005737,GO:0006662,GO:0015035,GO:0045454	cytoplasm|glycerol ether metabolic process|protein disulfide oxidoreductase activity|cell redox homeostasis
Cse_sc002363.1_g060.1	52.0681	246.121	4.7269	5.45242e-09	Up	QKY	Protein QUIRKY	GO:0005886,GO:0009506,GO:0016021,GO:0099402	plasma membrane|plasmodesma|integral component of membrane|plant organ development
Cse_sc002363.1_g070.1	536.226	238.367	0.444526	0.00649449	Down	INVA	Alkaline/neutral invertase A, mitochondrial	GO:0004575,GO:0005739,GO:0005987,GO:0033926,GO:0042542,GO:0048364	sucrose alpha-glucosidase activity|mitochondrion|sucrose catabolic process|glycopeptide alpha-N-acetylgalactosaminidase activity|response to hydrogen peroxide|root development
Cse_sc002367.1_g010.1	10.9669	0	0	3.70162e-05	Down	JMT	Jasmonate O-methyltransferase	GO:0005634,GO:0005737,GO:0030795,GO:0031408,GO:0102078	nucleus|cytoplasm|jasmonate O-methyltransferase activity|oxylipin biosynthetic process|methyl jasmonate methylesterase activity
Cse_sc002368.1_g010.1	1963.48	932.108	0.474723	0.00498125	Down	HMGS	Hydroxymethylglutaryl-CoA synthase	GO:0004421,GO:0005829,GO:0006084,GO:0009506,GO:0010142,GO:0016126,GO:0019287	hydroxymethylglutaryl-CoA synthase activity|cytosol|acetyl-CoA metabolic process|plasmodesma|farnesyl diphosphate biosynthetic process, mevalonate pathway|sterol biosynthetic process|isopentenyl diphosphate biosynthetic process, mevalonate pathway
Cse_sc002368.1_g030.1	27.4911	2.98956	0.108746	5.39675e-06	Down	PLDGAMMA1	Phospholipase D gamma 1	GO:0004630,GO:0005509,GO:0005546,GO:0005737,GO:0005886,GO:0006643,GO:0006979,GO:0009793,GO:0010044,GO:0016042,GO:0046470,GO:0070290	phospholipase D activity|calcium ion binding|phosphatidylinositol-4,5-bisphosphate binding|cytoplasm|plasma membrane|membrane lipid metabolic process|response to oxidative stress|embryo development ending in seed dormancy|response to aluminum ion|lipid catabolic process|phosphatidylcholine metabolic process|N-acylphosphatidylethanolamine-specific phospholipase D activity
Cse_sc002368.1_g090.1	600.774	1216.43	2.02477	0.00101618	Up	PLDGAMMA1	Phospholipase D gamma 1	GO:0004630,GO:0005509,GO:0005546,GO:0005737,GO:0005886,GO:0006643,GO:0006979,GO:0009793,GO:0010044,GO:0016042,GO:0046470,GO:0070290	phospholipase D activity|calcium ion binding|phosphatidylinositol-4,5-bisphosphate binding|cytoplasm|plasma membrane|membrane lipid metabolic process|response to oxidative stress|embryo development ending in seed dormancy|response to aluminum ion|lipid catabolic process|phosphatidylcholine metabolic process|N-acylphosphatidylethanolamine-specific phospholipase D activity
Cse_sc002368.1_g110.1	6.3614	0.652959	0.102644	0.0252491	Down
[truncated: 6,860 more rows]
