# Supplementary material for: Whole-transcriptome analysis of differentially expressed genes between ray and disc florets and identification of flowering regulatory genes in Chrysanthemum morifolium
Source: Front Plant Sci. 2022 Aug 4;13:947331. doi: 10.3389/fpls.2022.947331 (PMC9388166; doi:10.3389/fpls.2022.947331)
Supplement: Supplementary File 3 — KEGG pathways enriched with expressed genes between disc florets and ray florets of Chrysanthemum morifolium. [file Table_3.XLSX]

## Sheet: Sheet1
gene_name	gene_id	PTG_1_fpkm	PTG_2_fpkm	PTG_3_fpkm	PTG_fpkm	PTS_1_fpkm_fpkm	PTS_2_fpkm	PTS_3_fpkm	PTS_fpkm	PTY_1_fpkm	PTY_2_fpkm	PTY_3_fpkm	PTY_fpkm	symbol	description	GO_id	GO_term	pathway	pathway_description
CmSVP1	Cse_sc013268.1_g040.1	0.1349	1.2487	0.4437	0.6091	0.1996	0.4456	0.0654	0.236867	0.2429	0.5033	0.2565	0.334233	SVP	short vegetative phase family protein [Chrysanthemum x morifolium]	GO:0000977,GO:0000982,GO:0005634,GO:0007275,GO:0008134,GO:0043565,GO:0044212,GO:0045944,GO:0046983	RNA polymerase II regulatory region sequence-specific DNA binding|transcription factor activity, RNA polymerase II proximal promoter sequence-specific DNA binding|nucleus|multicellular organism development|transcription factor binding|sequence-specific DNA binding|transcription regulatory region DNA binding|positive regulation of transcription by RNA polymerase II|protein dimerization activity
CmSVP2	Cse_sc013268.1_g040.2	6.1046	13.6114	8.5005	9.4055	1.3539	1.0483	0.988	1.13007	5.7989	7.0766	9.7662	7.54723	SVP	short vegetative phase family protein [Chrysanthemum x morifolium]	GO:0000977,GO:0000982,GO:0005634,GO:0007275,GO:0008134,GO:0043565,GO:0044212,GO:0045944,GO:0046983	RNA polymerase II regulatory region sequence-specific DNA binding|transcription factor activity, RNA polymerase II proximal promoter sequence-specific DNA binding|nucleus|multicellular organism development|transcription factor binding|sequence-specific DNA binding|transcription regulatory region DNA binding|positive regulation of transcription by RNA polymerase II|protein dimerization activity
CmVRN1	Cse_sc027506.1_g050.1	0.125173	0	0	0.0417243	0	0	0	0	0	0	0.061213	0.0204043	VRN1	B3 domain-containing transcription factor VRN1	GO:0003677,GO:0005654,GO:0009909,GO:0010048,GO:0043565	DNA binding|nucleoplasm|regulation of flower development|vernalization response|sequence-specific DNA binding
CmFLC1	Cse_sc003765.1_g080.1	0.1842	0.2224	0.0865	0.164367	0.5451	0.3651	0.8928	0.601	0	0.0859	0.0876	0.0578333	FLC	flowering locus C-like protein, splicing variant 2 [Eustoma exaltatum subsp. russellianum] [Eustoma exaltatum]	GO:0000982,GO:0003700,GO:0005634,GO:0006355,GO:0007275,GO:0008134,GO:0009908,GO:0009909,GO:0009910,GO:0010048,GO:0043565,GO:0044212,GO:0046983,GO:0048573	transcription factor activity, RNA polymerase II proximal promoter sequence-specific DNA binding|DNA-binding transcription factor activity|nucleus|regulation of transcription, DNA-templated|multicellular organism development|transcription factor binding|flower development|regulation of flower development|negative regulation of flower development|vernalization response|sequence-specific DNA bindin…
CmFLC2	Cse_sc000869.1_g040.1	0.6486	0.9965	1.8836	1.17623	0.3925	0.8179	0.4572	0.555867	2.0704	3.5745	3.8109	3.15193	FLC	flowering locus C variant 3 [Citrus trifoliata]	GO:0000982,GO:0003700,GO:0005634,GO:0006355,GO:0007275,GO:0008134,GO:0009908,GO:0009909,GO:0009910,GO:0010048,GO:0043565,GO:0044212,GO:0046983,GO:0048573	transcription factor activity, RNA polymerase II proximal promoter sequence-specific DNA binding|DNA-binding transcription factor activity|nucleus|regulation of transcription, DNA-templated|multicellular organism development|transcription factor binding|flower development|regulation of flower development|negative regulation of flower development|vernalization response|sequence-specific DNA bindin…
CmVIN3	Cse_sc006760.1_g020.1	14.3233	15.7684	15.8665	15.3194	11.2502	15.245	11.9537	12.8163	8.7616	9.4764	7.3451	8.5277	VIN3	protein VERNALIZATION INSENSITIVE 3-like [Erythranthe guttata]	GO:0003677,GO:0005677,GO:0009409,GO:0009506,GO:0009908,GO:0031519,GO:0032922,GO:0035064,GO:0042802,GO:0046872,GO:0048587,GO:1900111	DNA binding|chromatin silencing complex|response to cold|plasmodesma|flower development|PcG protein complex|circadian regulation of gene expression|methylated histone binding|identical protein binding|metal ion binding|regulation of short-day photoperiodism, flowering|positive regulation of histone H3-K9 dimethylation
CmFT	Cse_sc022864.1_g010.1	0.9883	2.0588	1.7117	1.58627	4.8958	2.0034	2.0944	2.99787	9.1606	4.4916	13.5574	9.06987	FT	flowering locus T-like protein [Chrysanthemum x morifolium]	GO:0005634,GO:0005737,GO:0008429,GO:0009908,GO:0009909,GO:0010229,GO:0030154,GO:0048510,GO:0048572,GO:0048575	nucleus|cytoplasm|phosphatidylethanolamine binding|flower development|regulation of flower development|inflorescence development|cell differentiation|regulation of timing of transition from vegetative to reproductive phase|short-day photoperiodism|short-day photoperiodism, flowering	ko04712	Circadian rhythm - plant
CmFKF1	Cse_sc024386.1_g020.1	46.4925	54.7645	46.5015	49.2528	49.6618	68.9649	57.0431	58.5566	47.917	53.2456	49.8324	50.3317	FKF1	flavin-binding kelch repeat F-box 1, partial [Helianthus annuus]	GO:0005634,GO:0005829,GO:0006355,GO:0007623,GO:0009637,GO:0009881,GO:0009908,GO:0009911,GO:0010468,GO:0016567,GO:0018298,GO:0019005	nucleus|cytosol|regulation of transcription, DNA-templated|circadian rhythm|response to blue light|photoreceptor activity|flower development|positive regulation of flower development|regulation of gene expression|protein ubiquitination|protein-chromophore linkage|SCF ubiquitin ligase complex	ko04712	Circadian rhythm - plant
CmCOL91	Cse_sc001749.1_g010.1	0.0733726	0	0	0.0244575	0	0.0762702	0.14213	0.0728001	0.300527	0.0789708	0.0685699	0.149356	COL9	Zinc finger protein CONSTANS-LIKE 9	GO:0003700,GO:0005634,GO:0006355,GO:0007623,GO:0008270,GO:0048579	DNA-binding transcription factor activity|nucleus|regulation of transcription, DNA-templated|circadian rhythm|zinc ion binding|negative regulation of long-day photoperiodism, flowering
CmCOL21	Cse_sc004058.1_g040.1	0	0.267979	0	0.0893263	0	0	0.0753857	0.0251286	0.645245	0.0868738	0.615457	0.449192	COL2	Zinc finger protein CONSTANS-LIKE 2	GO:0003677,GO:0003700,GO:0005634,GO:0008270,GO:0009658,GO:0009909	DNA binding|DNA-binding transcription factor activity|nucleus|zinc ion binding|chloroplast organization|regulation of flower development
CmCOL22	Cse_sc004062.1_g060.1	18.3623	27.0053	34.1459	26.5045	48.0484	17.0872	43.3055	36.147	244.33	207.218	196.928	216.159	COL2	Zinc finger protein CONSTANS-LIKE 2	GO:0003677,GO:0003700,GO:0005634,GO:0008270,GO:0009658,GO:0009909	DNA binding|DNA-binding transcription factor activity|nucleus|zinc ion binding|chloroplast organization|regulation of flower development
CmCOL1	Cse_sc004203.1_g040.1	5.54043	5.85352	9.81673	7.07023	1.9564	1.01458	3.01534	1.99544	0.305822	0.24935	0	0.185057	COL1	Zinc finger protein CONSTANS-LIKE 1	GO:0003677,GO:0003700,GO:0005634,GO:0008270,GO:0009909,GO:0042802	DNA binding|DNA-binding transcription factor activity|nucleus|zinc ion binding|regulation of flower development|identical protein binding
CmCOL92	Cse_sc006746.1_g050.1	0.144648	0	0	0.048216	0.367981	0.100118	0.230584	0.232894	0	0.211632	0.0466256	0.0860859	COL9	Zinc finger protein CONSTANS-LIKE 9	GO:0003700,GO:0005634,GO:0006355,GO:0007623,GO:0008270,GO:0048579	DNA-binding transcription factor activity|nucleus|regulation of transcription, DNA-templated|circadian rhythm|zinc ion binding|negative regulation of long-day photoperiodism, flowering
CmCOL51	Cse_sc007055.1_g040.1	2.9181	3.55866	5.62215	4.03297	4.64365	1.73635	2.70692	3.02897	14.7967	9.41697	12.4507	12.2215	COL5	Zinc finger protein CONSTANS-LIKE 5	GO:0003700,GO:0005634,GO:0006355,GO:0008270,GO:0009909	DNA-binding transcription factor activity|nucleus|regulation of transcription, DNA-templated|zinc ion binding|regulation of flower development
CmCOL93	Cse_sc007973.1_g030.1	83.4712	73.3898	60.7491	72.5367	27.7728	62.2614	44.0835	44.7059	96.5167	47.9015	43.2372	62.5518	COL9	Zinc finger protein CONSTANS-LIKE 9	GO:0003700,GO:0005634,GO:0006355,GO:0007623,GO:0008270,GO:0048579	DNA-binding transcription factor activity|nucleus|regulation of transcription, DNA-templated|circadian rhythm|zinc ion binding|negative regulation of long-day photoperiodism, flowering
CmCOL23	Cse_sc036011.1_g020.1	0.0918471	0.103576	0	0.065141	0	0.0307763	0.0590228	0.029933	0.531871	1.0075	1.06869	0.869354	COL2	Zinc finger protein CONSTANS-LIKE 2	GO:0003677,GO:0003700,GO:0005634,GO:0008270,GO:0009658,GO:0009909	DNA binding|DNA-binding transcription factor activity|nucleus|zinc ion binding|chloroplast organization|regulation of flower development
CmCOL94	Cse_sc043898.1_g010.1	2.1292	1.70211	1.33895	1.72342	0.761171	2.09266	1.35471	1.40285	4.07728	1.93849	1.66719	2.56099	COL9	Zinc finger protein CONSTANS-LIKE 9	GO:0003700,GO:0005634,GO:0006355,GO:0007623,GO:0008270,GO:0048579	DNA-binding transcription factor activity|nucleus|regulation of transcription, DNA-templated|circadian rhythm|zinc ion binding|negative regulation of long-day photoperiodism, flowering
CmCOL52	Cse_sc045434.1_g010.1	15.9509	18.7814	22.2274	18.9866	13.5683	10.4335	9.15219	11.0513	49.9753	29.3978	32.0903	37.1545	COL5	Zinc finger protein CONSTANS-LIKE 5	GO:0003700,GO:0005634,GO:0006355,GO:0008270,GO:0009909	DNA-binding transcription factor activity|nucleus|regulation of transcription, DNA-templated|zinc ion binding|regulation of flower development
CmCRY11	Cse_sc002391.1_g020.1	14.3336	14.4678	11.7031	13.5015	5.6884	12.2086	8.29625	8.73108	16.7251	13.5911	13.221	14.5124	CRY1	Cryptochrome-1	GO:0004672,GO:0005524,GO:0005634,GO:0005737,GO:0006952,GO:0007623,GO:0009414,GO:0009416,GO:0009583,GO:0009637,GO:0009638,GO:0009640,GO:0009644,GO:0009646,GO:0009785,GO:0009882,GO:0010075,GO:0010114,GO:0010117,GO:0010118,GO:0010218,GO:0010244,GO:0010310,GO:0010343,GO:0010617,GO:0016301,GO:0016604,GO:0016605,GO:0018298,GO:0042752,GO:0042802,GO:0046283,GO:0046777,GO:0046872,GO:0051510,GO:0055114,GO:…	protein kinase activity|ATP binding|nucleus|cytoplasm|defense response|circadian rhythm|response to water deprivation|response to light stimulus|detection of light stimulus|response to blue light|phototropism|photomorphogenesis|response to high light intensity|response to absence of light|blue light signaling pathway|blue light photoreceptor activity|regulation of meristem growth|response to red …
CmCRY12	Cse_sc004241.1_g050.1	32.6003	29.4093	22.0002	28.0033	59.7244	81.3142	65.4333	68.824	195.407	93.2161	111.382	133.335	CRY1	Cryptochrome-1	GO:0004672,GO:0005524,GO:0005634,GO:0005737,GO:0006952,GO:0007623,GO:0009414,GO:0009416,GO:0009583,GO:0009637,GO:0009638,GO:0009640,GO:0009644,GO:0009646,GO:0009785,GO:0009882,GO:0010075,GO:0010114,GO:0010117,GO:0010118,GO:0010218,GO:0010244,GO:0010310,GO:0010343,GO:0010617,GO:0016301,GO:0016604,GO:0016605,GO:0018298,GO:0042752,GO:0042802,GO:0046283,GO:0046777,GO:0046872,GO:0051510,GO:0055114,GO:…	protein kinase activity|ATP binding|nucleus|cytoplasm|defense response|circadian rhythm|response to water deprivation|response to light stimulus|detection of light stimulus|response to blue light|phototropism|photomorphogenesis|response to high light intensity|response to absence of light|blue light signaling pathway|blue light photoreceptor activity|regulation of meristem growth|response to red …
CmCRY2	Cse_sc021583.1_g040.1	27.7266	27.3484	21.2424	25.4391	17.3183	35.2517	22.4636	25.0112	17.5966	16.9151	17.1855	17.2324	CRY2	Cryptochrome-2	GO:0005524,GO:0005634,GO:0005737,GO:0005773,GO:0006325,GO:0006338,GO:0007623,GO:0009414,GO:0009416,GO:0009637,GO:0009638,GO:0009646,GO:0009785,GO:0009882,GO:0009909,GO:0009911,GO:0010075,GO:0010118,GO:0010244,GO:0010617,GO:0016310,GO:0016604,GO:0016605,GO:0018298,GO:0042752,GO:0042802,GO:0046872,GO:0048574,GO:0051607,GO:0071949,GO:0072387,GO:1901371,GO:1902347,GO:2000028,GO:2000379	ATP binding|nucleus|cytoplasm|vacuole|chromatin organization|chromatin remodeling|circadian rhythm|response to water deprivation|response to light stimulus|response to blue light|phototropism|response to absence of light|blue light signaling pathway|blue light photoreceptor activity|regulation of flower development|positive regulation of flower development|regulation of meristem growth|stomatal m…
CmGI1	Cse_sc000118.1_g070.1	49.4337	49.174	58.4845	52.3641	30.2736	35.6533	31.8512	32.5927	36.4871	25.0977	28.9203	30.1684	GI	Protein GIGANTEA	GO:0005634,GO:0005654,GO:0005737,GO:0006355,GO:0007623,GO:0009409,GO:0009585,GO:0009637,GO:0009908,GO:0010218,GO:0010378,GO:0030154,GO:0042542,GO:0042752,GO:0048578,GO:0048586,GO:0080167	nucleus|nucleoplasm|cytoplasm|regulation of transcription, DNA-templated|circadian rhythm|response to cold|red, far-red light phototransduction|response to blue light|flower development|response to far red light|temperature compensation of the circadian clock|cell differentiation|response to hydrogen peroxide|regulation of circadian rhythm|positive regulation of long-day photoperiodism, flowering…
CmGI2	Cse_sc000421.1_g060.1	13.3193	12.7411	11.3484	12.4696	6.38789	10.343	9.39863	8.70984	7.40236	5.55723	7.51917	6.82625	GI	Protein GIGANTEA	GO:0005634,GO:0005654,GO:0005737,GO:0006355,GO:0007623,GO:0009409,GO:0009585,GO:0009637,GO:0009908,GO:0010218,GO:0010378,GO:0030154,GO:0042542,GO:0042752,GO:0048578,GO:0048586,GO:0080167	nucleus|nucleoplasm|cytoplasm|regulation of transcription, DNA-templated|circadian rhythm|response to cold|red, far-red light phototransduction|response to blue light|flower development|response to far red light|temperature compensation of the circadian clock|cell differentiation|response to hydrogen peroxide|regulation of circadian rhythm|positive regulation of long-day photoperiodism, flowering…
CmGI3	Cse_sc004386.1_g020.1	0.868617	0.264367	0.419295	0.517426	0.184954	0.176748	0.603609	0.32177	1.58544	0.19185	0.562656	0.779982	GI	Protein GIGANTEA	GO:0005634,GO:0009908,GO:0030154,GO:0042752,GO:0048511,GO:0048586	nucleus|flower development|cell differentiation|regulation of circadian rhythm|rhythmic process|regulation of long-day photoperiodism, flowering
CmGI4	Cse_sc018610.1_g040.1	24.6047	24.5364	24.3668	24.5026	11.1405	17.0652	16.9871	15.0643	12.4858	9.95152	13.0366	11.8246	GI	Protein GIGANTEA	GO:0005634,GO:0005654,GO:0005737,GO:0006355,GO:0007623,GO:0009409,GO:0009585,GO:0009637,GO:0009908,GO:0010218,GO:0010378,GO:0030154,GO:0042542,GO:0042752,GO:0048578,GO:0048586,GO:0080167	nucleus|nucleoplasm|cytoplasm|regulation of transcription, DNA-templated|circadian rhythm|response to cold|red, far-red light phototransduction|response to blue light|flower development|response to far red light|temperature compensation of the circadian clock|cell differentiation|response to hydrogen peroxide|regulation of circadian rhythm|positive regulation of long-day photoperiodism, flowering…
CmPHYA1	Cse_sc000147.1_g110.1	7.37342	9.33623	7.63635	8.11533	5.17458	6.44363	5.78945	5.80255	5.43542	3.1317	2.59703	3.72138	PHYA	Phytochrome A	GO:0006355,GO:0009584,GO:0009585,GO:0009881,GO:0017006,GO:0018298,GO:0042803	regulation of transcription, DNA-templated|detection of visible light|red, far-red light phototransduction|photoreceptor activity|protein-tetrapyrrole linkage|protein-chromophore linkage|protein homodimerization activity
CmPHYB1	Cse_sc006397.1_g050.1	10.4434	12.1668	14.1858	12.2653	9.49566	9.80365	9.68911	9.66281	15.4412	10.9763	13.558	13.3252	PHYB	Phytochrome B	GO:0000155,GO:0005622,GO:0006355,GO:0009584,GO:0009585,GO:0009881,GO:0017006,GO:0018298,GO:0042803	phosphorelay sensor kinase activity|intracellular|regulation of transcription, DNA-templated|detection of visible light|red, far-red light phototransduction|photoreceptor activity|protein-tetrapyrrole linkage|protein-chromophore linkage|protein homodimerization activity
CmPHYB2	Cse_sc026913.1_g020.1	7.11919	8.29457	7.49005	7.6346	3.83014	4.46125	4.07881	4.1234	1.05596	1.11255	0.828858	0.999123	PHYB	Phytochrome B	GO:0000155,GO:0005622,GO:0006355,GO:0009584,GO:0009585,GO:0009881,GO:0017006,GO:0018298,GO:0042803	phosphorelay sensor kinase activity|intracellular|regulation of transcription, DNA-templated|detection of visible light|red, far-red light phototransduction|photoreceptor activity|protein-tetrapyrrole linkage|protein-chromophore linkage|protein homodimerization activity
CmPHYA2	Cse_sc035214.1_g010.1	0	0.129851	0.238693	0.122848	0	0.361536	0.333132	0.231556	0	0.255548	0.223541	0.159696	PHYA	Phytochrome A	GO:0000155,GO:0005622,GO:0006355,GO:0009584,GO:0009585,GO:0009881,GO:0017006,GO:0018298,GO:0042803	phosphorelay sensor kinase activity|intracellular|regulation of transcription, DNA-templated|detection of visible light|red, far-red light phototransduction|photoreceptor activity|protein-tetrapyrrole linkage|protein-chromophore linkage|protein homodimerization activity
CmCOP11	Cse_sc000013.1_g060.1	2.70294	3.3646	3.43672	3.16809	4.32561	3.71679	3.74429	3.9289	2.88179	1.91526	3.03664	2.61123	COP1	E3 ubiquitin-protein ligase COP1	GO:0000152,GO:0004842,GO:0005634,GO:0005737,GO:0006281,GO:0009585,GO:0009640,GO:0009641,GO:0009647,GO:0009649,GO:0010119,GO:0016604,GO:0042802,GO:0046283,GO:0046872,GO:0048573,GO:0061630,GO:0080008	nuclear ubiquitin ligase complex|ubiquitin-protein transferase activity|nucleus|cytoplasm|DNA repair|red, far-red light phototransduction|photomorphogenesis|shade avoidance|skotomorphogenesis|entrainment of circadian clock|regulation of stomatal movement|nuclear body|identical protein binding|anthocyanin-containing compound metabolic process|metal ion binding|photoperiodism, flowering|ubiquitin p…	ko04120,ko04115	Ubiquitin mediated proteolysis|p53 signaling pathway
CmCOP12	Cse_sc000264.1_g050.1	0.524252	0.909916	0.402034	0.612067	1.19025	1.15287	1.34454	1.22922	0.413041	0.401702	0.291328	0.36869	COP1	E3 ubiquitin-protein ligase COP1	GO:0000152,GO:0004842,GO:0005634,GO:0005737,GO:0006281,GO:0009585,GO:0009640,GO:0009641,GO:0009647,GO:0009649,GO:0010119,GO:0016604,GO:0042802,GO:0046283,GO:0046872,GO:0048573,GO:0061630,GO:0080008	nuclear ubiquitin ligase complex|ubiquitin-protein transferase activity|nucleus|cytoplasm|DNA repair|red, far-red light phototransduction|photomorphogenesis|shade avoidance|skotomorphogenesis|entrainment of circadian clock|regulation of stomatal movement|nuclear body|identical protein binding|anthocyanin-containing compound metabolic process|metal ion binding|photoperiodism, flowering|ubiquitin p…	ko04120,ko04115	Ubiquitin mediated proteolysis|p53 signaling pathway
CmCOP13	Cse_sc007975.1_g060.1	5.69644	4.83437	4.72958	5.0868	3.64059	3.70217	3.78586	3.70954	6.44942	3.68957	4.31655	4.81851	COP1	E3 ubiquitin-protein ligase COP1	GO:0000152,GO:0004842,GO:0005634,GO:0005737,GO:0006281,GO:0009585,GO:0009640,GO:0009641,GO:0009647,GO:0009649,GO:0010119,GO:0016604,GO:0042802,GO:0046283,GO:0046872,GO:0048573,GO:0061630,GO:0080008	nuclear ubiquitin ligase complex|ubiquitin-protein transferase activity|nucleus|cytoplasm|DNA repair|red, far-red light phototransduction|photomorphogenesis|shade avoidance|skotomorphogenesis|entrainment of circadian clock|regulation of stomatal movement|nuclear body|identical protein binding|anthocyanin-containing compound metabolic process|metal ion binding|photoperiodism, flowering|ubiquitin p…
CmCOP14	Cse_sc013349.1_g030.1	14.5376	18.3738	17.6603	16.8572	19.9555	19.7022	19.7433	19.8003	37.685	21.4068	22.7052	27.2657	COP1	E3 ubiquitin-protein ligase COP1	GO:0000152,GO:0004842,GO:0005634,GO:0005737,GO:0006281,GO:0009585,GO:0009640,GO:0009641,GO:0009647,GO:0009649,GO:0010119,GO:0016604,GO:0042802,GO:0046283,GO:0046872,GO:0048573,GO:0061630,GO:0080008	nuclear ubiquitin ligase complex|ubiquitin-protein transferase activity|nucleus|cytoplasm|DNA repair|red, far-red light phototransduction|photomorphogenesis|shade avoidance|skotomorphogenesis|entrainment of circadian clock|regulation of stomatal movement|nuclear body|identical protein binding|anthocyanin-containing compound metabolic process|metal ion binding|photoperiodism, flowering|ubiquitin p…	ko04120,ko04115	Ubiquitin mediated proteolysis|p53 signaling pathway
CmTEM1	Cse_sc005841.1_g010.1	0.453576	0.515664	0.338217	0.435819	2.12078	1.21787	5.04218	2.79361	57.3523	60.4704	69.3066	62.3764	TEM1	AP2/ERF and B3 domain-containing transcription repressor TEM1	GO:0003677,GO:0003700,GO:0005634,GO:0009873,GO:0048573	DNA binding|DNA-binding transcription factor activity|nucleus|ethylene-activated signaling pathway|photoperiodism, flowering
CmCDF11	Cse_sc006955.1_g020.1	13.7876	8.84114	6.48082	9.70319	15.2865	38.8886	15.5749	23.25	10.0593	8.34225	11.1973	9.86628	CDF1	Cyclic dof factor 1	GO:0000978,GO:0001210,GO:0003677,GO:0003700,GO:0005634,GO:0006355,GO:0009658,GO:0009908,GO:0010228,GO:0043565,GO:0045892,GO:0046872,GO:0048510	RNA polymerase II proximal promoter sequence-specific DNA binding|transcriptional repressor activity, metal ion regulated sequence-specific DNA binding|DNA binding|DNA-binding transcription factor activity|nucleus|regulation of transcription, DNA-templated|chloroplast organization|flower development|vegetative to reproductive phase transition of meristem|sequence-specific DNA binding|negative reg…
CmCDF21	Cse_sc008803.1_g020.1	3.98719	1.67284	1.99217	2.55073	0.161756	0.824162	0.296905	0.427608	3.65223	0.632059	0.756829	1.68037	CDF2	Cyclic dof factor 2	GO:0003677,GO:0003700,GO:0005634,GO:0006355,GO:0009908,GO:0043565,GO:0046872	DNA binding|DNA-binding transcription factor activity|nucleus|regulation of transcription, DNA-templated|flower development|sequence-specific DNA binding|metal ion binding
CmCDF22	Cse_sc009213.1_g010.1	5.85863	3.42697	3.36643	4.21734	1.7932	4.02104	2.70904	2.84109	12.447	9.4989	8.69153	10.2125	CDF2	Cyclic dof factor 2	GO:0003677,GO:0003700,GO:0005634,GO:0006355,GO:0009908,GO:0043565,GO:0046872	DNA binding|DNA-binding transcription factor activity|nucleus|regulation of transcription, DNA-templated|flower development|sequence-specific DNA binding|metal ion binding
CmCDF3	Cse_sc020538.1_g030.1	5.29966	2.3985	2.74716	3.48177	0.840887	3.17448	1.28887	1.76808	1.92005	1.81235	1.91901	1.8838	CDF3	Cyclic dof factor 3	GO:0003677,GO:0003700,GO:0005634,GO:0006355,GO:0009908,GO:0043565,GO:0046872	DNA binding|DNA-binding transcription factor activity|nucleus|regulation of transcription, DNA-templated|flower development|sequence-specific DNA binding|metal ion binding
CmCDF12	Cse_sc024916.1_g020.1	1.81434	1.41379	1.61588	1.61467	0.801994	0.0638705	0.837062	0.567642	0.349192	0.275899	0.242314	0.289135	CDF1	Cyclic dof factor 1	GO:0000978,GO:0001210,GO:0003677,GO:0003700,GO:0005634,GO:0006355,GO:0009658,GO:0009908,GO:0010228,GO:0043565,GO:0045892,GO:0046872,GO:0048510	RNA polymerase II proximal promoter sequence-specific DNA binding|transcriptional repressor activity, metal ion regulated sequence-specific DNA binding|DNA binding|DNA-binding transcription factor activity|nucleus|regulation of transcription, DNA-templated|chloroplast organization|flower development|vegetative to reproductive phase transition of meristem|sequence-specific DNA binding|negative reg…
CmCDF4	Cse_sc061933.1_g010.1	4.04357	5.93695	0.594031	3.52485	3.75247	1.87464	5.95751	3.86154	7.4123	8.60556	11.0456	9.02115	CDF4	Cyclic dof factor 4	GO:0003677,GO:0003700,GO:0005634,GO:0009908,GO:0043565,GO:0045892,GO:0046872,GO:1902455	DNA binding|DNA-binding transcription factor activity|nucleus|flower development|sequence-specific DNA binding|negative regulation of transcription, DNA-templated|metal ion binding|negative regulation of stem cell population maintenance
CmFCA1	Cse_sc016594.1_g020.1	18.183	17.0897	15.9892	17.0873	16.5021	18.9308	18.599	18.0106	13.4739	13.8602	13.2709	13.535	FCA	Flowering time control protein FCA	GO:0003723,GO:0003729,GO:0005634,GO:0005737,GO:0009908,GO:0030154,GO:1990904	RNA binding|mRNA binding|nucleus|cytoplasm|flower development|cell differentiation|ribonucleoprotein complex
CmFCA2	Cse_sc021505.1_g020.1	3.24581	4.7606	6.04515	4.68385	5.38446	5.01374	4.05586	4.81802	6.6138	5.91984	5.79084	6.10816	FCA	Flowering time control protein FCA	GO:0003723,GO:0003729,GO:0005634,GO:0005737,GO:0009908,GO:0030154,GO:1990904	RNA binding|mRNA binding|nucleus|cytoplasm|flower development|cell differentiation|ribonucleoprotein complex
CmFCA3	Cse_sc164206.1_g010.1	2.74239	2.51558	2.24697	2.50165	1.61106	2.2869	3.09907	2.33234	2.57527	2.00061	2.66392	2.41327	FCA	Flowering time control protein FCA	GO:0003723,GO:0003729,GO:0005634,GO:0005737,GO:0009908,GO:0030154,GO:1990904	RNA binding|mRNA binding|nucleus|cytoplasm|flower development|cell differentiation|ribonucleoprotein complex
CmFPA1	Cse_sc005879.1_g020.1	5.28862	4.30775	3.80196	4.46611	3.59383	3.92759	4.43608	3.98583	4.63108	4.16954	4.18364	4.32809	FPA	Flowering time control protein FPA	GO:0000785,GO:0003723,GO:0005634,GO:0006378,GO:0009553,GO:0009908,GO:0009911,GO:0010228,GO:0030154,GO:0031048	chromatin|RNA binding|nucleus|mRNA polyadenylation|embryo sac development|flower development|positive regulation of flower development|vegetative to reproductive phase transition of meristem|cell differentiation|chromatin silencing by small RNA
CmFPA2	Cse_sc006327.1_g070.1	14.0606	14.9707	14.8229	14.6181	13.5004	15.7252	15.3238	14.8498	15.4449	14.263	14.1393	14.6157	FPA	Flowering time control protein FPA	GO:0000785,GO:0003723,GO:0005634,GO:0006378,GO:0009553,GO:0009908,GO:0009911,GO:0010228,GO:0030154,GO:0031048	chromatin|RNA binding|nucleus|mRNA polyadenylation|embryo sac development|flower development|positive regulation of flower development|vegetative to reproductive phase transition of meristem|cell differentiation|chromatin silencing by small RNA
CmFPA3	Cse_sc014666.1_g020.1	5.05897	5.10308	4.81751	4.99319	2.95943	4.04745	3.40779	3.47156	2.67307	2.77046	2.80901	2.75085	FPA	Flowering time control protein FPA	GO:0000785,GO:0003723,GO:0005634,GO:0006378,GO:0009553,GO:0009908,GO:0009911,GO:0010228,GO:0030154,GO:0031048	chromatin|RNA binding|nucleus|mRNA polyadenylation|embryo sac development|flower development|positive regulation of flower development|vegetative to reproductive phase transition of meristem|cell differentiation|chromatin silencing by small RNA
CmFPA4	Cse_sc028787.1_g020.1	7.1359	7.06557	7.26238	7.15462	6.32097	6.73556	9.14388	7.40014	4.21501	7.19261	4.41635	5.27466	FPA	Flowering time control protein FPA	GO:0000785,GO:0003723,GO:0005634,GO:0006378,GO:0009553,GO:0009908,GO:0009911,GO:0010228,GO:0030154,GO:0031048	chromatin|RNA binding|nucleus|mRNA polyadenylation|embryo sac development|flower development|positive regulation of flower development|vegetative to reproductive phase transition of meristem|cell differentiation|chromatin silencing by small RNA
CmFY	Cse_sc005744.1_g020.1	9.87994	9.75244	10.3511	9.99449	9.25765	7.91242	9.39199	8.85402	5.0432	5.58177	5.88779	5.50425	FY	Flowering time control protein FY	GO:0005847,GO:0006378,GO:0009908,GO:0030154	mRNA cleavage and polyadenylation specificity factor complex|mRNA polyadenylation|flower development|cell differentiation	ko03015	mRNA surveillance pathway
CmFLD1	Cse_sc013411.1_g020.1	2.35002	1.58817	1.25917	1.73245	0.711159	1.81773	0.821298	1.11673	1.47619	1.22915	1.42279	1.37604	FLD	Protein FLOWERING LOCUS D	GO:0003677,GO:0010228,GO:0016491,GO:0016575	DNA binding|vegetative to reproductive phase transition of meristem|oxidoreductase activity|histone deacetylation
CmFLD2	Cse_sc036076.1_g010.1	4.31964	13.5259	4.63599	7.49384	17.2905	10.5871	10.3829	12.7535	0	9.17521	6.70286	5.29269	FLD	Protein FLOWERING LOCUS D	GO:0003677,GO:0010228,GO:0016491,GO:0016575	DNA binding|vegetative to reproductive phase transition of meristem|oxidoreductase activity|histone deacetylation
CmFLD3	Cse_sc182834.1_g010.1	4.87452	2.58845	2.73184	3.39827	2.20199	6.55689	3.08862	3.94917	3.89609	1.28648	2.68442	2.62233	FLD	Protein FLOWERING LOCUS D	GO:0003677,GO:0010228,GO:0016491,GO:0016575	DNA binding|vegetative to reproductive phase transition of meristem|oxidoreductase activity|histone deacetylation
CmFLK1	Cse_sc001838.1_g040.1	0	1.13853	1.10992	0.749483	0	0.594119	0	0.19804	1.68784	0	0.913303	0.867048	FLK	Flowering locus K homology domain	GO:0003723,GO:0005634,GO:0005737,GO:0009911	RNA binding|nucleus|cytoplasm|positive regulation of flower development
CmFLK2	Cse_sc004738.1_g020.1	15.3725	15.1886	15.9437	15.5016	10.3534	9.86687	10.6053	10.2752	6.92727	8.32898	9.45658	8.23761	FLK	Flowering locus K homology domain	GO:0003723,GO:0005634,GO:0005737,GO:0009911	RNA binding|nucleus|cytoplasm|positive regulation of flower development
CmFLK3	Cse_sc028208.1_g010.1	18.5704	17.8619	20.2347	18.889	13.0294	15.2734	16.1468	14.8165	15.1125	15.6341	15.9368	15.5611	FLK	Flowering locus K homology domain	GO:0003723,GO:0005634,GO:0005737,GO:0009911	RNA binding|nucleus|cytoplasm|positive regulation of flower development
CmGID1B1	Cse_sc000203.1_g150.1	16.0141	15.0609	19.9607	17.0119	15.468	22.8828	18.0584	18.8031	14.5086	24.1331	35.0372	24.5596	GID1B	Gibberellin receptor GID1B	GO:0005634,GO:0005737,GO:0009739,GO:0009939,GO:0010325,GO:0010331,GO:0010476,GO:0010629,GO:0016787,GO:0048444,GO:0048530,GO:1905516	nucleus|cytoplasm|response to gibberellin|positive regulation of gibberellic acid mediated signaling pathway|raffinose family oligosaccharide biosynthetic process|gibberellin binding|gibberellin mediated signaling pathway|negative regulation of gene expression|hydrolase activity|floral organ morphogenesis|fruit morphogenesis|positive regulation of fertilization	ko04075	Plant hormone signal transduction
CmGID1B2	Cse_sc001134.1_g050.1	37.8959	36.6426	34.8251	36.4545	30.3664	44.1784	24.8384	33.1277	7.59714	12.0382	15.6009	11.7454	GID1B	Gibberellin receptor GID1B	GO:0005634,GO:0005737,GO:0009739,GO:0009939,GO:0010325,GO:0010331,GO:0010476,GO:0010629,GO:0016787,GO:0048444,GO:0048530,GO:1905516	nucleus|cytoplasm|response to gibberellin|positive regulation of gibberellic acid mediated signaling pathway|raffinose family oligosaccharide biosynthetic process|gibberellin binding|gibberellin mediated signaling pathway|negative regulation of gene expression|hydrolase activity|floral organ morphogenesis|fruit morphogenesis|positive regulation of fertilization	ko04075	Plant hormone signal transduction
CmGID1A	Cse_sc022467.1_g040.1	18.5282	12.6741	7.76454	12.9889	9.38571	28.5458	16.4149	18.1155	16.0325	13.9633	14.7636	14.9198	GID1A	Gibberellin receptor GID1A	GO:0005634,GO:0005737,GO:0009739,GO:0009939,GO:0010325,GO:0010331,GO:0010476,GO:0016787,GO:0048444,GO:0048530,GO:1905516	nucleus|cytoplasm|response to gibberellin|positive regulation of gibberellic acid mediated signaling pathway|raffinose family oligosaccharide biosynthetic process|gibberellin binding|gibberellin mediated signaling pathway|hydrolase activity|floral organ morphogenesis|fruit morphogenesis|positive regulation of fertilization	ko04075	Plant hormone signal transduction
CmGAI1	Cse_sc000641.1_g030.1	12.7718	13.6328	12.0348	12.8131	27.7833	23.7383	22.1916	24.5711	23.5297	25.5283	22.7545	23.9375	GAI	DELLA protein GAI	GO:0003700,GO:0003713,GO:0005634,GO:0006808,GO:0007275,GO:0009723,GO:0009737,GO:0009739,GO:0009740,GO:0009863,GO:0009867,GO:0009938,GO:0009939,GO:0010187,GO:0010218,GO:0010233,GO:0010336,GO:0010628,GO:0010629,GO:0033206,GO:0042538,GO:0043565,GO:1900033,GO:1903508,GO:1905614,GO:1905622,GO:2000033,GO:2000377	DNA-binding transcription factor activity|transcription coactivator activity|nucleus|regulation of nitrogen utilization|multicellular organism development|response to ethylene|response to abscisic acid|response to gibberellin|gibberellic acid mediated signaling pathway|salicylic acid mediated signaling pathway|jasmonic acid mediated signaling pathway|negative regulation of gibberellic acid mediat…	ko04075	Plant hormone signal transduction
CmGAI11	Cse_sc000813.1_g100.1	0.128365	0.126013	0.0568933	0.103757	0.07818	0.223065	0.106816	0.13602	0	0.0619821	0	0.0206607	GAI1	DELLA protein GAI1
CmRGL21	Cse_sc000813.1_g110.1	4.66224	3.38424	2.20744	3.41797	10.1944	45.7628	18.9604	24.9725	6.01733	2.7388	3.23947	3.99853	RGL2	DELLA protein RGL2
CmRGA22	Cse_sc001467.1_g110.1	0.504319	0.41123	0.335169	0.416906	1.07505	0.981767	0.62305	0.893289	0.248774	0.1964	0.24314	0.229438	RGA2	DELLA protein RGA2	GO:0003712,GO:0005634,GO:0009740	transcription coregulator activity|nucleus|gibberellic acid mediated signaling pathway
CmRGL11	Cse_sc004369.1_g030.1	1.46606	1.60837	1.31834	1.46426	1.2262	1.08186	1.52734	1.27847	1.75146	1.15416	1.35884	1.42149	RGL1	DELLA protein RGL1	GO:0003700,GO:0003712,GO:0005634,GO:0009723,GO:0009737,GO:0009739,GO:0009740,GO:0009863,GO:0009867,GO:0009908,GO:0009938,GO:0010187,GO:0030154,GO:0042538,GO:0043565,GO:2000033,GO:2000377	DNA-binding transcription factor activity|transcription coregulator activity|nucleus|response to ethylene|response to abscisic acid|response to gibberellin|gibberellic acid mediated signaling pathway|salicylic acid mediated signaling pathway|jasmonic acid mediated signaling pathway|flower development|negative regulation of gibberellic acid mediated signaling pathway|negative regulation of seed ge…
CmGAI2	Cse_sc005037.1_g010.1	28.088	19.6885	24.3799	24.0521	29.1829	27.1012	32.9815	29.7552	31.0942	19.5021	20.0476	23.548	GAI	DELLA protein GAI	GO:0003700,GO:0003712,GO:0005634,GO:0009723,GO:0009737,GO:0009740,GO:0009863,GO:0009867,GO:0009938,GO:0010187,GO:0042538,GO:0043565,GO:2000033,GO:2000377	DNA-binding transcription factor activity|transcription coregulator activity|nucleus|response to ethylene|response to abscisic acid|gibberellic acid mediated signaling pathway|salicylic acid mediated signaling pathway|jasmonic acid mediated signaling pathway|negative regulation of gibberellic acid mediated signaling pathway|negative regulation of seed germination|hyperosmotic salinity response|se…	ko04075	Plant hormone signal transduction
CmRGL23	Cse_sc006303.1_g040.1	0.128286	0	0	0.042762	0.0228772	0	0.10322	0.0420324	0	0.0233999	0.0414307	0.0216102	RGL2	DELLA protein RGL2
CmGAI12	Cse_sc008079.1_g040.1	23.642	20.1915	14.8215	19.5517	13.4992	21.3648	16.2667	17.0436	4.85534	8.30089	5.64369	6.26664	GAI1	DELLA protein GAI1			ko04075	Plant hormone signal transduction
CmGAI13	Cse_sc010019.1_g030.1	0.470773	0.631083	1.48998	0.863945	0.317064	0.0433079	0.0826302	0.147667	1.17376	0.0942305	0.289437	0.519142	GAI1	DELLA protein GAI1
CmGAIP	Cse_sc011713.1_g060.1	0	0.0927396	0.264444	0.119061	0	0.265892	0.0801526	0.115348	0	0.0920562	0	0.0306854	GAIP	DELLA protein GAIP	GO:0003712,GO:0005634,GO:0009740	transcription coregulator activity|nucleus|gibberellic acid mediated signaling pathway	ko04075	Plant hormone signal transduction
CmRGL12	Cse_sc016942.1_g010.1	0.0868728	0.0328383	0.0297108	0.0498073	0.0306974	0	0.22118	0.0839591	0.091219	0.031969	0.0572404	0.0601428	RGL1	DELLA protein RGL1	GO:0003700,GO:0003712,GO:0005634,GO:0009723,GO:0009737,GO:0009739,GO:0009740,GO:0009863,GO:0009867,GO:0009908,GO:0009938,GO:0010187,GO:0030154,GO:0042538,GO:0043565,GO:2000033,GO:2000377	DNA-binding transcription factor activity|transcription coregulator activity|nucleus|response to ethylene|response to abscisic acid|response to gibberellin|gibberellic acid mediated signaling pathway|salicylic acid mediated signaling pathway|jasmonic acid mediated signaling pathway|flower development|negative regulation of gibberellic acid mediated signaling pathway|negative regulation of seed ge…
CmGAI14	Cse_sc017681.1_g030.1	0.339256	0.352915	0.672876	0.455016	0.865088	0.786335	1.10299	0.918138	0	0	0	0	GAI1	DELLA protein GAI1
CmGAI3	Cse_sc024387.1_g030.1	0.983081	2.00031	0.821626	1.26834	0.525368	1.31509	1.1584	0.999619	0.897678	0.658145	0.643352	0.733058	GAI	DELLA protein GAI	GO:0003700,GO:0003713,GO:0005634,GO:0006808,GO:0007275,GO:0009723,GO:0009737,GO:0009739,GO:0009740,GO:0009863,GO:0009867,GO:0009938,GO:0009939,GO:0010187,GO:0010218,GO:0010233,GO:0010336,GO:0010628,GO:0010629,GO:0033206,GO:0042538,GO:0043565,GO:1900033,GO:1903508,GO:1905614,GO:1905622,GO:2000033,GO:2000377	DNA-binding transcription factor activity|transcription coactivator activity|nucleus|regulation of nitrogen utilization|multicellular organism development|response to ethylene|response to abscisic acid|response to gibberellin|gibberellic acid mediated signaling pathway|salicylic acid mediated signaling pathway|jasmonic acid mediated signaling pathway|negative regulation of gibberellic acid mediat…	ko04075	Plant hormone signal transduction
CmGAI15	Cse_sc026045.1_g020.1	56.2915	43.1019	36.8993	45.4309	19.0229	22.1222	20.5951	20.5801	13.8824	16.9511	16.4111	15.7482	GAI1	DELLA protein GAI1			ko04075	Plant hormone signal transduction
CmRGL3	Cse_sc054260.1_g010.1	1.97385	1.51197	1.2984	1.59474	0	0	0.152322	0.050774	0	0	0.0754685	0.0251562	RGL3	DELLA protein RGL3	GO:0003700,GO:0003712,GO:0005634,GO:0007275,GO:0009723,GO:0009737,GO:0009739,GO:0009740,GO:0009863,GO:0009867,GO:0009938,GO:0010187,GO:0042538,GO:0043565,GO:2000033,GO:2000377	DNA-binding transcription factor activity|transcription coregulator activity|nucleus|multicellular organism development|response to ethylene|response to abscisic acid|response to gibberellin|gibberellic acid mediated signaling pathway|salicylic acid mediated signaling pathway|jasmonic acid mediated signaling pathway|negative regulation of gibberellic acid mediated signaling pathway|negative regul…
CmSPL6	Cse_sc000017.1_g020.1	1.59678	1.8299	3.22972	2.2188	0.941254	0.474157	1.20396	0.873124	0.704494	0.59495	0.414533	0.571326	SPL6	Squamosa promoter-binding-like protein 6	GO:0003677,GO:0003700,GO:0005634,GO:0006355,GO:0010468,GO:0042742,GO:0046872	DNA binding|DNA-binding transcription factor activity|nucleus|regulation of transcription, DNA-templated|regulation of gene expression|defense response to bacterium|metal ion binding
CmSPL5	Cse_sc000234.1_g020.1	5.0686	3.51147	1.23113	3.2704	0	0.277252	0	0.0924173	0.173267	0.431279	0.122871	0.242472	SPL5	Squamosa promoter-binding-like protein 5	GO:0003677,GO:0003700,GO:0005634,GO:0005737,GO:0006355,GO:0010321,GO:0046872	DNA binding|DNA-binding transcription factor activity|nucleus|cytoplasm|regulation of transcription, DNA-templated|regulation of vegetative phase change|metal ion binding
CmSPL12	Cse_sc000528.1_g060.1	13.9367	16.0298	18.6073	16.1913	13.4999	11.9705	13.4743	12.9816	8.39467	8.86502	7.82201	8.36057	SPL12	Squamosa promoter-binding-like protein 12	GO:0003677,GO:0005634,GO:0046872	DNA binding|nucleus|metal ion binding
CmSPL3	Cse_sc000600.1_g030.1	4.05374	3.89034	2.66866	3.53758	0.937074	0.258367	0.529556	0.574999	0	0.0404186	0.0357343	0.0253843	SPL3	Squamosa promoter-binding-like protein 3	GO:0003677,GO:0005634,GO:0046872	DNA binding|nucleus|metal ion binding
CmSPL71	Cse_sc001298.1_g050.1	0.165693	0.0577696	0.183776	0.135746	0.0682105	0.0647732	0.0244234	0.052469	0.167329	0.123818	0.0615008	0.117549	SPL7	Squamosa promoter-binding-like protein 7	GO:0003677,GO:0006355,GO:0016607,GO:0035874,GO:0042803,GO:0046872,GO:0048638	DNA binding|regulation of transcription, DNA-templated|nuclear speck|cellular response to copper ion starvation|protein homodimerization activity|metal ion binding|regulation of developmental growth
CmSPL2	Cse_sc001465.1_g080.1	0.427586	0.238026	0.669277	0.444963	0	1.36548	0.407981	0.591154	0.789114	0	0.199399	0.329504	SPL2	Squamosa promoter-binding-like protein 2	GO:0003700,GO:0005634,GO:0006355,GO:0043565,GO:0044212,GO:0046872,GO:0048510,GO:0048653	DNA-binding transcription factor activity|nucleus|regulation of transcription, DNA-templated|sequence-specific DNA binding|transcription regulatory region DNA binding|metal ion binding|regulation of timing of transition from vegetative to reproductive phase|anther development
CmSPL13B1	Cse_sc002380.1_g040.1	3.44424	4.76636	4.55987	4.25682	0.334766	0.573836	0.977341	0.628648	0.550414	0.598993	0.845859	0.665089	SPL13B	Squamosa promoter-binding-like protein 13B	GO:0003677,GO:0005634,GO:0046872,GO:0048653	DNA binding|nucleus|metal ion binding|anther development
CmSPL72	Cse_sc003886.1_g020.1	7.95803	6.58857	6.85158	7.13273	6.9886	7.53474	7.34337	7.2889	5.7184	6.48688	7.70433	6.63654	SPL7	Squamosa promoter-binding-like protein 7	GO:0003677,GO:0006355,GO:0016607,GO:0035874,GO:0042803,GO:0046872,GO:0048638	DNA binding|regulation of transcription, DNA-templated|nuclear speck|cellular response to copper ion starvation|protein homodimerization activity|metal ion binding|regulation of developmental growth
CmSPL11	Cse_sc003888.1_g070.1	0.449457	0.424086	0.392715	0.422086	0.0815293	0.561703	0.142796	0.262009	0.491898	0.243683	0.353298	0.36296	SPL11	Squamosa promoter-binding-like protein 11	GO:0003677,GO:0005634,GO:0046872	DNA binding|nucleus|metal ion binding
CmSPL14	Cse_sc005645.1_g020.1	2.12954	1.21858	1.79465	1.71426	1.09571	1.47194	1.05035	1.206	0.928148	0.556631	0.702848	0.729209	SPL14	Squamosa promoter-binding-like protein 14	GO:0003677,GO:0005634,GO:0046872	DNA binding|nucleus|metal ion binding
CmSPL18	Cse_sc011479.1_g020.1	2.66857	2.96716	2.4696	2.70178	1.75107	2.22481	1.36482	1.78023	0.65186	0.575914	0.38712	0.538298	SPL18	Squamosa promoter-binding-like protein 18	GO:0003677,GO:0005634,GO:0046872	DNA binding|nucleus|metal ion binding
CmSPL21	Cse_sc012685.1_g030.1	2.48791	2.5917	1.93834	2.33932	1.5082	1.30214	1.8163	1.54221	1.44138	0.729506	0.996937	1.05594	SPL2	Squamosa promoter-binding-like protein 2	GO:0003700,GO:0005634,GO:0006355,GO:0043565,GO:0044212,GO:0046872,GO:0048510,GO:0048653	DNA-binding transcription factor activity|nucleus|regulation of transcription, DNA-templated|sequence-specific DNA binding|transcription regulatory region DNA binding|metal ion binding|regulation of timing of transition from vegetative to reproductive phase|anther development
CmSPL22	Cse_sc013634.1_g020.1	3.2793	2.61315	1.83732	2.57659	0.359371	0.285812	0.104712	0.249965	0	0	0	0	SPL2	Squamosa promoter-binding-like protein 2	GO:0003700,GO:0005634,GO:0006355,GO:0043565,GO:0044212,GO:0046872,GO:0048510,GO:0048653	DNA-binding transcription factor activity|nucleus|regulation of transcription, DNA-templated|sequence-specific DNA binding|transcription regulatory region DNA binding|metal ion binding|regulation of timing of transition from vegetative to reproductive phase|anther development
CmSPL16	Cse_sc015518.1_g040.1	44.9836	49.1455	43.0111	45.7134	59.9407	61.4857	65.937	62.4545	34.9152	29.9247	31.9378	32.2592	SPL16	Squamosa promoter-binding-like protein 16	GO:0003700,GO:0005634,GO:0005886,GO:0006355,GO:0044212,GO:0046872	DNA-binding transcription factor activity|nucleus|plasma membrane|regulation of transcription, DNA-templated|transcription regulatory region DNA binding|metal ion binding
CmSPL4	Cse_sc016290.1_g030.1	0.352303	0.389325	0.121293	0.28764	0.505132	0	0.33136	0.278831	0	0	0	0	SPL4	Squamosa promoter-binding-like protein 4	GO:0003677,GO:0003700,GO:0005634,GO:0005737,GO:0006355,GO:0009908,GO:0010321,GO:0046872	DNA binding|DNA-binding transcription factor activity|nucleus|cytoplasm|regulation of transcription, DNA-templated|flower development|regulation of vegetative phase change|metal ion binding
CmSPL13B2	Cse_sc020435.1_g020.1	0.389876	0.813468	1.67767	0.960338	0.207502	0	0.311644	0.173049	0	0.0721197	0	0.0240399	SPL13B	Squamosa promoter-binding-like protein 13B	GO:0003677,GO:0005634,GO:0046872,GO:0048653	DNA binding|nucleus|metal ion binding|anther development
CmSPL8	Cse_sc021057.1_g010.1	17.5859	18.3997	22.6566	19.5474	3.08716	1.78054	2.32927	2.39899	0	0	0	0	SPL8	Squamosa promoter-binding-like protein 8	GO:0003677,GO:0005634,GO:0005737,GO:0009554,GO:0009556,GO:0030154,GO:0046872,GO:0048653	DNA binding|nucleus|cytoplasm|megasporogenesis|microsporogenesis|cell differentiation|metal ion binding|anther development
CmSPL13A	Cse_sc034317.1_g020.1	2.00537	3.04047	1.89857	2.3148	1.30945	1.1041	1.54481	1.31945	0	0	0.0743636	0.0247879	SPL13A	Squamosa promoter-binding-like protein 13A	GO:0003677,GO:0003700,GO:0005634,GO:0006355,GO:0046872,GO:0048653	DNA binding|DNA-binding transcription factor activity|nucleus|regulation of transcription, DNA-templated|metal ion binding|anther development
CmSPL1	Cse_sc043559.1_g020.1	41.5534	39.9478	37.3963	39.6325	33.45	38.7274	35.1977	35.7917	21.4949	20.5296	20.5824	20.869	SPL1	Squamosa promoter-binding-like protein 1	GO:0003677,GO:0003700,GO:0005634,GO:0006355,GO:0046872	DNA binding|DNA-binding transcription factor activity|nucleus|regulation of transcription, DNA-templated|metal ion binding
CmAGL241	Cse_sc005536.1_g070.1	0	0	0	0	3.29724	3.91772	3.79836	3.67111	5.54647	3.66266	3.70889	4.30601	AGL24	MADS-box protein AGL24	GO:0000060,GO:0000977,GO:0000982,GO:0003700,GO:0005634,GO:0005737,GO:0007275,GO:0008134,GO:0009739,GO:0010077,GO:0010220,GO:0030154,GO:0043565,GO:0044212,GO:0045893,GO:0045944,GO:0046982,GO:0048438,GO:0048510	protein import into nucleus, translocation|RNA polymerase II regulatory region sequence-specific DNA binding|transcription factor activity, RNA polymerase II proximal promoter sequence-specific DNA binding|DNA-binding transcription factor activity|nucleus|cytoplasm|multicellular organism development|transcription factor binding|response to gibberellin|maintenance of inflorescence meristem identit…
CmAGL242	Cse_sc005701.1_g040.1	0.0660941	0	0.270917	0.112337	0.627802	0.132989	0.257924	0.339572	7.48295	6.49999	7.49029	7.15774	AGL24	MADS-box protein AGL24	GO:0000060,GO:0000977,GO:0000982,GO:0003700,GO:0005634,GO:0005737,GO:0007275,GO:0008134,GO:0009739,GO:0010077,GO:0010220,GO:0030154,GO:0043565,GO:0044212,GO:0045893,GO:0045944,GO:0046982,GO:0048438,GO:0048510	protein import into nucleus, translocation|RNA polymerase II regulatory region sequence-specific DNA binding|transcription factor activity, RNA polymerase II proximal promoter sequence-specific DNA binding|DNA-binding transcription factor activity|nucleus|cytoplasm|multicellular organism development|transcription factor binding|response to gibberellin|maintenance of inflorescence meristem identit…
CmAGL243	Cse_sc008669.1_g010.1	20.3383	21.387	16.1618	19.2957	17.3134	19.7643	18.8267	18.6348	20.2843	30.1412	29.101	26.5088	AGL24	MADS-box protein AGL24	GO:0000060,GO:0000977,GO:0000982,GO:0003700,GO:0005634,GO:0005737,GO:0007275,GO:0008134,GO:0009739,GO:0010077,GO:0010220,GO:0030154,GO:0043565,GO:0044212,GO:0045893,GO:0045944,GO:0046982,GO:0048438,GO:0048510	protein import into nucleus, translocation|RNA polymerase II regulatory region sequence-specific DNA binding|transcription factor activity, RNA polymerase II proximal promoter sequence-specific DNA binding|DNA-binding transcription factor activity|nucleus|cytoplasm|multicellular organism development|transcription factor binding|response to gibberellin|maintenance of inflorescence meristem identit…	ko04022,ko04013	cGMP-PKG signaling pathway|MAPK signaling pathway - fly
CmLFY	Cse_sc013426.1_g020.1	0	0	0.0286879	0.00956263	0	0	0	0	0.0653146	0.0288831	0	0.0313992	LFY	leafy homolog	GO:0003677,GO:0005634,GO:0006355,GO:0007275	DNA binding|nucleus|regulation of transcription, DNA-templated|multicellular organism development
CmFD1	Cse_sc007050.1_g010.2	0.6223	0.9659	0.6265	0.738233	0.3617	0.4991	0.9478	0.602867	1.6008	1.0364	2.1547	1.5973	FD	bZIP transcription factor FD homolog [Chrysanthemum seticuspe f. boreale]	GO:0003677,GO:0003700,GO:0005634,GO:0010200,GO:0043621,GO:2000028	DNA binding|DNA-binding transcription factor activity|nucleus|response to chitin|protein self-association|regulation of photoperiodism, flowering
CmFD2	Cse_sc005752.1_g010.1	0.8161	0.6568	0.6054	0.692767	0.7943	0.227	0.2498	0.4237	1.1601	0.7211	1.4697	1.11697	FD	bZIP transcription factor FD homolog [Chrysanthemum seticuspe f. boreale]	GO:0003677,GO:0003700,GO:0005634,GO:0006355,GO:0009648,GO:0009909,GO:0009911,GO:0043621,GO:0045893,GO:2000028	DNA binding|DNA-binding transcription factor activity|nucleus|regulation of transcription, DNA-templated|photoperiodism|regulation of flower development|positive regulation of flower development|protein self-association|positive regulation of transcription, DNA-templated|regulation of photoperiodism, flowering
CmFD3	Cse_sc020036.1_g010.1	0	0	0	0	0.1044	0.7692	0.2736	0.3824	5.3374	3.9492	2.6496	3.97873	FD	bZIP transcription factor FD homolog [Chrysanthemum seticuspe f. boreale]	GO:0003677,GO:0003700,GO:0005634,GO:0006355,GO:0009648,GO:0009909,GO:0009911,GO:0043621,GO:0045893,GO:2000028	DNA binding|DNA-binding transcription factor activity|nucleus|regulation of transcription, DNA-templated|photoperiodism|regulation of flower development|positive regulation of flower development|protein self-association|positive regulation of transcription, DNA-templated|regulation of photoperiodism, flowering
CmFUL1	Cse_sc015774.1_g010.1	50.0262	51.7312	50.8435	50.867	10.6976	13.5067	13.8798	12.6947	63.7907	52.5488	98.7828	71.7074	FUL	APETALA1 and FRUITFULL like protein [Chrysanthemum seticuspe f. boreale]	GO:0000977,GO:0000982,GO:0003700,GO:0005634,GO:0007275,GO:0008134,GO:0009908,GO:0009911,GO:0010077,GO:0010154,GO:0030154,GO:0043565,GO:0044212,GO:0045944,GO:0046983,GO:0060560	RNA polymerase II regulatory region sequence-specific DNA binding|transcription factor activity, RNA polymerase II proximal promoter sequence-specific DNA binding|DNA-binding transcription factor activity|nucleus|multicellular organism development|transcription factor binding|flower development|positive regulation of flower development|maintenance of inflorescence meristem identity|fruit developm…
CmFUL2	Cse_sc015774.1_g010.2	1.1108	1.0518	0.1842	0.782267	0.0967	0	0.3167	0.1378	1.412	0.6095	1.3664	1.1293	FUL	APETALA1 and FRUITFULL like protein [Chrysanthemum seticuspe f. boreale]	GO:0000977,GO:0000982,GO:0003700,GO:0005634,GO:0007275,GO:0008134,GO:0009908,GO:0009911,GO:0010077,GO:0010154,GO:0030154,GO:0043565,GO:0044212,GO:0045944,GO:0046983,GO:0060560	RNA polymerase II regulatory region sequence-specific DNA binding|transcription factor activity, RNA polymerase II proximal promoter sequence-specific DNA binding|DNA-binding transcription factor activity|nucleus|multicellular organism development|transcription factor binding|flower development|positive regulation of flower development|maintenance of inflorescence meristem identity|fruit developm…
CmTFL1	Cse_sc000080.1_g010.1	0.2606	1.8354	0.551	0.882333	5.7359	2.1951	3.663	3.86467	0.1173	0.4862	0.0619	0.2218	TFL1	terminal flower 1-like protein [Chrysanthemum x morifolium]	GO:0005737	cytoplasm
CmAP11	Cse_sc006661.1_g030.1	8.27841	7.58863	11.4852	9.11741	3.01143	2.04124	1.91148	2.32138	18.7237	9.48008	9.62705	12.6103	AP1	Floral homeotic protein APETALA 1	GO:0000977,GO:0000982,GO:0003677,GO:0003700,GO:0005634,GO:0007275,GO:0008134,GO:0009908,GO:0009933,GO:0010582,GO:0030154,GO:0043565,GO:0044212,GO:0045893,GO:0045944,GO:0046982	RNA polymerase II regulatory region sequence-specific DNA binding|transcription factor activity, RNA polymerase II proximal promoter sequence-specific DNA binding|DNA binding|DNA-binding transcription factor activity|nucleus|multicellular organism development|transcription factor binding|flower development|meristem structural organization|floral meristem determinacy|cell differentiation|sequence-…
CmAP12	Cse_sc007234.1_g040.1	11.0908	11.6465	22.0858	14.941	28.3069	16.9118	17.7405	20.9864	30.4312	24.4034	22.0561	25.6302	AP1	Floral homeotic protein APETALA 1	GO:0000977,GO:0000982,GO:0003677,GO:0003700,GO:0005634,GO:0007275,GO:0008134,GO:0009908,GO:0009933,GO:0010582,GO:0030154,GO:0043565,GO:0044212,GO:0045893,GO:0045944,GO:0046982	RNA polymerase II regulatory region sequence-specific DNA binding|transcription factor activity, RNA polymerase II proximal promoter sequence-specific DNA binding|DNA binding|DNA-binding transcription factor activity|nucleus|multicellular organism development|transcription factor binding|flower development|meristem structural organization|floral meristem determinacy|cell differentiation|sequence-…
CmAP13	Cse_sc009032.1_g010.1	25.8042	26.8978	28.6407	27.1142	6.05257	4.82036	5.81825	5.56373	0.611962	1.78949	1.31392	1.23846	AP1	Floral homeotic protein APETALA 1	GO:0000977,GO:0000982,GO:0003677,GO:0003700,GO:0005634,GO:0007275,GO:0008134,GO:0009908,GO:0009933,GO:0010582,GO:0030154,GO:0043565,GO:0044212,GO:0045893,GO:0045944,GO:0046982	RNA polymerase II regulatory region sequence-specific DNA binding|transcription factor activity, RNA polymerase II proximal promoter sequence-specific DNA binding|DNA binding|DNA-binding transcription factor activity|nucleus|multicellular organism development|transcription factor binding|flower development|meristem structural organization|floral meristem determinacy|cell differentiation|sequence-…
CmAP14	Cse_sc010007.1_g010.1	140.565	125.303	176.879	147.582	115.709	119.138	96.0732	110.307	0.692505	0.817317	0.655849	0.72189	AP1	Floral homeotic protein APETALA 1	GO:0000977,GO:0000982,GO:0003677,GO:0003700,GO:0005634,GO:0007275,GO:0008134,GO:0009908,GO:0009933,GO:0010582,GO:0030154,GO:0043565,GO:0044212,GO:0045893,GO:0045944,GO:0046982	RNA polymerase II regulatory region sequence-specific DNA binding|transcription factor activity, RNA polymerase II proximal promoter sequence-specific DNA binding|DNA binding|DNA-binding transcription factor activity|nucleus|multicellular organism development|transcription factor binding|flower development|meristem structural organization|floral meristem determinacy|cell differentiation|sequence-…
CmSOC11	Cse_sc014932.1_g010.1	0.413211	0.621582	0.42403	0.486274	0.439518	0.696047	0.067413	0.400993	21.5811	14.6976	15.4213	17.2333	SOC1	MADS-box protein SOC1	GO:0000060,GO:0000977,GO:0000982,GO:0003700,GO:0005634,GO:0005737,GO:0007275,GO:0008134,GO:0009409,GO:0009739,GO:0009908,GO:0009909,GO:0009911,GO:0010048,GO:0010077,GO:0030154,GO:0043565,GO:0044212,GO:0045893,GO:0045944,GO:0046983	protein import into nucleus, translocation|RNA polymerase II regulatory region sequence-specific DNA binding|transcription factor activity, RNA polymerase II proximal promoter sequence-specific DNA binding|DNA-binding transcription factor activity|nucleus|cytoplasm|multicellular organism development|transcription factor binding|response to cold|response to gibberellin|flower development|regulatio…
CmSOC12	Cse_sc017768.1_g020.1	4.06599	3.6171	2.92602	3.53637	0.0774557	0.51831	0.919965	0.505244	42.1452	19.9512	20.6666	27.5877	SOC1	MADS-box protein SOC1	GO:0000060,GO:0000977,GO:0000982,GO:0003700,GO:0005634,GO:0005737,GO:0007275,GO:0008134,GO:0009409,GO:0009739,GO:0009908,GO:0009909,GO:0009911,GO:0010048,GO:0010077,GO:0030154,GO:0043565,GO:0044212,GO:0045893,GO:0045944,GO:0046983	protein import into nucleus, translocation|RNA polymerase II regulatory region sequence-specific DNA binding|transcription factor activity, RNA polymerase II proximal promoter sequence-specific DNA binding|DNA-binding transcription factor activity|nucleus|cytoplasm|multicellular organism development|transcription factor binding|response to cold|response to gibberellin|flower development|regulatio…
CmSOC13	Cse_sc029815.1_g010.1	1.3652	1.19078	0.611668	1.05588	0.765735	0.614255	0.341472	0.573821	12.895	14.1335	11.4391	12.8225	SOC1	MADS-box protein SOC1	GO:0000060,GO:0000977,GO:0000982,GO:0003700,GO:0005634,GO:0005737,GO:0007275,GO:0008134,GO:0009409,GO:0009739,GO:0009908,GO:0009909,GO:0009911,GO:0010048,GO:0010077,GO:0030154,GO:0043565,GO:0044212,GO:0045893,GO:0045944,GO:0046983	protein import into nucleus, translocation|RNA polymerase II regulatory region sequence-specific DNA binding|transcription factor activity, RNA polymerase II proximal promoter sequence-specific DNA binding|DNA-binding transcription factor activity|nucleus|cytoplasm|multicellular organism development|transcription factor binding|response to cold|response to gibberellin|flower development|regulatio…
CmAP21	Cse_sc005454.1_g020.1	22.4197	20.5941	23.1927	22.0688	10.8535	12.6623	11.411	11.6423	6.64189	3.74595	3.29044	4.55943	AP2	Floral homeotic protein APETALA 2	GO:0003677,GO:0003700,GO:0005634,GO:0009908,GO:0010073,GO:0010093,GO:0030154,GO:0048316,GO:0048481	DNA binding|DNA-binding transcription factor activity|nucleus|flower development|meristem maintenance|specification of floral organ identity|cell differentiation|seed development|plant ovule development
CmAP22	Cse_sc005866.1_g070.1	8.15216	10.6027	8.31345	9.02277	13.2049	15.4016	14.8265	14.4777	8.34422	7.18801	6.78463	7.43895	AP2	Floral homeotic protein APETALA 2	GO:0003677,GO:0003700,GO:0005634,GO:0009908,GO:0010073,GO:0010093,GO:0030154,GO:0048316,GO:0048481	DNA binding|DNA-binding transcription factor activity|nucleus|flower development|meristem maintenance|specification of floral organ identity|cell differentiation|seed development|plant ovule development
CmAP23	Cse_sc010431.1_g030.1	1.98926	2.7417	1.4812	2.07072	1.19925	1.82232	1.03153	1.35103	0.935309	0.806105	1.83792	1.19311	AP2	Floral homeotic protein APETALA 2	GO:0003677,GO:0003700,GO:0005634,GO:0009908,GO:0010073,GO:0010093,GO:0030154,GO:0048316,GO:0048481	DNA binding|DNA-binding transcription factor activity|nucleus|flower development|meristem maintenance|specification of floral organ identity|cell differentiation|seed development|plant ovule development
CmAP24	Cse_sc010656.1_g040.1	1.48677	1.14383	1.27395	1.30152	1.27851	2.91482	2.34244	2.17859	1.83044	1.21474	0.582459	1.20921	AP2	Floral homeotic protein APETALA 2	GO:0003677,GO:0003700,GO:0005634,GO:0009908,GO:0010073,GO:0010093,GO:0030154,GO:0048316,GO:0048481	DNA binding|DNA-binding transcription factor activity|nucleus|flower development|meristem maintenance|specification of floral organ identity|cell differentiation|seed development|plant ovule development
CmAG21	Cse_sc000289.1_g110.1	28.2788	25.2409	18.2491	23.9229	2.409	2.40531	2.38441	2.39957	0.815103	0.0824528	0.0718067	0.323121	AG2	Floral homeotic protein AGAMOUS	GO:0000977,GO:0003700,GO:0005634,GO:0045944,GO:0046983	RNA polymerase II regulatory region sequence-specific DNA binding|DNA-binding transcription factor activity|nucleus|positive regulation of transcription by RNA polymerase II|protein dimerization activity
CmAG22	Cse_sc033361.1_g010.1	218.654	218.171	195.879	210.901	6.64915	5.25194	6.96695	6.28935	0	0.0786178	0	0	AG2	Floral homeotic protein AGAMOUS	GO:0000977,GO:0003700,GO:0005634,GO:0045944,GO:0046983	RNA polymerase II regulatory region sequence-specific DNA binding|DNA-binding transcription factor activity|nucleus|positive regulation of transcription by RNA polymerase II|protein dimerization activity	0.0262059
CmTM6	Cse_sc000306.1_g020.1	5.2418	2.58047	2.09095	3.30441	0	0.211858	0.118348	0.110069	0	0	0	0	TM6	Floral homeotic protein PMADS 1/MADS-box protein GDEF	GO:0000977,GO:0003700,GO:0005634,GO:0007275,GO:0045944,GO:0046983	RNA polymerase II regulatory region sequence-specific DNA binding|DNA-binding transcription factor activity|nucleus|multicellular organism development|positive regulation of transcription by RNA polymerase II|protein dimerization activity
CmARF3	Cse_sc000044.1_g120.1	4.75977	4.67128	3.30475	4.24527	7.42868	6.34495	6.89125	6.88829	4.4193	2.98147	3.44409	3.61495	ARF3	Auxin response factor 3	GO:0003677,GO:0003700,GO:0005634,GO:0009733,GO:0009734,GO:0009850,GO:0010050,GO:0010158,GO:0010582	DNA binding|DNA-binding transcription factor activity|nucleus|response to auxin|auxin-activated signaling pathway|auxin metabolic process|vegetative phase change|abaxial cell fate specification|floral meristem determinacy	ko04075	Plant hormone signal transduction
CmSAUR50	Cse_sc000076.1_g130.1	4.4292	2.35276	2.35078	3.04425	4.93099	10.5442	10.8495	8.7749	0	0	0	0	SAUR50	Auxin-responsive protein SAUR50	GO:0009734,GO:0040008	auxin-activated signaling pathway|regulation of growth	ko04075	Plant hormone signal transduction
CmARF19	Cse_sc000082.1_g120.1	4.29978	5.38599	7.81556	5.83378	17.8094	13.2004	13.3357	14.7818	9.06016	5.30267	8.04244	7.46842	ARF19	Auxin response factor 19	GO:0003677,GO:0003700,GO:0005634,GO:0009723,GO:0009733,GO:0009734,GO:0010311,GO:0043565,GO:0046983,GO:0048366,GO:0048527	DNA binding|DNA-binding transcription factor activity|nucleus|response to ethylene|response to auxin|auxin-activated signaling pathway|lateral root formation|sequence-specific DNA binding|protein dimerization activity|leaf development|lateral root development	ko04075	Plant hormone signal transduction
CmIAA13	Cse_sc000098.1_g130.1	1.16578	1.24026	0.525826	0.977289	7.84218	16.279	12.4147	12.1786	0.105196	0.0804296	0.141008	0.108878	IAA13	Auxin-responsive protein IAA13	GO:0003700,GO:0005634,GO:0009733,GO:0009734	DNA-binding transcription factor activity|nucleus|response to auxin|auxin-activated signaling pathway	ko04075	Plant hormone signal transduction
CmIAA27	Cse_sc000245.1_g020.1	5.06644	3.73491	3.87385	4.22507	6.80545	11.8527	6.62299	8.42705	44.4592	22.7789	19.7213	28.9865	IAA27	Auxin-responsive protein IAA27	GO:0003700,GO:0005634,GO:0009733,GO:0009734	DNA-binding transcription factor activity|nucleus|response to auxin|auxin-activated signaling pathway	ko04075	Plant hormone signal transduction
CmIAA26	Cse_sc000403.1_g120.1	4.58343	3.8078	3.03755	3.80959	7.59761	14.2147	11.0639	10.9587	27.7422	29.1758	33.5391	30.1524	IAA26	Auxin-responsive protein IAA26	GO:0003700,GO:0005634,GO:0009733,GO:0009734	DNA-binding transcription factor activity|nucleus|response to auxin|auxin-activated signaling pathway	ko04075	Plant hormone signal transduction
CmARF18	Cse_sc000427.1_g100.1	2.66773	2.62669	3.66496	2.98646	2.11763	1.89033	2.14157	2.04984	3.48268	1.61386	2.11272	2.40309	ARF18	Auxin response factor 18	GO:0003677,GO:0005634,GO:0006355,GO:0009734	DNA binding|nucleus|regulation of transcription, DNA-templated|auxin-activated signaling pathway
CmIAA15	Cse_sc000604.1_g110.1	3.292	3.25684	1.19122	2.58002	0.99059	2.14737	1.24471	1.46089	0	0	0	0	IAA15	Auxin-responsive protein IAA15	GO:0005634,GO:0006355,GO:0009733,GO:0009734	nucleus|regulation of transcription, DNA-templated|response to auxin|auxin-activated signaling pathway	ko04075	Plant hormone signal transduction
CmT85	Cse_sc000623.1_g020.1	3.42022	4.85066	5.96501	4.7453	4.40695	3.97713	3.39351	3.92586	1.11004	1.83188	0.891665	1.27786	T85	Auxin-binding protein T85	GO:0005788,GO:0008270,GO:0009734,GO:0010011	endoplasmic reticulum lumen|zinc ion binding|auxin-activated signaling pathway|auxin binding
CmT85	Cse_sc000623.1_g030.1	2.3566	2.58311	1.37869	2.10613	0.909261	0.707829	1.42799	1.01503	2.53689	1.79918	2.45888	2.26498	T85	Auxin-binding protein T85	GO:0005788,GO:0008270,GO:0009734,GO:0010011	endoplasmic reticulum lumen|zinc ion binding|auxin-activated signaling pathway|auxin binding
CmIAA8	Cse_sc000720.1_g020.1	27.3099	26.1722	26.6896	26.7239	22.4136	26.3044	24.6348	24.4509	11.9137	15.3151	13.3268	13.5185	IAA8	Auxin-responsive protein IAA8	GO:0005634,GO:0006355,GO:0009734,GO:1901332	nucleus|regulation of transcription, DNA-templated|auxin-activated signaling pathway|negative regulation of lateral root development	ko04075	Plant hormone signal transduction
CmIAA8	Cse_sc000944.1_g080.1	107.894	86.0683	74.3318	89.4314	91.035	99.7938	94.471	95.0999	61.6809	82.0294	83.5897	75.7667	IAA8	Auxin-responsive protein IAA8	GO:0005634,GO:0006355,GO:0009734,GO:1901332	nucleus|regulation of transcription, DNA-templated|auxin-activated signaling pathway|negative regulation of lateral root development	ko04075	Plant hormone signal transduction
CmAUX22D	Cse_sc001690.1_g070.1	11.7633	7.26671	9.74875	9.59292	23.6083	35.3012	25.463	28.1242	2.05687	0	0.301968	0.786279	AUX22D	Auxin-induced protein 22D	GO:0005634,GO:0006355,GO:0009734	nucleus|regulation of transcription, DNA-templated|auxin-activated signaling pathway	ko04075	Plant hormone signal transduction
CmARF16	Cse_sc001697.1_g060.1	9.94907	16.5079	10.3397	12.2656	19.1897	19.4493	29.7023	22.7804	22.2673	24.1481	16.7515	21.0556	ARF16	Auxin response factor 16	GO:0003677,GO:0003700,GO:0005634,GO:0007389,GO:0009733,GO:0009734,GO:0035198,GO:0048829,GO:0051301	DNA binding|DNA-binding transcription factor activity|nucleus|pattern specification process|response to auxin|auxin-activated signaling pathway|miRNA binding|root cap development|cell division
CmARF15	Cse_sc001905.1_g020.1	0.975095	1.30775	0.616369	0.966405	0.860897	1.88167	2.26359	1.66872	1.72895	1.4909	0	1.07328	ARF15	Auxin response factor 15	GO:0003677,GO:0005634,GO:0006355,GO:0009734	DNA binding|nucleus|regulation of transcription, DNA-templated|auxin-activated signaling pathway	ko04075	Plant hormone signal transduction
CmIAA6	Cse_sc001990.1_g090.1	22.4308	14.476	11.6682	16.1917	5.33259	5.83921	5.25261	5.4748	0	0	0	0	IAA6	Auxin-induced protein IAA6	GO:0005634,GO:0006355,GO:0009734	nucleus|regulation of transcription, DNA-templated|auxin-activated signaling pathway	ko04075	Plant hormone signal transduction
CmARF8	Cse_sc002128.1_g060.1	21.5354	23.0463	22.9048	22.4955	17.1264	18.3036	16.8178	17.4159	3.8858	2.60174	2.78968	3.09241	ARF8	Auxin response factor 8	GO:0003700,GO:0005634,GO:0009733,GO:0009734,GO:0009908,GO:0043565	DNA-binding transcription factor activity|nucleus|response to auxin|auxin-activated signaling pathway|flower development|sequence-specific DNA binding
CmARF2B	Cse_sc002169.1_g030.1	27.7437	28.683	28.231	28.2192	23.465	31.0138	28.2439	27.5742	29.1603	30.6926	29.4861	29.7797	ARF2B	Auxin response factor 2B	GO:0003677,GO:0005634,GO:0006355,GO:0009734,GO:0009835	DNA binding|nucleus|regulation of transcription, DNA-templated|auxin-activated signaling pathway|fruit ripening
CmARF10	Cse_sc002402.1_g030.1	4.34559	6.04852	7.82143	6.07185	4.4239	4.3399	4.20415	4.32265	3.72738	3.75677	4.73365	4.0726	ARF10	Auxin response factor 10	GO:0003677,GO:0003700,GO:0005634,GO:0007389,GO:0009734,GO:0009738,GO:0009743,GO:0010154,GO:0031540,GO:0035198,GO:0048366,GO:0048441,GO:0048442,GO:0048589,GO:0048829,GO:0051301	DNA binding|DNA-binding transcription factor activity|nucleus|pattern specification process|auxin-activated signaling pathway|abscisic acid-activated signaling pathway|response to carbohydrate|fruit development|regulation of anthocyanin biosynthetic process|miRNA binding|leaf development|petal development|sepal development|developmental growth|root cap development|cell division
CmSAUR76	Cse_sc002594.1_g060.1	1.71838	0	1.79195	1.17011	2.81751	12.4333	7.33654	7.52912	0	0	0	0	SAUR76	Auxin-responsive protein SAUR76	GO:0005634,GO:0005737,GO:0007275,GO:0009733,GO:0009873,GO:0019897,GO:0030307	nucleus|cytoplasm|multicellular organism development|response to auxin|ethylene-activated signaling pathway|extrinsic component of plasma membrane|positive regulation of cell growth
CmSAUR23	Cse_sc002873.1_g080.1	2.82369	3.5475	0.887428	2.41954	1.514	0.289045	0.69134	0.831462	0.193593	0	0	0.064531	SAUR23	Auxin-responsive protein SAUR23	GO:0005886,GO:0007275,GO:0009734,GO:0040008	plasma membrane|multicellular organism development|auxin-activated signaling pathway|regulation of growth	ko04075	Plant hormone signal transduction
CmSAUR22	Cse_sc002894.1_g010.1	1.03341	2.23448	0.850413	1.37277	2.63202	1.46096	0.597273	1.56342	0.747862	0.69591	0.916313	0.786695	SAUR22	Auxin-responsive protein SAUR22	GO:0005886,GO:0007275,GO:0009734,GO:0040008	plasma membrane|multicellular organism development|auxin-activated signaling pathway|regulation of growth	ko04075	Plant hormone signal transduction
CmSAUR21	Cse_sc002894.1_g080.1	0.228183	1.77815	0.717721	0.908018	0.24817	0.244277	0	0.164149	0.58668	0	0.214409	0.26703	SAUR21	Auxin-responsive protein SAUR21	GO:0005886,GO:0007275,GO:0009734,GO:0040008	plasma membrane|multicellular organism development|auxin-activated signaling pathway|regulation of growth	ko04075	Plant hormone signal transduction
CmARF2A	Cse_sc002933.1_g050.1	29.9483	38.0723	42.8108	36.9438	45.9282	28.7645	39.1881	37.9603	88.84	58.6094	70.7459	72.7318	ARF2A	Auxin response factor 2A	GO:0003677,GO:0005634,GO:0006355,GO:0009734,GO:0009835,GO:0009836,GO:0009911,GO:0042803,GO:0046982	DNA binding|nucleus|regulation of transcription, DNA-templated|auxin-activated signaling pathway|fruit ripening|fruit ripening, climacteric|positive regulation of flower development|protein homodimerization activity|protein heterodimerization activity
CmARF1	Cse_sc002955.1_g020.1	0.315067	0.957114	0.877647	0.716609	0.227655	0.323117	0.709541	0.420104	1.11637	0.351708	0.102421	0.5235	ARF1	Auxin response factor 1	GO:0003677,GO:0003700,GO:0005634,GO:0009733,GO:0009734,GO:0010150,GO:0042802,GO:0045892	DNA binding|DNA-binding transcription factor activity|nucleus|response to auxin|auxin-activated signaling pathway|leaf senescence|identical protein binding|negative regulation of transcription, DNA-templated	ko04075	Plant hormone signal transduction
CmARF6	Cse_sc003827.1_g060.1	29.44	31.943	31.0872	30.8234	29.9013	37.8887	36.8269	34.8723	15.2738	10.6026	11.3361	12.4042	ARF6	Auxin response factor 6	GO:0003677,GO:0003700,GO:0005634,GO:0009733,GO:0009734,GO:0009908	DNA binding|DNA-binding transcription factor activity|nucleus|response to auxin|auxin-activated signaling pathway|flower development
CmARF4	Cse_sc004467.1_g060.1	8.01118	7.20697	6.12185	7.11333	19.218	24.569	22.7494	22.1788	6.78074	5.63956	6.39137	6.27056	ARF4	Auxin response factor 4	GO:0003677,GO:0003700,GO:0005634,GO:0009734,GO:0010050,GO:0010158	DNA binding|DNA-binding transcription factor activity|nucleus|auxin-activated signaling pathway|vegetative phase change|abaxial cell fate specification
CmARF15	Cse_sc004567.1_g010.1	0.637204	0.557048	0.353941	0.516064	0.130082	0.246933	0.451337	0.276117	0.648209	0.272988	0.508478	0.476558	ARF15	Auxin response factor 15	GO:0003677,GO:0005634,GO:0006355,GO:0009734	DNA binding|nucleus|regulation of transcription, DNA-templated|auxin-activated signaling pathway	ko04075	Plant hormone signal transduction
CmAUX22D	Cse_sc004591.1_g080.1	37.5592	38.6401	35.2197	37.1397	88.7936	143.197	108.072	113.354	5.66758	1.14894	2.02413	2.94688	AUX22D	Auxin-induced protein 22D	GO:0005634,GO:0006355,GO:0009734	nucleus|regulation of transcription, DNA-templated|auxin-activated signaling pathway	ko04075	Plant hormone signal transduction
CmSAUR32	Cse_sc005154.1_g060.1	14.4296	12.8401	12.5173	13.2623	74.2328	78.0867	87.0086	79.776	104.405	95.6497	85.4787	95.1778	SAUR32	Auxin-responsive protein SAUR32	GO:0005634,GO:0005737,GO:0007275,GO:0009734,GO:0040008,GO:1900140	nucleus|cytoplasm|multicellular organism development|auxin-activated signaling pathway|regulation of growth|regulation of seedling development	ko04075	Plant hormone signal transduction
CmARF15	Cse_sc005157.1_g020.1	1.07117	1.41022	0.886371	1.12259	0.463105	1.82844	1.01374	1.10176	1.05046	0.697173	0.589448	0.779027	ARF15	Auxin response factor 15	GO:0003677,GO:0005634,GO:0006355,GO:0009734	DNA binding|nucleus|regulation of transcription, DNA-templated|auxin-activated signaling pathway	ko04075	Plant hormone signal transduction
CmAFB2	Cse_sc005205.1_g030.1	11.643	9.94986	8.21678	9.93655	11.2832	12.6818	14.3244	12.7631	22.8447	21.9832	17.3279	20.7186	AFB2	Protein AUXIN SIGNALING F-BOX 2	GO:0000822,GO:0005634,GO:0005774,GO:0006952,GO:0009734,GO:0010011,GO:0010152,GO:0016567,GO:0019005,GO:0031146,GO:0048443	inositol hexakisphosphate binding|nucleus|vacuolar membrane|defense response|auxin-activated signaling pathway|auxin binding|pollen maturation|protein ubiquitination|SCF ubiquitin ligase complex|SCF-dependent proteasomal ubiquitin-dependent protein catabolic process|stamen development
CmSAUR64	Cse_sc005388.1_g020.1	6.03208	7.10434	8.03792	7.05811	11.1319	10.9487	8.62315	10.2346	3.11871	0	0.899118	1.33928	SAUR64	Auxin-responsive protein SAUR64	GO:0005886,GO:0007275,GO:0009734,GO:0009926,GO:0040008	plasma membrane|multicellular organism development|auxin-activated signaling pathway|auxin polar transport|regulation of growth
CmAXR4	Cse_sc006657.1_g100.1	3.14216	1.89953	1.87864	2.30678	1.0103	0.977543	0.8316	0.939814	0.184135	0.232429	0.455588	0.290717	AXR4	Protein AUXIN RESPONSE 4	GO:0005739,GO:0005774,GO:0005783,GO:0005789,GO:0009612,GO:0009733,GO:0009926,GO:0016021	mitochondrion|vacuolar membrane|endoplasmic reticulum|endoplasmic reticulum membrane|response to mechanical stimulus|response to auxin|auxin polar transport|integral component of membrane
CmARF4	Cse_sc007709.1_g020.1	8.28333	7.29436	5.22994	6.93588	7.50027	10.5234	9.64635	9.22334	11.0066	6.06346	7.00623	8.02543	ARF4	Auxin response factor 4	GO:0003677,GO:0003700,GO:0005634,GO:0009734,GO:0010050,GO:0010158	DNA binding|DNA-binding transcription factor activity|nucleus|auxin-activated signaling pathway|vegetative phase change|abaxial cell fate specification
CmIAA8	Cse_sc008101.1_g030.1	2.92788	2.22391	1.00098	2.05092	0.982699	1.13065	1.31224	1.14186	9.67355	7.90778	14.5793	10.7202	IAA8	Auxin-responsive protein IAA8	GO:0005634,GO:0006355,GO:0009734,GO:1901332	nucleus|regulation of transcription, DNA-templated|auxin-activated signaling pathway|negative regulation of lateral root development	ko04075	Plant hormone signal transduction
CmARF22	Cse_sc008209.1_g010.1	9.63055	9.2888	8.52504	9.14813	6.47634	8.35753	6.51399	7.11595	4.31034	3.61061	3.95113	3.95736	ARF22	Auxin response factor 22	GO:0003677,GO:0005634,GO:0006355,GO:0009734	DNA binding|nucleus|regulation of transcription, DNA-templated|auxin-activated signaling pathway
CmARF9	Cse_sc008348.1_g010.1	9.16687	11.5465	12.8444	11.1859	6.19573	5.17373	5.76329	5.71092	7.39778	4.7852	6.53635	6.23978	ARF9	Auxin response factor 9	GO:0003700,GO:0005634,GO:0009734,GO:0043565	DNA-binding transcription factor activity|nucleus|auxin-activated signaling pathway|sequence-specific DNA binding	ko04075	Plant hormone signal transduction
CmSAUR50	Cse_sc009013.1_g030.1	18.1545	13.6982	3.54249	11.7984	2.30733	0.942201	1.61583	1.62179	0	0	0	0	SAUR50	Auxin-responsive protein SAUR50	GO:0009734,GO:0040008	auxin-activated signaling pathway|regulation of growth	ko04075	Plant hormone signal transduction
CmSAUR50	Cse_sc011007.1_g020.1	26.3731	8.95154	3.31452	12.8797	15.1558	3.58493	4.48135	7.74069	0	0	0	0	SAUR50	Auxin-responsive protein SAUR50	GO:0009734,GO:0040008	auxin-activated signaling pathway|regulation of growth	ko04075	Plant hormone signal transduction
CmSAUR36	Cse_sc011667.1_g040.1	1.98479	0	0.827718	0.937503	10.4457	2.65054	2.25817	5.11814	1.74829	11.7917	10.3018	7.94726	SAUR36	Auxin-responsive protein SAUR36	GO:0005634,GO:0007275,GO:0009734,GO:0010029,GO:0040008,GO:1900057	nucleus|multicellular organism development|auxin-activated signaling pathway|regulation of seed germination|regulation of growth|positive regulation of leaf senescence	ko04075	Plant hormone signal transduction
CmSAUR36	Cse_sc011972.1_g090.1	47.6677	56.6399	64.7154	56.341	57.6552	82.7124	62.6582	67.6753	56.7647	103.725	143.93	101.473	SAUR36	Auxin-responsive protein SAUR36	GO:0005634,GO:0007275,GO:0009734,GO:0010029,GO:0040008,GO:1900057	nucleus|multicellular organism development|auxin-activated signaling pathway|regulation of seed germination|regulation of growth|positive regulation of leaf senescence	ko04075	Plant hormone signal transduction
CmAUX22D	Cse_sc012878.1_g050.1	55.7381	80.5835	56.2969	64.2062	77.0102	218.808	142.55	146.123	22.5141	12.9202	28.4016	21.2786	AUX22D	Auxin-induced protein 22D	GO:0005634,GO:0006355,GO:0009734	nucleus|regulation of transcription, DNA-templated|auxin-activated signaling pathway	ko04075	Plant hormone signal transduction
CmSAUR71	Cse_sc012984.1_g030.1	4.26891	5.63386	2.42282	4.10853	4.04046	2.249	3.12028	3.13658	8.38411	14.9171	11.6417	11.6476	SAUR71	Auxin-responsive protein SAUR71	GO:0005737,GO:0007275,GO:0009734,GO:0040008	cytoplasm|multicellular organism development|auxin-activated signaling pathway|regulation of growth	ko04075	Plant hormone signal transduction
CmABP19A	Cse_sc013168.1_g030.1	21.3659	38.0603	171.982	77.1361	19.1755	2.07662	2.86493	8.03902	0	0	0	0	ABP19A	Auxin-binding protein ABP19a	GO:0005618,GO:0009734,GO:0030145,GO:0045735,GO:0048046	cell wall|auxin-activated signaling pathway|manganese ion binding|nutrient reservoir activity|apoplast
CmSAUR76	Cse_sc013209.1_g090.1	3.17795	6.73449	4.96568	4.95937	18.3376	5.46717	13.6236	12.4761	0.768113	5.99331	9.88883	5.55008	SAUR76	Auxin-responsive protein SAUR76	GO:0005634,GO:0005737,GO:0007275,GO:0009733,GO:0009873,GO:0019897,GO:0030307	nucleus|cytoplasm|multicellular organism development|response to auxin|ethylene-activated signaling pathway|extrinsic component of plasma membrane|positive regulation of cell growth
CmIAA12	Cse_sc013776.1_g010.1	13.0594	21.1746	23.3896	19.2079	19.6867	16.0577	25.4284	20.3909	21.3617	12.3961	17.8479	17.2019	IAA12	Auxin-responsive protein IAA12	GO:0003700,GO:0005634,GO:0009734,GO:0009880,GO:0010051,GO:0045892,GO:0048364	DNA-binding transcription factor activity|nucleus|auxin-activated signaling pathway|embryonic pattern specification|xylem and phloem pattern formation|negative regulation of transcription, DNA-templated|root development	ko04075	Plant hormone signal transduction
CmARF5	Cse_sc014421.1_g050.1	8.32262	10.5106	10.182	9.67174	2.79076	2.24217	2.64321	2.55871	0.769301	0.729573	0.723384	0.740753	ARF5	Auxin response factor 5	GO:0003700,GO:0005634,GO:0006355,GO:0009733,GO:0009734,GO:0009793,GO:0009908,GO:0009942,GO:0010051,GO:0010305,GO:0016020,GO:0042802,GO:0044212,GO:0048364,GO:0048507	DNA-binding transcription factor activity|nucleus|regulation of transcription, DNA-templated|response to auxin|auxin-activated signaling pathway|embryo development ending in seed dormancy|flower development|longitudinal axis specification|xylem and phloem pattern formation|leaf vascular tissue pattern formation|membrane|identical protein binding|transcription regulatory region DNA binding|root de…	ko04075	Plant hormone signal transduction
CmABP19A	Cse_sc014458.1_g010.1	1.92966	4.08633	26.7761	10.9307	3.68376	0.769149	0.469369	1.64076	0	0	0	0	ABP19A	Auxin-binding protein ABP19a	GO:0005618,GO:0009734,GO:0030145,GO:0045735,GO:0048046	cell wall|auxin-activated signaling pathway|manganese ion binding|nutrient reservoir activity|apoplast
CmAFB2	Cse_sc014993.1_g020.1	0.532224	0.423647	0.413542	0.456471	0.142751	0.514621	0.431526	0.362966	0.283157	0.379597	0.363756	0.34217	AFB2	Protein AUXIN SIGNALING F-BOX 2	GO:0000822,GO:0005634,GO:0005774,GO:0006952,GO:0009734,GO:0010011,GO:0010152,GO:0016567,GO:0019005,GO:0031146,GO:0048443	inositol hexakisphosphate binding|nucleus|vacuolar membrane|defense response|auxin-activated signaling pathway|auxin binding|pollen maturation|protein ubiquitination|SCF ubiquitin ligase complex|SCF-dependent proteasomal ubiquitin-dependent protein catabolic process|stamen development	ko00940,ko00460,ko00500	Phenylpropanoid biosynthesis|Cyanoamino acid metabolism|Starch and sucrose metabolism
CmSAUR32	Cse_sc015046.1_g020.1	0	0	0	0	2.51557	0	1.07403	1.19653	1.95119	2.35398	1.744	2.01639	SAUR32	Auxin-responsive protein SAUR32	GO:0005634,GO:0005737,GO:0007275,GO:0009734,GO:0040008,GO:1900140	nucleus|cytoplasm|multicellular organism development|auxin-activated signaling pathway|regulation of growth|regulation of seedling development	ko04075	Plant hormone signal transduction
CmARF18	Cse_sc015495.1_g010.1	3.61644	2.74301	2.31663	2.89203	7.4781	8.53756	6.94875	7.6548	6.67844	6.33513	6.04393	6.3525	ARF18	Auxin response factor 18	GO:0003677,GO:0005634,GO:0006355,GO:0009734	DNA binding|nucleus|regulation of transcription, DNA-templated|auxin-activated signaling pathway
CmIAA27	Cse_sc015576.1_g020.1	3.21214	2.03077	2.94734	2.73008	1.46681	1.13748	0.931431	1.17857	1.2856	1.02024	0.563234	0.956358	IAA27	Auxin-responsive protein IAA27	GO:0003700,GO:0005634,GO:0009733,GO:0009734	DNA-binding transcription factor activity|nucleus|response to auxin|auxin-activated signaling pathway	ko04075	Plant hormone signal transduction
CmIAA14	Cse_sc015906.1_g020.1	30.1348	20.3619	16.8026	22.4331	105.175	172.105	128.369	135.216	38.2453	20.2426	27.6923	28.7267	IAA14	Auxin-responsive protein IAA14	GO:0003700,GO:0005634,GO:0009733,GO:0009734,GO:0010102,GO:0045892	DNA-binding transcription factor activity|nucleus|response to auxin|auxin-activated signaling pathway|lateral root morphogenesis|negative regulation of transcription, DNA-templated	ko04075	Plant hormone signal transduction
CmIAA16	Cse_sc016026.1_g020.1	11.3145	8.89799	8.84713	9.68654	99.996	150.029	125.071	125.032	24.3968	22.6258	24.2232	23.7486	IAA16	Auxin-responsive protein IAA16	GO:0003700,GO:0005634,GO:0009733,GO:0009734	DNA-binding transcription factor activity|nucleus|response to auxin|auxin-activated signaling pathway	ko04075	Plant hormone signal transduction
CmIAA17	Cse_sc016394.1_g060.1	8.07622	7.53507	10.9878	8.86636	7.76586	4.45185	3.58572	5.26781	0.6803	0.102434	0.323551	0.368762	IAA17	Auxin-responsive protein IAA17	GO:0003700,GO:0005634,GO:0009733,GO:0009734,GO:0042802,GO:1900057	DNA-binding transcription factor activity|nucleus|response to auxin|auxin-activated signaling pathway|identical protein binding|positive regulation of leaf senescence	ko04075	Plant hormone signal transduction
CmSAUR32	Cse_sc016654.1_g040.1	0.866967	0.384529	1.06131	0.770935	2.5493	2.48511	2.30851	2.44764	17.453	23.0691	18.6084	19.7102	SAUR32	Auxin-responsive protein SAUR32	GO:0005634,GO:0005737,GO:0007275,GO:0009734,GO:0040008,GO:1900140	nucleus|cytoplasm|multicellular organism development|auxin-activated signaling pathway|regulation of growth|regulation of seedling development	ko04075	Plant hormone signal transduction
CmAUX22D	Cse_sc017838.1_g020.1	13.2913	14.2152	14.892	14.1328	46.5824	40.655	36.5271	41.2548	37.8712	7.86973	21.8848	22.5419	AUX22D	Auxin-induced protein 22D	GO:0005634,GO:0006355,GO:0009734	nucleus|regulation of transcription, DNA-templated|auxin-activated signaling pathway	ko04075	Plant hormone signal transduction
CmSAUR21	Cse_sc018230.1_g010.1	10.915	8.16738	9.71416	9.59885	8.35362	8.84928	7.85499	8.35263	5.88892	5.99152	5.93437	5.93827	SAUR21	Auxin-responsive protein SAUR21	GO:0005886,GO:0007275,GO:0009734,GO:0040008	plasma membrane|multicellular organism development|auxin-activated signaling pathway|regulation of growth	ko04075	Plant hormone signal transduction
CmSAUR32	Cse_sc018631.1_g030.1	7.9219	8.23134	6.1567	7.43665	25.8969	20.7096	21.3148	22.6404	6.52173	27.6031	27.9315	20.6854	SAUR32	Auxin-responsive protein SAUR32	GO:0005634,GO:0005737,GO:0007275,GO:0009734,GO:0040008,GO:1900140	nucleus|cytoplasm|multicellular organism development|auxin-activated signaling pathway|regulation of growth|regulation of seedling development	ko04075	Plant hormone signal transduction
CmSAUR72	Cse_sc019378.1_g050.1	27.3467	38.6946	30.338	32.1264	25.458	23.3743	31.3705	26.7343	4.28449	34.6103	28.4309	22.4419	SAUR72	Auxin-responsive protein SAUR72	GO:0005737,GO:0007275,GO:0009734,GO:0040008	cytoplasm|multicellular organism development|auxin-activated signaling pathway|regulation of growth	ko04075	Plant hormone signal transduction
CmARF4	Cse_sc021365.1_g050.1	1.34407	1.56397	1.23104	1.37969	0.809116	1.14506	0.610729	0.854968	1.52933	0.635249	0.731934	0.965504	ARF4	Auxin response factor 4	GO:0003677,GO:0003700,GO:0005634,GO:0009734,GO:0010050,GO:0010158	DNA binding|DNA-binding transcription factor activity|nucleus|auxin-activated signaling pathway|vegetative phase change|abaxial cell fate specification
CmARF1	Cse_sc021498.1_g010.1	0.669404	0.377209	0.706282	0.584298	0.367168	0.118643	0	0.161937	0	0.366341	0.314482	0.226941	ARF1	Auxin response factor 1	GO:0003677,GO:0003700,GO:0005634,GO:0009733,GO:0009734,GO:0010150,GO:0042802,GO:0045892	DNA binding|DNA-binding transcription factor activity|nucleus|response to auxin|auxin-activated signaling pathway|leaf senescence|identical protein binding|negative regulation of transcription, DNA-templated	ko04075	Plant hormone signal transduction
CmARF9	Cse_sc021712.1_g020.1	17.9554	21.3663	22.0242	20.4486	16.6373	22.8334	21.0795	20.1834	35.9287	33.7539	35.9821	35.2216	ARF9	Auxin response factor 9	GO:0003700,GO:0005634,GO:0009734,GO:0043565	DNA-binding transcription factor activity|nucleus|auxin-activated signaling pathway|sequence-specific DNA binding	ko04075	Plant hormone signal transduction
CmARF1	Cse_sc021763.1_g030.1	23.2482	23.2453	20.0525	22.182	13.7063	16.1857	17.3291	15.7404	16.0979	13.3369	14.2593	14.5647	ARF1	Auxin response factor 1	GO:0003677,GO:0003700,GO:0005634,GO:0009733,GO:0009734,GO:0010150,GO:0042802,GO:0045892	DNA binding|DNA-binding transcription factor activity|nucleus|response to auxin|auxin-activated signaling pathway|leaf senescence|identical protein binding|negative regulation of transcription, DNA-templated	ko04075	Plant hormone signal transduction
CmARF19	Cse_sc021802.1_g030.1	5.68684	5.20254	3.86132	4.9169	4.14172	11.4161	8.68841	8.08208	3.02707	1.582	2.49612	2.3684	ARF19	Auxin response factor 19	GO:0003677,GO:0005634,GO:0006355,GO:0009734	DNA binding|nucleus|regulation of transcription, DNA-templated|auxin-activated signaling pathway
CmIAA13	Cse_sc021978.1_g010.1	48.9048	43.1163	43.7854	45.2688	47.0004	65.4647	39.0159	50.4937	15.7129	12.4286	17.337	15.1595	IAA13	Auxin-responsive protein IAA13	GO:0003700,GO:0005634,GO:0009733,GO:0009734	DNA-binding transcription factor activity|nucleus|response to auxin|auxin-activated signaling pathway	ko04075	Plant hormone signal transduction
CmSAUR36	Cse_sc022888.1_g040.1	1.42484	1.61239	1.4913	1.50951	2.75901	4.52026	5.00799	4.09575	14.0018	25.2537	32.9233	24.0596	SAUR36	Auxin-responsive protein SAUR36	GO:0005634,GO:0007275,GO:0009734,GO:0010029,GO:0040008,GO:1900057	nucleus|multicellular organism development|auxin-activated signaling pathway|regulation of seed germination|regulation of growth|positive regulation of leaf senescence	ko04075	Plant hormone signal transduction
CmSAUR36	Cse_sc023585.1_g010.1	9.96121	4.63588	4.11568	6.23759	0.306067	0	0.268497	0.191521	8.87551	2.78769	3.64021	5.10114	SAUR36	Auxin-responsive protein SAUR36	GO:0005634,GO:0007275,GO:0009734,GO:0010029,GO:0040008,GO:1900057	nucleus|multicellular organism development|auxin-activated signaling pathway|regulation of seed germination|regulation of growth|positive regulation of leaf senescence	ko04075	Plant hormone signal transduction
CmARF19	Cse_sc024163.1_g030.1	20.1568	21.9867	22.0781	21.4072	35.2447	54.9906	47.8111	46.0155	14.1192	11.9327	13.8946	13.3155	ARF19	Auxin response factor 19	GO:0003677,GO:0005634,GO:0006355,GO:0009734	DNA binding|nucleus|regulation of transcription, DNA-templated|auxin-activated signaling pathway
CmSAUR76	Cse_sc024800.1_g010.1	0	0	8.61594	2.87198	12.7193	2.848	1.57504	5.71411	0.797495	5.34808	3.42774	3.1911	SAUR76	Auxin-responsive protein SAUR76	GO:0005634,GO:0005737,GO:0007275,GO:0009733,GO:0009873,GO:0019897,GO:0030307	nucleus|cytoplasm|multicellular organism development|response to auxin|ethylene-activated signaling pathway|extrinsic component of plasma membrane|positive regulation of cell growth
CmSAUR76	Cse_sc024800.1_g040.1	0	7.57091	3.30392	3.62494	9.58024	1.8173	6.05615	5.8179	0	0.858285	7.95441	2.93757	SAUR76	Auxin-responsive protein SAUR76	GO:0005634,GO:0005737,GO:0007275,GO:0009733,GO:0009873,GO:0019897,GO:0030307	nucleus|cytoplasm|multicellular organism development|response to auxin|ethylene-activated signaling pathway|extrinsic component of plasma membrane|positive regulation of cell growth
CmIAA27	Cse_sc025517.1_g010.1	9.81428	12.4926	15.2643	12.5237	7.2654	14.8321	9.56329	10.5536	5.77567	6.14351	6.84939	6.25619	IAA27	Auxin-responsive protein IAA27	GO:0003700,GO:0005634,GO:0009733,GO:0009734	DNA-binding transcription factor activity|nucleus|response to auxin|auxin-activated signaling pathway	ko04075	Plant hormone signal transduction
CmARF18	Cse_sc026284.1_g010.1	5.40119	5.43031	6.25503	5.69551	7.21364	8.57836	7.59366	7.79522	21.6311	17.3533	18.0933	19.0259	ARF18	Auxin response factor 18	GO:0003677,GO:0003700,GO:0005634,GO:0009734	DNA binding|DNA-binding transcription factor activity|nucleus|auxin-activated signaling pathway	ko04075	Plant hormone signal transduction
CmARF19	Cse_sc027838.1_g020.1	3.49124	3.40187	3.55758	3.48356	2.84314	3.7697	2.97142	3.19475	1.74091	1.44201	1.12903	1.43732	ARF19	Auxin response factor 19	GO:0003677,GO:0005634,GO:0006355,GO:0009734	DNA binding|nucleus|regulation of transcription, DNA-templated|auxin-activated signaling pathway
CmIAA1	Cse_sc029499.1_g010.1	0.382634	0.60592	0.502853	0.497136	0.234053	0.448303	0.522241	0.401532	0	0.177695	0.155136	0.110944	IAA1	Auxin-responsive protein IAA1	GO:0005634,GO:0006355,GO:0009733,GO:0009734	nucleus|regulation of transcription, DNA-templated|response to auxin|auxin-activated signaling pathway	ko04075	Plant hormone signal transduction
CmSAUR23	Cse_sc031903.1_g020.1	15.153	10.7999	10.8224	12.2584	2.84576	18.173	5.0557	8.69149	4.03522	2.75761	11.9213	6.23804	SAUR23	Auxin-responsive protein SAUR23	GO:0005886,GO:0007275,GO:0009734,GO:0040008	plasma membrane|multicellular organism development|auxin-activated signaling pathway|regulation of growth	ko04075	Plant hormone signal transduction
CmSAUR77	Cse_sc033037.1_g020.1	1.98646	5.66086	8.21251	5.28661	2.56001	13.2346	9.38834	8.39432	0	0	0.715067	0.238356	SAUR77	Auxin-responsive protein SAUR77	GO:0005634,GO:0005737,GO:0007275,GO:0009733,GO:0009873,GO:0019897,GO:0030307	nucleus|cytoplasm|multicellular organism development|response to auxin|ethylene-activated signaling pathway|extrinsic component of plasma membrane|positive regulation of cell growth
CmAUX22D	Cse_sc034665.1_g010.1	6.03457	14.8198	11.7089	10.8544	18.2522	31.638	18.534	22.8081	5.8274	3.91599	8.02746	5.92362	AUX22D	Auxin-induced protein 22D	GO:0005634,GO:0006355,GO:0009734	nucleus|regulation of transcription, DNA-templated|auxin-activated signaling pathway	ko04075	Plant hormone signal transduction
CmARF8	Cse_sc035538.1_g010.1	47.5603	55.008	66.8833	56.4839	81.42	60.4292	80.7894	74.2129	47.82	31.3042	35.4294	38.1845	ARF8	Auxin response factor 8	GO:0003700,GO:0005634,GO:0009733,GO:0009734,GO:0009908,GO:0043565	DNA-binding transcription factor activity|nucleus|response to auxin|auxin-activated signaling pathway|flower development|sequence-specific DNA binding
CmSAUR23	Cse_sc037402.1_g010.1	0.558967	0.457388	0.502968	0.506441	0.345563	0.331145	0.0782021	0.251637	0	0.0913598	0.0790669	0.0568089	SAUR23	Auxin-responsive protein SAUR23	GO:0005886,GO:0007275,GO:0009734,GO:0040008	plasma membrane|multicellular organism development|auxin-activated signaling pathway|regulation of growth
CmPCNT115	Cse_sc037479.1_g010.1	0.0913157	0.104038	0.0943829	0.0965789	2.70757	1.7722	3.2586	2.57946	0.503382	1.63576	0.893997	1.01105	PCNT115	Auxin-induced protein PCNT115	GO:0009734,GO:0016491	auxin-activated signaling pathway|oxidoreductase activity
CmIAA6	Cse_sc038647.1_g020.1	44.1808	38.8243	46.1273	43.0441	18.1244	17.8609	17.1272	17.7042	7.20285	1.01428	4.84813	4.35509	IAA6	Auxin-induced protein IAA6	GO:0005634,GO:0006355,GO:0009734	nucleus|regulation of transcription, DNA-templated|auxin-activated signaling pathway	ko04075	Plant hormone signal transduction
CmARF18	Cse_sc041899.1_g010.1	0.272827	0.270583	0.139976	0.227795	0.0358868	0.0342079	0	0.0233649	0.799968	0.224088	0.230124	0.41806	ARF18	Auxin response factor 18	GO:0003677,GO:0005634,GO:0006355,GO:0009734	DNA binding|nucleus|regulation of transcription, DNA-templated|auxin-activated signaling pathway
CmSAUR67	Cse_sc041943.1_g010.1	0.795969	0.841214	0.824056	0.820413	0.878907	1.79026	2.23219	1.63379	0	0	0	0	SAUR67	Auxin-responsive protein SAUR67	GO:0005886,GO:0007275,GO:0009734,GO:0009926,GO:0040008	plasma membrane|multicellular organism development|auxin-activated signaling pathway|auxin polar transport|regulation of growth
CmARF12	Cse_sc044733.1_g010.1	0.515122	0.695879	0.266573	0.492525	0.275773	0.477644	0.292103	0.348507	0.672376	0.167359	0.443659	0.427798	ARF12	Auxin response factor 12	GO:0003677,GO:0005634,GO:0006355,GO:0009734	DNA binding|nucleus|regulation of transcription, DNA-templated|auxin-activated signaling pathway
CmARF2B	Cse_sc058989.1_g010.1	2.82488	3.73226	2.12981	2.89565	1.52076	3.40915	1.51817	2.14936	5.14272	3.15877	2.96593	3.75581	ARF2B	Auxin response factor 2B	GO:0003677,GO:0005634,GO:0006355,GO:0009734,GO:0009835	DNA binding|nucleus|regulation of transcription, DNA-templated|auxin-activated signaling pathway|fruit ripening
CmSAUR67	Cse_sc062567.1_g010.1	0	4.51571	2.65605	2.39059	4.61998	0.958123	1.60943	2.39584	0	0.919587	2.85562	1.2584	SAUR67	Auxin-responsive protein SAUR67	GO:0005886,GO:0007275,GO:0009734,GO:0009926,GO:0040008	plasma membrane|multicellular organism development|auxin-activated signaling pathway|auxin polar transport|regulation of growth
CmARF15	Cse_sc080960.1_g020.1	29.4436	26.4571	19.577	25.1592	15.7239	11.3478	17.1093	14.727	12.5422	8.43502	15.5734	12.1835	ARF15	Auxin response factor 15	GO:0003677,GO:0005634,GO:0006355,GO:0009734	DNA binding|nucleus|regulation of transcription, DNA-templated|auxin-activated signaling pathway	ko04075	Plant hormone signal transduction
CmARF18	Cse_sc087799.1_g010.1	0.432391	0.277521	0.763786	0.491233	0.0660362	0	0	0.0220121	1.65298	0.469413	1.04226	1.05488	ARF18	Auxin response factor 18	GO:0003677,GO:0005634,GO:0006355,GO:0009734	DNA binding|nucleus|regulation of transcription, DNA-templated|auxin-activated signaling pathway
CmARF16	Cse_sc333044.1_g010.1	0.660946	0.959905	1.14124	0.920697	0.240648	0	0	0.080216	2.14671	1.42359	2.82911	2.13314	ARF16	Auxin response factor 16	GO:0003677,GO:0003700,GO:0005634,GO:0007389,GO:0009733,GO:0009734,GO:0035198,GO:0048829,GO:0051301	DNA binding|DNA-binding transcription factor activity|nucleus|pattern specification process|response to auxin|auxin-activated signaling pathway|miRNA binding|root cap development|cell division
CmLOG5	Cse_sc000111.1_g150.1	1.91453	2.32388	0.510375	1.58293	1.58362	1.10467	2.90347	1.86392	10.9815	20.3391	18.1569	16.4925	LOG5	Cytokinin riboside 5'-monophosphate phosphoribohydrolase LOG5	GO:0005634,GO:0005829,GO:0009691,GO:0016799	nucleus|cytosol|cytokinin biosynthetic process|hydrolase activity, hydrolyzing N-glycosyl compounds
CmCKX3	Cse_sc000607.1_g100.1	0.518896	0.599641	0.249718	0.456085	0.042533	0.120785	0.154418	0.105912	0.194136	0	0.403144	0.199093	CKX3	Cytokinin dehydrogenase 3	GO:0005773,GO:0005783,GO:0008131,GO:0009823,GO:0019139,GO:0071949	vacuole|endoplasmic reticulum|primary amine oxidase activity|cytokinin catabolic process|cytokinin dehydrogenase activity|FAD binding	ko00908	Zeatin biosynthesis
CmCKX1	Cse_sc002022.1_g030.1	89.9037	86.0247	60.1007	78.6764	7.78455	4.60755	8.70024	7.03078	0.52241	4.35153	1.20007	2.02467	CKX1	Cytokinin dehydrogenase 1	GO:0005773,GO:0009823,GO:0019139,GO:0048507,GO:0071949	vacuole|cytokinin catabolic process|cytokinin dehydrogenase activity|meristem development|FAD binding	ko00908	Zeatin biosynthesis
CmLOG8	Cse_sc002379.1_g010.1	2.26595	2.25498	2.89491	2.47195	3.80119	2.32386	2.66547	2.93017	0.735773	1.70968	1.41736	1.2876	LOG8	Cytokinin riboside 5'-monophosphate phosphoribohydrolase LOG8	GO:0005634,GO:0005829,GO:0009691,GO:0016799,GO:0042803	nucleus|cytosol|cytokinin biosynthetic process|hydrolase activity, hydrolyzing N-glycosyl compounds|protein homodimerization activity
CmCKX6	Cse_sc006062.1_g030.1	0.850329	0.483157	0.915269	0.749585	0.247846	0.45016	0.514409	0.404138	0.571612	0.70701	0.646631	0.641751	CKX6	Cytokinin dehydrogenase 6	GO:0005615,GO:0009690,GO:0010103,GO:0019139,GO:0071949	extracellular space|cytokinin metabolic process|stomatal complex morphogenesis|cytokinin dehydrogenase activity|FAD binding	ko00908	Zeatin biosynthesis
CmCKX7	Cse_sc008490.1_g060.1	8.88284	7.01789	6.86583	7.58885	22.3408	9.85748	16.1874	16.1286	8.57127	14.1377	10.5595	11.0895	CKX7	Cytokinin dehydrogenase 7	GO:0009823,GO:0019139,GO:0071949	cytokinin catabolic process|cytokinin dehydrogenase activity|FAD binding	ko00908	Zeatin biosynthesis
CmCKX3	Cse_sc010248.1_g020.1	3.09929	2.1024	4.52273	3.24147	0.511603	0.0820891	0	0.197897	0	0	0	0	CKX3	Cytokinin dehydrogenase 3	GO:0005773,GO:0005783,GO:0008131,GO:0009823,GO:0019139,GO:0071949	vacuole|endoplasmic reticulum|primary amine oxidase activity|cytokinin catabolic process|cytokinin dehydrogenase activity|FAD binding	ko00908	Zeatin biosynthesis
CmLOG3	Cse_sc011116.1_g010.1	12.6458	5.74326	8.12337	8.83748	7.15373	44.4946	17.8533	23.1672	13.7598	16.0359	25.6023	18.466	LOG3	Cytokinin riboside 5'-monophosphate phosphoribohydrolase LOG3	GO:0005634,GO:0005829,GO:0009691,GO:0016799	nucleus|cytosol|cytokinin biosynthetic process|hydrolase activity, hydrolyzing N-glycosyl compounds
CmCKX3	Cse_sc011286.1_g010.1	1.30288	0.845551	1.49705	1.21516	0.125179	0.133063	0.0707126	0.109652	0	0	0.0289786	0.00965953	CKX3	Cytokinin dehydrogenase 3	GO:0005773,GO:0005783,GO:0008131,GO:0009823,GO:0019139,GO:0071949	vacuole|endoplasmic reticulum|primary amine oxidase activity|cytokinin catabolic process|cytokinin dehydrogenase activity|FAD binding	ko00908	Zeatin biosynthesis
CmCYP735A2	Cse_sc012047.1_g010.1	0.473161	0.824505	1.17562	0.824429	0.0312752	0	0.0844183	0.0385645	0.279199	0.314569	0.137085	0.243618	CYP735A2	Cytokinin hydroxylase	GO:0004497,GO:0005506,GO:0009506,GO:0016021,GO:0016705,GO:0020037,GO:0033466	monooxygenase activity|iron ion binding|plasmodesma|integral component of membrane|oxidoreductase activity, acting on paired donors, with incorporation or reduction of molecular oxygen|heme binding|trans-zeatin biosynthetic process
CmLOG7	Cse_sc015353.1_g020.1	0.191428	0.141815	0	0.111081	0.0687929	0.876012	0.303649	0.416151	0	0	0	0	LOG7	Cytokinin riboside 5'-monophosphate phosphoribohydrolase LOG7	GO:0005634,GO:0005829,GO:0009691,GO:0016799	nucleus|cytosol|cytokinin biosynthetic process|hydrolase activity, hydrolyzing N-glycosyl compounds
CmCKX5	Cse_sc020204.1_g050.1	2.86692	2.76181	4.00033	3.20969	1.68311	1.30428	1.10408	1.36382	3.409	3.78599	3.25859	3.48453	CKX5	Cytokinin dehydrogenase 5	GO:0005576,GO:0005615,GO:0009823,GO:0019139,GO:0071949	extracellular region|extracellular space|cytokinin catabolic process|cytokinin dehydrogenase activity|FAD binding	ko00908	Zeatin biosynthesis
CmLOG3	Cse_sc024475.1_g010.1	2.74564	1.8778	1.53917	2.0542	2.05288	3.02122	3.0234	2.69917	2.09163	2.98398	2.53946	2.53836	LOG3	Cytokinin riboside 5'-monophosphate phosphoribohydrolase LOG3	GO:0005634,GO:0005829,GO:0009691,GO:0016799	nucleus|cytosol|cytokinin biosynthetic process|hydrolase activity, hydrolyzing N-glycosyl compounds
CmCKX5	Cse_sc024802.1_g010.1	9.43574	7.01502	4.58412	7.01163	2.52209	9.7364	6.58563	6.28137	0	0.0293995	0.0262077	0.0185357	CKX5	Cytokinin dehydrogenase 5	GO:0005576,GO:0005615,GO:0009823,GO:0019139,GO:0071949	extracellular region|extracellular space|cytokinin catabolic process|cytokinin dehydrogenase activity|FAD binding	ko00908	Zeatin biosynthesis
CmCYP735A2	Cse_sc025196.1_g010.1	0.782754	1.03119	0.372136	0.728693	0	0.0608082	0	0.0202694	0	0.0330897	0	0.0110299	CYP735A2	Cytokinin hydroxylase	GO:0004497,GO:0005506,GO:0009506,GO:0016021,GO:0016705,GO:0020037,GO:0033466	monooxygenase activity|iron ion binding|plasmodesma|integral component of membrane|oxidoreductase activity, acting on paired donors, with incorporation or reduction of molecular oxygen|heme binding|trans-zeatin biosynthetic process	ko00908	Zeatin biosynthesis
CmLOG5	Cse_sc027041.1_g020.1	0.370754	0.296248	0.435264	0.367422	0	0	0.099839	0.0332797	1.55195	0.897346	1.52437	1.32456	LOG5	Cytokinin riboside 5'-monophosphate phosphoribohydrolase LOG5	GO:0005634,GO:0005829,GO:0009691,GO:0016799	nucleus|cytosol|cytokinin biosynthetic process|hydrolase activity, hydrolyzing N-glycosyl compounds
CmCKX3	Cse_sc039138.1_g020.1	0.0328385	0.0373474	0.20425	0.0914786	0.174689	0.066517	0.15733	0.132845	0.104516	0	0.0326135	0.0457098	CKX3	Cytokinin dehydrogenase 3	GO:0005773,GO:0005783,GO:0008131,GO:0009823,GO:0019139,GO:0071949	vacuole|endoplasmic reticulum|primary amine oxidase activity|cytokinin catabolic process|cytokinin dehydrogenase activity|FAD binding	ko00908	Zeatin biosynthesis
CmCAR10	Cse_sc001633.1_g100.1	7.22622	4.38569	2.00083	4.53758	0.25905	0	0	0.08635	0	0	0	0	CAR10	Protein C2-DOMAIN ABA-RELATED 10	GO:0005096,GO:0005543,GO:0005634,GO:0005773,GO:0005886,GO:0009738,GO:0009789,GO:0043547,GO:0046872	GTPase activator activity|phospholipid binding|nucleus|vacuole|plasma membrane|abscisic acid-activated signaling pathway|positive regulation of abscisic acid-activated signaling pathway|positive regulation of GTPase activity|metal ion binding
CmCAR4	Cse_sc002261.1_g060.1	9.26958	25.6855	28.8223	21.2591	51.1816	20.5292	49.0325	40.2478	12.727	10.3633	13.252	12.1141	CAR4	Protein C2-DOMAIN ABA-RELATED 4	GO:0005096,GO:0005543,GO:0005634,GO:0005829,GO:0005886,GO:0006952,GO:0009651,GO:0009738,GO:0009789,GO:0043547,GO:0046872,GO:1901002,GO:1902479	GTPase activator activity|phospholipid binding|nucleus|cytosol|plasma membrane|defense response|response to salt stress|abscisic acid-activated signaling pathway|positive regulation of abscisic acid-activated signaling pathway|positive regulation of GTPase activity|metal ion binding|positive regulation of response to salt stress|positive regulation of defense response to bacterium, incompatible i…
CmCAR5	Cse_sc007210.1_g040.1	5.03385	4.6312	1.62899	3.76468	0	0	0	0	0	0	0	0	CAR5	Protein C2-DOMAIN ABA-RELATED 5	GO:0005096,GO:0005543,GO:0005634,GO:0005886,GO:0009738,GO:0009789,GO:0043547,GO:0046872	GTPase activator activity|phospholipid binding|nucleus|plasma membrane|abscisic acid-activated signaling pathway|positive regulation of abscisic acid-activated signaling pathway|positive regulation of GTPase activity|metal ion binding
CmCAR4	Cse_sc007831.1_g030.1	93.1301	116.457	101.071	103.553	157.048	157.304	166.873	160.408	57.1881	126.212	153.542	112.314	CAR4	Protein C2-DOMAIN ABA-RELATED 4	GO:0005096,GO:0005543,GO:0005634,GO:0005829,GO:0005886,GO:0006952,GO:0009651,GO:0009738,GO:0009789,GO:0043547,GO:0046872,GO:1901002,GO:1902479	GTPase activator activity|phospholipid binding|nucleus|cytosol|plasma membrane|defense response|response to salt stress|abscisic acid-activated signaling pathway|positive regulation of abscisic acid-activated signaling pathway|positive regulation of GTPase activity|metal ion binding|positive regulation of response to salt stress|positive regulation of defense response to bacterium, incompatible i…
CmCAR5	Cse_sc010225.1_g030.1	0.986057	1.08394	0.342986	0.804328	0.357305	0	0	0.119102	0	0	0	0	CAR5	Protein C2-DOMAIN ABA-RELATED 5	GO:0005096,GO:0005543,GO:0005634,GO:0005886,GO:0009738,GO:0009789,GO:0043547,GO:0046872	GTPase activator activity|phospholipid binding|nucleus|plasma membrane|abscisic acid-activated signaling pathway|positive regulation of abscisic acid-activated signaling pathway|positive regulation of GTPase activity|metal ion binding
CmCAR4	Cse_sc010655.1_g030.1	3.18838	2.61517	0.704598	2.16938	0	0	0	0	0	0	0	0	CAR4	Protein C2-DOMAIN ABA-RELATED 4	GO:0005096,GO:0005543,GO:0005634,GO:0005829,GO:0005886,GO:0006952,GO:0009651,GO:0009738,GO:0009789,GO:0043547,GO:0046872,GO:1901002,GO:1902479	GTPase activator activity|phospholipid binding|nucleus|cytosol|plasma membrane|defense response|response to salt stress|abscisic acid-activated signaling pathway|positive regulation of abscisic acid-activated signaling pathway|positive regulation of GTPase activity|metal ion binding|positive regulation of response to salt stress|positive regulation of defense response to bacterium, incompatible i…
CmCAR4	Cse_sc015964.1_g020.1	22.4129	15.2604	10.132	15.9351	2.30322	1.32165	2.21051	1.94513	0.982458	0.443302	0.388737	0.604832	CAR4	Protein C2-DOMAIN ABA-RELATED 4	GO:0005096,GO:0005543,GO:0005634,GO:0005829,GO:0005886,GO:0006952,GO:0009651,GO:0009738,GO:0009789,GO:0043547,GO:0046872,GO:1901002,GO:1902479	GTPase activator activity|phospholipid binding|nucleus|cytosol|plasma membrane|defense response|response to salt stress|abscisic acid-activated signaling pathway|positive regulation of abscisic acid-activated signaling pathway|positive regulation of GTPase activity|metal ion binding|positive regulation of response to salt stress|positive regulation of defense response to bacterium, incompatible i…
CmCAR1	Cse_sc016913.1_g020.1	32.0471	28.0065	32.0583	30.704	39.695	43.4811	39.1248	40.767	29.712	33.8739	24.0371	29.2077	CAR1	Protein C2-DOMAIN ABA-RELATED 1	GO:0005096,GO:0005543,GO:0005634,GO:0005886,GO:0009738,GO:0009789,GO:0043547,GO:0046872	GTPase activator activity|phospholipid binding|nucleus|plasma membrane|abscisic acid-activated signaling pathway|positive regulation of abscisic acid-activated signaling pathway|positive regulation of GTPase activity|metal ion binding
CmAIB	Cse_sc019012.1_g020.1	32.7922	35.9737	40.2621	36.3427	25.1893	22.3556	21.0382	22.861	16.5801	22.8012	28.2104	22.5306	AIB	Transcription factor ABA-INDUCIBLE bHLH-TYPE	GO:0003677,GO:0003700,GO:0005634,GO:0006355,GO:0009611,GO:0009737,GO:0009738,GO:0010629,GO:0046983	DNA binding|DNA-binding transcription factor activity|nucleus|regulation of transcription, DNA-templated|response to wounding|response to abscisic acid|abscisic acid-activated signaling pathway|negative regulation of gene expression|protein dimerization activity
CmCAR9	Cse_sc040493.1_g010.1	3.15332	2.45081	0.761111	2.12175	0.596836	0.779302	1.73677	1.03764	2.50454	3.82439	4.7976	3.70884	CAR9	Protein C2-DOMAIN ABA-RELATED 9	GO:0005096,GO:0005543,GO:0005634,GO:0005886,GO:0009738,GO:0009789,GO:0043547,GO:0046872	GTPase activator activity|phospholipid binding|nucleus|plasma membrane|abscisic acid-activated signaling pathway|positive regulation of abscisic acid-activated signaling pathway|positive regulation of GTPase activity|metal ion binding
CmABA4	Cse_sc048108.1_g010.1	56.2781	35.2582	26.3258	39.2874	29.9405	59.6353	42.2376	43.9378	28.0115	68.1457	86.2549	60.804	ABA4	Protein ABA DEFICIENT 4, chloroplastic	GO:0009688,GO:0009941,GO:0016021,GO:0016122,GO:0031969,GO:0032928	abscisic acid biosynthetic process|chloroplast envelope|integral component of membrane|xanthophyll metabolic process|chloroplast membrane|regulation of superoxide anion generation
