# Supplementary material for: Whole-transcriptome analysis of differentially expressed genes between ray and disc florets and identification of flowering regulatory genes in Chrysanthemum morifolium
Source: Front Plant Sci. 2022 Aug 4;13:947331. doi: 10.3389/fpls.2022.947331 (PMC9388166; doi:10.3389/fpls.2022.947331)
Supplement: Supplementary File 5 — Details of the proteins used to construct the phylogenetic tree. [file Data_Sheet_2.XLS]

id	term	category	ListHits	ListTotal	PopHits	PopTotal	pval	padj	Enrichment_score	Gene
GO:0008395	steroid hydroxylase activity	molecular_function	2	6179	2	55481	0	0	8.978960997	Cse_sc000091.1_g010.1; Cse_sc012710.1_g050.1
GO:0046256	2,4,6-trinitrotoluene catabolic process	biological_process	1	6179	1	55481	0	0	8.978960997	Cse_sc000172.1_g080.1
GO:0015205	nucleobase transmembrane transporter activity	molecular_function	1	6179	1	55481	0	0	8.978960997	Cse_sc000292.1_g070.1
GO:0042178	xenobiotic catabolic process	biological_process	1	6179	1	55481	0	0	8.978960997	Cse_sc000380.1_g120.1
GO:0102419	sn-2-glycerol-3-phosphate omega-OH-C22:0-CoA acyl transferase activity	molecular_function	3	6179	3	55481	0	0	8.978960997	Cse_sc000389.1_g020.1; Cse_sc004382.1_g020.1; Cse_sc015702.1_g010.1
GO:0009925	basal plasma membrane	cellular_component	2	6179	2	55481	0	0	8.978960997	Cse_sc000429.1_g040.1; Cse_sc001217.1_g070.1
GO:0051262	protein tetramerization	biological_process	2	6179	2	55481	0	0	8.978960997	Cse_sc000498.1_g020.1; Cse_sc001317.1_g070.1
GO:0046373	L-arabinose metabolic process	biological_process	3	6179	3	55481	0	0	8.978960997	Cse_sc000505.1_g030.1; Cse_sc001440.1_g030.1; Cse_sc039163.1_g010.1
GO:0015698	inorganic anion transport	biological_process	1	6179	1	55481	0	0	8.978960997	Cse_sc000586.1_g080.1
GO:0015711	organic anion transport	biological_process	1	6179	1	55481	0	0	8.978960997	Cse_sc000586.1_g080.1
GO:0042882	L-arabinose transmembrane transport	biological_process	1	6179	1	55481	0	0	8.978960997	Cse_sc000619.1_g020.1
GO:0042900	arabinose transmembrane transporter activity	molecular_function	1	6179	1	55481	0	0	8.978960997	Cse_sc000619.1_g020.1
GO:0016071	mRNA metabolic process	biological_process	1	6179	1	55481	0	0	8.978960997	Cse_sc000902.1_g070.1
GO:0000905	sporocarp development involved in asexual reproduction	biological_process	1	6179	1	55481	0	0	8.978960997	Cse_sc000944.1_g040.1
GO:0001896	autolysis	biological_process	1	6179	1	55481	0	0	8.978960997	Cse_sc000944.1_g040.1
GO:0010913	regulation of sterigmatocystin biosynthetic process	biological_process	1	6179	1	55481	0	0	8.978960997	Cse_sc000944.1_g040.1
GO:0010914	positive regulation of sterigmatocystin biosynthetic process	biological_process	1	6179	1	55481	0	0	8.978960997	Cse_sc000944.1_g040.1
GO:0045461	sterigmatocystin biosynthetic process	biological_process	1	6179	1	55481	0	0	8.978960997	Cse_sc000944.1_g040.1
GO:0075307	positive regulation of conidium formation	biological_process	1	6179	1	55481	0	0	8.978960997	Cse_sc000944.1_g040.1
GO:1900376	regulation of secondary metabolite biosynthetic process	biological_process	1	6179	1	55481	0	0	8.978960997	Cse_sc000944.1_g040.1
GO:0006169	adenosine salvage	biological_process	1	6179	1	55481	0	0	8.978960997	Cse_sc001023.1_g100.1
GO:0000247	C-8 sterol isomerase activity	molecular_function	2	6179	2	55481	0	0	8.978960997	Cse_sc001230.1_g070.1; Cse_sc001230.1_g080.1
GO:0004769	steroid delta-isomerase activity	molecular_function	2	6179	2	55481	0	0	8.978960997	Cse_sc001230.1_g070.1; Cse_sc001230.1_g080.1
GO:0047750	cholestenol delta-isomerase activity	molecular_function	2	6179	2	55481	0	0	8.978960997	Cse_sc001230.1_g070.1; Cse_sc001230.1_g080.1
GO:0032048	cardiolipin metabolic process	biological_process	2	6179	2	55481	0	0	8.978960997	Cse_sc001233.1_g060.1; Cse_sc017985.1_g040.1
GO:0035965	cardiolipin acyl-chain remodeling	biological_process	2	6179	2	55481	0	0	8.978960997	Cse_sc001233.1_g060.1; Cse_sc017985.1_g040.1
GO:0022821	potassium ion antiporter activity	molecular_function	5	6179	5	55481	0	0	8.978960997	Cse_sc001305.1_g010.1; Cse_sc002153.1_g070.1; Cse_sc003113.1_g010.1; Cse_sc011211.1_g010.1; Cse_sc037388.1_g020.1
GO:0052731	phosphocholine phosphatase activity	molecular_function	1	6179	1	55481	0	0	8.978960997	Cse_sc001317.1_g070.1
GO:0052732	phosphoethanolamine phosphatase activity	molecular_function	1	6179	1	55481	0	0	8.978960997	Cse_sc001317.1_g070.1
GO:2001247	positive regulation of phosphatidylcholine biosynthetic process	biological_process	1	6179	1	55481	0	0	8.978960997	Cse_sc001388.1_g070.1
GO:2000008	regulation of protein localization to cell surface	biological_process	5	6179	5	55481	0	0	8.978960997	Cse_sc001468.1_g030.1; Cse_sc001812.1_g070.1; Cse_sc005759.1_g020.1; Cse_sc019077.1_g010.1; Cse_sc056513.1_g020.1
GO:0046208	spermine catabolic process	biological_process	1	6179	1	55481	0	0	8.978960997	Cse_sc001494.1_g030.1
GO:0036033	mediator complex binding	molecular_function	2	6179	2	55481	0	0	8.978960997	Cse_sc001506.1_g110.1; Cse_sc001801.1_g120.1
GO:0080149	sucrose induced translational repression	biological_process	1	6179	1	55481	0	0	8.978960997	Cse_sc001552.1_g070.1
GO:0097708	intracellular vesicle	cellular_component	5	6179	5	55481	0	0	8.978960997	Cse_sc001555.1_g070.1; Cse_sc005040.1_g040.1; Cse_sc006036.1_g010.1; Cse_sc010793.1_g020.1; Cse_sc056998.1_g010.1
GO:0005872	minus-end kinesin complex	cellular_component	2	6179	2	55481	0	0	8.978960997	Cse_sc001566.1_g050.1; Cse_sc010479.1_g020.1
GO:0009971	anastral spindle assembly involved in male meiosis	biological_process	2	6179	2	55481	0	0	8.978960997	Cse_sc001566.1_g050.1; Cse_sc010479.1_g020.1
GO:0007204	positive regulation of cytosolic calcium ion concentration	biological_process	1	6179	1	55481	0	0	8.978960997	Cse_sc001595.1_g110.1
GO:0050848	regulation of calcium-mediated signaling	biological_process	1	6179	1	55481	0	0	8.978960997	Cse_sc001595.1_g110.1
GO:0050850	positive regulation of calcium-mediated signaling	biological_process	1	6179	1	55481	0	0	8.978960997	Cse_sc001595.1_g110.1
GO:0004592	pantoate-beta-alanine ligase activity	molecular_function	1	6179	1	55481	0	0	8.978960997	Cse_sc001621.1_g070.1
GO:0016035	zeta DNA polymerase complex	cellular_component	1	6179	1	55481	0	0	8.978960997	Cse_sc001696.1_g010.1
GO:0052638	indole-3-butyrate beta-glucosyltransferase activity	molecular_function	2	6179	2	55481	0	0	8.978960997	Cse_sc001845.1_g010.1; Cse_sc001845.1_g020.1
GO:0033353	S-adenosylmethionine cycle	biological_process	1	6179	1	55481	0	0	8.978960997	Cse_sc001880.1_g070.1
GO:0090342	regulation of cell aging	biological_process	1	6179	1	55481	0	0	8.978960997	Cse_sc001880.1_g070.1
GO:0050468	reticuline oxidase activity	molecular_function	1	6179	1	55481	0	0	8.978960997	Cse_sc001949.1_g030.1
GO:0016469	proton-transporting two-sector ATPase complex	cellular_component	1	6179	1	55481	0	0	8.978960997	Cse_sc001972.1_g020.1
GO:0009517	PSII associated light-harvesting complex II	cellular_component	1	6179	1	55481	0	0	8.978960997	Cse_sc002276.1_g040.1
GO:0009783	photosystem II antenna complex	cellular_component	1	6179	1	55481	0	0	8.978960997	Cse_sc002276.1_g040.1
GO:0051179	localization	biological_process	3	6179	3	55481	0	0	8.978960997	Cse_sc002347.1_g010.1; Cse_sc004180.1_g020.1; Cse_sc007530.1_g050.1
GO:0070574	cadmium ion transmembrane transport	biological_process	1	6179	1	55481	0	0	8.978960997	Cse_sc002714.1_g010.1
GO:0015398	high-affinity secondary active ammonium transmembrane transporter activity	molecular_function	1	6179	1	55481	0	0	8.978960997	Cse_sc002835.1_g060.1
GO:0015098	molybdate ion transmembrane transporter activity	molecular_function	2	6179	2	55481	0	0	8.978960997	Cse_sc003189.1_g090.1; Cse_sc008810.1_g010.1
GO:0015689	molybdate ion transport	biological_process	2	6179	2	55481	0	0	8.978960997	Cse_sc003189.1_g090.1; Cse_sc008810.1_g010.1
GO:0090414	molybdate ion export from vacuole	biological_process	1	6179	1	55481	0	0	8.978960997	Cse_sc003189.1_g090.1
GO:0032878	regulation of establishment or maintenance of cell polarity	biological_process	1	6179	1	55481	0	0	8.978960997	Cse_sc003646.1_g040.1
GO:0048032	galacturonate binding	molecular_function	1	6179	1	55481	0	0	8.978960997	Cse_sc003652.1_g050.1
GO:0032453	histone demethylase activity (H3-K4 specific)	molecular_function	1	6179	1	55481	0	0	8.978960997	Cse_sc003827.1_g020.1
GO:0009702	L-arabinokinase activity	molecular_function	1	6179	1	55481	0	0	8.978960997	Cse_sc003843.1_g040.1
GO:0046906	tetrapyrrole binding	molecular_function	1	6179	1	55481	0	0	8.978960997	Cse_sc004072.1_g020.1
GO:0090470	shoot organ boundary specification	biological_process	1	6179	1	55481	0	0	8.978960997	Cse_sc004468.1_g030.1
GO:0071344	diphosphate metabolic process	biological_process	1	6179	1	55481	0	0	8.978960997	Cse_sc004633.1_g040.1
GO:0004567	beta-mannosidase activity	molecular_function	2	6179	2	55481	0	0	8.978960997	Cse_sc004678.1_g060.1; Cse_sc013546.1_g020.1
GO:0047668	amygdalin beta-glucosidase activity	molecular_function	2	6179	2	55481	0	0	8.978960997	Cse_sc004678.1_g060.1; Cse_sc013546.1_g020.1
GO:0080079	cellobiose glucosidase activity	molecular_function	2	6179	2	55481	0	0	8.978960997	Cse_sc004678.1_g060.1; Cse_sc013546.1_g020.1
GO:0080081	4-methylumbelliferyl-beta-D-glucopyranoside beta-glucosidase activity	molecular_function	2	6179	2	55481	0	0	8.978960997	Cse_sc004678.1_g060.1; Cse_sc013546.1_g020.1
GO:0080082	esculin beta-glucosidase activity	molecular_function	2	6179	2	55481	0	0	8.978960997	Cse_sc004678.1_g060.1; Cse_sc013546.1_g020.1
GO:0080083	beta-gentiobiose beta-glucosidase activity	molecular_function	2	6179	2	55481	0	0	8.978960997	Cse_sc004678.1_g060.1; Cse_sc013546.1_g020.1
GO:0007164	establishment of tissue polarity	biological_process	1	6179	1	55481	0	0	8.978960997	Cse_sc004926.1_g060.1
GO:0006778	porphyrin-containing compound metabolic process	biological_process	2	6179	2	55481	0	0	8.978960997	Cse_sc005060.1_g050.1; Cse_sc022631.1_g040.1
GO:1900554	asperfuranone biosynthetic process	biological_process	1	6179	1	55481	0	0	8.978960997	Cse_sc005063.1_g030.1
GO:0031507	heterochromatin assembly	biological_process	2	6179	2	55481	0	0	8.978960997	Cse_sc005158.1_g020.1; Cse_sc048418.1_g010.1
GO:0010166	wax metabolic process	biological_process	2	6179	2	55481	0	0	8.978960997	Cse_sc005237.1_g070.1; Cse_sc039926.1_g020.1
GO:0005547	phosphatidylinositol-3,4,5-trisphosphate binding	molecular_function	2	6179	2	55481	0	0	8.978960997	Cse_sc005287.1_g030.1; Cse_sc030456.1_g030.1
GO:0010350	cellular response to magnesium starvation	biological_process	2	6179	2	55481	0	0	8.978960997	Cse_sc005287.1_g030.1; Cse_sc030456.1_g030.1
GO:0031115	negative regulation of microtubule polymerization	biological_process	2	6179	2	55481	0	0	8.978960997	Cse_sc005287.1_g030.1; Cse_sc030456.1_g030.1
GO:0031117	positive regulation of microtubule depolymerization	biological_process	2	6179	2	55481	0	0	8.978960997	Cse_sc005287.1_g030.1; Cse_sc030456.1_g030.1
GO:0043325	phosphatidylinositol-3,4-bisphosphate binding	molecular_function	2	6179	2	55481	0	0	8.978960997	Cse_sc005287.1_g030.1; Cse_sc030456.1_g030.1
GO:0071280	cellular response to copper ion	biological_process	2	6179	2	55481	0	0	8.978960997	Cse_sc005287.1_g030.1; Cse_sc030456.1_g030.1
GO:0071286	cellular response to magnesium ion	biological_process	2	6179	2	55481	0	0	8.978960997	Cse_sc005287.1_g030.1; Cse_sc030456.1_g030.1
GO:0071325	cellular response to mannitol stimulus	biological_process	2	6179	2	55481	0	0	8.978960997	Cse_sc005287.1_g030.1; Cse_sc030456.1_g030.1
GO:0072709	cellular response to sorbitol	biological_process	2	6179	2	55481	0	0	8.978960997	Cse_sc005287.1_g030.1; Cse_sc030456.1_g030.1
GO:0075733	intracellular transport of virus	biological_process	2	6179	2	55481	0	0	8.978960997	Cse_sc005287.1_g030.1; Cse_sc030456.1_g030.1
GO:0000904	cell morphogenesis involved in differentiation	biological_process	1	6179	1	55481	0	0	8.978960997	Cse_sc005377.1_g040.1
GO:0048240	sperm capacitation	biological_process	2	6179	2	55481	0	0	8.978960997	Cse_sc005759.1_g020.1; Cse_sc056513.1_g020.1
GO:2000488	positive regulation of brassinosteroid biosynthetic process	biological_process	2	6179	2	55481	0	0	8.978960997	Cse_sc005858.1_g090.1; Cse_sc039329.1_g010.1
GO:0004328	formamidase activity	molecular_function	1	6179	1	55481	0	0	8.978960997	Cse_sc006024.1_g020.1
GO:0033728	divinyl chlorophyllide a 8-vinyl-reductase activity	molecular_function	1	6179	1	55481	0	0	8.978960997	Cse_sc006199.1_g020.1
GO:0051744	3,8-divinyl protochlorophyllide a 8-vinyl reductase activity	molecular_function	1	6179	1	55481	0	0	8.978960997	Cse_sc006199.1_g020.1
GO:0080108	S-alkylthiohydroximate lyase activity	molecular_function	1	6179	1	55481	0	0	8.978960997	Cse_sc006323.1_g010.1
GO:0061673	mitotic spindle astral microtubule	cellular_component	1	6179	1	55481	0	0	8.978960997	Cse_sc006497.1_g040.1
GO:1990023	mitotic spindle midzone	cellular_component	1	6179	1	55481	0	0	8.978960997	Cse_sc006497.1_g040.1
GO:0090706	specification of plant organ position	biological_process	4	6179	4	55481	0	0	8.978960997	Cse_sc006528.1_g010.1; Cse_sc011972.1_g050.1; Cse_sc023298.1_g020.1; Cse_sc029081.1_g010.1
GO:0097501	stress response to metal ion	biological_process	1	6179	1	55481	0	0	8.978960997	Cse_sc006644.1_g030.1
GO:0071918	urea transmembrane transport	biological_process	1	6179	1	55481	0	0	8.978960997	Cse_sc006766.1_g110.1
GO:0030912	response to deep water	biological_process	2	6179	2	55481	0	0	8.978960997	Cse_sc007069.1_g040.1; Cse_sc025424.1_g020.1
GO:0003914	DNA (6-4) photolyase activity	molecular_function	1	6179	1	55481	0	0	8.978960997	Cse_sc007116.1_g040.1
GO:0070330	aromatase activity	molecular_function	1	6179	1	55481	0	0	8.978960997	Cse_sc007167.1_g020.1
GO:0061634	alpha-D-xyloside xylohydrolase	molecular_function	3	6179	3	55481	0	0	8.978960997	Cse_sc007556.1_g050.1; Cse_sc011078.1_g040.1; Cse_sc035777.1_g020.1
GO:0080176	xyloglucan 1,6-alpha-xylosidase activity	molecular_function	2	6179	2	55481	0	0	8.978960997	Cse_sc007556.1_g050.1; Cse_sc035777.1_g020.1
GO:0062045	L-lysine alpha-aminotransferase	molecular_function	1	6179	1	55481	0	0	8.978960997	Cse_sc007850.1_g020.1
GO:0006895	Golgi to endosome transport	biological_process	1	6179	1	55481	0	0	8.978960997	Cse_sc007936.1_g020.1
GO:0101005	ubiquitinyl hydrolase activity	molecular_function	1	6179	1	55481	0	0	8.978960997	Cse_sc008038.1_g020.1
GO:0033810	anthocyanin 5-O-glucoside 6'''-O-malonyltransferase activity	molecular_function	1	6179	1	55481	0	0	8.978960997	Cse_sc008096.1_g030.1
GO:0090471	9,15,9'-tri-cis-zeta-carotene isomerase activity	molecular_function	1	6179	1	55481	0	0	8.978960997	Cse_sc008178.1_g070.1
GO:0009769	photosynthesis, light harvesting in photosystem II	biological_process	1	6179	1	55481	0	0	8.978960997	Cse_sc008237.1_g050.1
GO:0042820	vitamin B6 catabolic process	biological_process	1	6179	1	55481	0	0	8.978960997	Cse_sc008379.1_g070.1
GO:0042821	pyridoxal biosynthetic process	biological_process	1	6179	1	55481	0	0	8.978960997	Cse_sc008379.1_g070.1
GO:0050236	pyridoxine:NADP 4-dehydrogenase activity	molecular_function	1	6179	1	55481	0	0	8.978960997	Cse_sc008379.1_g070.1
GO:0008792	arginine decarboxylase activity	molecular_function	1	6179	1	55481	0	0	8.978960997	Cse_sc009252.1_g030.1
GO:0009446	putrescine biosynthetic process	biological_process	1	6179	1	55481	0	0	8.978960997	Cse_sc009252.1_g030.1
GO:0004557	alpha-galactosidase activity	molecular_function	2	6179	2	55481	0	0	8.978960997	Cse_sc009352.1_g050.1; Cse_sc016815.1_g030.1
GO:0008506	sucrose:proton symporter activity	molecular_function	1	6179	1	55481	0	0	8.978960997	Cse_sc009532.1_g020.1
GO:0004126	cytidine deaminase activity	molecular_function	2	6179	2	55481	0	0	8.978960997	Cse_sc009585.1_g030.1; Cse_sc014477.1_g030.1
GO:0006216	cytidine catabolic process	biological_process	2	6179	2	55481	0	0	8.978960997	Cse_sc009585.1_g030.1; Cse_sc014477.1_g030.1
GO:0009972	cytidine deamination	biological_process	2	6179	2	55481	0	0	8.978960997	Cse_sc009585.1_g030.1; Cse_sc014477.1_g030.1
GO:0047844	deoxycytidine deaminase activity	molecular_function	2	6179	2	55481	0	0	8.978960997	Cse_sc009585.1_g030.1; Cse_sc014477.1_g030.1
GO:0043394	proteoglycan binding	molecular_function	1	6179	1	55481	0	0	8.978960997	Cse_sc009634.1_g020.1
GO:0018580	nitronate monooxygenase activity	molecular_function	1	6179	1	55481	0	0	8.978960997	Cse_sc009734.1_g010.1
GO:0018171	peptidyl-cysteine oxidation	biological_process	2	6179	2	55481	0	0	8.978960997	Cse_sc010252.1_g020.1; Cse_sc017200.1_g020.1
GO:0070483	detection of hypoxia	biological_process	2	6179	2	55481	0	0	8.978960997	Cse_sc010252.1_g020.1; Cse_sc017200.1_g020.1
GO:0015194	L-serine transmembrane transporter activity	molecular_function	1	6179	1	55481	0	0	8.978960997	Cse_sc010432.1_g010.1
GO:0015808	L-alanine transport	biological_process	1	6179	1	55481	0	0	8.978960997	Cse_sc010432.1_g010.1
GO:0009885	transmembrane histidine kinase cytokinin receptor activity	molecular_function	1	6179	1	55481	0	0	8.978960997	Cse_sc010602.1_g020.1
GO:0031534	minus-end directed microtubule sliding	biological_process	1	6179	1	55481	0	0	8.978960997	Cse_sc010615.1_g020.1
GO:0051647	nucleus localization	biological_process	1	6179	1	55481	0	0	8.978960997	Cse_sc010615.1_g020.1
GO:0007534	gene conversion at mating-type locus	biological_process	1	6179	1	55481	0	0	8.978960997	Cse_sc010814.1_g010.1
GO:0045950	negative regulation of mitotic recombination	biological_process	1	6179	1	55481	0	0	8.978960997	Cse_sc010814.1_g010.1
GO:0048478	replication fork protection	biological_process	1	6179	1	55481	0	0	8.978960997	Cse_sc010814.1_g010.1
GO:0050275	scopoletin glucosyltransferase activity	molecular_function	1	6179	1	55481	0	0	8.978960997	Cse_sc010951.1_g020.1
GO:0010184	cytokinin transport	biological_process	1	6179	1	55481	0	0	8.978960997	Cse_sc011290.1_g020.1
GO:0015211	purine nucleoside transmembrane transporter activity	molecular_function	1	6179	1	55481	0	0	8.978960997	Cse_sc011290.1_g020.1
GO:0006213	pyrimidine nucleoside metabolic process	biological_process	1	6179	1	55481	0	0	8.978960997	Cse_sc011390.1_g020.1
GO:0050225	pseudouridine kinase activity	molecular_function	1	6179	1	55481	0	0	8.978960997	Cse_sc011390.1_g020.1
GO:0009715	chalcone biosynthetic process	biological_process	1	6179	1	55481	0	0	8.978960997	Cse_sc011905.1_g020.1
GO:0034081	polyketide synthase complex	cellular_component	1	6179	1	55481	0	0	8.978960997	Cse_sc011905.1_g020.1
GO:1901696	cannabinoid biosynthetic process	biological_process	1	6179	1	55481	0	0	8.978960997	Cse_sc011905.1_g020.1
GO:0033466	trans-zeatin biosynthetic process	biological_process	2	6179	2	55481	0	0	8.978960997	Cse_sc012047.1_g010.1; Cse_sc025196.1_g010.1
GO:0008083	growth factor activity	molecular_function	1	6179	1	55481	0	0	8.978960997	Cse_sc012937.1_g010.1
GO:0004474	malate synthase activity	molecular_function	1	6179	1	55481	0	0	8.978960997	Cse_sc013532.1_g020.1
GO:0004451	isocitrate lyase activity	molecular_function	1	6179	1	55481	0	0	8.978960997	Cse_sc013622.1_g010.1
GO:0032441	pheophorbide a oxygenase activity	molecular_function	1	6179	1	55481	0	0	8.978960997	Cse_sc013674.1_g010.1
GO:1900602	endocrocin biosynthetic process	biological_process	1	6179	1	55481	0	0	8.978960997	Cse_sc013884.1_g050.1
GO:0034097	response to cytokine	biological_process	1	6179	1	55481	0	0	8.978960997	Cse_sc014271.1_g020.1
GO:0090661	box H/ACA telomerase RNP complex	cellular_component	1	6179	1	55481	0	0	8.978960997	Cse_sc015159.1_g030.1
GO:0102395	9-cis-beta-carotene 9',10'-cleavage oxygenase activity	molecular_function	1	6179	1	55481	0	0	8.978960997	Cse_sc015189.1_g010.1
GO:0033834	kaempferol 3-O-galactosyltransferase activity	molecular_function	1	6179	1	55481	0	0	8.978960997	Cse_sc016368.1_g010.1
GO:0102479	quercetin 3-O-beta:-D-galactosyltransferase activity	molecular_function	1	6179	1	55481	0	0	8.978960997	Cse_sc016368.1_g010.1
GO:0006722	triterpenoid metabolic process	biological_process	1	6179	1	55481	0	0	8.978960997	Cse_sc016526.1_g010.1
GO:0102917	(S)-reticuline 7-O-methyltransferase activity	molecular_function	2	6179	2	55481	0	0	8.978960997	Cse_sc016752.1_g030.1; Cse_sc025961.1_g030.1
GO:0102918	(R)-reticuline 7-O-methyltransferase activity	molecular_function	2	6179	2	55481	0	0	8.978960997	Cse_sc016752.1_g030.1; Cse_sc025961.1_g030.1
GO:0030705	cytoskeleton-dependent intracellular transport	biological_process	1	6179	1	55481	0	0	8.978960997	Cse_sc017118.1_g030.1
GO:0047496	vesicle transport along microtubule	biological_process	1	6179	1	55481	0	0	8.978960997	Cse_sc017778.1_g040.1
GO:0019150	D-ribulokinase activity	molecular_function	1	6179	1	55481	0	0	8.978960997	Cse_sc018139.1_g060.1
GO:0048529	magnesium-protoporphyrin IX monomethyl ester (oxidative) cyclase activity	molecular_function	1	6179	1	55481	0	0	8.978960997	Cse_sc018423.1_g020.1
GO:0004081	bis(5'-nucleosyl)-tetraphosphatase (asymmetrical) activity	molecular_function	1	6179	1	55481	0	0	8.978960997	Cse_sc018568.1_g020.1
GO:0015967	diadenosine tetraphosphate catabolic process	biological_process	1	6179	1	55481	0	0	8.978960997	Cse_sc018568.1_g020.1
GO:0004157	dihydropyrimidinase activity	molecular_function	1	6179	1	55481	0	0	8.978960997	Cse_sc019442.1_g040.1
GO:0050898	nitrile metabolic process	biological_process	1	6179	1	55481	0	0	8.978960997	Cse_sc019896.1_g020.1
GO:0006587	serotonin biosynthetic process from tryptophan	biological_process	1	6179	1	55481	0	0	8.978960997	Cse_sc020112.1_g040.1
GO:0008935	1,4-dihydroxy-2-naphthoyl-CoA synthase activity	molecular_function	1	6179	1	55481	0	0	8.978960997	Cse_sc020250.1_g030.1
GO:0006148	inosine catabolic process	biological_process	2	6179	2	55481	0	0	8.978960997	Cse_sc020412.1_g040.1; Cse_sc036356.1_g010.1
GO:0071462	cellular response to water stimulus	biological_process	1	6179	1	55481	0	0	8.978960997	Cse_sc020450.1_g020.1
GO:0003837	beta-ureidopropionase activity	molecular_function	1	6179	1	55481	0	0	8.978960997	Cse_sc020451.1_g020.1
GO:0019482	beta-alanine metabolic process	biological_process	1	6179	1	55481	0	0	8.978960997	Cse_sc020451.1_g020.1
GO:0033396	beta-alanine biosynthetic process via 3-ureidopropionate	biological_process	1	6179	1	55481	0	0	8.978960997	Cse_sc020451.1_g020.1
GO:0009516	leucoplast	cellular_component	1	6179	1	55481	0	0	8.978960997	Cse_sc021287.1_g030.1
GO:0000024	maltose biosynthetic process	biological_process	1	6179	1	55481	0	0	8.978960997	Cse_sc021945.1_g010.1
GO:0004132	dCMP deaminase activity	molecular_function	1	6179	1	55481	0	0	8.978960997	Cse_sc023524.1_g040.1
GO:0045848	positive regulation of nitrogen utilization	biological_process	1	6179	1	55481	0	0	8.978960997	Cse_sc024226.1_g010.1
GO:0072429	response to intra-S DNA damage checkpoint signaling	biological_process	1	6179	1	55481	0	0	8.978960997	Cse_sc024260.1_g020.1
GO:1990601	5' overhang single-stranded DNA endodeoxyribonuclease activity	molecular_function	1	6179	1	55481	0	0	8.978960997	Cse_sc024260.1_g020.1
GO:0009045	xylose isomerase activity	molecular_function	1	6179	1	55481	0	0	8.978960997	Cse_sc024691.1_g010.1
GO:0043482	cellular pigment accumulation	biological_process	1	6179	1	55481	0	0	8.978960997	Cse_sc025259.1_g020.1
GO:0090549	response to carbon starvation	biological_process	1	6179	1	55481	0	0	8.978960997	Cse_sc025259.1_g020.1
GO:2000786	positive regulation of autophagosome assembly	biological_process	1	6179	1	55481	0	0	8.978960997	Cse_sc025259.1_g020.1
GO:0033611	oxalate catabolic process	biological_process	1	6179	1	55481	0	0	8.978960997	Cse_sc025691.1_g010.1
GO:0050203	oxalate-CoA ligase activity	molecular_function	1	6179	1	55481	0	0	8.978960997	Cse_sc025691.1_g010.1
GO:0033274	response to vitamin B2	biological_process	1	6179	1	55481	0	0	8.978960997	Cse_sc025817.1_g020.1
GO:0060867	fruit abscission	biological_process	1	6179	1	55481	0	0	8.978960997	Cse_sc027006.1_g010.1
GO:2000692	negative regulation of seed maturation	biological_process	1	6179	1	55481	0	0	8.978960997	Cse_sc027006.1_g010.1
GO:0043903	regulation of symbiosis, encompassing mutualism through parasitism	biological_process	1	6179	1	55481	0	0	8.978960997	Cse_sc028545.1_g010.1
GO:0033188	sphingomyelin synthase activity	molecular_function	1	6179	1	55481	0	0	8.978960997	Cse_sc028654.1_g020.1
GO:0045140	inositol phosphoceramide synthase activity	molecular_function	1	6179	1	55481	0	0	8.978960997	Cse_sc028654.1_g020.1
GO:0047493	ceramide cholinephosphotransferase activity	molecular_function	1	6179	1	55481	0	0	8.978960997	Cse_sc028654.1_g020.1
GO:1901918	negative regulation of exoribonuclease activity	biological_process	1	6179	1	55481	0	0	8.978960997	Cse_sc028762.1_g010.1
GO:0008909	isochorismate synthase activity	molecular_function	2	6179	2	55481	0	0	8.978960997	Cse_sc030981.1_g010.1; Cse_sc043257.1_g010.1
GO:0004512	inositol-3-phosphate synthase activity	molecular_function	1	6179	1	55481	0	0	8.978960997	Cse_sc031249.1_g020.1
GO:0042972	licheninase activity	molecular_function	1	6179	1	55481	0	0	8.978960997	Cse_sc031595.1_g040.1
GO:0043496	regulation of protein homodimerization activity	biological_process	1	6179	1	55481	0	0	8.978960997	Cse_sc032055.1_g020.1
GO:0007154	cell communication	biological_process	1	6179	1	55481	0	0	8.978960997	Cse_sc032458.1_g010.1
GO:0047364	desulfoglucosinolate sulfotransferase activity	molecular_function	1	6179	1	55481	0	0	8.978960997	Cse_sc032571.1_g020.1
GO:0033539	fatty acid beta-oxidation using acyl-CoA dehydrogenase	biological_process	1	6179	1	55481	0	0	8.978960997	Cse_sc035664.1_g020.1
GO:0052727	capsanthin synthase activity	molecular_function	1	6179	1	55481	0	0	8.978960997	Cse_sc036080.1_g030.1
GO:0052728	capsorubin synthase activity	molecular_function	1	6179	1	55481	0	0	8.978960997	Cse_sc036080.1_g030.1
GO:2000083	negative regulation of L-ascorbic acid biosynthetic process	biological_process	1	6179	1	55481	0	0	8.978960997	Cse_sc036718.1_g010.1
GO:0004551	nucleotide diphosphatase activity	molecular_function	1	6179	1	55481	0	0	8.978960997	Cse_sc045909.1_g010.1
GO:0009141	nucleoside triphosphate metabolic process	biological_process	1	6179	1	55481	0	0	8.978960997	Cse_sc045909.1_g010.1
GO:0017111	nucleoside-triphosphatase activity	molecular_function	1	6179	1	55481	0	0	8.978960997	Cse_sc045909.1_g010.1
GO:0070828	heterochromatin organization	biological_process	1	6179	1	55481	0	0	8.978960997	Cse_sc048418.1_g010.1
GO:2000653	regulation of genetic imprinting	biological_process	1	6179	1	55481	0	0	8.978960997	Cse_sc048418.1_g010.1
GO:0016021	integral component of membrane	cellular_component	1541	6179	8060	55481	9.11E-118	1.80E-116	1.716697134	Cse_sc000001.1_g050.1; Cse_sc000001.1_g160.1; Cse_sc000001.1_g220.1; Cse_sc000002.1_g140.1; Cse_sc000006.1_g190.1; Cse_sc000006.1_g210.1; Cse_sc000008.1_g090.1; Cse_sc000009.1_g010.1; Cse_sc000012.1_g170.1; Cse_sc000017.1_g160.1; Cse_sc000019.1_g040.1; Cse_sc000031.1_g090.1; Cse_sc000037.1_g030.1; Cse_sc000037.1_g080.1; Cse_sc000050.1_g150.1; Cse_sc000056.1_g050.1; Cse_sc000059.1_g030.1; Cse_sc00…
g020.1; Cse_sc043845.1_g010.1; Cse_sc044004.1_g010.1; Cse_sc044160.1_g010.1; Cse_sc045438.1_g010.1; Cse_sc045487.1_g010.1; Cse_sc045494.1_g020.1; Cse_sc045816.1_g010.1; Cse_sc045860.1_g010.1; Cse_sc045878.1_g010.1; Cse_sc045909.1_g010.1; Cse_sc046238.1_g020.1; Cse_sc046242.1_g010.1; Cse_sc046285.1_g010.1; Cse_sc046500.1_g010.1; Cse_sc046531.1_g010.1; Cse_sc046777.1_g020.1; Cse_sc047023.1_g010.1; …
GO:0005576	extracellular region	cellular_component	406	6179	1370	55481	3.14E-80	6.17E-79	2.660918368	Cse_sc000001.1_g110.1; Cse_sc000001.1_g170.1; Cse_sc000025.1_g080.1; Cse_sc000082.1_g170.1; Cse_sc000091.1_g060.1; Cse_sc000117.1_g030.1; Cse_sc000150.1_g070.1; Cse_sc000186.1_g070.1; Cse_sc000197.1_g070.1; Cse_sc000199.1_g050.1; Cse_sc000206.1_g160.1; Cse_sc000208.1_g100.1; Cse_sc000220.1_g030.1; Cse_sc000226.1_g070.1; Cse_sc000243.1_g080.1; Cse_sc000245.1_g030.1; Cse_sc000269.1_g040.1; Cse_sc00…
GO:0005886	plasma membrane	cellular_component	1034	6179	5490	55481	3.52E-71	6.89E-70	1.69111943	Cse_sc000002.1_g140.1; Cse_sc000006.1_g190.1; Cse_sc000008.1_g090.1; Cse_sc000017.1_g160.1; Cse_sc000037.1_g080.1; Cse_sc000039.1_g050.1; Cse_sc000043.1_g030.1; Cse_sc000044.1_g170.1; Cse_sc000050.1_g150.1; Cse_sc000059.1_g030.1; Cse_sc000064.1_g070.1; Cse_sc000064.1_g080.1; Cse_sc000076.1_g020.1; Cse_sc000082.1_g020.1; Cse_sc000110.1_g070.1; Cse_sc000131.1_g130.1; Cse_sc000146.1_g080.1; Cse_sc00…
GO:0003700	DNA-binding transcription factor activity	molecular_function	483	6179	2342	55481	1.24E-42	2.41E-41	1.851766935	Cse_sc000001.1_g250.1; Cse_sc000017.1_g020.1; Cse_sc000027.1_g070.1; Cse_sc000028.1_g020.1; Cse_sc000044.1_g080.1; Cse_sc000067.1_g060.1; Cse_sc000076.1_g020.1; Cse_sc000082.1_g120.1; Cse_sc000095.1_g140.1; Cse_sc000098.1_g130.1; Cse_sc000118.1_g010.1; Cse_sc000151.1_g040.1; Cse_sc000187.1_g020.1; Cse_sc000223.1_g120.1; Cse_sc000234.1_g020.1; Cse_sc000245.1_g020.1; Cse_sc000266.1_g030.1; Cse_sc00…
GO:0020037	heme binding	molecular_function	260	6179	1041	55481	4.02E-37	7.78E-36	2.242583919	Cse_sc000008.1_g180.1; Cse_sc000091.1_g010.1; Cse_sc000199.1_g050.1; Cse_sc000204.1_g060.1; Cse_sc000206.1_g160.1; Cse_sc000240.1_g140.1; Cse_sc000315.1_g010.1; Cse_sc000343.1_g040.1; Cse_sc000418.1_g060.1; Cse_sc000439.1_g050.1; Cse_sc000524.1_g040.1; Cse_sc000652.1_g060.1; Cse_sc000654.1_g050.1; Cse_sc000668.1_g030.1; Cse_sc000681.1_g060.1; Cse_sc001046.1_g030.1; Cse_sc001046.1_g040.1; Cse_sc00…
GO:0071555	cell wall organization	biological_process	161	6179	576	55481	2.10E-29	4.04E-28	2.509744306	Cse_sc000080.1_g080.1; Cse_sc000088.1_g130.1; Cse_sc000151.1_g040.1; Cse_sc000170.1_g100.1; Cse_sc000197.1_g070.1; Cse_sc000220.1_g030.1; Cse_sc000412.1_g050.1; Cse_sc000566.1_g070.1; Cse_sc000605.1_g090.1; Cse_sc000623.1_g100.1; Cse_sc000651.1_g030.1; Cse_sc000651.1_g090.1; Cse_sc000651.1_g110.1; Cse_sc000653.1_g060.1; Cse_sc000726.1_g040.1; Cse_sc000758.1_g020.1; Cse_sc000805.1_g070.1; Cse_sc00…
GO:0005618	cell wall	cellular_component	233	6179	1024	55481	3.85E-27	7.39E-26	2.043064367	Cse_sc000012.1_g060.1; Cse_sc000082.1_g170.1; Cse_sc000150.1_g070.1; Cse_sc000171.1_g090.1; Cse_sc000179.1_g050.1; Cse_sc000221.1_g090.1; Cse_sc000283.1_g050.1; Cse_sc000289.1_g060.1; Cse_sc000311.1_g030.1; Cse_sc000342.1_g030.1; Cse_sc000498.1_g040.1; Cse_sc000498.1_g060.1; Cse_sc000566.1_g070.1; Cse_sc000605.1_g090.1; Cse_sc000650.1_g060.1; Cse_sc000651.1_g030.1; Cse_sc000651.1_g090.1; Cse_sc00…
GO:0005506	iron ion binding	molecular_function	211	6179	902	55481	2.29E-26	4.36E-25	2.100399967	Cse_sc000005.1_g160.1; Cse_sc000091.1_g010.1; Cse_sc000240.1_g140.1; Cse_sc000315.1_g010.1; Cse_sc000343.1_g040.1; Cse_sc000439.1_g050.1; Cse_sc000652.1_g060.1; Cse_sc000654.1_g050.1; Cse_sc000668.1_g030.1; Cse_sc001046.1_g030.1; Cse_sc001046.1_g040.1; Cse_sc001198.1_g020.1; Cse_sc001235.1_g010.1; Cse_sc001298.1_g140.1; Cse_sc001326.1_g060.1; Cse_sc001363.1_g020.1; Cse_sc001560.1_g040.1; Cse_sc00…
GO:0043565	sequence-specific DNA binding	molecular_function	276	6179	1374	55481	5.23E-23	9.93E-22	1.803634087	Cse_sc000001.1_g250.1; Cse_sc000044.1_g080.1; Cse_sc000067.1_g060.1; Cse_sc000076.1_g020.1; Cse_sc000082.1_g120.1; Cse_sc000095.1_g140.1; Cse_sc000102.1_g110.1; Cse_sc000187.1_g020.1; Cse_sc000324.1_g040.1; Cse_sc000364.1_g050.1; Cse_sc000365.1_g010.1; Cse_sc000392.1_g020.1; Cse_sc000626.1_g010.1; Cse_sc000641.1_g030.1; Cse_sc000642.1_g060.1; Cse_sc000732.1_g040.1; Cse_sc000838.1_g010.1; Cse_sc00…
GO:0016020	membrane	cellular_component	369	6179	2010	55481	7.55E-23	1.43E-21	1.648376422	Cse_sc000006.1_g210.1; Cse_sc000008.1_g180.1; Cse_sc000037.1_g080.1; Cse_sc000138.1_g100.1; Cse_sc000149.1_g050.1; Cse_sc000149.1_g070.1; Cse_sc000198.1_g050.1; Cse_sc000229.1_g030.1; Cse_sc000240.1_g140.1; Cse_sc000257.1_g060.1; Cse_sc000296.1_g050.1; Cse_sc000298.1_g080.1; Cse_sc000302.1_g030.1; Cse_sc000343.1_g040.1; Cse_sc000352.1_g030.1; Cse_sc000389.1_g020.1; Cse_sc000395.1_g030.1; Cse_sc00…
GO:0048046	apoplast	cellular_component	187	6179	819	55481	2.71E-22	5.09E-21	2.050141278	Cse_sc000012.1_g060.1; Cse_sc000138.1_g100.1; Cse_sc000171.1_g090.1; Cse_sc000179.1_g050.1; Cse_sc000289.1_g040.1; Cse_sc000289.1_g060.1; Cse_sc000296.1_g050.1; Cse_sc000498.1_g040.1; Cse_sc000498.1_g060.1; Cse_sc000505.1_g030.1; Cse_sc000566.1_g070.1; Cse_sc000651.1_g030.1; Cse_sc000651.1_g090.1; Cse_sc000651.1_g110.1; Cse_sc000726.1_g040.1; Cse_sc000902.1_g060.1; Cse_sc001152.1_g070.1; Cse_sc00…
GO:0005783	endoplasmic reticulum	cellular_component	279	6179	1438	55481	5.54E-21	1.04E-19	1.742093267	Cse_sc000001.1_g170.1; Cse_sc000008.1_g090.1; Cse_sc000008.1_g180.1; Cse_sc000012.1_g170.1; Cse_sc000017.1_g160.1; Cse_sc000050.1_g150.1; Cse_sc000071.1_g040.1; Cse_sc000146.1_g080.1; Cse_sc000188.1_g090.1; Cse_sc000198.1_g050.1; Cse_sc000241.1_g180.1; Cse_sc000331.1_g010.1; Cse_sc000343.1_g040.1; Cse_sc000564.1_g020.1; Cse_sc000668.1_g030.1; Cse_sc000677.1_g030.1; Cse_sc000726.1_g010.1; Cse_sc00…
GO:0009505	plant-type cell wall	cellular_component	109	6179	387	55481	7.97E-21	1.48E-19	2.528958007	Cse_sc000001.1_g170.1; Cse_sc000082.1_g170.1; Cse_sc000171.1_g090.1; Cse_sc000206.1_g160.1; Cse_sc000220.1_g030.1; Cse_sc000409.1_g080.1; Cse_sc000505.1_g030.1; Cse_sc000539.1_g150.1; Cse_sc000959.1_g020.1; Cse_sc001152.1_g070.1; Cse_sc001338.1_g060.1; Cse_sc001348.1_g030.1; Cse_sc001388.1_g080.1; Cse_sc001390.1_g040.1; Cse_sc001440.1_g030.1; Cse_sc001609.1_g020.1; Cse_sc001910.1_g010.1; Cse_sc00…
GO:0005773	vacuole	cellular_component	224	6179	1079	55481	9.17E-21	1.70E-19	1.864028974	Cse_sc000012.1_g060.1; Cse_sc000037.1_g080.1; Cse_sc000050.1_g150.1; Cse_sc000138.1_g100.1; Cse_sc000166.1_g010.1; Cse_sc000188.1_g090.1; Cse_sc000215.1_g010.1; Cse_sc000296.1_g050.1; Cse_sc000406.1_g030.1; Cse_sc000409.1_g080.1; Cse_sc000505.1_g030.1; Cse_sc000602.1_g070.1; Cse_sc000677.1_g030.1; Cse_sc000844.1_g080.1; Cse_sc000927.1_g010.1; Cse_sc000928.1_g050.1; Cse_sc000983.1_g030.1; Cse_sc00…
GO:0045490	pectin catabolic process	biological_process	54	6179	131	55481	1.74E-19	3.21E-18	3.701251098	Cse_sc000311.1_g030.1; Cse_sc000539.1_g150.1; Cse_sc000767.1_g070.1; Cse_sc000883.1_g080.1; Cse_sc001498.1_g030.1; Cse_sc001596.1_g030.1; Cse_sc001743.1_g070.1; Cse_sc001748.1_g160.1; Cse_sc001757.1_g050.1; Cse_sc001888.1_g100.1; Cse_sc001939.1_g050.1; Cse_sc002421.1_g050.1; Cse_sc002577.1_g030.1; Cse_sc002725.1_g020.1; Cse_sc002751.1_g060.1; Cse_sc003439.1_g050.1; Cse_sc005512.1_g040.1; Cse_sc00…
GO:0005975	carbohydrate metabolic process	biological_process	117	6179	446	55481	1.75E-19	3.21E-18	2.355467347	Cse_sc000342.1_g030.1; Cse_sc000362.1_g040.1; Cse_sc000650.1_g060.1; Cse_sc000907.1_g080.1; Cse_sc001121.1_g020.1; Cse_sc001121.1_g030.1; Cse_sc001152.1_g070.1; Cse_sc001201.1_g050.1; Cse_sc001220.1_g050.1; Cse_sc001310.1_g040.1; Cse_sc001347.1_g020.1; Cse_sc001390.1_g040.1; Cse_sc001430.1_g060.1; Cse_sc001499.1_g040.1; Cse_sc001499.1_g080.1; Cse_sc001578.1_g080.1; Cse_sc001578.1_g120.1; Cse_sc00…
GO:0016709	oxidoreductase activity, acting on paired donors, with incorporation or reduction of molecular oxygen, NAD(P)H as one donor, and incorporation of one atom of oxygen	molecular_function	87	6179	287	55481	2.90E-19	5.31E-18	2.72184532	Cse_sc000240.1_g140.1; Cse_sc000343.1_g040.1; Cse_sc000439.1_g050.1; Cse_sc000652.1_g060.1; Cse_sc000654.1_g050.1; Cse_sc001235.1_g010.1; Cse_sc001298.1_g140.1; Cse_sc001363.1_g020.1; Cse_sc001796.1_g070.1; Cse_sc002346.1_g010.1; Cse_sc002380.1_g010.1; Cse_sc002631.1_g040.1; Cse_sc002686.1_g020.1; Cse_sc002838.1_g020.1; Cse_sc003020.1_g020.1; Cse_sc003167.1_g030.1; Cse_sc003687.1_g050.1; Cse_sc00…
GO:0009809	lignin biosynthetic process	biological_process	67	6179	190	55481	3.49E-19	6.36E-18	3.166265194	Cse_sc000122.1_g030.1; Cse_sc000380.1_g120.1; Cse_sc000524.1_g040.1; Cse_sc000788.1_g050.1; Cse_sc001052.1_g070.1; Cse_sc001285.1_g020.1; Cse_sc001285.1_g040.1; Cse_sc001363.1_g020.1; Cse_sc001864.1_g010.1; Cse_sc001898.1_g010.1; Cse_sc002746.1_g030.1; Cse_sc002746.1_g050.1; Cse_sc004366.1_g070.1; Cse_sc004621.1_g080.1; Cse_sc005124.1_g020.1; Cse_sc005145.1_g020.1; Cse_sc005557.1_g070.1; Cse_sc00…
GO:0016042	lipid catabolic process	biological_process	94	6179	342	55481	1.80E-17	3.27E-16	2.467901561	Cse_sc000091.1_g060.1; Cse_sc000186.1_g070.1; Cse_sc000289.1_g040.1; Cse_sc000289.1_g060.1; Cse_sc000334.1_g010.1; Cse_sc000395.1_g030.1; Cse_sc000653.1_g100.1; Cse_sc000902.1_g060.1; Cse_sc000929.1_g130.1; Cse_sc001270.1_g050.1; Cse_sc001278.1_g040.1; Cse_sc001462.1_g040.1; Cse_sc002006.1_g070.1; Cse_sc002278.1_g010.1; Cse_sc002368.1_g030.1; Cse_sc002368.1_g090.1; Cse_sc003011.1_g040.1; Cse_sc00…
GO:0009416	response to light stimulus	biological_process	74	6179	240	55481	3.74E-17	6.74E-16	2.768512974	Cse_sc000001.1_g050.1; Cse_sc000092.1_g080.1; Cse_sc000626.1_g010.1; Cse_sc000663.1_g110.1; Cse_sc000906.1_g080.1; Cse_sc001048.1_g040.1; Cse_sc001094.1_g010.1; Cse_sc001274.1_g040.1; Cse_sc001362.1_g050.1; Cse_sc001986.1_g040.1; Cse_sc002276.1_g040.1; Cse_sc002465.1_g020.1; Cse_sc002695.1_g090.1; Cse_sc003076.1_g060.1; Cse_sc003177.1_g070.1; Cse_sc003573.1_g030.1; Cse_sc004241.1_g050.1; Cse_sc00…
GO:0004497	monooxygenase activity	molecular_function	121	6179	515	55481	4.70E-16	8.43E-15	2.109619962	Cse_sc000091.1_g010.1; Cse_sc000197.1_g040.1; Cse_sc000315.1_g010.1; Cse_sc001046.1_g030.1; Cse_sc001046.1_g040.1; Cse_sc001235.1_g010.1; Cse_sc001274.1_g050.1; Cse_sc001326.1_g060.1; Cse_sc001363.1_g020.1; Cse_sc001560.1_g040.1; Cse_sc001635.1_g050.1; Cse_sc001820.1_g080.1; Cse_sc001993.1_g010.1; Cse_sc002096.1_g040.1; Cse_sc002185.1_g070.1; Cse_sc002663.1_g070.1; Cse_sc003167.1_g080.1; Cse_sc00…
GO:0005509	calcium ion binding	molecular_function	106	6179	432	55481	1.19E-15	2.13E-14	2.203170985	Cse_sc000006.1_g210.1; Cse_sc000224.1_g010.1; Cse_sc000401.1_g060.1; Cse_sc000443.1_g070.1; Cse_sc000644.1_g030.1; Cse_sc000700.1_g110.1; Cse_sc000804.1_g010.1; Cse_sc000919.1_g030.1; Cse_sc001240.1_g050.1; Cse_sc001274.1_g050.1; Cse_sc001291.1_g020.1; Cse_sc001462.1_g040.1; Cse_sc002137.1_g010.1; Cse_sc002368.1_g030.1; Cse_sc002368.1_g090.1; Cse_sc002424.1_g020.1; Cse_sc002586.1_g030.1; Cse_sc00…
GO:0006952	defense response	biological_process	236	6179	1284	55481	3.43E-15	6.11E-14	1.650338626	Cse_sc000009.1_g010.1; Cse_sc000047.1_g010.1; Cse_sc000284.1_g100.1; Cse_sc000305.1_g090.1; Cse_sc000318.1_g010.1; Cse_sc000334.1_g060.1; Cse_sc000334.1_g090.1; Cse_sc000354.1_g050.1; Cse_sc000380.1_g130.1; Cse_sc000392.1_g020.1; Cse_sc000628.1_g070.1; Cse_sc000630.1_g100.1; Cse_sc000805.1_g060.1; Cse_sc000860.1_g020.1; Cse_sc000886.1_g010.1; Cse_sc000907.1_g080.1; Cse_sc000997.1_g080.1; Cse_sc00…
GO:0009705	plant-type vacuole membrane	cellular_component	71	6179	250	55481	1.77E-14	3.14E-13	2.550024923	Cse_sc000215.1_g010.1; Cse_sc000406.1_g030.1; Cse_sc001305.1_g010.1; Cse_sc002153.1_g070.1; Cse_sc002278.1_g010.1; Cse_sc002327.1_g070.1; Cse_sc002968.1_g080.1; Cse_sc003054.1_g010.1; Cse_sc003113.1_g010.1; Cse_sc003189.1_g090.1; Cse_sc003348.1_g020.1; Cse_sc003555.1_g010.1; Cse_sc004009.1_g050.1; Cse_sc004013.1_g030.1; Cse_sc004867.1_g090.1; Cse_sc005780.1_g090.1; Cse_sc007302.1_g020.1; Cse_sc00…
GO:0030599	pectinesterase activity	molecular_function	36	6179	84	55481	2.15E-14	3.78E-13	3.848126142	Cse_sc000311.1_g030.1; Cse_sc000539.1_g150.1; Cse_sc000767.1_g070.1; Cse_sc000883.1_g080.1; Cse_sc001498.1_g030.1; Cse_sc001596.1_g030.1; Cse_sc001743.1_g070.1; Cse_sc001748.1_g160.1; Cse_sc001757.1_g050.1; Cse_sc001888.1_g100.1; Cse_sc001939.1_g050.1; Cse_sc002421.1_g050.1; Cse_sc003439.1_g050.1; Cse_sc005512.1_g040.1; Cse_sc005918.1_g050.1; Cse_sc006194.1_g030.1; Cse_sc007437.1_g010.1; Cse_sc00…
GO:0045330	aspartyl esterase activity	molecular_function	36	6179	84	55481	2.15E-14	3.78E-13	3.848126142	Cse_sc000311.1_g030.1; Cse_sc000539.1_g150.1; Cse_sc000767.1_g070.1; Cse_sc000883.1_g080.1; Cse_sc001498.1_g030.1; Cse_sc001596.1_g030.1; Cse_sc001743.1_g070.1; Cse_sc001748.1_g160.1; Cse_sc001757.1_g050.1; Cse_sc001888.1_g100.1; Cse_sc001939.1_g050.1; Cse_sc002421.1_g050.1; Cse_sc003439.1_g050.1; Cse_sc005512.1_g040.1; Cse_sc005918.1_g050.1; Cse_sc006194.1_g030.1; Cse_sc007437.1_g010.1; Cse_sc00…
GO:0006979	response to oxidative stress	biological_process	102	6179	430	55481	4.07E-14	7.12E-13	2.129893074	Cse_sc000199.1_g050.1; Cse_sc000206.1_g160.1; Cse_sc000244.1_g130.1; Cse_sc000298.1_g080.1; Cse_sc000391.1_g010.1; Cse_sc000418.1_g060.1; Cse_sc000487.1_g040.1; Cse_sc000524.1_g040.1; Cse_sc000788.1_g050.1; Cse_sc001052.1_g070.1; Cse_sc001169.1_g010.1; Cse_sc001345.1_g010.1; Cse_sc001552.1_g040.1; Cse_sc001664.1_g060.1; Cse_sc001898.1_g010.1; Cse_sc002078.1_g070.1; Cse_sc002278.1_g030.1; Cse_sc00…
GO:0005794	Golgi apparatus	cellular_component	260	6179	1484	55481	4.70E-14	8.18E-13	1.573133328	Cse_sc000015.1_g050.1; Cse_sc000037.1_g080.1; Cse_sc000050.1_g150.1; Cse_sc000052.1_g010.1; Cse_sc000080.1_g080.1; Cse_sc000082.1_g170.1; Cse_sc000123.1_g150.1; Cse_sc000139.1_g090.1; Cse_sc000146.1_g080.1; Cse_sc000171.1_g090.1; Cse_sc000183.1_g080.1; Cse_sc000188.1_g090.1; Cse_sc000243.1_g040.1; Cse_sc000286.1_g040.1; Cse_sc000302.1_g030.1; Cse_sc000358.1_g080.1; Cse_sc000412.1_g050.1; Cse_sc00…
GO:0031225	anchored component of membrane	cellular_component	72	6179	262	55481	7.47E-14	1.30E-12	2.467500732	Cse_sc000147.1_g030.1; Cse_sc000229.1_g030.1; Cse_sc000246.1_g140.1; Cse_sc000477.1_g030.1; Cse_sc001189.1_g070.1; Cse_sc001388.1_g080.1; Cse_sc001910.1_g010.1; Cse_sc002597.1_g010.1; Cse_sc003313.1_g050.1; Cse_sc003379.1_g030.1; Cse_sc003956.1_g070.1; Cse_sc004105.1_g020.1; Cse_sc004323.1_g030.1; Cse_sc005237.1_g060.1; Cse_sc005813.1_g010.1; Cse_sc006273.1_g030.1; Cse_sc006473.1_g010.1; Cse_sc00…
GO:0009768	photosynthesis, light harvesting in photosystem I	biological_process	24	6179	43	55481	1.13E-13	1.95E-12	5.011513115	Cse_sc000092.1_g080.1; Cse_sc001094.1_g010.1; Cse_sc001362.1_g050.1; Cse_sc002276.1_g040.1; Cse_sc003076.1_g060.1; Cse_sc008237.1_g050.1; Cse_sc010792.1_g040.1; Cse_sc018644.1_g050.1; Cse_sc020100.1_g020.1; Cse_sc020100.1_g030.1; Cse_sc020955.1_g020.1; Cse_sc021291.1_g020.1; Cse_sc023183.1_g020.1; Cse_sc026179.1_g010.1; Cse_sc028341.1_g030.1; Cse_sc029423.1_g010.1; Cse_sc032295.1_g040.1; Cse_sc03…
GO:0005789	endoplasmic reticulum membrane	cellular_component	244	6179	1385	55481	1.50E-13	2.58E-12	1.581853056	Cse_sc000017.1_g160.1; Cse_sc000019.1_g040.1; Cse_sc000050.1_g150.1; Cse_sc000188.1_g090.1; Cse_sc000198.1_g050.1; Cse_sc000241.1_g180.1; Cse_sc000305.1_g090.1; Cse_sc000432.1_g030.1; Cse_sc000439.1_g050.1; Cse_sc000459.1_g070.1; Cse_sc000534.1_g030.1; Cse_sc000564.1_g020.1; Cse_sc000608.1_g040.1; Cse_sc000630.1_g100.1; Cse_sc000668.1_g030.1; Cse_sc000677.1_g030.1; Cse_sc000758.1_g040.1; Cse_sc00…
GO:0010143	cutin biosynthetic process	biological_process	23	6179	41	55481	2.85E-13	4.89E-12	5.03697812	Cse_sc000389.1_g020.1; Cse_sc001304.1_g010.1; Cse_sc001367.1_g030.1; Cse_sc001698.1_g010.1; Cse_sc002347.1_g010.1; Cse_sc004180.1_g020.1; Cse_sc004382.1_g020.1; Cse_sc004643.1_g030.1; Cse_sc005117.1_g040.1; Cse_sc005237.1_g070.1; Cse_sc007477.1_g020.1; Cse_sc007530.1_g050.1; Cse_sc007625.1_g010.1; Cse_sc008323.1_g010.1; Cse_sc010368.1_g040.1; Cse_sc015652.1_g020.1; Cse_sc015702.1_g010.1; Cse_sc01…
GO:0042744	hydrogen peroxide catabolic process	biological_process	58	6179	196	55481	4.88E-13	8.32E-12	2.657039479	Cse_sc000199.1_g050.1; Cse_sc000206.1_g160.1; Cse_sc000418.1_g060.1; Cse_sc000524.1_g040.1; Cse_sc001169.1_g010.1; Cse_sc001552.1_g040.1; Cse_sc002613.1_g030.1; Cse_sc002746.1_g030.1; Cse_sc002746.1_g050.1; Cse_sc003139.1_g050.1; Cse_sc003535.1_g020.1; Cse_sc004015.1_g070.1; Cse_sc005560.1_g060.1; Cse_sc006988.1_g030.1; Cse_sc007001.1_g030.1; Cse_sc007314.1_g020.1; Cse_sc007507.1_g050.1; Cse_sc00…
GO:0009813	flavonoid biosynthetic process	biological_process	35	6179	88	55481	7.33E-13	1.24E-11	3.571177669	Cse_sc000207.1_g020.1; Cse_sc000681.1_g060.1; Cse_sc001801.1_g070.1; Cse_sc001919.1_g050.1; Cse_sc002465.1_g020.1; Cse_sc003051.1_g020.1; Cse_sc003635.1_g030.1; Cse_sc004833.1_g070.1; Cse_sc005236.1_g020.1; Cse_sc008018.1_g040.1; Cse_sc008230.1_g040.1; Cse_sc008295.1_g050.1; Cse_sc009300.1_g030.1; Cse_sc009435.1_g020.1; Cse_sc010001.1_g020.1; Cse_sc010366.1_g030.1; Cse_sc010629.1_g030.1; Cse_sc01…
GO:0102336	3-oxo-arachidoyl-CoA synthase activity	molecular_function	22	6179	40	55481	1.51E-12	2.52E-11	4.938428548	Cse_sc001048.1_g040.1; Cse_sc004647.1_g050.1; Cse_sc007482.1_g010.1; Cse_sc009705.1_g010.1; Cse_sc010173.1_g020.1; Cse_sc012878.1_g030.1; Cse_sc013492.1_g010.1; Cse_sc015088.1_g010.1; Cse_sc015700.1_g050.1; Cse_sc016967.1_g020.1; Cse_sc020129.1_g010.1; Cse_sc021707.1_g020.1; Cse_sc022004.1_g010.1; Cse_sc022974.1_g010.1; Cse_sc029856.1_g030.1; Cse_sc035807.1_g030.1; Cse_sc038270.1_g010.1; Cse_sc04…
GO:0102337	3-oxo-cerotoyl-CoA synthase activity	molecular_function	22	6179	40	55481	1.51E-12	2.52E-11	4.938428548	Cse_sc001048.1_g040.1; Cse_sc004647.1_g050.1; Cse_sc007482.1_g010.1; Cse_sc009705.1_g010.1; Cse_sc010173.1_g020.1; Cse_sc012878.1_g030.1; Cse_sc013492.1_g010.1; Cse_sc015088.1_g010.1; Cse_sc015700.1_g050.1; Cse_sc016967.1_g020.1; Cse_sc020129.1_g010.1; Cse_sc021707.1_g020.1; Cse_sc022004.1_g010.1; Cse_sc022974.1_g010.1; Cse_sc029856.1_g030.1; Cse_sc035807.1_g030.1; Cse_sc038270.1_g010.1; Cse_sc04…
GO:0102338	3-oxo-lignoceronyl-CoA synthase activity	molecular_function	22	6179	40	55481	1.51E-12	2.52E-11	4.938428548	Cse_sc001048.1_g040.1; Cse_sc004647.1_g050.1; Cse_sc007482.1_g010.1; Cse_sc009705.1_g010.1; Cse_sc010173.1_g020.1; Cse_sc012878.1_g030.1; Cse_sc013492.1_g010.1; Cse_sc015088.1_g010.1; Cse_sc015700.1_g050.1; Cse_sc016967.1_g020.1; Cse_sc020129.1_g010.1; Cse_sc021707.1_g020.1; Cse_sc022004.1_g010.1; Cse_sc022974.1_g010.1; Cse_sc029856.1_g030.1; Cse_sc035807.1_g030.1; Cse_sc038270.1_g010.1; Cse_sc04…
GO:0102756	very-long-chain 3-ketoacyl-CoA synthase activity	molecular_function	22	6179	40	55481	1.51E-12	2.52E-11	4.938428548	Cse_sc001048.1_g040.1; Cse_sc004647.1_g050.1; Cse_sc007482.1_g010.1; Cse_sc009705.1_g010.1; Cse_sc010173.1_g020.1; Cse_sc012878.1_g030.1; Cse_sc013492.1_g010.1; Cse_sc015088.1_g010.1; Cse_sc015700.1_g050.1; Cse_sc016967.1_g020.1; Cse_sc020129.1_g010.1; Cse_sc021707.1_g020.1; Cse_sc022004.1_g010.1; Cse_sc022974.1_g010.1; Cse_sc029856.1_g030.1; Cse_sc035807.1_g030.1; Cse_sc038270.1_g010.1; Cse_sc04…
GO:0046658	anchored component of plasma membrane	cellular_component	71	6179	273	55481	2.06E-12	3.43E-11	2.335187659	Cse_sc000147.1_g030.1; Cse_sc000229.1_g030.1; Cse_sc000246.1_g140.1; Cse_sc000907.1_g080.1; Cse_sc001189.1_g070.1; Cse_sc001310.1_g040.1; Cse_sc001430.1_g060.1; Cse_sc001550.1_g010.1; Cse_sc001910.1_g010.1; Cse_sc002597.1_g010.1; Cse_sc003313.1_g050.1; Cse_sc003329.1_g020.1; Cse_sc003379.1_g030.1; Cse_sc003399.1_g030.1; Cse_sc003472.1_g080.1; Cse_sc004096.1_g110.1; Cse_sc004105.1_g020.1; Cse_sc00…
GO:0016168	chlorophyll binding	molecular_function	40	6179	113	55481	2.16E-12	3.58E-11	3.178393273	Cse_sc000092.1_g080.1; Cse_sc000699.1_g060.1; Cse_sc001094.1_g010.1; Cse_sc001362.1_g050.1; Cse_sc001623.1_g040.1; Cse_sc002276.1_g040.1; Cse_sc003076.1_g060.1; Cse_sc003276.1_g050.1; Cse_sc005001.1_g100.1; Cse_sc005001.1_g110.1; Cse_sc005807.1_g020.1; Cse_sc008237.1_g050.1; Cse_sc010792.1_g040.1; Cse_sc016964.1_g050.1; Cse_sc018644.1_g050.1; Cse_sc019544.1_g020.1; Cse_sc020016.1_g010.1; Cse_sc02…
GO:0071949	FAD binding	molecular_function	49	6179	159	55481	4.67E-12	7.69E-11	2.767101188	Cse_sc000179.1_g050.1; Cse_sc000283.1_g050.1; Cse_sc001873.1_g130.1; Cse_sc001949.1_g030.1; Cse_sc002022.1_g030.1; Cse_sc002571.1_g110.1; Cse_sc002658.1_g030.1; Cse_sc003157.1_g080.1; Cse_sc003548.1_g020.1; Cse_sc004207.1_g010.1; Cse_sc004207.1_g040.1; Cse_sc004241.1_g050.1; Cse_sc004549.1_g090.1; Cse_sc005063.1_g030.1; Cse_sc005779.1_g030.1; Cse_sc007448.1_g030.1; Cse_sc008377.1_g010.1; Cse_sc00…
GO:0004601	peroxidase activity	molecular_function	61	6179	223	55481	5.95E-12	9.77E-11	2.456128344	Cse_sc000199.1_g050.1; Cse_sc000206.1_g160.1; Cse_sc000418.1_g060.1; Cse_sc000524.1_g040.1; Cse_sc000919.1_g030.1; Cse_sc001169.1_g010.1; Cse_sc001552.1_g040.1; Cse_sc002613.1_g030.1; Cse_sc002746.1_g030.1; Cse_sc002746.1_g050.1; Cse_sc003139.1_g050.1; Cse_sc003535.1_g020.1; Cse_sc004015.1_g070.1; Cse_sc004151.1_g020.1; Cse_sc005560.1_g060.1; Cse_sc005822.1_g090.1; Cse_sc006615.1_g020.1; Cse_sc00…
GO:0042545	cell wall modification	biological_process	37	6179	103	55481	7.56E-12	1.24E-10	3.225452009	Cse_sc000311.1_g030.1; Cse_sc000539.1_g150.1; Cse_sc000767.1_g070.1; Cse_sc000883.1_g080.1; Cse_sc001498.1_g030.1; Cse_sc001596.1_g030.1; Cse_sc001743.1_g070.1; Cse_sc001748.1_g160.1; Cse_sc001757.1_g050.1; Cse_sc001888.1_g100.1; Cse_sc001939.1_g050.1; Cse_sc002421.1_g050.1; Cse_sc003439.1_g050.1; Cse_sc005512.1_g040.1; Cse_sc005918.1_g050.1; Cse_sc006194.1_g030.1; Cse_sc007437.1_g010.1; Cse_sc00…
GO:0009737	response to abscisic acid	biological_process	136	6179	688	55481	1.10E-11	1.79E-10	1.774910895	Cse_sc000001.1_g170.1; Cse_sc000008.1_g080.1; Cse_sc000067.1_g030.1; Cse_sc000082.1_g020.1; Cse_sc000149.1_g050.1; Cse_sc000149.1_g070.1; Cse_sc000151.1_g040.1; Cse_sc000392.1_g020.1; Cse_sc000403.1_g010.1; Cse_sc000409.1_g070.1; Cse_sc000461.1_g040.1; Cse_sc000477.1_g130.1; Cse_sc000559.1_g090.1; Cse_sc000586.1_g080.1; Cse_sc000615.1_g030.1; Cse_sc000641.1_g030.1; Cse_sc000669.1_g030.1; Cse_sc00…
GO:0009409	response to cold	biological_process	105	6179	490	55481	1.54E-11	2.50E-10	1.924063071	Cse_sc000001.1_g170.1; Cse_sc000131.1_g130.1; Cse_sc000139.1_g100.1; Cse_sc000311.1_g040.1; Cse_sc000644.1_g030.1; Cse_sc000696.1_g030.1; Cse_sc000804.1_g010.1; Cse_sc001048.1_g040.1; Cse_sc001181.1_g010.1; Cse_sc001207.1_g050.1; Cse_sc001269.1_g070.1; Cse_sc001274.1_g050.1; Cse_sc001462.1_g040.1; Cse_sc001609.1_g030.1; Cse_sc001687.1_g020.1; Cse_sc002660.1_g020.1; Cse_sc002688.1_g080.1; Cse_sc00…
GO:0009738	abscisic acid-activated signaling pathway	biological_process	95	6179	435	55481	4.31E-11	6.94E-10	1.960922517	Cse_sc000001.1_g050.1; Cse_sc000067.1_g030.1; Cse_sc000224.1_g010.1; Cse_sc000409.1_g070.1; Cse_sc000443.1_g070.1; Cse_sc000586.1_g080.1; Cse_sc000615.1_g030.1; Cse_sc000644.1_g030.1; Cse_sc000743.1_g050.1; Cse_sc000852.1_g030.1; Cse_sc000868.1_g040.1; Cse_sc000868.1_g060.1; Cse_sc001011.1_g060.1; Cse_sc001102.1_g090.1; Cse_sc001211.1_g010.1; Cse_sc001293.1_g020.1; Cse_sc001293.1_g040.1; Cse_sc00…
GO:0006636	unsaturated fatty acid biosynthetic process	biological_process	38	6179	113	55481	4.31E-11	6.94E-10	3.01947361	Cse_sc000174.1_g020.1; Cse_sc000174.1_g050.1; Cse_sc000174.1_g060.1; Cse_sc000432.1_g030.1; Cse_sc000534.1_g030.1; Cse_sc000772.1_g060.1; Cse_sc001430.1_g100.1; Cse_sc001614.1_g080.1; Cse_sc001737.1_g050.1; Cse_sc002686.1_g030.1; Cse_sc002690.1_g100.1; Cse_sc003285.1_g010.1; Cse_sc003577.1_g060.1; Cse_sc004888.1_g030.1; Cse_sc005315.1_g010.1; Cse_sc006912.1_g020.1; Cse_sc007276.1_g060.1; Cse_sc01…
GO:0006633	fatty acid biosynthetic process	biological_process	56	6179	207	55481	6.26E-11	1.00E-09	2.429090898	Cse_sc000141.1_g040.1; Cse_sc001048.1_g040.1; Cse_sc001614.1_g080.1; Cse_sc001934.1_g060.1; Cse_sc002156.1_g120.1; Cse_sc002257.1_g030.1; Cse_sc002311.1_g040.1; Cse_sc002389.1_g010.1; Cse_sc002389.1_g050.1; Cse_sc003465.1_g040.1; Cse_sc003577.1_g060.1; Cse_sc003583.1_g060.1; Cse_sc003925.1_g090.1; Cse_sc004571.1_g020.1; Cse_sc004647.1_g050.1; Cse_sc004762.1_g010.1; Cse_sc005465.1_g050.1; Cse_sc00…
GO:0022857	transmembrane transporter activity	molecular_function	50	6179	175	55481	6.65E-11	1.06E-09	2.565417428	Cse_sc000162.1_g030.1; Cse_sc000228.1_g150.1; Cse_sc002577.1_g020.1; Cse_sc002858.1_g020.1; Cse_sc002887.1_g100.1; Cse_sc003054.1_g010.1; Cse_sc003440.1_g010.1; Cse_sc003450.1_g010.1; Cse_sc003747.1_g070.1; Cse_sc004867.1_g090.1; Cse_sc006217.1_g060.1; Cse_sc007970.1_g030.1; Cse_sc008019.1_g010.1; Cse_sc008681.1_g030.1; Cse_sc009202.1_g010.1; Cse_sc010064.1_g020.1; Cse_sc011253.1_g020.1; Cse_sc01…
GO:0035251	UDP-glucosyltransferase activity	molecular_function	39	6179	120	55481	8.32E-11	1.32E-09	2.918162324	Cse_sc000380.1_g120.1; Cse_sc000855.1_g010.1; Cse_sc000863.1_g110.1; Cse_sc001094.1_g100.1; Cse_sc001845.1_g010.1; Cse_sc001845.1_g020.1; Cse_sc002203.1_g030.1; Cse_sc002203.1_g040.1; Cse_sc003395.1_g020.1; Cse_sc003705.1_g040.1; Cse_sc006700.1_g040.1; Cse_sc006700.1_g050.1; Cse_sc007407.1_g060.1; Cse_sc008588.1_g040.1; Cse_sc009355.1_g030.1; Cse_sc009399.1_g040.1; Cse_sc011156.1_g010.1; Cse_sc01…
GO:0009522	photosystem I	cellular_component	33	6179	92	55481	8.86E-11	1.40E-09	3.220714271	Cse_sc000092.1_g080.1; Cse_sc000699.1_g060.1; Cse_sc001094.1_g010.1; Cse_sc001362.1_g050.1; Cse_sc002276.1_g040.1; Cse_sc003076.1_g060.1; Cse_sc003276.1_g050.1; Cse_sc005001.1_g100.1; Cse_sc005001.1_g110.1; Cse_sc006742.1_g030.1; Cse_sc008237.1_g050.1; Cse_sc010792.1_g040.1; Cse_sc018644.1_g050.1; Cse_sc019544.1_g020.1; Cse_sc020016.1_g010.1; Cse_sc020100.1_g020.1; Cse_sc020100.1_g030.1; Cse_sc02…
GO:0031410	cytoplasmic vesicle	cellular_component	26	6179	62	55481	9.39E-11	1.48E-09	3.765370741	Cse_sc000839.1_g070.1; Cse_sc001137.1_g080.1; Cse_sc001468.1_g030.1; Cse_sc001812.1_g070.1; Cse_sc001949.1_g030.1; Cse_sc003438.1_g020.1; Cse_sc005759.1_g020.1; Cse_sc008642.1_g020.1; Cse_sc010380.1_g060.1; Cse_sc011315.1_g020.1; Cse_sc013354.1_g030.1; Cse_sc014529.1_g020.1; Cse_sc014529.1_g030.1; Cse_sc016333.1_g020.1; Cse_sc016525.1_g020.1; Cse_sc017629.1_g020.1; Cse_sc019077.1_g010.1; Cse_sc02…
GO:0009651	response to salt stress	biological_process	162	6179	889	55481	1.15E-10	1.81E-09	1.636211115	Cse_sc000001.1_g170.1; Cse_sc000033.1_g080.1; Cse_sc000052.1_g010.1; Cse_sc000082.1_g020.1; Cse_sc000123.1_g150.1; Cse_sc000197.1_g060.1; Cse_sc000198.1_g050.1; Cse_sc000311.1_g040.1; Cse_sc000338.1_g080.1; Cse_sc000380.1_g120.1; Cse_sc000392.1_g020.1; Cse_sc000439.1_g080.1; Cse_sc000553.1_g090.1; Cse_sc000648.1_g050.1; Cse_sc000726.1_g020.1; Cse_sc000797.1_g030.1; Cse_sc000804.1_g010.1; Cse_sc00…
GO:0090447	glycerol-3-phosphate 2-O-acyltransferase activity	molecular_function	12	6179	16	55481	1.62E-10	2.53E-09	6.734220748	Cse_sc000389.1_g020.1; Cse_sc001304.1_g010.1; Cse_sc004382.1_g020.1; Cse_sc004643.1_g030.1; Cse_sc007477.1_g020.1; Cse_sc007625.1_g010.1; Cse_sc008323.1_g010.1; Cse_sc010368.1_g040.1; Cse_sc015702.1_g010.1; Cse_sc021053.1_g030.1; Cse_sc025295.1_g020.1; Cse_sc037009.1_g010.1
GO:0016705	oxidoreductase activity, acting on paired donors, with incorporation or reduction of molecular oxygen	molecular_function	90	6179	419	55481	3.27E-10	5.09E-09	1.928655107	Cse_sc000091.1_g010.1; Cse_sc000315.1_g010.1; Cse_sc001046.1_g030.1; Cse_sc001046.1_g040.1; Cse_sc001418.1_g070.1; Cse_sc001560.1_g040.1; Cse_sc001635.1_g050.1; Cse_sc001820.1_g080.1; Cse_sc001993.1_g010.1; Cse_sc002096.1_g040.1; Cse_sc002185.1_g070.1; Cse_sc002663.1_g070.1; Cse_sc003167.1_g080.1; Cse_sc003292.1_g050.1; Cse_sc003635.1_g030.1; Cse_sc003829.1_g020.1; Cse_sc003887.1_g020.1; Cse_sc00…
GO:0042343	indole glucosinolate metabolic process	biological_process	26	6179	66	55481	5.24E-10	8.14E-09	3.537166453	Cse_sc000654.1_g050.1; Cse_sc001796.1_g070.1; Cse_sc002686.1_g020.1; Cse_sc005033.1_g020.1; Cse_sc005195.1_g040.1; Cse_sc006021.1_g080.1; Cse_sc006687.1_g040.1; Cse_sc007794.1_g010.1; Cse_sc008319.1_g020.1; Cse_sc012519.1_g020.1; Cse_sc012639.1_g020.1; Cse_sc012639.1_g030.1; Cse_sc013346.1_g040.1; Cse_sc014004.1_g010.1; Cse_sc014122.1_g040.1; Cse_sc015673.1_g040.1; Cse_sc018830.1_g010.1; Cse_sc02…
GO:0018298	protein-chromophore linkage	biological_process	44	6179	154	55481	7.74E-10	1.20E-08	2.565417428	Cse_sc000092.1_g080.1; Cse_sc000699.1_g060.1; Cse_sc001094.1_g010.1; Cse_sc001362.1_g050.1; Cse_sc001623.1_g040.1; Cse_sc002276.1_g040.1; Cse_sc003076.1_g060.1; Cse_sc003276.1_g050.1; Cse_sc004241.1_g050.1; Cse_sc005001.1_g100.1; Cse_sc005001.1_g110.1; Cse_sc008237.1_g050.1; Cse_sc008436.1_g030.1; Cse_sc010792.1_g040.1; Cse_sc012529.1_g010.1; Cse_sc013843.1_g020.1; Cse_sc016964.1_g050.1; Cse_sc01…
GO:0044212	transcription regulatory region DNA binding	molecular_function	106	6179	533	55481	1.17E-09	1.80E-08	1.785684551	Cse_sc000044.1_g080.1; Cse_sc000067.1_g060.1; Cse_sc000102.1_g110.1; Cse_sc000324.1_g040.1; Cse_sc000365.1_g010.1; Cse_sc000374.1_g030.1; Cse_sc000380.1_g060.1; Cse_sc000392.1_g020.1; Cse_sc000732.1_g040.1; Cse_sc000885.1_g050.1; Cse_sc001023.1_g030.1; Cse_sc001139.1_g050.1; Cse_sc001365.1_g020.1; Cse_sc001465.1_g080.1; Cse_sc001525.1_g050.1; Cse_sc001552.1_g070.1; Cse_sc001556.1_g020.1; Cse_sc00…
GO:0008194	UDP-glycosyltransferase activity	molecular_function	39	6179	131	55481	1.60E-09	2.45E-08	2.673125793	Cse_sc000284.1_g120.1; Cse_sc000380.1_g120.1; Cse_sc000380.1_g130.1; Cse_sc000848.1_g030.1; Cse_sc001347.1_g020.1; Cse_sc001845.1_g010.1; Cse_sc001845.1_g020.1; Cse_sc002203.1_g020.1; Cse_sc002592.1_g020.1; Cse_sc003646.1_g060.1; Cse_sc003952.1_g040.1; Cse_sc004282.1_g010.1; Cse_sc008709.1_g060.1; Cse_sc009432.1_g010.1; Cse_sc010548.1_g010.1; Cse_sc013365.1_g030.1; Cse_sc015392.1_g040.1; Cse_sc01…
GO:0009414	response to water deprivation	biological_process	115	6179	596	55481	1.62E-09	2.48E-08	1.732517642	Cse_sc000037.1_g080.1; Cse_sc000047.1_g010.1; Cse_sc000151.1_g040.1; Cse_sc000224.1_g010.1; Cse_sc000244.1_g130.1; Cse_sc000311.1_g040.1; Cse_sc000391.1_g010.1; Cse_sc000605.1_g090.1; Cse_sc000644.1_g030.1; Cse_sc000804.1_g010.1; Cse_sc000852.1_g020.1; Cse_sc000885.1_g070.1; Cse_sc000989.1_g040.1; Cse_sc000997.1_g080.1; Cse_sc001232.1_g010.1; Cse_sc001305.1_g010.1; Cse_sc001543.1_g030.1; Cse_sc00…
GO:0016717	oxidoreductase activity, acting on paired donors, with oxidation of a pair of donors resulting in the reduction of molecular oxygen to two molecules of water	molecular_function	28	6179	78	55481	1.78E-09	2.70E-08	3.223216768	Cse_sc000174.1_g020.1; Cse_sc000174.1_g050.1; Cse_sc000174.1_g060.1; Cse_sc000432.1_g030.1; Cse_sc000534.1_g030.1; Cse_sc001430.1_g100.1; Cse_sc001737.1_g050.1; Cse_sc002686.1_g030.1; Cse_sc002690.1_g100.1; Cse_sc003285.1_g010.1; Cse_sc004888.1_g030.1; Cse_sc005315.1_g010.1; Cse_sc007276.1_g060.1; Cse_sc010243.1_g020.1; Cse_sc011027.1_g020.1; Cse_sc011151.1_g040.1; Cse_sc015423.1_g030.1; Cse_sc02…
GO:0016788	hydrolase activity, acting on ester bonds	molecular_function	45	6179	164	55481	2.18E-09	3.30E-08	2.463739298	Cse_sc000091.1_g060.1; Cse_sc000289.1_g040.1; Cse_sc000289.1_g060.1; Cse_sc000902.1_g060.1; Cse_sc001270.1_g050.1; Cse_sc001278.1_g040.1; Cse_sc002006.1_g070.1; Cse_sc002590.1_g010.1; Cse_sc002747.1_g050.1; Cse_sc003364.1_g020.1; Cse_sc004305.1_g010.1; Cse_sc004995.1_g010.1; Cse_sc005036.1_g060.1; Cse_sc005600.1_g050.1; Cse_sc006510.1_g020.1; Cse_sc006781.1_g020.1; Cse_sc008635.1_g020.1; Cse_sc00…
GO:0005874	microtubule	cellular_component	87	6179	419	55481	3.57E-09	5.39E-08	1.864366603	Cse_sc000026.1_g020.1; Cse_sc000088.1_g130.1; Cse_sc000221.1_g090.1; Cse_sc000234.1_g010.1; Cse_sc000257.1_g110.1; Cse_sc000324.1_g020.1; Cse_sc000488.1_g080.1; Cse_sc000595.1_g010.1; Cse_sc000839.1_g070.1; Cse_sc000941.1_g080.1; Cse_sc000971.1_g060.1; Cse_sc001060.1_g030.1; Cse_sc001212.1_g030.1; Cse_sc001566.1_g050.1; Cse_sc001656.1_g030.1; Cse_sc001676.1_g060.1; Cse_sc001841.1_g030.1; Cse_sc00…
GO:0010287	plastoglobule	cellular_component	36	6179	119	55481	3.71E-09	5.58E-08	2.716324335	Cse_sc000092.1_g080.1; Cse_sc000092.1_g120.1; Cse_sc000204.1_g060.1; Cse_sc000580.1_g060.1; Cse_sc001094.1_g010.1; Cse_sc001362.1_g050.1; Cse_sc002276.1_g040.1; Cse_sc002688.1_g090.1; Cse_sc003076.1_g060.1; Cse_sc008235.1_g030.1; Cse_sc008237.1_g050.1; Cse_sc008928.1_g020.1; Cse_sc009011.1_g040.1; Cse_sc010640.1_g050.1; Cse_sc010792.1_g040.1; Cse_sc012021.1_g010.1; Cse_sc013797.1_g040.1; Cse_sc01…
GO:0005516	calmodulin binding	molecular_function	76	6179	352	55481	5.12E-09	7.68E-08	1.938639306	Cse_sc000131.1_g130.1; Cse_sc000158.1_g010.1; Cse_sc000324.1_g020.1; Cse_sc000338.1_g080.1; Cse_sc000595.1_g010.1; Cse_sc000660.1_g020.1; Cse_sc000986.1_g060.1; Cse_sc001192.1_g050.1; Cse_sc001514.1_g020.1; Cse_sc001595.1_g050.1; Cse_sc002345.1_g030.1; Cse_sc002478.1_g020.1; Cse_sc002717.1_g020.1; Cse_sc002854.1_g020.1; Cse_sc003082.1_g060.1; Cse_sc003084.1_g040.1; Cse_sc003659.1_g010.1; Cse_sc00…
GO:0009734	auxin-activated signaling pathway	biological_process	98	6179	495	55481	5.83E-09	8.70E-08	1.777652884	Cse_sc000044.1_g030.1; Cse_sc000074.1_g100.1; Cse_sc000076.1_g130.1; Cse_sc000082.1_g120.1; Cse_sc000098.1_g130.1; Cse_sc000245.1_g020.1; Cse_sc000331.1_g010.1; Cse_sc000389.1_g050.1; Cse_sc000403.1_g120.1; Cse_sc000429.1_g040.1; Cse_sc000623.1_g030.1; Cse_sc000906.1_g030.1; Cse_sc000939.1_g040.1; Cse_sc001128.1_g030.1; Cse_sc001164.1_g040.1; Cse_sc001217.1_g070.1; Cse_sc001582.1_g030.1; Cse_sc00…
GO:0010200	response to chitin	biological_process	63	6179	273	55481	5.93E-09	8.83E-08	2.072067922	Cse_sc000047.1_g010.1; Cse_sc000067.1_g060.1; Cse_sc000885.1_g050.1; Cse_sc000997.1_g080.1; Cse_sc001124.1_g030.1; Cse_sc001139.1_g040.1; Cse_sc001139.1_g050.1; Cse_sc001556.1_g020.1; Cse_sc001609.1_g050.1; Cse_sc001617.1_g070.1; Cse_sc001714.1_g090.1; Cse_sc001790.1_g050.1; Cse_sc002411.1_g030.1; Cse_sc002509.1_g030.1; Cse_sc003051.1_g050.1; Cse_sc003163.1_g070.1; Cse_sc003214.1_g050.1; Cse_sc00…
GO:0055114	oxidation-reduction process	biological_process	47	6179	180	55481	6.06E-09	8.98E-08	2.344506483	Cse_sc000311.1_g040.1; Cse_sc000834.1_g090.1; Cse_sc001036.1_g040.1; Cse_sc001235.1_g010.1; Cse_sc001326.1_g060.1; Cse_sc001743.1_g050.1; Cse_sc001803.1_g020.1; Cse_sc001820.1_g080.1; Cse_sc001873.1_g050.1; Cse_sc002006.1_g110.1; Cse_sc002294.1_g050.1; Cse_sc002557.1_g090.1; Cse_sc002663.1_g070.1; Cse_sc002790.1_g050.1; Cse_sc003029.1_g020.1; Cse_sc003621.1_g050.1; Cse_sc003912.1_g050.1; Cse_sc00…
GO:0055085	transmembrane transport	biological_process	57	6179	239	55481	7.89E-09	1.17E-07	2.141425844	Cse_sc000037.1_g080.1; Cse_sc000138.1_g100.1; Cse_sc000149.1_g050.1; Cse_sc000149.1_g070.1; Cse_sc000296.1_g050.1; Cse_sc000327.1_g080.1; Cse_sc000403.1_g010.1; Cse_sc000477.1_g130.1; Cse_sc000612.1_g010.1; Cse_sc000802.1_g030.1; Cse_sc001077.1_g050.1; Cse_sc001434.1_g040.1; Cse_sc001537.1_g050.1; Cse_sc002301.1_g020.1; Cse_sc002354.1_g020.1; Cse_sc003052.1_g020.1; Cse_sc003258.1_g020.1; Cse_sc00…
GO:0009607	response to biotic stimulus	biological_process	27	6179	78	55481	8.36E-09	1.23E-07	3.108101884	Cse_sc000354.1_g050.1; Cse_sc001234.1_g020.1; Cse_sc001273.1_g070.1; Cse_sc002268.1_g010.1; Cse_sc002345.1_g030.1; Cse_sc002502.1_g050.1; Cse_sc002502.1_g070.1; Cse_sc002502.1_g080.1; Cse_sc005445.1_g020.1; Cse_sc005475.1_g020.1; Cse_sc006002.1_g010.1; Cse_sc006075.1_g020.1; Cse_sc006327.1_g050.1; Cse_sc007788.1_g020.1; Cse_sc008293.1_g030.1; Cse_sc008897.1_g050.1; Cse_sc010758.1_g040.1; Cse_sc01…
GO:0090406	pollen tube	cellular_component	22	6179	56	55481	9.01E-09	1.32E-07	3.527448963	Cse_sc000039.1_g050.1; Cse_sc000162.1_g060.1; Cse_sc000257.1_g060.1; Cse_sc000619.1_g020.1; Cse_sc000623.1_g100.1; Cse_sc000732.1_g040.1; Cse_sc001748.1_g160.1; Cse_sc002421.1_g050.1; Cse_sc003101.1_g030.1; Cse_sc004195.1_g010.1; Cse_sc004926.1_g060.1; Cse_sc005512.1_g040.1; Cse_sc006025.1_g010.1; Cse_sc006612.1_g010.1; Cse_sc008692.1_g010.1; Cse_sc012343.1_g020.1; Cse_sc012890.1_g010.1; Cse_sc01…
GO:0004185	serine-type carboxypeptidase activity	molecular_function	36	6179	123	55481	1.01E-08	1.47E-07	2.627988584	Cse_sc000001.1_g110.1; Cse_sc000025.1_g080.1; Cse_sc000169.1_g060.1; Cse_sc000269.1_g040.1; Cse_sc000409.1_g080.1; Cse_sc000884.1_g040.1; Cse_sc002317.1_g010.1; Cse_sc002645.1_g060.1; Cse_sc002757.1_g010.1; Cse_sc002759.1_g030.1; Cse_sc003002.1_g030.1; Cse_sc003236.1_g010.1; Cse_sc003249.1_g070.1; Cse_sc003329.1_g030.1; Cse_sc003980.1_g030.1; Cse_sc005229.1_g040.1; Cse_sc005586.1_g010.1; Cse_sc00…
GO:0046910	pectinesterase inhibitor activity	molecular_function	24	6179	65	55481	1.03E-08	1.49E-07	3.315308676	Cse_sc000311.1_g030.1; Cse_sc000539.1_g150.1; Cse_sc001498.1_g030.1; Cse_sc001596.1_g030.1; Cse_sc001748.1_g160.1; Cse_sc001888.1_g100.1; Cse_sc002421.1_g050.1; Cse_sc003439.1_g050.1; Cse_sc004736.1_g010.1; Cse_sc004736.1_g020.1; Cse_sc006158.1_g050.1; Cse_sc006194.1_g030.1; Cse_sc009488.1_g050.1; Cse_sc011646.1_g020.1; Cse_sc012205.1_g010.1; Cse_sc012463.1_g020.1; Cse_sc013351.1_g040.1; Cse_sc01…
GO:0080167	response to karrikin	biological_process	44	6179	166	55481	1.03E-08	1.49E-07	2.379965565	Cse_sc000716.1_g120.1; Cse_sc000772.1_g060.1; Cse_sc001240.1_g050.1; Cse_sc001305.1_g010.1; Cse_sc001845.1_g010.1; Cse_sc001845.1_g020.1; Cse_sc001983.1_g030.1; Cse_sc002003.1_g050.1; Cse_sc002153.1_g070.1; Cse_sc002310.1_g090.1; Cse_sc002424.1_g050.1; Cse_sc002509.1_g030.1; Cse_sc003113.1_g010.1; Cse_sc003585.1_g060.1; Cse_sc003652.1_g020.1; Cse_sc003933.1_g010.1; Cse_sc004009.1_g050.1; Cse_sc00…
GO:0009523	photosystem II	cellular_component	30	6179	93	55481	1.06E-08	1.53E-07	2.896439031	Cse_sc000092.1_g080.1; Cse_sc001094.1_g010.1; Cse_sc001362.1_g050.1; Cse_sc001623.1_g040.1; Cse_sc003076.1_g060.1; Cse_sc005807.1_g020.1; Cse_sc008237.1_g050.1; Cse_sc010792.1_g040.1; Cse_sc016964.1_g050.1; Cse_sc018644.1_g050.1; Cse_sc019544.1_g020.1; Cse_sc020100.1_g020.1; Cse_sc020100.1_g030.1; Cse_sc020955.1_g020.1; Cse_sc021291.1_g020.1; Cse_sc022081.1_g010.1; Cse_sc022176.1_g030.1; Cse_sc02…
GO:0002253	activation of immune response	biological_process	9	6179	12	55481	1.56E-08	2.24E-07	6.734220748	Cse_sc003393.1_g030.1; Cse_sc003627.1_g050.1; Cse_sc003627.1_g060.1; Cse_sc005916.1_g010.1; Cse_sc008908.1_g030.1; Cse_sc015340.1_g010.1; Cse_sc019032.1_g010.1; Cse_sc039919.1_g010.1; Cse_sc049061.1_g020.1
GO:0045165	cell fate commitment	biological_process	7	6179	8	55481	2.36E-08	3.38E-07	7.856590872	Cse_sc000753.1_g070.1; Cse_sc006528.1_g010.1; Cse_sc007271.1_g010.1; Cse_sc011972.1_g050.1; Cse_sc011999.1_g020.1; Cse_sc023298.1_g020.1; Cse_sc029081.1_g010.1
GO:0005774	vacuolar membrane	cellular_component	171	6179	1022	55481	2.47E-08	3.53E-07	1.502350617	Cse_sc000037.1_g080.1; Cse_sc000050.1_g150.1; Cse_sc000138.1_g100.1; Cse_sc000149.1_g050.1; Cse_sc000149.1_g070.1; Cse_sc000188.1_g090.1; Cse_sc000197.1_g060.1; Cse_sc000215.1_g010.1; Cse_sc000229.1_g030.1; Cse_sc000296.1_g050.1; Cse_sc000338.1_g080.1; Cse_sc000403.1_g010.1; Cse_sc000406.1_g030.1; Cse_sc000477.1_g130.1; Cse_sc000564.1_g020.1; Cse_sc000597.1_g040.1; Cse_sc000666.1_g020.1; Cse_sc00…
GO:0030570	pectate lyase activity	molecular_function	17	6179	38	55481	2.49E-08	3.54E-07	4.016903604	Cse_sc002577.1_g030.1; Cse_sc002725.1_g020.1; Cse_sc002751.1_g060.1; Cse_sc010178.1_g010.1; Cse_sc011823.1_g020.1; Cse_sc013565.1_g070.1; Cse_sc014261.1_g020.1; Cse_sc016245.1_g030.1; Cse_sc021844.1_g050.1; Cse_sc021997.1_g020.1; Cse_sc029147.1_g030.1; Cse_sc029740.1_g030.1; Cse_sc030981.1_g020.1; Cse_sc033731.1_g010.1; Cse_sc060220.1_g010.1; Cse_sc079855.1_g010.1; Cse_sc088503.1_g010.1
GO:0080092	regulation of pollen tube growth	biological_process	19	6179	46	55481	2.60E-08	3.69E-07	3.708701281	Cse_sc000039.1_g050.1; Cse_sc000659.1_g060.1; Cse_sc000732.1_g040.1; Cse_sc001713.1_g030.1; Cse_sc002223.1_g060.1; Cse_sc004195.1_g010.1; Cse_sc005503.1_g050.1; Cse_sc007199.1_g050.1; Cse_sc008356.1_g040.1; Cse_sc009315.1_g020.1; Cse_sc010271.1_g010.1; Cse_sc010730.1_g050.1; Cse_sc012890.1_g010.1; Cse_sc014683.1_g020.1; Cse_sc020579.1_g010.1; Cse_sc035058.1_g010.1; Cse_sc042925.1_g020.1; Cse_sc04…
GO:0010597	green leaf volatile biosynthetic process	biological_process	13	6179	24	55481	2.93E-08	4.15E-07	4.863603873	Cse_sc000849.1_g050.1; Cse_sc001600.1_g070.1; Cse_sc001708.1_g010.1; Cse_sc005622.1_g030.1; Cse_sc005630.1_g010.1; Cse_sc007115.1_g040.1; Cse_sc007115.1_g050.1; Cse_sc008313.1_g010.1; Cse_sc012896.1_g010.1; Cse_sc020193.1_g020.1; Cse_sc029915.1_g040.1; Cse_sc063544.1_g010.1; Cse_sc202961.1_g010.1
GO:0009873	ethylene-activated signaling pathway	biological_process	80	6179	392	55481	3.08E-08	4.35E-07	1.83244102	Cse_sc000067.1_g060.1; Cse_sc000076.1_g020.1; Cse_sc000118.1_g010.1; Cse_sc000244.1_g100.1; Cse_sc000334.1_g060.1; Cse_sc000334.1_g090.1; Cse_sc000458.1_g110.1; Cse_sc000608.1_g040.1; Cse_sc000628.1_g070.1; Cse_sc000885.1_g050.1; Cse_sc001124.1_g030.1; Cse_sc002283.1_g040.1; Cse_sc002571.1_g060.1; Cse_sc002577.1_g070.1; Cse_sc002594.1_g060.1; Cse_sc002781.1_g030.1; Cse_sc003051.1_g050.1; Cse_sc00…
GO:0042973	glucan endo-1,3-beta-D-glucosidase activity	molecular_function	27	6179	83	55481	3.98E-08	5.59E-07	2.92086683	Cse_sc000907.1_g080.1; Cse_sc001310.1_g040.1; Cse_sc001430.1_g060.1; Cse_sc001910.1_g010.1; Cse_sc002245.1_g020.1; Cse_sc002775.1_g050.1; Cse_sc003371.1_g030.1; Cse_sc003458.1_g030.1; Cse_sc004145.1_g060.1; Cse_sc004239.1_g020.1; Cse_sc006155.1_g060.1; Cse_sc006327.1_g050.1; Cse_sc007510.1_g010.1; Cse_sc008117.1_g040.1; Cse_sc009259.1_g010.1; Cse_sc009704.1_g010.1; Cse_sc013645.1_g030.1; Cse_sc01…
GO:0031408	oxylipin biosynthetic process	biological_process	41	6179	157	55481	4.71E-08	6.60E-07	2.344824209	Cse_sc000432.1_g030.1; Cse_sc000597.1_g060.1; Cse_sc000849.1_g050.1; Cse_sc001430.1_g100.1; Cse_sc001583.1_g020.1; Cse_sc001600.1_g070.1; Cse_sc001708.1_g010.1; Cse_sc001987.1_g080.1; Cse_sc002367.1_g010.1; Cse_sc002686.1_g030.1; Cse_sc003285.1_g010.1; Cse_sc004228.1_g050.1; Cse_sc005315.1_g010.1; Cse_sc005622.1_g030.1; Cse_sc005630.1_g010.1; Cse_sc006615.1_g020.1; Cse_sc007115.1_g040.1; Cse_sc00…
GO:0009739	response to gibberellin	biological_process	39	6179	146	55481	4.78E-08	6.65E-07	2.398489581	Cse_sc000028.1_g020.1; Cse_sc000324.1_g040.1; Cse_sc000338.1_g080.1; Cse_sc000461.1_g040.1; Cse_sc000641.1_g030.1; Cse_sc000732.1_g040.1; Cse_sc001687.1_g020.1; Cse_sc001794.1_g030.1; Cse_sc002248.1_g040.1; Cse_sc002467.1_g050.1; Cse_sc005536.1_g070.1; Cse_sc005660.1_g020.1; Cse_sc007069.1_g040.1; Cse_sc007648.1_g030.1; Cse_sc010048.1_g030.1; Cse_sc010068.1_g040.1; Cse_sc010140.1_g030.1; Cse_sc01…
GO:0007275	multicellular organism development	biological_process	113	6179	618	55481	4.79E-08	6.65E-07	1.641784131	Cse_sc000028.1_g020.1; Cse_sc000102.1_g110.1; Cse_sc000223.1_g120.1; Cse_sc000245.1_g030.1; Cse_sc000306.1_g020.1; Cse_sc000388.1_g010.1; Cse_sc000389.1_g050.1; Cse_sc000641.1_g030.1; Cse_sc000906.1_g080.1; Cse_sc000926.1_g080.1; Cse_sc000999.1_g060.1; Cse_sc001229.1_g020.1; Cse_sc001235.1_g010.1; Cse_sc001525.1_g050.1; Cse_sc001820.1_g080.1; Cse_sc002594.1_g060.1; Cse_sc002873.1_g080.1; Cse_sc00…
GO:0006813	potassium ion transport	biological_process	32	6179	109	55481	5.19E-08	7.19E-07	2.636025247	Cse_sc000001.1_g160.1; Cse_sc001041.1_g130.1; Cse_sc001274.1_g100.1; Cse_sc001553.1_g050.1; Cse_sc002068.1_g030.1; Cse_sc002471.1_g030.1; Cse_sc003204.1_g020.1; Cse_sc003315.1_g020.1; Cse_sc004057.1_g010.1; Cse_sc004544.1_g020.1; Cse_sc008149.1_g020.1; Cse_sc008422.1_g020.1; Cse_sc008487.1_g050.1; Cse_sc010589.1_g020.1; Cse_sc010870.1_g060.1; Cse_sc013668.1_g010.1; Cse_sc014799.1_g030.1; Cse_sc01…
GO:0005856	cytoskeleton	cellular_component	39	6179	147	55481	5.86E-08	8.09E-07	2.382173326	Cse_sc000009.1_g090.1; Cse_sc000659.1_g050.1; Cse_sc001321.1_g010.1; Cse_sc001783.1_g110.1; Cse_sc002142.1_g060.1; Cse_sc002355.1_g030.1; Cse_sc002679.1_g040.1; Cse_sc002711.1_g040.1; Cse_sc002945.1_g030.1; Cse_sc003007.1_g070.1; Cse_sc003227.1_g040.1; Cse_sc003351.1_g040.1; Cse_sc004747.1_g020.1; Cse_sc005651.1_g040.1; Cse_sc005740.1_g020.1; Cse_sc006082.1_g020.1; Cse_sc006780.1_g020.1; Cse_sc00…
GO:0052689	carboxylic ester hydrolase activity	molecular_function	38	6179	142	55481	6.50E-08	8.94E-07	2.402820548	Cse_sc000071.1_g030.1; Cse_sc000127.1_g010.1; Cse_sc000172.1_g050.1; Cse_sc000339.1_g070.1; Cse_sc000893.1_g020.1; Cse_sc000893.1_g060.1; Cse_sc000893.1_g070.1; Cse_sc001145.1_g090.1; Cse_sc001233.1_g060.1; Cse_sc001699.1_g010.1; Cse_sc001748.1_g010.1; Cse_sc001886.1_g020.1; Cse_sc002157.1_g050.1; Cse_sc008123.1_g040.1; Cse_sc008929.1_g010.1; Cse_sc010010.1_g040.1; Cse_sc010084.1_g060.1; Cse_sc01…
GO:0006874	cellular calcium ion homeostasis	biological_process	18	6179	44	55481	6.62E-08	9.07E-07	3.673211317	Cse_sc000401.1_g060.1; Cse_sc000660.1_g020.1; Cse_sc001291.1_g020.1; Cse_sc002424.1_g020.1; Cse_sc002846.1_g050.1; Cse_sc002846.1_g060.1; Cse_sc002846.1_g080.1; Cse_sc007265.1_g020.1; Cse_sc007344.1_g030.1; Cse_sc012718.1_g010.1; Cse_sc015080.1_g020.1; Cse_sc015225.1_g010.1; Cse_sc020940.1_g030.1; Cse_sc021055.1_g010.1; Cse_sc023754.1_g010.1; Cse_sc028787.1_g030.1; Cse_sc039152.1_g010.1; Cse_sc04…
GO:0009860	pollen tube growth	biological_process	43	6179	171	55481	7.90E-08	1.08E-06	2.257867385	Cse_sc000039.1_g050.1; Cse_sc000224.1_g010.1; Cse_sc000263.1_g070.1; Cse_sc000420.1_g200.1; Cse_sc000501.1_g070.1; Cse_sc000660.1_g020.1; Cse_sc000804.1_g010.1; Cse_sc000866.1_g070.1; Cse_sc000999.1_g060.1; Cse_sc001506.1_g100.1; Cse_sc001514.1_g020.1; Cse_sc001595.1_g110.1; Cse_sc001713.1_g030.1; Cse_sc002277.1_g010.1; Cse_sc003101.1_g030.1; Cse_sc004195.1_g010.1; Cse_sc004926.1_g060.1; Cse_sc00…
GO:0042742	defense response to bacterium	biological_process	120	6179	673	55481	8.19E-08	1.11E-06	1.601003447	Cse_sc000017.1_g020.1; Cse_sc000050.1_g150.1; Cse_sc000149.1_g050.1; Cse_sc000149.1_g070.1; Cse_sc000188.1_g090.1; Cse_sc000298.1_g080.1; Cse_sc000365.1_g010.1; Cse_sc000403.1_g010.1; Cse_sc000466.1_g040.1; Cse_sc000466.1_g080.1; Cse_sc000477.1_g130.1; Cse_sc000605.1_g090.1; Cse_sc000637.1_g030.1; Cse_sc000886.1_g010.1; Cse_sc001139.1_g040.1; Cse_sc001139.1_g050.1; Cse_sc001287.1_g110.1; Cse_sc00…
GO:0016324	apical plasma membrane	cellular_component	14	6179	29	55481	8.28E-08	1.12E-06	4.334670826	Cse_sc000660.1_g020.1; Cse_sc000999.1_g060.1; Cse_sc004926.1_g060.1; Cse_sc006612.1_g010.1; Cse_sc008692.1_g010.1; Cse_sc019033.1_g020.1; Cse_sc019830.1_g030.1; Cse_sc020940.1_g030.1; Cse_sc023049.1_g010.1; Cse_sc029976.1_g020.1; Cse_sc044355.1_g010.1; Cse_sc046043.1_g010.1; Cse_sc048148.1_g020.1; Cse_sc302601.1_g010.1
GO:0003846	2-acylglycerol O-acyltransferase activity	molecular_function	11	6179	19	55481	8.53E-08	1.15E-06	5.19834584	Cse_sc000788.1_g050.1; Cse_sc001052.1_g070.1; Cse_sc001898.1_g010.1; Cse_sc004621.1_g080.1; Cse_sc005145.1_g020.1; Cse_sc012502.1_g030.1; Cse_sc017245.1_g030.1; Cse_sc017319.1_g030.1; Cse_sc025580.1_g010.1; Cse_sc031946.1_g020.1; Cse_sc041953.1_g010.1
GO:0090430	caffeoyl-CoA: alcohol caffeoyl transferase activity	molecular_function	11	6179	19	55481	8.53E-08	1.15E-06	5.19834584	Cse_sc000788.1_g050.1; Cse_sc001052.1_g070.1; Cse_sc001898.1_g010.1; Cse_sc004621.1_g080.1; Cse_sc005145.1_g020.1; Cse_sc012502.1_g030.1; Cse_sc017245.1_g030.1; Cse_sc017319.1_g030.1; Cse_sc025580.1_g010.1; Cse_sc031946.1_g020.1; Cse_sc041953.1_g010.1
GO:0009723	response to ethylene	biological_process	63	6179	292	55481	8.86E-08	1.19E-06	1.937241585	Cse_sc000076.1_g020.1; Cse_sc000082.1_g120.1; Cse_sc000244.1_g100.1; Cse_sc000608.1_g040.1; Cse_sc000641.1_g030.1; Cse_sc001217.1_g070.1; Cse_sc001365.1_g020.1; Cse_sc001687.1_g020.1; Cse_sc001794.1_g030.1; Cse_sc002106.1_g040.1; Cse_sc002283.1_g040.1; Cse_sc002465.1_g020.1; Cse_sc002577.1_g070.1; Cse_sc003546.1_g070.1; Cse_sc003651.1_g030.1; Cse_sc003732.1_g060.1; Cse_sc003901.1_g050.1; Cse_sc00…
GO:0006865	amino acid transport	biological_process	26	6179	81	55481	9.17E-08	1.23E-06	2.882135629	Cse_sc003054.1_g010.1; Cse_sc003351.1_g030.1; Cse_sc003747.1_g070.1; Cse_sc008877.1_g040.1; Cse_sc009049.1_g010.1; Cse_sc011321.1_g050.1; Cse_sc015605.1_g020.1; Cse_sc019792.1_g020.1; Cse_sc019832.1_g010.1; Cse_sc021329.1_g010.1; Cse_sc025292.1_g010.1; Cse_sc028692.1_g030.1; Cse_sc042505.1_g020.1; Cse_sc048641.1_g010.1; Cse_sc055254.1_g020.1; Cse_sc061808.1_g010.1; Cse_sc062564.1_g010.1; Cse_sc07…
GO:0080043	quercetin 3-O-glucosyltransferase activity	molecular_function	34	6179	122	55481	9.29E-08	1.24E-06	2.502333393	Cse_sc000284.1_g120.1; Cse_sc000380.1_g120.1; Cse_sc000380.1_g130.1; Cse_sc000848.1_g030.1; Cse_sc001845.1_g010.1; Cse_sc001845.1_g020.1; Cse_sc002203.1_g020.1; Cse_sc002592.1_g020.1; Cse_sc003646.1_g060.1; Cse_sc008709.1_g060.1; Cse_sc010548.1_g010.1; Cse_sc013365.1_g030.1; Cse_sc015392.1_g040.1; Cse_sc020422.1_g010.1; Cse_sc021511.1_g020.1; Cse_sc022192.1_g020.1; Cse_sc022192.1_g030.1; Cse_sc02…
GO:0080044	quercetin 7-O-glucosyltransferase activity	molecular_function	34	6179	122	55481	9.29E-08	1.24E-06	2.502333393	Cse_sc000284.1_g120.1; Cse_sc000380.1_g120.1; Cse_sc000380.1_g130.1; Cse_sc000848.1_g030.1; Cse_sc001845.1_g010.1; Cse_sc001845.1_g020.1; Cse_sc002203.1_g020.1; Cse_sc002592.1_g020.1; Cse_sc003646.1_g060.1; Cse_sc008709.1_g060.1; Cse_sc010548.1_g010.1; Cse_sc013365.1_g030.1; Cse_sc015392.1_g040.1; Cse_sc020422.1_g010.1; Cse_sc021511.1_g020.1; Cse_sc022192.1_g020.1; Cse_sc022192.1_g030.1; Cse_sc02…
GO:0008017	microtubule binding	molecular_function	69	6179	331	55481	1.00E-07	1.33E-06	1.871747156	Cse_sc000026.1_g020.1; Cse_sc000088.1_g130.1; Cse_sc000221.1_g090.1; Cse_sc000234.1_g010.1; Cse_sc000257.1_g110.1; Cse_sc000324.1_g020.1; Cse_sc000462.1_g140.1; Cse_sc000488.1_g080.1; Cse_sc000595.1_g010.1; Cse_sc000941.1_g080.1; Cse_sc000971.1_g060.1; Cse_sc000989.1_g040.1; Cse_sc001212.1_g030.1; Cse_sc001566.1_g050.1; Cse_sc001656.1_g030.1; Cse_sc001841.1_g030.1; Cse_sc001907.1_g030.1; Cse_sc00…
GO:0016758	transferase activity, transferring hexosyl groups	molecular_function	38	6179	145	55481	1.19E-07	1.58E-06	2.35310702	Cse_sc000578.1_g060.1; Cse_sc000907.1_g110.1; Cse_sc001788.1_g010.1; Cse_sc002742.1_g060.1; Cse_sc002742.1_g080.1; Cse_sc003451.1_g060.1; Cse_sc004282.1_g010.1; Cse_sc004815.1_g060.1; Cse_sc004942.1_g010.1; Cse_sc005495.1_g020.1; Cse_sc005682.1_g030.1; Cse_sc006270.1_g020.1; Cse_sc006721.1_g040.1; Cse_sc009432.1_g010.1; Cse_sc011841.1_g020.1; Cse_sc014835.1_g030.1; Cse_sc018493.1_g040.1; Cse_sc01…
GO:0012505	endomembrane system	cellular_component	36	6179	135	55481	1.48E-07	1.94E-06	2.394389599	Cse_sc000001.1_g160.1; Cse_sc000619.1_g020.1; Cse_sc001313.1_g010.1; Cse_sc001470.1_g080.1; Cse_sc001506.1_g010.1; Cse_sc001553.1_g050.1; Cse_sc002120.1_g040.1; Cse_sc002471.1_g030.1; Cse_sc002714.1_g010.1; Cse_sc003085.1_g020.1; Cse_sc003204.1_g020.1; Cse_sc004544.1_g020.1; Cse_sc005246.1_g030.1; Cse_sc007495.1_g020.1; Cse_sc007682.1_g010.1; Cse_sc008373.1_g020.1; Cse_sc008487.1_g050.1; Cse_sc01…
GO:0070588	calcium ion transmembrane transport	biological_process	17	6179	42	55481	1.69E-07	2.21E-06	3.634341356	Cse_sc000401.1_g060.1; Cse_sc001291.1_g020.1; Cse_sc002424.1_g020.1; Cse_sc002846.1_g050.1; Cse_sc002846.1_g060.1; Cse_sc002846.1_g080.1; Cse_sc007344.1_g030.1; Cse_sc010140.1_g050.1; Cse_sc012718.1_g010.1; Cse_sc015080.1_g020.1; Cse_sc015225.1_g010.1; Cse_sc021055.1_g010.1; Cse_sc023754.1_g010.1; Cse_sc028787.1_g030.1; Cse_sc030124.1_g010.1; Cse_sc039152.1_g010.1; Cse_sc040734.1_g010.1
GO:0040008	regulation of growth	biological_process	65	6179	310	55481	1.76E-07	2.31E-06	1.88268537	Cse_sc000074.1_g100.1; Cse_sc000076.1_g130.1; Cse_sc000091.1_g010.1; Cse_sc000388.1_g010.1; Cse_sc000926.1_g080.1; Cse_sc000989.1_g040.1; Cse_sc000999.1_g060.1; Cse_sc001274.1_g040.1; Cse_sc001595.1_g110.1; Cse_sc002631.1_g040.1; Cse_sc002873.1_g080.1; Cse_sc002894.1_g080.1; Cse_sc002977.1_g040.1; Cse_sc003849.1_g070.1; Cse_sc004113.1_g040.1; Cse_sc004997.1_g030.1; Cse_sc005154.1_g060.1; Cse_sc00…
GO:0015840	urea transport	biological_process	7	6179	9	55481	1.91E-07	2.48E-06	6.983636331	Cse_sc000162.1_g060.1; Cse_sc000215.1_g010.1; Cse_sc003348.1_g020.1; Cse_sc010612.1_g020.1; Cse_sc012068.1_g040.1; Cse_sc018808.1_g010.1; Cse_sc040717.1_g010.1
GO:0045430	chalcone isomerase activity	molecular_function	7	6179	9	55481	1.91E-07	2.48E-06	6.983636331	Cse_sc001801.1_g070.1; Cse_sc010698.1_g010.1; Cse_sc010698.1_g020.1; Cse_sc021211.1_g010.1; Cse_sc044100.1_g020.1; Cse_sc051542.1_g010.1; Cse_sc053048.1_g010.1
GO:0004622	lysophospholipase activity	molecular_function	11	6179	20	55481	1.91E-07	2.48E-06	4.938428548	Cse_sc000788.1_g050.1; Cse_sc001052.1_g070.1; Cse_sc001898.1_g010.1; Cse_sc004621.1_g080.1; Cse_sc005145.1_g020.1; Cse_sc012502.1_g030.1; Cse_sc017245.1_g030.1; Cse_sc017319.1_g030.1; Cse_sc025580.1_g010.1; Cse_sc031946.1_g020.1; Cse_sc041953.1_g010.1
GO:0008234	cysteine-type peptidase activity	molecular_function	21	6179	60	55481	2.10E-07	2.70E-06	3.142636349	Cse_sc000805.1_g060.1; Cse_sc001137.1_g080.1; Cse_sc001598.1_g020.1; Cse_sc006139.1_g010.1; Cse_sc010068.1_g040.1; Cse_sc010380.1_g060.1; Cse_sc011315.1_g020.1; Cse_sc011972.1_g100.1; Cse_sc013354.1_g030.1; Cse_sc014529.1_g020.1; Cse_sc014529.1_g030.1; Cse_sc016333.1_g020.1; Cse_sc017629.1_g020.1; Cse_sc020433.1_g020.1; Cse_sc026105.1_g010.1; Cse_sc027510.1_g020.1; Cse_sc033506.1_g040.1; Cse_sc03…
GO:1990059	fruit valve development	biological_process	6	6179	7	55481	2.12E-07	2.72E-06	7.696252283	Cse_sc005565.1_g020.1; Cse_sc005814.1_g070.1; Cse_sc007082.1_g040.1; Cse_sc015981.1_g010.1; Cse_sc020475.1_g020.1; Cse_sc066455.1_g010.1
GO:0008126	acetylesterase activity	molecular_function	6	6179	7	55481	2.12E-07	2.72E-06	7.696252283	Cse_sc007849.1_g030.1; Cse_sc009599.1_g010.1; Cse_sc010057.1_g020.1; Cse_sc022103.1_g040.1; Cse_sc047914.1_g010.1; Cse_sc047914.1_g020.1
GO:0030001	metal ion transport	biological_process	22	6179	65	55481	2.37E-07	3.03E-06	3.039032953	Cse_sc000026.1_g170.1; Cse_sc000043.1_g030.1; Cse_sc000075.1_g070.1; Cse_sc000093.1_g010.1; Cse_sc000456.1_g090.1; Cse_sc000988.1_g060.1; Cse_sc001384.1_g160.1; Cse_sc004074.1_g130.1; Cse_sc005991.1_g020.1; Cse_sc006802.1_g050.1; Cse_sc008540.1_g020.1; Cse_sc008621.1_g020.1; Cse_sc010163.1_g010.1; Cse_sc011724.1_g030.1; Cse_sc014182.1_g010.1; Cse_sc014598.1_g040.1; Cse_sc019129.1_g020.1; Cse_sc02…
GO:0010025	wax biosynthetic process	biological_process	33	6179	121	55481	2.43E-07	3.10E-06	2.448807545	Cse_sc000241.1_g180.1; Cse_sc000668.1_g030.1; Cse_sc001198.1_g020.1; Cse_sc001367.1_g030.1; Cse_sc001698.1_g010.1; Cse_sc002216.1_g020.1; Cse_sc002216.1_g040.1; Cse_sc002755.1_g010.1; Cse_sc002755.1_g040.1; Cse_sc002755.1_g080.1; Cse_sc004427.1_g070.1; Cse_sc006152.1_g040.1; Cse_sc006565.1_g060.1; Cse_sc009584.1_g010.1; Cse_sc009584.1_g020.1; Cse_sc012616.1_g030.1; Cse_sc012616.1_g050.1; Cse_sc01…
GO:0004709	MAP kinase kinase kinase activity	molecular_function	20	6179	56	55481	2.53E-07	3.21E-06	3.206771785	Cse_sc000050.1_g230.1; Cse_sc000067.1_g030.1; Cse_sc000615.1_g030.1; Cse_sc000868.1_g040.1; Cse_sc000868.1_g060.1; Cse_sc001011.1_g060.1; Cse_sc001181.1_g010.1; Cse_sc001609.1_g030.1; Cse_sc001676.1_g060.1; Cse_sc002691.1_g020.1; Cse_sc002691.1_g030.1; Cse_sc003901.1_g050.1; Cse_sc004808.1_g010.1; Cse_sc004818.1_g060.1; Cse_sc010485.1_g010.1; Cse_sc017105.1_g030.1; Cse_sc019439.1_g010.1; Cse_sc01…
GO:0051603	proteolysis involved in cellular protein catabolic process	biological_process	35	6179	133	55481	3.02E-07	3.83E-06	2.362884473	Cse_sc000409.1_g080.1; Cse_sc002317.1_g010.1; Cse_sc002757.1_g010.1; Cse_sc003236.1_g010.1; Cse_sc003329.1_g030.1; Cse_sc003980.1_g030.1; Cse_sc004397.1_g020.1; Cse_sc004512.1_g060.1; Cse_sc005229.1_g040.1; Cse_sc005586.1_g010.1; Cse_sc006445.1_g010.1; Cse_sc007179.1_g040.1; Cse_sc007179.1_g050.1; Cse_sc007780.1_g020.1; Cse_sc008595.1_g020.1; Cse_sc009540.1_g030.1; Cse_sc012831.1_g040.1; Cse_sc01…
GO:0004857	enzyme inhibitor activity	molecular_function	18	6179	48	55481	3.49E-07	4.40E-06	3.367110374	Cse_sc000226.1_g070.1; Cse_sc002930.1_g050.1; Cse_sc002930.1_g060.1; Cse_sc003577.1_g050.1; Cse_sc004736.1_g010.1; Cse_sc004736.1_g020.1; Cse_sc004884.1_g030.1; Cse_sc005918.1_g050.1; Cse_sc006158.1_g050.1; Cse_sc007437.1_g010.1; Cse_sc008452.1_g030.1; Cse_sc010430.1_g020.1; Cse_sc010623.1_g030.1; Cse_sc015974.1_g010.1; Cse_sc020136.1_g020.1; Cse_sc022888.1_g020.1; Cse_sc026766.1_g010.1; Cse_sc04…
GO:0051213	dioxygenase activity	molecular_function	49	6179	216	55481	3.85E-07	4.85E-06	2.03689393	Cse_sc000604.1_g030.1; Cse_sc000716.1_g120.1; Cse_sc000979.1_g090.1; Cse_sc001418.1_g020.1; Cse_sc001695.1_g050.1; Cse_sc002381.1_g060.1; Cse_sc002467.1_g050.1; Cse_sc002556.1_g080.1; Cse_sc003051.1_g020.1; Cse_sc003827.1_g020.1; Cse_sc004555.1_g010.1; Cse_sc004633.1_g030.1; Cse_sc004833.1_g070.1; Cse_sc005236.1_g020.1; Cse_sc005275.1_g020.1; Cse_sc005323.1_g040.1; Cse_sc005838.1_g010.1; Cse_sc00…
GO:0010555	response to mannitol	biological_process	8	6179	12	55481	4.21E-07	5.27E-06	5.985973998	Cse_sc001401.1_g010.1; Cse_sc005793.1_g050.1; Cse_sc008007.1_g050.1; Cse_sc019405.1_g020.1; Cse_sc038290.1_g020.1; Cse_sc039399.1_g010.1; Cse_sc044512.1_g010.1; Cse_sc073221.1_g010.1
GO:0043231	intracellular membrane-bounded organelle	cellular_component	52	6179	235	55481	4.23E-07	5.28E-06	1.986833923	Cse_sc000276.1_g070.1; Cse_sc000284.1_g120.1; Cse_sc000380.1_g120.1; Cse_sc000380.1_g130.1; Cse_sc000848.1_g030.1; Cse_sc001274.1_g050.1; Cse_sc001347.1_g020.1; Cse_sc001845.1_g010.1; Cse_sc001845.1_g020.1; Cse_sc002203.1_g020.1; Cse_sc002592.1_g020.1; Cse_sc003646.1_g060.1; Cse_sc003952.1_g040.1; Cse_sc004282.1_g010.1; Cse_sc006453.1_g030.1; Cse_sc008363.1_g030.1; Cse_sc008709.1_g060.1; Cse_sc00…
GO:0009789	positive regulation of abscisic acid-activated signaling pathway	biological_process	28	6179	97	55481	4.38E-07	5.42E-06	2.59186503	Cse_sc000067.1_g030.1; Cse_sc000615.1_g030.1; Cse_sc000732.1_g040.1; Cse_sc001011.1_g060.1; Cse_sc001211.1_g010.1; Cse_sc001315.1_g020.1; Cse_sc001462.1_g040.1; Cse_sc001633.1_g100.1; Cse_sc002120.1_g040.1; Cse_sc002261.1_g060.1; Cse_sc005010.1_g100.1; Cse_sc006912.1_g020.1; Cse_sc007210.1_g040.1; Cse_sc007495.1_g020.1; Cse_sc007997.1_g040.1; Cse_sc010225.1_g030.1; Cse_sc010655.1_g030.1; Cse_sc01…
GO:0009833	plant-type primary cell wall biogenesis	biological_process	28	6179	97	55481	4.38E-07	5.42E-06	2.59186503	Cse_sc000412.1_g050.1; Cse_sc000605.1_g090.1; Cse_sc000758.1_g020.1; Cse_sc000926.1_g040.1; Cse_sc000989.1_g040.1; Cse_sc001000.1_g030.1; Cse_sc001000.1_g060.1; Cse_sc001753.1_g020.1; Cse_sc003001.1_g090.1; Cse_sc004004.1_g050.1; Cse_sc004708.1_g050.1; Cse_sc007946.1_g040.1; Cse_sc011610.1_g020.1; Cse_sc014044.1_g020.1; Cse_sc016488.1_g030.1; Cse_sc018106.1_g010.1; Cse_sc018368.1_g030.1; Cse_sc02…
GO:0016760	cellulose synthase (UDP-forming) activity	molecular_function	28	6179	97	55481	4.38E-07	5.42E-06	2.59186503	Cse_sc000412.1_g050.1; Cse_sc000605.1_g090.1; Cse_sc000758.1_g020.1; Cse_sc000926.1_g040.1; Cse_sc001000.1_g030.1; Cse_sc001000.1_g060.1; Cse_sc001643.1_g010.1; Cse_sc001753.1_g020.1; Cse_sc003001.1_g090.1; Cse_sc004004.1_g050.1; Cse_sc004708.1_g050.1; Cse_sc007946.1_g040.1; Cse_sc011610.1_g020.1; Cse_sc012398.1_g040.1; Cse_sc014044.1_g020.1; Cse_sc016488.1_g030.1; Cse_sc018368.1_g030.1; Cse_sc02…
GO:0015369	calcium:proton antiporter activity	molecular_function	15	6179	36	55481	4.46E-07	5.51E-06	3.741233749	Cse_sc000401.1_g060.1; Cse_sc001291.1_g020.1; Cse_sc002424.1_g020.1; Cse_sc002846.1_g050.1; Cse_sc002846.1_g060.1; Cse_sc002846.1_g080.1; Cse_sc007344.1_g030.1; Cse_sc012718.1_g010.1; Cse_sc015080.1_g020.1; Cse_sc015225.1_g010.1; Cse_sc021055.1_g010.1; Cse_sc023754.1_g010.1; Cse_sc028787.1_g030.1; Cse_sc039152.1_g010.1; Cse_sc040734.1_g010.1
GO:0005802	trans-Golgi network	cellular_component	103	6179	578	55481	6.14E-07	7.56E-06	1.600057063	Cse_sc000006.1_g210.1; Cse_sc000052.1_g010.1; Cse_sc000123.1_g150.1; Cse_sc000183.1_g080.1; Cse_sc000224.1_g020.1; Cse_sc000243.1_g040.1; Cse_sc000286.1_g040.1; Cse_sc000358.1_g080.1; Cse_sc000412.1_g050.1; Cse_sc000430.1_g010.1; Cse_sc000528.1_g070.1; Cse_sc000553.1_g090.1; Cse_sc000570.1_g080.1; Cse_sc000605.1_g090.1; Cse_sc000666.1_g020.1; Cse_sc000758.1_g020.1; Cse_sc000926.1_g040.1; Cse_sc00…
GO:0005507	copper ion binding	molecular_function	65	6179	321	55481	6.62E-07	8.12E-06	1.818169672	Cse_sc000026.1_g170.1; Cse_sc000133.1_g050.1; Cse_sc000141.1_g040.1; Cse_sc000456.1_g090.1; Cse_sc001023.1_g100.1; Cse_sc002133.1_g030.1; Cse_sc003321.1_g010.1; Cse_sc003578.1_g030.1; Cse_sc003792.1_g020.1; Cse_sc003816.1_g070.1; Cse_sc003845.1_g020.1; Cse_sc003933.1_g010.1; Cse_sc004061.1_g020.1; Cse_sc004261.1_g020.1; Cse_sc004685.1_g060.1; Cse_sc005287.1_g030.1; Cse_sc005648.1_g050.1; Cse_sc00…
GO:0042626	ATPase activity, coupled to transmembrane movement of substances	molecular_function	66	6179	328	55481	7.00E-07	8.56E-06	1.806742152	Cse_sc000031.1_g090.1; Cse_sc000037.1_g080.1; Cse_sc000138.1_g100.1; Cse_sc000149.1_g050.1; Cse_sc000149.1_g070.1; Cse_sc000276.1_g070.1; Cse_sc000296.1_g050.1; Cse_sc000403.1_g010.1; Cse_sc000477.1_g130.1; Cse_sc000612.1_g010.1; Cse_sc000802.1_g030.1; Cse_sc000944.1_g030.1; Cse_sc001373.1_g090.1; Cse_sc001434.1_g040.1; Cse_sc001537.1_g050.1; Cse_sc001653.1_g080.1; Cse_sc002354.1_g020.1; Cse_sc00…
GO:0080144	amino acid homeostasis	biological_process	15	6179	37	55481	7.04E-07	8.59E-06	3.640119323	Cse_sc003054.1_g010.1; Cse_sc003321.1_g010.1; Cse_sc019792.1_g020.1; Cse_sc019832.1_g010.1; Cse_sc025292.1_g010.1; Cse_sc028692.1_g030.1; Cse_sc062564.1_g010.1; Cse_sc073301.1_g010.1; Cse_sc085415.1_g010.1; Cse_sc085452.1_g010.1; Cse_sc109456.1_g010.1; Cse_sc126178.1_g010.1; Cse_sc174007.1_g010.1; Cse_sc193764.1_g010.1; Cse_sc237499.1_g010.1
GO:0015250	water channel activity	molecular_function	14	6179	33	55481	7.15E-07	8.70E-06	3.809256181	Cse_sc000162.1_g060.1; Cse_sc000215.1_g010.1; Cse_sc001543.1_g030.1; Cse_sc002091.1_g140.1; Cse_sc002267.1_g040.1; Cse_sc002382.1_g030.1; Cse_sc003348.1_g020.1; Cse_sc004013.1_g030.1; Cse_sc008550.1_g090.1; Cse_sc010612.1_g020.1; Cse_sc012068.1_g040.1; Cse_sc013053.1_g020.1; Cse_sc029567.1_g020.1; Cse_sc036633.1_g010.1
GO:0004650	polygalacturonase activity	molecular_function	22	6179	69	55481	8.04E-07	9.74E-06	2.862857129	Cse_sc000342.1_g030.1; Cse_sc001121.1_g020.1; Cse_sc001121.1_g030.1; Cse_sc002403.1_g020.1; Cse_sc002470.1_g020.1; Cse_sc002597.1_g010.1; Cse_sc002888.1_g080.1; Cse_sc003602.1_g030.1; Cse_sc005237.1_g060.1; Cse_sc009156.1_g020.1; Cse_sc010280.1_g050.1; Cse_sc011934.1_g010.1; Cse_sc013866.1_g010.1; Cse_sc018107.1_g020.1; Cse_sc018789.1_g020.1; Cse_sc018810.1_g010.1; Cse_sc023554.1_g010.1; Cse_sc02…
GO:2000038	regulation of stomatal complex development	biological_process	7	6179	10	55481	8.62E-07	1.04E-05	6.285272698	Cse_sc000067.1_g030.1; Cse_sc000615.1_g030.1; Cse_sc001011.1_g060.1; Cse_sc010544.1_g050.1; Cse_sc017754.1_g030.1; Cse_sc019439.1_g010.1; Cse_sc019439.1_g030.1
GO:0006631	fatty acid metabolic process	biological_process	28	6179	100	55481	8.84E-07	1.07E-05	2.514109079	Cse_sc000172.1_g050.1; Cse_sc001367.1_g030.1; Cse_sc001642.1_g080.1; Cse_sc003085.1_g050.1; Cse_sc005545.1_g040.1; Cse_sc006258.1_g010.1; Cse_sc007167.1_g020.1; Cse_sc007849.1_g030.1; Cse_sc009599.1_g010.1; Cse_sc010057.1_g020.1; Cse_sc010193.1_g030.1; Cse_sc011032.1_g030.1; Cse_sc011102.1_g030.1; Cse_sc011731.1_g080.1; Cse_sc013453.1_g010.1; Cse_sc014375.1_g030.1; Cse_sc014539.1_g030.1; Cse_sc01…
GO:0006869	lipid transport	biological_process	41	6179	174	55481	9.85E-07	1.18E-05	2.115732189	Cse_sc000012.1_g170.1; Cse_sc000071.1_g040.1; Cse_sc000276.1_g070.1; Cse_sc000682.1_g070.1; Cse_sc001074.1_g030.1; Cse_sc001205.1_g010.1; Cse_sc001205.1_g020.1; Cse_sc001205.1_g060.1; Cse_sc001414.1_g020.1; Cse_sc001849.1_g020.1; Cse_sc002629.1_g060.1; Cse_sc002629.1_g100.1; Cse_sc003956.1_g070.1; Cse_sc004365.1_g110.1; Cse_sc005569.1_g060.1; Cse_sc006603.1_g020.1; Cse_sc007820.1_g030.1; Cse_sc00…
GO:0009979	16:0 monogalactosyldiacylglycerol desaturase activity	molecular_function	12	6179	26	55481	1.02E-06	1.22E-05	4.144135845	Cse_sc000432.1_g030.1; Cse_sc001430.1_g100.1; Cse_sc002686.1_g030.1; Cse_sc003285.1_g010.1; Cse_sc005315.1_g010.1; Cse_sc007276.1_g060.1; Cse_sc024318.1_g030.1; Cse_sc025027.1_g020.1; Cse_sc026195.1_g020.1; Cse_sc039568.1_g010.1; Cse_sc069527.1_g010.1; Cse_sc069653.1_g010.1
GO:0016899	oxidoreductase activity, acting on the CH-OH group of donors, oxygen as acceptor	molecular_function	10	6179	19	55481	1.04E-06	1.24E-05	4.725768946	Cse_sc000179.1_g050.1; Cse_sc001873.1_g130.1; Cse_sc011594.1_g020.1; Cse_sc015069.1_g010.1; Cse_sc019342.1_g020.1; Cse_sc024231.1_g010.1; Cse_sc024517.1_g020.1; Cse_sc033092.1_g010.1; Cse_sc051048.1_g010.1; Cse_sc261820.1_g010.1
GO:0005887	integral component of plasma membrane	cellular_component	56	6179	267	55481	1.06E-06	1.27E-05	1.883227775	Cse_sc000406.1_g030.1; Cse_sc000619.1_g020.1; Cse_sc000659.1_g040.1; Cse_sc000871.1_g050.1; Cse_sc000913.1_g050.1; Cse_sc001519.1_g040.1; Cse_sc001756.1_g010.1; Cse_sc002003.1_g050.1; Cse_sc002322.1_g070.1; Cse_sc002695.1_g090.1; Cse_sc003410.1_g020.1; Cse_sc004070.1_g030.1; Cse_sc004419.1_g020.1; Cse_sc004878.1_g030.1; Cse_sc005679.1_g010.1; Cse_sc006212.1_g040.1; Cse_sc009205.1_g040.1; Cse_sc00…
GO:0051707	response to other organism	biological_process	15	6179	38	55481	1.09E-06	1.29E-05	3.544326709	Cse_sc000076.1_g020.1; Cse_sc002592.1_g020.1; Cse_sc003472.1_g080.1; Cse_sc003951.1_g040.1; Cse_sc003982.1_g020.1; Cse_sc004430.1_g050.1; Cse_sc006882.1_g040.1; Cse_sc009061.1_g030.1; Cse_sc009581.1_g010.1; Cse_sc010077.1_g020.1; Cse_sc010661.1_g040.1; Cse_sc011350.1_g010.1; Cse_sc014155.1_g010.1; Cse_sc024589.1_g020.1; Cse_sc029120.1_g020.1
GO:0003993	acid phosphatase activity	molecular_function	26	6179	91	55481	1.27E-06	1.50E-05	2.565417428	Cse_sc000485.1_g160.1; Cse_sc001419.1_g090.1; Cse_sc002258.1_g050.1; Cse_sc002747.1_g050.1; Cse_sc003535.1_g020.1; Cse_sc004780.1_g030.1; Cse_sc006132.1_g080.1; Cse_sc006806.1_g020.1; Cse_sc007975.1_g020.1; Cse_sc009070.1_g020.1; Cse_sc011501.1_g020.1; Cse_sc011958.1_g010.1; Cse_sc012138.1_g020.1; Cse_sc012358.1_g050.1; Cse_sc012425.1_g040.1; Cse_sc014089.1_g050.1; Cse_sc015612.1_g020.1; Cse_sc01…
GO:0016165	linoleate 13S-lipoxygenase activity	molecular_function	15	6179	39	55481	1.66E-06	1.96E-05	3.453446537	Cse_sc000849.1_g050.1; Cse_sc001600.1_g070.1; Cse_sc001708.1_g010.1; Cse_sc005622.1_g030.1; Cse_sc005630.1_g010.1; Cse_sc007115.1_g040.1; Cse_sc007115.1_g050.1; Cse_sc008313.1_g010.1; Cse_sc012896.1_g010.1; Cse_sc020193.1_g020.1; Cse_sc029915.1_g040.1; Cse_sc036416.1_g010.1; Cse_sc063544.1_g010.1; Cse_sc202961.1_g010.1; Cse_sc249461.1_g010.1
GO:0102985	Delta12-fatty-acid desaturase activity	molecular_function	5	6179	6	55481	1.90E-06	2.24E-05	7.482467497	Cse_sc011692.1_g030.1; Cse_sc024425.1_g030.1; Cse_sc026507.1_g010.1; Cse_sc029172.1_g010.1; Cse_sc055074.1_g010.1
GO:0004553	hydrolase activity, hydrolyzing O-glycosyl compounds	molecular_function	20	6179	63	55481	2.39E-06	2.80E-05	2.850463809	Cse_sc000362.1_g040.1; Cse_sc000566.1_g070.1; Cse_sc000651.1_g030.1; Cse_sc000651.1_g090.1; Cse_sc000651.1_g110.1; Cse_sc000726.1_g040.1; Cse_sc001083.1_g050.1; Cse_sc001519.1_g040.1; Cse_sc002506.1_g020.1; Cse_sc003175.1_g020.1; Cse_sc003820.1_g090.1; Cse_sc006887.1_g030.1; Cse_sc007617.1_g030.1; Cse_sc011078.1_g040.1; Cse_sc017824.1_g020.1; Cse_sc019365.1_g050.1; Cse_sc021751.1_g020.1; Cse_sc02…
GO:0010411	xyloglucan metabolic process	biological_process	22	6179	73	55481	2.44E-06	2.85E-05	2.705988246	Cse_sc000566.1_g070.1; Cse_sc000651.1_g030.1; Cse_sc000651.1_g090.1; Cse_sc000651.1_g110.1; Cse_sc000726.1_g040.1; Cse_sc001519.1_g040.1; Cse_sc002506.1_g020.1; Cse_sc003175.1_g020.1; Cse_sc003820.1_g090.1; Cse_sc004256.1_g050.1; Cse_sc006887.1_g030.1; Cse_sc007556.1_g050.1; Cse_sc011078.1_g040.1; Cse_sc013115.1_g050.1; Cse_sc013547.1_g020.1; Cse_sc017824.1_g020.1; Cse_sc019365.1_g050.1; Cse_sc02…
GO:0006885	regulation of pH	biological_process	11	6179	24	55481	2.67E-06	3.12E-05	4.115357124	Cse_sc000001.1_g160.1; Cse_sc001553.1_g050.1; Cse_sc002471.1_g030.1; Cse_sc003204.1_g020.1; Cse_sc004544.1_g020.1; Cse_sc008487.1_g050.1; Cse_sc013668.1_g010.1; Cse_sc016455.1_g050.1; Cse_sc021775.1_g010.1; Cse_sc024337.1_g010.1; Cse_sc025595.1_g010.1
GO:0071944	cell periphery	cellular_component	9	6179	17	55481	2.70E-06	3.13E-05	4.753567587	Cse_sc000429.1_g040.1; Cse_sc001388.1_g070.1; Cse_sc002593.1_g050.1; Cse_sc005814.1_g070.1; Cse_sc007082.1_g040.1; Cse_sc013645.1_g020.1; Cse_sc015981.1_g010.1; Cse_sc026191.1_g020.1; Cse_sc066455.1_g010.1
GO:0005775	vacuolar lumen	cellular_component	7	6179	11	55481	2.85E-06	3.29E-05	5.713884271	Cse_sc003450.1_g040.1; Cse_sc009525.1_g010.1; Cse_sc011149.1_g020.1; Cse_sc018597.1_g010.1; Cse_sc025351.1_g020.1; Cse_sc030052.1_g010.1; Cse_sc038162.1_g030.1
GO:0005901	caveola	cellular_component	7	6179	11	55481	2.85E-06	3.29E-05	5.713884271	Cse_sc019830.1_g030.1; Cse_sc019830.1_g050.1; Cse_sc023049.1_g010.1; Cse_sc029976.1_g020.1; Cse_sc048148.1_g020.1; Cse_sc048867.1_g020.1; Cse_sc302601.1_g010.1
GO:0006814	sodium ion transport	biological_process	18	6179	54	55481	2.86E-06	3.30E-05	2.992986999	Cse_sc000401.1_g060.1; Cse_sc002424.1_g020.1; Cse_sc002846.1_g050.1; Cse_sc002846.1_g060.1; Cse_sc002846.1_g080.1; Cse_sc007344.1_g030.1; Cse_sc010870.1_g060.1; Cse_sc014799.1_g030.1; Cse_sc015225.1_g010.1; Cse_sc033911.1_g020.1; Cse_sc038823.1_g020.1; Cse_sc039152.1_g010.1; Cse_sc040734.1_g010.1; Cse_sc054521.1_g010.1; Cse_sc056639.1_g010.1; Cse_sc068535.1_g010.1; Cse_sc084893.1_g010.1; Cse_sc11…
GO:0008970	phospholipase A1 activity	molecular_function	12	6179	28	55481	2.95E-06	3.39E-05	3.848126142	Cse_sc002278.1_g010.1; Cse_sc007364.1_g040.1; Cse_sc010384.1_g080.1; Cse_sc012947.1_g010.1; Cse_sc014872.1_g010.1; Cse_sc020866.1_g030.1; Cse_sc022020.1_g020.1; Cse_sc022347.1_g020.1; Cse_sc029495.1_g030.1; Cse_sc030971.1_g010.1; Cse_sc031779.1_g010.1; Cse_sc035831.1_g050.1
GO:0000139	Golgi membrane	cellular_component	134	6179	825	55481	3.40E-06	3.90E-05	1.458400938	Cse_sc000006.1_g210.1; Cse_sc000080.1_g080.1; Cse_sc000139.1_g090.1; Cse_sc000170.1_g100.1; Cse_sc000203.1_g140.1; Cse_sc000224.1_g020.1; Cse_sc000228.1_g040.1; Cse_sc000243.1_g040.1; Cse_sc000286.1_g040.1; Cse_sc000412.1_g050.1; Cse_sc000430.1_g010.1; Cse_sc000528.1_g070.1; Cse_sc000564.1_g020.1; Cse_sc000623.1_g100.1; Cse_sc000653.1_g060.1; Cse_sc000666.1_g020.1; Cse_sc000758.1_g020.1; Cse_sc00…
GO:0030244	cellulose biosynthetic process	biological_process	32	6179	129	55481	3.58E-06	4.09E-05	2.227339162	Cse_sc000412.1_g050.1; Cse_sc000605.1_g090.1; Cse_sc000758.1_g020.1; Cse_sc000926.1_g040.1; Cse_sc000989.1_g040.1; Cse_sc001000.1_g030.1; Cse_sc001000.1_g060.1; Cse_sc001643.1_g010.1; Cse_sc001753.1_g020.1; Cse_sc003001.1_g090.1; Cse_sc003766.1_g010.1; Cse_sc004004.1_g050.1; Cse_sc004708.1_g050.1; Cse_sc007946.1_g040.1; Cse_sc010977.1_g040.1; Cse_sc011610.1_g020.1; Cse_sc014044.1_g020.1; Cse_sc01…
GO:0016759	cellulose synthase activity	molecular_function	22	6179	75	55481	4.08E-06	4.65E-05	2.633828559	Cse_sc000412.1_g050.1; Cse_sc000605.1_g090.1; Cse_sc000758.1_g020.1; Cse_sc000926.1_g040.1; Cse_sc001000.1_g030.1; Cse_sc001000.1_g060.1; Cse_sc003001.1_g090.1; Cse_sc004004.1_g050.1; Cse_sc004708.1_g050.1; Cse_sc007946.1_g040.1; Cse_sc011610.1_g020.1; Cse_sc018368.1_g030.1; Cse_sc020012.1_g050.1; Cse_sc022462.1_g020.1; Cse_sc023627.1_g040.1; Cse_sc023627.1_g060.1; Cse_sc027218.1_g020.1; Cse_sc02…
GO:0051017	actin filament bundle assembly	biological_process	14	6179	37	55481	4.18E-06	4.75E-05	3.397444702	Cse_sc001783.1_g110.1; Cse_sc002679.1_g040.1; Cse_sc002945.1_g030.1; Cse_sc003227.1_g040.1; Cse_sc005651.1_g040.1; Cse_sc005740.1_g020.1; Cse_sc006082.1_g020.1; Cse_sc006780.1_g020.1; Cse_sc007067.1_g040.1; Cse_sc012462.1_g030.1; Cse_sc014682.1_g030.1; Cse_sc027349.1_g020.1; Cse_sc041218.1_g010.1; Cse_sc055663.1_g010.1
GO:0016099	monoterpenoid biosynthetic process	biological_process	13	6179	33	55481	4.61E-06	5.22E-05	3.537166453	Cse_sc000439.1_g050.1; Cse_sc001298.1_g140.1; Cse_sc002380.1_g010.1; Cse_sc013631.1_g020.1; Cse_sc016802.1_g020.1; Cse_sc019316.1_g010.1; Cse_sc024679.1_g020.1; Cse_sc025065.1_g020.1; Cse_sc026306.1_g010.1; Cse_sc028594.1_g020.1; Cse_sc029115.1_g020.1; Cse_sc031107.1_g010.1; Cse_sc035367.1_g010.1
GO:0043068	positive regulation of programmed cell death	biological_process	11	6179	25	55481	4.62E-06	5.22E-05	3.950742839	Cse_sc000732.1_g040.1; Cse_sc000805.1_g060.1; Cse_sc001855.1_g070.1; Cse_sc003163.1_g070.1; Cse_sc010808.1_g030.1; Cse_sc010916.1_g020.1; Cse_sc012168.1_g030.1; Cse_sc015363.1_g030.1; Cse_sc015834.1_g030.1; Cse_sc027359.1_g010.1; Cse_sc030309.1_g010.1
GO:0048316	seed development	biological_process	30	6179	119	55481	4.65E-06	5.23E-05	2.263603613	Cse_sc000282.1_g100.1; Cse_sc000547.1_g030.1; Cse_sc001347.1_g020.1; Cse_sc002688.1_g080.1; Cse_sc003027.1_g030.1; Cse_sc003952.1_g040.1; Cse_sc004509.1_g020.1; Cse_sc005102.1_g020.1; Cse_sc005874.1_g020.1; Cse_sc006145.1_g030.1; Cse_sc006546.1_g020.1; Cse_sc006852.1_g030.1; Cse_sc006886.1_g010.1; Cse_sc009189.1_g040.1; Cse_sc012729.1_g020.1; Cse_sc013293.1_g020.1; Cse_sc014813.1_g020.1; Cse_sc01…
GO:0006820	anion transport	biological_process	9	6179	18	55481	5.46E-06	6.13E-05	4.489480498	Cse_sc000586.1_g080.1; Cse_sc001506.1_g010.1; Cse_sc004756.1_g030.1; Cse_sc007802.1_g010.1; Cse_sc010878.1_g050.1; Cse_sc020082.1_g010.1; Cse_sc028041.1_g040.1; Cse_sc029845.1_g020.1; Cse_sc037427.1_g010.1
GO:0016125	sterol metabolic process	biological_process	16	6179	47	55481	6.15E-06	6.89E-05	3.056667573	Cse_sc000420.1_g200.1; Cse_sc001235.1_g010.1; Cse_sc001326.1_g060.1; Cse_sc001347.1_g020.1; Cse_sc001820.1_g080.1; Cse_sc002663.1_g070.1; Cse_sc003952.1_g040.1; Cse_sc006089.1_g020.1; Cse_sc007661.1_g020.1; Cse_sc009551.1_g010.1; Cse_sc012043.1_g010.1; Cse_sc012197.1_g010.1; Cse_sc012645.1_g050.1; Cse_sc016526.1_g010.1; Cse_sc020754.1_g020.1; Cse_sc025826.1_g020.1
GO:0015204	urea transmembrane transporter activity	molecular_function	6	6179	9	55481	6.22E-06	6.92E-05	5.985973998	Cse_sc000162.1_g060.1; Cse_sc000215.1_g010.1; Cse_sc003348.1_g020.1; Cse_sc006766.1_g110.1; Cse_sc010612.1_g020.1; Cse_sc012068.1_g040.1
GO:0080155	regulation of double fertilization forming a zygote and endosperm	biological_process	6	6179	9	55481	6.22E-06	6.92E-05	5.985973998	Cse_sc001468.1_g030.1; Cse_sc001812.1_g070.1; Cse_sc005759.1_g020.1; Cse_sc006852.1_g030.1; Cse_sc019077.1_g010.1; Cse_sc056513.1_g020.1
GO:0004683	calmodulin-dependent protein kinase activity	molecular_function	22	6179	77	55481	6.69E-06	7.43E-05	2.565417428	Cse_sc000443.1_g070.1; Cse_sc000644.1_g030.1; Cse_sc004694.1_g030.1; Cse_sc005465.1_g070.1; Cse_sc007901.1_g100.1; Cse_sc009085.1_g050.1; Cse_sc009095.1_g070.1; Cse_sc010271.1_g010.1; Cse_sc010729.1_g040.1; Cse_sc012588.1_g030.1; Cse_sc014683.1_g020.1; Cse_sc014963.1_g010.1; Cse_sc015876.1_g030.1; Cse_sc017327.1_g010.1; Cse_sc019609.1_g020.1; Cse_sc024498.1_g030.1; Cse_sc029395.1_g010.1; Cse_sc03…
GO:0120029	proton export across plasma membrane	biological_process	17	6179	52	55481	6.77E-06	7.50E-05	2.935429557	Cse_sc000741.1_g050.1; Cse_sc001244.1_g090.1; Cse_sc001754.1_g060.1; Cse_sc001989.1_g050.1; Cse_sc002740.1_g080.1; Cse_sc005465.1_g020.1; Cse_sc009967.1_g010.1; Cse_sc015063.1_g040.1; Cse_sc021397.1_g010.1; Cse_sc022821.1_g010.1; Cse_sc028602.1_g020.1; Cse_sc029373.1_g010.1; Cse_sc085423.1_g010.1; Cse_sc092998.1_g010.1; Cse_sc126677.1_g010.1; Cse_sc202023.1_g010.1; Cse_sc219855.1_g010.1
GO:1902183	regulation of shoot apical meristem development	biological_process	8	6179	15	55481	6.98E-06	7.63E-05	4.788779198	Cse_sc000244.1_g130.1; Cse_sc002278.1_g030.1; Cse_sc003577.1_g050.1; Cse_sc006528.1_g010.1; Cse_sc007271.1_g010.1; Cse_sc011972.1_g050.1; Cse_sc023298.1_g020.1; Cse_sc029081.1_g010.1
GO:0009904	chloroplast accumulation movement	biological_process	8	6179	15	55481	6.98E-06	7.63E-05	4.788779198	Cse_sc000412.1_g060.1; Cse_sc000623.1_g090.1; Cse_sc001024.1_g020.1; Cse_sc003597.1_g090.1; Cse_sc003796.1_g060.1; Cse_sc005216.1_g020.1; Cse_sc016183.1_g010.1; Cse_sc019333.1_g010.1
GO:0017057	6-phosphogluconolactonase activity	molecular_function	8	6179	15	55481	6.98E-06	7.63E-05	4.788779198	Cse_sc001499.1_g040.1; Cse_sc001499.1_g080.1; Cse_sc002174.1_g010.1; Cse_sc008628.1_g030.1; Cse_sc008628.1_g040.1; Cse_sc019790.1_g030.1; Cse_sc022655.1_g040.1; Cse_sc026715.1_g040.1
GO:0009828	plant-type cell wall loosening	biological_process	8	6179	15	55481	6.98E-06	7.63E-05	4.788779198	Cse_sc005565.1_g020.1; Cse_sc005814.1_g070.1; Cse_sc007082.1_g040.1; Cse_sc015981.1_g010.1; Cse_sc020475.1_g020.1; Cse_sc023018.1_g010.1; Cse_sc027867.1_g020.1; Cse_sc066455.1_g010.1
GO:0010047	fruit dehiscence	biological_process	8	6179	15	55481	6.98E-06	7.63E-05	4.788779198	Cse_sc005565.1_g020.1; Cse_sc005814.1_g070.1; Cse_sc007082.1_g040.1; Cse_sc015981.1_g010.1; Cse_sc019397.1_g040.1; Cse_sc020475.1_g020.1; Cse_sc027006.1_g010.1; Cse_sc066455.1_g010.1
GO:0051119	sugar transmembrane transporter activity	molecular_function	13	6179	34	55481	7.03E-06	7.65E-05	3.433132146	Cse_sc001756.1_g010.1; Cse_sc002120.1_g060.1; Cse_sc004070.1_g030.1; Cse_sc004878.1_g030.1; Cse_sc009205.1_g040.1; Cse_sc009205.1_g050.1; Cse_sc009335.1_g050.1; Cse_sc009340.1_g020.1; Cse_sc016845.1_g020.1; Cse_sc022051.1_g010.1; Cse_sc035429.1_g010.1; Cse_sc036003.1_g030.1; Cse_sc042510.1_g010.1
GO:0050636	vinorine synthase activity	molecular_function	11	6179	26	55481	7.71E-06	8.37E-05	3.798791191	Cse_sc002842.1_g010.1; Cse_sc004000.1_g030.1; Cse_sc008113.1_g020.1; Cse_sc008113.1_g050.1; Cse_sc008413.1_g030.1; Cse_sc016705.1_g030.1; Cse_sc017998.1_g020.1; Cse_sc018566.1_g020.1; Cse_sc019998.1_g020.1; Cse_sc021316.1_g010.1; Cse_sc024145.1_g010.1
GO:0009735	response to cytokinin	biological_process	48	6179	232	55481	7.90E-06	8.56E-05	1.857716068	Cse_sc000076.1_g020.1; Cse_sc000461.1_g040.1; Cse_sc001388.1_g060.1; Cse_sc001482.1_g030.1; Cse_sc001808.1_g040.1; Cse_sc003321.1_g010.1; Cse_sc003578.1_g030.1; Cse_sc003982.1_g020.1; Cse_sc004141.1_g040.1; Cse_sc004306.1_g020.1; Cse_sc005071.1_g020.1; Cse_sc005287.1_g030.1; Cse_sc005648.1_g050.1; Cse_sc006446.1_g050.1; Cse_sc007262.1_g030.1; Cse_sc007911.1_g010.1; Cse_sc008501.1_g030.1; Cse_sc00…
GO:0035673	oligopeptide transmembrane transporter activity	molecular_function	34	6179	146	55481	8.86E-06	9.58E-05	2.090990917	Cse_sc000002.1_g140.1; Cse_sc000006.1_g190.1; Cse_sc000116.1_g090.1; Cse_sc000871.1_g050.1; Cse_sc001555.1_g070.1; Cse_sc002003.1_g050.1; Cse_sc003400.1_g010.1; Cse_sc003410.1_g020.1; Cse_sc004108.1_g030.1; Cse_sc004419.1_g020.1; Cse_sc004892.1_g080.1; Cse_sc005040.1_g040.1; Cse_sc005679.1_g010.1; Cse_sc005725.1_g020.1; Cse_sc006036.1_g010.1; Cse_sc006791.1_g060.1; Cse_sc007258.1_g030.1; Cse_sc00…
GO:0016747	transferase activity, transferring acyl groups other than amino-acyl groups	molecular_function	26	6179	100	55481	9.12E-06	9.83E-05	2.334529859	Cse_sc000282.1_g110.1; Cse_sc002347.1_g010.1; Cse_sc004180.1_g020.1; Cse_sc004592.1_g010.1; Cse_sc004592.1_g040.1; Cse_sc006101.1_g060.1; Cse_sc006152.1_g040.1; Cse_sc007530.1_g050.1; Cse_sc008024.1_g030.1; Cse_sc010294.1_g040.1; Cse_sc010552.1_g010.1; Cse_sc011169.1_g030.1; Cse_sc011484.1_g010.1; Cse_sc011899.1_g030.1; Cse_sc014322.1_g020.1; Cse_sc014600.1_g010.1; Cse_sc015105.1_g050.1; Cse_sc01…
GO:0009627	systemic acquired resistance	biological_process	20	6179	68	55481	9.35E-06	0.000100469	2.640870881	Cse_sc000012.1_g060.1; Cse_sc000149.1_g050.1; Cse_sc000149.1_g070.1; Cse_sc000289.1_g040.1; Cse_sc000403.1_g010.1; Cse_sc000477.1_g130.1; Cse_sc001278.1_g040.1; Cse_sc001348.1_g030.1; Cse_sc003595.1_g070.1; Cse_sc006615.1_g020.1; Cse_sc006882.1_g040.1; Cse_sc007850.1_g020.1; Cse_sc008134.1_g050.1; Cse_sc009061.1_g030.1; Cse_sc010077.1_g020.1; Cse_sc010661.1_g040.1; Cse_sc014155.1_g010.1; Cse_sc01…
GO:0048235	pollen sperm cell differentiation	biological_process	15	6179	44	55481	1.06E-05	0.00011346	3.061009431	Cse_sc000162.1_g060.1; Cse_sc000266.1_g030.1; Cse_sc000732.1_g040.1; Cse_sc002191.1_g020.1; Cse_sc003135.1_g050.1; Cse_sc004053.1_g050.1; Cse_sc005264.1_g020.1; Cse_sc007444.1_g020.1; Cse_sc011400.1_g010.1; Cse_sc021053.1_g030.1; Cse_sc021766.1_g010.1; Cse_sc028160.1_g010.1; Cse_sc039178.1_g030.1; Cse_sc045487.1_g010.1; Cse_sc074162.1_g010.1
GO:0009506	plasmodesma	cellular_component	271	6179	1905	55481	1.06E-05	0.00011346	1.277322011	Cse_sc000001.1_g170.1; Cse_sc000037.1_g080.1; Cse_sc000082.1_g170.1; Cse_sc000138.1_g100.1; Cse_sc000155.1_g010.1; Cse_sc000206.1_g160.1; Cse_sc000276.1_g070.1; Cse_sc000296.1_g050.1; Cse_sc000302.1_g030.1; Cse_sc000395.1_g030.1; Cse_sc000409.1_g080.1; Cse_sc000456.1_g090.1; Cse_sc000515.1_g040.1; Cse_sc000541.1_g080.1; Cse_sc000552.1_g040.1; Cse_sc000659.1_g060.1; Cse_sc000788.1_g050.1; Cse_sc00…
GO:0010105	negative regulation of ethylene-activated signaling pathway	biological_process	16	6179	49	55481	1.17E-05	0.000124616	2.931905632	Cse_sc000244.1_g100.1; Cse_sc000608.1_g040.1; Cse_sc000758.1_g040.1; Cse_sc002283.1_g040.1; Cse_sc002577.1_g070.1; Cse_sc009413.1_g020.1; Cse_sc009495.1_g030.1; Cse_sc012486.1_g010.1; Cse_sc014505.1_g010.1; Cse_sc018079.1_g020.1; Cse_sc019061.1_g030.1; Cse_sc019552.1_g020.1; Cse_sc024695.1_g010.1; Cse_sc028766.1_g020.1; Cse_sc031115.1_g020.1; Cse_sc036624.1_g010.1
GO:0000079	regulation of cyclin-dependent protein serine/threonine kinase activity	biological_process	16	6179	49	55481	1.17E-05	0.000124616	2.931905632	Cse_sc000321.1_g080.1; Cse_sc002571.1_g070.1; Cse_sc003509.1_g050.1; Cse_sc003573.1_g020.1; Cse_sc003799.1_g080.1; Cse_sc004509.1_g020.1; Cse_sc009189.1_g040.1; Cse_sc009402.1_g020.1; Cse_sc010690.1_g020.1; Cse_sc012159.1_g020.1; Cse_sc012525.1_g030.1; Cse_sc014205.1_g020.1; Cse_sc014813.1_g020.1; Cse_sc023980.1_g020.1; Cse_sc028098.1_g020.1; Cse_sc035235.1_g010.1
GO:1902457	negative regulation of stomatal opening	biological_process	5	6179	7	55481	1.21E-05	0.000127891	6.413543569	Cse_sc000067.1_g030.1; Cse_sc000615.1_g030.1; Cse_sc001011.1_g060.1; Cse_sc019439.1_g010.1; Cse_sc019439.1_g030.1
GO:0016491	oxidoreductase activity	molecular_function	97	6179	574	55481	1.25E-05	0.000132421	1.517350552	Cse_sc000044.1_g030.1; Cse_sc000221.1_g140.1; Cse_sc000283.1_g050.1; Cse_sc000311.1_g040.1; Cse_sc000531.1_g180.1; Cse_sc000576.1_g080.1; Cse_sc000827.1_g090.1; Cse_sc000876.1_g050.1; Cse_sc001071.1_g030.1; Cse_sc001197.1_g060.1; Cse_sc001494.1_g030.1; Cse_sc001627.1_g010.1; Cse_sc001806.1_g070.1; Cse_sc001806.1_g090.1; Cse_sc001919.1_g050.1; Cse_sc002478.1_g020.1; Cse_sc002556.1_g020.1; Cse_sc00…
GO:0102797	geranial:oxygen oxidoreductase activity	molecular_function	14	6179	40	55481	1.30E-05	0.00013629	3.142636349	Cse_sc000245.1_g030.1; Cse_sc001229.1_g020.1; Cse_sc004557.1_g010.1; Cse_sc006394.1_g030.1; Cse_sc010321.1_g030.1; Cse_sc011082.1_g020.1; Cse_sc011082.1_g050.1; Cse_sc011641.1_g010.1; Cse_sc013386.1_g010.1; Cse_sc013707.1_g010.1; Cse_sc017824.1_g040.1; Cse_sc020707.1_g020.1; Cse_sc029438.1_g010.1; Cse_sc202944.1_g010.1
GO:0102798	heptaldehyde:oxygen oxidoreductase activity	molecular_function	14	6179	40	55481	1.30E-05	0.00013629	3.142636349	Cse_sc000245.1_g030.1; Cse_sc001229.1_g020.1; Cse_sc004557.1_g010.1; Cse_sc006394.1_g030.1; Cse_sc010321.1_g030.1; Cse_sc011082.1_g020.1; Cse_sc011082.1_g050.1; Cse_sc011641.1_g010.1; Cse_sc013386.1_g010.1; Cse_sc013707.1_g010.1; Cse_sc017824.1_g040.1; Cse_sc020707.1_g020.1; Cse_sc029438.1_g010.1; Cse_sc202944.1_g010.1
GO:0008289	lipid binding	molecular_function	52	6179	263	55481	1.42E-05	0.000149183	1.775307878	Cse_sc000012.1_g170.1; Cse_sc000071.1_g040.1; Cse_sc000352.1_g030.1; Cse_sc000617.1_g130.1; Cse_sc000644.1_g060.1; Cse_sc000682.1_g070.1; Cse_sc001074.1_g030.1; Cse_sc001205.1_g010.1; Cse_sc001205.1_g020.1; Cse_sc001205.1_g060.1; Cse_sc001274.1_g030.1; Cse_sc001414.1_g020.1; Cse_sc001555.1_g050.1; Cse_sc001849.1_g020.1; Cse_sc001966.1_g010.1; Cse_sc001966.1_g030.1; Cse_sc002402.1_g050.1; Cse_sc00…
GO:0051015	actin filament binding	molecular_function	27	6179	108	55481	1.45E-05	0.000151273	2.244740249	Cse_sc000804.1_g010.1; Cse_sc001783.1_g110.1; Cse_sc001929.1_g020.1; Cse_sc002679.1_g040.1; Cse_sc002717.1_g020.1; Cse_sc002945.1_g030.1; Cse_sc003084.1_g040.1; Cse_sc003227.1_g040.1; Cse_sc005375.1_g050.1; Cse_sc005651.1_g040.1; Cse_sc005740.1_g020.1; Cse_sc006082.1_g020.1; Cse_sc006780.1_g020.1; Cse_sc007067.1_g040.1; Cse_sc010438.1_g020.1; Cse_sc012462.1_g030.1; Cse_sc014682.1_g030.1; Cse_sc01…
GO:0045493	xylan catabolic process	biological_process	15	6179	45	55481	1.48E-05	0.000154161	2.992986999	Cse_sc000505.1_g030.1; Cse_sc001440.1_g030.1; Cse_sc003798.1_g110.1; Cse_sc004786.1_g050.1; Cse_sc006195.1_g020.1; Cse_sc006904.1_g060.1; Cse_sc007556.1_g050.1; Cse_sc012511.1_g020.1; Cse_sc014837.1_g030.1; Cse_sc014972.1_g010.1; Cse_sc016724.1_g030.1; Cse_sc019970.1_g010.1; Cse_sc035777.1_g020.1; Cse_sc039163.1_g010.1; Cse_sc065557.1_g010.1
GO:0006970	response to osmotic stress	biological_process	56	6179	290	55481	1.50E-05	0.000156048	1.73386833	Cse_sc000067.1_g030.1; Cse_sc000082.1_g020.1; Cse_sc000392.1_g020.1; Cse_sc000605.1_g090.1; Cse_sc000615.1_g030.1; Cse_sc000868.1_g040.1; Cse_sc000868.1_g060.1; Cse_sc001011.1_g060.1; Cse_sc001181.1_g010.1; Cse_sc001609.1_g030.1; Cse_sc001738.1_g080.1; Cse_sc002688.1_g080.1; Cse_sc002691.1_g020.1; Cse_sc002691.1_g030.1; Cse_sc002883.1_g040.1; Cse_sc003214.1_g050.1; Cse_sc003505.1_g040.1; Cse_sc00…
GO:0080133	midchain alkane hydroxylase activity	molecular_function	13	6179	36	55481	1.54E-05	0.000160271	3.242402582	Cse_sc000668.1_g030.1; Cse_sc001198.1_g020.1; Cse_sc002755.1_g010.1; Cse_sc002755.1_g040.1; Cse_sc002755.1_g080.1; Cse_sc009584.1_g010.1; Cse_sc009584.1_g020.1; Cse_sc018410.1_g010.1; Cse_sc020721.1_g020.1; Cse_sc029824.1_g010.1; Cse_sc034595.1_g010.1; Cse_sc060136.1_g010.1; Cse_sc213550.1_g010.1
GO:0009931	calcium-dependent protein serine/threonine kinase activity	molecular_function	22	6179	81	55481	1.68E-05	0.000174353	2.438730147	Cse_sc000443.1_g070.1; Cse_sc000644.1_g030.1; Cse_sc004694.1_g030.1; Cse_sc005465.1_g070.1; Cse_sc006912.1_g020.1; Cse_sc007901.1_g100.1; Cse_sc009085.1_g050.1; Cse_sc009095.1_g070.1; Cse_sc010271.1_g010.1; Cse_sc010729.1_g040.1; Cse_sc012588.1_g030.1; Cse_sc014683.1_g020.1; Cse_sc015876.1_g030.1; Cse_sc017327.1_g010.1; Cse_sc019609.1_g020.1; Cse_sc024498.1_g030.1; Cse_sc029395.1_g010.1; Cse_sc03…
GO:0090626	plant epidermis morphogenesis	biological_process	4	6179	5	55481	1.71E-05	0.000175408	7.183168798	Cse_sc001758.1_g060.1; Cse_sc002347.1_g010.1; Cse_sc004180.1_g020.1; Cse_sc007530.1_g050.1
GO:0004020	adenylylsulfate kinase activity	molecular_function	4	6179	5	55481	1.71E-05	0.000175408	7.183168798	Cse_sc005123.1_g020.1; Cse_sc019703.1_g030.1; Cse_sc025183.1_g020.1; Cse_sc029645.1_g020.1
GO:0070814	hydrogen sulfide biosynthetic process	biological_process	4	6179	5	55481	1.71E-05	0.000175408	7.183168798	Cse_sc005123.1_g020.1; Cse_sc019703.1_g030.1; Cse_sc025183.1_g020.1; Cse_sc029645.1_g020.1
GO:0010450	inflorescence meristem growth	biological_process	4	6179	5	55481	1.71E-05	0.000175408	7.183168798	Cse_sc006528.1_g010.1; Cse_sc011972.1_g050.1; Cse_sc023298.1_g020.1; Cse_sc029081.1_g010.1
GO:0009660	amyloplast organization	biological_process	7	6179	13	55481	1.81E-05	0.000183676	4.834825152	Cse_sc002278.1_g010.1; Cse_sc020866.1_g030.1; Cse_sc023342.1_g010.1; Cse_sc029495.1_g030.1; Cse_sc037705.1_g010.1; Cse_sc108954.1_g010.1; Cse_sc141285.1_g010.1
GO:0051300	spindle pole body organization	biological_process	7	6179	13	55481	1.81E-05	0.000183676	4.834825152	Cse_sc002586.1_g030.1; Cse_sc006229.1_g030.1; Cse_sc022176.1_g010.1; Cse_sc022290.1_g030.1; Cse_sc022722.1_g050.1; Cse_sc024916.1_g010.1; Cse_sc052102.1_g020.1
GO:0017022	myosin binding	molecular_function	7	6179	13	55481	1.81E-05	0.000183676	4.834825152	Cse_sc003751.1_g020.1; Cse_sc013874.1_g020.1; Cse_sc015850.1_g050.1; Cse_sc024498.1_g050.1; Cse_sc031748.1_g020.1; Cse_sc036095.1_g040.1; Cse_sc038580.1_g030.1
GO:0016614	oxidoreductase activity, acting on CH-OH group of donors	molecular_function	14	6179	41	55481	1.83E-05	0.000185474	3.065986682	Cse_sc000208.1_g100.1; Cse_sc001318.1_g120.1; Cse_sc002266.1_g010.1; Cse_sc008109.1_g020.1; Cse_sc008242.1_g030.1; Cse_sc008800.1_g010.1; Cse_sc012540.1_g040.1; Cse_sc014643.1_g010.1; Cse_sc016063.1_g050.1; Cse_sc016749.1_g040.1; Cse_sc018918.1_g020.1; Cse_sc019442.1_g020.1; Cse_sc019896.1_g020.1; Cse_sc026263.1_g020.1
GO:0046593	mandelonitrile lyase activity	molecular_function	14	6179	41	55481	1.83E-05	0.000185474	3.065986682	Cse_sc000208.1_g100.1; Cse_sc001318.1_g120.1; Cse_sc002266.1_g010.1; Cse_sc008109.1_g020.1; Cse_sc008242.1_g030.1; Cse_sc008800.1_g010.1; Cse_sc012540.1_g040.1; Cse_sc014643.1_g010.1; Cse_sc016063.1_g050.1; Cse_sc016749.1_g040.1; Cse_sc018918.1_g020.1; Cse_sc019442.1_g020.1; Cse_sc019896.1_g020.1; Cse_sc026263.1_g020.1
GO:0004366	glycerol-3-phosphate O-acyltransferase activity	molecular_function	9	6179	20	55481	1.87E-05	0.000187479	4.040532449	Cse_sc001304.1_g010.1; Cse_sc004643.1_g030.1; Cse_sc007477.1_g020.1; Cse_sc007625.1_g010.1; Cse_sc008323.1_g010.1; Cse_sc010368.1_g040.1; Cse_sc021053.1_g030.1; Cse_sc025295.1_g020.1; Cse_sc037009.1_g010.1
GO:0102420	sn-1-glycerol-3-phosphate C16:0-DCA-CoA acyl transferase activity	molecular_function	9	6179	20	55481	1.87E-05	0.000187479	4.040532449	Cse_sc001304.1_g010.1; Cse_sc004643.1_g030.1; Cse_sc007477.1_g020.1; Cse_sc007625.1_g010.1; Cse_sc008323.1_g010.1; Cse_sc010368.1_g040.1; Cse_sc021053.1_g030.1; Cse_sc025295.1_g020.1; Cse_sc037009.1_g010.1
GO:0005199	structural constituent of cell wall	molecular_function	6	6179	10	55481	1.87E-05	0.000187479	5.387376598	Cse_sc001506.1_g100.1; Cse_sc005377.1_g040.1; Cse_sc006893.1_g020.1; Cse_sc015487.1_g020.1; Cse_sc020087.1_g050.1; Cse_sc020443.1_g010.1
GO:0071669	plant-type cell wall organization or biogenesis	biological_process	6	6179	10	55481	1.87E-05	0.000187479	5.387376598	Cse_sc004736.1_g010.1; Cse_sc004736.1_g020.1; Cse_sc005778.1_g030.1; Cse_sc006158.1_g050.1; Cse_sc010977.1_g040.1; Cse_sc012398.1_g040.1
GO:0015086	cadmium ion transmembrane transporter activity	molecular_function	10	6179	24	55481	2.02E-05	0.000201523	3.741233749	Cse_sc000149.1_g050.1; Cse_sc000149.1_g070.1; Cse_sc000403.1_g010.1; Cse_sc000477.1_g130.1; Cse_sc002714.1_g010.1; Cse_sc003276.1_g040.1; Cse_sc003595.1_g070.1; Cse_sc016149.1_g010.1; Cse_sc026717.1_g010.1; Cse_sc039398.1_g010.1
GO:0016791	phosphatase activity	molecular_function	16	6179	51	55481	2.14E-05	0.000213402	2.81692894	Cse_sc000389.1_g020.1; Cse_sc001304.1_g010.1; Cse_sc004382.1_g020.1; Cse_sc004643.1_g030.1; Cse_sc007477.1_g020.1; Cse_sc007625.1_g010.1; Cse_sc008323.1_g010.1; Cse_sc008955.1_g020.1; Cse_sc009724.1_g020.1; Cse_sc010368.1_g040.1; Cse_sc015702.1_g010.1; Cse_sc021053.1_g030.1; Cse_sc025295.1_g020.1; Cse_sc037009.1_g010.1; Cse_sc042616.1_g020.1; Cse_sc053954.1_g030.1
GO:0016762	xyloglucan:xyloglucosyl transferase activity	molecular_function	17	6179	56	55481	2.17E-05	0.000216125	2.725756017	Cse_sc000566.1_g070.1; Cse_sc000651.1_g030.1; Cse_sc000651.1_g090.1; Cse_sc000651.1_g110.1; Cse_sc000726.1_g040.1; Cse_sc001519.1_g040.1; Cse_sc002506.1_g020.1; Cse_sc003175.1_g020.1; Cse_sc003820.1_g090.1; Cse_sc006887.1_g030.1; Cse_sc013547.1_g020.1; Cse_sc017824.1_g020.1; Cse_sc019365.1_g050.1; Cse_sc021751.1_g020.1; Cse_sc026496.1_g030.1; Cse_sc033544.1_g010.1; Cse_sc039244.1_g020.1
GO:2000280	regulation of root development	biological_process	13	6179	37	55481	2.23E-05	0.000221058	3.15477008	Cse_sc001556.1_g020.1; Cse_sc005225.1_g020.1; Cse_sc005969.1_g010.1; Cse_sc008007.1_g050.1; Cse_sc015112.1_g020.1; Cse_sc017707.1_g040.1; Cse_sc020491.1_g040.1; Cse_sc030580.1_g020.1; Cse_sc032611.1_g020.1; Cse_sc033112.1_g010.1; Cse_sc038290.1_g020.1; Cse_sc073221.1_g010.1; Cse_sc113053.1_g010.1
GO:0030154	cell differentiation	biological_process	64	6179	349	55481	2.39E-05	0.000236993	1.646571644	Cse_sc000001.1_g250.1; Cse_sc000095.1_g140.1; Cse_sc000208.1_g060.1; Cse_sc000244.1_g130.1; Cse_sc000324.1_g040.1; Cse_sc000374.1_g030.1; Cse_sc000392.1_g020.1; Cse_sc000732.1_g040.1; Cse_sc001023.1_g030.1; Cse_sc001389.1_g080.1; Cse_sc001707.1_g050.1; Cse_sc002106.1_g040.1; Cse_sc002278.1_g030.1; Cse_sc002465.1_g020.1; Cse_sc002977.1_g040.1; Cse_sc003896.1_g030.1; Cse_sc003924.1_g030.1; Cse_sc00…
GO:0045893	positive regulation of transcription, DNA-templated	biological_process	90	6179	534	55481	2.68E-05	0.000264676	1.513308033	Cse_sc000044.1_g080.1; Cse_sc000076.1_g020.1; Cse_sc000118.1_g010.1; Cse_sc000187.1_g020.1; Cse_sc000380.1_g060.1; Cse_sc000389.1_g050.1; Cse_sc000626.1_g010.1; Cse_sc000732.1_g040.1; Cse_sc001164.1_g040.1; Cse_sc001457.1_g090.1; Cse_sc001552.1_g070.1; Cse_sc001935.1_g030.1; Cse_sc002465.1_g020.1; Cse_sc002591.1_g010.1; Cse_sc002986.1_g020.1; Cse_sc003421.1_g010.1; Cse_sc003530.1_g020.1; Cse_sc00…
GO:0009903	chloroplast avoidance movement	biological_process	8	6179	17	55481	2.75E-05	0.000270948	4.22539341	Cse_sc000412.1_g060.1; Cse_sc000623.1_g090.1; Cse_sc001024.1_g020.1; Cse_sc003597.1_g090.1; Cse_sc003796.1_g060.1; Cse_sc005216.1_g020.1; Cse_sc016183.1_g010.1; Cse_sc019333.1_g010.1
GO:0009044	xylan 1,4-beta-xylosidase activity	molecular_function	11	6179	29	55481	3.00E-05	0.000294321	3.405812792	Cse_sc000505.1_g030.1; Cse_sc001440.1_g030.1; Cse_sc003798.1_g110.1; Cse_sc006195.1_g020.1; Cse_sc007556.1_g050.1; Cse_sc012511.1_g020.1; Cse_sc014837.1_g030.1; Cse_sc019970.1_g010.1; Cse_sc035777.1_g020.1; Cse_sc039163.1_g010.1; Cse_sc065557.1_g010.1
GO:0046556	alpha-L-arabinofuranosidase activity	molecular_function	11	6179	29	55481	3.00E-05	0.000294321	3.405812792	Cse_sc000505.1_g030.1; Cse_sc001440.1_g030.1; Cse_sc003798.1_g110.1; Cse_sc006195.1_g020.1; Cse_sc007556.1_g050.1; Cse_sc012511.1_g020.1; Cse_sc014837.1_g030.1; Cse_sc019970.1_g010.1; Cse_sc035777.1_g020.1; Cse_sc039163.1_g010.1; Cse_sc065557.1_g010.1
GO:0015333	peptide:proton symporter activity	molecular_function	28	6179	118	55481	3.06E-05	0.000298051	2.130600915	Cse_sc000002.1_g140.1; Cse_sc000006.1_g190.1; Cse_sc000116.1_g090.1; Cse_sc001555.1_g070.1; Cse_sc003400.1_g010.1; Cse_sc004108.1_g030.1; Cse_sc004892.1_g080.1; Cse_sc005040.1_g040.1; Cse_sc005725.1_g020.1; Cse_sc006036.1_g010.1; Cse_sc006791.1_g060.1; Cse_sc007258.1_g030.1; Cse_sc007730.1_g030.1; Cse_sc010291.1_g020.1; Cse_sc010471.1_g010.1; Cse_sc010793.1_g020.1; Cse_sc010893.1_g030.1; Cse_sc01…
GO:1904680	peptide transmembrane transporter activity	molecular_function	28	6179	118	55481	3.06E-05	0.000298051	2.130600915	Cse_sc000002.1_g140.1; Cse_sc000006.1_g190.1; Cse_sc000116.1_g090.1; Cse_sc001555.1_g070.1; Cse_sc003400.1_g010.1; Cse_sc004108.1_g030.1; Cse_sc004892.1_g080.1; Cse_sc005040.1_g040.1; Cse_sc005725.1_g020.1; Cse_sc006036.1_g010.1; Cse_sc006791.1_g060.1; Cse_sc007258.1_g030.1; Cse_sc007730.1_g030.1; Cse_sc010291.1_g020.1; Cse_sc010471.1_g010.1; Cse_sc010793.1_g020.1; Cse_sc010893.1_g030.1; Cse_sc01…
GO:0015297	antiporter activity	molecular_function	31	6179	136	55481	3.12E-05	0.000303945	2.046674933	Cse_sc000009.1_g010.1; Cse_sc000570.1_g060.1; Cse_sc001414.1_g100.1; Cse_sc004816.1_g040.1; Cse_sc005704.1_g060.1; Cse_sc007000.1_g050.1; Cse_sc007552.1_g020.1; Cse_sc007713.1_g060.1; Cse_sc008626.1_g010.1; Cse_sc008692.1_g020.1; Cse_sc009397.1_g030.1; Cse_sc010870.1_g060.1; Cse_sc011798.1_g010.1; Cse_sc013491.1_g030.1; Cse_sc014484.1_g010.1; Cse_sc014799.1_g030.1; Cse_sc015631.1_g020.1; Cse_sc02…
GO:0004564	beta-fructofuranosidase activity	molecular_function	9	6179	21	55481	3.20E-05	0.000309436	3.848126142	Cse_sc000650.1_g060.1; Cse_sc001983.1_g030.1; Cse_sc002424.1_g050.1; Cse_sc006405.1_g030.1; Cse_sc012813.1_g010.1; Cse_sc024850.1_g020.1; Cse_sc024850.1_g030.1; Cse_sc050486.1_g010.1; Cse_sc058819.1_g010.1
GO:0009567	double fertilization forming a zygote and endosperm	biological_process	9	6179	21	55481	3.20E-05	0.000309436	3.848126142	Cse_sc001468.1_g030.1; Cse_sc001812.1_g070.1; Cse_sc003680.1_g070.1; Cse_sc004961.1_g030.1; Cse_sc005492.1_g030.1; Cse_sc005759.1_g020.1; Cse_sc011400.1_g020.1; Cse_sc019077.1_g010.1; Cse_sc056513.1_g020.1
GO:0005545	1-phosphatidylinositol binding	molecular_function	9	6179	21	55481	3.20E-05	0.000309436	3.848126142	Cse_sc001615.1_g080.1; Cse_sc002518.1_g030.1; Cse_sc008534.1_g030.1; Cse_sc009045.1_g020.1; Cse_sc015342.1_g020.1; Cse_sc020143.1_g020.1; Cse_sc034221.1_g020.1; Cse_sc046981.1_g020.1; Cse_sc050968.1_g020.1
GO:0102483	scopolin beta-glucosidase activity	molecular_function	14	6179	43	55481	3.52E-05	0.000339469	2.92338265	Cse_sc003501.1_g010.1; Cse_sc003850.1_g030.1; Cse_sc004678.1_g060.1; Cse_sc006141.1_g020.1; Cse_sc006636.1_g030.1; Cse_sc006852.1_g010.1; Cse_sc008524.1_g040.1; Cse_sc011220.1_g030.1; Cse_sc013546.1_g020.1; Cse_sc024939.1_g010.1; Cse_sc039672.1_g010.1; Cse_sc041534.1_g020.1; Cse_sc053877.1_g010.1; Cse_sc183293.1_g010.1
GO:0004805	trehalose-phosphatase activity	molecular_function	7	6179	14	55481	3.80E-05	0.000362456	4.489480498	Cse_sc001756.1_g050.1; Cse_sc005458.1_g020.1; Cse_sc011713.1_g070.1; Cse_sc025358.1_g020.1; Cse_sc025621.1_g020.1; Cse_sc031605.1_g030.1; Cse_sc087701.1_g010.1
GO:0016985	mannan endo-1,4-beta-mannosidase activity	molecular_function	7	6179	14	55481	3.80E-05	0.000362456	4.489480498	Cse_sc003021.1_g090.1; Cse_sc005814.1_g070.1; Cse_sc007082.1_g040.1; Cse_sc008368.1_g020.1; Cse_sc009008.1_g010.1; Cse_sc015981.1_g010.1; Cse_sc066455.1_g010.1
GO:0046355	mannan catabolic process	biological_process	7	6179	14	55481	3.80E-05	0.000362456	4.489480498	Cse_sc003021.1_g090.1; Cse_sc005814.1_g070.1; Cse_sc007082.1_g040.1; Cse_sc008368.1_g020.1; Cse_sc009008.1_g010.1; Cse_sc015981.1_g010.1; Cse_sc066455.1_g010.1
GO:0046244	salicylic acid catabolic process	biological_process	7	6179	14	55481	3.80E-05	0.000362456	4.489480498	Cse_sc004633.1_g030.1; Cse_sc005236.1_g020.1; Cse_sc010001.1_g020.1; Cse_sc013502.1_g010.1; Cse_sc023765.1_g020.1; Cse_sc024041.1_g010.1; Cse_sc036647.1_g010.1
GO:0050660	flavin adenine dinucleotide binding	molecular_function	42	6179	207	55481	4.14E-05	0.00039396	1.821818173	Cse_sc000197.1_g020.1; Cse_sc000197.1_g040.1; Cse_sc000208.1_g100.1; Cse_sc000523.1_g080.1; Cse_sc000827.1_g090.1; Cse_sc001318.1_g120.1; Cse_sc001482.1_g030.1; Cse_sc001494.1_g030.1; Cse_sc001516.1_g080.1; Cse_sc001627.1_g010.1; Cse_sc001700.1_g050.1; Cse_sc001777.1_g040.1; Cse_sc002266.1_g010.1; Cse_sc003621.1_g050.1; Cse_sc004244.1_g060.1; Cse_sc006882.1_g040.1; Cse_sc007029.1_g030.1; Cse_sc00…
GO:0042807	central vacuole	cellular_component	5	6179	8	55481	4.36E-05	0.000407591	5.611850623	Cse_sc000215.1_g010.1; Cse_sc003348.1_g020.1; Cse_sc004013.1_g030.1; Cse_sc012068.1_g040.1; Cse_sc029567.1_g020.1
GO:0047751	cholestenone 5-alpha-reductase activity	molecular_function	5	6179	8	55481	4.36E-05	0.000407591	5.611850623	Cse_sc000834.1_g090.1; Cse_sc002006.1_g110.1; Cse_sc005296.1_g020.1; Cse_sc008556.1_g020.1; Cse_sc029934.1_g010.1
GO:0050213	progesterone 5-alpha-reductase activity	molecular_function	5	6179	8	55481	4.36E-05	0.000407591	5.611850623	Cse_sc000834.1_g090.1; Cse_sc002006.1_g110.1; Cse_sc005296.1_g020.1; Cse_sc008556.1_g020.1; Cse_sc029934.1_g010.1
GO:0090377	seed trichome initiation	biological_process	5	6179	8	55481	4.36E-05	0.000407591	5.611850623	Cse_sc000834.1_g090.1; Cse_sc002006.1_g110.1; Cse_sc005296.1_g020.1; Cse_sc008556.1_g020.1; Cse_sc029934.1_g010.1
GO:0004028	3-chloroallyl aldehyde dehydrogenase activity	molecular_function	5	6179	8	55481	4.36E-05	0.000407591	5.611850623	Cse_sc000844.1_g080.1; Cse_sc015187.1_g010.1; Cse_sc015187.1_g020.1; Cse_sc021254.1_g010.1; Cse_sc042098.1_g030.1
GO:0052691	UDP-arabinopyranose mutase activity	molecular_function	5	6179	8	55481	4.36E-05	0.000407591	5.611850623	Cse_sc002862.1_g060.1; Cse_sc003766.1_g010.1; Cse_sc010977.1_g040.1; Cse_sc012398.1_g040.1; Cse_sc012628.1_g020.1
GO:0015145	monosaccharide transmembrane transporter activity	molecular_function	5	6179	8	55481	4.36E-05	0.000407591	5.611850623	Cse_sc009532.1_g020.1; Cse_sc014651.1_g010.1; Cse_sc014651.1_g020.1; Cse_sc014651.1_g030.1; Cse_sc015304.1_g050.1
GO:0009540	zeaxanthin epoxidase [overall] activity	molecular_function	5	6179	8	55481	4.36E-05	0.000407591	5.611850623	Cse_sc020783.1_g020.1; Cse_sc024878.1_g020.1; Cse_sc037641.1_g010.1; Cse_sc041836.1_g010.1; Cse_sc081552.1_g010.1
GO:0000326	protein storage vacuole	cellular_component	11	6179	30	55481	4.50E-05	0.000418225	3.292285699	Cse_sc000215.1_g010.1; Cse_sc000282.1_g100.1; Cse_sc001951.1_g010.1; Cse_sc002932.1_g050.1; Cse_sc003120.1_g030.1; Cse_sc003348.1_g020.1; Cse_sc004013.1_g030.1; Cse_sc008994.1_g060.1; Cse_sc011968.1_g010.1; Cse_sc012068.1_g040.1; Cse_sc013846.1_g040.1
GO:0016132	brassinosteroid biosynthetic process	biological_process	11	6179	30	55481	4.50E-05	0.000418225	3.292285699	Cse_sc000834.1_g090.1; Cse_sc001235.1_g010.1; Cse_sc001820.1_g080.1; Cse_sc002006.1_g110.1; Cse_sc005296.1_g020.1; Cse_sc006089.1_g020.1; Cse_sc008556.1_g020.1; Cse_sc012043.1_g010.1; Cse_sc016526.1_g010.1; Cse_sc025826.1_g020.1; Cse_sc029934.1_g010.1
GO:0090333	regulation of stomatal closure	biological_process	18	6179	64	55481	4.53E-05	0.00042004	2.52533278	Cse_sc000197.1_g060.1; Cse_sc001305.1_g010.1; Cse_sc001462.1_g040.1; Cse_sc002036.1_g010.1; Cse_sc002120.1_g040.1; Cse_sc002153.1_g070.1; Cse_sc003113.1_g010.1; Cse_sc003214.1_g050.1; Cse_sc004057.1_g010.1; Cse_sc007495.1_g020.1; Cse_sc011211.1_g010.1; Cse_sc018079.1_g020.1; Cse_sc019552.1_g020.1; Cse_sc025144.1_g030.1; Cse_sc031115.1_g020.1; Cse_sc031196.1_g030.1; Cse_sc036892.1_g010.1; Cse_sc03…
GO:0003865	3-oxo-5-alpha-steroid 4-dehydrogenase activity	molecular_function	6	6179	11	55481	4.65E-05	0.00042899	4.897615089	Cse_sc000834.1_g090.1; Cse_sc001694.1_g010.1; Cse_sc002006.1_g110.1; Cse_sc005296.1_g020.1; Cse_sc008556.1_g020.1; Cse_sc029934.1_g010.1
GO:0008519	ammonium transmembrane transporter activity	molecular_function	6	6179	11	55481	4.65E-05	0.00042899	4.897615089	Cse_sc000913.1_g050.1; Cse_sc005387.1_g050.1; Cse_sc005453.1_g040.1; Cse_sc008565.1_g060.1; Cse_sc012945.1_g020.1; Cse_sc016337.1_g030.1
GO:0047763	caffeate O-methyltransferase activity	molecular_function	14	6179	44	55481	4.80E-05	0.000441902	2.856942135	Cse_sc001285.1_g020.1; Cse_sc001285.1_g040.1; Cse_sc001864.1_g010.1; Cse_sc005124.1_g020.1; Cse_sc013765.1_g020.1; Cse_sc015325.1_g030.1; Cse_sc024780.1_g020.1; Cse_sc025450.1_g020.1; Cse_sc028636.1_g010.1; Cse_sc028684.1_g040.1; Cse_sc034813.1_g020.1; Cse_sc040638.1_g010.1; Cse_sc043648.1_g010.1; Cse_sc087463.1_g010.1
GO:2000652	regulation of secondary cell wall biogenesis	biological_process	8	6179	18	55481	4.96E-05	0.000454493	3.990649332	Cse_sc000044.1_g080.1; Cse_sc000151.1_g040.1; Cse_sc004343.1_g040.1; Cse_sc004648.1_g020.1; Cse_sc006222.1_g040.1; Cse_sc006931.1_g040.1; Cse_sc008114.1_g040.1; Cse_sc032324.1_g010.1
GO:0009922	fatty acid elongase activity	molecular_function	8	6179	18	55481	4.96E-05	0.000454493	3.990649332	Cse_sc009705.1_g010.1; Cse_sc012878.1_g030.1; Cse_sc021707.1_g020.1; Cse_sc021876.1_g010.1; Cse_sc035807.1_g030.1; Cse_sc042837.1_g010.1; Cse_sc050781.1_g010.1; Cse_sc051381.1_g010.1
GO:0006855	drug transmembrane transport	biological_process	28	6179	121	55481	5.02E-05	0.000458891	2.077776098	Cse_sc000009.1_g010.1; Cse_sc000037.1_g080.1; Cse_sc000149.1_g050.1; Cse_sc000149.1_g070.1; Cse_sc000403.1_g010.1; Cse_sc000477.1_g130.1; Cse_sc000570.1_g060.1; Cse_sc000802.1_g030.1; Cse_sc001414.1_g100.1; Cse_sc003595.1_g070.1; Cse_sc003932.1_g010.1; Cse_sc005704.1_g060.1; Cse_sc007552.1_g020.1; Cse_sc008580.1_g040.1; Cse_sc008626.1_g010.1; Cse_sc009397.1_g030.1; Cse_sc011798.1_g010.1; Cse_sc01…
GO:1900057	positive regulation of leaf senescence	biological_process	10	6179	26	55481	5.05E-05	0.000459491	3.453446537	Cse_sc000067.1_g030.1; Cse_sc000615.1_g030.1; Cse_sc001011.1_g060.1; Cse_sc001844.1_g050.1; Cse_sc008929.1_g010.1; Cse_sc011667.1_g040.1; Cse_sc019439.1_g010.1; Cse_sc019439.1_g030.1; Cse_sc021863.1_g020.1; Cse_sc023585.1_g010.1
GO:0004575	sucrose alpha-glucosidase activity	molecular_function	10	6179	26	55481	5.05E-05	0.000459491	3.453446537	Cse_sc002363.1_g070.1; Cse_sc002970.1_g040.1; Cse_sc003450.1_g040.1; Cse_sc009525.1_g010.1; Cse_sc018597.1_g010.1; Cse_sc025351.1_g020.1; Cse_sc030052.1_g010.1; Cse_sc038162.1_g030.1; Cse_sc058819.1_g010.1; Cse_sc081160.1_g010.1
GO:0042542	response to hydrogen peroxide	biological_process	34	6179	158	55481	5.28E-05	0.000475998	1.93218148	Cse_sc000033.1_g080.1; Cse_sc000338.1_g080.1; Cse_sc000726.1_g020.1; Cse_sc000788.1_g050.1; Cse_sc001052.1_g070.1; Cse_sc001345.1_g010.1; Cse_sc001664.1_g060.1; Cse_sc001898.1_g010.1; Cse_sc002363.1_g070.1; Cse_sc003408.1_g060.1; Cse_sc004621.1_g080.1; Cse_sc005145.1_g020.1; Cse_sc006446.1_g050.1; Cse_sc007597.1_g040.1; Cse_sc007649.1_g040.1; Cse_sc009666.1_g020.1; Cse_sc010140.1_g030.1; Cse_sc01…
GO:0046983	protein dimerization activity	molecular_function	114	6179	721	55481	5.28E-05	0.000475998	1.419697023	Cse_sc000044.1_g140.1; Cse_sc000082.1_g120.1; Cse_sc000102.1_g110.1; Cse_sc000223.1_g120.1; Cse_sc000266.1_g030.1; Cse_sc000289.1_g110.1; Cse_sc000306.1_g020.1; Cse_sc000547.1_g030.1; Cse_sc000548.1_g070.1; Cse_sc000570.1_g080.1; Cse_sc001237.1_g030.1; Cse_sc001285.1_g020.1; Cse_sc001285.1_g040.1; Cse_sc001525.1_g050.1; Cse_sc001812.1_g020.1; Cse_sc001835.1_g040.1; Cse_sc001864.1_g010.1; Cse_sc00…
GO:0090332	stomatal closure	biological_process	9	6179	22	55481	5.29E-05	0.000475998	3.673211317	Cse_sc000586.1_g080.1; Cse_sc001186.1_g070.1; Cse_sc001384.1_g180.1; Cse_sc003555.1_g010.1; Cse_sc005287.1_g030.1; Cse_sc023526.1_g010.1; Cse_sc028872.1_g030.1; Cse_sc030302.1_g020.1; Cse_sc030456.1_g030.1
GO:0008381	mechanosensitive ion channel activity	molecular_function	9	6179	22	55481	5.29E-05	0.000475998	3.673211317	Cse_sc000716.1_g070.1; Cse_sc001506.1_g010.1; Cse_sc004756.1_g030.1; Cse_sc007802.1_g010.1; Cse_sc010878.1_g050.1; Cse_sc020082.1_g010.1; Cse_sc028041.1_g040.1; Cse_sc029845.1_g020.1; Cse_sc037427.1_g010.1
GO:0031982	vesicle	cellular_component	9	6179	22	55481	5.29E-05	0.000475998	3.673211317	Cse_sc001468.1_g030.1; Cse_sc001812.1_g070.1; Cse_sc005759.1_g020.1; Cse_sc008363.1_g030.1; Cse_sc010888.1_g010.1; Cse_sc019077.1_g010.1; Cse_sc036425.1_g010.1; Cse_sc037968.1_g020.1; Cse_sc056513.1_g020.1
GO:0009636	response to toxic substance	biological_process	19	6179	70	55481	5.30E-05	0.000476172	2.437146556	Cse_sc000311.1_g040.1; Cse_sc000380.1_g120.1; Cse_sc001853.1_g020.1; Cse_sc003421.1_g030.1; Cse_sc005906.1_g050.1; Cse_sc010010.1_g040.1; Cse_sc011745.1_g050.1; Cse_sc012942.1_g060.1; Cse_sc020341.1_g020.1; Cse_sc021724.1_g020.1; Cse_sc023188.1_g030.1; Cse_sc025584.1_g010.1; Cse_sc028455.1_g010.1; Cse_sc029819.1_g010.1; Cse_sc029928.1_g040.1; Cse_sc038548.1_g010.1; Cse_sc044946.1_g020.1; Cse_sc06…
GO:0001228	DNA-binding transcription activator activity, RNA polymerase II-specific	molecular_function	12	6179	35	55481	5.48E-05	0.000491018	3.078500913	Cse_sc000266.1_g030.1; Cse_sc001237.1_g030.1; Cse_sc002820.1_g020.1; Cse_sc003859.1_g020.1; Cse_sc004053.1_g050.1; Cse_sc004961.1_g030.1; Cse_sc005264.1_g020.1; Cse_sc005492.1_g030.1; Cse_sc016753.1_g020.1; Cse_sc016876.1_g020.1; Cse_sc021065.1_g010.1; Cse_sc027048.1_g010.1
GO:0009733	response to auxin	biological_process	73	6179	422	55481	5.62E-05	0.000502642	1.55323259	Cse_sc000082.1_g120.1; Cse_sc000098.1_g130.1; Cse_sc000244.1_g130.1; Cse_sc000245.1_g020.1; Cse_sc000338.1_g080.1; Cse_sc000403.1_g120.1; Cse_sc000461.1_g040.1; Cse_sc001128.1_g030.1; Cse_sc001207.1_g050.1; Cse_sc001217.1_g070.1; Cse_sc001315.1_g020.1; Cse_sc001687.1_g020.1; Cse_sc001697.1_g060.1; Cse_sc001794.1_g030.1; Cse_sc001808.1_g040.1; Cse_sc002078.1_g070.1; Cse_sc002278.1_g030.1; Cse_sc00…
GO:0042546	cell wall biogenesis	biological_process	20	6179	76	55481	5.99E-05	0.000533418	2.362884473	Cse_sc000015.1_g050.1; Cse_sc000566.1_g070.1; Cse_sc000651.1_g030.1; Cse_sc000651.1_g090.1; Cse_sc000651.1_g110.1; Cse_sc000726.1_g040.1; Cse_sc001519.1_g040.1; Cse_sc002506.1_g020.1; Cse_sc003175.1_g020.1; Cse_sc003820.1_g090.1; Cse_sc006887.1_g030.1; Cse_sc013547.1_g020.1; Cse_sc017824.1_g020.1; Cse_sc019365.1_g050.1; Cse_sc020401.1_g040.1; Cse_sc020465.1_g030.1; Cse_sc020713.1_g020.1; Cse_sc02…
GO:0009640	photomorphogenesis	biological_process	20	6179	76	55481	5.99E-05	0.000533418	2.362884473	Cse_sc000264.1_g050.1; Cse_sc000677.1_g030.1; Cse_sc001609.1_g050.1; Cse_sc002395.1_g020.1; Cse_sc002509.1_g030.1; Cse_sc003688.1_g020.1; Cse_sc004241.1_g050.1; Cse_sc004468.1_g030.1; Cse_sc004980.1_g010.1; Cse_sc007704.1_g030.1; Cse_sc008134.1_g050.1; Cse_sc011266.1_g030.1; Cse_sc011622.1_g030.1; Cse_sc013657.1_g050.1; Cse_sc014764.1_g010.1; Cse_sc015105.1_g050.1; Cse_sc018784.1_g010.1; Cse_sc02…
GO:0052544	defense response by callose deposition in cell wall	biological_process	13	6179	40	55481	6.13E-05	0.000542906	2.918162324	Cse_sc000149.1_g050.1; Cse_sc000149.1_g070.1; Cse_sc000403.1_g010.1; Cse_sc000477.1_g130.1; Cse_sc002631.1_g040.1; Cse_sc003595.1_g070.1; Cse_sc006385.1_g020.1; Cse_sc007503.1_g060.1; Cse_sc007770.1_g020.1; Cse_sc009429.1_g020.1; Cse_sc010548.1_g010.1; Cse_sc012106.1_g040.1; Cse_sc019860.1_g020.1
GO:0055062	phosphate ion homeostasis	biological_process	13	6179	40	55481	6.13E-05	0.000542906	2.918162324	Cse_sc000162.1_g030.1; Cse_sc001556.1_g020.1; Cse_sc003450.1_g010.1; Cse_sc003535.1_g020.1; Cse_sc005969.1_g010.1; Cse_sc010081.1_g040.1; Cse_sc012138.1_g020.1; Cse_sc012718.1_g010.1; Cse_sc015080.1_g020.1; Cse_sc017241.1_g020.1; Cse_sc018600.1_g010.1; Cse_sc023754.1_g010.1; Cse_sc031558.1_g020.1
GO:0004630	phospholipase D activity	molecular_function	16	6179	55	55481	6.39E-05	0.00056406	2.612061381	Cse_sc000395.1_g030.1; Cse_sc001462.1_g040.1; Cse_sc002368.1_g030.1; Cse_sc002368.1_g090.1; Cse_sc003011.1_g040.1; Cse_sc003438.1_g020.1; Cse_sc005370.1_g020.1; Cse_sc012662.1_g010.1; Cse_sc016134.1_g010.1; Cse_sc016525.1_g020.1; Cse_sc016908.1_g020.1; Cse_sc022772.1_g030.1; Cse_sc024226.1_g010.1; Cse_sc025144.1_g030.1; Cse_sc025610.1_g010.1; Cse_sc032033.1_g010.1
GO:0070290	N-acylphosphatidylethanolamine-specific phospholipase D activity	molecular_function	16	6179	55	55481	6.39E-05	0.00056406	2.612061381	Cse_sc000395.1_g030.1; Cse_sc001462.1_g040.1; Cse_sc002368.1_g030.1; Cse_sc002368.1_g090.1; Cse_sc003011.1_g040.1; Cse_sc003438.1_g020.1; Cse_sc005370.1_g020.1; Cse_sc012662.1_g010.1; Cse_sc016134.1_g010.1; Cse_sc016525.1_g020.1; Cse_sc016908.1_g020.1; Cse_sc022772.1_g030.1; Cse_sc024226.1_g010.1; Cse_sc025144.1_g030.1; Cse_sc025610.1_g010.1; Cse_sc032033.1_g010.1
GO:0004031	aldehyde oxidase activity	molecular_function	14	6179	45	55481	6.46E-05	0.00056609	2.793454532	Cse_sc000245.1_g030.1; Cse_sc001229.1_g020.1; Cse_sc004557.1_g010.1; Cse_sc006394.1_g030.1; Cse_sc010321.1_g030.1; Cse_sc011082.1_g020.1; Cse_sc011082.1_g050.1; Cse_sc011641.1_g010.1; Cse_sc013386.1_g010.1; Cse_sc013707.1_g010.1; Cse_sc017824.1_g040.1; Cse_sc020707.1_g020.1; Cse_sc029438.1_g010.1; Cse_sc202944.1_g010.1
GO:0010043	response to zinc ion	biological_process	14	6179	45	55481	6.46E-05	0.00056609	2.793454532	Cse_sc000788.1_g050.1; Cse_sc001052.1_g070.1; Cse_sc001898.1_g010.1; Cse_sc003578.1_g030.1; Cse_sc004621.1_g080.1; Cse_sc005145.1_g020.1; Cse_sc012502.1_g030.1; Cse_sc014299.1_g040.1; Cse_sc017245.1_g030.1; Cse_sc017319.1_g030.1; Cse_sc025580.1_g010.1; Cse_sc028545.1_g010.1; Cse_sc031946.1_g020.1; Cse_sc041953.1_g010.1
GO:0008422	beta-glucosidase activity	molecular_function	14	6179	45	55481	6.46E-05	0.00056609	2.793454532	Cse_sc003501.1_g010.1; Cse_sc003850.1_g030.1; Cse_sc004678.1_g060.1; Cse_sc006141.1_g020.1; Cse_sc006636.1_g030.1; Cse_sc006852.1_g010.1; Cse_sc008524.1_g040.1; Cse_sc011220.1_g030.1; Cse_sc013546.1_g020.1; Cse_sc024939.1_g010.1; Cse_sc039672.1_g010.1; Cse_sc041534.1_g020.1; Cse_sc053877.1_g010.1; Cse_sc183293.1_g010.1
GO:0016126	sterol biosynthetic process	biological_process	15	6179	50	55481	6.53E-05	0.000570877	2.693688299	Cse_sc001230.1_g070.1; Cse_sc001230.1_g080.1; Cse_sc001347.1_g020.1; Cse_sc001388.1_g070.1; Cse_sc001721.1_g050.1; Cse_sc002368.1_g010.1; Cse_sc003187.1_g030.1; Cse_sc003378.1_g060.1; Cse_sc003952.1_g040.1; Cse_sc008164.1_g030.1; Cse_sc008184.1_g050.1; Cse_sc009063.1_g020.1; Cse_sc012197.1_g010.1; Cse_sc012645.1_g050.1; Cse_sc013205.1_g020.1
GO:0009834	plant-type secondary cell wall biogenesis	biological_process	21	6179	82	55481	6.59E-05	0.000574454	2.299490011	Cse_sc000151.1_g040.1; Cse_sc000324.1_g040.1; Cse_sc000528.1_g070.1; Cse_sc000605.1_g090.1; Cse_sc001438.1_g070.1; Cse_sc001572.1_g030.1; Cse_sc003564.1_g050.1; Cse_sc004343.1_g040.1; Cse_sc006446.1_g020.1; Cse_sc007946.1_g040.1; Cse_sc011115.1_g020.1; Cse_sc012217.1_g020.1; Cse_sc014682.1_g040.1; Cse_sc015304.1_g040.1; Cse_sc016156.1_g050.1; Cse_sc018936.1_g030.1; Cse_sc019397.1_g040.1; Cse_sc02…
GO:0009959	negative gravitropism	biological_process	11	6179	31	55481	6.60E-05	0.000574454	3.186082934	Cse_sc002278.1_g010.1; Cse_sc004515.1_g020.1; Cse_sc015566.1_g020.1; Cse_sc020866.1_g030.1; Cse_sc022675.1_g020.1; Cse_sc023342.1_g010.1; Cse_sc029495.1_g030.1; Cse_sc034893.1_g010.1; Cse_sc037705.1_g010.1; Cse_sc108954.1_g010.1; Cse_sc141285.1_g010.1
GO:0005537	mannose binding	molecular_function	7	6179	15	55481	7.34E-05	0.000637966	4.190181799	Cse_sc002163.1_g020.1; Cse_sc004032.1_g080.1; Cse_sc009029.1_g020.1; Cse_sc009029.1_g030.1; Cse_sc046956.1_g020.1; Cse_sc053534.1_g020.1; Cse_sc104196.1_g010.1
GO:0009846	pollen germination	biological_process	26	6179	112	55481	8.05E-05	0.000698064	2.08440166	Cse_sc000008.1_g080.1; Cse_sc000257.1_g060.1; Cse_sc000420.1_g200.1; Cse_sc000804.1_g010.1; Cse_sc001713.1_g030.1; Cse_sc001753.1_g020.1; Cse_sc003101.1_g030.1; Cse_sc004926.1_g060.1; Cse_sc005195.1_g020.1; Cse_sc005503.1_g050.1; Cse_sc006646.1_g040.1; Cse_sc006852.1_g030.1; Cse_sc007265.1_g020.1; Cse_sc007380.1_g040.1; Cse_sc008692.1_g010.1; Cse_sc009315.1_g020.1; Cse_sc010730.1_g050.1; Cse_sc01…
GO:0007267	cell-cell signaling	biological_process	13	6179	41	55481	8.35E-05	0.000720982	2.846987633	Cse_sc000208.1_g100.1; Cse_sc000464.1_g040.1; Cse_sc002195.1_g040.1; Cse_sc002266.1_g010.1; Cse_sc003652.1_g050.1; Cse_sc008109.1_g020.1; Cse_sc008242.1_g030.1; Cse_sc008800.1_g010.1; Cse_sc014643.1_g010.1; Cse_sc015327.1_g050.1; Cse_sc017343.1_g010.1; Cse_sc018918.1_g020.1; Cse_sc019442.1_g020.1
GO:0009870	defense response signaling pathway, resistance gene-dependent	biological_process	13	6179	41	55481	8.35E-05	0.000720982	2.846987633	Cse_sc000466.1_g040.1; Cse_sc000466.1_g080.1; Cse_sc001874.1_g010.1; Cse_sc006882.1_g040.1; Cse_sc009061.1_g030.1; Cse_sc009429.1_g020.1; Cse_sc010077.1_g020.1; Cse_sc010661.1_g040.1; Cse_sc010789.1_g010.1; Cse_sc010789.1_g020.1; Cse_sc014155.1_g010.1; Cse_sc024589.1_g020.1; Cse_sc026286.1_g010.1
GO:0070301	cellular response to hydrogen peroxide	biological_process	8	6179	19	55481	8.49E-05	0.000730963	3.780615157	Cse_sc001845.1_g010.1; Cse_sc001845.1_g020.1; Cse_sc008928.1_g010.1; Cse_sc018079.1_g020.1; Cse_sc019552.1_g020.1; Cse_sc028545.1_g010.1; Cse_sc031115.1_g020.1; Cse_sc031641.1_g030.1
GO:0006468	protein phosphorylation	biological_process	61	6179	343	55481	8.91E-05	0.00076612	1.59684146	Cse_sc000082.1_g020.1; Cse_sc000131.1_g130.1; Cse_sc000298.1_g080.1; Cse_sc000321.1_g080.1; Cse_sc000429.1_g040.1; Cse_sc001081.1_g050.1; Cse_sc001739.1_g060.1; Cse_sc001929.1_g020.1; Cse_sc002209.1_g050.1; Cse_sc002352.1_g050.1; Cse_sc002494.1_g050.1; Cse_sc003509.1_g050.1; Cse_sc003573.1_g020.1; Cse_sc003585.1_g060.1; Cse_sc003799.1_g080.1; Cse_sc004509.1_g020.1; Cse_sc005246.1_g030.1; Cse_sc00…
GO:0019900	kinase binding	molecular_function	20	6179	78	55481	9.05E-05	0.00077601	2.302297692	Cse_sc000224.1_g010.1; Cse_sc001023.1_g100.1; Cse_sc001181.1_g010.1; Cse_sc001315.1_g020.1; Cse_sc001609.1_g030.1; Cse_sc004288.1_g020.1; Cse_sc005633.1_g050.1; Cse_sc005793.1_g050.1; Cse_sc007076.1_g020.1; Cse_sc008234.1_g020.1; Cse_sc008356.1_g040.1; Cse_sc009076.1_g040.1; Cse_sc012338.1_g070.1; Cse_sc018863.1_g040.1; Cse_sc019405.1_g020.1; Cse_sc020873.1_g010.1; Cse_sc022254.1_g010.1; Cse_sc02…
GO:0005881	cytoplasmic microtubule	cellular_component	4	6179	6	55481	9.31E-05	0.000786936	5.985973998	Cse_sc000221.1_g090.1; Cse_sc004509.1_g040.1; Cse_sc005287.1_g030.1; Cse_sc030456.1_g030.1
GO:0046246	terpene biosynthetic process	biological_process	4	6179	6	55481	9.31E-05	0.000786936	5.985973998	Cse_sc001796.1_g070.1; Cse_sc005033.1_g020.1; Cse_sc014004.1_g010.1; Cse_sc014122.1_g040.1
GO:0097007	4,8,12-trimethyltrideca-1,3,7,11-tetraene synthase activity	molecular_function	4	6179	6	55481	9.31E-05	0.000786936	5.985973998	Cse_sc001796.1_g070.1; Cse_sc005033.1_g020.1; Cse_sc014004.1_g010.1; Cse_sc014122.1_g040.1
GO:0097008	(3E)-4,8-dimethyl-1,3,7-nonatriene synthase activity	molecular_function	4	6179	6	55481	9.31E-05	0.000786936	5.985973998	Cse_sc001796.1_g070.1; Cse_sc005033.1_g020.1; Cse_sc014004.1_g010.1; Cse_sc014122.1_g040.1
GO:1901430	positive regulation of syringal lignin biosynthetic process	biological_process	4	6179	6	55481	9.31E-05	0.000786936	5.985973998	Cse_sc002746.1_g030.1; Cse_sc002746.1_g050.1; Cse_sc036486.1_g010.1; Cse_sc053835.1_g010.1
GO:0051513	regulation of monopolar cell growth	biological_process	4	6179	6	55481	9.31E-05	0.000786936	5.985973998	Cse_sc003007.1_g070.1; Cse_sc009464.1_g050.1; Cse_sc012252.1_g030.1; Cse_sc038292.1_g010.1
GO:1905177	tracheary element differentiation	biological_process	4	6179	6	55481	9.31E-05	0.000786936	5.985973998	Cse_sc003421.1_g010.1; Cse_sc004803.1_g050.1; Cse_sc009583.1_g010.1; Cse_sc068923.1_g010.1
GO:0051592	response to calcium ion	biological_process	6	6179	12	55481	0.000100747	0.00084585	4.489480498	Cse_sc000989.1_g040.1; Cse_sc005287.1_g030.1; Cse_sc015080.1_g020.1; Cse_sc018106.1_g010.1; Cse_sc023754.1_g010.1; Cse_sc030456.1_g030.1
GO:0015186	L-glutamine transmembrane transporter activity	molecular_function	6	6179	12	55481	0.000100747	0.00084585	4.489480498	Cse_sc005874.1_g020.1; Cse_sc010432.1_g010.1; Cse_sc012729.1_g020.1; Cse_sc026434.1_g010.1; Cse_sc035132.1_g020.1; Cse_sc138209.1_g010.1
GO:0098712	L-glutamate import across plasma membrane	biological_process	6	6179	12	55481	0.000100747	0.00084585	4.489480498	Cse_sc005874.1_g020.1; Cse_sc010432.1_g010.1; Cse_sc012729.1_g020.1; Cse_sc026434.1_g010.1; Cse_sc035132.1_g020.1; Cse_sc138209.1_g010.1
GO:0019901	protein kinase binding	molecular_function	22	6179	90	55481	0.000102808	0.000861341	2.194857133	Cse_sc000321.1_g080.1; Cse_sc000586.1_g080.1; Cse_sc001758.1_g060.1; Cse_sc002571.1_g070.1; Cse_sc003509.1_g050.1; Cse_sc003573.1_g020.1; Cse_sc003799.1_g080.1; Cse_sc004509.1_g020.1; Cse_sc005960.1_g030.1; Cse_sc008784.1_g020.1; Cse_sc009189.1_g040.1; Cse_sc009402.1_g020.1; Cse_sc010602.1_g020.1; Cse_sc010690.1_g020.1; Cse_sc012159.1_g020.1; Cse_sc012525.1_g030.1; Cse_sc014813.1_g020.1; Cse_sc02…
GO:0009698	phenylpropanoid metabolic process	biological_process	16	6179	57	55481	0.000105214	0.000879651	2.520410104	Cse_sc000475.1_g010.1; Cse_sc000604.1_g050.1; Cse_sc003771.1_g010.1; Cse_sc005747.1_g070.1; Cse_sc005801.1_g010.1; Cse_sc006535.1_g030.1; Cse_sc008096.1_g030.1; Cse_sc011387.1_g020.1; Cse_sc011930.1_g010.1; Cse_sc012503.1_g020.1; Cse_sc012915.1_g020.1; Cse_sc013241.1_g010.1; Cse_sc014974.1_g030.1; Cse_sc017052.1_g020.1; Cse_sc018968.1_g020.1; Cse_sc045632.1_g010.1
GO:0007140	male meiotic nuclear division	biological_process	18	6179	68	55481	0.000112333	0.000937207	2.376783793	Cse_sc000547.1_g030.1; Cse_sc001288.1_g100.1; Cse_sc001399.1_g060.1; Cse_sc001458.1_g030.1; Cse_sc002392.1_g030.1; Cse_sc002457.1_g030.1; Cse_sc002838.1_g030.1; Cse_sc005073.1_g030.1; Cse_sc006511.1_g010.1; Cse_sc008522.1_g040.1; Cse_sc008563.1_g060.1; Cse_sc009633.1_g060.1; Cse_sc010622.1_g020.1; Cse_sc012815.1_g020.1; Cse_sc014466.1_g030.1; Cse_sc021074.1_g010.1; Cse_sc046746.1_g010.1; Cse_sc08…
GO:0009938	negative regulation of gibberellic acid mediated signaling pathway	biological_process	10	6179	28	55481	0.000113474	0.000944748	3.206771785	Cse_sc000447.1_g040.1; Cse_sc000641.1_g030.1; Cse_sc005660.1_g020.1; Cse_sc011262.1_g020.1; Cse_sc011381.1_g010.1; Cse_sc018737.1_g010.1; Cse_sc024938.1_g030.1; Cse_sc031677.1_g020.1; Cse_sc044614.1_g010.1; Cse_sc054260.1_g010.1
GO:0046982	protein heterodimerization activity	molecular_function	59	6179	332	55481	0.000115082	0.000956143	1.595658731	Cse_sc000092.1_g110.1; Cse_sc000269.1_g070.1; Cse_sc000556.1_g070.1; Cse_sc000695.1_g070.1; Cse_sc001102.1_g090.1; Cse_sc001164.1_g040.1; Cse_sc001420.1_g020.1; Cse_sc001552.1_g070.1; Cse_sc001780.1_g090.1; Cse_sc001935.1_g030.1; Cse_sc002077.1_g030.1; Cse_sc002591.1_g010.1; Cse_sc002623.1_g050.1; Cse_sc002820.1_g010.1; Cse_sc003659.1_g050.1; Cse_sc004091.1_g050.1; Cse_sc004621.1_g100.1; Cse_sc00…
GO:0015691	cadmium ion transport	biological_process	5	6179	9	55481	0.000118492	0.000958507	4.988311665	Cse_sc000149.1_g050.1; Cse_sc000149.1_g070.1; Cse_sc000403.1_g010.1; Cse_sc000477.1_g130.1; Cse_sc003595.1_g070.1
GO:0042344	indole glucosinolate catabolic process	biological_process	5	6179	9	55481	0.000118492	0.000958507	4.988311665	Cse_sc000149.1_g050.1; Cse_sc000149.1_g070.1; Cse_sc000403.1_g010.1; Cse_sc000477.1_g130.1; Cse_sc003595.1_g070.1
GO:0071366	cellular response to indolebutyric acid stimulus	biological_process	5	6179	9	55481	0.000118492	0.000958507	4.988311665	Cse_sc000149.1_g050.1; Cse_sc000149.1_g070.1; Cse_sc000403.1_g010.1; Cse_sc000477.1_g130.1; Cse_sc003595.1_g070.1
GO:0051233	spindle midzone	cellular_component	5	6179	9	55481	0.000118492	0.000958507	4.988311665	Cse_sc000221.1_g090.1; Cse_sc004509.1_g040.1; Cse_sc005621.1_g040.1; Cse_sc015050.1_g020.1; Cse_sc034145.1_g020.1
GO:0060548	negative regulation of cell death	biological_process	5	6179	9	55481	0.000118492	0.000958507	4.988311665	Cse_sc000466.1_g080.1; Cse_sc009533.1_g030.1; Cse_sc013426.1_g010.1; Cse_sc019248.1_g040.1; Cse_sc026286.1_g010.1
GO:1905582	response to mannose	biological_process	5	6179	9	55481	0.000118492	0.000958507	4.988311665	Cse_sc000808.1_g040.1; Cse_sc009076.1_g040.1; Cse_sc014271.1_g020.1; Cse_sc018863.1_g040.1; Cse_sc047936.1_g010.1
GO:0010600	regulation of auxin biosynthetic process	biological_process	5	6179	9	55481	0.000118492	0.000958507	4.988311665	Cse_sc001482.1_g030.1; Cse_sc002748.1_g090.1; Cse_sc011416.1_g030.1; Cse_sc024154.1_g010.1; Cse_sc053863.1_g010.1
GO:0000771	agglutination involved in conjugation	biological_process	5	6179	9	55481	0.000118492	0.000958507	4.988311665	Cse_sc002163.1_g020.1; Cse_sc004032.1_g080.1; Cse_sc046956.1_g020.1; Cse_sc053534.1_g020.1; Cse_sc104196.1_g010.1
GO:1900386	positive regulation of flavonol biosynthetic process	biological_process	5	6179	9	55481	0.000118492	0.000958507	4.988311665	Cse_sc002465.1_g020.1; Cse_sc006944.1_g010.1; Cse_sc008230.1_g040.1; Cse_sc010366.1_g030.1; Cse_sc023540.1_g010.1
GO:0010148	transpiration	biological_process	5	6179	9	55481	0.000118492	0.000958507	4.988311665	Cse_sc005117.1_g040.1; Cse_sc008373.1_g020.1; Cse_sc008526.1_g010.1; Cse_sc018182.1_g020.1; Cse_sc022651.1_g020.1
GO:1901959	positive regulation of cutin biosynthetic process	biological_process	5	6179	9	55481	0.000118492	0.000958507	4.988311665	Cse_sc005117.1_g040.1; Cse_sc007076.1_g020.1; Cse_sc008234.1_g020.1; Cse_sc018182.1_g020.1; Cse_sc020246.1_g010.1
GO:0052739	phosphatidylserine 1-acylhydrolase activity	molecular_function	5	6179	9	55481	0.000118492	0.000958507	4.988311665	Cse_sc010384.1_g080.1; Cse_sc022347.1_g020.1; Cse_sc030971.1_g010.1; Cse_sc031779.1_g010.1; Cse_sc035831.1_g050.1
GO:0052740	1-acyl-2-lysophosphatidylserine acylhydrolase activity	molecular_function	5	6179	9	55481	0.000118492	0.000958507	4.988311665	Cse_sc010384.1_g080.1; Cse_sc022347.1_g020.1; Cse_sc030971.1_g010.1; Cse_sc031779.1_g010.1; Cse_sc035831.1_g050.1
GO:0032580	Golgi cisterna membrane	cellular_component	17	6179	63	55481	0.000123282	0.00099524	2.422894237	Cse_sc000183.1_g080.1; Cse_sc000358.1_g080.1; Cse_sc003123.1_g030.1; Cse_sc003834.1_g030.1; Cse_sc009298.1_g040.1; Cse_sc009382.1_g040.1; Cse_sc009823.1_g050.1; Cse_sc010957.1_g050.1; Cse_sc013821.1_g040.1; Cse_sc014457.1_g020.1; Cse_sc015803.1_g030.1; Cse_sc017489.1_g030.1; Cse_sc018079.1_g010.1; Cse_sc021978.1_g030.1; Cse_sc026468.1_g010.1; Cse_sc033847.1_g020.1; Cse_sc039922.1_g030.1
GO:0003680	AT DNA binding	molecular_function	9	6179	24	55481	0.00012995	0.001044415	3.367110374	Cse_sc000589.1_g080.1; Cse_sc001178.1_g050.1; Cse_sc005824.1_g050.1; Cse_sc007243.1_g020.1; Cse_sc007704.1_g030.1; Cse_sc010334.1_g050.1; Cse_sc015545.1_g030.1; Cse_sc034173.1_g020.1; Cse_sc036266.1_g020.1
GO:0051555	flavonol biosynthetic process	biological_process	9	6179	24	55481	0.00012995	0.001044415	3.367110374	Cse_sc002465.1_g020.1; Cse_sc004522.1_g050.1; Cse_sc005124.1_g020.1; Cse_sc006944.1_g010.1; Cse_sc008230.1_g040.1; Cse_sc010366.1_g030.1; Cse_sc013365.1_g030.1; Cse_sc023540.1_g010.1; Cse_sc060878.1_g010.1
GO:0003779	actin binding	molecular_function	25	6179	109	55481	0.000130159	0.001044415	2.059394724	Cse_sc000009.1_g090.1; Cse_sc000158.1_g010.1; Cse_sc001514.1_g020.1; Cse_sc001732.1_g030.1; Cse_sc002142.1_g060.1; Cse_sc002324.1_g010.1; Cse_sc003896.1_g060.1; Cse_sc006532.1_g020.1; Cse_sc007997.1_g040.1; Cse_sc010140.1_g020.1; Cse_sc010615.1_g020.1; Cse_sc014479.1_g020.1; Cse_sc017689.1_g010.1; Cse_sc017775.1_g020.1; Cse_sc018422.1_g010.1; Cse_sc018873.1_g010.1; Cse_sc019612.1_g020.1; Cse_sc02…
GO:0004096	catalase activity	molecular_function	7	6179	16	55481	0.000132478	0.001060886	3.928295436	Cse_sc000008.1_g180.1; Cse_sc007314.1_g020.1; Cse_sc009349.1_g040.1; Cse_sc010949.1_g010.1; Cse_sc014953.1_g020.1; Cse_sc018000.1_g050.1; Cse_sc022811.1_g020.1
GO:0009944	polarity specification of adaxial/abaxial axis	biological_process	11	6179	33	55481	0.000134029	0.00107116	2.992986999	Cse_sc000244.1_g130.1; Cse_sc000374.1_g030.1; Cse_sc000753.1_g070.1; Cse_sc002278.1_g030.1; Cse_sc006528.1_g010.1; Cse_sc007271.1_g010.1; Cse_sc011972.1_g050.1; Cse_sc013039.1_g020.1; Cse_sc023298.1_g020.1; Cse_sc029081.1_g010.1; Cse_sc033219.1_g010.1
GO:0008553	proton-exporting ATPase activity, phosphorylative mechanism	molecular_function	18	6179	69	55481	0.000138959	0.001106737	2.342337651	Cse_sc000741.1_g050.1; Cse_sc001244.1_g090.1; Cse_sc001754.1_g060.1; Cse_sc001989.1_g050.1; Cse_sc002740.1_g080.1; Cse_sc004096.1_g060.1; Cse_sc005465.1_g020.1; Cse_sc009967.1_g010.1; Cse_sc015063.1_g040.1; Cse_sc021397.1_g010.1; Cse_sc022821.1_g010.1; Cse_sc028602.1_g020.1; Cse_sc029373.1_g010.1; Cse_sc085423.1_g010.1; Cse_sc092998.1_g010.1; Cse_sc126677.1_g010.1; Cse_sc202023.1_g010.1; Cse_sc21…
GO:0006833	water transport	biological_process	8	6179	20	55481	0.000139036	0.001106737	3.591584399	Cse_sc000215.1_g010.1; Cse_sc001543.1_g030.1; Cse_sc002382.1_g030.1; Cse_sc003348.1_g020.1; Cse_sc004013.1_g030.1; Cse_sc010612.1_g020.1; Cse_sc012068.1_g040.1; Cse_sc013053.1_g020.1
GO:0045787	positive regulation of cell cycle	biological_process	15	6179	53	55481	0.000142129	0.001129104	2.541215376	Cse_sc000321.1_g080.1; Cse_sc003509.1_g050.1; Cse_sc003573.1_g020.1; Cse_sc003799.1_g080.1; Cse_sc004509.1_g020.1; Cse_sc005158.1_g020.1; Cse_sc009189.1_g040.1; Cse_sc009402.1_g020.1; Cse_sc010690.1_g020.1; Cse_sc012525.1_g030.1; Cse_sc014813.1_g020.1; Cse_sc019862.1_g010.1; Cse_sc028098.1_g020.1; Cse_sc035235.1_g010.1; Cse_sc048418.1_g010.1
GO:0004029	aldehyde dehydrogenase (NAD) activity	molecular_function	12	6179	38	55481	0.000145705	0.001152922	2.835461367	Cse_sc000257.1_g050.1; Cse_sc000844.1_g080.1; Cse_sc002813.1_g050.1; Cse_sc004060.1_g050.1; Cse_sc007222.1_g050.1; Cse_sc007378.1_g040.1; Cse_sc010378.1_g060.1; Cse_sc015187.1_g010.1; Cse_sc015187.1_g020.1; Cse_sc021254.1_g010.1; Cse_sc026781.1_g010.1; Cse_sc042098.1_g030.1
GO:0043878	glyceraldehyde-3-phosphate dehydrogenase (NAD+) (non-phosphorylating) activity	molecular_function	12	6179	38	55481	0.000145705	0.001152922	2.835461367	Cse_sc000257.1_g050.1; Cse_sc000844.1_g080.1; Cse_sc002813.1_g050.1; Cse_sc004060.1_g050.1; Cse_sc007222.1_g050.1; Cse_sc007378.1_g040.1; Cse_sc010378.1_g060.1; Cse_sc015187.1_g010.1; Cse_sc015187.1_g020.1; Cse_sc021254.1_g010.1; Cse_sc026781.1_g010.1; Cse_sc042098.1_g030.1
GO:0005615	extracellular space	cellular_component	38	6179	192	55481	0.00015065	0.001189688	1.777086031	Cse_sc000171.1_g090.1; Cse_sc001725.1_g090.1; Cse_sc002245.1_g020.1; Cse_sc002502.1_g080.1; Cse_sc002616.1_g060.1; Cse_sc002910.1_g020.1; Cse_sc003329.1_g030.1; Cse_sc003903.1_g020.1; Cse_sc003931.1_g070.1; Cse_sc004397.1_g020.1; Cse_sc004512.1_g060.1; Cse_sc005445.1_g020.1; Cse_sc007560.1_g050.1; Cse_sc009540.1_g030.1; Cse_sc010430.1_g050.1; Cse_sc011641.1_g010.1; Cse_sc012831.1_g040.1; Cse_sc01…
GO:0035618	root hair	cellular_component	3	6179	4	55481	0.000153717	0.001190334	6.734220748	Cse_sc000409.1_g010.1; Cse_sc014832.1_g020.1; Cse_sc038821.1_g010.1
GO:1990931	RNA N6-methyladenosine dioxygenase activity	molecular_function	3	6179	4	55481	0.000153717	0.001190334	6.734220748	Cse_sc000716.1_g120.1; Cse_sc022430.1_g010.1; Cse_sc038725.1_g010.1
GO:1902479	positive regulation of defense response to bacterium, incompatible interaction	biological_process	3	6179	4	55481	0.000153717	0.001190334	6.734220748	Cse_sc002261.1_g060.1; Cse_sc010655.1_g030.1; Cse_sc015964.1_g020.1
GO:0003935	GTP cyclohydrolase II activity	molecular_function	3	6179	4	55481	0.000153717	0.001190334	6.734220748	Cse_sc002966.1_g010.1; Cse_sc007492.1_g020.1; Cse_sc010886.1_g040.1
GO:0005354	galactose transmembrane transporter activity	molecular_function	3	6179	4	55481	0.000153717	0.001190334	6.734220748	Cse_sc014651.1_g010.1; Cse_sc014651.1_g020.1; Cse_sc014651.1_g030.1
GO:0005365	myo-inositol transmembrane transporter activity	molecular_function	3	6179	4	55481	0.000153717	0.001190334	6.734220748	Cse_sc014651.1_g010.1; Cse_sc014651.1_g020.1; Cse_sc014651.1_g030.1
GO:0015148	D-xylose transmembrane transporter activity	molecular_function	3	6179	4	55481	0.000153717	0.001190334	6.734220748	Cse_sc014651.1_g010.1; Cse_sc014651.1_g020.1; Cse_sc014651.1_g030.1
GO:0015575	mannitol transmembrane transporter activity	molecular_function	3	6179	4	55481	0.000153717	0.001190334	6.734220748	Cse_sc014651.1_g010.1; Cse_sc014651.1_g020.1; Cse_sc014651.1_g030.1
GO:0015576	sorbitol transmembrane transporter activity	molecular_function	3	6179	4	55481	0.000153717	0.001190334	6.734220748	Cse_sc014651.1_g010.1; Cse_sc014651.1_g020.1; Cse_sc014651.1_g030.1
GO:0015591	D-ribose transmembrane transporter activity	molecular_function	3	6179	4	55481	0.000153717	0.001190334	6.734220748	Cse_sc014651.1_g010.1; Cse_sc014651.1_g020.1; Cse_sc014651.1_g030.1
GO:0006508	proteolysis	biological_process	45	6179	239	55481	0.000156829	0.001212084	1.690599351	Cse_sc000147.1_g030.1; Cse_sc000161.1_g030.1; Cse_sc000246.1_g140.1; Cse_sc001189.1_g070.1; Cse_sc001245.1_g020.1; Cse_sc001348.1_g030.1; Cse_sc001926.1_g030.1; Cse_sc001952.1_g010.1; Cse_sc002103.1_g050.1; Cse_sc002103.1_g060.1; Cse_sc003156.1_g040.1; Cse_sc003329.1_g030.1; Cse_sc004105.1_g020.1; Cse_sc004146.1_g020.1; Cse_sc004404.1_g010.1; Cse_sc005064.1_g020.1; Cse_sc006634.1_g010.1; Cse_sc00…
GO:0019904	protein domain specific binding	molecular_function	30	6179	141	55481	0.000158017	0.0012189	1.910417233	Cse_sc000315.1_g040.1; Cse_sc000699.1_g050.1; Cse_sc001094.1_g010.1; Cse_sc001105.1_g050.1; Cse_sc001748.1_g060.1; Cse_sc002276.1_g040.1; Cse_sc003016.1_g040.1; Cse_sc004230.1_g030.1; Cse_sc005984.1_g020.1; Cse_sc008091.1_g010.1; Cse_sc008204.1_g060.1; Cse_sc008237.1_g050.1; Cse_sc009358.1_g040.1; Cse_sc010527.1_g060.1; Cse_sc011307.1_g020.1; Cse_sc011617.1_g010.1; Cse_sc011749.1_g020.1; Cse_sc01…
GO:0000325	plant-type vacuole	cellular_component	26	6179	117	55481	0.000176237	0.001356819	1.995324666	Cse_sc000037.1_g080.1; Cse_sc000138.1_g100.1; Cse_sc000296.1_g050.1; Cse_sc001291.1_g020.1; Cse_sc001434.1_g040.1; Cse_sc001972.1_g020.1; Cse_sc002354.1_g020.1; Cse_sc004159.1_g060.1; Cse_sc004397.1_g020.1; Cse_sc005780.1_g090.1; Cse_sc006330.1_g020.1; Cse_sc006641.1_g020.1; Cse_sc010291.1_g020.1; Cse_sc011688.1_g020.1; Cse_sc013648.1_g030.1; Cse_sc013661.1_g050.1; Cse_sc014702.1_g050.1; Cse_sc02…
GO:0005546	phosphatidylinositol-4,5-bisphosphate binding	molecular_function	11	6179	34	55481	0.000186222	0.00142544	2.90495797	Cse_sc000395.1_g030.1; Cse_sc001929.1_g020.1; Cse_sc002368.1_g030.1; Cse_sc002368.1_g090.1; Cse_sc005287.1_g030.1; Cse_sc005370.1_g020.1; Cse_sc007936.1_g020.1; Cse_sc016908.1_g020.1; Cse_sc022772.1_g030.1; Cse_sc025610.1_g010.1; Cse_sc030456.1_g030.1
GO:0030552	cAMP binding	molecular_function	11	6179	34	55481	0.000186222	0.00142544	2.90495797	Cse_sc000660.1_g020.1; Cse_sc000986.1_g060.1; Cse_sc008277.1_g010.1; Cse_sc017038.1_g030.1; Cse_sc020940.1_g030.1; Cse_sc023965.1_g010.1; Cse_sc031425.1_g010.1; Cse_sc039617.1_g010.1; Cse_sc043017.1_g020.1; Cse_sc059303.1_g010.1; Cse_sc124128.1_g010.1
GO:0030553	cGMP binding	molecular_function	11	6179	34	55481	0.000186222	0.00142544	2.90495797	Cse_sc000660.1_g020.1; Cse_sc000986.1_g060.1; Cse_sc008277.1_g010.1; Cse_sc017038.1_g030.1; Cse_sc020940.1_g030.1; Cse_sc023965.1_g010.1; Cse_sc031425.1_g010.1; Cse_sc039617.1_g010.1; Cse_sc043017.1_g020.1; Cse_sc059303.1_g010.1; Cse_sc124128.1_g010.1
GO:0009534	chloroplast thylakoid	cellular_component	41	6179	214	55481	0.000190404	0.00145442	1.720268228	Cse_sc000289.1_g060.1; Cse_sc000663.1_g110.1; Cse_sc000849.1_g050.1; Cse_sc001094.1_g010.1; Cse_sc001600.1_g070.1; Cse_sc001708.1_g010.1; Cse_sc002276.1_g040.1; Cse_sc002688.1_g090.1; Cse_sc004138.1_g060.1; Cse_sc004305.1_g010.1; Cse_sc004838.1_g040.1; Cse_sc005036.1_g060.1; Cse_sc005622.1_g030.1; Cse_sc005630.1_g010.1; Cse_sc006199.1_g020.1; Cse_sc006510.1_g020.1; Cse_sc007115.1_g040.1; Cse_sc00…
GO:0030245	cellulose catabolic process	biological_process	17	6179	65	55481	0.000190738	0.00145442	2.348343645	Cse_sc001642.1_g030.1; Cse_sc002171.1_g020.1; Cse_sc003233.1_g040.1; Cse_sc003466.1_g040.1; Cse_sc003850.1_g030.1; Cse_sc004495.1_g060.1; Cse_sc004884.1_g010.1; Cse_sc005565.1_g020.1; Cse_sc006852.1_g010.1; Cse_sc008524.1_g040.1; Cse_sc008612.1_g040.1; Cse_sc014712.1_g010.1; Cse_sc020475.1_g020.1; Cse_sc029082.1_g010.1; Cse_sc041082.1_g020.1; Cse_sc041154.1_g020.1; Cse_sc053877.1_g010.1
GO:0003006	developmental process involved in reproduction	biological_process	6	6179	13	55481	0.000197221	0.001498804	4.144135845	Cse_sc005102.1_g020.1; Cse_sc006257.1_g010.1; Cse_sc019393.1_g030.1; Cse_sc029995.1_g010.1; Cse_sc039828.1_g010.1; Cse_sc095205.1_g010.1
GO:0009851	auxin biosynthetic process	biological_process	13	6179	44	55481	0.00019731	0.001498804	2.65287484	Cse_sc000197.1_g020.1; Cse_sc000197.1_g040.1; Cse_sc000523.1_g080.1; Cse_sc000604.1_g050.1; Cse_sc001164.1_g040.1; Cse_sc001482.1_g030.1; Cse_sc005660.1_g020.1; Cse_sc006039.1_g010.1; Cse_sc007029.1_g030.1; Cse_sc018332.1_g020.1; Cse_sc018968.1_g020.1; Cse_sc024548.1_g020.1; Cse_sc031677.1_g020.1
GO:0009908	flower development	biological_process	74	6179	447	55481	0.000210333	0.001593311	1.486449919	Cse_sc000001.1_g050.1; Cse_sc000208.1_g060.1; Cse_sc000244.1_g130.1; Cse_sc000389.1_g020.1; Cse_sc000511.1_g050.1; Cse_sc001254.1_g140.1; Cse_sc001707.1_g050.1; Cse_sc001880.1_g070.1; Cse_sc002014.1_g040.1; Cse_sc002278.1_g030.1; Cse_sc002381.1_g060.1; Cse_sc002467.1_g050.1; Cse_sc003139.1_g020.1; Cse_sc003553.1_g040.1; Cse_sc003802.1_g060.1; Cse_sc003896.1_g030.1; Cse_sc004382.1_g020.1; Cse_sc00…
GO:0031418	L-ascorbic acid binding	molecular_function	16	6179	60	55481	0.00021055	0.001593311	2.394389599	Cse_sc000207.1_g020.1; Cse_sc001695.1_g050.1; Cse_sc002420.1_g070.1; Cse_sc004833.1_g070.1; Cse_sc008295.1_g050.1; Cse_sc008695.1_g010.1; Cse_sc008955.1_g030.1; Cse_sc009405.1_g040.1; Cse_sc014477.1_g010.1; Cse_sc014539.1_g030.1; Cse_sc027664.1_g010.1; Cse_sc041076.1_g010.1; Cse_sc043845.1_g010.1; Cse_sc043996.1_g010.1; Cse_sc045522.1_g020.1; Cse_sc059663.1_g010.1
GO:0000786	nucleosome	cellular_component	42	6179	222	55481	0.000217742	0.001644609	1.698722351	Cse_sc000092.1_g110.1; Cse_sc000269.1_g070.1; Cse_sc000556.1_g070.1; Cse_sc000695.1_g070.1; Cse_sc000936.1_g070.1; Cse_sc001780.1_g090.1; Cse_sc002077.1_g030.1; Cse_sc002623.1_g050.1; Cse_sc002820.1_g010.1; Cse_sc003659.1_g050.1; Cse_sc004091.1_g050.1; Cse_sc004621.1_g100.1; Cse_sc004821.1_g030.1; Cse_sc005695.1_g010.1; Cse_sc005766.1_g020.1; Cse_sc005877.1_g040.1; Cse_sc006057.1_g080.1; Cse_sc00…
GO:0005089	Rho guanyl-nucleotide exchange factor activity	molecular_function	8	6179	21	55481	0.000219279	0.001646862	3.42055657	Cse_sc000039.1_g050.1; Cse_sc000572.1_g040.1; Cse_sc001968.1_g040.1; Cse_sc003201.1_g050.1; Cse_sc004195.1_g010.1; Cse_sc011913.1_g020.1; Cse_sc018055.1_g030.1; Cse_sc046043.1_g010.1
GO:0004089	carbonate dehydratase activity	molecular_function	8	6179	21	55481	0.000219279	0.001646862	3.42055657	Cse_sc001805.1_g010.1; Cse_sc001805.1_g050.1; Cse_sc003348.1_g040.1; Cse_sc004569.1_g080.1; Cse_sc005657.1_g020.1; Cse_sc010286.1_g070.1; Cse_sc028390.1_g010.1; Cse_sc046865.1_g010.1
GO:0042409	caffeoyl-CoA O-methyltransferase activity	molecular_function	8	6179	21	55481	0.000219279	0.001646862	3.42055657	Cse_sc004366.1_g070.1; Cse_sc007418.1_g020.1; Cse_sc019952.1_g020.1; Cse_sc027148.1_g010.1; Cse_sc034153.1_g030.1; Cse_sc047493.1_g010.1; Cse_sc060126.1_g030.1; Cse_sc235480.1_g010.1
GO:0009831	plant-type cell wall modification involved in multidimensional cell growth	biological_process	7	6179	17	55481	0.000225777	0.001682988	3.697219234	Cse_sc000342.1_g030.1; Cse_sc001519.1_g040.1; Cse_sc002403.1_g020.1; Cse_sc013866.1_g010.1; Cse_sc018789.1_g020.1; Cse_sc023554.1_g010.1; Cse_sc037579.1_g020.1
GO:0048441	petal development	biological_process	7	6179	17	55481	0.000225777	0.001682988	3.697219234	Cse_sc001235.1_g010.1; Cse_sc002099.1_g030.1; Cse_sc004288.1_g020.1; Cse_sc005633.1_g050.1; Cse_sc013039.1_g020.1; Cse_sc020053.1_g010.1; Cse_sc025826.1_g020.1
GO:0005884	actin filament	cellular_component	7	6179	17	55481	0.000225777	0.001682988	3.697219234	Cse_sc001732.1_g030.1; Cse_sc003896.1_g060.1; Cse_sc012462.1_g030.1; Cse_sc014682.1_g030.1; Cse_sc023762.1_g010.1; Cse_sc027349.1_g020.1; Cse_sc061975.1_g020.1
GO:0000170	sphingosine hydroxylase activity	molecular_function	7	6179	17	55481	0.000225777	0.001682988	3.697219234	Cse_sc012616.1_g030.1; Cse_sc012616.1_g050.1; Cse_sc013657.1_g050.1; Cse_sc021766.1_g010.1; Cse_sc039178.1_g030.1; Cse_sc045487.1_g010.1; Cse_sc074162.1_g010.1
GO:0007623	circadian rhythm	biological_process	33	6179	163	55481	0.000228972	0.001703621	1.81782646	Cse_sc000001.1_g250.1; Cse_sc000626.1_g010.1; Cse_sc001345.1_g010.1; Cse_sc001664.1_g060.1; Cse_sc001687.1_g020.1; Cse_sc002142.1_g060.1; Cse_sc003802.1_g060.1; Cse_sc004241.1_g050.1; Cse_sc004583.1_g010.1; Cse_sc004717.1_g080.1; Cse_sc005732.1_g060.1; Cse_sc008261.1_g010.1; Cse_sc009583.1_g010.1; Cse_sc009962.1_g060.1; Cse_sc010865.1_g040.1; Cse_sc011262.1_g020.1; Cse_sc011416.1_g030.1; Cse_sc01…
GO:0019853	L-ascorbic acid biosynthetic process	biological_process	10	6179	30	55481	0.000233632	0.001731829	2.992986999	Cse_sc000005.1_g160.1; Cse_sc002658.1_g030.1; Cse_sc006385.1_g020.1; Cse_sc007770.1_g020.1; Cse_sc013813.1_g050.1; Cse_sc019986.1_g010.1; Cse_sc021169.1_g030.1; Cse_sc024599.1_g030.1; Cse_sc032042.1_g010.1; Cse_sc043213.1_g010.1
GO:0005543	phospholipid binding	molecular_function	10	6179	30	55481	0.000233632	0.001731829	2.992986999	Cse_sc000804.1_g010.1; Cse_sc001633.1_g100.1; Cse_sc002261.1_g060.1; Cse_sc007210.1_g040.1; Cse_sc010225.1_g030.1; Cse_sc010655.1_g030.1; Cse_sc015964.1_g020.1; Cse_sc021050.1_g010.1; Cse_sc023400.1_g010.1; Cse_sc049880.1_g010.1
GO:0016702	oxidoreductase activity, acting on single donors with incorporation of molecular oxygen, incorporation of two atoms of oxygen	molecular_function	14	6179	50	55481	0.000245629	0.001817382	2.514109079	Cse_sc001583.1_g020.1; Cse_sc004228.1_g050.1; Cse_sc006615.1_g020.1; Cse_sc008235.1_g010.1; Cse_sc010643.1_g060.1; Cse_sc012150.1_g030.1; Cse_sc012634.1_g010.1; Cse_sc012634.1_g020.1; Cse_sc015189.1_g010.1; Cse_sc020897.1_g020.1; Cse_sc020897.1_g050.1; Cse_sc030718.1_g010.1; Cse_sc033685.1_g010.1; Cse_sc040897.1_g010.1
GO:0045892	negative regulation of transcription, DNA-templated	biological_process	44	6179	237	55481	0.000251877	0.001860156	1.666980101	Cse_sc000067.1_g060.1; Cse_sc000244.1_g130.1; Cse_sc000577.1_g110.1; Cse_sc000775.1_g040.1; Cse_sc000885.1_g050.1; Cse_sc001139.1_g050.1; Cse_sc001296.1_g030.1; Cse_sc001609.1_g050.1; Cse_sc001794.1_g030.1; Cse_sc001808.1_g040.1; Cse_sc002278.1_g030.1; Cse_sc003214.1_g050.1; Cse_sc003573.1_g030.1; Cse_sc003688.1_g020.1; Cse_sc005107.1_g100.1; Cse_sc005135.1_g010.1; Cse_sc006546.1_g020.1; Cse_sc00…
GO:0008483	transaminase activity	molecular_function	11	6179	35	55481	0.000254796	0.001874769	2.82195917	Cse_sc000118.1_g090.1; Cse_sc000604.1_g050.1; Cse_sc003246.1_g010.1; Cse_sc004082.1_g010.1; Cse_sc004634.1_g020.1; Cse_sc005648.1_g050.1; Cse_sc006323.1_g010.1; Cse_sc007850.1_g020.1; Cse_sc013249.1_g010.1; Cse_sc018968.1_g020.1; Cse_sc052739.1_g010.1
GO:0046470	phosphatidylcholine metabolic process	biological_process	11	6179	35	55481	0.000254796	0.001874769	2.82195917	Cse_sc001462.1_g040.1; Cse_sc002368.1_g030.1; Cse_sc002368.1_g090.1; Cse_sc003011.1_g040.1; Cse_sc006257.1_g020.1; Cse_sc012662.1_g010.1; Cse_sc016134.1_g010.1; Cse_sc018127.1_g030.1; Cse_sc024226.1_g010.1; Cse_sc025144.1_g030.1; Cse_sc028728.1_g010.1
GO:0071456	cellular response to hypoxia	biological_process	12	6179	40	55481	0.00026144	0.001920113	2.693688299	Cse_sc001239.1_g050.1; Cse_sc004833.1_g070.1; Cse_sc006882.1_g040.1; Cse_sc008319.1_g020.1; Cse_sc009061.1_g030.1; Cse_sc010077.1_g020.1; Cse_sc010661.1_g040.1; Cse_sc012379.1_g010.1; Cse_sc014155.1_g010.1; Cse_sc024589.1_g020.1; Cse_sc030452.1_g010.1; Cse_sc034223.1_g020.1
GO:0009740	gibberellic acid mediated signaling pathway	biological_process	27	6179	126	55481	0.000265289	0.001944801	1.924063071	Cse_sc000028.1_g020.1; Cse_sc000473.1_g070.1; Cse_sc000641.1_g030.1; Cse_sc000732.1_g040.1; Cse_sc001102.1_g090.1; Cse_sc002467.1_g050.1; Cse_sc003139.1_g020.1; Cse_sc003687.1_g050.1; Cse_sc005660.1_g020.1; Cse_sc010048.1_g030.1; Cse_sc011262.1_g020.1; Cse_sc011381.1_g010.1; Cse_sc011605.1_g010.1; Cse_sc017818.1_g010.1; Cse_sc017818.1_g060.1; Cse_sc018600.1_g010.1; Cse_sc018737.1_g010.1; Cse_sc02…
GO:0030865	cortical cytoskeleton organization	biological_process	5	6179	10	55481	0.000268163	0.001951524	4.489480498	Cse_sc000221.1_g090.1; Cse_sc000700.1_g110.1; Cse_sc004509.1_g040.1; Cse_sc006014.1_g030.1; Cse_sc027801.1_g020.1
GO:0006081	cellular aldehyde metabolic process	biological_process	5	6179	10	55481	0.000268163	0.001951524	4.489480498	Cse_sc000844.1_g080.1; Cse_sc015187.1_g010.1; Cse_sc015187.1_g020.1; Cse_sc021254.1_g010.1; Cse_sc042098.1_g030.1
GO:0010115	regulation of abscisic acid biosynthetic process	biological_process	5	6179	10	55481	0.000268163	0.001951524	4.489480498	Cse_sc003410.1_g010.1; Cse_sc005117.1_g040.1; Cse_sc005913.1_g040.1; Cse_sc018182.1_g020.1; Cse_sc045750.1_g010.1
GO:0009410	response to xenobiotic stimulus	biological_process	5	6179	10	55481	0.000268163	0.001951524	4.489480498	Cse_sc009734.1_g010.1; Cse_sc011095.1_g020.1; Cse_sc015687.1_g020.1; Cse_sc016315.1_g030.1; Cse_sc031903.1_g030.1
GO:0009753	response to jasmonic acid	biological_process	71	6179	429	55481	0.000275022	0.00199779	1.48602851	Cse_sc000076.1_g020.1; Cse_sc000338.1_g080.1; Cse_sc000380.1_g060.1; Cse_sc000886.1_g010.1; Cse_sc001287.1_g110.1; Cse_sc001365.1_g020.1; Cse_sc001687.1_g020.1; Cse_sc001707.1_g050.1; Cse_sc001794.1_g030.1; Cse_sc002078.1_g070.1; Cse_sc002106.1_g040.1; Cse_sc002571.1_g060.1; Cse_sc002571.1_g110.1; Cse_sc002755.1_g100.1; Cse_sc003214.1_g050.1; Cse_sc003546.1_g070.1; Cse_sc003732.1_g060.1; Cse_sc00…
GO:0045486	naringenin 3-dioxygenase activity	molecular_function	4	6179	7	55481	0.000295838	0.002121946	5.130834855	Cse_sc000207.1_g020.1; Cse_sc004833.1_g070.1; Cse_sc008295.1_g050.1; Cse_sc045522.1_g020.1
GO:0010016	shoot system morphogenesis	biological_process	4	6179	7	55481	0.000295838	0.002121946	5.130834855	Cse_sc001808.1_g040.1; Cse_sc001845.1_g010.1; Cse_sc001845.1_g020.1; Cse_sc035017.1_g010.1
GO:0033818	beta-ketoacyl-acyl-carrier-protein synthase III activity	molecular_function	4	6179	7	55481	0.000295838	0.002121946	5.130834855	Cse_sc002257.1_g030.1; Cse_sc004762.1_g010.1; Cse_sc008113.1_g040.1; Cse_sc008557.1_g010.1
GO:0009821	alkaloid biosynthetic process	biological_process	4	6179	7	55481	0.000295838	0.002121946	5.130834855	Cse_sc003411.1_g030.1; Cse_sc014644.1_g010.1; Cse_sc016752.1_g030.1; Cse_sc025961.1_g030.1
GO:0090404	pollen tube tip	cellular_component	4	6179	7	55481	0.000295838	0.002121946	5.130834855	Cse_sc004563.1_g030.1; Cse_sc007244.1_g070.1; Cse_sc008356.1_g040.1; Cse_sc051168.1_g010.1
GO:0102978	furaneol oxidoreductase activity	molecular_function	4	6179	7	55481	0.000295838	0.002121946	5.130834855	Cse_sc004569.1_g090.1; Cse_sc015056.1_g030.1; Cse_sc038248.1_g020.1; Cse_sc045196.1_g010.1
GO:0047998	hyoscyamine (6S)-dioxygenase activity	molecular_function	4	6179	7	55481	0.000295838	0.002121946	5.130834855	Cse_sc027664.1_g010.1; Cse_sc041076.1_g010.1; Cse_sc043996.1_g010.1; Cse_sc059663.1_g010.1
GO:0030276	clathrin binding	molecular_function	14	6179	51	55481	0.00031242	0.002236859	2.464812823	Cse_sc001615.1_g080.1; Cse_sc002518.1_g030.1; Cse_sc003974.1_g010.1; Cse_sc008363.1_g030.1; Cse_sc008534.1_g030.1; Cse_sc009045.1_g020.1; Cse_sc014514.1_g030.1; Cse_sc015342.1_g020.1; Cse_sc020143.1_g020.1; Cse_sc034221.1_g020.1; Cse_sc036425.1_g010.1; Cse_sc037968.1_g020.1; Cse_sc046981.1_g020.1; Cse_sc050968.1_g020.1
GO:0016538	cyclin-dependent protein serine/threonine kinase regulator activity	molecular_function	13	6179	46	55481	0.000332166	0.002373974	2.537532456	Cse_sc000321.1_g080.1; Cse_sc003509.1_g050.1; Cse_sc003573.1_g020.1; Cse_sc003799.1_g080.1; Cse_sc004509.1_g020.1; Cse_sc009189.1_g040.1; Cse_sc009402.1_g020.1; Cse_sc010690.1_g020.1; Cse_sc012525.1_g030.1; Cse_sc014813.1_g020.1; Cse_sc028098.1_g020.1; Cse_sc035235.1_g010.1; Cse_sc035393.1_g020.1
GO:0009820	alkaloid metabolic process	biological_process	20	6179	85	55481	0.000333393	0.002377738	2.112696705	Cse_sc001094.1_g030.1; Cse_sc001949.1_g030.1; Cse_sc002842.1_g010.1; Cse_sc004000.1_g030.1; Cse_sc005773.1_g040.1; Cse_sc007353.1_g030.1; Cse_sc008113.1_g020.1; Cse_sc008113.1_g050.1; Cse_sc008413.1_g030.1; Cse_sc008649.1_g010.1; Cse_sc010418.1_g020.1; Cse_sc016321.1_g010.1; Cse_sc016705.1_g030.1; Cse_sc017998.1_g020.1; Cse_sc018566.1_g020.1; Cse_sc019998.1_g020.1; Cse_sc021316.1_g010.1; Cse_sc02…
GO:0009690	cytokinin metabolic process	biological_process	8	6179	22	55481	0.000334481	0.002377738	3.265076726	Cse_sc001445.1_g070.1; Cse_sc002742.1_g060.1; Cse_sc002742.1_g080.1; Cse_sc006117.1_g010.1; Cse_sc015414.1_g020.1; Cse_sc023112.1_g010.1; Cse_sc029362.1_g020.1; Cse_sc054657.1_g010.1
GO:0004301	epoxide hydrolase activity	molecular_function	8	6179	22	55481	0.000334481	0.002377738	3.265076726	Cse_sc010010.1_g040.1; Cse_sc012942.1_g060.1; Cse_sc020341.1_g020.1; Cse_sc021724.1_g020.1; Cse_sc028455.1_g010.1; Cse_sc029928.1_g040.1; Cse_sc038548.1_g010.1; Cse_sc044946.1_g020.1
GO:0006887	exocytosis	biological_process	23	6179	103	55481	0.000336984	0.002391269	2.005010708	Cse_sc000659.1_g050.1; Cse_sc001060.1_g030.1; Cse_sc001313.1_g010.1; Cse_sc001470.1_g080.1; Cse_sc002120.1_g040.1; Cse_sc002355.1_g030.1; Cse_sc002711.1_g040.1; Cse_sc004732.1_g040.1; Cse_sc004747.1_g020.1; Cse_sc007495.1_g020.1; Cse_sc008373.1_g020.1; Cse_sc010888.1_g010.1; Cse_sc012911.1_g020.1; Cse_sc014001.1_g020.1; Cse_sc016951.1_g020.1; Cse_sc021332.1_g010.1; Cse_sc021456.1_g020.1; Cse_sc02…
GO:0004315	3-oxoacyl-[acyl-carrier-protein] synthase activity	molecular_function	12	6179	41	55481	0.000344043	0.002437025	2.627988584	Cse_sc001614.1_g080.1; Cse_sc001934.1_g060.1; Cse_sc002257.1_g030.1; Cse_sc002389.1_g010.1; Cse_sc002389.1_g050.1; Cse_sc003577.1_g060.1; Cse_sc004571.1_g020.1; Cse_sc004762.1_g010.1; Cse_sc008113.1_g040.1; Cse_sc008557.1_g010.1; Cse_sc018227.1_g030.1; Cse_sc035570.1_g010.1
GO:0033897	ribonuclease T2 activity	molecular_function	6	6179	14	55481	0.000356452	0.002502697	3.848126142	Cse_sc000828.1_g110.1; Cse_sc003931.1_g070.1; Cse_sc011874.1_g030.1; Cse_sc018005.1_g010.1; Cse_sc028419.1_g030.1; Cse_sc029830.1_g040.1
GO:0007338	single fertilization	biological_process	6	6179	14	55481	0.000356452	0.002502697	3.848126142	Cse_sc001468.1_g030.1; Cse_sc001812.1_g070.1; Cse_sc005759.1_g020.1; Cse_sc019077.1_g010.1; Cse_sc034238.1_g010.1; Cse_sc056513.1_g020.1
GO:0016998	cell wall macromolecule catabolic process	biological_process	6	6179	14	55481	0.000356452	0.002502697	3.848126142	Cse_sc002466.1_g010.1; Cse_sc013547.1_g020.1; Cse_sc022438.1_g010.1; Cse_sc025905.1_g010.1; Cse_sc026496.1_g030.1; Cse_sc034606.1_g010.1
GO:0010158	abaxial cell fate specification	biological_process	6	6179	14	55481	0.000356452	0.002502697	3.848126142	Cse_sc004467.1_g060.1; Cse_sc006528.1_g010.1; Cse_sc007271.1_g010.1; Cse_sc011972.1_g050.1; Cse_sc023298.1_g020.1; Cse_sc029081.1_g010.1
GO:0043447	alkane biosynthetic process	biological_process	6	6179	14	55481	0.000356452	0.002502697	3.848126142	Cse_sc012616.1_g030.1; Cse_sc012616.1_g050.1; Cse_sc021766.1_g010.1; Cse_sc039178.1_g030.1; Cse_sc045487.1_g010.1; Cse_sc074162.1_g010.1
GO:0015171	amino acid transmembrane transporter activity	molecular_function	35	6179	180	55481	0.000360575	0.002527193	1.745909083	Cse_sc000817.1_g090.1; Cse_sc001457.1_g010.1; Cse_sc001582.1_g030.1; Cse_sc002728.1_g020.1; Cse_sc003135.1_g020.1; Cse_sc003197.1_g050.1; Cse_sc003351.1_g030.1; Cse_sc003687.1_g030.1; Cse_sc003940.1_g080.1; Cse_sc003945.1_g020.1; Cse_sc005789.1_g050.1; Cse_sc007079.1_g020.1; Cse_sc007079.1_g050.1; Cse_sc007753.1_g010.1; Cse_sc008877.1_g040.1; Cse_sc009923.1_g010.1; Cse_sc010432.1_g010.1; Cse_sc01…
GO:0002229	defense response to oomycetes	biological_process	18	6179	74	55481	0.00037274	0.002607869	2.184071594	Cse_sc003214.1_g050.1; Cse_sc003463.1_g030.1; Cse_sc003901.1_g050.1; Cse_sc004633.1_g030.1; Cse_sc004818.1_g060.1; Cse_sc005236.1_g020.1; Cse_sc008628.1_g030.1; Cse_sc008714.1_g010.1; Cse_sc010001.1_g020.1; Cse_sc013502.1_g010.1; Cse_sc019571.1_g010.1; Cse_sc023765.1_g020.1; Cse_sc024041.1_g010.1; Cse_sc028534.1_g010.1; Cse_sc036647.1_g010.1; Cse_sc036892.1_g010.1; Cse_sc041741.1_g020.1; Cse_sc04…
GO:0010252	auxin homeostasis	biological_process	19	6179	80	55481	0.000387008	0.002702955	2.132503237	Cse_sc000008.1_g080.1; Cse_sc000009.1_g010.1; Cse_sc000331.1_g010.1; Cse_sc000604.1_g050.1; Cse_sc001128.1_g030.1; Cse_sc001217.1_g070.1; Cse_sc001794.1_g030.1; Cse_sc003943.1_g020.1; Cse_sc004089.1_g020.1; Cse_sc005662.1_g040.1; Cse_sc007648.1_g030.1; Cse_sc014728.1_g060.1; Cse_sc015652.1_g010.1; Cse_sc018968.1_g020.1; Cse_sc021131.1_g020.1; Cse_sc021627.1_g010.1; Cse_sc028245.1_g020.1; Cse_sc04…
GO:0032147	activation of protein kinase activity	biological_process	20	6179	86	55481	0.000395328	0.002756238	2.088130464	Cse_sc000050.1_g230.1; Cse_sc000067.1_g030.1; Cse_sc000234.1_g010.1; Cse_sc000615.1_g030.1; Cse_sc000868.1_g040.1; Cse_sc000868.1_g060.1; Cse_sc001011.1_g060.1; Cse_sc001181.1_g010.1; Cse_sc001609.1_g030.1; Cse_sc002691.1_g020.1; Cse_sc002691.1_g030.1; Cse_sc004808.1_g010.1; Cse_sc006691.1_g020.1; Cse_sc011212.1_g030.1; Cse_sc015203.1_g030.1; Cse_sc017105.1_g030.1; Cse_sc019439.1_g010.1; Cse_sc01…
GO:0009699	phenylpropanoid biosynthetic process	biological_process	9	6179	27	55481	0.000408121	0.002830585	2.992986999	Cse_sc000257.1_g050.1; Cse_sc001363.1_g020.1; Cse_sc004060.1_g050.1; Cse_sc004555.1_g010.1; Cse_sc005557.1_g070.1; Cse_sc007378.1_g040.1; Cse_sc009521.1_g010.1; Cse_sc010378.1_g060.1; Cse_sc039071.1_g010.1
GO:0046688	response to copper ion	biological_process	9	6179	27	55481	0.000408121	0.002830585	2.992986999	Cse_sc003816.1_g070.1; Cse_sc004061.1_g020.1; Cse_sc004261.1_g020.1; Cse_sc017357.1_g010.1; Cse_sc019690.1_g010.1; Cse_sc020829.1_g020.1; Cse_sc022084.1_g010.1; Cse_sc032935.1_g010.1; Cse_sc077337.1_g010.1
GO:0006012	galactose metabolic process	biological_process	9	6179	27	55481	0.000408121	0.002830585	2.992986999	Cse_sc004144.1_g060.1; Cse_sc009298.1_g040.1; Cse_sc010957.1_g050.1; Cse_sc012414.1_g020.1; Cse_sc019346.1_g010.1; Cse_sc021787.1_g010.1; Cse_sc033847.1_g020.1; Cse_sc039349.1_g010.1; Cse_sc040448.1_g010.1
GO:0051225	spindle assembly	biological_process	12	6179	42	55481	0.000447839	0.00309529	2.565417428	Cse_sc000221.1_g090.1; Cse_sc000234.1_g010.1; Cse_sc000462.1_g140.1; Cse_sc001566.1_g050.1; Cse_sc004509.1_g040.1; Cse_sc004524.1_g040.1; Cse_sc004867.1_g030.1; Cse_sc005186.1_g070.1; Cse_sc010479.1_g020.1; Cse_sc015182.1_g040.1; Cse_sc020075.1_g020.1; Cse_sc021628.1_g030.1
GO:0007088	regulation of mitotic nuclear division	biological_process	12	6179	42	55481	0.000447839	0.00309529	2.565417428	Cse_sc000321.1_g080.1; Cse_sc003509.1_g050.1; Cse_sc003573.1_g020.1; Cse_sc003799.1_g080.1; Cse_sc004509.1_g020.1; Cse_sc009189.1_g040.1; Cse_sc009402.1_g020.1; Cse_sc010690.1_g020.1; Cse_sc012525.1_g030.1; Cse_sc014813.1_g020.1; Cse_sc028098.1_g020.1; Cse_sc035235.1_g010.1
GO:0015299	solute:proton antiporter activity	molecular_function	11	6179	37	55481	0.000457427	0.003150636	2.669420837	Cse_sc000001.1_g160.1; Cse_sc001553.1_g050.1; Cse_sc002471.1_g030.1; Cse_sc003204.1_g020.1; Cse_sc004544.1_g020.1; Cse_sc008487.1_g050.1; Cse_sc013668.1_g010.1; Cse_sc016455.1_g050.1; Cse_sc021775.1_g010.1; Cse_sc024337.1_g010.1; Cse_sc025595.1_g010.1
GO:0048831	regulation of shoot system development	biological_process	11	6179	37	55481	0.000457427	0.003150636	2.669420837	Cse_sc003924.1_g030.1; Cse_sc008007.1_g050.1; Cse_sc010602.1_g020.1; Cse_sc017818.1_g010.1; Cse_sc017818.1_g060.1; Cse_sc023003.1_g010.1; Cse_sc025584.1_g010.1; Cse_sc038290.1_g020.1; Cse_sc047590.1_g010.1; Cse_sc047590.1_g020.1; Cse_sc073221.1_g010.1
GO:0046274	lignin catabolic process	biological_process	21	6179	93	55481	0.000467707	0.003210356	2.027507322	Cse_sc003792.1_g020.1; Cse_sc003816.1_g070.1; Cse_sc004061.1_g020.1; Cse_sc004261.1_g020.1; Cse_sc005801.1_g010.1; Cse_sc006085.1_g010.1; Cse_sc007943.1_g020.1; Cse_sc007943.1_g030.1; Cse_sc009852.1_g020.1; Cse_sc015304.1_g040.1; Cse_sc017357.1_g010.1; Cse_sc018936.1_g030.1; Cse_sc019690.1_g010.1; Cse_sc020829.1_g020.1; Cse_sc022084.1_g010.1; Cse_sc024187.1_g030.1; Cse_sc025484.1_g020.1; Cse_sc03…
GO:0052716	hydroquinone:oxygen oxidoreductase activity	molecular_function	21	6179	93	55481	0.000467707	0.003210356	2.027507322	Cse_sc003792.1_g020.1; Cse_sc003816.1_g070.1; Cse_sc004061.1_g020.1; Cse_sc004261.1_g020.1; Cse_sc005801.1_g010.1; Cse_sc006085.1_g010.1; Cse_sc007943.1_g020.1; Cse_sc007943.1_g030.1; Cse_sc009852.1_g020.1; Cse_sc015304.1_g040.1; Cse_sc017357.1_g010.1; Cse_sc018936.1_g030.1; Cse_sc019690.1_g010.1; Cse_sc020829.1_g020.1; Cse_sc022084.1_g010.1; Cse_sc024187.1_g030.1; Cse_sc025484.1_g020.1; Cse_sc03…
GO:0006486	protein glycosylation	biological_process	37	6179	196	55481	0.000478393	0.003278063	1.695007943	Cse_sc000139.1_g090.1; Cse_sc000198.1_g050.1; Cse_sc000286.1_g040.1; Cse_sc000653.1_g060.1; Cse_sc002465.1_g050.1; Cse_sc002742.1_g060.1; Cse_sc002742.1_g080.1; Cse_sc003508.1_g060.1; Cse_sc003594.1_g040.1; Cse_sc004992.1_g030.1; Cse_sc007397.1_g070.1; Cse_sc010366.1_g020.1; Cse_sc010977.1_g040.1; Cse_sc011149.1_g020.1; Cse_sc012640.1_g040.1; Cse_sc013024.1_g040.1; Cse_sc013072.1_g020.1; Cse_sc01…
GO:0003333	amino acid transmembrane transport	biological_process	34	6179	176	55481	0.000481557	0.003294084	1.734572011	Cse_sc000817.1_g090.1; Cse_sc001457.1_g010.1; Cse_sc001582.1_g030.1; Cse_sc002728.1_g020.1; Cse_sc003135.1_g020.1; Cse_sc003197.1_g050.1; Cse_sc003351.1_g030.1; Cse_sc003687.1_g030.1; Cse_sc003940.1_g080.1; Cse_sc003945.1_g020.1; Cse_sc005789.1_g050.1; Cse_sc007079.1_g020.1; Cse_sc007079.1_g050.1; Cse_sc007753.1_g010.1; Cse_sc008877.1_g040.1; Cse_sc009923.1_g010.1; Cse_sc010432.1_g010.1; Cse_sc01…
GO:0030976	thiamine pyrophosphate binding	molecular_function	8	6179	23	55481	0.000495373	0.003382787	3.123116868	Cse_sc000206.1_g080.1; Cse_sc001094.1_g110.1; Cse_sc008424.1_g020.1; Cse_sc016830.1_g010.1; Cse_sc017761.1_g010.1; Cse_sc026710.1_g010.1; Cse_sc058821.1_g010.1; Cse_sc061066.1_g020.1
GO:0004842	ubiquitin-protein transferase activity	molecular_function	76	6179	475	55481	0.000508122	0.003463917	1.43663376	Cse_sc000047.1_g010.1; Cse_sc000132.1_g010.1; Cse_sc000264.1_g050.1; Cse_sc000470.1_g030.1; Cse_sc000503.1_g090.1; Cse_sc000779.1_g090.1; Cse_sc000812.1_g100.1; Cse_sc000997.1_g080.1; Cse_sc001211.1_g010.1; Cse_sc001290.1_g070.1; Cse_sc001328.1_g030.1; Cse_sc001346.1_g070.1; Cse_sc001416.1_g010.1; Cse_sc001445.1_g070.1; Cse_sc001617.1_g070.1; Cse_sc001698.1_g010.1; Cse_sc001714.1_g090.1; Cse_sc00…
GO:0009686	gibberellin biosynthetic process	biological_process	17	6179	70	55481	0.000515536	0.003508463	2.180604814	Cse_sc000608.1_g040.1; Cse_sc002381.1_g060.1; Cse_sc002467.1_g050.1; Cse_sc002577.1_g070.1; Cse_sc003687.1_g050.1; Cse_sc005323.1_g040.1; Cse_sc006089.1_g020.1; Cse_sc009495.1_g030.1; Cse_sc009943.1_g040.1; Cse_sc010048.1_g030.1; Cse_sc011052.1_g010.1; Cse_sc014401.1_g020.1; Cse_sc017354.1_g020.1; Cse_sc018600.1_g010.1; Cse_sc019061.1_g030.1; Cse_sc024695.1_g010.1; Cse_sc028766.1_g020.1
GO:2000033	regulation of seed dormancy process	biological_process	5	6179	11	55481	0.000534195	0.003610795	4.081345908	Cse_sc000641.1_g030.1; Cse_sc017707.1_g040.1; Cse_sc032611.1_g020.1; Cse_sc033112.1_g010.1; Cse_sc054260.1_g010.1
GO:0009051	pentose-phosphate shunt, oxidative branch	biological_process	5	6179	11	55481	0.000534195	0.003610795	4.081345908	Cse_sc001499.1_g040.1; Cse_sc001499.1_g080.1; Cse_sc002174.1_g010.1; Cse_sc002485.1_g010.1; Cse_sc008628.1_g030.1
GO:0047714	galactolipase activity	molecular_function	5	6179	11	55481	0.000534195	0.003610795	4.081345908	Cse_sc010384.1_g080.1; Cse_sc014872.1_g010.1; Cse_sc022020.1_g020.1; Cse_sc022347.1_g020.1; Cse_sc031779.1_g010.1
GO:0010023	proanthocyanidin biosynthetic process	biological_process	5	6179	11	55481	0.000534195	0.003610795	4.081345908	Cse_sc017357.1_g010.1; Cse_sc019690.1_g010.1; Cse_sc022084.1_g010.1; Cse_sc032935.1_g010.1; Cse_sc077337.1_g010.1
GO:0008810	cellulase activity	molecular_function	13	6179	48	55481	0.000539015	0.003637211	2.431801937	Cse_sc001642.1_g030.1; Cse_sc002171.1_g020.1; Cse_sc003233.1_g040.1; Cse_sc003466.1_g040.1; Cse_sc004495.1_g060.1; Cse_sc004884.1_g010.1; Cse_sc005565.1_g020.1; Cse_sc008612.1_g040.1; Cse_sc014712.1_g010.1; Cse_sc020475.1_g020.1; Cse_sc029082.1_g010.1; Cse_sc041082.1_g020.1; Cse_sc041154.1_g020.1
GO:0016114	terpenoid biosynthetic process	biological_process	35	6179	184	55481	0.000555489	0.003742044	1.707954537	Cse_sc000551.1_g060.1; Cse_sc001346.1_g010.1; Cse_sc001796.1_g070.1; Cse_sc002111.1_g020.1; Cse_sc002909.1_g010.1; Cse_sc003617.1_g020.1; Cse_sc005033.1_g020.1; Cse_sc006099.1_g030.1; Cse_sc008919.1_g010.1; Cse_sc009127.1_g020.1; Cse_sc010137.1_g010.1; Cse_sc010487.1_g020.1; Cse_sc010683.1_g010.1; Cse_sc012291.1_g020.1; Cse_sc013289.1_g050.1; Cse_sc013462.1_g010.1; Cse_sc013462.1_g020.1; Cse_sc01…
GO:0051693	actin filament capping	biological_process	7	6179	19	55481	0.000571739	0.003832594	3.308038262	Cse_sc002679.1_g040.1; Cse_sc002945.1_g030.1; Cse_sc003227.1_g040.1; Cse_sc005651.1_g040.1; Cse_sc006082.1_g020.1; Cse_sc023762.1_g010.1; Cse_sc055663.1_g010.1
GO:0062034	L-pipecolic acid biosynthetic process	biological_process	7	6179	19	55481	0.000571739	0.003832594	3.308038262	Cse_sc006882.1_g040.1; Cse_sc007850.1_g020.1; Cse_sc009061.1_g030.1; Cse_sc010077.1_g020.1; Cse_sc010661.1_g040.1; Cse_sc014155.1_g010.1; Cse_sc024589.1_g020.1
GO:0043547	positive regulation of GTPase activity	biological_process	9	6179	28	55481	0.000571814	0.003832594	2.886094606	Cse_sc001633.1_g100.1; Cse_sc002261.1_g060.1; Cse_sc006030.1_g050.1; Cse_sc007210.1_g040.1; Cse_sc008692.1_g010.1; Cse_sc010225.1_g030.1; Cse_sc010655.1_g030.1; Cse_sc015964.1_g020.1; Cse_sc022014.1_g010.1
GO:0010205	photoinhibition	biological_process	12	6179	43	55481	0.000576991	0.003860807	2.505756557	Cse_sc000432.1_g030.1; Cse_sc001430.1_g100.1; Cse_sc002686.1_g030.1; Cse_sc003285.1_g010.1; Cse_sc005315.1_g010.1; Cse_sc007276.1_g060.1; Cse_sc024318.1_g030.1; Cse_sc025027.1_g020.1; Cse_sc026195.1_g020.1; Cse_sc039568.1_g010.1; Cse_sc069527.1_g010.1; Cse_sc069653.1_g010.1
GO:0005768	endosome	cellular_component	81	6179	515	55481	0.000600638	0.004008568	1.412224933	Cse_sc000006.1_g210.1; Cse_sc000015.1_g050.1; Cse_sc000044.1_g170.1; Cse_sc000052.1_g010.1; Cse_sc000123.1_g150.1; Cse_sc000183.1_g080.1; Cse_sc000243.1_g040.1; Cse_sc000286.1_g040.1; Cse_sc000358.1_g080.1; Cse_sc000409.1_g010.1; Cse_sc000430.1_g010.1; Cse_sc000528.1_g070.1; Cse_sc000553.1_g090.1; Cse_sc000570.1_g080.1; Cse_sc000655.1_g030.1; Cse_sc000666.1_g020.1; Cse_sc000936.1_g060.1; Cse_sc00…
GO:0055075	potassium ion homeostasis	biological_process	11	6179	38	55481	0.000601298	0.004008568	2.59917292	Cse_sc000197.1_g060.1; Cse_sc001041.1_g130.1; Cse_sc001138.1_g030.1; Cse_sc001274.1_g100.1; Cse_sc002036.1_g010.1; Cse_sc003315.1_g020.1; Cse_sc006708.1_g030.1; Cse_sc007981.1_g070.1; Cse_sc012338.1_g070.1; Cse_sc019056.1_g020.1; Cse_sc039399.1_g010.1
GO:0009902	chloroplast relocation	biological_process	6	6179	15	55481	0.0006041	0.004008568	3.591584399	Cse_sc000697.1_g060.1; Cse_sc000902.1_g080.1; Cse_sc028014.1_g030.1; Cse_sc031407.1_g010.1; Cse_sc033847.1_g010.1; Cse_sc039207.1_g010.1
GO:0050404	zeatin O-beta-D-xylosyltransferase activity	molecular_function	6	6179	15	55481	0.0006041	0.004008568	3.591584399	Cse_sc002742.1_g060.1; Cse_sc002742.1_g080.1; Cse_sc015414.1_g020.1; Cse_sc023112.1_g010.1; Cse_sc029362.1_g020.1; Cse_sc054657.1_g010.1
GO:0009635	response to herbicide	biological_process	6	6179	15	55481	0.0006041	0.004008568	3.591584399	Cse_sc002868.1_g020.1; Cse_sc008237.1_g050.1; Cse_sc029550.1_g020.1; Cse_sc042061.1_g010.1; Cse_sc058821.1_g010.1; Cse_sc061066.1_g020.1
GO:0005871	kinesin complex	cellular_component	26	6179	126	55481	0.000618949	0.004100278	1.852801476	Cse_sc000026.1_g020.1; Cse_sc000257.1_g110.1; Cse_sc000488.1_g080.1; Cse_sc000971.1_g060.1; Cse_sc001566.1_g050.1; Cse_sc001841.1_g030.1; Cse_sc001907.1_g030.1; Cse_sc002347.1_g040.1; Cse_sc003182.1_g010.1; Cse_sc003353.1_g010.1; Cse_sc004867.1_g030.1; Cse_sc006497.1_g040.1; Cse_sc007677.1_g050.1; Cse_sc008168.1_g020.1; Cse_sc010479.1_g020.1; Cse_sc010615.1_g020.1; Cse_sc011079.1_g010.1; Cse_sc01…
GO:0048510	regulation of timing of transition from vegetative to reproductive phase	biological_process	18	6179	77	55481	0.000637271	0.004214656	2.098977895	Cse_sc000118.1_g010.1; Cse_sc000608.1_g040.1; Cse_sc001465.1_g080.1; Cse_sc001783.1_g060.1; Cse_sc002577.1_g070.1; Cse_sc004583.1_g010.1; Cse_sc005536.1_g070.1; Cse_sc006366.1_g010.1; Cse_sc006955.1_g020.1; Cse_sc009495.1_g030.1; Cse_sc009863.1_g010.1; Cse_sc011651.1_g020.1; Cse_sc013634.1_g020.1; Cse_sc019061.1_g030.1; Cse_sc024695.1_g010.1; Cse_sc024916.1_g020.1; Cse_sc028766.1_g020.1; Cse_sc03…
GO:0071281	cellular response to iron ion	biological_process	15	6179	60	55481	0.000671988	0.004436901	2.244740249	Cse_sc000608.1_g040.1; Cse_sc002577.1_g070.1; Cse_sc005287.1_g030.1; Cse_sc006852.1_g010.1; Cse_sc009495.1_g030.1; Cse_sc014477.1_g010.1; Cse_sc018830.1_g010.1; Cse_sc019061.1_g030.1; Cse_sc020936.1_g020.1; Cse_sc021232.1_g010.1; Cse_sc024695.1_g010.1; Cse_sc026558.1_g060.1; Cse_sc028766.1_g020.1; Cse_sc030456.1_g030.1; Cse_sc034806.1_g010.1
GO:0000307	cyclin-dependent protein kinase holoenzyme complex	cellular_component	13	6179	49	55481	0.000678012	0.004460342	2.382173326	Cse_sc000321.1_g080.1; Cse_sc003509.1_g050.1; Cse_sc003573.1_g020.1; Cse_sc003799.1_g080.1; Cse_sc004509.1_g020.1; Cse_sc009189.1_g040.1; Cse_sc009402.1_g020.1; Cse_sc010690.1_g020.1; Cse_sc012525.1_g030.1; Cse_sc014813.1_g020.1; Cse_sc028098.1_g020.1; Cse_sc035235.1_g010.1; Cse_sc035393.1_g020.1
GO:0007141	male meiosis I	biological_process	13	6179	49	55481	0.000678012	0.004460342	2.382173326	Cse_sc001288.1_g100.1; Cse_sc001399.1_g060.1; Cse_sc002392.1_g030.1; Cse_sc002457.1_g030.1; Cse_sc002838.1_g030.1; Cse_sc006511.1_g010.1; Cse_sc008563.1_g060.1; Cse_sc009633.1_g060.1; Cse_sc010622.1_g020.1; Cse_sc012815.1_g020.1; Cse_sc021074.1_g010.1; Cse_sc046746.1_g010.1; Cse_sc082587.1_g010.1
GO:0016846	carbon-sulfur lyase activity	molecular_function	3	6179	5	55481	0.000700144	0.004460342	5.387376598	Cse_sc000118.1_g090.1; Cse_sc006039.1_g010.1; Cse_sc006323.1_g010.1
GO:0015696	ammonium transport	biological_process	3	6179	5	55481	0.000700144	0.004460342	5.387376598	Cse_sc000913.1_g050.1; Cse_sc002835.1_g060.1; Cse_sc016337.1_g030.1
GO:0006206	pyrimidine nucleobase metabolic process	biological_process	3	6179	5	55481	0.000700144	0.004460342	5.387376598	Cse_sc001112.1_g050.1; Cse_sc009511.1_g060.1; Cse_sc020457.1_g010.1
GO:0008252	nucleotidase activity	molecular_function	3	6179	5	55481	0.000700144	0.004460342	5.387376598	Cse_sc001112.1_g050.1; Cse_sc009511.1_g060.1; Cse_sc020457.1_g010.1
GO:0008253	5'-nucleotidase activity	molecular_function	3	6179	5	55481	0.000700144	0.004460342	5.387376598	Cse_sc001112.1_g050.1; Cse_sc009511.1_g060.1; Cse_sc020457.1_g010.1
GO:0009166	nucleotide catabolic process	biological_process	3	6179	5	55481	0.000700144	0.004460342	5.387376598	Cse_sc001112.1_g050.1; Cse_sc009511.1_g060.1; Cse_sc020457.1_g010.1
GO:0008569	ATP-dependent microtubule motor activity, minus-end-directed	molecular_function	3	6179	5	55481	0.000700144	0.004460342	5.387376598	Cse_sc001566.1_g050.1; Cse_sc010479.1_g020.1; Cse_sc010615.1_g020.1
GO:2000122	negative regulation of stomatal complex development	biological_process	3	6179	5	55481	0.000700144	0.004460342	5.387376598	Cse_sc001758.1_g060.1; Cse_sc010544.1_g050.1; Cse_sc017754.1_g030.1
GO:0009590	detection of gravity	biological_process	3	6179	5	55481	0.000700144	0.004460342	5.387376598	Cse_sc002278.1_g010.1; Cse_sc020866.1_g030.1; Cse_sc029495.1_g030.1
GO:0008686	3,4-dihydroxy-2-butanone-4-phosphate synthase activity	molecular_function	3	6179	5	55481	0.000700144	0.004460342	5.387376598	Cse_sc002966.1_g010.1; Cse_sc007492.1_g020.1; Cse_sc010886.1_g040.1
GO:0071368	cellular response to cytokinin stimulus	biological_process	3	6179	5	55481	0.000700144	0.004460342	5.387376598	Cse_sc004141.1_g040.1; Cse_sc007911.1_g010.1; Cse_sc008501.1_g030.1
GO:0051511	negative regulation of unidimensional cell growth	biological_process	3	6179	5	55481	0.000700144	0.004460342	5.387376598	Cse_sc005287.1_g030.1; Cse_sc012504.1_g020.1; Cse_sc030456.1_g030.1
GO:0012506	vesicle membrane	cellular_component	3	6179	5	55481	0.000700144	0.004460342	5.387376598	Cse_sc005662.1_g040.1; Cse_sc035985.1_g010.1; Cse_sc046383.1_g010.1
GO:0006212	uracil catabolic process	biological_process	3	6179	5	55481	0.000700144	0.004460342	5.387376598	Cse_sc006206.1_g020.1; Cse_sc019442.1_g040.1; Cse_sc020451.1_g020.1
GO:0010230	alternative respiration	biological_process	3	6179	5	55481	0.000700144	0.004460342	5.387376598	Cse_sc006766.1_g040.1; Cse_sc006766.1_g090.1; Cse_sc014765.1_g010.1
GO:0046964	3'-phosphoadenosine 5'-phosphosulfate transmembrane transporter activity	molecular_function	3	6179	5	55481	0.000700144	0.004460342	5.387376598	Cse_sc007000.1_g050.1; Cse_sc007713.1_g060.1; Cse_sc015631.1_g020.1
GO:0052692	raffinose alpha-galactosidase activity	molecular_function	3	6179	5	55481	0.000700144	0.004460342	5.387376598	Cse_sc009352.1_g050.1; Cse_sc016815.1_g030.1; Cse_sc023011.1_g010.1
GO:0102549	1-18:1-2-16:0-monogalactosyldiacylglycerol lipase activity	molecular_function	3	6179	5	55481	0.000700144	0.004460342	5.387376598	Cse_sc010384.1_g080.1; Cse_sc022347.1_g020.1; Cse_sc031779.1_g010.1
GO:0047913	gallate 1-beta-glucosyltransferase activity	molecular_function	3	6179	5	55481	0.000700144	0.004460342	5.387376598	Cse_sc011952.1_g010.1; Cse_sc018583.1_g010.1; Cse_sc057556.1_g010.1
GO:0051639	actin filament network formation	biological_process	3	6179	5	55481	0.000700144	0.004460342	5.387376598	Cse_sc012462.1_g030.1; Cse_sc014682.1_g030.1; Cse_sc027349.1_g020.1
GO:0010268	brassinosteroid homeostasis	biological_process	8	6179	24	55481	0.000714627	0.004490675	2.992986999	Cse_sc000091.1_g010.1; Cse_sc001235.1_g010.1; Cse_sc001820.1_g080.1; Cse_sc006089.1_g020.1; Cse_sc012043.1_g010.1; Cse_sc012710.1_g050.1; Cse_sc016526.1_g010.1; Cse_sc025826.1_g020.1
GO:0010430	fatty acid omega-oxidation	biological_process	8	6179	24	55481	0.000714627	0.004490675	2.992986999	Cse_sc000208.1_g100.1; Cse_sc002266.1_g010.1; Cse_sc008109.1_g020.1; Cse_sc008242.1_g030.1; Cse_sc008800.1_g010.1; Cse_sc014643.1_g010.1; Cse_sc018918.1_g020.1; Cse_sc019442.1_g020.1
GO:0008574	ATP-dependent microtubule motor activity, plus-end-directed	molecular_function	8	6179	24	55481	0.000714627	0.004490675	2.992986999	Cse_sc001907.1_g030.1; Cse_sc006497.1_g040.1; Cse_sc007677.1_g050.1; Cse_sc008168.1_g020.1; Cse_sc011619.1_g010.1; Cse_sc017118.1_g030.1; Cse_sc017778.1_g040.1; Cse_sc035444.1_g020.1
GO:0045962	positive regulation of development, heterochronic	biological_process	4	6179	8	55481	0.000716166	0.004490675	4.489480498	Cse_sc000095.1_g140.1; Cse_sc008244.1_g060.1; Cse_sc018144.1_g020.1; Cse_sc041708.1_g010.1
GO:0010500	transmitting tissue development	biological_process	4	6179	8	55481	0.000716166	0.004490675	4.489480498	Cse_sc000501.1_g070.1; Cse_sc000866.1_g070.1; Cse_sc007362.1_g050.1; Cse_sc026072.1_g030.1
GO:0045544	gibberellin 20-oxidase activity	molecular_function	4	6179	8	55481	0.000716166	0.004490675	4.489480498	Cse_sc002381.1_g060.1; Cse_sc002467.1_g050.1; Cse_sc005323.1_g040.1; Cse_sc010048.1_g030.1
GO:0033356	UDP-L-arabinose metabolic process	biological_process	4	6179	8	55481	0.000716166	0.004490675	4.489480498	Cse_sc002862.1_g060.1; Cse_sc003766.1_g010.1; Cse_sc012398.1_g040.1; Cse_sc012628.1_g020.1
GO:0047216	inositol 3-alpha-galactosyltransferase activity	molecular_function	4	6179	8	55481	0.000716166	0.004490675	4.489480498	Cse_sc004144.1_g060.1; Cse_sc012414.1_g020.1; Cse_sc019346.1_g010.1; Cse_sc040448.1_g010.1
GO:0009819	drought recovery	biological_process	4	6179	8	55481	0.000716166	0.004490675	4.489480498	Cse_sc004614.1_g010.1; Cse_sc004614.1_g040.1; Cse_sc008442.1_g010.1; Cse_sc024250.1_g030.1
GO:0000224	peptide-N4-(N-acetyl-beta-glucosaminyl)asparagine amidase activity	molecular_function	4	6179	8	55481	0.000716166	0.004490675	4.489480498	Cse_sc019995.1_g010.1; Cse_sc026762.1_g020.1; Cse_sc038831.1_g040.1; Cse_sc065989.1_g010.1
GO:0031098	stress-activated protein kinase signaling cascade	biological_process	17	6179	72	55481	0.000741092	0.004639679	2.120032458	Cse_sc000050.1_g230.1; Cse_sc000067.1_g030.1; Cse_sc000615.1_g030.1; Cse_sc000868.1_g040.1; Cse_sc000868.1_g060.1; Cse_sc001011.1_g060.1; Cse_sc001181.1_g010.1; Cse_sc001609.1_g030.1; Cse_sc002691.1_g020.1; Cse_sc002691.1_g030.1; Cse_sc004808.1_g010.1; Cse_sc006691.1_g020.1; Cse_sc011212.1_g030.1; Cse_sc015203.1_g030.1; Cse_sc017105.1_g030.1; Cse_sc019439.1_g010.1; Cse_sc019439.1_g030.1
GO:0009620	response to fungus	biological_process	27	6179	134	55481	0.000755578	0.004722954	1.809193634	Cse_sc000187.1_g020.1; Cse_sc000244.1_g130.1; Cse_sc001274.1_g050.1; Cse_sc001293.1_g020.1; Cse_sc001293.1_g040.1; Cse_sc001690.1_g010.1; Cse_sc002278.1_g030.1; Cse_sc003548.1_g020.1; Cse_sc003901.1_g050.1; Cse_sc004118.1_g020.1; Cse_sc004818.1_g060.1; Cse_sc005236.1_g020.1; Cse_sc006194.1_g030.1; Cse_sc006533.1_g020.1; Cse_sc007448.1_g030.1; Cse_sc008373.1_g020.1; Cse_sc008377.1_g010.1; Cse_sc00…
GO:0042335	cuticle development	biological_process	14	6179	55	55481	0.000758198	0.004731899	2.285553708	Cse_sc001698.1_g010.1; Cse_sc005117.1_g040.1; Cse_sc008635.1_g020.1; Cse_sc008635.1_g030.1; Cse_sc008840.1_g030.1; Cse_sc013026.1_g030.1; Cse_sc018182.1_g020.1; Cse_sc019258.1_g010.1; Cse_sc020780.1_g020.1; Cse_sc021766.1_g010.1; Cse_sc033092.1_g020.1; Cse_sc039178.1_g030.1; Cse_sc045487.1_g010.1; Cse_sc074162.1_g010.1
GO:0009788	negative regulation of abscisic acid-activated signaling pathway	biological_process	19	6179	84	55481	0.000759382	0.004731899	2.030955464	Cse_sc002395.1_g020.1; Cse_sc003573.1_g030.1; Cse_sc003594.1_g030.1; Cse_sc003901.1_g050.1; Cse_sc004818.1_g060.1; Cse_sc005021.1_g050.1; Cse_sc006836.1_g040.1; Cse_sc011381.1_g010.1; Cse_sc016903.1_g010.1; Cse_sc017449.1_g010.1; Cse_sc018079.1_g020.1; Cse_sc018737.1_g010.1; Cse_sc019552.1_g020.1; Cse_sc024938.1_g030.1; Cse_sc028174.1_g010.1; Cse_sc028534.1_g010.1; Cse_sc031115.1_g020.1; Cse_sc03…
GO:0010380	regulation of chlorophyll biosynthetic process	biological_process	9	6179	29	55481	0.000786209	0.004891421	2.786574102	Cse_sc000001.1_g050.1; Cse_sc003410.1_g010.1; Cse_sc004141.1_g040.1; Cse_sc005913.1_g040.1; Cse_sc007911.1_g010.1; Cse_sc011262.1_g020.1; Cse_sc015414.1_g020.1; Cse_sc039562.1_g010.1; Cse_sc045750.1_g010.1
GO:0000278	mitotic cell cycle	biological_process	23	6179	109	55481	0.000806087	0.005007282	1.894643146	Cse_sc000234.1_g010.1; Cse_sc000321.1_g080.1; Cse_sc001476.1_g040.1; Cse_sc001986.1_g040.1; Cse_sc002422.1_g030.1; Cse_sc002781.1_g020.1; Cse_sc003509.1_g050.1; Cse_sc003573.1_g020.1; Cse_sc003799.1_g080.1; Cse_sc004509.1_g020.1; Cse_sc005186.1_g070.1; Cse_sc009189.1_g040.1; Cse_sc009402.1_g020.1; Cse_sc010054.1_g020.1; Cse_sc010690.1_g020.1; Cse_sc012525.1_g030.1; Cse_sc014286.1_g010.1; Cse_sc01…
GO:0009055	electron transfer activity	molecular_function	45	6179	257	55481	0.000826353	0.00512519	1.572191614	Cse_sc000089.1_g120.1; Cse_sc000699.1_g060.1; Cse_sc001777.1_g040.1; Cse_sc003104.1_g050.1; Cse_sc003276.1_g050.1; Cse_sc003522.1_g010.1; Cse_sc003889.1_g040.1; Cse_sc003980.1_g070.1; Cse_sc004013.1_g040.1; Cse_sc005001.1_g100.1; Cse_sc005001.1_g110.1; Cse_sc005905.1_g020.1; Cse_sc005905.1_g040.1; Cse_sc006273.1_g030.1; Cse_sc007059.1_g020.1; Cse_sc007262.1_g020.1; Cse_sc007686.1_g020.1; Cse_sc00…
GO:0051301	cell division	biological_process	75	6179	476	55481	0.000855325	0.005296637	1.414752258	Cse_sc000001.1_g250.1; Cse_sc000134.1_g080.1; Cse_sc000221.1_g090.1; Cse_sc000234.1_g010.1; Cse_sc000321.1_g080.1; Cse_sc000338.1_g030.1; Cse_sc000352.1_g030.1; Cse_sc000617.1_g130.1; Cse_sc000644.1_g060.1; Cse_sc001313.1_g010.1; Cse_sc001566.1_g050.1; Cse_sc001697.1_g060.1; Cse_sc002571.1_g070.1; Cse_sc002977.1_g040.1; Cse_sc003364.1_g070.1; Cse_sc003509.1_g050.1; Cse_sc003573.1_g020.1; Cse_sc00…
GO:0009718	anthocyanin-containing compound biosynthetic process	biological_process	20	6179	91	55481	0.000879018	0.005434921	1.973398021	Cse_sc000578.1_g060.1; Cse_sc004592.1_g010.1; Cse_sc004592.1_g040.1; Cse_sc005834.1_g050.1; Cse_sc007092.1_g070.1; Cse_sc008024.1_g030.1; Cse_sc008096.1_g030.1; Cse_sc008610.1_g020.1; Cse_sc008695.1_g010.1; Cse_sc009316.1_g020.1; Cse_sc011874.1_g030.1; Cse_sc014035.1_g020.1; Cse_sc015412.1_g060.1; Cse_sc022366.1_g040.1; Cse_sc026481.1_g040.1; Cse_sc028645.1_g010.1; Cse_sc040693.1_g020.1; Cse_sc05…
GO:0009744	response to sucrose	biological_process	24	6179	116	55481	0.000883563	0.005454563	1.857716068	Cse_sc000608.1_g040.1; Cse_sc000808.1_g040.1; Cse_sc001552.1_g070.1; Cse_sc001794.1_g030.1; Cse_sc002577.1_g070.1; Cse_sc003594.1_g030.1; Cse_sc007028.1_g010.1; Cse_sc007076.1_g020.1; Cse_sc007648.1_g030.1; Cse_sc008234.1_g020.1; Cse_sc009076.1_g040.1; Cse_sc009495.1_g030.1; Cse_sc014271.1_g020.1; Cse_sc014813.1_g020.1; Cse_sc018863.1_g040.1; Cse_sc019061.1_g030.1; Cse_sc020759.1_g010.1; Cse_sc02…
GO:0016787	hydrolase activity	molecular_function	44	6179	251	55481	0.000901818	0.005558653	1.574001131	Cse_sc000788.1_g050.1; Cse_sc000939.1_g040.1; Cse_sc000944.1_g040.1; Cse_sc000978.1_g050.1; Cse_sc001052.1_g070.1; Cse_sc001224.1_g010.1; Cse_sc001898.1_g010.1; Cse_sc003183.1_g010.1; Cse_sc003889.1_g050.1; Cse_sc004492.1_g020.1; Cse_sc004621.1_g080.1; Cse_sc004955.1_g070.1; Cse_sc005117.1_g040.1; Cse_sc005145.1_g020.1; Cse_sc005931.1_g030.1; Cse_sc006385.1_g020.1; Cse_sc006483.1_g020.1; Cse_sc00…
GO:0000148	1,3-beta-D-glucan synthase complex	cellular_component	12	6179	45	55481	0.000930791	0.005710762	2.394389599	Cse_sc000805.1_g070.1; Cse_sc001713.1_g030.1; Cse_sc002399.1_g050.1; Cse_sc003456.1_g030.1; Cse_sc005503.1_g050.1; Cse_sc005732.1_g060.1; Cse_sc006606.1_g040.1; Cse_sc009315.1_g020.1; Cse_sc009429.1_g020.1; Cse_sc010730.1_g050.1; Cse_sc042925.1_g020.1; Cse_sc051184.1_g010.1
GO:0003843	1,3-beta-D-glucan synthase activity	molecular_function	12	6179	45	55481	0.000930791	0.005710762	2.394389599	Cse_sc000805.1_g070.1; Cse_sc001713.1_g030.1; Cse_sc002399.1_g050.1; Cse_sc003456.1_g030.1; Cse_sc005503.1_g050.1; Cse_sc005732.1_g060.1; Cse_sc006606.1_g040.1; Cse_sc009315.1_g020.1; Cse_sc009429.1_g020.1; Cse_sc010730.1_g050.1; Cse_sc042925.1_g020.1; Cse_sc051184.1_g010.1
GO:0006075	(1->3)-beta-D-glucan biosynthetic process	biological_process	12	6179	45	55481	0.000930791	0.005710762	2.394389599	Cse_sc000805.1_g070.1; Cse_sc001713.1_g030.1; Cse_sc002399.1_g050.1; Cse_sc003456.1_g030.1; Cse_sc005503.1_g050.1; Cse_sc005732.1_g060.1; Cse_sc006606.1_g040.1; Cse_sc009315.1_g020.1; Cse_sc009429.1_g020.1; Cse_sc010730.1_g050.1; Cse_sc042925.1_g020.1; Cse_sc051184.1_g010.1
GO:0051980	iron-nicotianamine transmembrane transporter activity	molecular_function	5	6179	12	55481	0.000967643	0.00589348	3.741233749	Cse_sc005102.1_g020.1; Cse_sc019393.1_g030.1; Cse_sc029995.1_g010.1; Cse_sc039828.1_g010.1; Cse_sc095205.1_g010.1
GO:0006152	purine nucleoside catabolic process	biological_process	5	6179	12	55481	0.000967643	0.00589348	3.741233749	Cse_sc006527.1_g050.1; Cse_sc020412.1_g040.1; Cse_sc022934.1_g030.1; Cse_sc036356.1_g010.1; Cse_sc039481.1_g020.1
GO:0048317	seed morphogenesis	biological_process	6	6179	16	55481	0.000970917	0.00589348	3.367110374	Cse_sc000380.1_g060.1; Cse_sc002324.1_g010.1; Cse_sc017689.1_g010.1; Cse_sc017775.1_g020.1; Cse_sc038029.1_g010.1; Cse_sc041933.1_g010.1
GO:2000035	regulation of stem cell division	biological_process	6	6179	16	55481	0.000970917	0.00589348	3.367110374	Cse_sc000608.1_g040.1; Cse_sc002577.1_g070.1; Cse_sc009495.1_g030.1; Cse_sc019061.1_g030.1; Cse_sc024695.1_g010.1; Cse_sc028766.1_g020.1
GO:2000069	regulation of post-embryonic root development	biological_process	6	6179	16	55481	0.000970917	0.00589348	3.367110374	Cse_sc000608.1_g040.1; Cse_sc002577.1_g070.1; Cse_sc009495.1_g030.1; Cse_sc019061.1_g030.1; Cse_sc024695.1_g010.1; Cse_sc028766.1_g020.1
GO:0009970	cellular response to sulfate starvation	biological_process	6	6179	16	55481	0.000970917	0.00589348	3.367110374	Cse_sc000696.1_g030.1; Cse_sc005123.1_g020.1; Cse_sc008851.1_g030.1; Cse_sc011236.1_g020.1; Cse_sc021684.1_g030.1; Cse_sc026476.1_g020.1
GO:1902476	chloride transmembrane transport	biological_process	6	6179	16	55481	0.000970917	0.00589348	3.367110374	Cse_sc001138.1_g030.1; Cse_sc007981.1_g070.1; Cse_sc030850.1_g010.1; Cse_sc044001.1_g010.1; Cse_sc053024.1_g010.1; Cse_sc053024.1_g020.1
GO:0005544	calcium-dependent phospholipid binding	molecular_function	8	6179	25	55481	0.001006918	0.006093457	2.873267519	Cse_sc000804.1_g010.1; Cse_sc005592.1_g060.1; Cse_sc006510.1_g010.1; Cse_sc013426.1_g010.1; Cse_sc013991.1_g020.1; Cse_sc020870.1_g020.1; Cse_sc024256.1_g020.1; Cse_sc025061.1_g010.1
GO:0015116	sulfate transmembrane transporter activity	molecular_function	8	6179	25	55481	0.001006918	0.006093457	2.873267519	Cse_sc001103.1_g020.1; Cse_sc002045.1_g030.1; Cse_sc003030.1_g100.1; Cse_sc007547.1_g010.1; Cse_sc008692.1_g020.1; Cse_sc011236.1_g020.1; Cse_sc013491.1_g030.1; Cse_sc013536.1_g010.1
GO:0016413	O-acetyltransferase activity	molecular_function	17	6179	74	55481	0.001046372	0.006322626	2.062734283	Cse_sc001690.1_g010.1; Cse_sc004243.1_g040.1; Cse_sc004243.1_g080.1; Cse_sc004370.1_g020.1; Cse_sc004939.1_g050.1; Cse_sc006446.1_g020.1; Cse_sc007907.1_g020.1; Cse_sc008011.1_g010.1; Cse_sc009962.1_g060.1; Cse_sc012110.1_g010.1; Cse_sc013115.1_g050.1; Cse_sc015500.1_g020.1; Cse_sc023368.1_g030.1; Cse_sc026272.1_g020.1; Cse_sc037423.1_g020.1; Cse_sc040556.1_g020.1; Cse_sc041099.1_g020.1
GO:0009864	induced systemic resistance, jasmonic acid mediated signaling pathway	biological_process	10	6179	35	55481	0.001053764	0.006338476	2.565417428	Cse_sc000464.1_g040.1; Cse_sc002195.1_g040.1; Cse_sc003214.1_g050.1; Cse_sc008134.1_g050.1; Cse_sc012486.1_g010.1; Cse_sc014505.1_g010.1; Cse_sc017343.1_g010.1; Cse_sc018784.1_g010.1; Cse_sc025817.1_g020.1; Cse_sc036892.1_g010.1
GO:0016024	CDP-diacylglycerol biosynthetic process	biological_process	10	6179	35	55481	0.001053764	0.006338476	2.565417428	Cse_sc001304.1_g010.1; Cse_sc004643.1_g030.1; Cse_sc007477.1_g020.1; Cse_sc007625.1_g010.1; Cse_sc008323.1_g010.1; Cse_sc009515.1_g040.1; Cse_sc010368.1_g040.1; Cse_sc021053.1_g030.1; Cse_sc025295.1_g020.1; Cse_sc037009.1_g010.1
GO:1900425	negative regulation of defense response to bacterium	biological_process	10	6179	35	55481	0.001053764	0.006338476	2.565417428	Cse_sc001365.1_g020.1; Cse_sc007901.1_g100.1; Cse_sc009922.1_g020.1; Cse_sc010544.1_g050.1; Cse_sc011619.1_g020.1; Cse_sc015876.1_g030.1; Cse_sc017754.1_g030.1; Cse_sc030434.1_g010.1; Cse_sc042616.1_g010.1; Cse_sc052440.1_g020.1
GO:0016722	oxidoreductase activity, oxidizing metal ions	molecular_function	23	6179	111	55481	0.001055939	0.006341997	1.860505432	Cse_sc003792.1_g020.1; Cse_sc003816.1_g070.1; Cse_sc003933.1_g010.1; Cse_sc004061.1_g020.1; Cse_sc004261.1_g020.1; Cse_sc005801.1_g010.1; Cse_sc006085.1_g010.1; Cse_sc007943.1_g020.1; Cse_sc007943.1_g030.1; Cse_sc009852.1_g020.1; Cse_sc014834.1_g030.1; Cse_sc015304.1_g040.1; Cse_sc017357.1_g010.1; Cse_sc018936.1_g030.1; Cse_sc019690.1_g010.1; Cse_sc020829.1_g020.1; Cse_sc022084.1_g010.1; Cse_sc02…
GO:0008171	O-methyltransferase activity	molecular_function	9	6179	30	55481	0.001062497	0.006352683	2.693688299	Cse_sc000044.1_g140.1; Cse_sc002641.1_g040.1; Cse_sc005006.1_g020.1; Cse_sc005124.1_g020.1; Cse_sc005734.1_g020.1; Cse_sc016752.1_g030.1; Cse_sc025961.1_g030.1; Cse_sc029535.1_g010.1; Cse_sc052458.1_g010.1
GO:0102911	(-)-secoisolariciresinol dehydrogenase activity	molecular_function	9	6179	30	55481	0.001062497	0.006352683	2.693688299	Cse_sc000992.1_g060.1; Cse_sc001639.1_g060.1; Cse_sc009019.1_g010.1; Cse_sc027788.1_g010.1; Cse_sc028564.1_g010.1; Cse_sc036574.1_g020.1; Cse_sc040604.1_g020.1; Cse_sc050839.1_g010.1; Cse_sc062773.1_g010.1
GO:0015301	anion:anion antiporter activity	molecular_function	9	6179	30	55481	0.001062497	0.006352683	2.693688299	Cse_sc001103.1_g020.1; Cse_sc002045.1_g030.1; Cse_sc003030.1_g100.1; Cse_sc007547.1_g010.1; Cse_sc011236.1_g020.1; Cse_sc013536.1_g010.1; Cse_sc021869.1_g020.1; Cse_sc024619.1_g030.1; Cse_sc026384.1_g020.1
GO:0005764	lysosome	cellular_component	14	6179	57	55481	0.001133942	0.0067697	2.205358841	Cse_sc004397.1_g020.1; Cse_sc004512.1_g060.1; Cse_sc006303.1_g050.1; Cse_sc009540.1_g030.1; Cse_sc012831.1_g040.1; Cse_sc014702.1_g050.1; Cse_sc021231.1_g040.1; Cse_sc022039.1_g010.1; Cse_sc026530.1_g020.1; Cse_sc029706.1_g010.1; Cse_sc032311.1_g010.1; Cse_sc047401.1_g010.1; Cse_sc212026.1_g010.1; Cse_sc340121.1_g010.1
GO:0003777	microtubule motor activity	molecular_function	27	6179	138	55481	0.001216491	0.007240844	1.756753239	Cse_sc000026.1_g020.1; Cse_sc000257.1_g110.1; Cse_sc000488.1_g080.1; Cse_sc000971.1_g060.1; Cse_sc001566.1_g050.1; Cse_sc001841.1_g030.1; Cse_sc001907.1_g030.1; Cse_sc002347.1_g040.1; Cse_sc003182.1_g010.1; Cse_sc003353.1_g010.1; Cse_sc004867.1_g030.1; Cse_sc006497.1_g040.1; Cse_sc007677.1_g050.1; Cse_sc008168.1_g020.1; Cse_sc010479.1_g020.1; Cse_sc010615.1_g020.1; Cse_sc011079.1_g010.1; Cse_sc01…
GO:0007018	microtubule-based movement	biological_process	27	6179	138	55481	0.001216491	0.007240844	1.756753239	Cse_sc000026.1_g020.1; Cse_sc000257.1_g110.1; Cse_sc000488.1_g080.1; Cse_sc000971.1_g060.1; Cse_sc001566.1_g050.1; Cse_sc001841.1_g030.1; Cse_sc001907.1_g030.1; Cse_sc002347.1_g040.1; Cse_sc003182.1_g010.1; Cse_sc003353.1_g010.1; Cse_sc004867.1_g030.1; Cse_sc006497.1_g040.1; Cse_sc007677.1_g050.1; Cse_sc008168.1_g020.1; Cse_sc010479.1_g020.1; Cse_sc010615.1_g020.1; Cse_sc011079.1_g010.1; Cse_sc01…
GO:0009504	cell plate	cellular_component	17	6179	75	55481	0.001235444	0.0073427	2.035231159	Cse_sc000015.1_g050.1; Cse_sc000805.1_g070.1; Cse_sc001313.1_g010.1; Cse_sc002518.1_g030.1; Cse_sc005621.1_g040.1; Cse_sc006606.1_g040.1; Cse_sc008373.1_g020.1; Cse_sc008534.1_g030.1; Cse_sc008771.1_g020.1; Cse_sc014514.1_g030.1; Cse_sc015050.1_g020.1; Cse_sc021456.1_g020.1; Cse_sc021945.1_g030.1; Cse_sc022651.1_g020.1; Cse_sc024386.1_g010.1; Cse_sc034145.1_g020.1; Cse_sc036425.1_g010.1
GO:1902074	response to salt	biological_process	7	6179	21	55481	0.001254626	0.007412514	2.992986999	Cse_sc000151.1_g040.1; Cse_sc000244.1_g130.1; Cse_sc002278.1_g030.1; Cse_sc002309.1_g020.1; Cse_sc004343.1_g040.1; Cse_sc014271.1_g020.1; Cse_sc035023.1_g010.1
GO:0010336	gibberellic acid homeostasis	biological_process	7	6179	21	55481	0.001254626	0.007412514	2.992986999	Cse_sc000447.1_g040.1; Cse_sc000641.1_g030.1; Cse_sc001555.1_g070.1; Cse_sc005040.1_g040.1; Cse_sc006036.1_g010.1; Cse_sc010793.1_g020.1; Cse_sc056998.1_g010.1
GO:0008374	O-acyltransferase activity	molecular_function	7	6179	21	55481	0.001254626	0.007412514	2.992986999	Cse_sc000629.1_g050.1; Cse_sc003163.1_g060.1; Cse_sc005039.1_g020.1; Cse_sc009234.1_g010.1; Cse_sc019218.1_g030.1; Cse_sc035831.1_g050.1; Cse_sc065723.1_g020.1
GO:0090378	seed trichome elongation	biological_process	7	6179	21	55481	0.001254626	0.007412514	2.992986999	Cse_sc000834.1_g090.1; Cse_sc002006.1_g110.1; Cse_sc005296.1_g020.1; Cse_sc008556.1_g020.1; Cse_sc017552.1_g020.1; Cse_sc029934.1_g010.1; Cse_sc039150.1_g010.1
GO:2000024	regulation of leaf development	biological_process	11	6179	41	55481	0.001277145	0.00751161	2.408989536	Cse_sc000244.1_g130.1; Cse_sc000485.1_g060.1; Cse_sc002278.1_g030.1; Cse_sc006528.1_g010.1; Cse_sc007271.1_g010.1; Cse_sc011972.1_g050.1; Cse_sc017345.1_g020.1; Cse_sc020447.1_g050.1; Cse_sc023298.1_g020.1; Cse_sc029081.1_g010.1; Cse_sc030932.1_g010.1
GO:0030148	sphingolipid biosynthetic process	biological_process	11	6179	41	55481	0.001277145	0.00751161	2.408989536	Cse_sc003484.1_g030.1; Cse_sc003484.1_g050.1; Cse_sc012616.1_g030.1; Cse_sc012616.1_g050.1; Cse_sc013657.1_g050.1; Cse_sc021766.1_g010.1; Cse_sc021876.1_g010.1; Cse_sc028654.1_g020.1; Cse_sc039178.1_g030.1; Cse_sc045487.1_g010.1; Cse_sc074162.1_g010.1
GO:0030136	clathrin-coated vesicle	cellular_component	13	6179	52	55481	0.001289017	0.00751161	2.244740249	Cse_sc001615.1_g080.1; Cse_sc002518.1_g030.1; Cse_sc003974.1_g010.1; Cse_sc005410.1_g060.1; Cse_sc008534.1_g030.1; Cse_sc009045.1_g020.1; Cse_sc012784.1_g020.1; Cse_sc015342.1_g020.1; Cse_sc020143.1_g020.1; Cse_sc023400.1_g010.1; Cse_sc034221.1_g020.1; Cse_sc046981.1_g020.1; Cse_sc050968.1_g020.1
GO:0051753	mannan synthase activity	molecular_function	10	6179	36	55481	0.001366203	0.00751161	2.494155832	Cse_sc000170.1_g100.1; Cse_sc001753.1_g020.1; Cse_sc001759.1_g030.1; Cse_sc007079.1_g060.1; Cse_sc007214.1_g060.1; Cse_sc007936.1_g040.1; Cse_sc014044.1_g020.1; Cse_sc016488.1_g030.1; Cse_sc020401.1_g040.1; Cse_sc065881.1_g010.1
GO:0051453	regulation of intracellular pH	biological_process	14	6179	58	55481	0.001374029	0.00751161	2.167335413	Cse_sc000197.1_g060.1; Cse_sc001244.1_g090.1; Cse_sc002036.1_g010.1; Cse_sc002740.1_g080.1; Cse_sc005465.1_g020.1; Cse_sc006708.1_g030.1; Cse_sc009967.1_g010.1; Cse_sc021397.1_g010.1; Cse_sc021869.1_g020.1; Cse_sc022821.1_g010.1; Cse_sc024619.1_g030.1; Cse_sc026384.1_g020.1; Cse_sc126677.1_g010.1; Cse_sc202023.1_g010.1
GO:0046914	transition metal ion binding	molecular_function	2	6179	3	55481	0.001380811	0.00751161	5.985973998	Cse_sc000043.1_g030.1; Cse_sc010163.1_g010.1
GO:0046916	cellular transition metal ion homeostasis	biological_process	2	6179	3	55481	0.001380811	0.00751161	5.985973998	Cse_sc000043.1_g030.1; Cse_sc010163.1_g010.1
GO:0010413	glucuronoxylan metabolic process	biological_process	2	6179	3	55481	0.001380811	0.00751161	5.985973998	Cse_sc000080.1_g080.1; Cse_sc005205.1_g020.1
GO:0008886	glyceraldehyde-3-phosphate dehydrogenase (NADP+) (non-phosphorylating) activity	molecular_function	2	6179	3	55481	0.001380811	0.00751161	5.985973998	Cse_sc000132.1_g120.1; Cse_sc000266.1_g050.1
GO:1901347	negative regulation of secondary cell wall biogenesis	biological_process	2	6179	3	55481	0.001380811	0.00751161	5.985973998	Cse_sc000151.1_g040.1; Cse_sc004343.1_g040.1
GO:0004358	glutamate N-acetyltransferase activity	molecular_function	2	6179	3	55481	0.001380811	0.00751161	5.985973998	Cse_sc000155.1_g030.1; Cse_sc010695.1_g030.1
GO:0031110	regulation of microtubule polymerization or depolymerization	biological_process	2	6179	3	55481	0.001380811	0.00751161	5.985973998	Cse_sc000221.1_g090.1; Cse_sc004509.1_g040.1
GO:0035371	microtubule plus-end	cellular_component	2	6179	3	55481	0.001380811	0.00751161	5.985973998	Cse_sc000221.1_g090.1; Cse_sc004509.1_g040.1
GO:0035372	protein localization to microtubule	biological_process	2	6179	3	55481	0.001380811	0.00751161	5.985973998	Cse_sc000221.1_g090.1; Cse_sc004509.1_g040.1
GO:1904825	protein localization to microtubule plus-end	biological_process	2	6179	3	55481	0.001380811	0.00751161	5.985973998	Cse_sc000221.1_g090.1; Cse_sc004509.1_g040.1
GO:1990058	fruit replum development	biological_process	2	6179	3	55481	0.001380811	0.00751161	5.985973998	Cse_sc000501.1_g070.1; Cse_sc000866.1_g070.1
GO:0016651	oxidoreductase activity, acting on NAD(P)H	molecular_function	2	6179	3	55481	0.001380811	0.00751161	5.985973998	Cse_sc000827.1_g090.1; Cse_sc001627.1_g010.1
GO:0046488	phosphatidylinositol metabolic process	biological_process	2	6179	3	55481	0.001380811	0.00751161	5.985973998	Cse_sc000878.1_g020.1; Cse_sc004926.1_g060.1
GO:1901352	negative regulation of phosphatidylglycerol biosynthetic process	biological_process	2	6179	3	55481	0.001380811	0.00751161	5.985973998	Cse_sc000878.1_g020.1; Cse_sc001388.1_g070.1
GO:0034256	chlorophyll(ide) b reductase activity	molecular_function	2	6179	3	55481	0.001380811	0.00751161	5.985973998	Cse_sc001071.1_g030.1; Cse_sc004388.1_g010.1
GO:0046475	glycerophospholipid catabolic process	biological_process	2	6179	3	55481	0.001380811	0.00751161	5.985973998	Cse_sc001199.1_g020.1; Cse_sc008264.1_g020.1
GO:0009921	auxin efflux carrier complex	cellular_component	2	6179	3	55481	0.001380811	0.00751161	5.985973998	Cse_sc001217.1_g070.1; Cse_sc003943.1_g020.1
GO:0033095	aleurone grain	cellular_component	2	6179	3	55481	0.001380811	0.00751161	5.985973998	Cse_sc001318.1_g120.1; Cse_sc016749.1_g040.1
GO:0051507	beta-sitosterol UDP-glucosyltransferase activity	molecular_function	2	6179	3	55481	0.001380811	0.00751161	5.985973998	Cse_sc001347.1_g020.1; Cse_sc003952.1_g040.1
GO:0031957	very long-chain fatty acid-CoA ligase activity	molecular_function	2	6179	3	55481	0.001380811	0.00751161	5.985973998	Cse_sc001367.1_g030.1; Cse_sc015652.1_g020.1
GO:0071475	cellular hyperosmotic salinity response	biological_process	2	6179	3	55481	0.001380811	0.00751161	5.985973998	Cse_sc001845.1_g010.1; Cse_sc001845.1_g020.1
GO:0018454	acetoacetyl-CoA reductase activity	molecular_function	2	6179	3	55481	0.001380811	0.00751161	5.985973998	Cse_sc003566.1_g010.1; Cse_sc047023.1_g010.1
GO:0090602	sieve element enucleation	biological_process	2	6179	3	55481	0.001380811	0.00751161	5.985973998	Cse_sc004048.1_g040.1; Cse_sc011327.1_g030.1
GO:0042218	1-aminocyclopropane-1-carboxylate biosynthetic process	biological_process	2	6179	3	55481	0.001380811	0.00751161	5.985973998	Cse_sc004082.1_g010.1; Cse_sc004634.1_g020.1
GO:0031537	regulation of anthocyanin metabolic process	biological_process	2	6179	3	55481	0.001380811	0.00751161	5.985973998	Cse_sc004141.1_g040.1; Cse_sc007911.1_g010.1
GO:0000271	polysaccharide biosynthetic process	biological_process	2	6179	3	55481	0.001380811	0.00751161	5.985973998	Cse_sc004256.1_g050.1; Cse_sc020465.1_g030.1
GO:0048498	establishment of petal orientation	biological_process	2	6179	3	55481	0.001380811	0.00751161	5.985973998	Cse_sc004288.1_g020.1; Cse_sc005633.1_g050.1
GO:0090428	perianth development	biological_process	2	6179	3	55481	0.001380811	0.00751161	5.985973998	Cse_sc004288.1_g020.1; Cse_sc005633.1_g050.1
GO:0031520	plasma membrane of cell tip	cellular_component	2	6179	3	55481	0.001380811	0.00751161	5.985973998	Cse_sc004563.1_g030.1; Cse_sc007244.1_g070.1
GO:0043657	host cell	cellular_component	2	6179	3	55481	0.001380811	0.00751161	5.985973998	Cse_sc005287.1_g030.1; Cse_sc030456.1_g030.1
GO:0003849	3-deoxy-7-phosphoheptulonate synthase activity	molecular_function	2	6179	3	55481	0.001380811	0.00751161	5.985973998	Cse_sc006249.1_g040.1; Cse_sc011307.1_g040.1
GO:0001210	transcriptional repressor activity, metal ion regulated sequence-specific DNA binding	molecular_function	2	6179	3	55481	0.001380811	0.00751161	5.985973998	Cse_sc006955.1_g020.1; Cse_sc024916.1_g020.1
GO:0048531	beta-1,3-galactosyltransferase activity	molecular_function	2	6179	3	55481	0.001380811	0.00751161	5.985973998	Cse_sc007397.1_g070.1; Cse_sc013072.1_g020.1
GO:1905421	regulation of plant organ morphogenesis	biological_process	2	6179	3	55481	0.001380811	0.00751161	5.985973998	Cse_sc009533.1_g030.1; Cse_sc019248.1_g040.1
GO:0000798	nuclear cohesin complex	cellular_component	2	6179	3	55481	0.001380811	0.00751161	5.985973998	Cse_sc010054.1_g020.1; Cse_sc014286.1_g010.1
GO:0015085	calcium ion transmembrane transporter activity	molecular_function	2	6179	3	55481	0.001380811	0.00751161	5.985973998	Cse_sc010140.1_g050.1; Cse_sc030124.1_g010.1
GO:0006844	acyl carnitine transport	biological_process	2	6179	3	55481	0.001380811	0.00751161	5.985973998	Cse_sc010380.1_g020.1; Cse_sc016333.1_g010.1
GO:0090448	glucosinolate:proton symporter activity	molecular_function	2	6179	3	55481	0.001380811	0.00751161	5.985973998	Cse_sc010756.1_g040.1; Cse_sc024833.1_g040.1
GO:0090449	phloem glucosinolate loading	biological_process	2	6179	3	55481	0.001380811	0.00751161	5.985973998	Cse_sc010756.1_g040.1; Cse_sc024833.1_g040.1
GO:1901349	glucosinolate transport	biological_process	2	6179	3	55481	0.001380811	0.00751161	5.985973998	Cse_sc010756.1_g040.1; Cse_sc024833.1_g040.1
GO:0004839	ubiquitin activating enzyme activity	molecular_function	2	6179	3	55481	0.001380811	0.00751161	5.985973998	Cse_sc011350.1_g010.1; Cse_sc025259.1_g020.1
GO:0102098	D-galacturonate reductase activity	molecular_function	2	6179	3	55481	0.001380811	0.00751161	5.985973998	Cse_sc013813.1_g050.1; Cse_sc043213.1_g010.1
GO:0003941	L-serine ammonia-lyase activity	molecular_function	2	6179	3	55481	0.001380811	0.00751161	5.985973998	Cse_sc015198.1_g030.1; Cse_sc032650.1_g010.1
GO:0008721	D-serine ammonia-lyase activity	molecular_function	2	6179	3	55481	0.001380811	0.00751161	5.985973998	Cse_sc015198.1_g030.1; Cse_sc032650.1_g010.1
GO:0009069	serine family amino acid metabolic process	biological_process	2	6179	3	55481	0.001380811	0.00751161	5.985973998	Cse_sc015198.1_g030.1; Cse_sc032650.1_g010.1
GO:0018114	threonine racemase activity	molecular_function	2	6179	3	55481	0.001380811	0.00751161	5.985973998	Cse_sc015198.1_g030.1; Cse_sc032650.1_g010.1
GO:0030378	serine racemase activity	molecular_function	2	6179	3	55481	0.001380811	0.00751161	5.985973998	Cse_sc015198.1_g030.1; Cse_sc032650.1_g010.1
GO:0042866	pyruvate biosynthetic process	biological_process	2	6179	3	55481	0.001380811	0.00751161	5.985973998	Cse_sc015198.1_g030.1; Cse_sc032650.1_g010.1
GO:0070178	D-serine metabolic process	biological_process	2	6179	3	55481	0.001380811	0.00751161	5.985973998	Cse_sc015198.1_g030.1; Cse_sc032650.1_g010.1
GO:0070179	D-serine biosynthetic process	biological_process	2	6179	3	55481	0.001380811	0.00751161	5.985973998	Cse_sc015198.1_g030.1; Cse_sc032650.1_g010.1
GO:0008746	NAD(P)+ transhydrogenase activity	molecular_function	2	6179	3	55481	0.001380811	0.00751161	5.985973998	Cse_sc016906.1_g010.1; Cse_sc027501.1_g010.1
GO:0048576	positive regulation of short-day photoperiodism, flowering	biological_process	2	6179	3	55481	0.001380811	0.00751161	5.985973998	Cse_sc021704.1_g010.1; Cse_sc022197.1_g020.1
GO:0015774	polysaccharide transport	biological_process	2	6179	3	55481	0.001380811	0.00751161	5.985973998	Cse_sc024256.1_g020.1; Cse_sc025061.1_g010.1
GO:0005096	GTPase activator activity	molecular_function	25	6179	126	55481	0.001382528	0.00751161	1.78153988	Cse_sc000409.1_g010.1; Cse_sc001633.1_g100.1; Cse_sc002088.1_g020.1; Cse_sc002261.1_g060.1; Cse_sc003974.1_g010.1; Cse_sc004282.1_g030.1; Cse_sc005301.1_g030.1; Cse_sc006171.1_g050.1; Cse_sc006250.1_g040.1; Cse_sc006708.1_g010.1; Cse_sc007210.1_g040.1; Cse_sc008692.1_g010.1; Cse_sc008771.1_g020.1; Cse_sc010225.1_g030.1; Cse_sc010655.1_g030.1; Cse_sc011710.1_g030.1; Cse_sc012507.1_g010.1; Cse_sc01…
GO:0050829	defense response to Gram-negative bacterium	biological_process	8	6179	26	55481	0.001388933	0.007536145	2.76275723	Cse_sc000183.1_g080.1; Cse_sc000358.1_g080.1; Cse_sc003974.1_g010.1; Cse_sc005512.1_g040.1; Cse_sc008929.1_g010.1; Cse_sc021863.1_g020.1; Cse_sc047147.1_g010.1; Cse_sc062668.1_g010.1
GO:0009638	phototropism	biological_process	9	6179	31	55481	0.001413285	0.007657851	2.606795128	Cse_sc000429.1_g040.1; Cse_sc004241.1_g050.1; Cse_sc004247.1_g020.1; Cse_sc006798.1_g030.1; Cse_sc007211.1_g040.1; Cse_sc008667.1_g010.1; Cse_sc020949.1_g040.1; Cse_sc031407.1_g010.1; Cse_sc049440.1_g010.1
GO:0001666	response to hypoxia	biological_process	15	6179	64	55481	0.001426252	0.007717627	2.104443984	Cse_sc000244.1_g130.1; Cse_sc000608.1_g040.1; Cse_sc000920.1_g100.1; Cse_sc001217.1_g070.1; Cse_sc002278.1_g030.1; Cse_sc002577.1_g070.1; Cse_sc008063.1_g050.1; Cse_sc009495.1_g030.1; Cse_sc010252.1_g020.1; Cse_sc017200.1_g020.1; Cse_sc019061.1_g030.1; Cse_sc024695.1_g010.1; Cse_sc026558.1_g060.1; Cse_sc028766.1_g020.1; Cse_sc035997.1_g010.1
GO:0015292	uniporter activity	molecular_function	4	6179	9	55481	0.001463259	0.007791022	3.990649332	Cse_sc000826.1_g010.1; Cse_sc006436.1_g070.1; Cse_sc010146.1_g020.1; Cse_sc016595.1_g010.1
GO:0051560	mitochondrial calcium ion homeostasis	biological_process	4	6179	9	55481	0.001463259	0.007791022	3.990649332	Cse_sc000826.1_g010.1; Cse_sc006436.1_g070.1; Cse_sc010146.1_g020.1; Cse_sc016595.1_g010.1
GO:0009916	alternative oxidase activity	molecular_function	4	6179	9	55481	0.001463259	0.007791022	3.990649332	Cse_sc001902.1_g030.1; Cse_sc006766.1_g040.1; Cse_sc006766.1_g090.1; Cse_sc014765.1_g010.1
GO:0102721	ubiquinol:oxygen oxidoreductase activity	molecular_function	4	6179	9	55481	0.001463259	0.007791022	3.990649332	Cse_sc001902.1_g030.1; Cse_sc006766.1_g040.1; Cse_sc006766.1_g090.1; Cse_sc014765.1_g010.1
GO:2000001	regulation of DNA damage checkpoint	biological_process	4	6179	9	55481	0.001463259	0.007791022	3.990649332	Cse_sc001961.1_g090.1; Cse_sc009068.1_g010.1; Cse_sc009068.1_g040.1; Cse_sc011938.1_g020.1
GO:0003868	4-hydroxyphenylpyruvate dioxygenase activity	molecular_function	4	6179	9	55481	0.001463259	0.007791022	3.990649332	Cse_sc002207.1_g080.1; Cse_sc015783.1_g040.1; Cse_sc020225.1_g010.1; Cse_sc027823.1_g010.1
GO:0050105	L-gulonolactone oxidase activity	molecular_function	4	6179	9	55481	0.001463259	0.007791022	3.990649332	Cse_sc002658.1_g030.1; Cse_sc019986.1_g010.1; Cse_sc021169.1_g030.1; Cse_sc024599.1_g030.1
GO:0080113	regulation of seed growth	biological_process	4	6179	9	55481	0.001463259	0.007791022	3.990649332	Cse_sc004141.1_g040.1; Cse_sc004216.1_g030.1; Cse_sc007911.1_g010.1; Cse_sc008501.1_g030.1
GO:0048262	determination of dorsal/ventral asymmetry	biological_process	4	6179	9	55481	0.001463259	0.007791022	3.990649332	Cse_sc005798.1_g020.1; Cse_sc005798.1_g050.1; Cse_sc017952.1_g050.1; Cse_sc035745.1_g020.1
GO:0005094	Rho GDP-dissociation inhibitor activity	molecular_function	4	6179	9	55481	0.001463259	0.007791022	3.990649332	Cse_sc006171.1_g050.1; Cse_sc006708.1_g010.1; Cse_sc011710.1_g030.1; Cse_sc041643.1_g020.1
GO:0045437	uridine nucleosidase activity	molecular_function	4	6179	9	55481	0.001463259	0.007791022	3.990649332	Cse_sc006527.1_g050.1; Cse_sc020412.1_g040.1; Cse_sc022934.1_g030.1; Cse_sc036356.1_g010.1
GO:0051365	cellular response to potassium ion starvation	biological_process	4	6179	9	55481	0.001463259	0.007791022	3.990649332	Cse_sc014477.1_g010.1; Cse_sc023626.1_g010.1; Cse_sc024226.1_g010.1; Cse_sc039399.1_g010.1
GO:0032586	protein storage vacuole membrane	cellular_component	6	6179	17	55481	0.001492515	0.00790458	3.169045058	Cse_sc000459.1_g070.1; Cse_sc001951.1_g010.1; Cse_sc003120.1_g030.1; Cse_sc006744.1_g030.1; Cse_sc011968.1_g010.1; Cse_sc013846.1_g040.1
GO:0009269	response to desiccation	biological_process	6	6179	17	55481	0.001492515	0.00790458	3.169045058	Cse_sc000844.1_g080.1; Cse_sc001274.1_g050.1; Cse_sc007507.1_g050.1; Cse_sc009590.1_g020.1; Cse_sc015544.1_g050.1; Cse_sc018139.1_g090.1
GO:0031543	peptidyl-proline dioxygenase activity	molecular_function	6	6179	17	55481	0.001492515	0.00790458	3.169045058	Cse_sc006882.1_g040.1; Cse_sc009061.1_g030.1; Cse_sc010077.1_g020.1; Cse_sc010661.1_g040.1; Cse_sc014155.1_g010.1; Cse_sc024589.1_g020.1
GO:0062047	pipecolic acid N-hydroxylase	molecular_function	6	6179	17	55481	0.001492515	0.00790458	3.169045058	Cse_sc006882.1_g040.1; Cse_sc009061.1_g030.1; Cse_sc010077.1_g020.1; Cse_sc010661.1_g040.1; Cse_sc014155.1_g010.1; Cse_sc024589.1_g020.1
GO:0009751	response to salicylic acid	biological_process	59	6179	366	55481	0.001494779	0.007906071	1.447428139	Cse_sc000187.1_g020.1; Cse_sc000338.1_g080.1; Cse_sc000909.1_g050.1; Cse_sc001139.1_g040.1; Cse_sc001139.1_g050.1; Cse_sc001274.1_g050.1; Cse_sc001365.1_g020.1; Cse_sc001550.1_g010.1; Cse_sc001687.1_g020.1; Cse_sc001707.1_g050.1; Cse_sc001794.1_g030.1; Cse_sc002006.1_g070.1; Cse_sc002695.1_g090.1; Cse_sc003214.1_g050.1; Cse_sc003546.1_g070.1; Cse_sc003732.1_g060.1; Cse_sc004118.1_g020.1; Cse_sc00…
GO:0018105	peptidyl-serine phosphorylation	biological_process	23	6179	114	55481	0.001554989	0.008213636	1.811544763	Cse_sc000443.1_g070.1; Cse_sc000644.1_g030.1; Cse_sc004694.1_g030.1; Cse_sc005465.1_g070.1; Cse_sc007901.1_g100.1; Cse_sc009085.1_g050.1; Cse_sc009095.1_g070.1; Cse_sc010271.1_g010.1; Cse_sc010430.1_g030.1; Cse_sc010729.1_g040.1; Cse_sc012588.1_g030.1; Cse_sc014683.1_g020.1; Cse_sc015876.1_g030.1; Cse_sc017327.1_g010.1; Cse_sc019609.1_g020.1; Cse_sc020254.1_g010.1; Cse_sc024498.1_g030.1; Cse_sc02…
GO:0009524	phragmoplast	cellular_component	50	6179	301	55481	0.001582417	0.008347456	1.49152176	Cse_sc000221.1_g090.1; Cse_sc000234.1_g010.1; Cse_sc000659.1_g050.1; Cse_sc000700.1_g110.1; Cse_sc001313.1_g010.1; Cse_sc001566.1_g050.1; Cse_sc001907.1_g030.1; Cse_sc002324.1_g010.1; Cse_sc002355.1_g030.1; Cse_sc002571.1_g060.1; Cse_sc002711.1_g040.1; Cse_sc003084.1_g040.1; Cse_sc004328.1_g020.1; Cse_sc004509.1_g040.1; Cse_sc004603.1_g020.1; Cse_sc004626.1_g030.1; Cse_sc004747.1_g020.1; Cse_sc00…
GO:0009807	lignan biosynthetic process	biological_process	11	6179	42	55481	0.001608868	0.008475779	2.351632642	Cse_sc000992.1_g060.1; Cse_sc001639.1_g060.1; Cse_sc009019.1_g010.1; Cse_sc009855.1_g050.1; Cse_sc013788.1_g030.1; Cse_sc027788.1_g010.1; Cse_sc028564.1_g010.1; Cse_sc036574.1_g020.1; Cse_sc040604.1_g020.1; Cse_sc050839.1_g010.1; Cse_sc062773.1_g010.1
GO:0080148	negative regulation of response to water deprivation	biological_process	5	6179	13	55481	0.001628004	0.008531511	3.453446537	Cse_sc001211.1_g010.1; Cse_sc001445.1_g070.1; Cse_sc005010.1_g100.1; Cse_sc006117.1_g010.1; Cse_sc011028.1_g030.1
GO:0009759	indole glucosinolate biosynthetic process	biological_process	5	6179	13	55481	0.001628004	0.008531511	3.453446537	Cse_sc001880.1_g070.1; Cse_sc002631.1_g040.1; Cse_sc007503.1_g060.1; Cse_sc012106.1_g040.1; Cse_sc019860.1_g020.1
GO:0102131	3-oxo-glutaryl-[acp] methyl ester reductase activity	molecular_function	5	6179	13	55481	0.001628004	0.008531511	3.453446537	Cse_sc003925.1_g090.1; Cse_sc005465.1_g050.1; Cse_sc006963.1_g010.1; Cse_sc014602.1_g030.1; Cse_sc039075.1_g020.1
GO:0102132	3-oxo-pimeloyl-[acp] methyl ester reductase activity	molecular_function	5	6179	13	55481	0.001628004	0.008531511	3.453446537	Cse_sc003925.1_g090.1; Cse_sc005465.1_g050.1; Cse_sc006963.1_g010.1; Cse_sc014602.1_g030.1; Cse_sc039075.1_g020.1
GO:0035556	intracellular signal transduction	biological_process	37	6179	209	55481	0.001659341	0.008684318	1.589576827	Cse_sc000082.1_g020.1; Cse_sc000443.1_g070.1; Cse_sc000644.1_g030.1; Cse_sc001004.1_g060.1; Cse_sc004694.1_g030.1; Cse_sc005465.1_g070.1; Cse_sc006033.1_g050.1; Cse_sc006678.1_g030.1; Cse_sc006912.1_g020.1; Cse_sc007901.1_g100.1; Cse_sc008141.1_g060.1; Cse_sc009085.1_g050.1; Cse_sc009095.1_g070.1; Cse_sc010271.1_g010.1; Cse_sc010430.1_g030.1; Cse_sc010729.1_g040.1; Cse_sc012588.1_g030.1; Cse_sc01…
GO:0009535	chloroplast thylakoid membrane	cellular_component	102	6179	695	55481	0.001669871	0.008713687	1.317775571	Cse_sc000092.1_g080.1; Cse_sc000204.1_g060.1; Cse_sc000274.1_g150.1; Cse_sc000639.1_g140.1; Cse_sc000639.1_g170.1; Cse_sc000663.1_g110.1; Cse_sc000699.1_g060.1; Cse_sc001071.1_g030.1; Cse_sc001094.1_g010.1; Cse_sc001276.1_g090.1; Cse_sc001362.1_g050.1; Cse_sc001623.1_g040.1; Cse_sc001805.1_g010.1; Cse_sc001805.1_g050.1; Cse_sc001902.1_g030.1; Cse_sc002133.1_g030.1; Cse_sc002144.1_g040.1; Cse_sc00…
GO:0023014	signal transduction by protein phosphorylation	biological_process	18	6179	83	55481	0.001671507	0.008713687	1.947244554	Cse_sc000050.1_g230.1; Cse_sc000067.1_g030.1; Cse_sc000615.1_g030.1; Cse_sc000868.1_g040.1; Cse_sc000868.1_g060.1; Cse_sc000877.1_g140.1; Cse_sc001011.1_g060.1; Cse_sc001181.1_g010.1; Cse_sc001609.1_g030.1; Cse_sc002691.1_g020.1; Cse_sc002691.1_g030.1; Cse_sc004808.1_g010.1; Cse_sc006691.1_g020.1; Cse_sc011212.1_g030.1; Cse_sc015203.1_g030.1; Cse_sc017105.1_g030.1; Cse_sc019439.1_g010.1; Cse_sc01…
GO:0048767	root hair elongation	biological_process	18	6179	83	55481	0.001671507	0.008713687	1.947244554	Cse_sc000266.1_g030.1; Cse_sc001352.1_g030.1; Cse_sc002679.1_g040.1; Cse_sc002945.1_g030.1; Cse_sc003585.1_g060.1; Cse_sc004053.1_g050.1; Cse_sc004057.1_g010.1; Cse_sc005264.1_g020.1; Cse_sc005662.1_g040.1; Cse_sc010680.1_g030.1; Cse_sc011322.1_g010.1; Cse_sc014044.1_g020.1; Cse_sc014832.1_g020.1; Cse_sc016149.1_g010.1; Cse_sc017103.1_g030.1; Cse_sc020465.1_g030.1; Cse_sc028197.1_g020.1; Cse_sc03…
GO:0015293	symporter activity	molecular_function	30	6179	161	55481	0.001682176	0.008757858	1.673098322	Cse_sc001103.1_g020.1; Cse_sc001582.1_g030.1; Cse_sc001854.1_g020.1; Cse_sc002045.1_g030.1; Cse_sc002535.1_g020.1; Cse_sc003030.1_g100.1; Cse_sc003135.1_g020.1; Cse_sc003351.1_g030.1; Cse_sc003945.1_g020.1; Cse_sc004040.1_g010.1; Cse_sc004841.1_g030.1; Cse_sc005308.1_g020.1; Cse_sc006212.1_g040.1; Cse_sc006453.1_g040.1; Cse_sc006766.1_g110.1; Cse_sc007547.1_g010.1; Cse_sc007753.1_g010.1; Cse_sc00…
GO:0019344	cysteine biosynthetic process	biological_process	10	6179	37	55481	0.001750685	0.009090794	2.426746215	Cse_sc001853.1_g020.1; Cse_sc003421.1_g030.1; Cse_sc005906.1_g050.1; Cse_sc010309.1_g020.1; Cse_sc019703.1_g030.1; Cse_sc025183.1_g020.1; Cse_sc029645.1_g020.1; Cse_sc029819.1_g010.1; Cse_sc062855.1_g010.1; Cse_sc063774.1_g010.1
GO:0009097	isoleucine biosynthetic process	biological_process	10	6179	37	55481	0.001750685	0.009090794	2.426746215	Cse_sc005778.1_g030.1; Cse_sc006517.1_g020.1; Cse_sc006857.1_g010.1; Cse_sc008140.1_g030.1; Cse_sc012830.1_g010.1; Cse_sc013681.1_g020.1; Cse_sc014111.1_g050.1; Cse_sc045792.1_g010.1; Cse_sc058821.1_g010.1; Cse_sc061066.1_g020.1
GO:0042761	very long-chain fatty acid biosynthetic process	biological_process	7	6179	22	55481	0.001780422	0.009221201	2.856942135	Cse_sc001635.1_g050.1; Cse_sc003566.1_g010.1; Cse_sc006152.1_g040.1; Cse_sc011169.1_g030.1; Cse_sc014322.1_g020.1; Cse_sc021876.1_g010.1; Cse_sc047023.1_g010.1
GO:0034005	germacrene-A synthase activity	molecular_function	7	6179	22	55481	0.001780422	0.009221201	2.856942135	Cse_sc004085.1_g050.1; Cse_sc009127.1_g020.1; Cse_sc010137.1_g010.1; Cse_sc010632.1_g010.1; Cse_sc013289.1_g050.1; Cse_sc022472.1_g010.1; Cse_sc023447.1_g010.1
GO:0009617	response to bacterium	biological_process	47	6179	281	55481	0.001793382	0.009276274	1.501819099	Cse_sc000170.1_g100.1; Cse_sc000244.1_g130.1; Cse_sc001550.1_g010.1; Cse_sc001759.1_g030.1; Cse_sc001888.1_g100.1; Cse_sc002278.1_g030.1; Cse_sc002695.1_g090.1; Cse_sc003163.1_g070.1; Cse_sc003214.1_g050.1; Cse_sc003408.1_g060.1; Cse_sc003651.1_g030.1; Cse_sc003901.1_g050.1; Cse_sc004818.1_g060.1; Cse_sc005236.1_g020.1; Cse_sc005449.1_g030.1; Cse_sc006446.1_g050.1; Cse_sc006852.1_g010.1; Cse_sc00…
GO:0010114	response to red light	biological_process	20	6179	96	55481	0.001804055	0.009319393	1.870616874	Cse_sc001094.1_g010.1; Cse_sc001326.1_g060.1; Cse_sc002276.1_g040.1; Cse_sc002631.1_g040.1; Cse_sc004241.1_g050.1; Cse_sc004717.1_g080.1; Cse_sc004980.1_g010.1; Cse_sc006639.1_g010.1; Cse_sc007503.1_g060.1; Cse_sc009626.1_g030.1; Cse_sc011262.1_g020.1; Cse_sc012106.1_g040.1; Cse_sc018213.1_g030.1; Cse_sc019860.1_g020.1; Cse_sc021551.1_g010.1; Cse_sc022605.1_g020.1; Cse_sc025817.1_g020.1; Cse_sc02…
GO:0016866	intramolecular transferase activity	molecular_function	9	6179	32	55481	0.001852584	0.0094828	2.52533278	Cse_sc000056.1_g050.1; Cse_sc002862.1_g060.1; Cse_sc004817.1_g020.1; Cse_sc009517.1_g040.1; Cse_sc009996.1_g020.1; Cse_sc012398.1_g040.1; Cse_sc012628.1_g020.1; Cse_sc030951.1_g010.1; Cse_sc039633.1_g010.1
GO:0010187	negative regulation of seed germination	biological_process	9	6179	32	55481	0.001852584	0.0094828	2.52533278	Cse_sc000641.1_g030.1; Cse_sc004717.1_g080.1; Cse_sc010363.1_g010.1; Cse_sc011262.1_g020.1; Cse_sc012947.1_g010.1; Cse_sc017729.1_g020.1; Cse_sc020246.1_g010.1; Cse_sc022605.1_g020.1; Cse_sc054260.1_g010.1
GO:0048868	pollen tube development	biological_process	9	6179	32	55481	0.001852584	0.0094828	2.52533278	Cse_sc000989.1_g040.1; Cse_sc008356.1_g040.1; Cse_sc008692.1_g010.1; Cse_sc009705.1_g010.1; Cse_sc010957.1_g050.1; Cse_sc018106.1_g010.1; Cse_sc021707.1_g020.1; Cse_sc042837.1_g010.1; Cse_sc050781.1_g010.1
GO:0030134	COPII-coated ER to Golgi transport vesicle	cellular_component	9	6179	32	55481	0.001852584	0.0094828	2.52533278	Cse_sc003123.1_g030.1; Cse_sc003834.1_g030.1; Cse_sc009382.1_g040.1; Cse_sc009823.1_g050.1; Cse_sc017489.1_g030.1; Cse_sc018079.1_g010.1; Cse_sc019341.1_g030.1; Cse_sc026795.1_g030.1; Cse_sc031162.1_g020.1
GO:0008610	lipid biosynthetic process	biological_process	8	6179	27	55481	0.00187934	0.0094828	2.660432888	Cse_sc000432.1_g060.1; Cse_sc003438.1_g020.1; Cse_sc003484.1_g030.1; Cse_sc003484.1_g050.1; Cse_sc007076.1_g020.1; Cse_sc008234.1_g020.1; Cse_sc016525.1_g020.1; Cse_sc032033.1_g010.1
GO:0010075	regulation of meristem growth	biological_process	8	6179	27	55481	0.00187934	0.0094828	2.660432888	Cse_sc000681.1_g060.1; Cse_sc003530.1_g020.1; Cse_sc004241.1_g050.1; Cse_sc009411.1_g030.1; Cse_sc010016.1_g030.1; Cse_sc011605.1_g010.1; Cse_sc028235.1_g010.1; Cse_sc055763.1_g010.1
GO:0009099	valine biosynthetic process	biological_process	8	6179	27	55481	0.00187934	0.0094828	2.660432888	Cse_sc005778.1_g030.1; Cse_sc008140.1_g030.1; Cse_sc012830.1_g010.1; Cse_sc013681.1_g020.1; Cse_sc014111.1_g050.1; Cse_sc045792.1_g010.1; Cse_sc058821.1_g010.1; Cse_sc061066.1_g020.1
GO:0045492	xylan biosynthetic process	biological_process	13	6179	54	55481	0.001910675	0.0094828	2.161601721	Cse_sc000080.1_g080.1; Cse_sc000528.1_g070.1; Cse_sc001438.1_g070.1; Cse_sc001572.1_g030.1; Cse_sc003564.1_g050.1; Cse_sc004243.1_g040.1; Cse_sc004243.1_g080.1; Cse_sc005205.1_g020.1; Cse_sc011115.1_g020.1; Cse_sc012217.1_g020.1; Cse_sc016156.1_g050.1; Cse_sc023368.1_g030.1; Cse_sc026272.1_g020.1
GO:0010053	root epidermal cell differentiation	biological_process	13	6179	54	55481	0.001910675	0.0094828	2.161601721	Cse_sc000564.1_g020.1; Cse_sc001090.1_g030.1; Cse_sc003313.1_g050.1; Cse_sc005621.1_g030.1; Cse_sc006171.1_g050.1; Cse_sc006708.1_g010.1; Cse_sc011322.1_g010.1; Cse_sc011710.1_g010.1; Cse_sc011710.1_g030.1; Cse_sc019962.1_g010.1; Cse_sc022607.1_g030.1; Cse_sc041643.1_g020.1; Cse_sc048658.1_g010.1
GO:0080169	cellular response to boron-containing substance deprivation	biological_process	3	6179	6	55481	0.001914156	0.0094828	4.489480498	Cse_sc000067.1_g060.1; Cse_sc000885.1_g050.1; Cse_sc008975.1_g030.1
GO:0004318	enoyl-[acyl-carrier-protein] reductase (NADH) activity	molecular_function	3	6179	6	55481	0.001914156	0.0094828	4.489480498	Cse_sc000141.1_g040.1; Cse_sc002156.1_g120.1; Cse_sc014627.1_g020.1
GO:0016631	enoyl-[acyl-carrier-protein] reductase activity	molecular_function	3	6179	6	55481	0.001914156	0.0094828	4.489480498	Cse_sc000141.1_g040.1; Cse_sc002156.1_g120.1; Cse_sc014627.1_g020.1
GO:0080170	hydrogen peroxide transmembrane transport	biological_process	3	6179	6	55481	0.001914156	0.0094828	4.489480498	Cse_sc000215.1_g010.1; Cse_sc003348.1_g020.1; Cse_sc012068.1_g040.1
GO:0004033	aldo-keto reductase (NADP) activity	molecular_function	3	6179	6	55481	0.001914156	0.0094828	4.489480498	Cse_sc000311.1_g040.1; Cse_sc011745.1_g050.1; Cse_sc023188.1_g030.1
GO:0070401	NADP+ binding	molecular_function	3	6179	6	55481	0.001914156	0.0094828	4.489480498	Cse_sc000311.1_g040.1; Cse_sc011745.1_g050.1; Cse_sc023188.1_g030.1
GO:0040009	regulation of growth rate	biological_process	3	6179	6	55481	0.001914156	0.0094828	4.489480498	Cse_sc000343.1_g040.1; Cse_sc001128.1_g030.1; Cse_sc003020.1_g020.1
GO:0050362	L-tryptophan:2-oxoglutarate aminotransferase activity	molecular_function	3	6179	6	55481	0.001914156	0.0094828	4.489480498	Cse_sc000604.1_g050.1; Cse_sc006039.1_g010.1; Cse_sc018968.1_g020.1
GO:0071494	cellular response to UV-C	biological_process	3	6179	6	55481	0.001914156	0.0094828	4.489480498	Cse_sc000681.1_g060.1; Cse_sc001696.1_g010.1; Cse_sc028235.1_g010.1
GO:0032451	demethylase activity	molecular_function	3	6179	6	55481	0.001914156	0.0094828	4.489480498	Cse_sc000716.1_g120.1; Cse_sc022430.1_g010.1; Cse_sc038725.1_g010.1
GO:0010295	(+)-abscisic acid 8'-hydroxylase activity	molecular_function	3	6179	6	55481	0.001914156	0.0094828	4.489480498	Cse_sc001326.1_g060.1; Cse_sc007661.1_g020.1; Cse_sc009551.1_g010.1
GO:0006021	inositol biosynthetic process	biological_process	3	6179	6	55481	0.001914156	0.0094828	4.489480498	Cse_sc001351.1_g030.1; Cse_sc031249.1_g020.1; Cse_sc032042.1_g010.1
GO:0090359	negative regulation of abscisic acid biosynthetic process	biological_process	3	6179	6	55481	0.001914156	0.0094828	4.489480498	Cse_sc003410.1_g010.1; Cse_sc005913.1_g040.1; Cse_sc045750.1_g010.1
GO:0006971	hypotonic response	biological_process	3	6179	6	55481	0.001914156	0.0094828	4.489480498	Cse_sc005109.1_g020.1; Cse_sc017744.1_g030.1; Cse_sc019587.1_g020.1
GO:2000693	positive regulation of seed maturation	biological_process	3	6179	6	55481	0.001914156	0.0094828	4.489480498	Cse_sc005109.1_g020.1; Cse_sc017744.1_g030.1; Cse_sc019587.1_g020.1
GO:0033759	flavone synthase activity	molecular_function	3	6179	6	55481	0.001914156	0.0094828	4.489480498	Cse_sc005236.1_g020.1; Cse_sc010001.1_g020.1; Cse_sc024041.1_g010.1
GO:0034785	salicylate 5-hydroxylase activity	molecular_function	3	6179	6	55481	0.001914156	0.0094828	4.489480498	Cse_sc005236.1_g020.1; Cse_sc010001.1_g020.1; Cse_sc024041.1_g010.1
GO:0000780	condensed nuclear chromosome, centromeric region	cellular_component	3	6179	6	55481	0.001914156	0.0094828	4.489480498	Cse_sc005621.1_g040.1; Cse_sc015050.1_g020.1; Cse_sc034145.1_g020.1
GO:0031616	spindle pole centrosome	cellular_component	3	6179	6	55481	0.001914156	0.0094828	4.489480498	Cse_sc005621.1_g040.1; Cse_sc015050.1_g020.1; Cse_sc034145.1_g020.1
GO:0032133	chromosome passenger complex	cellular_component	3	6179	6	55481	0.001914156	0.0094828	4.489480498	Cse_sc005621.1_g040.1; Cse_sc015050.1_g020.1; Cse_sc034145.1_g020.1
GO:0035174	histone serine kinase activity	molecular_function	3	6179	6	55481	0.001914156	0.0094828	4.489480498	Cse_sc005621.1_g040.1; Cse_sc015050.1_g020.1; Cse_sc034145.1_g020.1
GO:0090693	plant organ senescence	biological_process	3	6179	6	55481	0.001914156	0.0094828	4.489480498	Cse_sc011262.1_g020.1; Cse_sc029730.1_g030.1; Cse_sc041082.1_g030.1
GO:0005223	intracellular cGMP-activated cation channel activity	molecular_function	3	6179	6	55481	0.001914156	0.0094828	4.489480498	Cse_sc017038.1_g030.1; Cse_sc031425.1_g010.1; Cse_sc043017.1_g020.1
GO:0047724	inosine nucleosidase activity	molecular_function	3	6179	6	55481	0.001914156	0.0094828	4.489480498	Cse_sc020412.1_g040.1; Cse_sc022934.1_g030.1; Cse_sc036356.1_g010.1
GO:0009630	gravitropism	biological_process	14	6179	60	55481	0.001983085	0.009810935	2.095090899	Cse_sc000008.1_g080.1; Cse_sc000429.1_g040.1; Cse_sc000464.1_g040.1; Cse_sc001305.1_g010.1; Cse_sc002153.1_g070.1; Cse_sc003113.1_g010.1; Cse_sc005662.1_g040.1; Cse_sc011211.1_g010.1; Cse_sc023227.1_g040.1; Cse_sc023342.1_g010.1; Cse_sc037388.1_g020.1; Cse_sc037705.1_g010.1; Cse_sc108954.1_g010.1; Cse_sc141285.1_g010.1
GO:0051026	chiasma assembly	biological_process	17	6179	78	55481	0.001985312	0.009810935	1.956953038	Cse_sc000337.1_g010.1; Cse_sc001288.1_g100.1; Cse_sc001399.1_g060.1; Cse_sc002392.1_g030.1; Cse_sc002457.1_g030.1; Cse_sc002838.1_g030.1; Cse_sc003799.1_g080.1; Cse_sc003843.1_g050.1; Cse_sc006511.1_g010.1; Cse_sc008563.1_g060.1; Cse_sc009633.1_g060.1; Cse_sc010622.1_g020.1; Cse_sc012815.1_g020.1; Cse_sc021074.1_g010.1; Cse_sc025780.1_g040.1; Cse_sc046746.1_g010.1; Cse_sc082587.1_g010.1
GO:0009646	response to absence of light	biological_process	11	6179	43	55481	0.002008304	0.00990002	2.296943511	Cse_sc001794.1_g030.1; Cse_sc003573.1_g030.1; Cse_sc004241.1_g050.1; Cse_sc007262.1_g020.1; Cse_sc007648.1_g030.1; Cse_sc014030.1_g020.1; Cse_sc020466.1_g010.1; Cse_sc025817.1_g020.1; Cse_sc028497.1_g010.1; Cse_sc040157.1_g010.1; Cse_sc077363.1_g010.1
GO:0010089	xylem development	biological_process	11	6179	43	55481	0.002008304	0.00990002	2.296943511	Cse_sc002746.1_g030.1; Cse_sc002746.1_g050.1; Cse_sc007243.1_g080.1; Cse_sc011300.1_g020.1; Cse_sc014743.1_g020.1; Cse_sc016575.1_g030.1; Cse_sc018154.1_g030.1; Cse_sc035664.1_g010.1; Cse_sc036486.1_g010.1; Cse_sc053835.1_g010.1; Cse_sc056979.1_g010.1
GO:0004197	cysteine-type endopeptidase activity	molecular_function	26	6179	136	55481	0.002047675	0.010081639	1.716566073	Cse_sc000602.1_g080.1; Cse_sc000805.1_g060.1; Cse_sc000810.1_g050.1; Cse_sc001060.1_g030.1; Cse_sc001855.1_g070.1; Cse_sc002213.1_g060.1; Cse_sc004397.1_g020.1; Cse_sc004512.1_g060.1; Cse_sc009540.1_g030.1; Cse_sc012168.1_g030.1; Cse_sc012831.1_g040.1; Cse_sc012911.1_g020.1; Cse_sc014001.1_g020.1; Cse_sc014702.1_g050.1; Cse_sc015363.1_g030.1; Cse_sc015834.1_g030.1; Cse_sc021231.1_g040.1; Cse_sc02…
GO:0008152	metabolic process	biological_process	6	6179	18	55481	0.002208917	0.010848723	2.992986999	Cse_sc003371.1_g030.1; Cse_sc008560.1_g060.1; Cse_sc009156.1_g020.1; Cse_sc011934.1_g010.1; Cse_sc013183.1_g030.1; Cse_sc030720.1_g010.1
GO:0071219	cellular response to molecule of bacterial origin	biological_process	6	6179	18	55481	0.002208917	0.010848723	2.992986999	Cse_sc005287.1_g030.1; Cse_sc008714.1_g010.1; Cse_sc018079.1_g020.1; Cse_sc019552.1_g020.1; Cse_sc030456.1_g030.1; Cse_sc031115.1_g020.1
GO:0030170	pyridoxal phosphate binding	molecular_function	40	6179	234	55481	0.002296599	0.011265482	1.534865128	Cse_sc000030.1_g060.1; Cse_sc000075.1_g040.1; Cse_sc000604.1_g050.1; Cse_sc000677.1_g030.1; Cse_sc000889.1_g020.1; Cse_sc000920.1_g100.1; Cse_sc002053.1_g010.1; Cse_sc002078.1_g070.1; Cse_sc003099.1_g010.1; Cse_sc003230.1_g030.1; Cse_sc003925.1_g070.1; Cse_sc004082.1_g010.1; Cse_sc004634.1_g020.1; Cse_sc005648.1_g050.1; Cse_sc006323.1_g010.1; Cse_sc006517.1_g020.1; Cse_sc006857.1_g010.1; Cse_sc00…
GO:0043622	cortical microtubule organization	biological_process	13	6179	55	55481	0.002304203	0.011288898	2.122299872	Cse_sc000090.1_g120.1; Cse_sc000409.1_g070.1; Cse_sc000989.1_g040.1; Cse_sc001676.1_g060.1; Cse_sc003661.1_g030.1; Cse_sc004328.1_g020.1; Cse_sc005097.1_g050.1; Cse_sc005287.1_g030.1; Cse_sc012504.1_g020.1; Cse_sc018106.1_g010.1; Cse_sc026702.1_g010.1; Cse_sc030456.1_g030.1; Cse_sc045728.1_g010.1
GO:0010208	pollen wall assembly	biological_process	7	6179	23	55481	0.002465782	0.012036155	2.73272726	Cse_sc000589.1_g080.1; Cse_sc000989.1_g040.1; Cse_sc001713.1_g030.1; Cse_sc009315.1_g020.1; Cse_sc010730.1_g050.1; Cse_sc018106.1_g010.1; Cse_sc042925.1_g020.1
GO:0038023	signaling receptor activity	molecular_function	7	6179	23	55481	0.002465782	0.012036155	2.73272726	Cse_sc000659.1_g040.1; Cse_sc003594.1_g030.1; Cse_sc010384.1_g010.1; Cse_sc012195.1_g020.1; Cse_sc022521.1_g020.1; Cse_sc022773.1_g020.1; Cse_sc037140.1_g020.1
GO:0045010	actin nucleation	biological_process	7	6179	23	55481	0.002465782	0.012036155	2.73272726	Cse_sc002324.1_g010.1; Cse_sc017689.1_g010.1; Cse_sc017775.1_g020.1; Cse_sc019612.1_g020.1; Cse_sc033399.1_g030.1; Cse_sc038029.1_g010.1; Cse_sc041933.1_g010.1
GO:0048653	anther development	biological_process	11	6179	44	55481	0.002485338	0.012107888	2.244740249	Cse_sc001164.1_g040.1; Cse_sc001465.1_g080.1; Cse_sc002380.1_g040.1; Cse_sc005660.1_g020.1; Cse_sc011846.1_g020.1; Cse_sc013634.1_g020.1; Cse_sc020435.1_g020.1; Cse_sc021057.1_g010.1; Cse_sc024548.1_g020.1; Cse_sc031677.1_g020.1; Cse_sc249461.1_g010.1
GO:0010290	chlorophyll catabolite transmembrane transporter activity	molecular_function	8	6179	28	55481	0.002498694	0.012107888	2.565417428	Cse_sc000138.1_g100.1; Cse_sc000296.1_g050.1; Cse_sc001434.1_g040.1; Cse_sc004159.1_g060.1; Cse_sc006330.1_g020.1; Cse_sc029015.1_g020.1; Cse_sc135211.1_g010.1; Cse_sc219489.1_g010.1
GO:0015431	glutathione S-conjugate-exporting ATPase activity	molecular_function	8	6179	28	55481	0.002498694	0.012107888	2.565417428	Cse_sc000138.1_g100.1; Cse_sc000296.1_g050.1; Cse_sc001434.1_g040.1; Cse_sc004159.1_g060.1; Cse_sc006330.1_g020.1; Cse_sc029015.1_g020.1; Cse_sc135211.1_g010.1; Cse_sc219489.1_g010.1
GO:0004806	triglyceride lipase activity	molecular_function	8	6179	28	55481	0.002498694	0.012107888	2.565417428	Cse_sc000929.1_g130.1; Cse_sc002590.1_g010.1; Cse_sc013327.1_g020.1; Cse_sc014872.1_g010.1; Cse_sc018862.1_g020.1; Cse_sc020797.1_g010.1; Cse_sc022020.1_g020.1; Cse_sc026804.1_g010.1
GO:0033809	anthocyanin 6''-O-malonyltransferase activity	molecular_function	8	6179	28	55481	0.002498694	0.012107888	2.565417428	Cse_sc003771.1_g010.1; Cse_sc006535.1_g030.1; Cse_sc011387.1_g020.1; Cse_sc011930.1_g010.1; Cse_sc012503.1_g020.1; Cse_sc012915.1_g020.1; Cse_sc017052.1_g020.1; Cse_sc045632.1_g010.1
GO:0102588	cyanidin 3-O-glucoside 6''-O-malonyltransferase activity	molecular_function	8	6179	28	55481	0.002498694	0.012107888	2.565417428	Cse_sc003771.1_g010.1; Cse_sc006535.1_g030.1; Cse_sc011387.1_g020.1; Cse_sc011930.1_g010.1; Cse_sc012503.1_g020.1; Cse_sc012915.1_g020.1; Cse_sc017052.1_g020.1; Cse_sc045632.1_g010.1
GO:0009624	response to nematode	biological_process	31	6179	172	55481	0.002534754	0.012267719	1.61830111	Cse_sc000002.1_g140.1; Cse_sc000037.1_g080.1; Cse_sc000244.1_g130.1; Cse_sc002278.1_g030.1; Cse_sc002781.1_g020.1; Cse_sc002835.1_g060.1; Cse_sc003400.1_g010.1; Cse_sc003661.1_g030.1; Cse_sc003797.1_g090.1; Cse_sc004108.1_g030.1; Cse_sc005102.1_g020.1; Cse_sc006655.1_g060.1; Cse_sc010432.1_g010.1; Cse_sc011223.1_g010.1; Cse_sc011622.1_g030.1; Cse_sc013648.1_g030.1; Cse_sc015080.1_g020.1; Cse_sc01…
GO:0005337	nucleoside transmembrane transporter activity	molecular_function	5	6179	14	55481	0.002581668	0.012374628	3.206771785	Cse_sc000532.1_g120.1; Cse_sc006954.1_g020.1; Cse_sc010200.1_g020.1; Cse_sc020557.1_g030.1; Cse_sc024612.1_g020.1
GO:1990137	plant seed peroxidase activity	molecular_function	5	6179	14	55481	0.002581668	0.012374628	3.206771785	Cse_sc001274.1_g050.1; Cse_sc004614.1_g010.1; Cse_sc004614.1_g040.1; Cse_sc008044.1_g030.1; Cse_sc024250.1_g030.1
GO:0048575	short-day photoperiodism, flowering	biological_process	5	6179	14	55481	0.002581668	0.012374628	3.206771785	Cse_sc002467.1_g050.1; Cse_sc003553.1_g040.1; Cse_sc004980.1_g010.1; Cse_sc009863.1_g010.1; Cse_sc010048.1_g030.1
GO:0004316	3-oxoacyl-[acyl-carrier-protein] reductase (NADPH) activity	molecular_function	5	6179	14	55481	0.002581668	0.012374628	3.206771785	Cse_sc003925.1_g090.1; Cse_sc005465.1_g050.1; Cse_sc006963.1_g010.1; Cse_sc014602.1_g030.1; Cse_sc039075.1_g020.1
GO:0000156	phosphorelay response regulator activity	molecular_function	5	6179	14	55481	0.002581668	0.012374628	3.206771785	Cse_sc004141.1_g040.1; Cse_sc007449.1_g040.1; Cse_sc007911.1_g010.1; Cse_sc008501.1_g030.1; Cse_sc021551.1_g010.1
GO:1900140	regulation of seedling development	biological_process	5	6179	14	55481	0.002581668	0.012374628	3.206771785	Cse_sc005154.1_g060.1; Cse_sc013293.1_g020.1; Cse_sc015046.1_g020.1; Cse_sc016654.1_g040.1; Cse_sc018631.1_g030.1
GO:0004455	ketol-acid reductoisomerase activity	molecular_function	5	6179	14	55481	0.002581668	0.012374628	3.206771785	Cse_sc008140.1_g030.1; Cse_sc012830.1_g010.1; Cse_sc013681.1_g020.1; Cse_sc014111.1_g050.1; Cse_sc045792.1_g010.1
GO:0009082	branched-chain amino acid biosynthetic process	biological_process	5	6179	14	55481	0.002581668	0.012374628	3.206771785	Cse_sc008140.1_g030.1; Cse_sc012830.1_g010.1; Cse_sc013681.1_g020.1; Cse_sc014111.1_g050.1; Cse_sc045792.1_g010.1
GO:0004838	L-tyrosine:2-oxoglutarate aminotransferase activity	molecular_function	4	6179	10	55481	0.002658354	0.012635895	3.591584399	Cse_sc000604.1_g050.1; Cse_sc003230.1_g030.1; Cse_sc008903.1_g020.1; Cse_sc018968.1_g020.1
GO:0016127	sterol catabolic process	biological_process	4	6179	10	55481	0.002658354	0.012635895	3.591584399	Cse_sc000629.1_g050.1; Cse_sc005039.1_g020.1; Cse_sc009234.1_g010.1; Cse_sc065723.1_g020.1
GO:0034434	sterol esterification	biological_process	4	6179	10	55481	0.002658354	0.012635895	3.591584399	Cse_sc000629.1_g050.1; Cse_sc005039.1_g020.1; Cse_sc009234.1_g010.1; Cse_sc065723.1_g020.1
GO:0010233	phloem transport	biological_process	4	6179	10	55481	0.002658354	0.012635895	3.591584399	Cse_sc000641.1_g030.1; Cse_sc006483.1_g020.1; Cse_sc022418.1_g030.1; Cse_sc044355.1_g010.1
GO:0003885	D-arabinono-1,4-lactone oxidase activity	molecular_function	4	6179	10	55481	0.002658354	0.012635895	3.591584399	Cse_sc002658.1_g030.1; Cse_sc019986.1_g010.1; Cse_sc021169.1_g030.1; Cse_sc024599.1_g030.1
GO:0045338	farnesyl diphosphate metabolic process	biological_process	4	6179	10	55481	0.002658354	0.012635895	3.591584399	Cse_sc009127.1_g020.1; Cse_sc010137.1_g010.1; Cse_sc022472.1_g010.1; Cse_sc023447.1_g010.1
GO:0006723	cuticle hydrocarbon biosynthetic process	biological_process	4	6179	10	55481	0.002658354	0.012635895	3.591584399	Cse_sc021766.1_g010.1; Cse_sc039178.1_g030.1; Cse_sc045487.1_g010.1; Cse_sc074162.1_g010.1
GO:0009556	microsporogenesis	biological_process	12	6179	50	55481	0.002661701	0.012636742	2.154950639	Cse_sc001713.1_g030.1; Cse_sc005503.1_g050.1; Cse_sc009156.1_g020.1; Cse_sc009315.1_g020.1; Cse_sc010730.1_g050.1; Cse_sc011934.1_g010.1; Cse_sc014466.1_g030.1; Cse_sc021057.1_g010.1; Cse_sc030720.1_g010.1; Cse_sc042925.1_g020.1; Cse_sc051184.1_g010.1; Cse_sc057331.1_g010.1
GO:0004499	N,N-dimethylaniline monooxygenase activity	molecular_function	13	6179	56	55481	0.002762218	0.013098366	2.08440166	Cse_sc000197.1_g020.1; Cse_sc000197.1_g040.1; Cse_sc000523.1_g080.1; Cse_sc001482.1_g030.1; Cse_sc006882.1_g040.1; Cse_sc007029.1_g030.1; Cse_sc009061.1_g030.1; Cse_sc010077.1_g020.1; Cse_sc010661.1_g040.1; Cse_sc014155.1_g010.1; Cse_sc018332.1_g020.1; Cse_sc024589.1_g020.1; Cse_sc047954.1_g020.1
GO:0009579	thylakoid	cellular_component	37	6179	215	55481	0.002773935	0.013138305	1.545216544	Cse_sc000008.1_g180.1; Cse_sc000141.1_g040.1; Cse_sc000432.1_g030.1; Cse_sc001094.1_g010.1; Cse_sc001430.1_g100.1; Cse_sc001902.1_g030.1; Cse_sc002133.1_g030.1; Cse_sc002276.1_g040.1; Cse_sc002686.1_g030.1; Cse_sc002688.1_g090.1; Cse_sc003285.1_g010.1; Cse_sc005315.1_g010.1; Cse_sc006446.1_g050.1; Cse_sc007262.1_g030.1; Cse_sc007276.1_g060.1; Cse_sc008237.1_g050.1; Cse_sc009349.1_g040.1; Cse_sc01…
GO:0010224	response to UV-B	biological_process	28	6179	153	55481	0.002956063	0.013967746	1.643208548	Cse_sc000012.1_g060.1; Cse_sc000208.1_g060.1; Cse_sc000485.1_g060.1; Cse_sc001363.1_g020.1; Cse_sc001788.1_g020.1; Cse_sc001820.1_g080.1; Cse_sc002465.1_g020.1; Cse_sc005135.1_g010.1; Cse_sc005142.1_g030.1; Cse_sc005307.1_g050.1; Cse_sc005557.1_g070.1; Cse_sc006492.1_g010.1; Cse_sc006944.1_g010.1; Cse_sc008230.1_g040.1; Cse_sc008714.1_g010.1; Cse_sc009521.1_g010.1; Cse_sc010366.1_g030.1; Cse_sc01…
GO:0019722	calcium-mediated signaling	biological_process	28	6179	153	55481	0.002956063	0.013967746	1.643208548	Cse_sc000464.1_g040.1; Cse_sc000744.1_g040.1; Cse_sc000830.1_g090.1; Cse_sc000927.1_g010.1; Cse_sc002195.1_g040.1; Cse_sc002586.1_g030.1; Cse_sc005553.1_g090.1; Cse_sc006229.1_g030.1; Cse_sc008382.1_g040.1; Cse_sc010936.1_g040.1; Cse_sc012338.1_g070.1; Cse_sc012781.1_g030.1; Cse_sc014081.1_g010.1; Cse_sc014081.1_g050.1; Cse_sc015327.1_g050.1; Cse_sc017247.1_g050.1; Cse_sc017343.1_g010.1; Cse_sc01…
GO:0031347	regulation of defense response	biological_process	18	6179	87	55481	0.002962089	0.013979658	1.857716068	Cse_sc000263.1_g070.1; Cse_sc001139.1_g040.1; Cse_sc001139.1_g050.1; Cse_sc003214.1_g050.1; Cse_sc004961.1_g030.1; Cse_sc005492.1_g030.1; Cse_sc005766.1_g030.1; Cse_sc005822.1_g030.1; Cse_sc006613.1_g040.1; Cse_sc009075.1_g070.1; Cse_sc011651.1_g080.1; Cse_sc016713.1_g010.1; Cse_sc025888.1_g020.1; Cse_sc029066.1_g040.1; Cse_sc036892.1_g010.1; Cse_sc041708.1_g010.1; Cse_sc041741.1_g020.1; Cse_sc04…
GO:0015031	protein transport	biological_process	80	6179	537	55481	0.00303061	0.014286139	1.337647821	Cse_sc000190.1_g050.1; Cse_sc000257.1_g060.1; Cse_sc000531.1_g180.1; Cse_sc000839.1_g070.1; Cse_sc000850.1_g020.1; Cse_sc000871.1_g050.1; Cse_sc001146.1_g030.1; Cse_sc001152.1_g020.1; Cse_sc001598.1_g020.1; Cse_sc001669.1_g010.1; Cse_sc001919.1_g040.1; Cse_sc002003.1_g050.1; Cse_sc002014.1_g040.1; Cse_sc002478.1_g020.1; Cse_sc002661.1_g010.1; Cse_sc002917.1_g060.1; Cse_sc003377.1_g050.1; Cse_sc00…
GO:0006032	chitin catabolic process	biological_process	11	6179	45	55481	0.003050628	0.014363524	2.194857133	Cse_sc000318.1_g070.1; Cse_sc002466.1_g010.1; Cse_sc004362.1_g020.1; Cse_sc004368.1_g030.1; Cse_sc006131.1_g060.1; Cse_sc013218.1_g010.1; Cse_sc020864.1_g030.1; Cse_sc022438.1_g010.1; Cse_sc025905.1_g010.1; Cse_sc034606.1_g010.1; Cse_sc055693.1_g010.1
GO:0031901	early endosome membrane	cellular_component	9	6179	34	55481	0.003059586	0.014371765	2.376783793	Cse_sc000203.1_g140.1; Cse_sc004732.1_g040.1; Cse_sc007302.1_g020.1; Cse_sc009358.1_g030.1; Cse_sc015362.1_g030.1; Cse_sc019595.1_g010.1; Cse_sc021456.1_g020.1; Cse_sc027137.1_g020.1; Cse_sc027497.1_g070.1
GO:0009927	histidine phosphotransfer kinase activity	molecular_function	9	6179	34	55481	0.003059586	0.014371765	2.376783793	Cse_sc000291.1_g090.1; Cse_sc007648.1_g070.1; Cse_sc009293.1_g020.1; Cse_sc018079.1_g020.1; Cse_sc018154.1_g030.1; Cse_sc019552.1_g020.1; Cse_sc020471.1_g020.1; Cse_sc025294.1_g010.1; Cse_sc031115.1_g020.1
GO:0048768	root hair cell tip growth	biological_process	6	6179	19	55481	0.003163938	0.014792246	2.835461367	Cse_sc000001.1_g250.1; Cse_sc000409.1_g010.1; Cse_sc002781.1_g020.1; Cse_sc004563.1_g030.1; Cse_sc007244.1_g070.1; Cse_sc038821.1_g010.1
GO:0070034	telomerase RNA binding	molecular_function	6	6179	19	55481	0.003163938	0.014792246	2.835461367	Cse_sc003544.1_g010.1; Cse_sc008627.1_g010.1; Cse_sc009477.1_g030.1; Cse_sc012076.1_g020.1; Cse_sc012234.1_g010.1; Cse_sc015159.1_g030.1
GO:0007264	small GTPase mediated signal transduction	biological_process	6	6179	19	55481	0.003163938	0.014792246	2.835461367	Cse_sc004259.1_g010.1; Cse_sc012507.1_g010.1; Cse_sc018554.1_g020.1; Cse_sc019827.1_g020.1; Cse_sc029823.1_g010.1; Cse_sc030700.1_g010.1
GO:0042277	peptide binding	molecular_function	6	6179	19	55481	0.003163938	0.014792246	2.835461367	Cse_sc008007.1_g050.1; Cse_sc011036.1_g020.1; Cse_sc020506.1_g010.1; Cse_sc025749.1_g020.1; Cse_sc038290.1_g020.1; Cse_sc073221.1_g010.1
GO:0010345	suberin biosynthetic process	biological_process	13	6179	57	55481	0.003292355	0.015374602	2.04783321	Cse_sc001584.1_g040.1; Cse_sc001635.1_g050.1; Cse_sc001698.1_g010.1; Cse_sc004427.1_g070.1; Cse_sc005117.1_g040.1; Cse_sc005158.1_g030.1; Cse_sc006413.1_g010.1; Cse_sc012625.1_g040.1; Cse_sc018182.1_g020.1; Cse_sc031942.1_g010.1; Cse_sc031942.1_g020.1; Cse_sc033092.1_g020.1; Cse_sc043201.1_g020.1
GO:0009750	response to fructose	biological_process	7	6179	24	55481	0.003341359	0.015566987	2.618863624	Cse_sc000608.1_g040.1; Cse_sc002577.1_g070.1; Cse_sc009495.1_g030.1; Cse_sc019061.1_g030.1; Cse_sc020759.1_g010.1; Cse_sc024695.1_g010.1; Cse_sc028766.1_g020.1
GO:0005536	glucose binding	molecular_function	7	6179	24	55481	0.003341359	0.015566987	2.618863624	Cse_sc002163.1_g020.1; Cse_sc004032.1_g080.1; Cse_sc012103.1_g020.1; Cse_sc046242.1_g010.1; Cse_sc046956.1_g020.1; Cse_sc053534.1_g020.1; Cse_sc104196.1_g010.1
GO:0015706	nitrate transport	biological_process	17	6179	82	55481	0.003548976	0.016514956	1.861491914	Cse_sc002327.1_g070.1; Cse_sc003350.1_g030.1; Cse_sc004009.1_g050.1; Cse_sc009891.1_g010.1; Cse_sc010291.1_g020.1; Cse_sc010893.1_g030.1; Cse_sc011688.1_g020.1; Cse_sc012919.1_g010.1; Cse_sc019056.1_g020.1; Cse_sc020211.1_g020.1; Cse_sc020437.1_g010.1; Cse_sc021019.1_g010.1; Cse_sc023130.1_g020.1; Cse_sc028009.1_g010.1; Cse_sc029550.1_g020.1; Cse_sc037579.1_g010.1; Cse_sc049011.1_g010.1
GO:0009826	unidimensional cell growth	biological_process	28	6179	155	55481	0.003593963	0.016704806	1.622005858	Cse_sc000700.1_g110.1; Cse_sc000946.1_g030.1; Cse_sc001060.1_g030.1; Cse_sc001808.1_g040.1; Cse_sc001986.1_g040.1; Cse_sc002381.1_g060.1; Cse_sc002467.1_g050.1; Cse_sc002644.1_g080.1; Cse_sc005323.1_g040.1; Cse_sc005377.1_g040.1; Cse_sc006014.1_g030.1; Cse_sc009533.1_g030.1; Cse_sc010048.1_g030.1; Cse_sc010430.1_g030.1; Cse_sc012504.1_g020.1; Cse_sc012911.1_g020.1; Cse_sc014001.1_g020.1; Cse_sc01…
GO:0006520	cellular amino acid metabolic process	biological_process	16	6179	76	55481	0.003689711	0.017129883	1.890307578	Cse_sc000889.1_g020.1; Cse_sc001853.1_g020.1; Cse_sc003099.1_g010.1; Cse_sc003421.1_g030.1; Cse_sc005906.1_g050.1; Cse_sc006323.1_g010.1; Cse_sc006435.1_g020.1; Cse_sc009326.1_g050.1; Cse_sc009513.1_g070.1; Cse_sc010460.1_g030.1; Cse_sc014030.1_g020.1; Cse_sc018832.1_g020.1; Cse_sc020466.1_g010.1; Cse_sc029819.1_g010.1; Cse_sc062855.1_g010.1; Cse_sc063774.1_g010.1
GO:0005905	clathrin-coated pit	cellular_component	11	6179	46	55481	0.003715574	0.017229896	2.147142847	Cse_sc001615.1_g080.1; Cse_sc002518.1_g030.1; Cse_sc008055.1_g040.1; Cse_sc008534.1_g030.1; Cse_sc009045.1_g020.1; Cse_sc015342.1_g020.1; Cse_sc020143.1_g020.1; Cse_sc023400.1_g010.1; Cse_sc034221.1_g020.1; Cse_sc046981.1_g020.1; Cse_sc050968.1_g020.1
GO:0019432	triglyceride biosynthetic process	biological_process	15	6179	70	55481	0.003803728	0.017597759	1.924063071	Cse_sc000241.1_g180.1; Cse_sc000580.1_g060.1; Cse_sc001218.1_g020.1; Cse_sc002216.1_g020.1; Cse_sc002216.1_g040.1; Cse_sc003163.1_g060.1; Cse_sc006565.1_g060.1; Cse_sc006912.1_g020.1; Cse_sc007076.1_g020.1; Cse_sc008234.1_g020.1; Cse_sc010384.1_g080.1; Cse_sc012134.1_g030.1; Cse_sc014375.1_g030.1; Cse_sc019218.1_g030.1; Cse_sc027016.1_g010.1
GO:0008360	regulation of cell shape	biological_process	15	6179	70	55481	0.003803728	0.017597759	1.924063071	Cse_sc000805.1_g070.1; Cse_sc000989.1_g040.1; Cse_sc001713.1_g030.1; Cse_sc002399.1_g050.1; Cse_sc003456.1_g030.1; Cse_sc005301.1_g030.1; Cse_sc005503.1_g050.1; Cse_sc005732.1_g060.1; Cse_sc006606.1_g040.1; Cse_sc009315.1_g020.1; Cse_sc009429.1_g020.1; Cse_sc010730.1_g050.1; Cse_sc018106.1_g010.1; Cse_sc042925.1_g020.1; Cse_sc051184.1_g010.1
GO:0019748	secondary metabolic process	biological_process	12	6179	52	55481	0.003855283	0.017815607	2.072067922	Cse_sc000001.1_g110.1; Cse_sc000025.1_g080.1; Cse_sc000269.1_g040.1; Cse_sc000884.1_g040.1; Cse_sc002645.1_g060.1; Cse_sc002759.1_g030.1; Cse_sc003002.1_g030.1; Cse_sc003249.1_g070.1; Cse_sc006852.1_g010.1; Cse_sc010383.1_g020.1; Cse_sc015962.1_g020.1; Cse_sc040767.1_g010.1
GO:0005375	copper ion transmembrane transporter activity	molecular_function	5	6179	15	55481	0.003900046	0.017980791	2.992986999	Cse_sc000166.1_g010.1; Cse_sc004645.1_g030.1; Cse_sc008196.1_g010.1; Cse_sc013511.1_g020.1; Cse_sc036136.1_g010.1
GO:0070402	NADPH binding	molecular_function	5	6179	15	55481	0.003900046	0.017980791	2.992986999	Cse_sc002909.1_g010.1; Cse_sc008379.1_g070.1; Cse_sc015676.1_g030.1; Cse_sc039320.1_g010.1; Cse_sc041927.1_g010.1
GO:0048366	leaf development	biological_process	34	6179	198	55481	0.003951754	0.018198147	1.541841787	Cse_sc000082.1_g120.1; Cse_sc000095.1_g140.1; Cse_sc000487.1_g090.1; Cse_sc000792.1_g090.1; Cse_sc001131.1_g110.1; Cse_sc001235.1_g010.1; Cse_sc001794.1_g030.1; Cse_sc002467.1_g050.1; Cse_sc002571.1_g060.1; Cse_sc002781.1_g020.1; Cse_sc002781.1_g030.1; Cse_sc005158.1_g020.1; Cse_sc006446.1_g050.1; Cse_sc006912.1_g020.1; Cse_sc007302.1_g020.1; Cse_sc007587.1_g010.1; Cse_sc007648.1_g030.1; Cse_sc00…
GO:0000977	RNA polymerase II regulatory region sequence-specific DNA binding	molecular_function	23	6179	122	55481	0.003963433	0.018230878	1.692754942	Cse_sc000102.1_g110.1; Cse_sc000289.1_g110.1; Cse_sc000306.1_g020.1; Cse_sc002997.1_g030.1; Cse_sc005132.1_g030.1; Cse_sc005226.1_g020.1; Cse_sc005228.1_g020.1; Cse_sc005536.1_g060.1; Cse_sc005536.1_g070.1; Cse_sc006661.1_g030.1; Cse_sc008251.1_g020.1; Cse_sc009032.1_g010.1; Cse_sc010557.1_g020.1; Cse_sc012971.1_g050.1; Cse_sc013268.1_g040.1; Cse_sc014720.1_g030.1; Cse_sc015774.1_g010.1; Cse_sc01…
GO:0010037	response to carbon dioxide	biological_process	3	6179	7	55481	0.004071913	0.018286926	3.848126142	Cse_sc000586.1_g080.1; Cse_sc010544.1_g050.1; Cse_sc017754.1_g030.1
GO:0098687	chromosomal region	cellular_component	3	6179	7	55481	0.004071913	0.018286926	3.848126142	Cse_sc001178.1_g050.1; Cse_sc005824.1_g050.1; Cse_sc007243.1_g020.1
GO:1902395	regulation of 1-deoxy-D-xylulose-5-phosphate synthase activity	biological_process	3	6179	7	55481	0.004071913	0.018286926	3.848126142	Cse_sc001772.1_g110.1; Cse_sc012708.1_g020.1; Cse_sc013626.1_g040.1
GO:0080024	indolebutyric acid metabolic process	biological_process	3	6179	7	55481	0.004071913	0.018286926	3.848126142	Cse_sc001845.1_g010.1; Cse_sc001845.1_g020.1; Cse_sc010680.1_g030.1
GO:0019433	triglyceride catabolic process	biological_process	3	6179	7	55481	0.004071913	0.018286926	3.848126142	Cse_sc002590.1_g010.1; Cse_sc020797.1_g010.1; Cse_sc026804.1_g010.1
GO:0015193	L-proline transmembrane transporter activity	molecular_function	3	6179	7	55481	0.004071913	0.018286926	3.848126142	Cse_sc002728.1_g020.1; Cse_sc010432.1_g010.1; Cse_sc027050.1_g030.1
GO:0090603	sieve element differentiation	biological_process	3	6179	7	55481	0.004071913	0.018286926	3.848126142	Cse_sc004048.1_g040.1; Cse_sc007302.1_g020.1; Cse_sc011327.1_g030.1
GO:0016572	histone phosphorylation	biological_process	3	6179	7	55481	0.004071913	0.018286926	3.848126142	Cse_sc005621.1_g040.1; Cse_sc015050.1_g020.1; Cse_sc034145.1_g020.1
GO:0035175	histone kinase activity (H3-S10 specific)	molecular_function	3	6179	7	55481	0.004071913	0.018286926	3.848126142	Cse_sc005621.1_g040.1; Cse_sc015050.1_g020.1; Cse_sc034145.1_g020.1
GO:0045552	dihydrokaempferol 4-reductase activity	molecular_function	3	6179	7	55481	0.004071913	0.018286926	3.848126142	Cse_sc007092.1_g070.1; Cse_sc026481.1_g040.1; Cse_sc066161.1_g010.1
GO:0047890	flavanone 4-reductase activity	molecular_function	3	6179	7	55481	0.004071913	0.018286926	3.848126142	Cse_sc007092.1_g070.1; Cse_sc026481.1_g040.1; Cse_sc066161.1_g010.1
GO:0004714	transmembrane receptor protein tyrosine kinase activity	molecular_function	3	6179	7	55481	0.004071913	0.018286926	3.848126142	Cse_sc008007.1_g050.1; Cse_sc038290.1_g020.1; Cse_sc073221.1_g010.1
GO:0017046	peptide hormone binding	molecular_function	3	6179	7	55481	0.004071913	0.018286926	3.848126142	Cse_sc008007.1_g050.1; Cse_sc038290.1_g020.1; Cse_sc073221.1_g010.1
GO:0071617	lysophospholipid acyltransferase activity	molecular_function	3	6179	7	55481	0.004071913	0.018286926	3.848126142	Cse_sc008143.1_g060.1; Cse_sc008979.1_g040.1; Cse_sc021865.1_g030.1
GO:0055038	recycling endosome membrane	cellular_component	3	6179	7	55481	0.004071913	0.018286926	3.848126142	Cse_sc009120.1_g030.1; Cse_sc014119.1_g010.1; Cse_sc027600.1_g010.1
GO:0016790	thiolester hydrolase activity	molecular_function	3	6179	7	55481	0.004071913	0.018286926	3.848126142	Cse_sc012142.1_g030.1; Cse_sc015770.1_g020.1; Cse_sc018526.1_g010.1
GO:0005093	Rab GDP-dissociation inhibitor activity	molecular_function	3	6179	7	55481	0.004071913	0.018286926	3.848126142	Cse_sc012507.1_g010.1; Cse_sc018554.1_g020.1; Cse_sc030700.1_g010.1
GO:0015168	glycerol transmembrane transporter activity	molecular_function	3	6179	7	55481	0.004071913	0.018286926	3.848126142	Cse_sc014651.1_g010.1; Cse_sc014651.1_g020.1; Cse_sc014651.1_g030.1
GO:0004412	homoserine dehydrogenase activity	molecular_function	3	6179	7	55481	0.004071913	0.018286926	3.848126142	Cse_sc015030.1_g010.1; Cse_sc032334.1_g010.1; Cse_sc045278.1_g010.1
GO:0046513	ceramide biosynthetic process	biological_process	3	6179	7	55481	0.004071913	0.018286926	3.848126142	Cse_sc028654.1_g020.1; Cse_sc034588.1_g030.1; Cse_sc198888.1_g010.1
GO:0080027	response to herbivore	biological_process	3	6179	7	55481	0.004071913	0.018286926	3.848126142	Cse_sc032302.1_g010.1; Cse_sc057168.1_g010.1; Cse_sc063544.1_g010.1
GO:0004620	phospholipase activity	molecular_function	10	6179	41	55481	0.004258775	0.019104608	2.189990487	Cse_sc002278.1_g010.1; Cse_sc009581.1_g010.1; Cse_sc012379.1_g010.1; Cse_sc014872.1_g010.1; Cse_sc017424.1_g040.1; Cse_sc018058.1_g010.1; Cse_sc020866.1_g030.1; Cse_sc022020.1_g020.1; Cse_sc029495.1_g030.1; Cse_sc030452.1_g010.1
GO:0047259	glucomannan 4-beta-mannosyltransferase activity	molecular_function	6	6179	20	55481	0.004404408	0.019586727	2.693688299	Cse_sc000170.1_g100.1; Cse_sc001759.1_g030.1; Cse_sc007079.1_g060.1; Cse_sc007214.1_g060.1; Cse_sc007936.1_g040.1; Cse_sc065881.1_g010.1
GO:2000114	regulation of establishment of cell polarity	biological_process	6	6179	20	55481	0.004404408	0.019586727	2.693688299	Cse_sc000429.1_g040.1; Cse_sc001060.1_g030.1; Cse_sc012911.1_g020.1; Cse_sc014001.1_g020.1; Cse_sc014514.1_g030.1; Cse_sc026658.1_g010.1
GO:0008271	secondary active sulfate transmembrane transporter activity	molecular_function	6	6179	20	55481	0.004404408	0.019586727	2.693688299	Cse_sc001103.1_g020.1; Cse_sc002045.1_g030.1; Cse_sc003030.1_g100.1; Cse_sc007547.1_g010.1; Cse_sc011236.1_g020.1; Cse_sc013536.1_g010.1
GO:0006572	tyrosine catabolic process	biological_process	6	6179	20	55481	0.004404408	0.019586727	2.693688299	Cse_sc002207.1_g080.1; Cse_sc003230.1_g030.1; Cse_sc008903.1_g020.1; Cse_sc015783.1_g040.1; Cse_sc020225.1_g010.1; Cse_sc027823.1_g010.1
GO:0008559	xenobiotic transmembrane transporting ATPase activity	molecular_function	15	6179	71	55481	0.00441208	0.019586727	1.896963591	Cse_sc000037.1_g080.1; Cse_sc000138.1_g100.1; Cse_sc000296.1_g050.1; Cse_sc001434.1_g040.1; Cse_sc002354.1_g020.1; Cse_sc004159.1_g060.1; Cse_sc006330.1_g020.1; Cse_sc006641.1_g020.1; Cse_sc013661.1_g050.1; Cse_sc029015.1_g020.1; Cse_sc039342.1_g020.1; Cse_sc049173.1_g020.1; Cse_sc102353.1_g010.1; Cse_sc135211.1_g010.1; Cse_sc219489.1_g010.1
GO:0050269	coniferyl-aldehyde dehydrogenase activity	molecular_function	4	6179	11	55481	0.004428487	0.019586727	3.265076726	Cse_sc000257.1_g050.1; Cse_sc004060.1_g050.1; Cse_sc007378.1_g040.1; Cse_sc010378.1_g060.1
GO:0006561	proline biosynthetic process	biological_process	4	6179	11	55481	0.004428487	0.019586727	3.265076726	Cse_sc002078.1_g070.1; Cse_sc008610.1_g020.1; Cse_sc010380.1_g020.1; Cse_sc016333.1_g010.1
GO:0008477	purine nucleosidase activity	molecular_function	4	6179	11	55481	0.004428487	0.019586727	3.265076726	Cse_sc006527.1_g050.1; Cse_sc020412.1_g040.1; Cse_sc022934.1_g030.1; Cse_sc036356.1_g010.1
GO:0001664	G protein-coupled receptor binding	molecular_function	4	6179	11	55481	0.004428487	0.019586727	3.265076726	Cse_sc015008.1_g030.1; Cse_sc028587.1_g020.1; Cse_sc030580.1_g020.1; Cse_sc050371.1_g010.1
GO:0007188	adenylate cyclase-modulating G protein-coupled receptor signaling pathway	biological_process	4	6179	11	55481	0.004428487	0.019586727	3.265076726	Cse_sc015008.1_g030.1; Cse_sc028587.1_g020.1; Cse_sc030580.1_g020.1; Cse_sc050371.1_g010.1
GO:0009937	regulation of gibberellic acid mediated signaling pathway	biological_process	4	6179	11	55481	0.004428487	0.019586727	3.265076726	Cse_sc017818.1_g010.1; Cse_sc017818.1_g060.1; Cse_sc047590.1_g010.1; Cse_sc047590.1_g020.1
GO:0015996	chlorophyll catabolic process	biological_process	7	6179	25	55481	0.00443992	0.019586727	2.514109079	Cse_sc000639.1_g140.1; Cse_sc000639.1_g170.1; Cse_sc001071.1_g030.1; Cse_sc004388.1_g010.1; Cse_sc011201.1_g030.1; Cse_sc013674.1_g010.1; Cse_sc058463.1_g020.1
GO:0004097	catechol oxidase activity	molecular_function	7	6179	25	55481	0.00443992	0.019586727	2.514109079	Cse_sc000820.1_g060.1; Cse_sc006563.1_g030.1; Cse_sc018132.1_g010.1; Cse_sc027024.1_g020.1; Cse_sc027584.1_g010.1; Cse_sc030429.1_g010.1; Cse_sc057471.1_g010.1
GO:0046148	pigment biosynthetic process	biological_process	7	6179	25	55481	0.00443992	0.019586727	2.514109079	Cse_sc000820.1_g060.1; Cse_sc006563.1_g030.1; Cse_sc018132.1_g010.1; Cse_sc027024.1_g020.1; Cse_sc027584.1_g010.1; Cse_sc030429.1_g010.1; Cse_sc057471.1_g010.1
GO:0043086	negative regulation of catalytic activity	biological_process	7	6179	25	55481	0.00443992	0.019586727	2.514109079	Cse_sc003577.1_g050.1; Cse_sc004736.1_g010.1; Cse_sc004736.1_g020.1; Cse_sc004884.1_g030.1; Cse_sc006158.1_g050.1; Cse_sc010623.1_g030.1; Cse_sc026766.1_g010.1
GO:0034765	regulation of ion transmembrane transport	biological_process	14	6179	65	55481	0.004533689	0.019956239	1.933930061	Cse_sc001041.1_g130.1; Cse_sc001274.1_g100.1; Cse_sc002879.1_g050.1; Cse_sc003315.1_g020.1; Cse_sc003797.1_g090.1; Cse_sc004057.1_g010.1; Cse_sc009739.1_g020.1; Cse_sc010589.1_g020.1; Cse_sc028545.1_g010.1; Cse_sc028900.1_g010.1; Cse_sc030850.1_g010.1; Cse_sc044001.1_g010.1; Cse_sc053024.1_g010.1; Cse_sc053024.1_g020.1
GO:0080142	regulation of salicylic acid biosynthetic process	biological_process	14	6179	65	55481	0.004533689	0.019956239	1.933930061	Cse_sc001192.1_g050.1; Cse_sc003082.1_g060.1; Cse_sc007795.1_g070.1; Cse_sc008714.1_g010.1; Cse_sc009911.1_g020.1; Cse_sc011900.1_g010.1; Cse_sc012454.1_g040.1; Cse_sc012454.1_g050.1; Cse_sc023128.1_g010.1; Cse_sc027269.1_g020.1; Cse_sc032223.1_g010.1; Cse_sc041996.1_g030.1; Cse_sc045975.1_g010.1; Cse_sc052473.1_g010.1
GO:0004565	beta-galactosidase activity	molecular_function	12	6179	53	55481	0.00459654	0.020210588	2.032972301	Cse_sc001152.1_g070.1; Cse_sc001220.1_g050.1; Cse_sc001390.1_g040.1; Cse_sc001578.1_g080.1; Cse_sc001578.1_g120.1; Cse_sc001873.1_g110.1; Cse_sc004684.1_g020.1; Cse_sc013490.1_g030.1; Cse_sc016213.1_g010.1; Cse_sc028122.1_g020.1; Cse_sc047467.1_g010.1; Cse_sc056145.1_g010.1
GO:0009832	plant-type cell wall biogenesis	biological_process	19	6179	97	55481	0.004691241	0.020604261	1.758765556	Cse_sc000088.1_g130.1; Cse_sc000564.1_g020.1; Cse_sc001090.1_g030.1; Cse_sc002862.1_g060.1; Cse_sc003364.1_g070.1; Cse_sc003766.1_g010.1; Cse_sc004096.1_g110.1; Cse_sc005804.1_g020.1; Cse_sc006473.1_g010.1; Cse_sc009298.1_g040.1; Cse_sc012398.1_g040.1; Cse_sc012628.1_g020.1; Cse_sc017118.1_g030.1; Cse_sc019962.1_g010.1; Cse_sc022607.1_g030.1; Cse_sc024569.1_g010.1; Cse_sc028328.1_g010.1; Cse_sc03…
GO:0005262	calcium channel activity	molecular_function	28	6179	158	55481	0.00476685	0.020876563	1.591208278	Cse_sc000464.1_g040.1; Cse_sc000660.1_g020.1; Cse_sc000744.1_g040.1; Cse_sc000826.1_g010.1; Cse_sc000830.1_g090.1; Cse_sc000927.1_g010.1; Cse_sc002195.1_g040.1; Cse_sc005553.1_g090.1; Cse_sc006436.1_g070.1; Cse_sc008382.1_g040.1; Cse_sc010146.1_g020.1; Cse_sc010936.1_g040.1; Cse_sc012781.1_g030.1; Cse_sc014081.1_g010.1; Cse_sc014081.1_g050.1; Cse_sc016595.1_g010.1; Cse_sc017038.1_g030.1; Cse_sc01…
GO:0016757	transferase activity, transferring glycosyl groups	molecular_function	28	6179	158	55481	0.00476685	0.020876563	1.591208278	Cse_sc000653.1_g060.1; Cse_sc000829.1_g070.1; Cse_sc002465.1_g050.1; Cse_sc002977.1_g040.1; Cse_sc003594.1_g040.1; Cse_sc009173.1_g030.1; Cse_sc010366.1_g020.1; Cse_sc012640.1_g040.1; Cse_sc013024.1_g040.1; Cse_sc013527.1_g010.1; Cse_sc014914.1_g020.1; Cse_sc015803.1_g030.1; Cse_sc016890.1_g040.1; Cse_sc017855.1_g010.1; Cse_sc018284.1_g010.1; Cse_sc020465.1_g030.1; Cse_sc021016.1_g020.1; Cse_sc02…
GO:0009555	pollen development	biological_process	57	6179	370	55481	0.004820643	0.020876563	1.383245343	Cse_sc000408.1_g130.1; Cse_sc000677.1_g030.1; Cse_sc000732.1_g040.1; Cse_sc000804.1_g010.1; Cse_sc000928.1_g050.1; Cse_sc001164.1_g040.1; Cse_sc001288.1_g100.1; Cse_sc001399.1_g060.1; Cse_sc001748.1_g090.1; Cse_sc002392.1_g030.1; Cse_sc002457.1_g030.1; Cse_sc002838.1_g030.1; Cse_sc002875.1_g050.1; Cse_sc003027.1_g030.1; Cse_sc003199.1_g030.1; Cse_sc003321.1_g010.1; Cse_sc003682.1_g030.1; Cse_sc00…
GO:0048825	cotyledon development	biological_process	9	6179	36	55481	0.004821804	0.020876563	2.244740249	Cse_sc001966.1_g010.1; Cse_sc001966.1_g030.1; Cse_sc002781.1_g030.1; Cse_sc003585.1_g060.1; Cse_sc006736.1_g050.1; Cse_sc011915.1_g020.1; Cse_sc024400.1_g010.1; Cse_sc030932.1_g010.1; Cse_sc036401.1_g010.1
GO:0010119	regulation of stomatal movement	biological_process	20	6179	104	55481	0.004937247	0.020876563	1.726723269	Cse_sc000002.1_g140.1; Cse_sc000264.1_g050.1; Cse_sc000409.1_g070.1; Cse_sc000539.1_g150.1; Cse_sc000597.1_g040.1; Cse_sc000681.1_g060.1; Cse_sc006912.1_g020.1; Cse_sc008134.1_g050.1; Cse_sc008237.1_g050.1; Cse_sc008373.1_g020.1; Cse_sc008501.1_g030.1; Cse_sc011300.1_g020.1; Cse_sc018784.1_g010.1; Cse_sc020853.1_g020.1; Cse_sc022651.1_g020.1; Cse_sc027414.1_g010.1; Cse_sc028235.1_g010.1; Cse_sc02…
GO:0045786	negative regulation of cell cycle	biological_process	2	6179	4	55481	0.005062095	0.020876563	4.489480498	Cse_sc000089.1_g070.1; Cse_sc023456.1_g010.1
GO:0045839	negative regulation of mitotic nuclear division	biological_process	2	6179	4	55481	0.005062095	0.020876563	4.489480498	Cse_sc000089.1_g070.1; Cse_sc023456.1_g010.1
GO:1903508	positive regulation of nucleic acid-templated transcription	biological_process	2	6179	4	55481	0.005062095	0.020876563	4.489480498	Cse_sc000095.1_g140.1; Cse_sc000641.1_g030.1
GO:0009310	amine catabolic process	biological_process	2	6179	4	55481	0.005062095	0.020876563	4.489480498	Cse_sc000133.1_g050.1; Cse_sc003845.1_g020.1
GO:0042764	ascospore-type prospore	cellular_component	2	6179	4	55481	0.005062095	0.020876563	4.489480498	Cse_sc000133.1_g050.1; Cse_sc003845.1_g020.1
GO:0005835	fatty acid synthase complex	cellular_component	2	6179	4	55481	0.005062095	0.020876563	4.489480498	Cse_sc000141.1_g040.1; Cse_sc014627.1_g020.1
GO:0045487	gibberellin catabolic process	biological_process	2	6179	4	55481	0.005062095	0.020876563	4.489480498	Cse_sc000223.1_g120.1; Cse_sc027006.1_g010.1
GO:0046622	positive regulation of organ growth	biological_process	2	6179	4	55481	0.005062095	0.020876563	4.489480498	Cse_sc000343.1_g040.1; Cse_sc003020.1_g020.1
GO:0030139	endocytic vesicle	cellular_component	2	6179	4	55481	0.005062095	0.020876563	4.489480498	Cse_sc000409.1_g010.1; Cse_sc038821.1_g010.1
GO:0006558	L-phenylalanine metabolic process	biological_process	2	6179	4	55481	0.005062095	0.020876563	4.489480498	Cse_sc000604.1_g050.1; Cse_sc018968.1_g020.1
GO:0006568	tryptophan metabolic process	biological_process	2	6179	4	55481	0.005062095	0.020876563	4.489480498	Cse_sc000604.1_g050.1; Cse_sc018968.1_g020.1
GO:0006570	tyrosine metabolic process	biological_process	2	6179	4	55481	0.005062095	0.020876563	4.489480498	Cse_sc000604.1_g050.1; Cse_sc018968.1_g020.1
GO:0010326	methionine-oxo-acid transaminase activity	molecular_function	2	6179	4	55481	0.005062095	0.020876563	4.489480498	Cse_sc000604.1_g050.1; Cse_sc018968.1_g020.1
GO:1901997	negative regulation of indoleacetic acid biosynthetic process via tryptophan	biological_process	2	6179	4	55481	0.005062095	0.020876563	4.489480498	Cse_sc000604.1_g050.1; Cse_sc018968.1_g020.1
GO:0006788	heme oxidation	biological_process	2	6179	4	55481	0.005062095	0.020876563	4.489480498	Cse_sc000681.1_g060.1; Cse_sc028235.1_g010.1
GO:0072488	ammonium transmembrane transport	biological_process	2	6179	4	55481	0.005062095	0.020876563	4.489480498	Cse_sc000913.1_g050.1; Cse_sc016337.1_g030.1
GO:0036449	microtubule minus-end	cellular_component	2	6179	4	55481	0.005062095	0.020876563	4.489480498	Cse_sc000989.1_g040.1; Cse_sc018106.1_g010.1
GO:0015379	potassium:chloride symporter activity	molecular_function	2	6179	4	55481	0.005062095	0.020876563	4.489480498	Cse_sc001138.1_g030.1; Cse_sc007981.1_g070.1
GO:0055064	chloride ion homeostasis	biological_process	2	6179	4	55481	0.005062095	0.020876563	4.489480498	Cse_sc001138.1_g030.1; Cse_sc007981.1_g070.1
GO:0080165	callose deposition in phloem sieve plate	biological_process	2	6179	4	55481	0.005062095	0.020876563	4.489480498	Cse_sc001317.1_g020.1; Cse_sc020456.1_g030.1
GO:0099636	cytoplasmic streaming	biological_process	2	6179	4	55481	0.005062095	0.020876563	4.489480498	Cse_sc002679.1_g040.1; Cse_sc002945.1_g030.1
GO:0003866	3-phosphoshikimate 1-carboxyvinyltransferase activity	molecular_function	2	6179	4	55481	0.005062095	0.020876563	4.489480498	Cse_sc002868.1_g020.1; Cse_sc042061.1_g010.1
GO:0102339	3-oxo-arachidoyl-CoA reductase activity	molecular_function	2	6179	4	55481	0.005062095	0.020876563	4.489480498	Cse_sc003566.1_g010.1; Cse_sc047023.1_g010.1
GO:0102340	3-oxo-behenoyl-CoA reductase activity	molecular_function	2	6179	4	55481	0.005062095	0.020876563	4.489480498	Cse_sc003566.1_g010.1; Cse_sc047023.1_g010.1
GO:0102341	3-oxo-lignoceroyl-CoA reductase activity	molecular_function	2	6179	4	55481	0.005062095	0.020876563	4.489480498	Cse_sc003566.1_g010.1; Cse_sc047023.1_g010.1
GO:0102342	3-oxo-cerotoyl-CoA reductase activity	molecular_function	2	6179	4	55481	0.005062095	0.020876563	4.489480498	Cse_sc003566.1_g010.1; Cse_sc047023.1_g010.1
GO:0010608	posttranscriptional regulation of gene expression	biological_process	2	6179	4	55481	0.005062095	0.020876563	4.489480498	Cse_sc005434.1_g040.1; Cse_sc007253.1_g060.1
GO:0009755	hormone-mediated signaling pathway	biological_process	2	6179	4	55481	0.005062095	0.020876563	4.489480498	Cse_sc006189.1_g010.1; Cse_sc019535.1_g030.1
GO:0019483	beta-alanine biosynthetic process	biological_process	2	6179	4	55481	0.005062095	0.020876563	4.489480498	Cse_sc006206.1_g020.1; Cse_sc019442.1_g040.1
GO:1990380	Lys48-specific deubiquitinase activity	molecular_function	2	6179	4	55481	0.005062095	0.020876563	4.489480498	Cse_sc006840.1_g070.1; Cse_sc024317.1_g010.1
GO:0102803	thebane O-demethylase activity	molecular_function	2	6179	4	55481	0.005062095	0.020876563	4.489480498	Cse_sc007070.1_g030.1; Cse_sc027494.1_g020.1
GO:0102805	codeine O-demethylase activity	molecular_function	2	6179	4	55481	0.005062095	0.020876563	4.489480498	Cse_sc007070.1_g030.1; Cse_sc027494.1_g020.1
GO:0006110	regulation of glycolytic process	biological_process	2	6179	4	55481	0.005062095	0.020876563	4.489480498	Cse_sc007076.1_g020.1; Cse_sc008234.1_g020.1
GO:0004830	tryptophan-tRNA ligase activity	molecular_function	2	6179	4	55481	0.005062095	0.020876563	4.489480498	Cse_sc008101.1_g010.1; Cse_sc052343.1_g010.1
GO:0006436	tryptophanyl-tRNA aminoacylation	biological_process	2	6179	4	55481	0.005062095	0.020876563	4.489480498	Cse_sc008101.1_g010.1; Cse_sc052343.1_g010.1
GO:0070566	adenylyltransferase activity	molecular_function	2	6179	4	55481	0.005062095	0.020876563	4.489480498	Cse_sc008134.1_g050.1; Cse_sc018784.1_g010.1
GO:0080123	jasmonate-amino synthetase activity	molecular_function	2	6179	4	55481	0.005062095	0.020876563	4.489480498	Cse_sc008134.1_g050.1; Cse_sc018784.1_g010.1
GO:0009838	abscission	biological_process	2	6179	4	55481	0.005062095	0.020876563	4.489480498	Cse_sc008251.1_g020.1; Cse_sc041082.1_g030.1
GO:0016630	protochlorophyllide reductase activity	molecular_function	2	6179	4	55481	0.005062095	0.020876563	4.489480498	Cse_sc008257.1_g030.1; Cse_sc029094.1_g030.1
GO:0072660	maintenance of protein location in plasma membrane	biological_process	2	6179	4	55481	0.005062095	0.020876563	4.489480498	Cse_sc008373.1_g020.1; Cse_sc022651.1_g020.1
GO:0005290	L-histidine transmembrane transporter activity	molecular_function	2	6179	4	55481	0.005062095	0.020876563	4.489480498	Cse_sc010380.1_g020.1; Cse_sc016333.1_g010.1
GO:0090306	spindle assembly involved in meiosis	biological_process	2	6179	4	55481	0.005062095	0.020876563	4.489480498	Cse_sc012076.1_g020.1; Cse_sc012234.1_g010.1
GO:0015804	neutral amino acid transport	biological_process	2	6179	4	55481	0.005062095	0.020876563	4.489480498	Cse_sc012323.1_g020.1; Cse_sc045494.1_g020.1
GO:0004657	proline dehydrogenase activity	molecular_function	2	6179	4	55481	0.005062095	0.020876563	4.489480498	Cse_sc019782.1_g020.1; Cse_sc024615.1_g040.1
GO:0046423	allene-oxide cyclase activity	molecular_function	2	6179	4	55481	0.005062095	0.020876563	4.489480498	Cse_sc020754.1_g020.1; Cse_sc025817.1_g020.1
GO:0061656	SUMO conjugating enzyme activity	molecular_function	2	6179	4	55481	0.005062095	0.020876563	4.489480498	Cse_sc020873.1_g010.1; Cse_sc022254.1_g010.1
GO:1904526	regulation of microtubule binding	biological_process	2	6179	4	55481	0.005062095	0.020876563	4.489480498	Cse_sc022290.1_g020.1; Cse_sc022722.1_g040.1
GO:0050200	plasmalogen synthase activity	molecular_function	2	6179	4	55481	0.005062095	0.020876563	4.489480498	Cse_sc024568.1_g020.1; Cse_sc034964.1_g020.1
GO:0071618	lysophosphatidylethanolamine acyltransferase activity	molecular_function	2	6179	4	55481	0.005062095	0.020876563	4.489480498	Cse_sc024568.1_g020.1; Cse_sc034964.1_g020.1
GO:0060862	negative regulation of floral organ abscission	biological_process	2	6179	4	55481	0.005062095	0.020876563	4.489480498	Cse_sc027006.1_g010.1; Cse_sc032010.1_g010.1
GO:0008839	4-hydroxy-tetrahydrodipicolinate reductase	molecular_function	2	6179	4	55481	0.005062095	0.020876563	4.489480498	Cse_sc028477.1_g010.1; Cse_sc039320.1_g010.1
GO:0015184	L-cystine transmembrane transporter activity	molecular_function	2	6179	4	55481	0.005062095	0.020876563	4.489480498	Cse_sc030541.1_g030.1; Cse_sc031322.1_g010.1
GO:0015811	L-cystine transport	biological_process	2	6179	4	55481	0.005062095	0.020876563	4.489480498	Cse_sc030541.1_g030.1; Cse_sc031322.1_g010.1
GO:0080013	(E,E)-geranyllinalool synthase activity	molecular_function	2	6179	4	55481	0.005062095	0.020876563	4.489480498	Cse_sc032302.1_g010.1; Cse_sc057168.1_g010.1
GO:0046686	response to cadmium ion	biological_process	90	6179	626	55481	0.005096211	0.020995546	1.290904936	Cse_sc000012.1_g060.1; Cse_sc000395.1_g030.1; Cse_sc000512.1_g020.1; Cse_sc000570.1_g080.1; Cse_sc000788.1_g050.1; Cse_sc001052.1_g070.1; Cse_sc001345.1_g010.1; Cse_sc001617.1_g070.1; Cse_sc001664.1_g060.1; Cse_sc001687.1_g020.1; Cse_sc001748.1_g010.1; Cse_sc001790.1_g050.1; Cse_sc001794.1_g030.1; Cse_sc001898.1_g010.1; Cse_sc002189.1_g040.1; Cse_sc002288.1_g040.1; Cse_sc002591.1_g010.1; Cse_sc00…
GO:0042802	identical protein binding	molecular_function	53	6179	341	55481	0.005156229	0.021220888	1.395556988	Cse_sc000264.1_g050.1; Cse_sc000302.1_g030.1; Cse_sc000572.1_g040.1; Cse_sc000805.1_g060.1; Cse_sc001139.1_g040.1; Cse_sc002207.1_g080.1; Cse_sc003201.1_g050.1; Cse_sc003571.1_g070.1; Cse_sc004013.1_g030.1; Cse_sc004057.1_g010.1; Cse_sc004160.1_g050.1; Cse_sc004203.1_g040.1; Cse_sc004241.1_g050.1; Cse_sc004980.1_g010.1; Cse_sc005064.1_g020.1; Cse_sc005081.1_g020.1; Cse_sc006030.1_g060.1; Cse_sc00…
GO:0004568	chitinase activity	molecular_function	10	6179	42	55481	0.005199065	0.021375126	2.137847856	Cse_sc000318.1_g070.1; Cse_sc002466.1_g010.1; Cse_sc004362.1_g020.1; Cse_sc004368.1_g030.1; Cse_sc006131.1_g060.1; Cse_sc013218.1_g010.1; Cse_sc020864.1_g030.1; Cse_sc022438.1_g010.1; Cse_sc034606.1_g010.1; Cse_sc055693.1_g010.1
GO:0031090	organelle membrane	cellular_component	23	6179	125	55481	0.005446656	0.022369995	1.652128823	Cse_sc001743.1_g050.1; Cse_sc003292.1_g050.1; Cse_sc006068.1_g030.1; Cse_sc007769.1_g020.1; Cse_sc008044.1_g030.1; Cse_sc008379.1_g050.1; Cse_sc011036.1_g020.1; Cse_sc012106.1_g030.1; Cse_sc016000.1_g040.1; Cse_sc016630.1_g020.1; Cse_sc018840.1_g020.1; Cse_sc020506.1_g010.1; Cse_sc022394.1_g010.1; Cse_sc023738.1_g010.1; Cse_sc023769.1_g010.1; Cse_sc025749.1_g020.1; Cse_sc026995.1_g010.1; Cse_sc02…
GO:0042128	nitrate assimilation	biological_process	31	6179	181	55481	0.005644218	0.023157554	1.537833099	Cse_sc000002.1_g140.1; Cse_sc001232.1_g010.1; Cse_sc001555.1_g070.1; Cse_sc002327.1_g070.1; Cse_sc003465.1_g040.1; Cse_sc004009.1_g050.1; Cse_sc004841.1_g030.1; Cse_sc005028.1_g080.1; Cse_sc005040.1_g040.1; Cse_sc006036.1_g010.1; Cse_sc007258.1_g030.1; Cse_sc008361.1_g030.1; Cse_sc008628.1_g030.1; Cse_sc009642.1_g040.1; Cse_sc009860.1_g010.1; Cse_sc010793.1_g020.1; Cse_sc010893.1_g030.1; Cse_sc01…
GO:0030041	actin filament polymerization	biological_process	5	6179	16	55481	0.005657524	0.023188288	2.805925312	Cse_sc002324.1_g010.1; Cse_sc017689.1_g010.1; Cse_sc017775.1_g020.1; Cse_sc038029.1_g010.1; Cse_sc041933.1_g010.1
GO:0048359	mucilage metabolic process involved in seed coat development	biological_process	7	6179	26	55481	0.005795914	0.023731115	2.417412576	Cse_sc000244.1_g130.1; Cse_sc002278.1_g030.1; Cse_sc007079.1_g060.1; Cse_sc007214.1_g060.1; Cse_sc012950.1_g030.1; Cse_sc021705.1_g010.1; Cse_sc065881.1_g010.1
GO:0008654	phospholipid biosynthetic process	biological_process	9	6179	37	55481	0.005959256	0.024307286	2.184071594	Cse_sc000389.1_g020.1; Cse_sc001385.1_g030.1; Cse_sc001388.1_g070.1; Cse_sc004382.1_g020.1; Cse_sc015702.1_g010.1; Cse_sc021865.1_g030.1; Cse_sc024568.1_g020.1; Cse_sc031249.1_g020.1; Cse_sc034964.1_g020.1
GO:2000762	regulation of phenylpropanoid metabolic process	biological_process	6	6179	21	55481	0.0059793	0.024307286	2.565417428	Cse_sc000475.1_g010.1; Cse_sc001932.1_g060.1; Cse_sc002148.1_g030.1; Cse_sc005135.1_g010.1; Cse_sc009642.1_g020.1; Cse_sc014974.1_g030.1
GO:0045491	xylan metabolic process	biological_process	6	6179	21	55481	0.0059793	0.024307286	2.565417428	Cse_sc000528.1_g070.1; Cse_sc001438.1_g070.1; Cse_sc001572.1_g030.1; Cse_sc003564.1_g050.1; Cse_sc011115.1_g020.1; Cse_sc012217.1_g020.1
GO:0042594	response to starvation	biological_process	6	6179	21	55481	0.0059793	0.024307286	2.565417428	Cse_sc000808.1_g040.1; Cse_sc000850.1_g020.1; Cse_sc009076.1_g040.1; Cse_sc014271.1_g020.1; Cse_sc018863.1_g040.1; Cse_sc047936.1_g010.1
GO:0102391	decanoate-CoA ligase activity	molecular_function	6	6179	21	55481	0.0059793	0.024307286	2.565417428	Cse_sc001367.1_g030.1; Cse_sc001642.1_g080.1; Cse_sc003085.1_g050.1; Cse_sc015652.1_g020.1; Cse_sc026132.1_g020.1; Cse_sc066749.1_g010.1
GO:0080022	primary root development	biological_process	6	6179	21	55481	0.0059793	0.024307286	2.565417428	Cse_sc003321.1_g010.1; Cse_sc004141.1_g040.1; Cse_sc007028.1_g010.1; Cse_sc007822.1_g050.1; Cse_sc007911.1_g010.1; Cse_sc030208.1_g010.1
GO:0042939	tripeptide transport	biological_process	6	6179	21	55481	0.0059793	0.024307286	2.565417428	Cse_sc005725.1_g020.1; Cse_sc010291.1_g020.1; Cse_sc010471.1_g010.1; Cse_sc011688.1_g020.1; Cse_sc028009.1_g010.1; Cse_sc030518.1_g020.1
GO:0009877	nodulation	biological_process	14	6179	67	55481	0.00611049	0.02481531	1.876200805	Cse_sc000960.1_g030.1; Cse_sc002986.1_g020.1; Cse_sc005740.1_g030.1; Cse_sc011149.1_g020.1; Cse_sc014963.1_g010.1; Cse_sc019830.1_g030.1; Cse_sc019830.1_g050.1; Cse_sc023049.1_g010.1; Cse_sc024544.1_g020.1; Cse_sc028954.1_g030.1; Cse_sc029976.1_g020.1; Cse_sc048148.1_g020.1; Cse_sc048867.1_g020.1; Cse_sc302601.1_g010.1
GO:0010154	fruit development	biological_process	10	6179	43	55481	0.006295889	0.02552028	2.088130464	Cse_sc002506.1_g020.1; Cse_sc004717.1_g080.1; Cse_sc006374.1_g030.1; Cse_sc006528.1_g010.1; Cse_sc011972.1_g050.1; Cse_sc013674.1_g010.1; Cse_sc015774.1_g010.1; Cse_sc022605.1_g020.1; Cse_sc023298.1_g020.1; Cse_sc029081.1_g010.1
GO:0015238	drug transmembrane transporter activity	molecular_function	13	6179	61	55481	0.006303279	0.02552028	1.913549065	Cse_sc000009.1_g010.1; Cse_sc000570.1_g060.1; Cse_sc001414.1_g100.1; Cse_sc005704.1_g060.1; Cse_sc007552.1_g020.1; Cse_sc008626.1_g010.1; Cse_sc009397.1_g030.1; Cse_sc011798.1_g010.1; Cse_sc028197.1_g020.1; Cse_sc029625.1_g010.1; Cse_sc038482.1_g020.1; Cse_sc039260.1_g010.1; Cse_sc042110.1_g010.1
GO:0009932	cell tip growth	biological_process	13	6179	61	55481	0.006303279	0.02552028	1.913549065	Cse_sc000564.1_g020.1; Cse_sc001090.1_g030.1; Cse_sc003313.1_g050.1; Cse_sc006171.1_g050.1; Cse_sc006708.1_g010.1; Cse_sc011710.1_g010.1; Cse_sc011710.1_g030.1; Cse_sc014834.1_g030.1; Cse_sc016830.1_g020.1; Cse_sc019962.1_g010.1; Cse_sc022607.1_g030.1; Cse_sc033399.1_g030.1; Cse_sc041643.1_g020.1
GO:0009736	cytokinin-activated signaling pathway	biological_process	18	6179	93	55481	0.006376725	0.025791461	1.737863419	Cse_sc000291.1_g090.1; Cse_sc002781.1_g030.1; Cse_sc004141.1_g040.1; Cse_sc007449.1_g040.1; Cse_sc007648.1_g070.1; Cse_sc007911.1_g010.1; Cse_sc008501.1_g030.1; Cse_sc010602.1_g020.1; Cse_sc011262.1_g020.1; Cse_sc018079.1_g020.1; Cse_sc018154.1_g030.1; Cse_sc019552.1_g020.1; Cse_sc021551.1_g010.1; Cse_sc025294.1_g010.1; Cse_sc025584.1_g010.1; Cse_sc031115.1_g020.1; Cse_sc033280.1_g010.1; Cse_sc03…
GO:0000166	nucleotide binding	molecular_function	22	6179	120	55481	0.006552686	0.026476304	1.646142849	Cse_sc000851.1_g030.1; Cse_sc001076.1_g110.1; Cse_sc001348.1_g030.1; Cse_sc001476.1_g040.1; Cse_sc001696.1_g010.1; Cse_sc004299.1_g040.1; Cse_sc006385.1_g020.1; Cse_sc007015.1_g020.1; Cse_sc007116.1_g040.1; Cse_sc007434.1_g030.1; Cse_sc007770.1_g020.1; Cse_sc009160.1_g030.1; Cse_sc009230.1_g030.1; Cse_sc009591.1_g030.1; Cse_sc009591.1_g060.1; Cse_sc013362.1_g020.1; Cse_sc015063.1_g020.1; Cse_sc01…
GO:0005819	spindle	cellular_component	30	6179	176	55481	0.006724288	0.027142166	1.530504715	Cse_sc000221.1_g090.1; Cse_sc000234.1_g010.1; Cse_sc000700.1_g110.1; Cse_sc001566.1_g050.1; Cse_sc002571.1_g060.1; Cse_sc002781.1_g020.1; Cse_sc003661.1_g030.1; Cse_sc004328.1_g020.1; Cse_sc004509.1_g040.1; Cse_sc004789.1_g070.1; Cse_sc005621.1_g040.1; Cse_sc005960.1_g030.1; Cse_sc006014.1_g030.1; Cse_sc007587.1_g010.1; Cse_sc007677.1_g050.1; Cse_sc008168.1_g020.1; Cse_sc008771.1_g020.1; Cse_sc01…
GO:0004737	pyruvate decarboxylase activity	molecular_function	4	6179	12	55481	0.006900518	0.027546812	2.992986999	Cse_sc000206.1_g080.1; Cse_sc001094.1_g110.1; Cse_sc016830.1_g010.1; Cse_sc017761.1_g010.1
GO:0050342	tocopherol O-methyltransferase activity	molecular_function	4	6179	12	55481	0.006900518	0.027546812	2.992986999	Cse_sc001487.1_g030.1; Cse_sc045596.1_g010.1; Cse_sc241107.1_g010.1; Cse_sc241491.1_g010.1
GO:0009823	cytokinin catabolic process	biological_process	4	6179	12	55481	0.006900518	0.027546812	2.992986999	Cse_sc002022.1_g030.1; Cse_sc008490.1_g060.1; Cse_sc010248.1_g020.1; Cse_sc011286.1_g010.1
GO:0045604	regulation of epidermal cell differentiation	biological_process	4	6179	12	55481	0.006900518	0.027546812	2.992986999	Cse_sc003530.1_g020.1; Cse_sc030932.1_g010.1; Cse_sc048658.1_g010.1; Cse_sc055763.1_g010.1
GO:0006972	hyperosmotic response	biological_process	4	6179	12	55481	0.006900518	0.027546812	2.992986999	Cse_sc008723.1_g030.1; Cse_sc010380.1_g020.1; Cse_sc016333.1_g010.1; Cse_sc040157.1_g010.1
GO:0033358	UDP-L-arabinose biosynthetic process	biological_process	4	6179	12	55481	0.006900518	0.027546812	2.992986999	Cse_sc009298.1_g040.1; Cse_sc010957.1_g050.1; Cse_sc033847.1_g020.1; Cse_sc039349.1_g010.1
GO:0045227	capsule polysaccharide biosynthetic process	biological_process	4	6179	12	55481	0.006900518	0.027546812	2.992986999	Cse_sc009298.1_g040.1; Cse_sc010957.1_g050.1; Cse_sc033847.1_g020.1; Cse_sc039349.1_g010.1
GO:0050373	UDP-arabinose 4-epimerase activity	molecular_function	4	6179	12	55481	0.006900518	0.027546812	2.992986999	Cse_sc009298.1_g040.1; Cse_sc010957.1_g050.1; Cse_sc033847.1_g020.1; Cse_sc039349.1_g010.1
GO:0005834	heterotrimeric G-protein complex	cellular_component	4	6179	12	55481	0.006900518	0.027546812	2.992986999	Cse_sc015008.1_g030.1; Cse_sc028587.1_g020.1; Cse_sc030580.1_g020.1; Cse_sc050371.1_g010.1
GO:0006574	valine catabolic process	biological_process	4	6179	12	55481	0.006900518	0.027546812	2.992986999	Cse_sc017166.1_g030.1; Cse_sc018695.1_g020.1; Cse_sc020155.1_g010.1; Cse_sc020364.1_g010.1
GO:0070063	RNA polymerase binding	molecular_function	4	6179	12	55481	0.006900518	0.027546812	2.992986999	Cse_sc019341.1_g010.1; Cse_sc019341.1_g020.1; Cse_sc031162.1_g010.1; Cse_sc043884.1_g010.1
GO:0005813	centrosome	cellular_component	18	6179	94	55481	0.007176128	0.028618399	1.71937551	Cse_sc000462.1_g140.1; Cse_sc000700.1_g110.1; Cse_sc001060.1_g030.1; Cse_sc002781.1_g020.1; Cse_sc003661.1_g030.1; Cse_sc004524.1_g040.1; Cse_sc006014.1_g030.1; Cse_sc006030.1_g050.1; Cse_sc008761.1_g010.1; Cse_sc009402.1_g020.1; Cse_sc011254.1_g030.1; Cse_sc012911.1_g020.1; Cse_sc014001.1_g020.1; Cse_sc014205.1_g020.1; Cse_sc015192.1_g060.1; Cse_sc022014.1_g010.1; Cse_sc026658.1_g010.1; Cse_sc02…
GO:0031969	chloroplast membrane	cellular_component	46	6179	294	55481	0.007209684	0.028723498	1.404871448	Cse_sc000031.1_g090.1; Cse_sc000161.1_g030.1; Cse_sc000292.1_g070.1; Cse_sc000432.1_g030.1; Cse_sc000487.1_g090.1; Cse_sc000751.1_g020.1; Cse_sc000772.1_g060.1; Cse_sc001274.1_g050.1; Cse_sc001345.1_g010.1; Cse_sc001418.1_g070.1; Cse_sc001430.1_g100.1; Cse_sc001664.1_g060.1; Cse_sc002686.1_g030.1; Cse_sc003285.1_g010.1; Cse_sc003747.1_g070.1; Cse_sc004072.1_g020.1; Cse_sc004138.1_g060.1; Cse_sc00…
GO:1900994	(-)-secologanin biosynthetic process	biological_process	9	6179	38	55481	0.007295078	0.028899035	2.126596026	Cse_sc000863.1_g110.1; Cse_sc006700.1_g040.1; Cse_sc006700.1_g050.1; Cse_sc008588.1_g040.1; Cse_sc009355.1_g030.1; Cse_sc020149.1_g010.1; Cse_sc033735.1_g010.1; Cse_sc037929.1_g010.1; Cse_sc046371.1_g020.1
GO:0009933	meristem structural organization	biological_process	9	6179	38	55481	0.007295078	0.028899035	2.126596026	Cse_sc000939.1_g040.1; Cse_sc006528.1_g010.1; Cse_sc006661.1_g030.1; Cse_sc009032.1_g010.1; Cse_sc011972.1_g050.1; Cse_sc013253.1_g040.1; Cse_sc015098.1_g010.1; Cse_sc023298.1_g020.1; Cse_sc029081.1_g010.1
GO:0044209	AMP salvage	biological_process	3	6179	8	55481	0.007427661	0.028899035	3.367110374	Cse_sc000272.1_g010.1; Cse_sc001023.1_g100.1; Cse_sc004264.1_g020.1
GO:0004032	alditol:NADP+ 1-oxidoreductase activity	molecular_function	3	6179	8	55481	0.007427661	0.028899035	3.367110374	Cse_sc000311.1_g040.1; Cse_sc011745.1_g050.1; Cse_sc023188.1_g030.1
GO:0016229	steroid dehydrogenase activity	molecular_function	3	6179	8	55481	0.007427661	0.028899035	3.367110374	Cse_sc000311.1_g040.1; Cse_sc011745.1_g050.1; Cse_sc023188.1_g030.1
GO:0033500	carbohydrate homeostasis	biological_process	3	6179	8	55481	0.007427661	0.028899035	3.367110374	Cse_sc000919.1_g030.1; Cse_sc006483.1_g020.1; Cse_sc010602.1_g020.1
GO:0000323	lytic vacuole	cellular_component	3	6179	8	55481	0.007427661	0.028899035	3.367110374	Cse_sc001217.1_g070.1; Cse_sc009540.1_g030.1; Cse_sc021231.1_g040.1
GO:0046621	negative regulation of organ growth	biological_process	3	6179	8	55481	0.007427661	0.028899035	3.367110374	Cse_sc001844.1_g050.1; Cse_sc004288.1_g020.1; Cse_sc005633.1_g050.1
GO:0009954	proximal/distal pattern formation	biological_process	3	6179	8	55481	0.007427661	0.028899035	3.367110374	Cse_sc002099.1_g030.1; Cse_sc013039.1_g020.1; Cse_sc020053.1_g010.1
GO:0034504	protein localization to nucleus	biological_process	3	6179	8	55481	0.007427661	0.028899035	3.367110374	Cse_sc003530.1_g020.1; Cse_sc011605.1_g010.1; Cse_sc055763.1_g010.1
GO:0048572	short-day photoperiodism	biological_process	3	6179	8	55481	0.007427661	0.028899035	3.367110374	Cse_sc003553.1_g040.1; Cse_sc009863.1_g010.1; Cse_sc022197.1_g020.1
GO:0004142	diacylglycerol cholinephosphotransferase activity	molecular_function	3	6179	8	55481	0.007427661	0.028899035	3.367110374	Cse_sc006257.1_g020.1; Cse_sc018127.1_g030.1; Cse_sc028728.1_g010.1
GO:0006567	threonine catabolic process	biological_process	3	6179	8	55481	0.007427661	0.028899035	3.367110374	Cse_sc006517.1_g020.1; Cse_sc006857.1_g010.1; Cse_sc007536.1_g050.1
GO:0090548	response to nitrate starvation	biological_process	3	6179	8	55481	0.007427661	0.028899035	3.367110374	Cse_sc008007.1_g050.1; Cse_sc038290.1_g020.1; Cse_sc073221.1_g010.1
GO:1902025	nitrate import	biological_process	3	6179	8	55481	0.007427661	0.028899035	3.367110374	Cse_sc008007.1_g050.1; Cse_sc038290.1_g020.1; Cse_sc073221.1_g010.1
GO:0030658	transport vesicle membrane	cellular_component	3	6179	8	55481	0.007427661	0.028899035	3.367110374	Cse_sc009120.1_g030.1; Cse_sc014119.1_g010.1; Cse_sc027600.1_g010.1
GO:0043335	protein unfolding	biological_process	3	6179	8	55481	0.007427661	0.028899035	3.367110374	Cse_sc009666.1_g020.1; Cse_sc013335.1_g050.1; Cse_sc018696.1_g030.1
GO:0015334	high-affinity oligopeptide transmembrane transporter activity	molecular_function	3	6179	8	55481	0.007427661	0.028899035	3.367110374	Cse_sc010291.1_g020.1; Cse_sc011688.1_g020.1; Cse_sc028009.1_g010.1
GO:0015833	peptide transport	biological_process	3	6179	8	55481	0.007427661	0.028899035	3.367110374	Cse_sc010291.1_g020.1; Cse_sc011688.1_g020.1; Cse_sc028009.1_g010.1
GO:0043090	amino acid import	biological_process	3	6179	8	55481	0.007427661	0.028899035	3.367110374	Cse_sc010432.1_g010.1; Cse_sc021298.1_g010.1; Cse_sc025487.1_g010.1
GO:0008661	1-deoxy-D-xylulose-5-phosphate synthase activity	molecular_function	3	6179	8	55481	0.007427661	0.028899035	3.367110374	Cse_sc010683.1_g010.1; Cse_sc020708.1_g010.1; Cse_sc029146.1_g010.1
GO:0052865	1-deoxy-D-xylulose 5-phosphate biosynthetic process	biological_process	3	6179	8	55481	0.007427661	0.028899035	3.367110374	Cse_sc010683.1_g010.1; Cse_sc020708.1_g010.1; Cse_sc029146.1_g010.1
GO:0005460	UDP-glucose transmembrane transporter activity	molecular_function	3	6179	8	55481	0.007427661	0.028899035	3.367110374	Cse_sc014484.1_g010.1; Cse_sc035985.1_g010.1; Cse_sc046383.1_g010.1
GO:0043864	indoleacetamide hydrolase activity	molecular_function	3	6179	8	55481	0.007427661	0.028899035	3.367110374	Cse_sc017737.1_g010.1; Cse_sc018446.1_g010.1; Cse_sc018446.1_g020.1
GO:0010629	negative regulation of gene expression	biological_process	7	6179	27	55481	0.007444998	0.02891008	2.327878777	Cse_sc000641.1_g030.1; Cse_sc003802.1_g060.1; Cse_sc005117.1_g010.1; Cse_sc007253.1_g060.1; Cse_sc010865.1_g040.1; Cse_sc027006.1_g010.1; Cse_sc029764.1_g030.1
GO:0007052	mitotic spindle organization	biological_process	7	6179	27	55481	0.007444998	0.02891008	2.327878777	Cse_sc000971.1_g060.1; Cse_sc002781.1_g020.1; Cse_sc003182.1_g010.1; Cse_sc005621.1_g040.1; Cse_sc014205.1_g020.1; Cse_sc015050.1_g020.1; Cse_sc034145.1_g020.1
GO:0009817	defense response to fungus, incompatible interaction	biological_process	12	6179	56	55481	0.007527514	0.029202068	1.924063071	Cse_sc000149.1_g050.1; Cse_sc000149.1_g070.1; Cse_sc000403.1_g010.1; Cse_sc000477.1_g130.1; Cse_sc000512.1_g020.1; Cse_sc003595.1_g070.1; Cse_sc003851.1_g070.1; Cse_sc007334.1_g020.1; Cse_sc010509.1_g010.1; Cse_sc044160.1_g010.1; Cse_sc048047.1_g020.1; Cse_sc163611.1_g010.1
GO:0046854	phosphatidylinositol phosphorylation	biological_process	10	6179	44	55481	0.007566073	0.029323129	2.040672954	Cse_sc001186.1_g070.1; Cse_sc001351.1_g030.1; Cse_sc001384.1_g180.1; Cse_sc001929.1_g020.1; Cse_sc016596.1_g040.1; Cse_sc017534.1_g050.1; Cse_sc020078.1_g020.1; Cse_sc026547.1_g010.1; Cse_sc032042.1_g010.1; Cse_sc040326.1_g010.1
GO:0000982	transcription factor activity, RNA polymerase II proximal promoter sequence-specific DNA binding	molecular_function	17	6179	88	55481	0.007694159	0.02979059	1.734572011	Cse_sc000102.1_g110.1; Cse_sc001525.1_g050.1; Cse_sc003942.1_g010.1; Cse_sc005228.1_g020.1; Cse_sc005536.1_g060.1; Cse_sc005536.1_g070.1; Cse_sc006661.1_g030.1; Cse_sc007199.1_g050.1; Cse_sc008251.1_g020.1; Cse_sc009032.1_g010.1; Cse_sc010557.1_g020.1; Cse_sc013268.1_g040.1; Cse_sc015774.1_g010.1; Cse_sc017636.1_g040.1; Cse_sc017768.1_g020.1; Cse_sc035291.1_g020.1; Cse_sc057861.1_g010.1
GO:0080147	root hair cell development	biological_process	5	6179	17	55481	0.007929347	0.030442153	2.640870881	Cse_sc000266.1_g030.1; Cse_sc000286.1_g040.1; Cse_sc004053.1_g050.1; Cse_sc005264.1_g020.1; Cse_sc021016.1_g020.1
GO:0004566	beta-glucuronidase activity	molecular_function	5	6179	17	55481	0.007929347	0.030442153	2.640870881	Cse_sc000959.1_g020.1; Cse_sc001609.1_g020.1; Cse_sc002644.1_g080.1; Cse_sc016407.1_g010.1; Cse_sc074774.1_g010.1
GO:0000146	microfilament motor activity	molecular_function	5	6179	17	55481	0.007929347	0.030442153	2.640870881	Cse_sc001514.1_g020.1; Cse_sc006532.1_g020.1; Cse_sc018422.1_g010.1; Cse_sc018873.1_g010.1; Cse_sc020894.1_g040.1
GO:0051640	organelle localization	biological_process	5	6179	17	55481	0.007929347	0.030442153	2.640870881	Cse_sc001514.1_g020.1; Cse_sc006532.1_g020.1; Cse_sc018422.1_g010.1; Cse_sc018873.1_g010.1; Cse_sc020894.1_g040.1
GO:0009684	indoleacetic acid biosynthetic process	biological_process	5	6179	17	55481	0.007929347	0.030442153	2.640870881	Cse_sc002631.1_g040.1; Cse_sc006323.1_g010.1; Cse_sc007503.1_g060.1; Cse_sc012106.1_g040.1; Cse_sc019860.1_g020.1
GO:0031640	killing of cells of other organism	biological_process	5	6179	17	55481	0.007929347	0.030442153	2.640870881	Cse_sc009034.1_g020.1; Cse_sc011599.1_g040.1; Cse_sc038635.1_g010.1; Cse_sc061203.1_g010.1; Cse_sc274390.1_g010.1
GO:0003978	UDP-glucose 4-epimerase activity	molecular_function	5	6179	17	55481	0.007929347	0.030442153	2.640870881	Cse_sc009298.1_g040.1; Cse_sc010957.1_g050.1; Cse_sc021787.1_g010.1; Cse_sc033847.1_g020.1; Cse_sc039349.1_g010.1
GO:0103075	indole-3-pyruvate monooxygenase activity	molecular_function	6	6179	22	55481	0.007938776	0.030442153	2.448807545	Cse_sc000197.1_g020.1; Cse_sc000197.1_g040.1; Cse_sc000523.1_g080.1; Cse_sc001482.1_g030.1; Cse_sc007029.1_g030.1; Cse_sc018332.1_g020.1
GO:0042937	tripeptide transmembrane transporter activity	molecular_function	6	6179	22	55481	0.007938776	0.030442153	2.448807545	Cse_sc005725.1_g020.1; Cse_sc010291.1_g020.1; Cse_sc010471.1_g010.1; Cse_sc011688.1_g020.1; Cse_sc028009.1_g010.1; Cse_sc030518.1_g020.1
GO:0042938	dipeptide transport	biological_process	6	6179	22	55481	0.007938776	0.030442153	2.448807545	Cse_sc005725.1_g020.1; Cse_sc010291.1_g020.1; Cse_sc010471.1_g010.1; Cse_sc011688.1_g020.1; Cse_sc028009.1_g010.1; Cse_sc030518.1_g020.1
GO:0055072	iron ion homeostasis	biological_process	14	6179	69	55481	0.008100601	0.031003069	1.821818173	Cse_sc001345.1_g010.1; Cse_sc001664.1_g060.1; Cse_sc002714.1_g010.1; Cse_sc003276.1_g040.1; Cse_sc005102.1_g020.1; Cse_sc005226.1_g020.1; Cse_sc010606.1_g020.1; Cse_sc016089.1_g010.1; Cse_sc016149.1_g010.1; Cse_sc019393.1_g030.1; Cse_sc029995.1_g010.1; Cse_sc039398.1_g010.1; Cse_sc039828.1_g010.1; Cse_sc095205.1_g010.1
GO:1900150	regulation of defense response to fungus	biological_process	14	6179	69	55481	0.008100601	0.031003069	1.821818173	Cse_sc001365.1_g020.1; Cse_sc002695.1_g090.1; Cse_sc003573.1_g030.1; Cse_sc003901.1_g050.1; Cse_sc004818.1_g060.1; Cse_sc011149.1_g020.1; Cse_sc013054.1_g010.1; Cse_sc024004.1_g030.1; Cse_sc025096.1_g010.1; Cse_sc028534.1_g010.1; Cse_sc029964.1_g030.1; Cse_sc030434.1_g010.1; Cse_sc040947.1_g010.1; Cse_sc042616.1_g010.1
GO:0050832	defense response to fungus	biological_process	108	6179	781	55481	0.008208932	0.031387558	1.241648896	Cse_sc000001.1_g170.1; Cse_sc000183.1_g080.1; Cse_sc000358.1_g080.1; Cse_sc000464.1_g040.1; Cse_sc000605.1_g090.1; Cse_sc000637.1_g030.1; Cse_sc000886.1_g010.1; Cse_sc000919.1_g030.1; Cse_sc000922.1_g050.1; Cse_sc001139.1_g040.1; Cse_sc001139.1_g050.1; Cse_sc001274.1_g050.1; Cse_sc001287.1_g110.1; Cse_sc001293.1_g020.1; Cse_sc001293.1_g040.1; Cse_sc001506.1_g110.1; Cse_sc001801.1_g120.1; Cse_sc00…
GO:0004712	protein serine/threonine/tyrosine kinase activity	molecular_function	19	6179	102	55481	0.008343804	0.031872691	1.672551558	Cse_sc000608.1_g040.1; Cse_sc000648.1_g050.1; Cse_sc000724.1_g020.1; Cse_sc002352.1_g050.1; Cse_sc002577.1_g070.1; Cse_sc002883.1_g040.1; Cse_sc003324.1_g040.1; Cse_sc003901.1_g050.1; Cse_sc004818.1_g060.1; Cse_sc009495.1_g030.1; Cse_sc010034.1_g030.1; Cse_sc012509.1_g010.1; Cse_sc015019.1_g010.1; Cse_sc019061.1_g030.1; Cse_sc024695.1_g010.1; Cse_sc028301.1_g010.1; Cse_sc028534.1_g010.1; Cse_sc02…
GO:0061077	chaperone-mediated protein folding	biological_process	8	6179	33	55481	0.008361179	0.031877994	2.176717817	Cse_sc000089.1_g100.1; Cse_sc000162.1_g110.1; Cse_sc001772.1_g110.1; Cse_sc004838.1_g040.1; Cse_sc005782.1_g030.1; Cse_sc008499.1_g020.1; Cse_sc012708.1_g020.1; Cse_sc013626.1_g040.1
GO:1901002	positive regulation of response to salt stress	biological_process	8	6179	33	55481	0.008361179	0.031877994	2.176717817	Cse_sc000644.1_g030.1; Cse_sc001457.1_g090.1; Cse_sc002261.1_g060.1; Cse_sc008114.1_g040.1; Cse_sc010067.1_g010.1; Cse_sc010655.1_g030.1; Cse_sc013253.1_g040.1; Cse_sc015964.1_g020.1
GO:0006906	vesicle fusion	biological_process	13	6179	63	55481	0.008473266	0.032274483	1.852801476	Cse_sc001313.1_g010.1; Cse_sc001470.1_g080.1; Cse_sc003085.1_g020.1; Cse_sc004732.1_g040.1; Cse_sc007682.1_g010.1; Cse_sc008373.1_g020.1; Cse_sc017989.1_g030.1; Cse_sc021456.1_g020.1; Cse_sc022651.1_g020.1; Cse_sc027497.1_g070.1; Cse_sc031645.1_g020.1; Cse_sc034253.1_g010.1; Cse_sc038641.1_g010.1
GO:0000302	response to reactive oxygen species	biological_process	20	6179	109	55481	0.00856829	0.032605287	1.647515779	Cse_sc000033.1_g080.1; Cse_sc000487.1_g090.1; Cse_sc000726.1_g020.1; Cse_sc000802.1_g030.1; Cse_sc003214.1_g050.1; Cse_sc003932.1_g010.1; Cse_sc006097.1_g050.1; Cse_sc006446.1_g050.1; Cse_sc007597.1_g040.1; Cse_sc007649.1_g040.1; Cse_sc012042.1_g010.1; Cse_sc012354.1_g040.1; Cse_sc012888.1_g020.1; Cse_sc018604.1_g010.1; Cse_sc020239.1_g010.1; Cse_sc020573.1_g030.1; Cse_sc029844.1_g020.1; Cse_sc03…
GO:0006662	glycerol ether metabolic process	biological_process	9	6179	39	55481	0.008850705	0.033647865	2.072067922	Cse_sc000391.1_g010.1; Cse_sc002359.1_g020.1; Cse_sc004548.1_g050.1; Cse_sc007602.1_g030.1; Cse_sc009917.1_g040.1; Cse_sc012875.1_g020.1; Cse_sc017122.1_g030.1; Cse_sc032458.1_g010.1; Cse_sc042259.1_g010.1
GO:0048278	vesicle docking	biological_process	10	6179	45	55481	0.009026952	0.034285225	1.995324666	Cse_sc001313.1_g010.1; Cse_sc001470.1_g080.1; Cse_sc003085.1_g020.1; Cse_sc007682.1_g010.1; Cse_sc008373.1_g020.1; Cse_sc017989.1_g030.1; Cse_sc022651.1_g020.1; Cse_sc031645.1_g020.1; Cse_sc034253.1_g010.1; Cse_sc038641.1_g010.1
GO:0010026	trichome differentiation	biological_process	7	6179	28	55481	0.00942352	0.035757371	2.244740249	Cse_sc000028.1_g020.1; Cse_sc000321.1_g030.1; Cse_sc003313.1_g050.1; Cse_sc005158.1_g020.1; Cse_sc011710.1_g010.1; Cse_sc033280.1_g010.1; Cse_sc048418.1_g010.1
GO:0032482	Rab protein signal transduction	biological_process	13	6179	64	55481	0.009759503	0.036881769	1.823851453	Cse_sc000015.1_g050.1; Cse_sc000044.1_g170.1; Cse_sc000655.1_g030.1; Cse_sc000930.1_g100.1; Cse_sc004469.1_g060.1; Cse_sc004473.1_g070.1; Cse_sc005295.1_g080.1; Cse_sc008356.1_g040.1; Cse_sc016695.1_g020.1; Cse_sc020713.1_g020.1; Cse_sc028787.1_g040.1; Cse_sc036041.1_g020.1; Cse_sc045626.1_g020.1
GO:0030246	carbohydrate binding	molecular_function	43	6179	277	55481	0.010119124	0.036881769	1.393845931	Cse_sc000031.1_g110.1; Cse_sc000284.1_g100.1; Cse_sc000689.1_g080.1; Cse_sc001152.1_g070.1; Cse_sc001220.1_g050.1; Cse_sc001238.1_g050.1; Cse_sc001390.1_g040.1; Cse_sc001578.1_g080.1; Cse_sc001642.1_g030.1; Cse_sc001873.1_g110.1; Cse_sc001923.1_g040.1; Cse_sc002209.1_g050.1; Cse_sc002369.1_g030.1; Cse_sc002679.1_g010.1; Cse_sc003463.1_g030.1; Cse_sc004684.1_g020.1; Cse_sc005813.1_g040.1; Cse_sc00…
GO:0004674	protein serine/threonine kinase activity	molecular_function	161	6179	1219	55481	0.010136832	0.036881769	1.185900509	Cse_sc000050.1_g230.1; Cse_sc000067.1_g030.1; Cse_sc000082.1_g020.1; Cse_sc000131.1_g130.1; Cse_sc000155.1_g010.1; Cse_sc000298.1_g080.1; Cse_sc000305.1_g090.1; Cse_sc000429.1_g040.1; Cse_sc000560.1_g070.1; Cse_sc000608.1_g040.1; Cse_sc000615.1_g030.1; Cse_sc000630.1_g100.1; Cse_sc000648.1_g050.1; Cse_sc000657.1_g060.1; Cse_sc000659.1_g060.1; Cse_sc000661.1_g060.1; Cse_sc000724.1_g020.1; Cse_sc00…
GO:0004042	acetyl-CoA:L-glutamate N-acetyltransferase activity	molecular_function	4	6179	13	55481	0.010195839	0.036881769	2.76275723	Cse_sc000155.1_g030.1; Cse_sc000543.1_g030.1; Cse_sc010695.1_g030.1; Cse_sc012305.1_g050.1
GO:0103045	methione N-acyltransferase activity	molecular_function	4	6179	13	55481	0.010195839	0.036881769	2.76275723	Cse_sc000155.1_g030.1; Cse_sc000543.1_g030.1; Cse_sc010695.1_g030.1; Cse_sc012305.1_g050.1
GO:0015185	gamma-aminobutyric acid transmembrane transporter activity	molecular_function	4	6179	13	55481	0.010195839	0.036881769	2.76275723	Cse_sc001457.1_g010.1; Cse_sc005789.1_g050.1; Cse_sc007079.1_g020.1; Cse_sc007079.1_g050.1
GO:0015812	gamma-aminobutyric acid transport	biological_process	4	6179	13	55481	0.010195839	0.036881769	2.76275723	Cse_sc001457.1_g010.1; Cse_sc005789.1_g050.1; Cse_sc007079.1_g020.1; Cse_sc007079.1_g050.1
GO:0019139	cytokinin dehydrogenase activity	molecular_function	4	6179	13	55481	0.010195839	0.036881769	2.76275723	Cse_sc002022.1_g030.1; Cse_sc008490.1_g060.1; Cse_sc010248.1_g020.1; Cse_sc011286.1_g010.1
GO:0045335	phagocytic vesicle	cellular_component	4	6179	13	55481	0.010195839	0.036881769	2.76275723	Cse_sc002120.1_g040.1; Cse_sc007495.1_g020.1; Cse_sc010888.1_g010.1; Cse_sc031196.1_g030.1
GO:0010227	floral organ abscission	biological_process	4	6179	13	55481	0.010195839	0.036881769	2.76275723	Cse_sc003974.1_g010.1; Cse_sc004468.1_g030.1; Cse_sc006691.1_g020.1; Cse_sc027006.1_g010.1
GO:0102311	8-hydroxygeraniol dehydrogenase activity	molecular_function	4	6179	13	55481	0.010195839	0.036881769	2.76275723	Cse_sc006116.1_g040.1; Cse_sc045163.1_g010.1; Cse_sc055900.1_g010.1; Cse_sc056588.1_g010.1
GO:0080046	quercetin 4'-O-glucosyltransferase activity	molecular_function	4	6179	13	55481	0.010195839	0.036881769	2.76275723	Cse_sc006385.1_g020.1; Cse_sc007770.1_g020.1; Cse_sc013365.1_g030.1; Cse_sc060878.1_g010.1
GO:0031683	G-protein beta/gamma-subunit complex binding	molecular_function	4	6179	13	55481	0.010195839	0.036881769	2.76275723	Cse_sc015008.1_g030.1; Cse_sc028587.1_g020.1; Cse_sc030580.1_g020.1; Cse_sc050371.1_g010.1
GO:0005765	lysosomal membrane	cellular_component	8	6179	34	55481	0.010269752	0.036881769	2.112696705	Cse_sc000959.1_g020.1; Cse_sc001609.1_g020.1; Cse_sc002644.1_g080.1; Cse_sc004365.1_g110.1; Cse_sc016407.1_g010.1; Cse_sc030541.1_g030.1; Cse_sc031322.1_g010.1; Cse_sc074774.1_g010.1
GO:0055088	lipid homeostasis	biological_process	6	6179	23	55481	0.010333211	0.036881769	2.342337651	Cse_sc001233.1_g060.1; Cse_sc007302.1_g020.1; Cse_sc007448.1_g030.1; Cse_sc009590.1_g070.1; Cse_sc017985.1_g040.1; Cse_sc022883.1_g030.1
GO:0004467	long-chain fatty acid-CoA ligase activity	molecular_function	6	6179	23	55481	0.010333211	0.036881769	2.342337651	Cse_sc001367.1_g030.1; Cse_sc001642.1_g080.1; Cse_sc003085.1_g050.1; Cse_sc015652.1_g020.1; Cse_sc026132.1_g020.1; Cse_sc066749.1_g010.1
GO:0005484	SNAP receptor activity	molecular_function	16	6179	84	55481	0.010471431	0.036881769	1.710278285	Cse_sc001313.1_g010.1; Cse_sc001470.1_g080.1; Cse_sc003085.1_g020.1; Cse_sc004732.1_g040.1; Cse_sc007682.1_g010.1; Cse_sc008373.1_g020.1; Cse_sc014654.1_g030.1; Cse_sc017989.1_g030.1; Cse_sc021456.1_g020.1; Cse_sc021945.1_g030.1; Cse_sc022651.1_g020.1; Cse_sc027497.1_g070.1; Cse_sc028513.1_g010.1; Cse_sc031645.1_g020.1; Cse_sc034253.1_g010.1; Cse_sc038641.1_g010.1
GO:0048268	clathrin coat assembly	biological_process	11	6179	52	55481	0.010517704	0.036881769	1.899395596	Cse_sc000302.1_g030.1; Cse_sc001615.1_g080.1; Cse_sc002518.1_g030.1; Cse_sc008534.1_g030.1; Cse_sc009045.1_g020.1; Cse_sc015342.1_g020.1; Cse_sc020143.1_g020.1; Cse_sc026782.1_g020.1; Cse_sc034221.1_g020.1; Cse_sc046981.1_g020.1; Cse_sc050968.1_g020.1
GO:0005992	trehalose biosynthetic process	biological_process	11	6179	52	55481	0.010517704	0.036881769	1.899395596	Cse_sc001756.1_g050.1; Cse_sc003364.1_g070.1; Cse_sc005458.1_g020.1; Cse_sc005804.1_g020.1; Cse_sc008610.1_g020.1; Cse_sc011713.1_g070.1; Cse_sc024569.1_g010.1; Cse_sc025358.1_g020.1; Cse_sc025621.1_g020.1; Cse_sc031605.1_g030.1; Cse_sc087701.1_g010.1
GO:0016604	nuclear body	cellular_component	9	6179	40	55481	0.010647998	0.036881769	2.020266224	Cse_sc000264.1_g050.1; Cse_sc004241.1_g050.1; Cse_sc004583.1_g010.1; Cse_sc004980.1_g010.1; Cse_sc008036.1_g030.1; Cse_sc009767.1_g040.1; Cse_sc011651.1_g020.1; Cse_sc012486.1_g010.1; Cse_sc014505.1_g010.1
GO:0000160	phosphorelay signal transduction system	biological_process	9	6179	40	55481	0.010647998	0.036881769	2.020266224	Cse_sc000291.1_g090.1; Cse_sc003802.1_g060.1; Cse_sc007648.1_g070.1; Cse_sc010602.1_g020.1; Cse_sc010865.1_g040.1; Cse_sc018154.1_g030.1; Cse_sc021704.1_g010.1; Cse_sc025294.1_g010.1; Cse_sc035866.1_g010.1
GO:0002239	response to oomycetes	biological_process	9	6179	40	55481	0.010647998	0.036881769	2.020266224	Cse_sc000380.1_g130.1; Cse_sc002203.1_g020.1; Cse_sc005236.1_g020.1; Cse_sc007262.1_g020.1; Cse_sc010001.1_g020.1; Cse_sc014961.1_g020.1; Cse_sc015211.1_g010.1; Cse_sc024041.1_g010.1; Cse_sc028645.1_g010.1
GO:0071732	cellular response to nitric oxide	biological_process	9	6179	40	55481	0.010647998	0.036881769	2.020266224	Cse_sc006615.1_g020.1; Cse_sc006852.1_g010.1; Cse_sc014477.1_g010.1; Cse_sc018079.1_g020.1; Cse_sc019552.1_g020.1; Cse_sc020936.1_g020.1; Cse_sc021232.1_g010.1; Cse_sc031115.1_g020.1; Cse_sc034806.1_g010.1
GO:0030659	cytoplasmic vesicle membrane	cellular_component	10	6179	46	55481	0.010696243	0.036881769	1.951948043	Cse_sc000660.1_g020.1; Cse_sc004029.1_g010.1; Cse_sc004563.1_g030.1; Cse_sc006535.1_g080.1; Cse_sc007244.1_g070.1; Cse_sc008356.1_g040.1; Cse_sc013321.1_g010.1; Cse_sc014832.1_g010.1; Cse_sc020940.1_g030.1; Cse_sc023807.1_g030.1
GO:0007010	cytoskeleton organization	biological_process	5	6179	18	55481	0.010789562	0.036881769	2.494155832	Cse_sc000088.1_g130.1; Cse_sc000409.1_g010.1; Cse_sc001212.1_g030.1; Cse_sc025809.1_g030.1; Cse_sc038821.1_g010.1
GO:0010107	potassium ion import	biological_process	5	6179	18	55481	0.010789562	0.036881769	2.494155832	Cse_sc000197.1_g060.1; Cse_sc001138.1_g030.1; Cse_sc002036.1_g010.1; Cse_sc004057.1_g010.1; Cse_sc007981.1_g070.1
GO:0102970	7-deoxyloganetic acid glucosyltransferase activity	molecular_function	5	6179	18	55481	0.010789562	0.036881769	2.494155832	Cse_sc000863.1_g110.1; Cse_sc006700.1_g040.1; Cse_sc006700.1_g050.1; Cse_sc009355.1_g030.1; Cse_sc033735.1_g010.1
GO:0008356	asymmetric cell division	biological_process	5	6179	18	55481	0.010789562	0.036881769	2.494155832	Cse_sc003530.1_g020.1; Cse_sc011605.1_g010.1; Cse_sc013324.1_g040.1; Cse_sc033219.1_g010.1; Cse_sc055763.1_g010.1
GO:0005227	calcium activated cation channel activity	molecular_function	5	6179	18	55481	0.010789562	0.036881769	2.494155832	Cse_sc003662.1_g030.1; Cse_sc008106.1_g010.1; Cse_sc008307.1_g040.1; Cse_sc016173.1_g020.1; Cse_sc026216.1_g020.1
GO:0010274	hydrotropism	biological_process	5	6179	18	55481	0.010789562	0.036881769	2.494155832	Cse_sc005022.1_g040.1; Cse_sc005992.1_g050.1; Cse_sc037670.1_g010.1; Cse_sc052629.1_g010.1; Cse_sc053814.1_g010.1
GO:0010077	maintenance of inflorescence meristem identity	biological_process	5	6179	18	55481	0.010789562	0.036881769	2.494155832	Cse_sc005536.1_g070.1; Cse_sc010635.1_g010.1; Cse_sc015774.1_g010.1; Cse_sc017768.1_g020.1; Cse_sc030932.1_g010.1
GO:0009765	photosynthesis, light harvesting	biological_process	5	6179	18	55481	0.010789562	0.036881769	2.494155832	Cse_sc005807.1_g020.1; Cse_sc019544.1_g020.1; Cse_sc022081.1_g010.1; Cse_sc022176.1_g030.1; Cse_sc022707.1_g030.1
GO:0006629	lipid metabolic process	biological_process	27	6179	161	55481	0.011375419	0.036881769	1.50578849	Cse_sc000643.1_g020.1; Cse_sc001534.1_g040.1; Cse_sc002288.1_g040.1; Cse_sc003313.1_g050.1; Cse_sc004427.1_g070.1; Cse_sc004717.1_g050.1; Cse_sc006615.1_g020.1; Cse_sc006738.1_g020.1; Cse_sc006852.1_g030.1; Cse_sc007076.1_g020.1; Cse_sc008234.1_g020.1; Cse_sc008975.1_g020.1; Cse_sc010067.1_g010.1; Cse_sc011710.1_g010.1; Cse_sc012379.1_g010.1; Cse_sc012628.1_g030.1; Cse_sc013293.1_g020.1; Cse_sc01…
GO:0019760	glucosinolate metabolic process	biological_process	19	6179	105	55481	0.01146249	0.036881769	1.624764371	Cse_sc003101.1_g030.1; Cse_sc003546.1_g070.1; Cse_sc003732.1_g060.1; Cse_sc007125.1_g030.1; Cse_sc008350.1_g010.1; Cse_sc009571.1_g010.1; Cse_sc020202.1_g020.1; Cse_sc020247.1_g010.1; Cse_sc021904.1_g030.1; Cse_sc021919.1_g020.1; Cse_sc021999.1_g020.1; Cse_sc022158.1_g010.1; Cse_sc025566.1_g020.1; Cse_sc025928.1_g010.1; Cse_sc027511.1_g030.1; Cse_sc028174.1_g010.1; Cse_sc031969.1_g020.1; Cse_sc03…
GO:0000799	nuclear condensin complex	cellular_component	2	6179	5	55481	0.011605023	0.036881769	3.591584399	Cse_sc000134.1_g080.1; Cse_sc027573.1_g020.1
GO:0033481	galacturonate biosynthetic process	biological_process	2	6179	5	55481	0.011605023	0.036881769	3.591584399	Cse_sc000183.1_g080.1; Cse_sc000358.1_g080.1
GO:0003999	adenine phosphoribosyltransferase activity	molecular_function	2	6179	5	55481	0.011605023	0.036881769	3.591584399	Cse_sc000272.1_g010.1; Cse_sc004264.1_g020.1
GO:0006168	adenine salvage	biological_process	2	6179	5	55481	0.011605023	0.036881769	3.591584399	Cse_sc000272.1_g010.1; Cse_sc004264.1_g020.1
GO:0042131	thiamine phosphate phosphatase activity	molecular_function	2	6179	5	55481	0.011605023	0.036881769	3.591584399	Cse_sc000498.1_g020.1; Cse_sc052788.1_g010.1
GO:0010024	phytochromobilin biosynthetic process	biological_process	2	6179	5	55481	0.011605023	0.036881769	3.591584399	Cse_sc000681.1_g060.1; Cse_sc028235.1_g010.1
GO:0070507	regulation of microtubule cytoskeleton organization	biological_process	2	6179	5	55481	0.011605023	0.036881769	3.591584399	Cse_sc000989.1_g040.1; Cse_sc018106.1_g010.1
GO:0006884	cell volume homeostasis	biological_process	2	6179	5	55481	0.011605023	0.036881769	3.591584399	Cse_sc001138.1_g030.1; Cse_sc007981.1_g070.1
GO:0046345	abscisic acid catabolic process	biological_process	2	6179	5	55481	0.011605023	0.036881769	3.591584399	Cse_sc001326.1_g060.1; Cse_sc009551.1_g010.1
GO:0016906	sterol 3-beta-glucosyltransferase activity	molecular_function	2	6179	5	55481	0.011605023	0.036881769	3.591584399	Cse_sc001347.1_g020.1; Cse_sc003952.1_g040.1
GO:0030259	lipid glycosylation	biological_process	2	6179	5	55481	0.011605023	0.036881769	3.591584399	Cse_sc001347.1_g020.1; Cse_sc003952.1_g040.1
GO:0102202	soladodine glucosyltransferase activity	molecular_function	2	6179	5	55481	0.011605023	0.036881769	3.591584399	Cse_sc001347.1_g020.1; Cse_sc003952.1_g040.1
GO:0102203	brassicasterol glucosyltransferase activity	molecular_function	2	6179	5	55481	0.011605023	0.036881769	3.591584399	Cse_sc001347.1_g020.1; Cse_sc003952.1_g040.1
GO:0102205	cholesterol allpha-glucosyltransferase activity	molecular_function	2	6179	5	55481	0.011605023	0.036881769	3.591584399	Cse_sc001347.1_g020.1; Cse_sc003952.1_g040.1
GO:0008934	inositol monophosphate 1-phosphatase activity	molecular_function	2	6179	5	55481	0.011605023	0.036881769	3.591584399	Cse_sc001351.1_g030.1; Cse_sc032042.1_g010.1
GO:0052832	inositol monophosphate 3-phosphatase activity	molecular_function	2	6179	5	55481	0.011605023	0.036881769	3.591584399	Cse_sc001351.1_g030.1; Cse_sc032042.1_g010.1
GO:0052833	inositol monophosphate 4-phosphatase activity	molecular_function	2	6179	5	55481	0.011605023	0.036881769	3.591584399	Cse_sc001351.1_g030.1; Cse_sc032042.1_g010.1
GO:0052852	very-long-chain-(S)-2-hydroxy-acid oxidase activity	molecular_function	2	6179	5	55481	0.011605023	0.036881769	3.591584399	Cse_sc001388.1_g060.1; Cse_sc029402.1_g010.1
GO:0052853	long-chain-(S)-2-hydroxy-long-chain-acid oxidase activity	molecular_function	2	6179	5	55481	0.011605023	0.036881769	3.591584399	Cse_sc001388.1_g060.1; Cse_sc029402.1_g010.1
GO:0052854	medium-chain-(S)-2-hydroxy-acid oxidase activity	molecular_function	2	6179	5	55481	0.011605023	0.036881769	3.591584399	Cse_sc001388.1_g060.1; Cse_sc029402.1_g010.1
GO:0000254	C-4 methylsterol oxidase activity	molecular_function	2	6179	5	55481	0.011605023	0.036881769	3.591584399	Cse_sc001721.1_g050.1; Cse_sc003187.1_g030.1
GO:0090697	post-embryonic plant organ morphogenesis	biological_process	2	6179	5	55481	0.011605023	0.036881769	3.591584399	Cse_sc001794.1_g030.1; Cse_sc007648.1_g030.1
GO:2000469	negative regulation of peroxidase activity	biological_process	2	6179	5	55481	0.011605023	0.036881769	3.591584399	Cse_sc001794.1_g030.1; Cse_sc007648.1_g030.1
GO:0003959	NADPH dehydrogenase activity	molecular_function	2	6179	5	55481	0.011605023	0.036881769	3.591584399	Cse_sc001873.1_g050.1; Cse_sc003912.1_g050.1
GO:0042214	terpene metabolic process	biological_process	2	6179	5	55481	0.011605023	0.036881769	3.591584399	Cse_sc002909.1_g010.1; Cse_sc041927.1_g010.1
GO:0052579	(+)-pulegone reductase, (+)-isomenthone as substrate, activity	molecular_function	2	6179	5	55481	0.011605023	0.036881769	3.591584399	Cse_sc002909.1_g010.1; Cse_sc041927.1_g010.1
GO:0052580	(+)-pulegone reductase, (-)-menthone as substrate, activity	molecular_function	2	6179	5	55481	0.011605023	0.036881769	3.591584399	Cse_sc002909.1_g010.1; Cse_sc041927.1_g010.1
GO:0045703	ketoreductase activity	molecular_function	2	6179	5	55481	0.011605023	0.036881769	3.591584399	Cse_sc003566.1_g010.1; Cse_sc047023.1_g010.1
GO:0042349	guiding stereospecific synthesis activity	molecular_function	2	6179	5	55481	0.011605023	0.036881769	3.591584399	Cse_sc003571.1_g070.1; Cse_sc006030.1_g060.1
GO:1901599	(-)-pinoresinol biosynthetic process	biological_process	2	6179	5	55481	0.011605023	0.036881769	3.591584399	Cse_sc003571.1_g070.1; Cse_sc006030.1_g060.1
GO:0009725	response to hormone	biological_process	2	6179	5	55481	0.011605023	0.036881769	3.591584399	Cse_sc003594.1_g030.1; Cse_sc037140.1_g020.1
GO:0006066	alcohol metabolic process	biological_process	2	6179	5	55481	0.011605023	0.036881769	3.591584399	Cse_sc003621.1_g050.1; Cse_sc004244.1_g060.1
GO:0045550	geranylgeranyl reductase activity	molecular_function	2	6179	5	55481	0.011605023	0.036881769	3.591584399	Cse_sc004138.1_g060.1; Cse_sc027671.1_g010.1
GO:0102067	geranylgeranyl diphosphate reductase activity	molecular_function	2	6179	5	55481	0.011605023	0.036881769	3.591584399	Cse_sc004138.1_g060.1; Cse_sc027671.1_g010.1
GO:0006499	N-terminal protein myristoylation	biological_process	2	6179	5	55481	0.011605023	0.036881769	3.591584399	Cse_sc005287.1_g030.1; Cse_sc030456.1_g030.1
GO:0035865	cellular response to potassium ion	biological_process	2	6179	5	55481	0.011605023	0.036881769	3.591584399	Cse_sc005287.1_g030.1; Cse_sc030456.1_g030.1
GO:0051920	peroxiredoxin activity	molecular_function	2	6179	5	55481	0.011605023	0.036881769	3.591584399	Cse_sc005822.1_g090.1; Cse_sc026347.1_g010.1
GO:1905589	positive regulation of L-arginine import across plasma membrane	biological_process	2	6179	5	55481	0.011605023	0.036881769	3.591584399	Cse_sc005838.1_g010.1; Cse_sc013884.1_g050.1
GO:1905736	negative regulation of L-proline import across plasma membrane	biological_process	2	6179	5	55481	0.011605023	0.036881769	3.591584399	Cse_sc005838.1_g010.1; Cse_sc013884.1_g050.1
GO:0008928	mannose-1-phosphate guanylyltransferase (GDP) activity	molecular_function	2	6179	5	55481	0.011605023	0.036881769	3.591584399	Cse_sc006385.1_g020.1; Cse_sc007770.1_g020.1
GO:0010471	GDP-galactose:mannose-1-phosphate guanylyltransferase activity	molecular_function	2	6179	5	55481	0.011605023	0.036881769	3.591584399	Cse_sc006385.1_g020.1; Cse_sc007770.1_g020.1
GO:0010472	GDP-galactose:glucose-1-phosphate guanylyltransferase activity	molecular_function	2	6179	5	55481	0.011605023	0.036881769	3.591584399	Cse_sc006385.1_g020.1; Cse_sc007770.1_g020.1
GO:0010473	GDP-galactose:myoinositol-1-phosphate guanylyltransferase activity	molecular_function	2	6179	5	55481	0.011605023	0.036881769	3.591584399	Cse_sc006385.1_g020.1; Cse_sc007770.1_g020.1
GO:0010474	glucose-1-phosphate guanylyltransferase (GDP) activity	molecular_function	2	6179	5	55481	0.011605023	0.036881769	3.591584399	Cse_sc006385.1_g020.1; Cse_sc007770.1_g020.1
GO:0045333	cellular respiration	biological_process	2	6179	5	55481	0.011605023	0.036881769	3.591584399	Cse_sc006766.1_g090.1; Cse_sc024165.1_g020.1
GO:0097295	morphine biosynthetic process	biological_process	2	6179	5	55481	0.011605023	0.036881769	3.591584399	Cse_sc007070.1_g030.1; Cse_sc027494.1_g020.1
GO:0048462	carpel formation	biological_process	2	6179	5	55481	0.011605023	0.036881769	3.591584399	Cse_sc007362.1_g050.1; Cse_sc026072.1_g030.1
GO:0070382	exocytic vesicle	cellular_component	2	6179	5	55481	0.011605023	0.036881769	3.591584399	Cse_sc008356.1_g040.1; Cse_sc008692.1_g010.1
GO:0004591	oxoglutarate dehydrogenase (succinyl-transferring) activity	molecular_function	2	6179	5	55481	0.011605023	0.036881769	3.591584399	Cse_sc008424.1_g020.1; Cse_sc026710.1_g010.1
GO:0009353	mitochondrial oxoglutarate dehydrogenase complex	cellular_component	2	6179	5	55481	0.011605023	0.036881769	3.591584399	Cse_sc008424.1_g020.1; Cse_sc026710.1_g010.1
GO:0019567	arabinose biosynthetic process	biological_process	2	6179	5	55481	0.011605023	0.036881769	3.591584399	Cse_sc009298.1_g040.1; Cse_sc033847.1_g020.1
GO:0017172	cysteine dioxygenase activity	molecular_function	2	6179	5	55481	0.011605023	0.036881769	3.591584399	Cse_sc010252.1_g020.1; Cse_sc017200.1_g020.1
GO:0047911	galacturan 1,4-alpha-galacturonidase activity	molecular_function	2	6179	5	55481	0.011605023	0.036881769	3.591584399	Cse_sc010280.1_g050.1; Cse_sc030442.1_g010.1
GO:2000121	regulation of removal of superoxide radicals	biological_process	2	6179	5	55481	0.011605023	0.036881769	3.591584399	Cse_sc010808.1_g030.1; Cse_sc010916.1_g020.1
GO:0005697	telomerase holoenzyme complex	cellular_component	2	6179	5	55481	0.011605023	0.036881769	3.591584399	Cse_sc012076.1_g020.1; Cse_sc012234.1_g010.1
GO:0043487	regulation of RNA stability	biological_process	2	6179	5	55481	0.011605023	0.036881769	3.591584399	Cse_sc012076.1_g020.1; Cse_sc012234.1_g010.1
GO:0010469	regulation of signaling receptor activity	biological_process	2	6179	5	55481	0.011605023	0.036881769	3.591584399	Cse_sc012499.1_g020.1; Cse_sc025628.1_g030.1
GO:0048018	receptor ligand activity	molecular_function	2	6179	5	55481	0.011605023	0.036881769	3.591584399	Cse_sc012499.1_g020.1; Cse_sc025628.1_g030.1
GO:0050291	sphingosine N-acyltransferase activity	molecular_function	2	6179	5	55481	0.011605023	0.036881769	3.591584399	Cse_sc012827.1_g010.1; Cse_sc198888.1_g010.1
GO:0006793	phosphorus metabolic process	biological_process	2	6179	5	55481	0.011605023	0.036881769	3.591584399	Cse_sc015080.1_g020.1; Cse_sc023754.1_g010.1
GO:0001673	male germ cell nucleus	cellular_component	2	6179	5	55481	0.011605023	0.036881769	3.591584399	Cse_sc015635.1_g020.1; Cse_sc027335.1_g030.1
GO:0008444	CDP-diacylglycerol-glycerol-3-phosphate 3-phosphatidyltransferase activity	molecular_function	2	6179	5	55481	0.011605023	0.036881769	3.591584399	Cse_sc020742.1_g010.1; Cse_sc049507.1_g020.1
GO:0008290	F-actin capping protein complex	cellular_component	2	6179	5	55481	0.011605023	0.036881769	3.591584399	Cse_sc023762.1_g010.1; Cse_sc032529.1_g010.1
GO:0000038	very long-chain fatty acid metabolic process	biological_process	2	6179	5	55481	0.011605023	0.036881769	3.591584399	Cse_sc024568.1_g020.1; Cse_sc034964.1_g020.1
GO:0010438	cellular response to sulfur starvation	biological_process	2	6179	5	55481	0.011605023	0.036881769	3.591584399	Cse_sc041741.1_g020.1; Cse_sc048676.1_g010.1
GO:0098869	cellular oxidant detoxification	biological_process	2	6179	5	55481	0.011605023	0.036881769	3.591584399	Cse_sc041741.1_g020.1; Cse_sc048676.1_g010.1
GO:0009507	chloroplast	cellular_component	428	6179	3478	55481	0.011741686	0.036881769	1.104944021	Cse_sc000008.1_g180.1; Cse_sc000030.1_g060.1; Cse_sc000031.1_g090.1; Cse_sc000037.1_g120.1; Cse_sc000081.1_g030.1; Cse_sc000083.1_g050.1; Cse_sc000092.1_g120.1; Cse_sc000141.1_g040.1; Cse_sc000149.1_g050.1; Cse_sc000149.1_g070.1; Cse_sc000155.1_g030.1; Cse_sc000204.1_g060.1; Cse_sc000274.1_g150.1; Cse_sc000289.1_g060.1; Cse_sc000302.1_g030.1; Cse_sc000311.1_g040.1; Cse_sc000315.1_g040.1; Cse_sc00…
GO:0010329	auxin efflux transmembrane transporter activity	molecular_function	12	6179	59	55481	0.011765975	0.036881769	1.826229355	Cse_sc000331.1_g010.1; Cse_sc000944.1_g030.1; Cse_sc001128.1_g030.1; Cse_sc001217.1_g070.1; Cse_sc001373.1_g090.1; Cse_sc003943.1_g020.1; Cse_sc004089.1_g020.1; Cse_sc005662.1_g040.1; Cse_sc011622.1_g030.1; Cse_sc021131.1_g020.1; Cse_sc022493.1_g020.1; Cse_sc028245.1_g020.1
GO:0015079	potassium ion transmembrane transporter activity	molecular_function	7	6179	29	55481	0.01176798	0.036881769	2.167335413	Cse_sc002068.1_g030.1; Cse_sc008149.1_g020.1; Cse_sc008422.1_g020.1; Cse_sc016830.1_g020.1; Cse_sc029942.1_g010.1; Cse_sc033183.1_g020.1; Cse_sc040028.1_g010.1
GO:0015112	nitrate transmembrane transporter activity	molecular_function	7	6179	29	55481	0.01176798	0.036881769	2.167335413	Cse_sc002156.1_g140.1; Cse_sc002327.1_g070.1; Cse_sc004009.1_g050.1; Cse_sc004841.1_g030.1; Cse_sc019056.1_g020.1; Cse_sc029550.1_g020.1; Cse_sc037579.1_g010.1
GO:1901348	positive regulation of secondary cell wall biogenesis	biological_process	3	6179	9	55481	0.012199182	0.036881769	2.992986999	Cse_sc000151.1_g040.1; Cse_sc004343.1_g040.1; Cse_sc006858.1_g050.1
GO:0010371	regulation of gibberellin biosynthetic process	biological_process	3	6179	9	55481	0.012199182	0.036881769	2.992986999	Cse_sc000223.1_g120.1; Cse_sc001783.1_g060.1; Cse_sc004468.1_g030.1
GO:0043693	monoterpene biosynthetic process	biological_process	3	6179	9	55481	0.012199182	0.036881769	2.992986999	Cse_sc000274.1_g150.1; Cse_sc019041.1_g010.1; Cse_sc022849.1_g020.1
GO:0004813	alanine-tRNA ligase activity	molecular_function	3	6179	9	55481	0.012199182	0.036881769	2.992986999	Cse_sc000684.1_g040.1; Cse_sc007725.1_g050.1; Cse_sc064206.1_g010.1
GO:0006419	alanyl-tRNA aminoacylation	biological_process	3	6179	9	55481	0.012199182	0.036881769	2.992986999	Cse_sc000684.1_g040.1; Cse_sc007725.1_g050.1; Cse_sc064206.1_g010.1
GO:0000913	preprophase band assembly	biological_process	3	6179	9	55481	0.012199182	0.036881769	2.992986999	Cse_sc000700.1_g110.1; Cse_sc006014.1_g030.1; Cse_sc027801.1_g020.1
GO:0043812	phosphatidylinositol-4-phosphate phosphatase activity	molecular_function	3	6179	9	55481	0.012199182	0.036881769	2.992986999	Cse_sc000763.1_g120.1; Cse_sc004563.1_g030.1; Cse_sc007244.1_g070.1
GO:0006598	polyamine catabolic process	biological_process	3	6179	9	55481	0.012199182	0.036881769	2.992986999	Cse_sc000944.1_g040.1; Cse_sc001494.1_g030.1; Cse_sc035192.1_g040.1
GO:0003852	2-isopropylmalate synthase activity	molecular_function	3	6179	9	55481	0.012199182	0.036881769	2.992986999	Cse_sc001677.1_g030.1; Cse_sc005743.1_g020.1; Cse_sc023912.1_g010.1
GO:0010322	regulation of isopentenyl diphosphate biosynthetic process, methylerythritol 4-phosphate pathway	biological_process	3	6179	9	55481	0.012199182	0.036881769	2.992986999	Cse_sc001772.1_g110.1; Cse_sc012708.1_g020.1; Cse_sc013626.1_g040.1
GO:0052622	ATP dimethylallyltransferase activity	molecular_function	3	6179	9	55481	0.012199182	0.036881769	2.992986999	Cse_sc002277.1_g010.1; Cse_sc009755.1_g010.1; Cse_sc023349.1_g010.1
GO:0052623	ADP dimethylallyltransferase activity	molecular_function	3	6179	9	55481	0.012199182	0.036881769	2.992986999	Cse_sc002277.1_g010.1; Cse_sc009755.1_g010.1; Cse_sc023349.1_g010.1
GO:0003955	NAD(P)H dehydrogenase (quinone) activity	molecular_function	3	6179	9	55481	0.012199182	0.036881769	2.992986999	Cse_sc002294.1_g050.1; Cse_sc021065.1_g030.1; Cse_sc026507.1_g020.1
GO:0004049	anthranilate synthase activity	molecular_function	3	6179	9	55481	0.012199182	0.036881769	2.992986999	Cse_sc002748.1_g090.1; Cse_sc003720.1_g030.1; Cse_sc024154.1_g010.1
GO:0004556	alpha-amylase activity	molecular_function	3	6179	9	55481	0.012199182	0.036881769	2.992986999	Cse_sc003597.1_g100.1; Cse_sc011250.1_g040.1; Cse_sc013250.1_g020.1
GO:0103025	alpha-amylase activity (releasing maltohexaose)	molecular_function	3	6179	9	55481	0.012199182	0.036881769	2.992986999	Cse_sc003597.1_g100.1; Cse_sc011250.1_g040.1; Cse_sc013250.1_g020.1
GO:0010444	guard mother cell differentiation	biological_process	3	6179	9	55481	0.012199182	0.036881769	2.992986999	Cse_sc004509.1_g020.1; Cse_sc009189.1_g040.1; Cse_sc014813.1_g020.1
GO:0032940	secretion by cell	biological_process	3	6179	9	55481	0.012199182	0.036881769	2.992986999	Cse_sc005021.1_g050.1; Cse_sc017449.1_g010.1; Cse_sc021329.1_g010.1
GO:0048826	cotyledon morphogenesis	biological_process	3	6179	9	55481	0.012199182	0.036881769	2.992986999	Cse_sc007028.1_g010.1; Cse_sc018144.1_g020.1; Cse_sc030208.1_g010.1
GO:0010542	nitrate efflux transmembrane transporter activity	molecular_function	3	6179	9	55481	0.012199182	0.036881769	2.992986999	Cse_sc010893.1_g030.1; Cse_sc020437.1_g010.1; Cse_sc021019.1_g010.1
GO:0001872	(1->3)-beta-D-glucan binding	molecular_function	3	6179	9	55481	0.012199182	0.036881769	2.992986999	Cse_sc011927.1_g010.1; Cse_sc019032.1_g040.1; Cse_sc025287.1_g010.1
GO:0032432	actin filament bundle	cellular_component	3	6179	9	55481	0.012199182	0.036881769	2.992986999	Cse_sc012462.1_g030.1; Cse_sc014682.1_g030.1; Cse_sc027349.1_g020.1
GO:0005179	hormone activity	molecular_function	3	6179	9	55481	0.012199182	0.036881769	2.992986999	Cse_sc012499.1_g020.1; Cse_sc015327.1_g050.1; Cse_sc025628.1_g030.1
GO:0004072	aspartate kinase activity	molecular_function	3	6179	9	55481	0.012199182	0.036881769	2.992986999	Cse_sc015030.1_g010.1; Cse_sc032334.1_g010.1; Cse_sc045278.1_g010.1
GO:0006354	DNA-templated transcription, elongation	biological_process	3	6179	9	55481	0.012199182	0.036881769	2.992986999	Cse_sc019341.1_g010.1; Cse_sc019341.1_g020.1; Cse_sc031162.1_g010.1
GO:0048527	lateral root development	biological_process	11	6179	53	55481	0.012250727	0.036881769	1.863557943	Cse_sc000082.1_g120.1; Cse_sc000906.1_g030.1; Cse_sc001794.1_g030.1; Cse_sc005117.1_g040.1; Cse_sc006039.1_g010.1; Cse_sc007537.1_g030.1; Cse_sc007648.1_g030.1; Cse_sc018182.1_g020.1; Cse_sc022493.1_g020.1; Cse_sc037587.1_g020.1; Cse_sc140478.1_g010.1
GO:0005351	carbohydrate:proton symporter activity	molecular_function	11	6179	53	55481	0.012250727	0.036881769	1.863557943	Cse_sc000406.1_g030.1; Cse_sc000619.1_g020.1; Cse_sc002322.1_g070.1; Cse_sc009532.1_g020.1; Cse_sc014651.1_g010.1; Cse_sc014651.1_g020.1; Cse_sc014651.1_g030.1; Cse_sc015304.1_g050.1; Cse_sc018201.1_g020.1; Cse_sc029906.1_g020.1; Cse_sc045184.1_g020.1
GO:0005355	glucose transmembrane transporter activity	molecular_function	11	6179	53	55481	0.012250727	0.036881769	1.863557943	Cse_sc000406.1_g030.1; Cse_sc000619.1_g020.1; Cse_sc002322.1_g070.1; Cse_sc009532.1_g020.1; Cse_sc014651.1_g010.1; Cse_sc014651.1_g020.1; Cse_sc014651.1_g030.1; Cse_sc015304.1_g050.1; Cse_sc018201.1_g020.1; Cse_sc029906.1_g020.1; Cse_sc045184.1_g020.1
GO:0008645	hexose transmembrane transport	biological_process	11	6179	53	55481	0.012250727	0.036881769	1.863557943	Cse_sc000406.1_g030.1; Cse_sc000619.1_g020.1; Cse_sc002322.1_g070.1; Cse_sc009532.1_g020.1; Cse_sc014651.1_g010.1; Cse_sc014651.1_g020.1; Cse_sc014651.1_g030.1; Cse_sc015304.1_g050.1; Cse_sc018201.1_g020.1; Cse_sc029906.1_g020.1; Cse_sc045184.1_g020.1
GO:0019310	inositol catabolic process	biological_process	1	6179	2	55481	0.012401818	0.036881769	4.489480498	Cse_sc000005.1_g160.1
GO:0050113	inositol oxygenase activity	molecular_function	1	6179	2	55481	0.012401818	0.036881769	4.489480498	Cse_sc000005.1_g160.1
GO:0050355	triphosphatase activity	molecular_function	1	6179	2	55481	0.012401818	0.036881769	4.489480498	Cse_sc000134.1_g070.1
GO:0000779	condensed chromosome, centromeric region	cellular_component	1	6179	2	55481	0.012401818	0.036881769	4.489480498	Cse_sc000134.1_g080.1
GO:0004338	glucan exo-1,3-beta-glucosidase activity	molecular_function	1	6179	2	55481	0.012401818	0.036881769	4.489480498	Cse_sc000197.1_g070.1
GO:0006073	cellular glucan metabolic process	biological_process	1	6179	2	55481	0.012401818	0.036881769	4.489480498	Cse_sc000197.1_g070.1
GO:0009557	antipodal cell differentiation	biological_process	1	6179	2	55481	0.012401818	0.036881769	4.489480498	Cse_sc000291.1_g090.1
GO:0102455	anthocyanidin 3-O-glucoside 2''-O-glucosyltransferase activity	molecular_function	1	6179	2	55481	0.012401818	0.036881769	4.489480498	Cse_sc000578.1_g060.1
GO:0009270	response to humidity	biological_process	1	6179	2	55481	0.012401818	0.036881769	4.489480498	Cse_sc000586.1_g080.1
GO:0006808	regulation of nitrogen utilization	biological_process	1	6179	2	55481	0.012401818	0.036881769	4.489480498	Cse_sc000641.1_g030.1
GO:0033206	meiotic cytokinesis	biological_process	1	6179	2	55481	0.012401818	0.036881769	4.489480498	Cse_sc000641.1_g030.1
GO:1900033	negative regulation of trichome patterning	biological_process	1	6179	2	55481	0.012401818	0.036881769	4.489480498	Cse_sc000641.1_g030.1
GO:1905614	negative regulation of developmental vegetative growth	biological_process	1	6179	2	55481	0.012401818	0.036881769	4.489480498	Cse_sc000641.1_g030.1
GO:1905622	negative regulation of leaf development	biological_process	1	6179	2	55481	0.012401818	0.036881769	4.489480498	Cse_sc000641.1_g030.1
GO:1990019	protein storage vacuole organization	biological_process	1	6179	2	55481	0.012401818	0.036881769	4.489480498	Cse_sc000732.1_g040.1
GO:2001246	negative regulation of phosphatidylcholine biosynthetic process	biological_process	1	6179	2	55481	0.012401818	0.036881769	4.489480498	Cse_sc000878.1_g020.1
GO:0048315	conidium formation	biological_process	1	6179	2	55481	0.012401818	0.036881769	4.489480498	Cse_sc000944.1_g040.1
GO:0003844	1,4-alpha-glucan branching enzyme activity	molecular_function	1	6179	2	55481	0.012401818	0.036881769	4.489480498	Cse_sc001083.1_g050.1
GO:0102752	1,4-alpha-glucan branching enzyme activity (using a glucosylated glycogenin as primer for glycogen synthesis)	molecular_function	1	6179	2	55481	0.012401818	0.036881769	4.489480498	Cse_sc001083.1_g050.1
GO:1903298	negative regulation of hypoxia-induced intrinsic apoptotic signaling pathway	biological_process	1	6179	2	55481	0.012401818	0.036881769	4.489480498	Cse_sc001239.1_g050.1
GO:0005254	chloride channel activity	molecular_function	1	6179	2	55481	0.012401818	0.036881769	4.489480498	Cse_sc001254.1_g040.1
GO:0031407	oxylipin metabolic process	biological_process	1	6179	2	55481	0.012401818	0.036881769	4.489480498	Cse_sc001274.1_g050.1
GO:0004401	histidinol-phosphatase activity	molecular_function	1	6179	2	55481	0.012401818	0.036881769	4.489480498	Cse_sc001351.1_g030.1
GO:0052834	inositol monophosphate phosphatase activity	molecular_function	1	6179	2	55481	0.012401818	0.036881769	4.489480498	Cse_sc001351.1_g030.1
GO:0043529	GET complex	cellular_component	1	6179	2	55481	0.012401818	0.036881769	4.489480498	Cse_sc001352.1_g030.1
GO:0071816	tail-anchored membrane protein insertion into ER membrane	biological_process	1	6179	2	55481	0.012401818	0.036881769	4.489480498	Cse_sc001352.1_g030.1
GO:0042493	response to drug	biological_process	1	6179	2	55481	0.012401818	0.036881769	4.489480498	Cse_sc001388.1_g070.1
GO:0015940	pantothenate biosynthetic process	biological_process	1	6179	2	55481	0.012401818	0.036881769	4.489480498	Cse_sc001621.1_g070.1
GO:0080064	4,4-dimethyl-9beta,19-cyclopropylsterol oxidation	biological_process	1	6179	2	55481	0.012401818	0.036881769	4.489480498	Cse_sc001721.1_g050.1
GO:0004753	saccharopine dehydrogenase activity	molecular_function	1	6179	2	55481	0.012401818	0.036881769	4.489480498	Cse_sc001888.1_g060.1
GO:0019878	lysine biosynthetic process via aminoadipic acid	biological_process	1	6179	2	55481	0.012401818	0.036881769	4.489480498	Cse_sc001888.1_g060.1
GO:0047130	saccharopine dehydrogenase (NADP+, L-lysine-forming) activity	molecular_function	1	6179	2	55481	0.012401818	0.036881769	4.489480498	Cse_sc001888.1_g060.1
GO:0047131	saccharopine dehydrogenase (NAD+, L-glutamate-forming) activity	molecular_function	1	6179	2	55481	0.012401818	0.036881769	4.489480498	Cse_sc001888.1_g060.1
GO:0004421	hydroxymethylglutaryl-CoA synthase activity	molecular_function	1	6179	2	55481	0.012401818	0.036881769	4.489480498	Cse_sc002368.1_g010.1
GO:0006084	acetyl-CoA metabolic process	biological_process	1	6179	2	55481	0.012401818	0.036881769	4.489480498	Cse_sc002368.1_g010.1
GO:0009268	response to pH	biological_process	1	6179	2	55481	0.012401818	0.036881769	4.489480498	Cse_sc002494.1_g050.1
GO:0051641	cellular localization	biological_process	1	6179	2	55481	0.012401818	0.036881769	4.489480498	Cse_sc002781.1_g020.1
GO:0045153	electron transporter, transferring electrons within CoQH2-cytochrome c reductase complex activity	molecular_function	1	6179	2	55481	0.012401818	0.036881769	4.489480498	Cse_sc002796.1_g040.1
GO:0050638	taxadien-5-alpha-ol O-acetyltransferase activity	molecular_function	1	6179	2	55481	0.012401818	0.036881769	4.489480498	Cse_sc002946.1_g060.1
GO:0019365	pyridine nucleotide salvage	biological_process	1	6179	2	55481	0.012401818	0.036881769	4.489480498	Cse_sc002955.1_g050.1
GO:0006480	N-terminal protein amino acid methylation	biological_process	1	6179	2	55481	0.012401818	0.036881769	4.489480498	Cse_sc003083.1_g060.1
GO:0051562	negative regulation of mitochondrial calcium ion concentration	biological_process	1	6179	2	55481	0.012401818	0.036881769	4.489480498	Cse_sc003265.1_g010.1
GO:0000980	RNA polymerase II distal enhancer sequence-specific DNA binding	molecular_function	1	6179	2	55481	0.012401818	0.036881769	4.489480498	Cse_sc003573.1_g030.1
GO:0001103	RNA polymerase II repressing transcription factor binding	molecular_function	1	6179	2	55481	0.012401818	0.036881769	4.489480498	Cse_sc003573.1_g030.1
GO:0003856	3-dehydroquinate synthase activity	molecular_function	1	6179	2	55481	0.012401818	0.036881769	4.489480498	Cse_sc004160.1_g050.1
GO:0033587	shikimate biosynthetic process	biological_process	1	6179	2	55481	0.012401818	0.036881769	4.489480498	Cse_sc004160.1_g050.1
GO:0005674	transcription factor TFIIF complex	cellular_component	1	6179	2	55481	0.012401818	0.036881769	4.489480498	Cse_sc004299.1_g040.1
GO:0010647	positive regulation of cell communication	biological_process	1	6179	2	55481	0.012401818	0.036881769	4.489480498	Cse_sc004548.1_g050.1
GO:0031567	mitotic cell size control checkpoint	biological_process	1	6179	2	55481	0.012401818	0.036881769	4.489480498	Cse_sc004655.1_g050.1
GO:0097468	programmed cell death in response to reactive oxygen species	biological_process	1	6179	2	55481	0.012401818	0.036881769	4.489480498	Cse_sc004756.1_g030.1
GO:1990570	GDP-mannose transmembrane transport	biological_process	1	6179	2	55481	0.012401818	0.036881769	4.489480498	Cse_sc004816.1_g040.1
GO:0044550	secondary metabolite biosynthetic process	biological_process	1	6179	2	55481	0.012401818	0.036881769	4.489480498	Cse_sc005063.1_g030.1
GO:0016776	phosphotransferase activity, phosphate group as acceptor	molecular_function	1	6179	2	55481	0.012401818	0.036881769	4.489480498	Cse_sc005067.1_g030.1
GO:0004781	sulfate adenylyltransferase (ATP) activity	molecular_function	1	6179	2	55481	0.012401818	0.036881769	4.489480498	Cse_sc005123.1_g020.1
GO:1903086	negative regulation of sinapate ester biosynthetic process	biological_process	1	6179	2	55481	0.012401818	0.036881769	4.489480498	Cse_sc005135.1_g010.1
GO:0033186	CAF-1 complex	cellular_component	1	6179	2	55481	0.012401818	0.036881769	4.489480498	Cse_sc005158.1_g020.1
GO:0035250	UDP-galactosyltransferase activity	molecular_function	1	6179	2	55481	0.012401818	0.036881769	4.489480498	Cse_sc005545.1_g040.1
GO:0052654	L-leucine transaminase activity	molecular_function	1	6179	2	55481	0.012401818	0.036881769	4.489480498	Cse_sc005778.1_g030.1
GO:0052655	L-valine transaminase activity	molecular_function	1	6179	2	55481	0.012401818	0.036881769	4.489480498	Cse_sc005778.1_g030.1
GO:0052656	L-isoleucine transaminase activity	molecular_function	1	6179	2	55481	0.012401818	0.036881769	4.489480498	Cse_sc005778.1_g030.1
GO:0080097	L-tryptophan:pyruvate aminotransferase activity	molecular_function	1	6179	2	55481	0.012401818	0.036881769	4.489480498	Cse_sc006039.1_g010.1
GO:0009528	plastid inner membrane	cellular_component	1	6179	2	55481	0.012401818	0.036881769	4.489480498	Cse_sc006206.1_g050.1
GO:0000947	amino acid catabolic process to alcohol via Ehrlich pathway	biological_process	1	6179	2	55481	0.012401818	0.036881769	4.489480498	Cse_sc006323.1_g040.1
GO:0033833	hydroxymethylfurfural reductase (NADH) activity	molecular_function	1	6179	2	55481	0.012401818	0.036881769	4.489480498	Cse_sc006323.1_g040.1
GO:0033859	furaldehyde metabolic process	biological_process	1	6179	2	55481	0.012401818	0.036881769	4.489480498	Cse_sc006323.1_g040.1
GO:0004581	dolichyl-phosphate beta-glucosyltransferase activity	molecular_function	1	6179	2	55481	0.012401818	0.036881769	4.489480498	Cse_sc006451.1_g010.1
GO:0004357	glutamate-cysteine ligase activity	molecular_function	1	6179	2	55481	0.012401818	0.036881769	4.489480498	Cse_sc006604.1_g050.1
GO:0006750	glutathione biosynthetic process	biological_process	1	6179	2	55481	0.012401818	0.036881769	4.489480498	Cse_sc006604.1_g050.1
GO:0019146	arabinose-5-phosphate isomerase activity	molecular_function	1	6179	2	55481	0.012401818	0.036881769	4.489480498	Cse_sc006841.1_g030.1
GO:0001097	TFIIH-class transcription factor complex binding	molecular_function	1	6179	2	55481	0.012401818	0.036881769	4.489480498	Cse_sc006887.1_g040.1
GO:0005673	transcription factor TFIIE complex	cellular_component	1	6179	2	55481	0.012401818	0.036881769	4.489480498	Cse_sc006887.1_g040.1
GO:0008824	cyanate hydratase activity	molecular_function	1	6179	2	55481	0.012401818	0.036881769	4.489480498	Cse_sc006924.1_g020.1
GO:0009439	cyanate metabolic process	biological_process	1	6179	2	55481	0.012401818	0.036881769	4.489480498	Cse_sc006924.1_g020.1
GO:0015690	aluminum cation transport	biological_process	1	6179	2	55481	0.012401818	0.036881769	4.489480498	Cse_sc007262.1_g020.1
GO:0008511	sodium:potassium:chloride symporter activity	molecular_function	1	6179	2	55481	0.012401818	0.036881769	4.489480498	Cse_sc007981.1_g070.1
GO:0006540	glutamate decarboxylation to succinate	biological_process	1	6179	2	55481	0.012401818	0.036881769	4.489480498	Cse_sc007991.1_g040.1
GO:0001158	enhancer sequence-specific DNA binding	molecular_function	1	6179	2	55481	0.012401818	0.036881769	4.489480498	Cse_sc008114.1_g040.1
GO:0004496	mevalonate kinase activity	molecular_function	1	6179	2	55481	0.012401818	0.036881769	4.489480498	Cse_sc009063.1_g020.1
GO:0016212	kynurenine-oxoglutarate transaminase activity	molecular_function	1	6179	2	55481	0.012401818	0.036881769	4.489480498	Cse_sc009513.1_g070.1
GO:0034276	kynurenic acid biosynthetic process	biological_process	1	6179	2	55481	0.012401818	0.036881769	4.489480498	Cse_sc009513.1_g070.1
GO:0047536	2-aminoadipate transaminase activity	molecular_function	1	6179	2	55481	0.012401818	0.036881769	4.489480498	Cse_sc009513.1_g070.1
GO:0030644	cellular chloride ion homeostasis	biological_process	1	6179	2	55481	0.012401818	0.036881769	4.489480498	Cse_sc010067.1_g010.1
GO:0009973	adenylyl-sulfate reductase activity	molecular_function	1	6179	2	55481	0.012401818	0.036881769	4.489480498	Cse_sc010309.1_g020.1
GO:0019419	sulfate reduction	biological_process	1	6179	2	55481	0.012401818	0.036881769	4.489480498	Cse_sc010309.1_g020.1
GO:0033741	adenylyl-sulfate reductase (glutathione) activity	molecular_function	1	6179	2	55481	0.012401818	0.036881769	4.489480498	Cse_sc010309.1_g020.1
GO:0047251	thiohydroximate beta-D-glucosyltransferase activity	molecular_function	1	6179	2	55481	0.012401818	0.036881769	4.489480498	Cse_sc010548.1_g010.1
GO:0102659	UDP-glucose: 4-methylthiobutylhydroximate S-glucosyltransferase activity	molecular_function	1	6179	2	55481	0.012401818	0.036881769	4.489480498	Cse_sc010548.1_g010.1
GO:0103099	UDP-glucose:5-methylthiopentylhydroximate S-glucosyltransferase activity	molecular_function	1	6179	2	55481	0.012401818	0.036881769	4.489480498	Cse_sc010548.1_g010.1
GO:0103100	UDP-glucose: 6-methylthiohexylhydroximate S-glucosyltransferase activity	molecular_function	1	6179	2	55481	0.012401818	0.036881769	4.489480498	Cse_sc010548.1_g010.1
GO:0103101	UDP-glucose:7-methylthioheptylhydroximate S-glucosyltransferase activity	molecular_function	1	6179	2	55481	0.012401818	0.036881769	4.489480498	Cse_sc010548.1_g010.1
GO:0103102	UDP-glucose:8-methylthiooctylhydroximate S-glucosyltransferase activity	molecular_function	1	6179	2	55481	0.012401818	0.036881769	4.489480498	Cse_sc010548.1_g010.1
GO:0103103	UDP-glucose: 9-methylthiononylhydroximate S-glucosyltransferase activity	molecular_function	1	6179	2	55481	0.012401818	0.036881769	4.489480498	Cse_sc010548.1_g010.1
GO:0030639	polyketide biosynthetic process	biological_process	1	6179	2	55481	0.012401818	0.036881769	4.489480498	Cse_sc010629.1_g030.1
GO:0090439	tetraketide alpha-pyrone synthase activity	molecular_function	1	6179	2	55481	0.012401818	0.036881769	4.489480498	Cse_sc010629.1_g030.1
GO:0080006	internode patterning	biological_process	1	6179	2	55481	0.012401818	0.036881769	4.489480498	Cse_sc010635.1_g010.1
GO:0016872	intramolecular lyase activity	molecular_function	1	6179	2	55481	0.012401818	0.036881769	4.489480498	Cse_sc011032.1_g030.1
GO:0010151	chloroplast elongation	biological_process	1	6179	2	55481	0.012401818	0.036881769	4.489480498	Cse_sc011262.1_g020.1
GO:0043610	regulation of carbohydrate utilization	biological_process	1	6179	2	55481	0.012401818	0.036881769	4.489480498	Cse_sc011262.1_g020.1
GO:0080050	regulation of seed development	biological_process	1	6179	2	55481	0.012401818	0.036881769	4.489480498	Cse_sc011262.1_g020.1
GO:0004730	pseudouridylate synthase activity	molecular_function	1	6179	2	55481	0.012401818	0.036881769	4.489480498	Cse_sc011390.1_g020.1
GO:0009856	pollination	biological_process	1	6179	2	55481	0.012401818	0.036881769	4.489480498	Cse_sc011846.1_g020.1
GO:0010094	specification of carpel identity	biological_process	1	6179	2	55481	0.012401818	0.036881769	4.489480498	Cse_sc011999.1_g020.1
GO:0015800	acidic amino acid transport	biological_process	1	6179	2	55481	0.012401818	0.036881769	4.489480498	Cse_sc012323.1_g020.1
GO:0052545	callose localization	biological_process	1	6179	2	55481	0.012401818	0.036881769	4.489480498	Cse_sc013080.1_g050.1
GO:0003838	sterol 24-C-methyltransferase activity	molecular_function	1	6179	2	55481	0.012401818	0.036881769	4.489480498	Cse_sc013205.1_g020.1
GO:0048244	phytanoyl-CoA dioxygenase activity	molecular_function	1	6179	2	55481	0.012401818	0.036881769	4.489480498	Cse_sc014539.1_g030.1
GO:0050422	strictosidine beta-glucosidase activity	molecular_function	1	6179	2	55481	0.012401818	0.036881769	4.489480498	Cse_sc014644.1_g010.1
GO:0031436	BRCA1-BARD1 complex	cellular_component	1	6179	2	55481	0.012401818	0.036881769	4.489480498	Cse_sc015133.1_g020.1
GO:0045717	negative regulation of fatty acid biosynthetic process	biological_process	1	6179	2	55481	0.012401818	0.036881769	4.489480498	Cse_sc015133.1_g020.1
GO:0070531	BRCA1-A complex	cellular_component	1	6179	2	55481	0.012401818	0.036881769	4.489480498	Cse_sc015133.1_g020.1
GO:0010083	regulation of vegetative meristem growth	biological_process	1	6179	2	55481	0.012401818	0.036881769	4.489480498	Cse_sc015414.1_g020.1
GO:0010599	production of lsiRNA involved in RNA interference	biological_process	1	6179	2	55481	0.012401818	0.036881769	4.489480498	Cse_sc015767.1_g010.1
GO:0046510	UDP-sulfoquinovose:DAG sulfoquinovosyltransferase activity	molecular_function	1	6179	2	55481	0.012401818	0.036881769	4.489480498	Cse_sc016068.1_g010.1
GO:0071287	cellular response to manganese ion	biological_process	1	6179	2	55481	0.012401818	0.036881769	4.489480498	Cse_sc016149.1_g010.1
GO:0036094	small molecule binding	molecular_function	1	6179	2	55481	0.012401818	0.036881769	4.489480498	Cse_sc016174.1_g020.1
GO:0046322	negative regulation of fatty acid oxidation	biological_process	1	6179	2	55481	0.012401818	0.036881769	4.489480498	Cse_sc016174.1_g020.1
GO:0006740	NADPH regeneration	biological_process	1	6179	2	55481	0.012401818	0.036881769	4.489480498	Cse_sc016609.1_g020.1
GO:0015276	ligand-gated ion channel activity	molecular_function	1	6179	2	55481	0.012401818	0.036881769	4.489480498	Cse_sc017247.1_g050.1
GO:0071260	cellular response to mechanical stimulus	biological_process	1	6179	2	55481	0.012401818	0.036881769	4.489480498	Cse_sc017247.1_g050.1
GO:0071311	cellular response to acetate	biological_process	1	6179	2	55481	0.012401818	0.036881769	4.489480498	Cse_sc017247.1_g050.1
GO:0006799	polyphosphate biosynthetic process	biological_process	1	6179	2	55481	0.012401818	0.036881769	4.489480498	Cse_sc017778.1_g010.1
GO:0048016	inositol phosphate-mediated signaling	biological_process	1	6179	2	55481	0.012401818	0.036881769	4.489480498	Cse_sc017778.1_g010.1
GO:0008841	dihydrofolate synthase activity	molecular_function	1	6179	2	55481	0.012401818	0.036881769	4.489480498	Cse_sc018213.1_g050.1
GO:0046452	dihydrofolate metabolic process	biological_process	1	6179	2	55481	0.012401818	0.036881769	4.489480498	Cse_sc018409.1_g020.1
GO:0004067	asparaginase activity	molecular_function	1	6179	2	55481	0.012401818	0.036881769	4.489480498	Cse_sc019105.1_g030.1
GO:0033345	asparagine catabolic process via L-aspartate	biological_process	1	6179	2	55481	0.012401818	0.036881769	4.489480498	Cse_sc019105.1_g030.1
GO:1903293	phosphatase complex	cellular_component	1	6179	2	55481	0.012401818	0.036881769	4.489480498	Cse_sc019696.1_g010.1
GO:0102240	soyasapogenol B glucuronide galactosyltransferase activity	molecular_function	1	6179	2	55481	0.012401818	0.036881769	4.489480498	Cse_sc020422.1_g010.1
GO:0090071	negative regulation of ribosome biogenesis	biological_process	1	6179	2	55481	0.012401818	0.036881769	4.489480498	Cse_sc020444.1_g010.1
GO:0048451	petal formation	biological_process	1	6179	2	55481	0.012401818	0.036881769	4.489480498	Cse_sc020467.1_g020.1
GO:2000009	negative regulation of protein localization to cell surface	biological_process	1	6179	2	55481	0.012401818	0.036881769	4.489480498	Cse_sc020758.1_g030.1
GO:0046183	L-idonate catabolic process	biological_process	1	6179	2	55481	0.012401818	0.036881769	4.489480498	Cse_sc022630.1_g020.1
GO:0102198	L-idonate 5-dehydrogenase activity (NAD-dependent)	molecular_function	1	6179	2	55481	0.012401818	0.036881769	4.489480498	Cse_sc022630.1_g020.1
GO:0034484	raffinose catabolic process	biological_process	1	6179	2	55481	0.012401818	0.036881769	4.489480498	Cse_sc023011.1_g010.1
GO:0016807	cysteine-type carboxypeptidase activity	molecular_function	1	6179	2	55481	0.012401818	0.036881769	4.489480498	Cse_sc024317.1_g010.1
GO:0044403	symbiont process	biological_process	1	6179	2	55481	0.012401818	0.036881769	4.489480498	Cse_sc024470.1_g010.1
GO:0008428	ribonuclease inhibitor activity	molecular_function	1	6179	2	55481	0.012401818	0.036881769	4.489480498	Cse_sc024559.1_g030.1
GO:0047443	4-hydroxy-4-methyl-2-oxoglutarate aldolase activity	molecular_function	1	6179	2	55481	0.012401818	0.036881769	4.489480498	Cse_sc024559.1_g030.1
GO:0051252	regulation of RNA metabolic process	biological_process	1	6179	2	55481	0.012401818	0.036881769	4.489480498	Cse_sc024559.1_g030.1
GO:0042814	monopolar cell growth	biological_process	1	6179	2	55481	0.012401818	0.036881769	4.489480498	Cse_sc025826.1_g020.1
GO:0036292	DNA rewinding	biological_process	1	6179	2	55481	0.012401818	0.036881769	4.489480498	Cse_sc025881.1_g010.1
GO:0071497	cellular response to freezing	biological_process	1	6179	2	55481	0.012401818	0.036881769	4.489480498	Cse_sc025928.1_g010.1
GO:0052873	FMN reductase (NADPH) activity	molecular_function	1	6179	2	55481	0.012401818	0.036881769	4.489480498	Cse_sc026507.1_g020.1
GO:0044547	DNA topoisomerase binding	molecular_function	1	6179	2	55481	0.012401818	0.036881769	4.489480498	Cse_sc027573.1_g020.1
GO:0072587	DNA topoisomerase (ATP-hydrolyzing) activator activity	molecular_function	1	6179	2	55481	0.012401818	0.036881769	4.489480498	Cse_sc027573.1_g020.1
GO:0006857	oligopeptide transport	biological_process	1	6179	2	55481	0.012401818	0.036881769	4.489480498	Cse_sc029550.1_g020.1
GO:0035335	peptidyl-tyrosine dephosphorylation	biological_process	1	6179	2	55481	0.012401818	0.036881769	4.489480498	Cse_sc030387.1_g020.1
GO:0090421	embryonic meristem initiation	biological_process	1	6179	2	55481	0.012401818	0.036881769	4.489480498	Cse_sc031255.1_g010.1
GO:0010347	L-galactose-1-phosphate phosphatase activity	molecular_function	1	6179	2	55481	0.012401818	0.036881769	4.489480498	Cse_sc032042.1_g010.1
GO:0031848	protection from non-homologous end joining at telomere	biological_process	1	6179	2	55481	0.012401818	0.036881769	4.489480498	Cse_sc034172.1_g010.1
GO:0035312	5'-3' exodeoxyribonuclease activity	molecular_function	1	6179	2	55481	0.012401818	0.036881769	4.489480498	Cse_sc034172.1_g010.1
GO:1990482	sphingolipid alpha-glucuronosyltransferase activity	molecular_function	1	6179	2	55481	0.012401818	0.036881769	4.489480498	Cse_sc034588.1_g030.1
GO:0008481	sphinganine kinase activity	molecular_function	1	6179	2	55481	0.012401818	0.036881769	4.489480498	Cse_sc038036.1_g010.1
GO:0102251	all-trans-beta-apo-10'-carotenal cleavage oxygenase activity	molecular_function	1	6179	2	55481	0.012401818	0.036881769	4.489480498	Cse_sc040897.1_g010.1
GO:0102396	9-cis-10'-apo-beta-carotenal cleavage oxygenase activity	molecular_function	1	6179	2	55481	0.012401818	0.036881769	4.489480498	Cse_sc040897.1_g010.1
GO:0034979	NAD-dependent protein deacetylase activity	molecular_function	1	6179	2	55481	0.012401818	0.036881769	4.489480498	Cse_sc055281.1_g010.1
GO:0052662	zeaxanthin epoxidase activity	molecular_function	1	6179	2	55481	0.012401818	0.036881769	4.489480498	Cse_sc081552.1_g010.1
GO:0009089	lysine biosynthetic process via diaminopimelate	biological_process	8	6179	35	55481	0.01248785	0.037082313	2.052333942	Cse_sc005648.1_g050.1; Cse_sc013249.1_g010.1; Cse_sc015030.1_g010.1; Cse_sc028477.1_g010.1; Cse_sc032334.1_g010.1; Cse_sc039320.1_g010.1; Cse_sc045278.1_g010.1; Cse_sc052739.1_g010.1
GO:0015267	channel activity	molecular_function	8	6179	35	55481	0.01248785	0.037082313	2.052333942	Cse_sc008220.1_g020.1; Cse_sc009202.1_g030.1; Cse_sc013286.1_g030.1; Cse_sc015655.1_g010.1; Cse_sc018808.1_g010.1; Cse_sc018980.1_g010.1; Cse_sc035871.1_g010.1; Cse_sc040717.1_g010.1
GO:0006612	protein targeting to membrane	biological_process	10	6179	47	55481	0.012591897	0.037335678	1.910417233	Cse_sc000146.1_g080.1; Cse_sc000726.1_g010.1; Cse_sc001573.1_g070.1; Cse_sc008373.1_g020.1; Cse_sc014832.1_g010.1; Cse_sc014832.1_g020.1; Cse_sc014894.1_g030.1; Cse_sc022651.1_g020.1; Cse_sc023807.1_g030.1; Cse_sc038641.1_g010.1
GO:0055046	microgametogenesis	biological_process	10	6179	47	55481	0.012591897	0.037335678	1.910417233	Cse_sc000266.1_g030.1; Cse_sc001458.1_g030.1; Cse_sc001907.1_g030.1; Cse_sc002875.1_g050.1; Cse_sc003199.1_g030.1; Cse_sc004053.1_g050.1; Cse_sc005073.1_g030.1; Cse_sc005264.1_g020.1; Cse_sc008522.1_g040.1; Cse_sc013080.1_g050.1
GO:0010039	response to iron ion	biological_process	9	6179	41	55481	0.012709037	0.037655008	1.970991438	Cse_sc005102.1_g020.1; Cse_sc006446.1_g050.1; Cse_sc019393.1_g030.1; Cse_sc020936.1_g020.1; Cse_sc021232.1_g010.1; Cse_sc029995.1_g010.1; Cse_sc039828.1_g010.1; Cse_sc065279.1_g020.1; Cse_sc095205.1_g010.1
GO:0006559	L-phenylalanine catabolic process	biological_process	6	6179	24	55481	0.013212209	0.039000953	2.244740249	Cse_sc000012.1_g140.1; Cse_sc002207.1_g080.1; Cse_sc003492.1_g050.1; Cse_sc015783.1_g040.1; Cse_sc020225.1_g010.1; Cse_sc027823.1_g010.1
GO:0004040	amidase activity	molecular_function	6	6179	24	55481	0.013212209	0.039000953	2.244740249	Cse_sc000050.1_g150.1; Cse_sc000188.1_g090.1; Cse_sc004790.1_g070.1; Cse_sc017737.1_g010.1; Cse_sc018446.1_g010.1; Cse_sc018446.1_g020.1
GO:0080019	fatty-acyl-CoA reductase (alcohol-forming) activity	molecular_function	6	6179	24	55481	0.013212209	0.039000953	2.244740249	Cse_sc000643.1_g020.1; Cse_sc004427.1_g070.1; Cse_sc026041.1_g020.1; Cse_sc031942.1_g010.1; Cse_sc031942.1_g020.1; Cse_sc063846.1_g010.1
GO:0102965	alcohol-forming fatty acyl-CoA reductase activity	molecular_function	6	6179	24	55481	0.013212209	0.039000953	2.244740249	Cse_sc000643.1_g020.1; Cse_sc004427.1_g070.1; Cse_sc026041.1_g020.1; Cse_sc031942.1_g010.1; Cse_sc031942.1_g020.1; Cse_sc063846.1_g010.1
GO:0035435	phosphate ion transmembrane transport	biological_process	6	6179	24	55481	0.013212209	0.039000953	2.244740249	Cse_sc008692.1_g020.1; Cse_sc011212.1_g040.1; Cse_sc013491.1_g030.1; Cse_sc023914.1_g010.1; Cse_sc034527.1_g020.1; Cse_sc041820.1_g020.1
GO:0016301	kinase activity	molecular_function	31	6179	192	55481	0.013261617	0.039117847	1.449728078	Cse_sc000409.1_g070.1; Cse_sc000429.1_g040.1; Cse_sc000792.1_g040.1; Cse_sc001345.1_g010.1; Cse_sc001664.1_g060.1; Cse_sc002288.1_g040.1; Cse_sc003585.1_g060.1; Cse_sc003901.1_g050.1; Cse_sc004241.1_g050.1; Cse_sc004818.1_g060.1; Cse_sc005839.1_g040.1; Cse_sc006025.1_g010.1; Cse_sc006912.1_g020.1; Cse_sc008036.1_g030.1; Cse_sc008667.1_g010.1; Cse_sc008784.1_g020.1; Cse_sc008792.1_g010.1; Cse_sc00…
GO:0009941	chloroplast envelope	cellular_component	96	6179	698	55481	0.013386522	0.039457095	1.234928733	Cse_sc000031.1_g090.1; Cse_sc000092.1_g080.1; Cse_sc000141.1_g040.1; Cse_sc000149.1_g050.1; Cse_sc000149.1_g070.1; Cse_sc000161.1_g030.1; Cse_sc000215.1_g010.1; Cse_sc000234.1_g010.1; Cse_sc000391.1_g010.1; Cse_sc000403.1_g010.1; Cse_sc000477.1_g130.1; Cse_sc000487.1_g090.1; Cse_sc000531.1_g180.1; Cse_sc000663.1_g110.1; Cse_sc000860.1_g020.1; Cse_sc001094.1_g010.1; Cse_sc001345.1_g010.1; Cse_sc00…
GO:0009958	positive gravitropism	biological_process	11	6179	54	55481	0.014194318	0.041776341	1.82904761	Cse_sc000001.1_g050.1; Cse_sc001217.1_g070.1; Cse_sc002593.1_g050.1; Cse_sc003585.1_g060.1; Cse_sc005662.1_g040.1; Cse_sc006039.1_g010.1; Cse_sc011622.1_g030.1; Cse_sc013645.1_g020.1; Cse_sc022493.1_g020.1; Cse_sc022675.1_g020.1; Cse_sc049440.1_g010.1
GO:0005811	lipid droplet	cellular_component	11	6179	54	55481	0.014194318	0.041776341	1.82904761	Cse_sc001218.1_g020.1; Cse_sc002590.1_g010.1; Cse_sc003623.1_g070.1; Cse_sc004614.1_g010.1; Cse_sc004614.1_g040.1; Cse_sc008044.1_g030.1; Cse_sc012134.1_g030.1; Cse_sc023172.1_g020.1; Cse_sc024250.1_g030.1; Cse_sc024422.1_g030.1; Cse_sc028721.1_g020.1
GO:0051304	chromosome separation	biological_process	5	6179	19	55481	0.01430908	0.041897659	2.362884473	Cse_sc000134.1_g080.1; Cse_sc001060.1_g030.1; Cse_sc012911.1_g020.1; Cse_sc014001.1_g020.1; Cse_sc026658.1_g010.1
GO:0015386	potassium:proton antiporter activity	molecular_function	5	6179	19	55481	0.01430908	0.041897659	2.362884473	Cse_sc000197.1_g060.1; Cse_sc002036.1_g010.1; Cse_sc006708.1_g030.1; Cse_sc010539.1_g050.1; Cse_sc019056.1_g020.1
GO:0010052	guard cell differentiation	biological_process	5	6179	19	55481	0.01430908	0.041897659	2.362884473	Cse_sc000499.1_g080.1; Cse_sc001758.1_g060.1; Cse_sc009501.1_g010.1; Cse_sc030485.1_g010.1; Cse_sc033266.1_g030.1
GO:0010374	stomatal complex development	biological_process	5	6179	19	55481	0.01430908	0.041897659	2.362884473	Cse_sc000499.1_g080.1; Cse_sc001758.1_g060.1; Cse_sc009501.1_g010.1; Cse_sc033266.1_g030.1; Cse_sc046455.1_g010.1
GO:0045899	positive regulation of RNA polymerase II transcriptional preinitiation complex assembly	biological_process	5	6179	19	55481	0.01430908	0.041897659	2.362884473	Cse_sc000978.1_g050.1; Cse_sc003183.1_g010.1; Cse_sc005799.1_g080.1; Cse_sc007663.1_g040.1; Cse_sc009439.1_g040.1
GO:0008239	dipeptidyl-peptidase activity	molecular_function	5	6179	19	55481	0.01430908	0.041897659	2.362884473	Cse_sc001952.1_g010.1; Cse_sc002103.1_g050.1; Cse_sc002103.1_g060.1; Cse_sc006634.1_g010.1; Cse_sc047029.1_g020.1
GO:0042732	D-xylose metabolic process	biological_process	5	6179	19	55481	0.01430908	0.041897659	2.362884473	Cse_sc004040.1_g020.1; Cse_sc013821.1_g040.1; Cse_sc014457.1_g020.1; Cse_sc024691.1_g010.1; Cse_sc026468.1_g010.1
GO:0009969	xyloglucan biosynthetic process	biological_process	4	6179	14	55481	0.014425934	0.041901403	2.565417428	Cse_sc000139.1_g090.1; Cse_sc004256.1_g050.1; Cse_sc021978.1_g030.1; Cse_sc039922.1_g030.1
GO:0044255	cellular lipid metabolic process	biological_process	4	6179	14	55481	0.014425934	0.041901403	2.565417428	Cse_sc000334.1_g010.1; Cse_sc000929.1_g130.1; Cse_sc002590.1_g010.1; Cse_sc018862.1_g020.1
GO:0048766	root hair initiation	biological_process	4	6179	14	55481	0.014425934	0.041901403	2.565417428	Cse_sc000429.1_g040.1; Cse_sc003585.1_g060.1; Cse_sc005662.1_g040.1; Cse_sc014514.1_g030.1
GO:0010192	mucilage biosynthetic process	biological_process	4	6179	14	55481	0.014425934	0.041901403	2.565417428	Cse_sc000430.1_g010.1; Cse_sc007079.1_g060.1; Cse_sc007214.1_g060.1; Cse_sc065881.1_g010.1
GO:0090698	post-embryonic plant morphogenesis	biological_process	4	6179	14	55481	0.014425934	0.041901403	2.565417428	Cse_sc000906.1_g080.1; Cse_sc003177.1_g070.1; Cse_sc013575.1_g040.1; Cse_sc016091.1_g010.1
GO:0045876	positive regulation of sister chromatid cohesion	biological_process	4	6179	14	55481	0.014425934	0.041901403	2.565417428	Cse_sc001060.1_g030.1; Cse_sc012911.1_g020.1; Cse_sc014001.1_g020.1; Cse_sc026658.1_g010.1
GO:1990641	response to iron ion starvation	biological_process	4	6179	14	55481	0.014425934	0.041901403	2.565417428	Cse_sc001345.1_g010.1; Cse_sc001664.1_g060.1; Cse_sc003699.1_g030.1; Cse_sc006852.1_g010.1
GO:0006644	phospholipid metabolic process	biological_process	4	6179	14	55481	0.014425934	0.041901403	2.565417428	Cse_sc009581.1_g010.1; Cse_sc012730.1_g040.1; Cse_sc024568.1_g020.1; Cse_sc034964.1_g020.1
GO:0010427	abscisic acid binding	molecular_function	4	6179	14	55481	0.014425934	0.041901403	2.565417428	Cse_sc010384.1_g010.1; Cse_sc012195.1_g020.1; Cse_sc022521.1_g020.1; Cse_sc022773.1_g020.1
GO:0080163	regulation of protein serine/threonine phosphatase activity	biological_process	4	6179	14	55481	0.014425934	0.041901403	2.565417428	Cse_sc010384.1_g010.1; Cse_sc012195.1_g020.1; Cse_sc022521.1_g020.1; Cse_sc022773.1_g020.1
GO:0045926	negative regulation of growth	biological_process	4	6179	14	55481	0.014425934	0.041901403	2.565417428	Cse_sc015414.1_g020.1; Cse_sc022290.1_g020.1; Cse_sc022722.1_g040.1; Cse_sc036425.1_g010.1
GO:0006805	xenobiotic metabolic process	biological_process	7	6179	30	55481	0.014514485	0.042127923	2.095090899	Cse_sc000380.1_g120.1; Cse_sc001853.1_g020.1; Cse_sc003421.1_g030.1; Cse_sc005906.1_g050.1; Cse_sc029819.1_g010.1; Cse_sc062855.1_g010.1; Cse_sc063774.1_g010.1
GO:0016616	oxidoreductase activity, acting on the CH-OH group of donors, NAD or NADP as acceptor	molecular_function	13	6179	67	55481	0.01455152	0.042204699	1.742186462	Cse_sc003027.1_g030.1; Cse_sc003378.1_g060.1; Cse_sc006145.1_g030.1; Cse_sc008164.1_g030.1; Cse_sc008261.1_g010.1; Cse_sc017802.1_g020.1; Cse_sc019228.1_g020.1; Cse_sc023125.1_g030.1; Cse_sc036151.1_g010.1; Cse_sc036390.1_g010.1; Cse_sc038893.1_g030.1; Cse_sc060611.1_g010.1; Cse_sc066161.1_g010.1
GO:0071249	cellular response to nitrate	biological_process	8	6179	36	55481	0.015043199	0.043572528	1.995324666	Cse_sc002327.1_g070.1; Cse_sc003350.1_g030.1; Cse_sc004009.1_g050.1; Cse_sc009891.1_g010.1; Cse_sc012919.1_g010.1; Cse_sc020211.1_g020.1; Cse_sc023130.1_g020.1; Cse_sc037579.1_g010.1
GO:0010189	vitamin E biosynthetic process	biological_process	9	6179	42	55481	0.015055904	0.043572528	1.924063071	Cse_sc001487.1_g030.1; Cse_sc003230.1_g030.1; Cse_sc004138.1_g060.1; Cse_sc007289.1_g010.1; Cse_sc008903.1_g020.1; Cse_sc027671.1_g010.1; Cse_sc045596.1_g010.1; Cse_sc241107.1_g010.1; Cse_sc241491.1_g010.1
GO:0005384	manganese ion transmembrane transporter activity	molecular_function	9	6179	42	55481	0.015055904	0.043572528	1.924063071	Cse_sc002714.1_g010.1; Cse_sc003276.1_g040.1; Cse_sc016149.1_g010.1; Cse_sc019890.1_g030.1; Cse_sc020936.1_g020.1; Cse_sc021232.1_g010.1; Cse_sc025232.1_g030.1; Cse_sc039398.1_g010.1; Cse_sc060317.1_g010.1
GO:0004672	protein kinase activity	molecular_function	61	6179	423	55481	0.015238246	0.044068257	1.294838347	Cse_sc000067.1_g030.1; Cse_sc000155.1_g010.1; Cse_sc000298.1_g080.1; Cse_sc000429.1_g040.1; Cse_sc000615.1_g030.1; Cse_sc001011.1_g060.1; Cse_sc002223.1_g060.1; Cse_sc002494.1_g050.1; Cse_sc002883.1_g040.1; Cse_sc003043.1_g070.1; Cse_sc003585.1_g060.1; Cse_sc004241.1_g050.1; Cse_sc004980.1_g010.1; Cse_sc005021.1_g050.1; Cse_sc005081.1_g020.1; Cse_sc005455.1_g070.1; Cse_sc006488.1_g040.1; Cse_sc00…
GO:0004721	phosphoprotein phosphatase activity	molecular_function	23	6179	136	55481	0.015280214	0.044157603	1.518500757	Cse_sc000409.1_g070.1; Cse_sc000766.1_g060.1; Cse_sc002049.1_g040.1; Cse_sc005631.1_g020.1; Cse_sc005899.1_g020.1; Cse_sc006644.1_g060.1; Cse_sc010088.1_g010.1; Cse_sc010602.1_g020.1; Cse_sc015752.1_g010.1; Cse_sc016395.1_g030.1; Cse_sc017546.1_g020.1; Cse_sc019696.1_g010.1; Cse_sc022422.1_g010.1; Cse_sc025528.1_g010.1; Cse_sc025874.1_g010.1; Cse_sc027195.1_g010.1; Cse_sc028222.1_g010.1; Cse_sc02…
GO:0006071	glycerol metabolic process	biological_process	11	6179	55	55481	0.016363537	0.047254009	1.795792199	Cse_sc001199.1_g020.1; Cse_sc001218.1_g020.1; Cse_sc003163.1_g060.1; Cse_sc003313.1_g050.1; Cse_sc006738.1_g020.1; Cse_sc008264.1_g020.1; Cse_sc011710.1_g010.1; Cse_sc012134.1_g030.1; Cse_sc019218.1_g030.1; Cse_sc020797.1_g010.1; Cse_sc026804.1_g010.1
GO:0045489	pectin biosynthetic process	biological_process	13	6179	68	55481	0.016496466	0.047534615	1.716566073	Cse_sc000080.1_g080.1; Cse_sc000623.1_g100.1; Cse_sc001131.1_g110.1; Cse_sc003507.1_g030.1; Cse_sc005205.1_g020.1; Cse_sc006523.1_g030.1; Cse_sc008042.1_g050.1; Cse_sc013527.1_g010.1; Cse_sc022430.1_g020.1; Cse_sc023368.1_g030.1; Cse_sc031238.1_g010.1; Cse_sc034008.1_g020.1; Cse_sc036161.1_g020.1
GO:0009058	biosynthetic process	biological_process	13	6179	68	55481	0.016496466	0.047534615	1.716566073	Cse_sc000434.1_g110.1; Cse_sc000920.1_g100.1; Cse_sc000928.1_g050.1; Cse_sc004118.1_g020.1; Cse_sc006533.1_g020.1; Cse_sc008063.1_g050.1; Cse_sc019697.1_g040.1; Cse_sc023626.1_g010.1; Cse_sc025526.1_g030.1; Cse_sc030981.1_g010.1; Cse_sc034207.1_g020.1; Cse_sc043257.1_g010.1; Cse_sc044524.1_g020.1
GO:0050662	coenzyme binding	molecular_function	13	6179	68	55481	0.016496466	0.047534615	1.716566073	Cse_sc001919.1_g050.1; Cse_sc003027.1_g030.1; Cse_sc006145.1_g030.1; Cse_sc007092.1_g070.1; Cse_sc008261.1_g010.1; Cse_sc017322.1_g040.1; Cse_sc023125.1_g030.1; Cse_sc026481.1_g040.1; Cse_sc030176.1_g030.1; Cse_sc036151.1_g010.1; Cse_sc038893.1_g030.1; Cse_sc060611.1_g010.1; Cse_sc066161.1_g010.1
GO:0007076	mitotic chromosome condensation	biological_process	10	6179	49	55481	0.017134409	0.049337201	1.83244102	Cse_sc000134.1_g080.1; Cse_sc005526.1_g010.1; Cse_sc005526.1_g020.1; Cse_sc008193.1_g020.1; Cse_sc012451.1_g010.1; Cse_sc027573.1_g020.1; Cse_sc035562.1_g010.1; Cse_sc046351.1_g020.1; Cse_sc057488.1_g010.1; Cse_sc075940.1_g010.1
GO:0002238	response to molecule of fungal origin	biological_process	14	6179	75	55481	0.017270926	0.04969441	1.676072719	Cse_sc000037.1_g120.1; Cse_sc003163.1_g070.1; Cse_sc003369.1_g060.1; Cse_sc004284.1_g080.1; Cse_sc004385.1_g070.1; Cse_sc004426.1_g010.1; Cse_sc005865.1_g020.1; Cse_sc006992.1_g020.1; Cse_sc007594.1_g020.1; Cse_sc009257.1_g020.1; Cse_sc012827.1_g010.1; Cse_sc016098.1_g040.1; Cse_sc027013.1_g040.1; Cse_sc052739.1_g020.1
GO:0030036	actin cytoskeleton organization	biological_process	12	6179	62	55481	0.017648094	0.050743042	1.737863419	Cse_sc000564.1_g020.1; Cse_sc001090.1_g030.1; Cse_sc005960.1_g030.1; Cse_sc012462.1_g030.1; Cse_sc014682.1_g030.1; Cse_sc019612.1_g020.1; Cse_sc019962.1_g010.1; Cse_sc020442.1_g020.1; Cse_sc022607.1_g030.1; Cse_sc023762.1_g010.1; Cse_sc027349.1_g020.1; Cse_sc032529.1_g010.1
GO:0010215	cellulose microfibril organization	biological_process	7	6179	31	55481	0.017698207	0.050812437	2.027507322	Cse_sc000989.1_g040.1; Cse_sc000999.1_g060.1; Cse_sc004096.1_g110.1; Cse_sc006473.1_g010.1; Cse_sc017118.1_g030.1; Cse_sc018106.1_g010.1; Cse_sc019033.1_g020.1
GO:0008285	negative regulation of cell proliferation	biological_process	7	6179	31	55481	0.017698207	0.050812437	2.027507322	Cse_sc001149.1_g060.1; Cse_sc001844.1_g050.1; Cse_sc004468.1_g030.1; Cse_sc020467.1_g020.1; Cse_sc025397.1_g030.1; Cse_sc049061.1_g010.1; Cse_sc054117.1_g010.1
GO:0008236	serine-type peptidase activity	molecular_function	9	6179	43	55481	0.017710453	0.050812437	1.879317418	Cse_sc001952.1_g010.1; Cse_sc002103.1_g050.1; Cse_sc002103.1_g060.1; Cse_sc006634.1_g010.1; Cse_sc009541.1_g030.1; Cse_sc010544.1_g050.1; Cse_sc017754.1_g030.1; Cse_sc029721.1_g020.1; Cse_sc047029.1_g020.1
GO:0030026	cellular manganese ion homeostasis	biological_process	8	6179	37	55481	0.017963038	0.051500068	1.941396972	Cse_sc012718.1_g010.1; Cse_sc015080.1_g020.1; Cse_sc019890.1_g030.1; Cse_sc020936.1_g020.1; Cse_sc021232.1_g010.1; Cse_sc023754.1_g010.1; Cse_sc025232.1_g030.1; Cse_sc060317.1_g010.1
GO:0030665	clathrin-coated vesicle membrane	cellular_component	5	6179	20	55481	0.018553939	0.052456571	2.244740249	Cse_sc000006.1_g210.1; Cse_sc015362.1_g030.1; Cse_sc018611.1_g020.1; Cse_sc020154.1_g010.1; Cse_sc027137.1_g020.1
GO:0099402	plant organ development	biological_process	5	6179	20	55481	0.018553939	0.052456571	2.244740249	Cse_sc001315.1_g020.1; Cse_sc002363.1_g060.1; Cse_sc004241.1_g050.1; Cse_sc032604.1_g040.1; Cse_sc033510.1_g020.1
GO:0030042	actin filament depolymerization	biological_process	5	6179	20	55481	0.018553939	0.052456571	2.244740249	Cse_sc001732.1_g030.1; Cse_sc002679.1_g040.1; Cse_sc002945.1_g030.1; Cse_sc003896.1_g060.1; Cse_sc061975.1_g020.1
GO:0047412	N-(long-chain-acyl)ethanolamine deacylase activity	molecular_function	3	6179	10	55481	0.018559735	0.052456571	2.693688299	Cse_sc000050.1_g150.1; Cse_sc000188.1_g090.1; Cse_sc004790.1_g070.1
GO:0070291	N-acylethanolamine metabolic process	biological_process	3	6179	10	55481	0.018559735	0.052456571	2.693688299	Cse_sc000050.1_g150.1; Cse_sc000188.1_g090.1; Cse_sc004790.1_g070.1
GO:0102077	oleamide hydrolase activity	molecular_function	3	6179	10	55481	0.018559735	0.052456571	2.693688299	Cse_sc000050.1_g150.1; Cse_sc000188.1_g090.1; Cse_sc004790.1_g070.1
GO:0103073	anandamide amidohydrolase activity	molecular_function	3	6179	10	55481	0.018559735	0.052456571	2.693688299	Cse_sc000050.1_g150.1; Cse_sc000188.1_g090.1; Cse_sc004790.1_g070.1
GO:1990748	cellular detoxification	biological_process	3	6179	10	55481	0.018559735	0.052456571	2.693688299	Cse_sc000133.1_g050.1; Cse_sc003845.1_g020.1; Cse_sc008589.1_g020.1
GO:0050505	hydroquinone glucosyltransferase activity	molecular_function	3	6179	10	55481	0.018559735	0.052456571	2.693688299	Cse_sc000380.1_g110.1; Cse_sc000380.1_g120.1; Cse_sc037423.1_g030.1
GO:0010133	proline catabolic process to glutamate	biological_process	3	6179	10	55481	0.018559735	0.052456571	2.693688299	Cse_sc000439.1_g080.1; Cse_sc019782.1_g020.1; Cse_sc024615.1_g040.1
GO:0006555	methionine metabolic process	biological_process	3	6179	10	55481	0.018559735	0.052456571	2.693688299	Cse_sc000604.1_g050.1; Cse_sc001880.1_g070.1; Cse_sc018968.1_g020.1
GO:0004837	tyrosine decarboxylase activity	molecular_function	3	6179	10	55481	0.018559735	0.052456571	2.693688299	Cse_sc000889.1_g020.1; Cse_sc003099.1_g010.1; Cse_sc010460.1_g030.1
GO:2000067	regulation of root morphogenesis	biological_process	3	6179	10	55481	0.018559735	0.052456571	2.693688299	Cse_sc000989.1_g040.1; Cse_sc018106.1_g010.1; Cse_sc025397.1_g030.1
GO:0047162	17-O-deacetylvindoline O-acetyltransferase activity	molecular_function	3	6179	10	55481	0.018559735	0.052456571	2.693688299	Cse_sc001094.1_g030.1; Cse_sc005773.1_g040.1; Cse_sc016321.1_g010.1
GO:0033160	positive regulation of protein import into nucleus, translocation	biological_process	3	6179	10	55481	0.018559735	0.052456571	2.693688299	Cse_sc001269.1_g070.1; Cse_sc002660.1_g020.1; Cse_sc007383.1_g030.1
GO:0006344	maintenance of chromatin silencing	biological_process	3	6179	10	55481	0.018559735	0.052456571	2.693688299	Cse_sc003133.1_g020.1; Cse_sc008744.1_g050.1; Cse_sc012208.1_g030.1
GO:0032511	late endosome to vacuole transport via multivesicular body sorting pathway	biological_process	3	6179	10	55481	0.018559735	0.052456571	2.693688299	Cse_sc009370.1_g030.1; Cse_sc020758.1_g030.1; Cse_sc025613.1_g020.1
GO:0048439	flower morphogenesis	biological_process	3	6179	10	55481	0.018559735	0.052456571	2.693688299	Cse_sc010875.1_g020.1; Cse_sc015414.1_g020.1; Cse_sc030651.1_g010.1
GO:0047213	anthocyanidin 3-O-glucosyltransferase activity	molecular_function	3	6179	10	55481	0.018559735	0.052456571	2.693688299	Cse_sc014035.1_g020.1; Cse_sc040693.1_g020.1; Cse_sc053331.1_g010.1
GO:0051016	barbed-end actin filament capping	biological_process	3	6179	10	55481	0.018559735	0.052456571	2.693688299	Cse_sc019612.1_g020.1; Cse_sc023762.1_g010.1; Cse_sc032529.1_g010.1
GO:0016036	cellular response to phosphate starvation	biological_process	20	6179	117	55481	0.018600596	0.052534827	1.534865128	Cse_sc000067.1_g060.1; Cse_sc000512.1_g020.1; Cse_sc000885.1_g050.1; Cse_sc003933.1_g010.1; Cse_sc005545.1_g040.1; Cse_sc006320.1_g050.1; Cse_sc007265.1_g020.1; Cse_sc008975.1_g030.1; Cse_sc009413.1_g020.1; Cse_sc010081.1_g040.1; Cse_sc010602.1_g020.1; Cse_sc011874.1_g030.1; Cse_sc013686.1_g010.1; Cse_sc016068.1_g010.1; Cse_sc017778.1_g010.1; Cse_sc018600.1_g010.1; Cse_sc024226.1_g010.1; Cse_sc03…
GO:0042803	protein homodimerization activity	molecular_function	48	6179	326	55481	0.018655156	0.052651637	1.322055607	Cse_sc000860.1_g020.1; Cse_sc000936.1_g070.1; Cse_sc001808.1_g040.1; Cse_sc002591.1_g010.1; Cse_sc003052.1_g020.1; Cse_sc003133.1_g020.1; Cse_sc003571.1_g070.1; Cse_sc004256.1_g050.1; Cse_sc004288.1_g020.1; Cse_sc004876.1_g010.1; Cse_sc005145.1_g030.1; Cse_sc005633.1_g050.1; Cse_sc006030.1_g060.1; Cse_sc006097.1_g050.1; Cse_sc006155.1_g060.1; Cse_sc006206.1_g020.1; Cse_sc007497.1_g020.1; Cse_sc00…
GO:0010540	basipetal auxin transport	biological_process	11	6179	56	55481	0.018773362	0.052947784	1.763724482	Cse_sc000939.1_g040.1; Cse_sc000944.1_g030.1; Cse_sc001305.1_g010.1; Cse_sc001373.1_g090.1; Cse_sc002153.1_g070.1; Cse_sc003113.1_g010.1; Cse_sc008667.1_g010.1; Cse_sc011211.1_g010.1; Cse_sc022493.1_g020.1; Cse_sc037310.1_g020.1; Cse_sc037388.1_g020.1
GO:0016871	cycloartenol synthase activity	molecular_function	4	6179	15	55481	0.019688879	0.055062586	2.394389599	Cse_sc001748.1_g090.1; Cse_sc034129.1_g010.1; Cse_sc035085.1_g010.1; Cse_sc036121.1_g020.1
GO:0019745	pentacyclic triterpenoid biosynthetic process	biological_process	4	6179	15	55481	0.019688879	0.055062586	2.394389599	Cse_sc001748.1_g090.1; Cse_sc034129.1_g010.1; Cse_sc035085.1_g010.1; Cse_sc036121.1_g020.1
GO:0015175	neutral amino acid transmembrane transporter activity	molecular_function	4	6179	15	55481	0.019688879	0.055062586	2.394389599	Cse_sc003135.1_g020.1; Cse_sc007753.1_g010.1; Cse_sc031881.1_g020.1; Cse_sc045494.1_g020.1
GO:0022900	electron transport chain	biological_process	4	6179	15	55481	0.019688879	0.055062586	2.394389599	Cse_sc003444.1_g060.1; Cse_sc015510.1_g030.1; Cse_sc016502.1_g030.1; Cse_sc018706.1_g010.1
GO:0007035	vacuolar acidification	biological_process	4	6179	15	55481	0.019688879	0.055062586	2.394389599	Cse_sc003484.1_g030.1; Cse_sc003484.1_g050.1; Cse_sc005780.1_g090.1; Cse_sc030388.1_g010.1
GO:0031222	arabinan catabolic process	biological_process	4	6179	15	55481	0.019688879	0.055062586	2.394389599	Cse_sc003798.1_g110.1; Cse_sc006195.1_g020.1; Cse_sc019970.1_g010.1; Cse_sc065557.1_g010.1
GO:0034517	ribophagy	biological_process	4	6179	15	55481	0.019688879	0.055062586	2.394389599	Cse_sc004352.1_g060.1; Cse_sc013495.1_g020.1; Cse_sc019729.1_g020.1; Cse_sc023661.1_g010.1
GO:0032588	trans-Golgi network membrane	cellular_component	4	6179	15	55481	0.019688879	0.055062586	2.394389599	Cse_sc007302.1_g020.1; Cse_sc009120.1_g030.1; Cse_sc014119.1_g010.1; Cse_sc027600.1_g010.1
GO:0015189	L-lysine transmembrane transporter activity	molecular_function	4	6179	15	55481	0.019688879	0.055062586	2.394389599	Cse_sc010380.1_g020.1; Cse_sc013124.1_g010.1; Cse_sc016333.1_g010.1; Cse_sc030860.1_g010.1
GO:0005345	purine nucleobase transmembrane transporter activity	molecular_function	4	6179	15	55481	0.019688879	0.055062586	2.394389599	Cse_sc010754.1_g050.1; Cse_sc011223.1_g010.1; Cse_sc011290.1_g020.1; Cse_sc016808.1_g030.1
GO:0006863	purine nucleobase transport	biological_process	4	6179	15	55481	0.019688879	0.055062586	2.394389599	Cse_sc010754.1_g050.1; Cse_sc011223.1_g010.1; Cse_sc011290.1_g020.1; Cse_sc016808.1_g030.1
GO:0006882	cellular zinc ion homeostasis	biological_process	4	6179	15	55481	0.019688879	0.055062586	2.394389599	Cse_sc012718.1_g010.1; Cse_sc013502.1_g020.1; Cse_sc015080.1_g020.1; Cse_sc023754.1_g010.1
GO:0009682	induced systemic resistance	biological_process	10	6179	50	55481	0.019817002	0.055382063	1.795792199	Cse_sc000001.1_g170.1; Cse_sc002631.1_g040.1; Cse_sc003214.1_g050.1; Cse_sc007503.1_g060.1; Cse_sc008685.1_g020.1; Cse_sc012106.1_g040.1; Cse_sc019860.1_g020.1; Cse_sc021738.1_g020.1; Cse_sc031741.1_g020.1; Cse_sc036892.1_g010.1
GO:0008284	positive regulation of cell proliferation	biological_process	18	6179	104	55481	0.020479562	0.057193624	1.554050942	Cse_sc000321.1_g080.1; Cse_sc000343.1_g040.1; Cse_sc000383.1_g020.1; Cse_sc001315.1_g020.1; Cse_sc003020.1_g020.1; Cse_sc003509.1_g050.1; Cse_sc003573.1_g020.1; Cse_sc003721.1_g030.1; Cse_sc003799.1_g080.1; Cse_sc004509.1_g020.1; Cse_sc009189.1_g040.1; Cse_sc009402.1_g020.1; Cse_sc009411.1_g030.1; Cse_sc010690.1_g020.1; Cse_sc012525.1_g030.1; Cse_sc014813.1_g020.1; Cse_sc028098.1_g020.1; Cse_sc03…
GO:0045551	cinnamyl-alcohol dehydrogenase activity	molecular_function	6	6179	26	55481	0.020612822	0.057306348	2.072067922	Cse_sc000122.1_g030.1; Cse_sc003157.1_g080.1; Cse_sc004549.1_g090.1; Cse_sc006103.1_g010.1; Cse_sc006242.1_g060.1; Cse_sc007130.1_g010.1
GO:0052747	sinapyl alcohol dehydrogenase activity	molecular_function	6	6179	26	55481	0.020612822	0.057306348	2.072067922	Cse_sc000122.1_g030.1; Cse_sc003157.1_g080.1; Cse_sc004549.1_g090.1; Cse_sc006103.1_g010.1; Cse_sc006242.1_g060.1; Cse_sc007130.1_g010.1
GO:0042555	MCM complex	cellular_component	6	6179	26	55481	0.020612822	0.057306348	2.072067922	Cse_sc001698.1_g050.1; Cse_sc002860.1_g050.1; Cse_sc005893.1_g050.1; Cse_sc009540.1_g040.1; Cse_sc012137.1_g010.1; Cse_sc057393.1_g010.1
GO:0048830	adventitious root development	biological_process	6	6179	26	55481	0.020612822	0.057306348	2.072067922	Cse_sc002631.1_g040.1; Cse_sc003943.1_g020.1; Cse_sc006323.1_g010.1; Cse_sc007503.1_g060.1; Cse_sc012106.1_g040.1; Cse_sc019860.1_g020.1
GO:0010305	leaf vascular tissue pattern formation	biological_process	9	6179	44	55481	0.020694095	0.057306348	1.836605658	Cse_sc000939.1_g040.1; Cse_sc003505.1_g040.1; Cse_sc006426.1_g080.1; Cse_sc007822.1_g050.1; Cse_sc012515.1_g020.1; Cse_sc012530.1_g050.1; Cse_sc014421.1_g050.1; Cse_sc018680.1_g010.1; Cse_sc019248.1_g050.1
GO:0008219	cell death	biological_process	13	6179	70	55481	0.020973875	0.057306348	1.667521328	Cse_sc000076.1_g020.1; Cse_sc002695.1_g090.1; Cse_sc003901.1_g050.1; Cse_sc003982.1_g020.1; Cse_sc004818.1_g060.1; Cse_sc006615.1_g020.1; Cse_sc009118.1_g060.1; Cse_sc011714.1_g030.1; Cse_sc013674.1_g010.1; Cse_sc026733.1_g010.1; Cse_sc028534.1_g010.1; Cse_sc031268.1_g020.1; Cse_sc050936.1_g010.1
GO:0005385	zinc ion transmembrane transporter activity	molecular_function	8	6179	38	55481	0.021273784	0.057306348	1.890307578	Cse_sc000918.1_g030.1; Cse_sc001321.1_g050.1; Cse_sc004213.1_g050.1; Cse_sc012969.1_g010.1; Cse_sc013502.1_g020.1; Cse_sc016089.1_g010.1; Cse_sc025440.1_g010.1; Cse_sc026717.1_g010.1
GO:0046620	regulation of organ growth	biological_process	2	6179	6	55481	0.02129589	0.057306348	2.992986999	Cse_sc000009.1_g010.1; Cse_sc004216.1_g030.1
GO:0009652	thigmotropism	biological_process	2	6179	6	55481	0.02129589	0.057306348	2.992986999	Cse_sc000221.1_g090.1; Cse_sc004509.1_g040.1
GO:0010971	positive regulation of G2/M transition of mitotic cell cycle	biological_process	2	6179	6	55481	0.02129589	0.057306348	2.992986999	Cse_sc000383.1_g020.1; Cse_sc008075.1_g020.1
GO:0036310	annealing helicase activity	molecular_function	2	6179	6	55481	0.02129589	0.057306348	2.992986999	Cse_sc000383.1_g020.1; Cse_sc044107.1_g010.1
GO:0050891	multicellular organismal water homeostasis	biological_process	2	6179	6	55481	0.02129589	0.057306348	2.992986999	Cse_sc000586.1_g080.1; Cse_sc081552.1_g010.1
GO:0006569	tryptophan catabolic process	biological_process	2	6179	6	55481	0.02129589	0.057306348	2.992986999	Cse_sc000604.1_g050.1; Cse_sc018968.1_g020.1
GO:0010366	negative regulation of ethylene biosynthetic process	biological_process	2	6179	6	55481	0.02129589	0.057306348	2.992986999	Cse_sc000604.1_g050.1; Cse_sc018968.1_g020.1
GO:0004392	heme oxygenase (decyclizing) activity	molecular_function	2	6179	6	55481	0.02129589	0.057306348	2.992986999	Cse_sc000681.1_g060.1; Cse_sc028235.1_g010.1
GO:0004058	aromatic-L-amino-acid decarboxylase activity	molecular_function	2	6179	6	55481	0.02129589	0.057306348	2.992986999	Cse_sc000889.1_g020.1; Cse_sc003099.1_g010.1
GO:0051211	anisotropic cell growth	biological_process	2	6179	6	55481	0.02129589	0.057306348	2.992986999	Cse_sc000989.1_g040.1; Cse_sc018106.1_g010.1
GO:0072699	protein localization to cortical microtubule cytoskeleton	biological_process	2	6179	6	55481	0.02129589	0.057306348	2.992986999	Cse_sc000989.1_g040.1; Cse_sc018106.1_g010.1
GO:0004623	phospholipase A2 activity	molecular_function	2	6179	6	55481	0.02129589	0.057306348	2.992986999	Cse_sc001233.1_g060.1; Cse_sc017985.1_g040.1
GO:0008891	glycolate oxidase activity	molecular_function	2	6179	6	55481	0.02129589	0.057306348	2.992986999	Cse_sc001388.1_g060.1; Cse_sc029402.1_g010.1
GO:0046473	phosphatidic acid metabolic process	biological_process	2	6179	6	55481	0.02129589	0.057306348	2.992986999	Cse_sc001462.1_g040.1; Cse_sc025144.1_g030.1
GO:0050734	hydroxycinnamoyltransferase activity	molecular_function	2	6179	6	55481	0.02129589	0.057306348	2.992986999	Cse_sc001584.1_g040.1; Cse_sc005158.1_g030.1
GO:0102406	omega-hydroxypalmitate O-sinapoyl transferase activity	molecular_function	2	6179	6	55481	0.02129589	0.057306348	2.992986999	Cse_sc001584.1_g040.1; Cse_sc005158.1_g030.1
GO:0046294	formaldehyde catabolic process	biological_process	2	6179	6	55481	0.02129589	0.057306348	2.992986999	Cse_sc001748.1_g010.1; Cse_sc006323.1_g040.1
GO:0031304	intrinsic component of mitochondrial inner membrane	cellular_component	2	6179	6	55481	0.02129589	0.057306348	2.992986999	Cse_sc001873.1_g050.1; Cse_sc003912.1_g050.1
GO:0015824	proline transport	biological_process	2	6179	6	55481	0.02129589	0.057306348	2.992986999	Cse_sc002728.1_g020.1; Cse_sc027050.1_g030.1
GO:0010442	guard cell morphogenesis	biological_process	2	6179	6	55481	0.02129589	0.057306348	2.992986999	Cse_sc003313.1_g050.1; Cse_sc011710.1_g010.1
GO:0052541	plant-type cell wall cellulose metabolic process	biological_process	2	6179	6	55481	0.02129589	0.057306348	2.992986999	Cse_sc003313.1_g050.1; Cse_sc011710.1_g010.1
GO:0004128	cytochrome-b5 reductase activity, acting on NAD(P)H	molecular_function	2	6179	6	55481	0.02129589	0.057306348	2.992986999	Cse_sc003444.1_g060.1; Cse_sc016502.1_g030.1
GO:0046577	long-chain-alcohol oxidase activity	molecular_function	2	6179	6	55481	0.02129589	0.057306348	2.992986999	Cse_sc003621.1_g050.1; Cse_sc004244.1_g060.1
GO:0043085	positive regulation of catalytic activity	biological_process	2	6179	6	55481	0.02129589	0.057306348	2.992986999	Cse_sc004072.1_g020.1; Cse_sc039562.1_g010.1
GO:0080036	regulation of cytokinin-activated signaling pathway	biological_process	2	6179	6	55481	0.02129589	0.057306348	2.992986999	Cse_sc004141.1_g040.1; Cse_sc007911.1_g010.1
GO:0048442	sepal development	biological_process	2	6179	6	55481	0.02129589	0.057306348	2.992986999	Cse_sc004288.1_g020.1; Cse_sc005633.1_g050.1
GO:1902981	synthesis of RNA primer involved in mitotic DNA replication	biological_process	2	6179	6	55481	0.02129589	0.057306348	2.992986999	Cse_sc004717.1_g060.1; Cse_sc032448.1_g010.1
GO:0009943	adaxial/abaxial axis specification	biological_process	2	6179	6	55481	0.02129589	0.057306348	2.992986999	Cse_sc004990.1_g020.1; Cse_sc013039.1_g020.1
GO:0019374	galactolipid metabolic process	biological_process	2	6179	6	55481	0.02129589	0.057306348	2.992986999	Cse_sc005545.1_g040.1; Cse_sc009581.1_g010.1
GO:0016207	4-coumarate-CoA ligase activity	molecular_function	2	6179	6	55481	0.02129589	0.057306348	2.992986999	Cse_sc005747.1_g070.1; Cse_sc013241.1_g010.1
GO:0009799	specification of symmetry	biological_process	2	6179	6	55481	0.02129589	0.057306348	2.992986999	Cse_sc005798.1_g050.1; Cse_sc013039.1_g020.1
GO:0010475	galactose-1-phosphate guanylyltransferase (GDP) activity	molecular_function	2	6179	6	55481	0.02129589	0.057306348	2.992986999	Cse_sc006385.1_g020.1; Cse_sc007770.1_g020.1
GO:0080047	GDP-L-galactose phosphorylase activity	molecular_function	2	6179	6	55481	0.02129589	0.057306348	2.992986999	Cse_sc006385.1_g020.1; Cse_sc007770.1_g020.1
GO:0080048	GDP-D-glucose phosphorylase activity	molecular_function	2	6179	6	55481	0.02129589	0.057306348	2.992986999	Cse_sc006385.1_g020.1; Cse_sc007770.1_g020.1
GO:0015858	nucleoside transport	biological_process	2	6179	6	55481	0.02129589	0.057306348	2.992986999	Cse_sc006954.1_g020.1; Cse_sc020557.1_g030.1
GO:0055035	plastid thylakoid membrane	cellular_component	2	6179	6	55481	0.02129589	0.057306348	2.992986999	Cse_sc007168.1_g030.1; Cse_sc008499.1_g020.1
GO:0001676	long-chain fatty acid metabolic process	biological_process	2	6179	6	55481	0.02129589	0.057306348	2.992986999	Cse_sc007448.1_g030.1; Cse_sc009590.1_g070.1
GO:0051258	protein polymerization	biological_process	2	6179	6	55481	0.02129589	0.057306348	2.992986999	Cse_sc007582.1_g010.1; Cse_sc014094.1_g030.1
GO:0006596	polyamine biosynthetic process	biological_process	2	6179	6	55481	0.02129589	0.057306348	2.992986999	Cse_sc009252.1_g030.1; Cse_sc010876.1_g010.1
GO:0004740	pyruvate dehydrogenase (acetyl-transferring) kinase activity	molecular_function	2	6179	6	55481	0.02129589	0.057306348	2.992986999	Cse_sc009293.1_g020.1; Cse_sc020471.1_g020.1
GO:0032922	circadian regulation of gene expression	biological_process	2	6179	6	55481	0.02129589	0.057306348	2.992986999	Cse_sc010213.1_g020.1; Cse_sc027437.1_g010.1
GO:1905393	plant organ formation	biological_process	2	6179	6	55481	0.02129589	0.057306348	2.992986999	Cse_sc010635.1_g010.1; Cse_sc015652.1_g010.1
GO:0051669	fructan beta-fructosidase activity	molecular_function	2	6179	6	55481	0.02129589	0.057306348	2.992986999	Cse_sc013108.1_g040.1; Cse_sc040287.1_g030.1
GO:0002215	defense response to nematode	biological_process	2	6179	6	55481	0.02129589	0.057306348	2.992986999	Cse_sc020192.1_g020.1; Cse_sc032603.1_g010.1
GO:0042132	fructose 1,6-bisphosphate 1-phosphatase activity	molecular_function	2	6179	6	55481	0.02129589	0.057306348	2.992986999	Cse_sc021000.1_g010.1; Cse_sc027724.1_g010.1
GO:0010279	indole-3-acetic acid amido synthetase activity	molecular_function	2	6179	6	55481	0.02129589	0.057306348	2.992986999	Cse_sc021627.1_g010.1; Cse_sc052007.1_g010.1
GO:0043617	cellular response to sucrose starvation	biological_process	2	6179	6	55481	0.02129589	0.057306348	2.992986999	Cse_sc028497.1_g010.1; Cse_sc077363.1_g010.1
GO:0005622	intracellular	cellular_component	40	6179	267	55481	0.021346756	0.057404493	1.345162696	Cse_sc000464.1_g040.1; Cse_sc000744.1_g040.1; Cse_sc000830.1_g090.1; Cse_sc000877.1_g140.1; Cse_sc001090.1_g020.1; Cse_sc001094.1_g110.1; Cse_sc002195.1_g040.1; Cse_sc003567.1_g030.1; Cse_sc005433.1_g010.1; Cse_sc005471.1_g130.1; Cse_sc005553.1_g090.1; Cse_sc005759.1_g020.1; Cse_sc005838.1_g010.1; Cse_sc006678.1_g030.1; Cse_sc008141.1_g060.1; Cse_sc008436.1_g030.1; Cse_sc008926.1_g050.1; Cse_sc00…
GO:0031201	SNARE complex	cellular_component	15	6179	84	55481	0.022097983	0.059384607	1.603385892	Cse_sc001313.1_g010.1; Cse_sc001470.1_g080.1; Cse_sc003085.1_g020.1; Cse_sc004732.1_g040.1; Cse_sc007682.1_g010.1; Cse_sc008373.1_g020.1; Cse_sc017989.1_g030.1; Cse_sc021456.1_g020.1; Cse_sc021945.1_g030.1; Cse_sc022651.1_g020.1; Cse_sc027497.1_g070.1; Cse_sc028513.1_g010.1; Cse_sc031645.1_g020.1; Cse_sc034253.1_g010.1; Cse_sc038641.1_g010.1
GO:0006334	nucleosome assembly	biological_process	20	6179	119	55481	0.022164224	0.059522509	1.509069075	Cse_sc000556.1_g070.1; Cse_sc000936.1_g070.1; Cse_sc002623.1_g050.1; Cse_sc002820.1_g010.1; Cse_sc004091.1_g050.1; Cse_sc004621.1_g100.1; Cse_sc005158.1_g020.1; Cse_sc006057.1_g080.1; Cse_sc006066.1_g010.1; Cse_sc007142.1_g050.1; Cse_sc007255.1_g020.1; Cse_sc007456.1_g030.1; Cse_sc007465.1_g020.1; Cse_sc011743.1_g030.1; Cse_sc013260.1_g010.1; Cse_sc019134.1_g040.1; Cse_sc027574.1_g020.1; Cse_sc02…
GO:0008889	glycerophosphodiester phosphodiesterase activity	molecular_function	5	6179	21	55481	0.023583795	0.062995428	2.137847856	Cse_sc001199.1_g020.1; Cse_sc003313.1_g050.1; Cse_sc006738.1_g020.1; Cse_sc008264.1_g020.1; Cse_sc011710.1_g010.1
GO:0034707	chloride channel complex	cellular_component	5	6179	21	55481	0.023583795	0.062995428	2.137847856	Cse_sc001254.1_g040.1; Cse_sc030850.1_g010.1; Cse_sc044001.1_g010.1; Cse_sc053024.1_g010.1; Cse_sc053024.1_g020.1
GO:0030307	positive regulation of cell growth	biological_process	5	6179	21	55481	0.023583795	0.062995428	2.137847856	Cse_sc001794.1_g030.1; Cse_sc002594.1_g060.1; Cse_sc007648.1_g030.1; Cse_sc009413.1_g020.1; Cse_sc025023.1_g010.1
GO:0010588	cotyledon vascular tissue pattern formation	biological_process	5	6179	21	55481	0.023583795	0.062995428	2.137847856	Cse_sc003052.1_g020.1; Cse_sc006426.1_g080.1; Cse_sc007822.1_g050.1; Cse_sc016113.1_g010.1; Cse_sc044355.1_g010.1
GO:0071705	nitrogen compound transport	biological_process	5	6179	21	55481	0.023583795	0.062995428	2.137847856	Cse_sc003350.1_g030.1; Cse_sc009891.1_g010.1; Cse_sc012919.1_g010.1; Cse_sc020211.1_g020.1; Cse_sc023130.1_g020.1
GO:1990538	xylan O-acetyltransferase activity	molecular_function	5	6179	21	55481	0.023583795	0.062995428	2.137847856	Cse_sc004243.1_g040.1; Cse_sc004243.1_g080.1; Cse_sc006446.1_g020.1; Cse_sc023368.1_g030.1; Cse_sc026272.1_g020.1
GO:0010199	organ boundary specification between lateral organs and the meristem	biological_process	5	6179	21	55481	0.023583795	0.062995428	2.137847856	Cse_sc004397.1_g030.1; Cse_sc006503.1_g050.1; Cse_sc006803.1_g020.1; Cse_sc011146.1_g010.1; Cse_sc012039.1_g010.1
[truncated: 2,496 more rows]
