# Supplementary material for: Whole-transcriptome analysis of differentially expressed genes between ray and disc florets and identification of flowering regulatory genes in Chrysanthemum morifolium
Source: Front Plant Sci. 2022 Aug 4;13:947331. doi: 10.3389/fpls.2022.947331 (PMC9388166; doi:10.3389/fpls.2022.947331)
Supplement: Supplementary File 6 — Homologous genes in the flowering regulatory networks involved in the six major floral induction pathways of Chrysanthemum morifolium. [file Data_Sheet_3.XLS]

## Sheet: enrichment-kegg-PTS-vs-PTG-Tota
id	term	ListHits	ListTotal	PopHits	PopTotal	pval	padj	Enrichment_score	Gene
ko00944	Flavone and flavonol biosynthesis	2	1674	2	12025	0	0	7.18339	Cse_sc008018.1_g040.1; Cse_sc014540.1_g020.1
ko00363	Bisphenol degradation	2	1674	2	12025	0	0	7.18339	Cse_sc023683.1_g010.1; Cse_sc106281.1_g010.1
ko00624	Polycyclic aromatic hydrocarbon degradation	2	1674	2	12025	0	0	7.18339	Cse_sc023683.1_g010.1; Cse_sc106281.1_g010.1
ko01053	Biosynthesis of siderophore group nonribosomal peptides	2	1674	2	12025	0	0	7.18339	Cse_sc030981.1_g010.1; Cse_sc043257.1_g010.1
ko00062	Fatty acid elongation	33	1674	68	12025	1.28767e-12	4.89315e-11	3.48606	Cse_sc000834.1_g090.1; Cse_sc001048.1_g040.1; Cse_sc002006.1_g110.1; Cse_sc003484.1_g030.1; Cse_sc003484.1_g050.1; Cse_sc003566.1_g010.1; Cse_sc004647.1_g050.1; Cse_sc005296.1_g020.1; Cse_sc007482.1_g010.1; Cse_sc008550.1_g090.1; Cse_sc009705.1_g010.1; Cse_sc010173.1_g020.1; Cse_sc012878.1_g030.1; Cse_sc013490.1_g020.1; Cse_sc013492.1_g010.1; Cse_sc015088.1_g010.1; Cse_sc015700.1_g050.1; Cse_sc01…
ko00940	Phenylpropanoid biosynthesis	119	1674	484	12025	5.43216e-11	1.72019e-09	1.76616	Cse_sc000012.1_g140.1; Cse_sc000122.1_g030.1; Cse_sc000199.1_g050.1; Cse_sc000206.1_g160.1; Cse_sc000257.1_g050.1; Cse_sc000282.1_g110.1; Cse_sc000418.1_g060.1; Cse_sc000460.1_g130.1; Cse_sc000524.1_g040.1; Cse_sc001094.1_g030.1; Cse_sc001169.1_g010.1; Cse_sc001285.1_g020.1; Cse_sc001285.1_g040.1; Cse_sc001363.1_g020.1; Cse_sc001413.1_g100.1; Cse_sc001552.1_g040.1; Cse_sc001898.1_g010.1; Cse_sc00…
ko00040	Pentose and glucuronate interconversions	56	1674	174	12025	1.51179e-10	4.10344e-09	2.3119	Cse_sc000844.1_g080.1; Cse_sc001121.1_g020.1; Cse_sc001121.1_g030.1; Cse_sc001498.1_g030.1; Cse_sc001596.1_g030.1; Cse_sc001748.1_g160.1; Cse_sc002421.1_g050.1; Cse_sc002577.1_g030.1; Cse_sc002725.1_g020.1; Cse_sc002751.1_g060.1; Cse_sc002813.1_g050.1; Cse_sc003439.1_g050.1; Cse_sc005512.1_g040.1; Cse_sc005918.1_g050.1; Cse_sc006194.1_g030.1; Cse_sc007222.1_g050.1; Cse_sc007437.1_g010.1; Cse_sc00…
ko00196	Photosynthesis - antenna proteins	26	1674	57	12025	1.26261e-09	2.9987e-08	3.27664	Cse_sc000092.1_g080.1; Cse_sc001094.1_g010.1; Cse_sc001362.1_g050.1; Cse_sc002276.1_g040.1; Cse_sc003076.1_g060.1; Cse_sc008237.1_g050.1; Cse_sc010792.1_g040.1; Cse_sc018644.1_g050.1; Cse_sc019544.1_g020.1; Cse_sc020100.1_g020.1; Cse_sc020100.1_g030.1; Cse_sc020955.1_g020.1; Cse_sc021291.1_g020.1; Cse_sc022176.1_g030.1; Cse_sc022707.1_g030.1; Cse_sc023183.1_g020.1; Cse_sc026179.1_g010.1; Cse_sc02…
ko01212	Fatty acid metabolism	64	1674	244	12025	9.26595e-08	1.95614e-06	1.88417	Cse_sc000141.1_g040.1; Cse_sc000174.1_g020.1; Cse_sc000174.1_g050.1; Cse_sc000174.1_g060.1; Cse_sc000420.1_g200.1; Cse_sc000834.1_g090.1; Cse_sc001367.1_g030.1; Cse_sc001614.1_g080.1; Cse_sc001642.1_g080.1; Cse_sc001737.1_g050.1; Cse_sc001934.1_g060.1; Cse_sc002006.1_g110.1; Cse_sc002156.1_g120.1; Cse_sc002257.1_g030.1; Cse_sc002311.1_g040.1; Cse_sc002389.1_g010.1; Cse_sc002389.1_g050.1; Cse_sc00…
ko00380	Tryptophan metabolism	33	1674	101	12025	3.65887e-07	6.95185e-06	2.34705	Cse_sc000197.1_g020.1; Cse_sc000197.1_g040.1; Cse_sc000240.1_g140.1; Cse_sc000420.1_g200.1; Cse_sc000523.1_g080.1; Cse_sc000844.1_g080.1; Cse_sc001482.1_g030.1; Cse_sc001845.1_g010.1; Cse_sc001845.1_g020.1; Cse_sc002813.1_g050.1; Cse_sc003513.1_g010.1; Cse_sc004567.1_g050.1; Cse_sc006039.1_g010.1; Cse_sc006225.1_g030.1; Cse_sc007029.1_g030.1; Cse_sc007222.1_g050.1; Cse_sc007314.1_g020.1; Cse_sc00…
ko01040	Biosynthesis of unsaturated fatty acids	33	1674	106	12025	1.30566e-06	2.25523e-05	2.23634	Cse_sc000174.1_g020.1; Cse_sc000174.1_g050.1; Cse_sc000174.1_g060.1; Cse_sc000834.1_g090.1; Cse_sc001737.1_g050.1; Cse_sc002006.1_g110.1; Cse_sc002690.1_g100.1; Cse_sc003566.1_g010.1; Cse_sc003925.1_g090.1; Cse_sc004888.1_g030.1; Cse_sc005296.1_g020.1; Cse_sc007228.1_g030.1; Cse_sc007276.1_g060.1; Cse_sc007448.1_g030.1; Cse_sc008550.1_g090.1; Cse_sc009590.1_g070.1; Cse_sc010243.1_g020.1; Cse_sc01…
ko00561	Glycerolipid metabolism	38	1674	135	12025	4.20229e-06	6.65363e-05	2.02199	Cse_sc000389.1_g020.1; Cse_sc000844.1_g080.1; Cse_sc000960.1_g030.1; Cse_sc001052.1_g070.1; Cse_sc001146.1_g070.1; Cse_sc001218.1_g020.1; Cse_sc001304.1_g010.1; Cse_sc001385.1_g030.1; Cse_sc002813.1_g050.1; Cse_sc003163.1_g060.1; Cse_sc004643.1_g030.1; Cse_sc005545.1_g040.1; Cse_sc006678.1_g030.1; Cse_sc007222.1_g050.1; Cse_sc007477.1_g020.1; Cse_sc007625.1_g010.1; Cse_sc008323.1_g010.1; Cse_sc00…
ko00941	Flavonoid biosynthesis	33	1674	112	12025	5.205e-06	7.6073e-05	2.11654	Cse_sc000207.1_g020.1; Cse_sc000282.1_g110.1; Cse_sc000460.1_g130.1; Cse_sc001094.1_g030.1; Cse_sc001413.1_g100.1; Cse_sc001801.1_g070.1; Cse_sc001934.1_g050.1; Cse_sc002756.1_g040.1; Cse_sc007092.1_g070.1; Cse_sc007418.1_g020.1; Cse_sc008018.1_g040.1; Cse_sc008113.1_g020.1; Cse_sc008113.1_g050.1; Cse_sc008295.1_g050.1; Cse_sc008695.1_g010.1; Cse_sc008747.1_g090.1; Cse_sc009435.1_g020.1; Cse_sc01…
ko00591	Linoleic acid metabolism	21	1674	61	12025	1.1905e-05	0.000161568	2.47297	Cse_sc000849.1_g050.1; Cse_sc001583.1_g020.1; Cse_sc001600.1_g070.1; Cse_sc001708.1_g010.1; Cse_sc004228.1_g050.1; Cse_sc005622.1_g030.1; Cse_sc005630.1_g010.1; Cse_sc007115.1_g040.1; Cse_sc007115.1_g050.1; Cse_sc008313.1_g010.1; Cse_sc012150.1_g030.1; Cse_sc012896.1_g010.1; Cse_sc020193.1_g020.1; Cse_sc020797.1_g010.1; Cse_sc026804.1_g010.1; Cse_sc029915.1_g040.1; Cse_sc033685.1_g010.1; Cse_sc03…
ko00073	Cutin, suberine and wax biosynthesis	19	1674	55	12025	2.56172e-05	0.000324484	2.48154	Cse_sc000208.1_g100.1; Cse_sc000643.1_g020.1; Cse_sc001274.1_g050.1; Cse_sc001635.1_g050.1; Cse_sc004427.1_g070.1; Cse_sc004614.1_g040.1; Cse_sc005158.1_g030.1; Cse_sc006246.1_g040.1; Cse_sc007167.1_g020.1; Cse_sc008044.1_g030.1; Cse_sc008109.1_g020.1; Cse_sc012616.1_g030.1; Cse_sc012616.1_g050.1; Cse_sc018918.1_g020.1; Cse_sc021937.1_g020.1; Cse_sc026041.1_g020.1; Cse_sc031942.1_g010.1; Cse_sc03…
ko00565	Ether lipid metabolism	23	1674	78	12025	9.67069e-05	0.00114839	2.11818	Cse_sc000395.1_g030.1; Cse_sc001462.1_g040.1; Cse_sc001748.1_g020.1; Cse_sc002368.1_g030.1; Cse_sc002368.1_g090.1; Cse_sc003011.1_g040.1; Cse_sc003438.1_g020.1; Cse_sc005370.1_g020.1; Cse_sc012662.1_g010.1; Cse_sc016134.1_g010.1; Cse_sc016525.1_g020.1; Cse_sc016908.1_g020.1; Cse_sc020797.1_g010.1; Cse_sc021865.1_g030.1; Cse_sc022772.1_g030.1; Cse_sc024226.1_g010.1; Cse_sc024228.1_g010.1; Cse_sc02…
ko00500	Starch and sucrose metabolism	103	1674	527	12025	0.000103255	0.00115402	1.40396	Cse_sc000080.1_g080.1; Cse_sc000183.1_g080.1; Cse_sc000358.1_g080.1; Cse_sc000362.1_g040.1; Cse_sc000650.1_g060.1; Cse_sc001083.1_g050.1; Cse_sc001121.1_g020.1; Cse_sc001121.1_g030.1; Cse_sc001317.1_g020.1; Cse_sc001498.1_g030.1; Cse_sc001596.1_g030.1; Cse_sc001748.1_g160.1; Cse_sc001756.1_g050.1; Cse_sc001983.1_g030.1; Cse_sc002421.1_g050.1; Cse_sc003364.1_g070.1; Cse_sc003411.1_g030.1; Cse_sc00…
ko00052	Galactose metabolism	32	1674	123	12025	0.000112722	0.00118984	1.86885	Cse_sc000465.1_g100.1; Cse_sc000650.1_g060.1; Cse_sc000689.1_g080.1; Cse_sc001983.1_g030.1; Cse_sc003450.1_g040.1; Cse_sc004144.1_g060.1; Cse_sc005621.1_g030.1; Cse_sc006405.1_g030.1; Cse_sc009352.1_g050.1; Cse_sc009525.1_g010.1; Cse_sc010925.1_g030.1; Cse_sc011626.1_g040.1; Cse_sc012103.1_g020.1; Cse_sc012414.1_g020.1; Cse_sc012813.1_g010.1; Cse_sc013108.1_g040.1; Cse_sc015732.1_g020.1; Cse_sc01…
ko00908	Zeatin biosynthesis	14	1674	41	12025	0.000239969	0.00237534	2.45287	Cse_sc002022.1_g030.1; Cse_sc002277.1_g010.1; Cse_sc002742.1_g060.1; Cse_sc002742.1_g080.1; Cse_sc008490.1_g060.1; Cse_sc009755.1_g010.1; Cse_sc010248.1_g020.1; Cse_sc011286.1_g010.1; Cse_sc015414.1_g020.1; Cse_sc023112.1_g010.1; Cse_sc023349.1_g010.1; Cse_sc025196.1_g010.1; Cse_sc029362.1_g020.1; Cse_sc054657.1_g010.1
ko00903	Limonene and pinene degradation	10	1674	25	12025	0.000250036	0.00237534	2.87336	Cse_sc000844.1_g080.1; Cse_sc002813.1_g050.1; Cse_sc007222.1_g050.1; Cse_sc015187.1_g010.1; Cse_sc015187.1_g020.1; Cse_sc021254.1_g010.1; Cse_sc023683.1_g010.1; Cse_sc026781.1_g010.1; Cse_sc042098.1_g030.1; Cse_sc106281.1_g010.1
ko02024	Quorum sensing	31	1674	123	12025	0.000262859	0.00237824	1.81045	Cse_sc001367.1_g030.1; Cse_sc001642.1_g080.1; Cse_sc002577.1_g030.1; Cse_sc002725.1_g020.1; Cse_sc002748.1_g090.1; Cse_sc002751.1_g060.1; Cse_sc003085.1_g050.1; Cse_sc003720.1_g030.1; Cse_sc006249.1_g040.1; Cse_sc010178.1_g010.1; Cse_sc010622.1_g030.1; Cse_sc011307.1_g040.1; Cse_sc011823.1_g020.1; Cse_sc013565.1_g070.1; Cse_sc014261.1_g020.1; Cse_sc015652.1_g020.1; Cse_sc016245.1_g030.1; Cse_sc02…
ko00564	Glycerophospholipid metabolism	46	1674	207	12025	0.000385346	0.00332799	1.59631	Cse_sc000172.1_g050.1; Cse_sc000389.1_g020.1; Cse_sc000395.1_g030.1; Cse_sc001146.1_g070.1; Cse_sc001304.1_g010.1; Cse_sc001385.1_g030.1; Cse_sc001462.1_g040.1; Cse_sc001748.1_g020.1; Cse_sc002368.1_g030.1; Cse_sc002368.1_g090.1; Cse_sc003011.1_g040.1; Cse_sc003438.1_g020.1; Cse_sc004643.1_g030.1; Cse_sc005370.1_g020.1; Cse_sc006629.1_g040.1; Cse_sc006678.1_g030.1; Cse_sc007477.1_g020.1; Cse_sc00…
ko00627	Aminobenzoate degradation	5	1674	9	12025	0.000415364	0.00343127	3.99077	Cse_sc005100.1_g040.1; Cse_sc018446.1_g010.1; Cse_sc018446.1_g020.1; Cse_sc023683.1_g010.1; Cse_sc106281.1_g010.1
ko00061	Fatty acid biosynthesis	31	1674	129	12025	0.00065202	0.00516182	1.72624	Cse_sc000141.1_g040.1; Cse_sc001367.1_g030.1; Cse_sc001614.1_g080.1; Cse_sc001642.1_g080.1; Cse_sc001934.1_g060.1; Cse_sc002156.1_g120.1; Cse_sc002257.1_g030.1; Cse_sc002311.1_g040.1; Cse_sc002389.1_g010.1; Cse_sc002389.1_g050.1; Cse_sc003085.1_g050.1; Cse_sc003577.1_g060.1; Cse_sc003583.1_g060.1; Cse_sc003925.1_g090.1; Cse_sc004571.1_g020.1; Cse_sc004762.1_g010.1; Cse_sc007834.1_g010.1; Cse_sc00…
ko00905	Brassinosteroid biosynthesis	6	1674	13	12025	0.000794912	0.00604133	3.31541	Cse_sc000091.1_g010.1; Cse_sc001235.1_g010.1; Cse_sc001820.1_g080.1; Cse_sc012043.1_g010.1; Cse_sc012710.1_g050.1; Cse_sc025826.1_g020.1
ko00410	beta-Alanine metabolism	23	1674	89	12025	0.000854284	0.00624284	1.85638	Cse_sc000133.1_g050.1; Cse_sc000844.1_g080.1; Cse_sc001494.1_g030.1; Cse_sc001621.1_g070.1; Cse_sc002813.1_g050.1; Cse_sc003569.1_g060.1; Cse_sc003845.1_g020.1; Cse_sc006206.1_g020.1; Cse_sc007222.1_g050.1; Cse_sc010876.1_g010.1; Cse_sc015187.1_g010.1; Cse_sc015187.1_g020.1; Cse_sc017166.1_g030.1; Cse_sc018695.1_g020.1; Cse_sc019442.1_g040.1; Cse_sc020155.1_g010.1; Cse_sc020364.1_g010.1; Cse_sc02…
ko00770	Pantothenate and CoA biosynthesis	14	1674	47	12025	0.00125809	0.00885322	2.13973	Cse_sc001621.1_g070.1; Cse_sc005778.1_g030.1; Cse_sc006206.1_g020.1; Cse_sc008140.1_g030.1; Cse_sc012830.1_g010.1; Cse_sc012994.1_g030.1; Cse_sc013681.1_g020.1; Cse_sc014111.1_g050.1; Cse_sc019442.1_g040.1; Cse_sc020451.1_g020.1; Cse_sc045792.1_g010.1; Cse_sc045909.1_g010.1; Cse_sc058821.1_g010.1; Cse_sc061066.1_g020.1
ko00950	Isoquinoline alkaloid biosynthesis	17	1674	64	12025	0.00219238	0.0148768	1.90809	Cse_sc000133.1_g050.1; Cse_sc000820.1_g060.1; Cse_sc000889.1_g020.1; Cse_sc003099.1_g010.1; Cse_sc003230.1_g030.1; Cse_sc003845.1_g020.1; Cse_sc006323.1_g010.1; Cse_sc006563.1_g030.1; Cse_sc008903.1_g020.1; Cse_sc009326.1_g050.1; Cse_sc010460.1_g030.1; Cse_sc018132.1_g010.1; Cse_sc027024.1_g020.1; Cse_sc027584.1_g010.1; Cse_sc030429.1_g010.1; Cse_sc034207.1_g020.1; Cse_sc057471.1_g010.1
ko00360	Phenylalanine metabolism	21	1674	85	12025	0.00243734	0.0159688	1.77472	Cse_sc000012.1_g140.1; Cse_sc000133.1_g050.1; Cse_sc002207.1_g080.1; Cse_sc003230.1_g030.1; Cse_sc003492.1_g050.1; Cse_sc003845.1_g020.1; Cse_sc005747.1_g070.1; Cse_sc006323.1_g010.1; Cse_sc007418.1_g020.1; Cse_sc008903.1_g020.1; Cse_sc013241.1_g010.1; Cse_sc015783.1_g040.1; Cse_sc018446.1_g010.1; Cse_sc018446.1_g020.1; Cse_sc019952.1_g020.1; Cse_sc020225.1_g010.1; Cse_sc027823.1_g010.1; Cse_sc03…
ko00910	Nitrogen metabolism	18	1674	71	12025	0.00312314	0.0194162	1.82114	Cse_sc000738.1_g040.1; Cse_sc001805.1_g010.1; Cse_sc001805.1_g050.1; Cse_sc002327.1_g070.1; Cse_sc003348.1_g040.1; Cse_sc004009.1_g050.1; Cse_sc004569.1_g080.1; Cse_sc005657.1_g020.1; Cse_sc006024.1_g020.1; Cse_sc006924.1_g020.1; Cse_sc010286.1_g070.1; Cse_sc012742.1_g010.1; Cse_sc014030.1_g020.1; Cse_sc019091.1_g010.1; Cse_sc020466.1_g010.1; Cse_sc028390.1_g010.1; Cse_sc037579.1_g010.1; Cse_sc04…
ko00350	Tyrosine metabolism	27	1674	119	12025	0.00316791	0.0194162	1.62985	Cse_sc000042.1_g060.1; Cse_sc000133.1_g050.1; Cse_sc000820.1_g060.1; Cse_sc000889.1_g020.1; Cse_sc002207.1_g080.1; Cse_sc003099.1_g010.1; Cse_sc003120.1_g020.1; Cse_sc003230.1_g030.1; Cse_sc003740.1_g020.1; Cse_sc003845.1_g020.1; Cse_sc006323.1_g010.1; Cse_sc006563.1_g030.1; Cse_sc007061.1_g040.1; Cse_sc008903.1_g020.1; Cse_sc009326.1_g050.1; Cse_sc010460.1_g030.1; Cse_sc013846.1_g050.1; Cse_sc01…
ko04014	Ras signaling pathway	28	1674	125	12025	0.00336775	0.019996	1.60908	Cse_sc000395.1_g030.1; Cse_sc001462.1_g040.1; Cse_sc001924.1_g020.1; Cse_sc002368.1_g030.1; Cse_sc002368.1_g090.1; Cse_sc003011.1_g040.1; Cse_sc003438.1_g020.1; Cse_sc004259.1_g010.1; Cse_sc005370.1_g020.1; Cse_sc005960.1_g030.1; Cse_sc008289.1_g050.1; Cse_sc008926.1_g050.1; Cse_sc012662.1_g010.1; Cse_sc015616.1_g020.1; Cse_sc016134.1_g010.1; Cse_sc016525.1_g020.1; Cse_sc016908.1_g020.1; Cse_sc01…
ko00290	Valine, leucine and isoleucine biosynthesis	13	1674	47	12025	0.00371172	0.0213705	1.9869	Cse_sc001677.1_g030.1; Cse_sc005743.1_g020.1; Cse_sc005778.1_g030.1; Cse_sc006517.1_g020.1; Cse_sc006857.1_g010.1; Cse_sc008140.1_g030.1; Cse_sc012830.1_g010.1; Cse_sc013681.1_g020.1; Cse_sc014111.1_g050.1; Cse_sc023912.1_g010.1; Cse_sc045792.1_g010.1; Cse_sc058821.1_g010.1; Cse_sc061066.1_g020.1
ko00904	Diterpenoid biosynthesis	16	1674	62	12025	0.00384088	0.0214638	1.85378	Cse_sc002467.1_g050.1; Cse_sc003687.1_g050.1; Cse_sc005033.1_g020.1; Cse_sc005323.1_g040.1; Cse_sc006089.1_g020.1; Cse_sc008319.1_g020.1; Cse_sc009943.1_g040.1; Cse_sc010048.1_g030.1; Cse_sc011052.1_g010.1; Cse_sc014004.1_g010.1; Cse_sc014122.1_g040.1; Cse_sc014401.1_g020.1; Cse_sc017354.1_g020.1; Cse_sc028346.1_g050.1; Cse_sc032302.1_g010.1; Cse_sc057168.1_g010.1
ko00603	Glycosphingolipid biosynthesis - globo series	4	1674	9	12025	0.00401919	0.0218184	3.19262	Cse_sc000389.1_g040.1; Cse_sc005988.1_g050.1; Cse_sc009352.1_g050.1; Cse_sc016815.1_g030.1
ko04015	Rap1 signaling pathway	12	1674	43	12025	0.00442318	0.0233446	2.00467	Cse_sc000009.1_g090.1; Cse_sc004259.1_g010.1; Cse_sc005960.1_g030.1; Cse_sc008289.1_g050.1; Cse_sc008926.1_g050.1; Cse_sc014479.1_g020.1; Cse_sc019827.1_g020.1; Cse_sc021295.1_g040.1; Cse_sc021514.1_g020.1; Cse_sc024916.1_g010.1; Cse_sc029823.1_g010.1; Cse_sc050270.1_g010.1
ko00780	Biotin metabolism	14	1674	53	12025	0.00465122	0.0238846	1.8975	Cse_sc000141.1_g040.1; Cse_sc001614.1_g080.1; Cse_sc001934.1_g060.1; Cse_sc002156.1_g120.1; Cse_sc002389.1_g010.1; Cse_sc002389.1_g050.1; Cse_sc003577.1_g060.1; Cse_sc003925.1_g090.1; Cse_sc004571.1_g020.1; Cse_sc014602.1_g030.1; Cse_sc014627.1_g020.1; Cse_sc018227.1_g030.1; Cse_sc035570.1_g010.1; Cse_sc036675.1_g010.1
ko00053	Ascorbate and aldarate metabolism	21	1674	90	12025	0.0051662	0.0252617	1.67613	Cse_sc000005.1_g160.1; Cse_sc000844.1_g080.1; Cse_sc001351.1_g030.1; Cse_sc002813.1_g050.1; Cse_sc006385.1_g020.1; Cse_sc007222.1_g050.1; Cse_sc007770.1_g020.1; Cse_sc010925.1_g030.1; Cse_sc011269.1_g040.1; Cse_sc012354.1_g040.1; Cse_sc013625.1_g020.1; Cse_sc015187.1_g010.1; Cse_sc015187.1_g020.1; Cse_sc017802.1_g030.1; Cse_sc021254.1_g010.1; Cse_sc025931.1_g010.1; Cse_sc026781.1_g010.1; Cse_sc03…
ko04072	Phospholipase D signaling pathway	27	1674	123	12025	0.00518529	0.0252617	1.57684	Cse_sc000395.1_g030.1; Cse_sc001146.1_g070.1; Cse_sc001462.1_g040.1; Cse_sc002368.1_g030.1; Cse_sc002368.1_g090.1; Cse_sc003011.1_g040.1; Cse_sc003438.1_g020.1; Cse_sc004926.1_g060.1; Cse_sc005370.1_g020.1; Cse_sc006612.1_g010.1; Cse_sc006653.1_g050.1; Cse_sc006678.1_g030.1; Cse_sc008848.1_g010.1; Cse_sc008926.1_g050.1; Cse_sc012662.1_g010.1; Cse_sc016134.1_g010.1; Cse_sc016525.1_g020.1; Cse_sc01…
ko04071	Sphingolipid signaling pathway	32	1674	152	12025	0.00557387	0.0264759	1.51229	Cse_sc000395.1_g030.1; Cse_sc000677.1_g030.1; Cse_sc000700.1_g110.1; Cse_sc001462.1_g040.1; Cse_sc001880.1_g070.1; Cse_sc002368.1_g030.1; Cse_sc002368.1_g090.1; Cse_sc003011.1_g040.1; Cse_sc003438.1_g020.1; Cse_sc004259.1_g010.1; Cse_sc005370.1_g020.1; Cse_sc005960.1_g030.1; Cse_sc006014.1_g030.1; Cse_sc008926.1_g050.1; Cse_sc012662.1_g010.1; Cse_sc012827.1_g010.1; Cse_sc016134.1_g010.1; Cse_sc01…
ko00625	Chloroalkane and chloroalkene degradation	11	1674	40	12025	0.00657406	0.0304651	1.97543	Cse_sc000042.1_g060.1; Cse_sc000844.1_g080.1; Cse_sc002813.1_g050.1; Cse_sc007061.1_g040.1; Cse_sc007222.1_g050.1; Cse_sc015187.1_g010.1; Cse_sc015187.1_g020.1; Cse_sc021254.1_g010.1; Cse_sc026781.1_g010.1; Cse_sc026932.1_g010.1; Cse_sc042098.1_g030.1
ko00330	Arginine and proline metabolism	23	1674	103	12025	0.00682403	0.0308706	1.60406	Cse_sc000439.1_g080.1; Cse_sc000844.1_g080.1; Cse_sc001494.1_g030.1; Cse_sc002078.1_g070.1; Cse_sc002374.1_g050.1; Cse_sc002420.1_g070.1; Cse_sc002813.1_g050.1; Cse_sc006667.1_g030.1; Cse_sc007222.1_g050.1; Cse_sc009252.1_g030.1; Cse_sc010876.1_g010.1; Cse_sc015187.1_g010.1; Cse_sc015187.1_g020.1; Cse_sc018446.1_g010.1; Cse_sc018446.1_g020.1; Cse_sc019782.1_g020.1; Cse_sc021254.1_g010.1; Cse_sc02…
ko00514	Other types of O-glycan biosynthesis	3	1674	7	12025	0.00922051	0.0407418	3.0786	Cse_sc000799.1_g010.1; Cse_sc019022.1_g010.1; Cse_sc021561.1_g020.1
ko00945	Stilbenoid, diarylheptanoid and gingerol biosynthesis	19	1674	84	12025	0.010068	0.0434755	1.62482	Cse_sc000282.1_g110.1; Cse_sc000460.1_g130.1; Cse_sc001094.1_g030.1; Cse_sc001413.1_g100.1; Cse_sc001934.1_g050.1; Cse_sc002756.1_g040.1; Cse_sc007418.1_g020.1; Cse_sc008113.1_g020.1; Cse_sc008113.1_g050.1; Cse_sc008747.1_g090.1; Cse_sc011212.1_g020.1; Cse_sc012035.1_g040.1; Cse_sc015382.1_g010.1; Cse_sc019952.1_g020.1; Cse_sc023683.1_g010.1; Cse_sc034153.1_g030.1; Cse_sc047493.1_g010.1; Cse_sc10…
ko00100	Steroid biosynthesis	16	1674	70	12025	0.0138648	0.0579039	1.64192	Cse_sc001230.1_g070.1; Cse_sc001230.1_g080.1; Cse_sc001700.1_g050.1; Cse_sc001748.1_g090.1; Cse_sc003187.1_g030.1; Cse_sc003378.1_g060.1; Cse_sc008164.1_g030.1; Cse_sc008184.1_g050.1; Cse_sc009051.1_g040.1; Cse_sc012197.1_g010.1; Cse_sc012645.1_g050.1; Cse_sc013205.1_g020.1; Cse_sc020797.1_g010.1; Cse_sc026804.1_g010.1; Cse_sc035085.1_g010.1; Cse_sc036121.1_g020.1
ko04024	cAMP signaling pathway	28	1674	138	12025	0.0140188	0.0579039	1.4575	Cse_sc000395.1_g030.1; Cse_sc001462.1_g040.1; Cse_sc002368.1_g030.1; Cse_sc002368.1_g090.1; Cse_sc003011.1_g040.1; Cse_sc003438.1_g020.1; Cse_sc004259.1_g010.1; Cse_sc005370.1_g020.1; Cse_sc005960.1_g030.1; Cse_sc007448.1_g030.1; Cse_sc008289.1_g050.1; Cse_sc008926.1_g050.1; Cse_sc009590.1_g070.1; Cse_sc012662.1_g010.1; Cse_sc016134.1_g010.1; Cse_sc016525.1_g020.1; Cse_sc016908.1_g020.1; Cse_sc01…
ko00261	Monobactam biosynthesis	5	1674	16	12025	0.0165923	0.0670753	2.24481	Cse_sc005123.1_g020.1; Cse_sc015030.1_g010.1; Cse_sc032334.1_g010.1; Cse_sc039320.1_g010.1; Cse_sc045278.1_g010.1
ko00906	Carotenoid biosynthesis	17	1674	77	12025	0.0170404	0.0674515	1.58594	Cse_sc000092.1_g120.1; Cse_sc001326.1_g060.1; Cse_sc001418.1_g070.1; Cse_sc002663.1_g070.1; Cse_sc002816.1_g010.1; Cse_sc007661.1_g020.1; Cse_sc008178.1_g070.1; Cse_sc009551.1_g010.1; Cse_sc015189.1_g010.1; Cse_sc020783.1_g020.1; Cse_sc024878.1_g020.1; Cse_sc030200.1_g010.1; Cse_sc036080.1_g030.1; Cse_sc037641.1_g010.1; Cse_sc040897.1_g010.1; Cse_sc041836.1_g010.1; Cse_sc081552.1_g010.1
ko00592	alpha-Linolenic acid metabolism	30	1674	155	12025	0.0223184	0.0865408	1.39033	Cse_sc000849.1_g050.1; Cse_sc001600.1_g070.1; Cse_sc001708.1_g010.1; Cse_sc001987.1_g080.1; Cse_sc003120.1_g020.1; Cse_sc003740.1_g020.1; Cse_sc005622.1_g030.1; Cse_sc005630.1_g010.1; Cse_sc006615.1_g020.1; Cse_sc007115.1_g040.1; Cse_sc007115.1_g050.1; Cse_sc007448.1_g030.1; Cse_sc008313.1_g010.1; Cse_sc009590.1_g070.1; Cse_sc009857.1_g040.1; Cse_sc012896.1_g010.1; Cse_sc013846.1_g050.1; Cse_sc01…
ko00982	Drug metabolism - cytochrome P450	21	1674	103	12025	0.0249332	0.0913413	1.46458	Cse_sc000042.1_g060.1; Cse_sc000172.1_g080.1; Cse_sc000461.1_g040.1; Cse_sc002809.1_g060.1; Cse_sc003394.1_g030.1; Cse_sc004151.1_g020.1; Cse_sc005477.1_g010.1; Cse_sc006882.1_g040.1; Cse_sc007061.1_g040.1; Cse_sc009061.1_g030.1; Cse_sc009423.1_g040.1; Cse_sc010077.1_g020.1; Cse_sc010661.1_g040.1; Cse_sc014155.1_g010.1; Cse_sc014225.1_g010.1; Cse_sc020395.1_g020.1; Cse_sc023455.1_g020.1; Cse_sc02…
ko00590	Arachidonic acid metabolism	13	1674	58	12025	0.0254189	0.0913413	1.61007	Cse_sc000487.1_g040.1; Cse_sc001853.1_g020.1; Cse_sc003421.1_g030.1; Cse_sc005906.1_g050.1; Cse_sc008623.1_g050.1; Cse_sc015433.1_g030.1; Cse_sc020177.1_g020.1; Cse_sc020797.1_g010.1; Cse_sc026804.1_g010.1; Cse_sc029819.1_g010.1; Cse_sc051522.1_g010.1; Cse_sc062855.1_g010.1; Cse_sc063774.1_g010.1
ko00520	Amino sugar and nucleotide sugar metabolism	49	1674	274	12025	0.0254819	0.0913413	1.28462	Cse_sc000080.1_g080.1; Cse_sc000183.1_g080.1; Cse_sc000358.1_g080.1; Cse_sc000505.1_g030.1; Cse_sc002466.1_g010.1; Cse_sc002862.1_g060.1; Cse_sc003444.1_g060.1; Cse_sc003766.1_g010.1; Cse_sc003843.1_g040.1; Cse_sc004040.1_g020.1; Cse_sc004362.1_g020.1; Cse_sc004368.1_g030.1; Cse_sc004522.1_g050.1; Cse_sc005205.1_g020.1; Cse_sc006131.1_g060.1; Cse_sc006523.1_g030.1; Cse_sc009298.1_g040.1; Cse_sc00…
ko00130	Ubiquinone and other terpenoid-quinone biosynthesis	18	1674	86	12025	0.0256556	0.0913413	1.5035	Cse_sc001487.1_g030.1; Cse_sc002207.1_g080.1; Cse_sc002294.1_g050.1; Cse_sc003230.1_g030.1; Cse_sc005747.1_g070.1; Cse_sc006323.1_g010.1; Cse_sc008903.1_g020.1; Cse_sc013241.1_g010.1; Cse_sc015783.1_g040.1; Cse_sc020225.1_g010.1; Cse_sc020250.1_g030.1; Cse_sc021065.1_g030.1; Cse_sc027823.1_g010.1; Cse_sc030981.1_g010.1; Cse_sc043257.1_g010.1; Cse_sc045596.1_g010.1; Cse_sc241107.1_g010.1; Cse_sc24…
ko04011	MAPK signaling pathway - yeast	24	1674	121	12025	0.0260209	0.0913413	1.42481	Cse_sc000699.1_g050.1; Cse_sc001105.1_g050.1; Cse_sc001929.1_g020.1; Cse_sc004926.1_g060.1; Cse_sc006612.1_g010.1; Cse_sc006629.1_g040.1; Cse_sc007314.1_g020.1; Cse_sc008091.1_g010.1; Cse_sc008848.1_g010.1; Cse_sc008926.1_g050.1; Cse_sc010949.1_g010.1; Cse_sc011307.1_g020.1; Cse_sc013681.1_g010.1; Cse_sc014953.1_g020.1; Cse_sc015616.1_g020.1; Cse_sc018000.1_g050.1; Cse_sc018832.1_g020.1; Cse_sc01…
ko00860	Porphyrin and chlorophyll metabolism	19	1674	92	12025	0.0264409	0.0913413	1.48353	Cse_sc000081.1_g030.1; Cse_sc000681.1_g060.1; Cse_sc001071.1_g030.1; Cse_sc001988.1_g010.1; Cse_sc002138.1_g020.1; Cse_sc002144.1_g040.1; Cse_sc004138.1_g060.1; Cse_sc004179.1_g060.1; Cse_sc004388.1_g010.1; Cse_sc006199.1_g020.1; Cse_sc008447.1_g010.1; Cse_sc013674.1_g010.1; Cse_sc014259.1_g020.1; Cse_sc014628.1_g020.1; Cse_sc018423.1_g020.1; Cse_sc027671.1_g010.1; Cse_sc028235.1_g010.1; Cse_sc03…
ko00030	Pentose phosphate pathway	22	1674	111	12025	0.030841	0.103264	1.42374	Cse_sc000132.1_g120.1; Cse_sc000266.1_g050.1; Cse_sc001499.1_g040.1; Cse_sc001499.1_g080.1; Cse_sc002174.1_g010.1; Cse_sc002485.1_g010.1; Cse_sc005621.1_g030.1; Cse_sc008628.1_g030.1; Cse_sc008628.1_g040.1; Cse_sc009002.1_g060.1; Cse_sc011714.1_g030.1; Cse_sc014388.1_g010.1; Cse_sc015732.1_g020.1; Cse_sc016876.1_g020.1; Cse_sc019790.1_g030.1; Cse_sc021000.1_g010.1; Cse_sc022348.1_g010.1; Cse_sc02…
ko04075	Plant hormone signal transduction	104	1674	635	12025	0.0309791	0.103264	1.17649	Cse_sc000074.1_g100.1; Cse_sc000076.1_g130.1; Cse_sc000082.1_g120.1; Cse_sc000098.1_g130.1; Cse_sc000244.1_g100.1; Cse_sc000245.1_g020.1; Cse_sc000291.1_g090.1; Cse_sc000365.1_g010.1; Cse_sc000403.1_g120.1; Cse_sc000637.1_g030.1; Cse_sc000641.1_g030.1; Cse_sc000758.1_g040.1; Cse_sc000886.1_g010.1; Cse_sc001287.1_g110.1; Cse_sc001582.1_g030.1; Cse_sc001690.1_g070.1; Cse_sc001758.1_g090.1; Cse_sc00…
ko00140	Steroid hormone biosynthesis	8	1674	33	12025	0.0323912	0.104311	1.74143	Cse_sc000240.1_g140.1; Cse_sc001694.1_g010.1; Cse_sc003566.1_g010.1; Cse_sc004567.1_g050.1; Cse_sc006225.1_g030.1; Cse_sc010895.1_g010.1; Cse_sc047023.1_g010.1; Cse_sc047617.1_g010.1
ko00300	Lysine biosynthesis	8	1674	33	12025	0.0323912	0.104311	1.74143	Cse_sc005648.1_g050.1; Cse_sc007850.1_g020.1; Cse_sc013249.1_g010.1; Cse_sc015030.1_g010.1; Cse_sc032334.1_g010.1; Cse_sc039320.1_g010.1; Cse_sc045278.1_g010.1; Cse_sc052739.1_g010.1
ko00740	Riboflavin metabolism	4	1674	14	12025	0.0350669	0.111045	2.0524	Cse_sc002966.1_g010.1; Cse_sc007492.1_g020.1; Cse_sc010886.1_g040.1; Cse_sc022021.1_g040.1
ko00562	Inositol phosphate metabolism	19	1674	95	12025	0.0361505	0.1126	1.43668	Cse_sc000005.1_g160.1; Cse_sc001186.1_g070.1; Cse_sc001351.1_g030.1; Cse_sc001384.1_g180.1; Cse_sc001929.1_g020.1; Cse_sc004926.1_g060.1; Cse_sc005471.1_g130.1; Cse_sc006612.1_g010.1; Cse_sc008141.1_g060.1; Cse_sc008848.1_g010.1; Cse_sc018695.1_g020.1; Cse_sc018832.1_g020.1; Cse_sc024228.1_g010.1; Cse_sc030387.1_g020.1; Cse_sc031249.1_g020.1; Cse_sc032042.1_g010.1; Cse_sc040326.1_g010.1; Cse_sc05…
ko00071	Fatty acid degradation	24	1674	125	12025	0.0372521	0.11416	1.37921	Cse_sc000042.1_g060.1; Cse_sc000420.1_g200.1; Cse_sc000844.1_g080.1; Cse_sc001367.1_g030.1; Cse_sc001642.1_g080.1; Cse_sc002813.1_g050.1; Cse_sc003085.1_g050.1; Cse_sc003120.1_g020.1; Cse_sc003513.1_g010.1; Cse_sc003740.1_g020.1; Cse_sc007061.1_g040.1; Cse_sc007222.1_g050.1; Cse_sc007448.1_g030.1; Cse_sc009590.1_g070.1; Cse_sc013846.1_g050.1; Cse_sc015187.1_g010.1; Cse_sc015187.1_g020.1; Cse_sc01…
ko00531	Glycosaminoglycan degradation	8	1674	34	12025	0.0387932	0.115262	1.69021	Cse_sc000959.1_g020.1; Cse_sc001609.1_g020.1; Cse_sc002644.1_g080.1; Cse_sc008560.1_g060.1; Cse_sc011909.1_g040.1; Cse_sc013183.1_g030.1; Cse_sc016407.1_g010.1; Cse_sc074774.1_g010.1
ko04080	Neuroactive ligand-receptor interaction	2	1674	6	12025	0.038825	0.115262	2.39446	Cse_sc022631.1_g040.1; Cse_sc050270.1_g010.1
ko00750	Vitamin B6 metabolism	4	1674	15	12025	0.0467368	0.136615	1.91557	Cse_sc000498.1_g020.1; Cse_sc001317.1_g070.1; Cse_sc003925.1_g070.1; Cse_sc008379.1_g070.1
ko04140	Regulation of autophagy	13	1674	64	12025	0.0544069	0.156626	1.45913	Cse_sc000082.1_g020.1; Cse_sc000839.1_g070.1; Cse_sc001598.1_g020.1; Cse_sc004105.1_g030.1; Cse_sc006690.1_g030.1; Cse_sc008642.1_g020.1; Cse_sc009201.1_g020.1; Cse_sc014358.1_g010.1; Cse_sc025259.1_g020.1; Cse_sc026485.1_g010.1; Cse_sc036625.1_g010.1; Cse_sc040326.1_g010.1; Cse_sc045750.1_g010.1
ko00340	Histidine metabolism	10	1674	48	12025	0.06204	0.175072	1.49654	Cse_sc000844.1_g080.1; Cse_sc001351.1_g030.1; Cse_sc002813.1_g050.1; Cse_sc007222.1_g050.1; Cse_sc015187.1_g010.1; Cse_sc015187.1_g020.1; Cse_sc021254.1_g010.1; Cse_sc026781.1_g010.1; Cse_sc035657.1_g010.1; Cse_sc042098.1_g030.1
ko00310	Lysine degradation	15	1674	77	12025	0.0626572	0.175072	1.39936	Cse_sc000420.1_g200.1; Cse_sc000844.1_g080.1; Cse_sc001888.1_g060.1; Cse_sc002813.1_g050.1; Cse_sc003513.1_g010.1; Cse_sc003573.1_g040.1; Cse_sc007222.1_g050.1; Cse_sc008424.1_g020.1; Cse_sc015187.1_g010.1; Cse_sc015187.1_g020.1; Cse_sc021254.1_g010.1; Cse_sc026710.1_g010.1; Cse_sc026781.1_g010.1; Cse_sc032562.1_g010.1; Cse_sc042098.1_g030.1
ko00430	Taurine and hypotaurine metabolism	9	1674	43	12025	0.0672433	0.184281	1.5035	Cse_sc001853.1_g020.1; Cse_sc003421.1_g030.1; Cse_sc005906.1_g050.1; Cse_sc010252.1_g020.1; Cse_sc017200.1_g020.1; Cse_sc029819.1_g010.1; Cse_sc044029.1_g010.1; Cse_sc062855.1_g010.1; Cse_sc063774.1_g010.1
ko00980	Metabolism of xenobiotics by cytochrome P450	20	1674	108	12025	0.0680643	0.184281	1.33026	Cse_sc000042.1_g060.1; Cse_sc000172.1_g080.1; Cse_sc000240.1_g140.1; Cse_sc000461.1_g040.1; Cse_sc002809.1_g060.1; Cse_sc003394.1_g030.1; Cse_sc004151.1_g020.1; Cse_sc004567.1_g050.1; Cse_sc005477.1_g010.1; Cse_sc006225.1_g030.1; Cse_sc007061.1_g040.1; Cse_sc009423.1_g040.1; Cse_sc010895.1_g010.1; Cse_sc014225.1_g010.1; Cse_sc020395.1_g020.1; Cse_sc023455.1_g020.1; Cse_sc026932.1_g010.1; Cse_sc02…
ko04068	FoxO signaling pathway	25	1674	139	12025	0.068863	0.184281	1.29198	Cse_sc000082.1_g020.1; Cse_sc000498.1_g070.1; Cse_sc000602.1_g080.1; Cse_sc000839.1_g070.1; Cse_sc002213.1_g060.1; Cse_sc004105.1_g030.1; Cse_sc004144.1_g010.1; Cse_sc006690.1_g030.1; Cse_sc007314.1_g020.1; Cse_sc008642.1_g020.1; Cse_sc008926.1_g050.1; Cse_sc009201.1_g020.1; Cse_sc009402.1_g020.1; Cse_sc010949.1_g010.1; Cse_sc014358.1_g010.1; Cse_sc014953.1_g020.1; Cse_sc018000.1_g050.1; Cse_sc01…
ko00966	Glucosinolate biosynthesis	6	1674	27	12025	0.0713717	0.18775	1.59631	Cse_sc001845.1_g010.1; Cse_sc001845.1_g020.1; Cse_sc001993.1_g010.1; Cse_sc003292.1_g050.1; Cse_sc010548.1_g010.1; Cse_sc018840.1_g020.1
ko00983	Drug metabolism - other enzymes	8	1674	38	12025	0.0727492	0.18775	1.51229	Cse_sc001076.1_g110.1; Cse_sc006206.1_g020.1; Cse_sc007015.1_g020.1; Cse_sc009585.1_g030.1; Cse_sc011028.1_g020.1; Cse_sc014477.1_g030.1; Cse_sc019442.1_g040.1; Cse_sc020451.1_g020.1
ko00401	Novobiocin biosynthesis	3	1674	12	12025	0.0735931	0.18775	1.79585	Cse_sc003230.1_g030.1; Cse_sc006323.1_g010.1; Cse_sc008903.1_g020.1
ko04810	Regulation of actin cytoskeleton	19	1674	103	12025	0.0744743	0.18775	1.32509	Cse_sc000009.1_g090.1; Cse_sc001186.1_g070.1; Cse_sc001384.1_g180.1; Cse_sc003160.1_g040.1; Cse_sc003896.1_g060.1; Cse_sc004259.1_g010.1; Cse_sc004926.1_g060.1; Cse_sc005960.1_g030.1; Cse_sc006612.1_g010.1; Cse_sc008848.1_g010.1; Cse_sc008926.1_g050.1; Cse_sc014479.1_g020.1; Cse_sc018832.1_g020.1; Cse_sc019827.1_g020.1; Cse_sc021514.1_g020.1; Cse_sc029823.1_g010.1; Cse_sc030739.1_g010.1; Cse_sc05…
ko00051	Fructose and mannose metabolism	24	1674	134	12025	0.0751001	0.18775	1.28658	Cse_sc003021.1_g090.1; Cse_sc004514.1_g040.1; Cse_sc005621.1_g030.1; Cse_sc005814.1_g070.1; Cse_sc007082.1_g040.1; Cse_sc008368.1_g020.1; Cse_sc009002.1_g060.1; Cse_sc009008.1_g010.1; Cse_sc009380.1_g070.1; Cse_sc012103.1_g020.1; Cse_sc014299.1_g040.1; Cse_sc014388.1_g010.1; Cse_sc014932.1_g020.1; Cse_sc015732.1_g020.1; Cse_sc015981.1_g010.1; Cse_sc019596.1_g010.1; Cse_sc021000.1_g010.1; Cse_sc02…
ko00920	Sulfur metabolism	11	1674	56	12025	0.0812468	0.200479	1.41102	Cse_sc000696.1_g030.1; Cse_sc003849.1_g020.1; Cse_sc005123.1_g020.1; Cse_sc010309.1_g020.1; Cse_sc011679.1_g010.1; Cse_sc012920.1_g040.1; Cse_sc019703.1_g030.1; Cse_sc021684.1_g030.1; Cse_sc025183.1_g020.1; Cse_sc026476.1_g020.1; Cse_sc029645.1_g020.1
ko04370	VEGF signaling pathway	8	1674	39	12025	0.0834263	0.203218	1.47352	Cse_sc000224.1_g010.1; Cse_sc004259.1_g010.1; Cse_sc005960.1_g030.1; Cse_sc008926.1_g050.1; Cse_sc012338.1_g070.1; Cse_sc019827.1_g020.1; Cse_sc029823.1_g010.1; Cse_sc038036.1_g010.1
ko00362	Benzoate degradation	2	1674	8	12025	0.0877911	0.208504	1.79585	Cse_sc000420.1_g200.1; Cse_sc003513.1_g010.1
ko00471	D-Glutamine and D-glutamate metabolism	2	1674	8	12025	0.0877911	0.208504	1.79585	Cse_sc014030.1_g020.1; Cse_sc020466.1_g010.1
ko04070	Phosphatidylinositol signaling system	21	1674	118	12025	0.0910453	0.213563	1.2784	Cse_sc001146.1_g070.1; Cse_sc001186.1_g070.1; Cse_sc001351.1_g030.1; Cse_sc001384.1_g180.1; Cse_sc001929.1_g020.1; Cse_sc004926.1_g060.1; Cse_sc005471.1_g130.1; Cse_sc006612.1_g010.1; Cse_sc006678.1_g030.1; Cse_sc008141.1_g060.1; Cse_sc008289.1_g050.1; Cse_sc008848.1_g010.1; Cse_sc014976.1_g040.1; Cse_sc018832.1_g020.1; Cse_sc021295.1_g040.1; Cse_sc024916.1_g010.1; Cse_sc029930.1_g020.1; Cse_sc03…
ko00909	Sesquiterpenoid and triterpenoid biosynthesis	14	1674	76	12025	0.0999124	0.231504	1.32326	Cse_sc000056.1_g050.1; Cse_sc000315.1_g010.1; Cse_sc001700.1_g050.1; Cse_sc002185.1_g070.1; Cse_sc004085.1_g050.1; Cse_sc004817.1_g020.1; Cse_sc009517.1_g040.1; Cse_sc009996.1_g020.1; Cse_sc013289.1_g050.1; Cse_sc030951.1_g010.1; Cse_sc039633.1_g010.1; Cse_sc066161.1_g010.1; Cse_sc107446.1_g010.1; Cse_sc156751.1_g010.1
ko04020	Calcium signaling pathway	14	1674	78	12025	0.118412	0.27027	1.28933	Cse_sc000224.1_g010.1; Cse_sc000228.1_g150.1; Cse_sc000753.1_g020.1; Cse_sc002858.1_g020.1; Cse_sc004305.1_g030.1; Cse_sc008141.1_g060.1; Cse_sc008289.1_g050.1; Cse_sc011275.1_g020.1; Cse_sc012338.1_g070.1; Cse_sc021005.1_g020.1; Cse_sc021295.1_g040.1; Cse_sc024916.1_g010.1; Cse_sc038036.1_g010.1; Cse_sc050270.1_g010.1
ko00280	Valine, leucine and isoleucine degradation	21	1674	122	12025	0.119501	0.27027	1.23649	Cse_sc000420.1_g200.1; Cse_sc000844.1_g080.1; Cse_sc002368.1_g010.1; Cse_sc002813.1_g050.1; Cse_sc003513.1_g010.1; Cse_sc003569.1_g060.1; Cse_sc005778.1_g030.1; Cse_sc007222.1_g050.1; Cse_sc009861.1_g030.1; Cse_sc015187.1_g010.1; Cse_sc015187.1_g020.1; Cse_sc017166.1_g030.1; Cse_sc018695.1_g020.1; Cse_sc020155.1_g010.1; Cse_sc020364.1_g010.1; Cse_sc021254.1_g010.1; Cse_sc026781.1_g010.1; Cse_sc02…
ko00830	Retinol metabolism	9	1674	48	12025	0.122017	0.27027	1.34689	Cse_sc000042.1_g060.1; Cse_sc000240.1_g140.1; Cse_sc004567.1_g050.1; Cse_sc006225.1_g030.1; Cse_sc007061.1_g040.1; Cse_sc010895.1_g010.1; Cse_sc016526.1_g010.1; Cse_sc026932.1_g010.1; Cse_sc047617.1_g010.1
ko04540	Gap junction	10	1674	54	12025	0.122333	0.27027	1.33026	Cse_sc001986.1_g040.1; Cse_sc002422.1_g030.1; Cse_sc006712.1_g040.1; Cse_sc008926.1_g050.1; Cse_sc009890.1_g050.1; Cse_sc014058.1_g020.1; Cse_sc014573.1_g020.1; Cse_sc017034.1_g010.1; Cse_sc026173.1_g010.1; Cse_sc029034.1_g010.1
ko04391	Hippo signaling pathway - fly	13	1674	73	12025	0.130383	0.284745	1.27923	Cse_sc000699.1_g050.1; Cse_sc000726.1_g010.1; Cse_sc001105.1_g050.1; Cse_sc001573.1_g070.1; Cse_sc008091.1_g010.1; Cse_sc011307.1_g020.1; Cse_sc013681.1_g010.1; Cse_sc014832.1_g010.1; Cse_sc014832.1_g020.1; Cse_sc019795.1_g010.1; Cse_sc032616.1_g020.1; Cse_sc035766.1_g020.1; Cse_sc057304.1_g010.1
ko00900	Terpenoid backbone biosynthesis	22	1674	131	12025	0.140346	0.303019	1.20637	Cse_sc000019.1_g040.1; Cse_sc000274.1_g150.1; Cse_sc000420.1_g200.1; Cse_sc002368.1_g010.1; Cse_sc003513.1_g010.1; Cse_sc004138.1_g060.1; Cse_sc004992.1_g030.1; Cse_sc005027.1_g030.1; Cse_sc006099.1_g030.1; Cse_sc008936.1_g020.1; Cse_sc009063.1_g020.1; Cse_sc010683.1_g010.1; Cse_sc014297.1_g020.1; Cse_sc014367.1_g050.1; Cse_sc015676.1_g030.1; Cse_sc020708.1_g010.1; Cse_sc021169.1_g010.1; Cse_sc02…
ko00460	Cyanoamino acid metabolism	35	1674	218	12025	0.15449	0.329811	1.1533	Cse_sc001318.1_g120.1; Cse_sc001853.1_g020.1; Cse_sc001993.1_g010.1; Cse_sc002053.1_g010.1; Cse_sc003292.1_g050.1; Cse_sc003411.1_g030.1; Cse_sc003421.1_g030.1; Cse_sc003501.1_g010.1; Cse_sc003850.1_g030.1; Cse_sc004678.1_g060.1; Cse_sc005906.1_g050.1; Cse_sc006024.1_g020.1; Cse_sc006141.1_g020.1; Cse_sc006636.1_g030.1; Cse_sc006852.1_g010.1; Cse_sc008524.1_g040.1; Cse_sc010864.1_g030.1; Cse_sc01…
ko00270	Cysteine and methionine metabolism	34	1674	213	12025	0.165924	0.347225	1.14664	Cse_sc000030.1_g060.1; Cse_sc000075.1_g040.1; Cse_sc000696.1_g030.1; Cse_sc001194.1_g070.1; Cse_sc001201.1_g050.1; Cse_sc001695.1_g050.1; Cse_sc003230.1_g030.1; Cse_sc003457.1_g080.1; Cse_sc003849.1_g020.1; Cse_sc005778.1_g030.1; Cse_sc006323.1_g010.1; Cse_sc006604.1_g050.1; Cse_sc008851.1_g030.1; Cse_sc008903.1_g020.1; Cse_sc008955.1_g030.1; Cse_sc010876.1_g010.1; Cse_sc011679.1_g010.1; Cse_sc01…
ko02020	Two-component system	6	1674	33	12025	0.166302	0.347225	1.30607	Cse_sc000420.1_g200.1; Cse_sc000738.1_g040.1; Cse_sc002796.1_g040.1; Cse_sc003513.1_g010.1; Cse_sc005100.1_g040.1; Cse_sc019091.1_g010.1
ko00072	Synthesis and degradation of ketone bodies	3	1674	16	12025	0.173556	0.357306	1.34689	Cse_sc000420.1_g200.1; Cse_sc002368.1_g010.1; Cse_sc003513.1_g010.1
ko00480	Glutathione metabolism	29	1674	181	12025	0.174892	0.357306	1.15093	Cse_sc000172.1_g080.1; Cse_sc000461.1_g040.1; Cse_sc000487.1_g040.1; Cse_sc001777.1_g040.1; Cse_sc001853.1_g020.1; Cse_sc002337.1_g090.1; Cse_sc002485.1_g010.1; Cse_sc002809.1_g060.1; Cse_sc003394.1_g030.1; Cse_sc003421.1_g030.1; Cse_sc004151.1_g020.1; Cse_sc005477.1_g010.1; Cse_sc005906.1_g050.1; Cse_sc006604.1_g050.1; Cse_sc009423.1_g040.1; Cse_sc010181.1_g050.1; Cse_sc010876.1_g010.1; Cse_sc01…
ko00902	Monoterpenoid biosynthesis	8	1674	46	12025	0.1822	0.368277	1.24929	Cse_sc001722.1_g010.1; Cse_sc007353.1_g030.1; Cse_sc008649.1_g010.1; Cse_sc010418.1_g020.1; Cse_sc010487.1_g020.1; Cse_sc012291.1_g020.1; Cse_sc015118.1_g010.1; Cse_sc050610.1_g010.1
ko04210	Apoptosis	11	1674	65	12025	0.18626	0.37252	1.21565	Cse_sc001386.1_g050.1; Cse_sc004512.1_g060.1; Cse_sc006712.1_g040.1; Cse_sc008926.1_g050.1; Cse_sc009540.1_g030.1; Cse_sc009890.1_g050.1; Cse_sc014573.1_g020.1; Cse_sc016333.1_g020.1; Cse_sc021231.1_g040.1; Cse_sc026173.1_g010.1; Cse_sc051606.1_g030.1
ko00630	Glyoxylate and dicarboxylate metabolism	27	1674	170	12025	0.194063	0.384083	1.14089	Cse_sc000420.1_g200.1; Cse_sc000639.1_g090.1; Cse_sc000639.1_g110.1; Cse_sc000738.1_g040.1; Cse_sc001201.1_g050.1; Cse_sc001388.1_g060.1; Cse_sc002053.1_g010.1; Cse_sc003503.1_g020.1; Cse_sc003513.1_g010.1; Cse_sc006024.1_g020.1; Cse_sc006351.1_g010.1; Cse_sc007314.1_g020.1; Cse_sc007926.1_g020.1; Cse_sc009861.1_g030.1; Cse_sc010864.1_g030.1; Cse_sc010949.1_g010.1; Cse_sc013532.1_g020.1; Cse_sc01…
ko00260	Glycine, serine and threonine metabolism	27	1674	171	12025	0.203012	0.391276	1.13422	Cse_sc000133.1_g050.1; Cse_sc000639.1_g090.1; Cse_sc000639.1_g110.1; Cse_sc001754.1_g050.1; Cse_sc001966.1_g060.1; Cse_sc002053.1_g010.1; Cse_sc003503.1_g020.1; Cse_sc003688.1_g010.1; Cse_sc003845.1_g020.1; Cse_sc003925.1_g070.1; Cse_sc005738.1_g050.1; Cse_sc006517.1_g020.1; Cse_sc006736.1_g020.1; Cse_sc006857.1_g010.1; Cse_sc007536.1_g050.1; Cse_sc009453.1_g020.1; Cse_sc009861.1_g030.1; Cse_sc01…
ko00626	Naphthalene degradation	3	1674	17	12025	0.203521	0.391276	1.26766	Cse_sc000042.1_g060.1; Cse_sc007061.1_g040.1; Cse_sc026932.1_g010.1
ko04151	PI3K-Akt signaling pathway	31	1674	198	12025	0.20519	0.391276	1.12467	Cse_sc000082.1_g020.1; Cse_sc000162.1_g100.1; Cse_sc000162.1_g110.1; Cse_sc000699.1_g050.1; Cse_sc000700.1_g110.1; Cse_sc001105.1_g050.1; Cse_sc001880.1_g070.1; Cse_sc004105.1_g030.1; Cse_sc004259.1_g010.1; Cse_sc005960.1_g030.1; Cse_sc006014.1_g030.1; Cse_sc006690.1_g030.1; Cse_sc008091.1_g010.1; Cse_sc008926.1_g050.1; Cse_sc009201.1_g020.1; Cse_sc010016.1_g030.1; Cse_sc011307.1_g020.1; Cse_sc01…
ko04145	Phagosome	28	1674	178	12025	0.205935	0.391276	1.12997	Cse_sc001186.1_g070.1; Cse_sc001384.1_g180.1; Cse_sc001972.1_g020.1; Cse_sc001986.1_g040.1; Cse_sc002422.1_g030.1; Cse_sc004259.1_g010.1; Cse_sc005780.1_g090.1; Cse_sc005960.1_g030.1; Cse_sc006712.1_g040.1; Cse_sc008825.1_g010.1; Cse_sc008869.1_g030.1; Cse_sc009890.1_g050.1; Cse_sc014058.1_g020.1; Cse_sc014573.1_g020.1; Cse_sc016333.1_g020.1; Cse_sc017034.1_g010.1; Cse_sc019281.1_g020.1; Cse_sc01…
ko04146	Peroxisome	29	1674	185	12025	0.208687	0.392579	1.12605	Cse_sc000236.1_g060.1; Cse_sc000643.1_g020.1; Cse_sc001367.1_g030.1; Cse_sc001388.1_g060.1; Cse_sc001642.1_g080.1; Cse_sc002522.1_g120.1; Cse_sc003085.1_g050.1; Cse_sc004427.1_g070.1; Cse_sc007116.1_g020.1; Cse_sc007314.1_g020.1; Cse_sc007448.1_g030.1; Cse_sc009063.1_g020.1; Cse_sc009590.1_g070.1; Cse_sc010949.1_g010.1; Cse_sc014539.1_g030.1; Cse_sc014953.1_g020.1; Cse_sc015465.1_g050.1; Cse_sc01…
ko00220	Arginine biosynthesis	11	1674	67	12025	0.215694	0.401782	1.17936	Cse_sc000155.1_g030.1; Cse_sc000543.1_g030.1; Cse_sc000738.1_g040.1; Cse_sc000920.1_g100.1; Cse_sc008063.1_g050.1; Cse_sc010695.1_g030.1; Cse_sc012305.1_g050.1; Cse_sc014030.1_g020.1; Cse_sc019091.1_g010.1; Cse_sc020466.1_g010.1; Cse_sc034207.1_g020.1
ko04142	Lysosome	26	1674	167	12025	0.228328	0.421187	1.11837	Cse_sc000031.1_g090.1; Cse_sc000302.1_g030.1; Cse_sc001778.1_g050.1; Cse_sc002028.1_g040.1; Cse_sc003484.1_g030.1; Cse_sc003484.1_g050.1; Cse_sc004512.1_g060.1; Cse_sc004522.1_g020.1; Cse_sc005780.1_g090.1; Cse_sc006139.1_g010.1; Cse_sc008055.1_g040.1; Cse_sc008560.1_g060.1; Cse_sc009540.1_g030.1; Cse_sc011909.1_g040.1; Cse_sc011972.1_g100.1; Cse_sc013183.1_g030.1; Cse_sc015362.1_g030.1; Cse_sc01…
ko04130	SNARE interactions in vesicular transport	12	1674	75	12025	0.238826	0.436316	1.14934	Cse_sc001036.1_g020.1; Cse_sc001313.1_g010.1; Cse_sc001470.1_g080.1; Cse_sc003085.1_g020.1; Cse_sc007682.1_g010.1; Cse_sc008373.1_g020.1; Cse_sc017989.1_g030.1; Cse_sc022651.1_g020.1; Cse_sc028513.1_g010.1; Cse_sc031645.1_g020.1; Cse_sc034253.1_g010.1; Cse_sc038641.1_g010.1
ko00620	Pyruvate metabolism	36	1674	237	12025	0.249235	0.450997	1.09115	Cse_sc000420.1_g200.1; Cse_sc000494.1_g130.1; Cse_sc000512.1_g020.1; Cse_sc000844.1_g080.1; Cse_sc001201.1_g050.1; Cse_sc001677.1_g030.1; Cse_sc002288.1_g040.1; Cse_sc002311.1_g040.1; Cse_sc002813.1_g050.1; Cse_sc003513.1_g010.1; Cse_sc003583.1_g060.1; Cse_sc003658.1_g010.1; Cse_sc005134.1_g010.1; Cse_sc005255.1_g010.1; Cse_sc005743.1_g020.1; Cse_sc005839.1_g040.1; Cse_sc007222.1_g050.1; Cse_sc00…
ko00650	Butanoate metabolism	7	1674	44	12025	0.26333	0.461879	1.14281	Cse_sc000420.1_g200.1; Cse_sc002368.1_g010.1; Cse_sc003513.1_g010.1; Cse_sc007991.1_g040.1; Cse_sc044029.1_g010.1; Cse_sc058821.1_g010.1; Cse_sc061066.1_g020.1
ko01210	2-Oxocarboxylic acid metabolism	24	1674	157	12025	0.264198	0.461879	1.0981	Cse_sc000155.1_g030.1; Cse_sc000543.1_g030.1; Cse_sc000920.1_g100.1; Cse_sc001677.1_g030.1; Cse_sc001845.1_g010.1; Cse_sc001845.1_g020.1; Cse_sc001993.1_g010.1; Cse_sc003292.1_g050.1; Cse_sc005743.1_g020.1; Cse_sc005778.1_g030.1; Cse_sc008063.1_g050.1; Cse_sc008140.1_g030.1; Cse_sc010548.1_g010.1; Cse_sc010695.1_g030.1; Cse_sc012305.1_g050.1; Cse_sc012830.1_g010.1; Cse_sc013681.1_g020.1; Cse_sc01…
ko01200	Carbon metabolism	97	1674	662	12025	0.266074	0.461879	1.05255	Cse_sc000132.1_g120.1; Cse_sc000266.1_g050.1; Cse_sc000420.1_g200.1; Cse_sc000494.1_g130.1; Cse_sc000512.1_g020.1; Cse_sc000639.1_g090.1; Cse_sc000639.1_g110.1; Cse_sc000696.1_g030.1; Cse_sc000920.1_g100.1; Cse_sc001201.1_g050.1; Cse_sc001388.1_g060.1; Cse_sc001499.1_g040.1; Cse_sc001499.1_g080.1; Cse_sc001748.1_g010.1; Cse_sc001754.1_g050.1; Cse_sc002053.1_g010.1; Cse_sc002174.1_g010.1; Cse_sc00…
ko00942	Anthocyanin biosynthesis	3	1674	19	12025	0.267209	0.461879	1.13422	Cse_sc003646.1_g060.1; Cse_sc016368.1_g010.1; Cse_sc039333.1_g010.1
ko00643	Styrene degradation	2	1674	13	12025	0.267404	0.461879	1.10514	Cse_sc018446.1_g010.1; Cse_sc018446.1_g020.1
ko04152	AMPK signaling pathway	30	1674	199	12025	0.276423	0.473157	1.08292	Cse_sc000019.1_g040.1; Cse_sc000082.1_g020.1; Cse_sc000700.1_g110.1; Cse_sc000877.1_g140.1; Cse_sc001880.1_g070.1; Cse_sc003509.1_g050.1; Cse_sc003594.1_g030.1; Cse_sc004105.1_g030.1; Cse_sc005621.1_g030.1; Cse_sc006014.1_g030.1; Cse_sc006690.1_g030.1; Cse_sc007276.1_g060.1; Cse_sc008936.1_g020.1; Cse_sc009201.1_g020.1; Cse_sc009584.1_g040.1; Cse_sc014358.1_g010.1; Cse_sc015732.1_g020.1; Cse_sc02…
ko00400	Phenylalanine, tyrosine and tryptophan biosynthesis	22	1674	146	12025	0.293366	0.497675	1.08243	Cse_sc001966.1_g060.1; Cse_sc002748.1_g090.1; Cse_sc002868.1_g020.1; Cse_sc003230.1_g030.1; Cse_sc003720.1_g030.1; Cse_sc004160.1_g050.1; Cse_sc005738.1_g050.1; Cse_sc006249.1_g040.1; Cse_sc006323.1_g010.1; Cse_sc006736.1_g020.1; Cse_sc007995.1_g020.1; Cse_sc008903.1_g020.1; Cse_sc011307.1_g040.1; Cse_sc016320.1_g010.1; Cse_sc016320.1_g040.1; Cse_sc018159.1_g040.1; Cse_sc023763.1_g020.1; Cse_sc02…
ko01220	Degradation of aromatic compounds	3	1674	20	12025	0.300294	0.498577	1.07751	Cse_sc000042.1_g060.1; Cse_sc007061.1_g040.1; Cse_sc026932.1_g010.1
ko00521	Streptomycin biosynthesis	3	1674	20	12025	0.300294	0.498577	1.07751	Cse_sc012103.1_g020.1; Cse_sc031249.1_g020.1; Cse_sc046242.1_g010.1
ko00010	Glycolysis / Gluconeogenesis	48	1674	326	12025	0.30177	0.498577	1.05768	Cse_sc000042.1_g060.1; Cse_sc000132.1_g120.1; Cse_sc000206.1_g080.1; Cse_sc000266.1_g050.1; Cse_sc000512.1_g020.1; Cse_sc000689.1_g080.1; Cse_sc000844.1_g080.1; Cse_sc001094.1_g110.1; Cse_sc001754.1_g050.1; Cse_sc002288.1_g040.1; Cse_sc002557.1_g210.1; Cse_sc002660.1_g060.1; Cse_sc002679.1_g010.1; Cse_sc002699.1_g050.1; Cse_sc002813.1_g050.1; Cse_sc003120.1_g020.1; Cse_sc003321.1_g010.1; Cse_sc00…
ko01051	Biosynthesis of ansamycins	2	1674	14	12025	0.307878	0.504283	1.0262	Cse_sc026215.1_g010.1; Cse_sc052302.1_g010.1
ko00960	Tropane, piperidine and pyridine alkaloid biosynthesis	6	1674	40	12025	0.318955	0.51796	1.07751	Cse_sc000133.1_g050.1; Cse_sc003230.1_g030.1; Cse_sc003845.1_g020.1; Cse_sc006323.1_g010.1; Cse_sc008903.1_g020.1; Cse_sc034207.1_g020.1
ko00524	Neomycin, kanamycin and gentamicin biosynthesis	2	1674	15	12025	0.348528	0.556473	0.957786	Cse_sc012103.1_g020.1; Cse_sc046242.1_g010.1
ko00660	C5-Branched dibasic acid metabolism	2	1674	15	12025	0.348528	0.556473	0.957786	Cse_sc058821.1_g010.1; Cse_sc061066.1_g020.1
ko00760	Nicotinate and nicotinamide metabolism	5	1674	35	12025	0.359502	0.569211	1.0262	Cse_sc006169.1_g040.1; Cse_sc011516.1_g010.1; Cse_sc022934.1_g030.1; Cse_sc023096.1_g080.1; Cse_sc045909.1_g010.1
ko04520	Adherens junction	6	1674	42	12025	0.3668	0.575968	1.0262	Cse_sc003160.1_g040.1; Cse_sc004259.1_g010.1; Cse_sc005960.1_g030.1; Cse_sc008926.1_g050.1; Cse_sc019827.1_g020.1; Cse_sc029823.1_g010.1
ko04022	cGMP-PKG signaling pathway	14	1674	97	12025	0.372528	0.580166	1.03678	Cse_sc000224.1_g010.1; Cse_sc000228.1_g150.1; Cse_sc000753.1_g020.1; Cse_sc002858.1_g020.1; Cse_sc004305.1_g030.1; Cse_sc007199.1_g050.1; Cse_sc008289.1_g050.1; Cse_sc008926.1_g050.1; Cse_sc011275.1_g020.1; Cse_sc012338.1_g070.1; Cse_sc021005.1_g020.1; Cse_sc021295.1_g040.1; Cse_sc024916.1_g010.1; Cse_sc030739.1_g010.1
ko04012	ErbB signaling pathway	2	1674	16	12025	0.388906	0.60075	0.897924	Cse_sc008926.1_g050.1; Cse_sc023697.1_g020.1
ko01230	Biosynthesis of amino acids	88	1674	621	12025	0.398928	0.61126	1.01794	Cse_sc000030.1_g060.1; Cse_sc000155.1_g030.1; Cse_sc000543.1_g030.1; Cse_sc000696.1_g030.1; Cse_sc000738.1_g040.1; Cse_sc000920.1_g100.1; Cse_sc001351.1_g030.1; Cse_sc001677.1_g030.1; Cse_sc001754.1_g050.1; Cse_sc001966.1_g060.1; Cse_sc002053.1_g010.1; Cse_sc002288.1_g040.1; Cse_sc002374.1_g050.1; Cse_sc002557.1_g210.1; Cse_sc002660.1_g060.1; Cse_sc002699.1_g050.1; Cse_sc002748.1_g090.1; Cse_sc00…
ko00710	Carbon fixation in photosynthetic organisms	29	1674	205	12025	0.413549	0.623868	1.01619	Cse_sc000494.1_g130.1; Cse_sc000512.1_g020.1; Cse_sc000920.1_g100.1; Cse_sc001201.1_g050.1; Cse_sc002557.1_g210.1; Cse_sc003321.1_g010.1; Cse_sc003658.1_g010.1; Cse_sc005134.1_g010.1; Cse_sc005255.1_g010.1; Cse_sc006351.1_g010.1; Cse_sc007926.1_g020.1; Cse_sc008063.1_g050.1; Cse_sc009144.1_g020.1; Cse_sc011714.1_g030.1; Cse_sc014388.1_g010.1; Cse_sc016906.1_g010.1; Cse_sc017934.1_g010.1; Cse_sc02…
ko04668	TNF signaling pathway	1	1674	10	12025	0.415499	0.623868	0.718339	Cse_sc008926.1_g050.1
ko00600	Sphingolipid metabolism	7	1674	51	12025	0.417006	0.623868	0.985956	Cse_sc000677.1_g030.1; Cse_sc009352.1_g050.1; Cse_sc012827.1_g010.1; Cse_sc016815.1_g030.1; Cse_sc018516.1_g070.1; Cse_sc038036.1_g010.1; Cse_sc198888.1_g010.1
ko04150	mTOR signaling pathway	18	1674	129	12025	0.433252	0.639544	1.00233	Cse_sc000082.1_g020.1; Cse_sc000877.1_g140.1; Cse_sc001972.1_g020.1; Cse_sc004105.1_g030.1; Cse_sc004144.1_g010.1; Cse_sc006690.1_g030.1; Cse_sc008926.1_g050.1; Cse_sc009201.1_g020.1; Cse_sc014358.1_g010.1; Cse_sc023697.1_g020.1; Cse_sc025023.1_g010.1; Cse_sc026485.1_g010.1; Cse_sc030387.1_g020.1; Cse_sc030388.1_g010.1; Cse_sc037526.1_g010.1; Cse_sc041062.1_g020.1; Cse_sc042135.1_g020.1; Cse_sc05…
ko00730	Thiamine metabolism	3	1674	24	12025	0.434217	0.639544	0.897924	Cse_sc010683.1_g010.1; Cse_sc020708.1_g010.1; Cse_sc029146.1_g010.1
ko00450	Selenocompound metabolism	5	1674	38	12025	0.438444	0.640803	0.945183	Cse_sc000030.1_g060.1; Cse_sc005123.1_g020.1; Cse_sc008851.1_g030.1; Cse_sc010561.1_g020.1; Cse_sc039562.1_g010.1
ko00195	Photosynthesis	19	1674	138	12025	0.459976	0.66714	0.989018	Cse_sc000699.1_g060.1; Cse_sc001623.1_g040.1; Cse_sc003276.1_g050.1; Cse_sc003636.1_g020.1; Cse_sc005001.1_g100.1; Cse_sc005001.1_g110.1; Cse_sc007686.1_g020.1; Cse_sc009098.1_g020.1; Cse_sc010553.1_g070.1; Cse_sc011383.1_g010.1; Cse_sc016964.1_g050.1; Cse_sc018143.1_g030.1; Cse_sc018706.1_g010.1; Cse_sc020016.1_g010.1; Cse_sc028275.1_g020.1; Cse_sc039332.1_g010.1; Cse_sc039863.1_g040.1; Cse_sc04…
ko00640	Propanoate metabolism	13	1674	96	12025	0.469929	0.676414	0.972751	Cse_sc000420.1_g200.1; Cse_sc002311.1_g040.1; Cse_sc003513.1_g010.1; Cse_sc003569.1_g060.1; Cse_sc003583.1_g060.1; Cse_sc009861.1_g030.1; Cse_sc017166.1_g030.1; Cse_sc018695.1_g020.1; Cse_sc020155.1_g010.1; Cse_sc020364.1_g010.1; Cse_sc028497.1_g010.1; Cse_sc045708.1_g020.1; Cse_sc077363.1_g010.1
ko03450	Non-homologous end-joining	2	1674	19	12025	0.504922	0.716717	0.756147	Cse_sc017771.1_g010.1; Cse_sc017771.1_g030.1
ko04510	Focal adhesion	7	1674	55	12025	0.505474	0.716717	0.91425	Cse_sc004259.1_g010.1; Cse_sc005960.1_g030.1; Cse_sc008926.1_g050.1; Cse_sc019827.1_g020.1; Cse_sc029823.1_g010.1; Cse_sc030387.1_g020.1; Cse_sc030739.1_g010.1
ko00680	Methane metabolism	20	1674	151	12025	0.538051	0.757257	0.951443	Cse_sc000494.1_g130.1; Cse_sc001748.1_g010.1; Cse_sc001754.1_g050.1; Cse_sc002053.1_g010.1; Cse_sc002660.1_g060.1; Cse_sc002699.1_g050.1; Cse_sc003658.1_g010.1; Cse_sc003688.1_g010.1; Cse_sc005255.1_g010.1; Cse_sc005621.1_g030.1; Cse_sc009453.1_g020.1; Cse_sc010864.1_g030.1; Cse_sc014388.1_g010.1; Cse_sc015373.1_g040.1; Cse_sc015732.1_g020.1; Cse_sc021000.1_g010.1; Cse_sc026932.1_g010.1; Cse_sc02…
ko04550	Signaling pathways regulating pluripotency of stem cells	1	1674	13	12025	0.558177	0.779807	0.552569	Cse_sc008926.1_g050.1
ko00253	Tetracycline biosynthesis	2	1674	21	12025	0.575572	0.793912	0.684133	Cse_sc002311.1_g040.1; Cse_sc003583.1_g060.1
ko02010	ABC transporters	14	1674	110	12025	0.576631	0.793912	0.91425	Cse_sc000031.1_g090.1; Cse_sc000944.1_g030.1; Cse_sc001373.1_g090.1; Cse_sc001653.1_g080.1; Cse_sc004042.1_g030.1; Cse_sc004191.1_g020.1; Cse_sc011622.1_g030.1; Cse_sc020605.1_g010.1; Cse_sc022493.1_g020.1; Cse_sc026382.1_g010.1; Cse_sc028505.1_g030.1; Cse_sc036411.1_g010.1; Cse_sc036524.1_g020.1; Cse_sc039342.1_g020.1
ko00540	Lipopolysaccharide biosynthesis	1	1674	15	12025	0.638566	0.872859	0.478893	Cse_sc006841.1_g030.1
ko04214	Apoptosis - fly	3	1674	32	12025	0.669071	0.908025	0.673443	Cse_sc001386.1_g050.1; Cse_sc008926.1_g050.1; Cse_sc022631.1_g040.1
ko04115	p53 signaling pathway	10	1674	87	12025	0.681575	0.918435	0.825677	Cse_sc000264.1_g050.1; Cse_sc002337.1_g090.1; Cse_sc009402.1_g020.1; Cse_sc009922.1_g020.1; Cse_sc018959.1_g010.1; Cse_sc019267.1_g030.1; Cse_sc026202.1_g010.1; Cse_sc030387.1_g020.1; Cse_sc032055.1_g020.1; Cse_sc052162.1_g020.1
ko04392	Hippo signaling pathway -multiple species	1	1674	17	12025	0.706978	0.939774	0.422553	Cse_sc032616.1_g020.1
ko04144	Endocytosis	76	1674	582	12025	0.707304	0.939774	0.938038	Cse_sc000015.1_g050.1; Cse_sc000257.1_g060.1; Cse_sc000302.1_g030.1; Cse_sc000347.1_g030.1; Cse_sc000395.1_g030.1; Cse_sc000409.1_g010.1; Cse_sc000863.1_g070.1; Cse_sc000930.1_g100.1; Cse_sc001358.1_g010.1; Cse_sc001462.1_g040.1; Cse_sc001669.1_g010.1; Cse_sc002368.1_g030.1; Cse_sc002368.1_g090.1; Cse_sc003011.1_g040.1; Cse_sc003160.1_g040.1; Cse_sc003408.1_g020.1; Cse_sc003408.1_g060.1; Cse_sc00…
ko04390	Hippo signaling pathway	10	1674	91	12025	0.738247	0.974075	0.789384	Cse_sc000699.1_g050.1; Cse_sc001105.1_g050.1; Cse_sc008091.1_g010.1; Cse_sc011307.1_g020.1; Cse_sc013681.1_g010.1; Cse_sc019795.1_g010.1; Cse_sc030739.1_g010.1; Cse_sc032616.1_g020.1; Cse_sc035766.1_g020.1; Cse_sc057304.1_g010.1
ko00190	Oxidative phosphorylation	39	1674	314	12025	0.753632	0.987518	0.892205	Cse_sc000741.1_g050.1; Cse_sc001244.1_g090.1; Cse_sc001754.1_g060.1; Cse_sc001972.1_g020.1; Cse_sc001989.1_g050.1; Cse_sc002133.1_g030.1; Cse_sc002740.1_g080.1; Cse_sc002796.1_g040.1; Cse_sc004633.1_g040.1; Cse_sc005465.1_g020.1; Cse_sc005780.1_g090.1; Cse_sc006133.1_g010.1; Cse_sc006546.1_g050.1; Cse_sc009967.1_g010.1; Cse_sc010104.1_g010.1; Cse_sc011383.1_g010.1; Cse_sc013533.1_g020.1; Cse_sc01…
ko04139	Regulation of mitophagy - yeast	9	1674	86	12025	0.775672	1	0.75175	Cse_sc000839.1_g070.1; Cse_sc004926.1_g060.1; Cse_sc006612.1_g010.1; Cse_sc008642.1_g020.1; Cse_sc008848.1_g010.1; Cse_sc013108.1_g020.1; Cse_sc018832.1_g020.1; Cse_sc043695.1_g010.1; Cse_sc057623.1_g010.1
ko03410	Base excision repair	7	1674	70	12025	0.776571	1	0.718339	Cse_sc001386.1_g050.1; Cse_sc001425.1_g070.1; Cse_sc001476.1_g040.1; Cse_sc006546.1_g030.1; Cse_sc017771.1_g010.1; Cse_sc017771.1_g030.1; Cse_sc032802.1_g020.1
ko04064	NF-kappa B signaling pathway	14	1674	126	12025	0.780814	1	0.798155	Cse_sc001269.1_g070.1; Cse_sc001929.1_g090.1; Cse_sc007172.1_g010.1; Cse_sc008038.1_g010.1; Cse_sc009573.1_g010.1; Cse_sc010355.1_g010.1; Cse_sc017110.1_g010.1; Cse_sc020873.1_g010.1; Cse_sc022254.1_g010.1; Cse_sc022952.1_g010.1; Cse_sc029162.1_g030.1; Cse_sc031116.1_g020.1; Cse_sc051168.1_g010.1; Cse_sc065225.1_g010.1
ko00720	Carbon fixation pathways in prokaryotes	11	1674	104	12025	0.798982	1	0.759782	Cse_sc000420.1_g200.1; Cse_sc000494.1_g130.1; Cse_sc002311.1_g040.1; Cse_sc003513.1_g010.1; Cse_sc003583.1_g060.1; Cse_sc003658.1_g010.1; Cse_sc005255.1_g010.1; Cse_sc014209.1_g010.1; Cse_sc023895.1_g020.1; Cse_sc045144.1_g030.1; Cse_sc045708.1_g020.1
ko00790	Folate biosynthesis	2	1674	31	12025	0.826057	1	0.463445	Cse_sc005100.1_g040.1; Cse_sc018213.1_g050.1
ko04013	MAPK signaling pathway - fly	13	1674	123	12025	0.828015	1	0.75922	Cse_sc000009.1_g090.1; Cse_sc000139.1_g100.1; Cse_sc004259.1_g010.1; Cse_sc005960.1_g030.1; Cse_sc008926.1_g050.1; Cse_sc014479.1_g020.1; Cse_sc019827.1_g020.1; Cse_sc021514.1_g020.1; Cse_sc026202.1_g010.1; Cse_sc029823.1_g010.1; Cse_sc030967.1_g010.1; Cse_sc033949.1_g020.1; Cse_sc052162.1_g020.1
ko00510	N-Glycan biosynthesis	6	1674	67	12025	0.842072	1	0.643289	Cse_sc000198.1_g050.1; Cse_sc002270.1_g010.1; Cse_sc005693.1_g040.1; Cse_sc006451.1_g010.1; Cse_sc010148.1_g020.1; Cse_sc040401.1_g010.1
ko04110	Cell cycle	38	1674	327	12025	0.873622	1	0.834767	Cse_sc000699.1_g050.1; Cse_sc001060.1_g030.1; Cse_sc001105.1_g050.1; Cse_sc001698.1_g050.1; Cse_sc002248.1_g020.1; Cse_sc002571.1_g060.1; Cse_sc002860.1_g050.1; Cse_sc003509.1_g050.1; Cse_sc004144.1_g010.1; Cse_sc004789.1_g070.1; Cse_sc007587.1_g010.1; Cse_sc008091.1_g010.1; Cse_sc009402.1_g020.1; Cse_sc009528.1_g020.1; Cse_sc009540.1_g040.1; Cse_sc010027.1_g020.1; Cse_sc010054.1_g020.1; Cse_sc01…
ko00250	Alanine, aspartate and glutamate metabolism	11	1674	113	12025	0.878853	1	0.699268	Cse_sc000439.1_g080.1; Cse_sc000738.1_g040.1; Cse_sc000920.1_g100.1; Cse_sc007991.1_g040.1; Cse_sc008063.1_g050.1; Cse_sc014030.1_g020.1; Cse_sc019091.1_g010.1; Cse_sc020466.1_g010.1; Cse_sc034207.1_g020.1; Cse_sc035564.1_g020.1; Cse_sc044029.1_g010.1
ko00670	One carbon pool by folate	3	1674	45	12025	0.889687	1	0.478893	Cse_sc002053.1_g010.1; Cse_sc010864.1_g030.1; Cse_sc014209.1_g010.1
ko03070	Bacterial secretion system	2	1674	36	12025	0.894757	1	0.399077	Cse_sc010622.1_g030.1; Cse_sc019409.1_g020.1
ko04066	HIF-1 signaling pathway	9	1674	99	12025	0.898511	1	0.653036	Cse_sc002660.1_g060.1; Cse_sc002699.1_g050.1; Cse_sc003321.1_g010.1; Cse_sc008926.1_g050.1; Cse_sc012103.1_g020.1; Cse_sc015373.1_g040.1; Cse_sc023697.1_g020.1; Cse_sc046242.1_g010.1; Cse_sc049382.1_g010.1
ko04340	Hedgehog signaling pathway	8	1674	91	12025	0.902398	1	0.631507	Cse_sc002170.1_g040.1; Cse_sc002483.1_g060.1; Cse_sc002571.1_g060.1; Cse_sc007587.1_g010.1; Cse_sc008962.1_g020.1; Cse_sc017561.1_g040.1; Cse_sc032616.1_g020.1; Cse_sc100418.1_g010.1
ko04530	Tight junction	3	1674	49	12025	0.924482	1	0.4398	Cse_sc000108.1_g010.1; Cse_sc001095.1_g130.1; Cse_sc030387.1_g020.1
ko00563	Glycosylphosphatidylinositol(GPI)-anchor biosynthesis	1	1674	32	12025	0.949237	1	0.224481	Cse_sc010129.1_g080.1
ko04113	Meiosis - yeast	18	1674	189	12025	0.955968	1	0.684133	Cse_sc001060.1_g030.1; Cse_sc001698.1_g050.1; Cse_sc001880.1_g070.1; Cse_sc002248.1_g020.1; Cse_sc002494.1_g050.1; Cse_sc002860.1_g050.1; Cse_sc003843.1_g050.1; Cse_sc009528.1_g020.1; Cse_sc009540.1_g040.1; Cse_sc012137.1_g010.1; Cse_sc012911.1_g020.1; Cse_sc013657.1_g050.1; Cse_sc014001.1_g020.1; Cse_sc026658.1_g010.1; Cse_sc030739.1_g010.1; Cse_sc036053.1_g010.1; Cse_sc047353.1_g030.1; Cse_sc05…
ko04112	Cell cycle - Caulobacter	1	1674	35	12025	0.965116	1	0.20524	Cse_sc000486.1_g060.1
ko00513	Various types of N-glycan biosynthesis	2	1674	47	12025	0.968107	1	0.305676	Cse_sc000198.1_g050.1; Cse_sc040401.1_g010.1
ko00240	Pyrimidine metabolism	26	1674	262	12025	0.968139	1	0.712856	Cse_sc001076.1_g110.1; Cse_sc001476.1_g040.1; Cse_sc002337.1_g090.1; Cse_sc004717.1_g060.1; Cse_sc006206.1_g020.1; Cse_sc006457.1_g010.1; Cse_sc007015.1_g020.1; Cse_sc009585.1_g030.1; Cse_sc010181.1_g050.1; Cse_sc010546.1_g050.1; Cse_sc011028.1_g020.1; Cse_sc011390.1_g020.1; Cse_sc011516.1_g010.1; Cse_sc014477.1_g030.1; Cse_sc018700.1_g010.1; Cse_sc019442.1_g040.1; Cse_sc020451.1_g020.1; Cse_sc02…
ko04114	Oocyte meiosis	27	1674	274	12025	0.973765	1	0.707853	Cse_sc000224.1_g010.1; Cse_sc000699.1_g050.1; Cse_sc001060.1_g030.1; Cse_sc001105.1_g050.1; Cse_sc001880.1_g070.1; Cse_sc002248.1_g020.1; Cse_sc002571.1_g060.1; Cse_sc004789.1_g070.1; Cse_sc007587.1_g010.1; Cse_sc008091.1_g010.1; Cse_sc008289.1_g050.1; Cse_sc008926.1_g050.1; Cse_sc011307.1_g020.1; Cse_sc012338.1_g070.1; Cse_sc012911.1_g020.1; Cse_sc013681.1_g010.1; Cse_sc014001.1_g020.1; Cse_sc01…
ko04111	Cell cycle - yeast	25	1674	259	12025	0.976227	1	0.693378	Cse_sc000134.1_g080.1; Cse_sc000338.1_g030.1; Cse_sc001060.1_g030.1; Cse_sc001698.1_g050.1; Cse_sc002248.1_g020.1; Cse_sc002571.1_g060.1; Cse_sc002860.1_g050.1; Cse_sc004789.1_g070.1; Cse_sc007587.1_g010.1; Cse_sc008193.1_g020.1; Cse_sc009528.1_g020.1; Cse_sc009540.1_g040.1; Cse_sc010027.1_g020.1; Cse_sc010054.1_g020.1; Cse_sc010517.1_g020.1; Cse_sc012137.1_g010.1; Cse_sc012911.1_g020.1; Cse_sc01…
ko00970	Aminoacyl-tRNA biosynthesis	30	1674	303	12025	0.978694	1	0.711227	Cse_sc000541.1_g080.1; Cse_sc000552.1_g040.1; Cse_sc000570.1_g080.1; Cse_sc002052.1_g010.1; Cse_sc003564.1_g070.1; Cse_sc004117.1_g010.1; Cse_sc004237.1_g080.1; Cse_sc004595.1_g020.1; Cse_sc006932.1_g050.1; Cse_sc007725.1_g050.1; Cse_sc008101.1_g010.1; Cse_sc008447.1_g010.1; Cse_sc008601.1_g010.1; Cse_sc009386.1_g030.1; Cse_sc010561.1_g020.1; Cse_sc012181.1_g050.1; Cse_sc014194.1_g030.1; Cse_sc01…
ko03022	Basal transcription factors	6	1674	96	12025	0.985464	1	0.448962	Cse_sc000082.1_g010.1; Cse_sc004299.1_g040.1; Cse_sc006587.1_g030.1; Cse_sc006887.1_g040.1; Cse_sc034402.1_g010.1; Cse_sc117200.1_g010.1
ko04341	Hedgehog signaling pathway - fly	10	1674	138	12025	0.989077	1	0.520536	Cse_sc002170.1_g040.1; Cse_sc002483.1_g060.1; Cse_sc002571.1_g060.1; Cse_sc004789.1_g070.1; Cse_sc007587.1_g010.1; Cse_sc008962.1_g020.1; Cse_sc012667.1_g020.1; Cse_sc017561.1_g040.1; Cse_sc032616.1_g020.1; Cse_sc100418.1_g010.1
ko03018	RNA degradation	20	1674	237	12025	0.993658	1	0.606194	Cse_sc000308.1_g060.1; Cse_sc000902.1_g070.1; Cse_sc002195.1_g050.1; Cse_sc002660.1_g060.1; Cse_sc002699.1_g050.1; Cse_sc003360.1_g030.1; Cse_sc005621.1_g030.1; Cse_sc009160.1_g030.1; Cse_sc010447.1_g050.1; Cse_sc012666.1_g020.1; Cse_sc015373.1_g040.1; Cse_sc015732.1_g020.1; Cse_sc018153.1_g020.1; Cse_sc021596.1_g020.1; Cse_sc023550.1_g040.1; Cse_sc027012.1_g010.1; Cse_sc035947.1_g010.1; Cse_sc04…
ko04310	Wnt signaling pathway	16	1674	201	12025	0.993739	1	0.571812	Cse_sc000139.1_g100.1; Cse_sc000220.1_g030.1; Cse_sc000224.1_g010.1; Cse_sc002571.1_g060.1; Cse_sc004259.1_g010.1; Cse_sc004789.1_g070.1; Cse_sc005960.1_g030.1; Cse_sc007587.1_g010.1; Cse_sc012004.1_g020.1; Cse_sc012338.1_g070.1; Cse_sc019827.1_g020.1; Cse_sc026202.1_g010.1; Cse_sc029823.1_g010.1; Cse_sc032616.1_g020.1; Cse_sc052162.1_g020.1; Cse_sc100418.1_g010.1
ko00230	Purine metabolism	30	1674	331	12025	0.995667	1	0.651063	Cse_sc000272.1_g010.1; Cse_sc001023.1_g100.1; Cse_sc001076.1_g110.1; Cse_sc001476.1_g040.1; Cse_sc002288.1_g040.1; Cse_sc002337.1_g090.1; Cse_sc004264.1_g020.1; Cse_sc004514.1_g040.1; Cse_sc004717.1_g060.1; Cse_sc005123.1_g020.1; Cse_sc005839.1_g040.1; Cse_sc006457.1_g010.1; Cse_sc007015.1_g020.1; Cse_sc010181.1_g050.1; Cse_sc011516.1_g010.1; Cse_sc013305.1_g020.1; Cse_sc018700.1_g010.1; Cse_sc01…
ko00020	Citrate cycle (TCA cycle)	9	1674	140	12025	0.995971	1	0.46179	Cse_sc000512.1_g020.1; Cse_sc001201.1_g050.1; Cse_sc008424.1_g020.1; Cse_sc009861.1_g030.1; Cse_sc016906.1_g010.1; Cse_sc023895.1_g020.1; Cse_sc026710.1_g010.1; Cse_sc027501.1_g010.1; Cse_sc163611.1_g010.1
ko03030	DNA replication	62	1674	603	12025	0.996248	1	0.738591	Cse_sc000486.1_g030.1; Cse_sc000787.1_g020.1; Cse_sc000936.1_g080.1; Cse_sc001288.1_g100.1; Cse_sc001399.1_g060.1; Cse_sc001476.1_g040.1; Cse_sc001698.1_g050.1; Cse_sc002252.1_g010.1; Cse_sc002392.1_g030.1; Cse_sc002457.1_g030.1; Cse_sc002638.1_g030.1; Cse_sc002665.1_g110.1; Cse_sc002709.1_g020.1; Cse_sc002838.1_g030.1; Cse_sc002860.1_g050.1; Cse_sc003230.1_g040.1; Cse_sc003544.1_g010.1; Cse_sc00…
ko04120	Ubiquitin mediated proteolysis	37	1674	396	12025	0.996695	1	0.671176	Cse_sc000264.1_g050.1; Cse_sc001974.1_g020.1; Cse_sc002248.1_g020.1; Cse_sc002571.1_g060.1; Cse_sc004144.1_g010.1; Cse_sc004789.1_g070.1; Cse_sc005042.1_g010.1; Cse_sc007245.1_g030.1; Cse_sc007587.1_g010.1; Cse_sc008962.1_g020.1; Cse_sc009922.1_g020.1; Cse_sc010027.1_g020.1; Cse_sc010081.1_g040.1; Cse_sc010517.1_g020.1; Cse_sc011350.1_g010.1; Cse_sc016351.1_g010.1; Cse_sc017441.1_g010.1; Cse_sc01…
ko04010	MAPK signaling pathway	24	1674	284	12025	0.997028	1	0.607047	Cse_sc000224.1_g010.1; Cse_sc000347.1_g030.1; Cse_sc003408.1_g020.1; Cse_sc003408.1_g060.1; Cse_sc004259.1_g010.1; Cse_sc004939.1_g030.1; Cse_sc005960.1_g030.1; Cse_sc006394.1_g010.1; Cse_sc007199.1_g050.1; Cse_sc008086.1_g040.1; Cse_sc008926.1_g050.1; Cse_sc010468.1_g030.1; Cse_sc012338.1_g070.1; Cse_sc015131.1_g010.1; Cse_sc015387.1_g020.1; Cse_sc015656.1_g010.1; Cse_sc017823.1_g020.1; Cse_sc01…
ko04350	TGF-beta signaling pathway	6	1674	114	12025	0.99745	1	0.378073	Cse_sc002571.1_g060.1; Cse_sc004789.1_g070.1; Cse_sc007587.1_g010.1; Cse_sc008926.1_g050.1; Cse_sc023697.1_g020.1; Cse_sc100418.1_g010.1
ko03015	mRNA surveillance pathway	21	1674	261	12025	0.99777	1	0.577974	Cse_sc000108.1_g010.1; Cse_sc000308.1_g060.1; Cse_sc000700.1_g110.1; Cse_sc000902.1_g070.1; Cse_sc001224.1_g010.1; Cse_sc001880.1_g070.1; Cse_sc003100.1_g070.1; Cse_sc003360.1_g030.1; Cse_sc006014.1_g030.1; Cse_sc012076.1_g020.1; Cse_sc012234.1_g010.1; Cse_sc016307.1_g050.1; Cse_sc020467.1_g020.1; Cse_sc021596.1_g020.1; Cse_sc027012.1_g010.1; Cse_sc027801.1_g020.1; Cse_sc030739.1_g010.1; Cse_sc04…
ko03020	RNA polymerase	6	1674	117	12025	0.99812	1	0.368379	Cse_sc006457.1_g010.1; Cse_sc018700.1_g010.1; Cse_sc029786.1_g020.1; Cse_sc030651.1_g020.1; Cse_sc053264.1_g010.1; Cse_sc054048.1_g010.1
ko03060	Protein export	4	1674	100	12025	0.998952	1	0.287336	Cse_sc009541.1_g030.1; Cse_sc010622.1_g030.1; Cse_sc012121.1_g020.1; Cse_sc019409.1_g020.1
ko03460	Fanconi anemia pathway	56	1674	579	12025	0.998993	1	0.694767	Cse_sc000486.1_g030.1; Cse_sc000787.1_g020.1; Cse_sc000936.1_g080.1; Cse_sc001288.1_g100.1; Cse_sc001399.1_g060.1; Cse_sc001696.1_g010.1; Cse_sc002252.1_g010.1; Cse_sc002392.1_g030.1; Cse_sc002457.1_g030.1; Cse_sc002518.1_g040.1; Cse_sc002638.1_g030.1; Cse_sc002665.1_g110.1; Cse_sc002709.1_g020.1; Cse_sc002838.1_g030.1; Cse_sc003230.1_g040.1; Cse_sc003544.1_g010.1; Cse_sc003711.1_g010.1; Cse_sc00…
ko03430	Mismatch repair	54	1674	576	12025	0.999537	1	0.673443	Cse_sc000486.1_g030.1; Cse_sc000749.1_g060.1; Cse_sc000787.1_g020.1; Cse_sc000936.1_g080.1; Cse_sc001288.1_g100.1; Cse_sc001399.1_g060.1; Cse_sc002252.1_g010.1; Cse_sc002392.1_g030.1; Cse_sc002457.1_g030.1; Cse_sc002638.1_g030.1; Cse_sc002665.1_g110.1; Cse_sc002709.1_g020.1; Cse_sc002838.1_g030.1; Cse_sc003230.1_g040.1; Cse_sc003544.1_g010.1; Cse_sc003711.1_g010.1; Cse_sc004242.1_g060.1; Cse_sc00…
ko03050	Proteasome	10	1674	174	12025	0.999554	1	0.412839	Cse_sc000978.1_g050.1; Cse_sc003183.1_g010.1; Cse_sc005799.1_g080.1; Cse_sc007663.1_g040.1; Cse_sc009439.1_g040.1; Cse_sc018167.1_g020.1; Cse_sc019795.1_g030.1; Cse_sc022100.1_g010.1; Cse_sc028198.1_g020.1; Cse_sc033483.1_g010.1
ko03440	Homologous recombination	53	1674	574	12025	0.999684	1	0.663275	Cse_sc000486.1_g030.1; Cse_sc000787.1_g020.1; Cse_sc000936.1_g080.1; Cse_sc001288.1_g100.1; Cse_sc001399.1_g060.1; Cse_sc002252.1_g010.1; Cse_sc002392.1_g030.1; Cse_sc002457.1_g030.1; Cse_sc002638.1_g030.1; Cse_sc002665.1_g110.1; Cse_sc002709.1_g020.1; Cse_sc002838.1_g030.1; Cse_sc003230.1_g040.1; Cse_sc003544.1_g010.1; Cse_sc003711.1_g010.1; Cse_sc004242.1_g060.1; Cse_sc004798.1_g050.1; Cse_sc00…
ko03420	Nucleotide excision repair	55	1674	614	12025	0.999919	1	0.643464	Cse_sc000486.1_g030.1; Cse_sc000787.1_g020.1; Cse_sc000936.1_g080.1; Cse_sc001288.1_g100.1; Cse_sc001399.1_g060.1; Cse_sc001476.1_g040.1; Cse_sc002252.1_g010.1; Cse_sc002392.1_g030.1; Cse_sc002457.1_g030.1; Cse_sc002638.1_g030.1; Cse_sc002665.1_g110.1; Cse_sc002709.1_g020.1; Cse_sc002838.1_g030.1; Cse_sc003230.1_g040.1; Cse_sc003544.1_g010.1; Cse_sc003711.1_g010.1; Cse_sc004242.1_g060.1; Cse_sc00…
ko03008	Ribosome biogenesis in eukaryotes	6	1674	177	12025	0.999998	1	0.243505	Cse_sc003682.1_g030.1; Cse_sc004041.1_g040.1; Cse_sc010610.1_g060.1; Cse_sc012341.1_g030.1; Cse_sc015159.1_g030.1; Cse_sc030686.1_g010.1
ko03013	RNA transport	28	1674	508	12025	1	1	0.395935	Cse_sc000308.1_g060.1; Cse_sc000374.1_g100.1; Cse_sc000374.1_g110.1; Cse_sc000902.1_g070.1; Cse_sc000935.1_g100.1; Cse_sc001207.1_g050.1; Cse_sc001219.1_g020.1; Cse_sc003360.1_g030.1; Cse_sc008679.1_g020.1; Cse_sc008744.1_g020.1; Cse_sc008771.1_g020.1; Cse_sc012341.1_g030.1; Cse_sc012536.1_g030.1; Cse_sc014274.1_g030.1; Cse_sc017048.1_g030.1; Cse_sc017939.1_g030.1; Cse_sc020873.1_g010.1; Cse_sc02…
ko04141	Protein processing in endoplasmic reticulum	50	1674	746	12025	1	1	0.481461	Cse_sc000033.1_g080.1; Cse_sc000162.1_g100.1; Cse_sc000162.1_g110.1; Cse_sc000198.1_g050.1; Cse_sc000347.1_g030.1; Cse_sc000726.1_g020.1; Cse_sc001239.1_g050.1; Cse_sc001416.1_g010.1; Cse_sc002571.1_g060.1; Cse_sc003408.1_g020.1; Cse_sc003408.1_g060.1; Cse_sc003604.1_g040.1; Cse_sc003604.1_g050.1; Cse_sc003870.1_g060.1; Cse_sc004789.1_g070.1; Cse_sc004939.1_g030.1; Cse_sc005301.1_g030.1; Cse_sc00…
ko03040	Spliceosome	26	1674	663	12025	1	1	0.281702	Cse_sc000016.1_g070.1; Cse_sc000347.1_g030.1; Cse_sc000607.1_g110.1; Cse_sc002945.1_g040.1; Cse_sc003302.1_g010.1; Cse_sc003408.1_g020.1; Cse_sc003408.1_g060.1; Cse_sc004939.1_g030.1; Cse_sc006394.1_g010.1; Cse_sc006702.1_g050.1; Cse_sc008086.1_g040.1; Cse_sc010468.1_g030.1; Cse_sc011066.1_g010.1; Cse_sc011241.1_g010.1; Cse_sc012221.1_g010.1; Cse_sc015131.1_g010.1; Cse_sc015387.1_g020.1; Cse_sc01…
ko03010	Ribosome	13	1674	561	12025	1	1	0.16646	Cse_sc001082.1_g060.1; Cse_sc003376.1_g020.1; Cse_sc003578.1_g030.1; Cse_sc010708.1_g050.1; Cse_sc013010.1_g030.1; Cse_sc022201.1_g010.1; Cse_sc022997.1_g010.1; Cse_sc025610.1_g030.1; Cse_sc026962.1_g020.1; Cse_sc027628.1_g010.1; Cse_sc029374.1_g010.1; Cse_sc030685.1_g030.1; Cse_sc045959.1_g010.1
